# Supplementary material for: Inferring the Association between the Risk of COVID-19 Case Fatality and N501Y Substitution in SARS-CoV-2
Source: MDPI journal article supplement (doi:10.3390/v13040638), 2021-04-08
Supplement: s1 [file s1]

We gratefully acknowledge the following Authors from the Originating laboratories responsible for obtaining the specimens, as well as the Submitting laboratories where the genome data were generated and shared via GISAID, on which this research is based.

All Submitters of data may be contacted directly via [www.gisaid.org](http://www.gisaid.org)

Authors are sorted alphabetically.

| Accession ID                                                                                                                                                                                                                                                                                                                                                                                                                                                                                                                                                                                                                                                                                                                                                                                                                                                                                                                                                                                                                                                                                                                                                                                                                                                                                                                                                                                                                                                                                                                                                                                                                                                                                                                                                                                                                                                                                                                                                                                                                                                                                                                                                                                                                                                                                                                                                                                                                                                                                                                                                                                                                                                                                                                                                                                                                                                                                                                                                                                             | Originating Laboratory                                                                                                                                                                                              | Submitting Laboratory                                                      | Authors                                                                                                                                                                                                                                                                                                                                                                                                                                                |
|----------------------------------------------------------------------------------------------------------------------------------------------------------------------------------------------------------------------------------------------------------------------------------------------------------------------------------------------------------------------------------------------------------------------------------------------------------------------------------------------------------------------------------------------------------------------------------------------------------------------------------------------------------------------------------------------------------------------------------------------------------------------------------------------------------------------------------------------------------------------------------------------------------------------------------------------------------------------------------------------------------------------------------------------------------------------------------------------------------------------------------------------------------------------------------------------------------------------------------------------------------------------------------------------------------------------------------------------------------------------------------------------------------------------------------------------------------------------------------------------------------------------------------------------------------------------------------------------------------------------------------------------------------------------------------------------------------------------------------------------------------------------------------------------------------------------------------------------------------------------------------------------------------------------------------------------------------------------------------------------------------------------------------------------------------------------------------------------------------------------------------------------------------------------------------------------------------------------------------------------------------------------------------------------------------------------------------------------------------------------------------------------------------------------------------------------------------------------------------------------------------------------------------------------------------------------------------------------------------------------------------------------------------------------------------------------------------------------------------------------------------------------------------------------------------------------------------------------------------------------------------------------------------------------------------------------------------------------------------------------------------|---------------------------------------------------------------------------------------------------------------------------------------------------------------------------------------------------------------------|----------------------------------------------------------------------------|--------------------------------------------------------------------------------------------------------------------------------------------------------------------------------------------------------------------------------------------------------------------------------------------------------------------------------------------------------------------------------------------------------------------------------------------------------|
| EPI_ISL_1000244, EPI_ISL_1000245, EPI_ISL_1000246, EPI_ISL_1000258, EPI_ISL_1000270, EPI_ISL_1000272                                                                                                                                                                                                                                                                                                                                                                                                                                                                                                                                                                                                                                                                                                                                                                                                                                                                                                                                                                                                                                                                                                                                                                                                                                                                                                                                                                                                                                                                                                                                                                                                                                                                                                                                                                                                                                                                                                                                                                                                                                                                                                                                                                                                                                                                                                                                                                                                                                                                                                                                                                                                                                                                                                                                                                                                                                                                                                     | Centre for Enzyme Innovation, University of Portsmouth / Translational Research Laboratory, Portsmouth Hospitals NHS Trust                                                                                          | COVID-19 Genomics UK (COG-UK) Consortium                                   | Angela Beckett,Salman Goudarzi,Christopher Fearn,Kate Cook,Katie Loveson,Sharon Glaysher,Scott Elliott,Samuel Robson                                                                                                                                                                                                                                                                                                                                   |
| EPI_ISL_1000665                                                                                                                                                                                                                                                                                                                                                                                                                                                                                                                                                                                                                                                                                                                                                                                                                                                                                                                                                                                                                                                                                                                                                                                                                                                                                                                                                                                                                                                                                                                                                                                                                                                                                                                                                                                                                                                                                                                                                                                                                                                                                                                                                                                                                                                                                                                                                                                                                                                                                                                                                                                                                                                                                                                                                                                                                                                                                                                                                                                          | Virology Department, Sheffield Teaching Hospitals NHS Foundation Trust/Department of Infection, Immunity and Cardiovascular Disease, The Medical School, University of Sheffield                                    | COVID-19 Genomics UK (COG-UK) Consortium                                   | Thushan de Silva, Matthew Parker, Nikki Smith, Adri Anygal, Rebecca Brown, Luke Green, Rachel Tucker, Paul Parsons, Danielle Groves, Katie Johnson, Laura Carrilero, Alex Keeley, Dave Partridge, Matthew Wyles, Benjamin Lindsey, Mehmet Yavuz, Mohammad Raza, Cariad Evans                                                                                                                                                                           |
| EPI_ISL_1000881, EPI_ISL_1000883, EPI_ISL_1000885, EPI_ISL_1000886, EPI_ISL_1000887, EPI_ISL_1000892, EPI_ISL_1000893, EPI_ISL_1000898, EPI_ISL_1000900, EPI_ISL_1000903, EPI_ISL_1000905, EPI_ISL_1000907, EPI_ISL_1000908                                                                                                                                                                                                                                                                                                                                                                                                                                                                                                                                                                                                                                                                                                                                                                                                                                                                                                                                                                                                                                                                                                                                                                                                                                                                                                                                                                                                                                                                                                                                                                                                                                                                                                                                                                                                                                                                                                                                                                                                                                                                                                                                                                                                                                                                                                                                                                                                                                                                                                                                                                                                                                                                                                                                                                              |                                                                                                                                                                                                                     |                                                                            |                                                                                                                                                                                                                                                                                                                                                                                                                                                        |
| see above                                                                                                                                                                                                                                                                                                                                                                                                                                                                                                                                                                                                                                                                                                                                                                                                                                                                                                                                                                                                                                                                                                                                                                                                                                                                                                                                                                                                                                                                                                                                                                                                                                                                                                                                                                                                                                                                                                                                                                                                                                                                                                                                                                                                                                                                                                                                                                                                                                                                                                                                                                                                                                                                                                                                                                                                                                                                                                                                                                                                | Bioinformatics and Biostatistics Lab, Advanced Sequencing Facility                                                                                                                                                  | COVID-19 Genomics UK (COG-UK) Consortium                                   | Aengus Stewart,Jerome Nicod,Chelsea Sawyer,Laura Cubitt,Harshil Patel,Margaret Crawford                                                                                                                                                                                                                                                                                                                                                                |
| EPI_ISL_1005947, EPI_ISL_1012376, EPI_ISL_1012388                                                                                                                                                                                                                                                                                                                                                                                                                                                                                                                                                                                                                                                                                                                                                                                                                                                                                                                                                                                                                                                                                                                                                                                                                                                                                                                                                                                                                                                                                                                                                                                                                                                                                                                                                                                                                                                                                                                                                                                                                                                                                                                                                                                                                                                                                                                                                                                                                                                                                                                                                                                                                                                                                                                                                                                                                                                                                                                                                        | Lighthouse Lab in Cambridge                                                                                                                                                                                         | Wellcome Sanger Institute for the COVID-19 Genomics UK (COG-UK) Consortium | Rob Howes, The Lighthouse Lab in Cambridge and Alex Alderton, Roberto Amato, Sonia Goncalves, Ewan Harrison, David K. Jackson, Ian Johnston, Dominic Kwiatkowski, Cordelia Langford, John Sillitoe on behalf of the Wellcome Sanger Institute COVID-19 Surveillance Team                                                                                                                                                                               |
| EPI_ISL_1018924                                                                                                                                                                                                                                                                                                                                                                                                                                                                                                                                                                                                                                                                                                                                                                                                                                                                                                                                                                                                                                                                                                                                                                                                                                                                                                                                                                                                                                                                                                                                                                                                                                                                                                                                                                                                                                                                                                                                                                                                                                                                                                                                                                                                                                                                                                                                                                                                                                                                                                                                                                                                                                                                                                                                                                                                                                                                                                                                                                                          | Lighthouse Lab in Cambridge                                                                                                                                                                                         | Wellcome Sanger Institute for the COVID-19 Genomics UK (COG-UK) Consortium | Rob Howes, The Lighthouse Lab in Cambridge and Alex Alderton, Roberto Amato, Jeffrey Barrett, Sonia Goncalves, Ewan Harrison, David K. Jackson, Ian Johnston, Dominic Kwiatkowski, Cordelia Langford, John Sillitoe on behalf of the Wellcome Sanger Institute COVID-19 Surveillance Team                                                                                                                                                              |
| EPI_ISL_1043207                                                                                                                                                                                                                                                                                                                                                                                                                                                                                                                                                                                                                                                                                                                                                                                                                                                                                                                                                                                                                                                                                                                                                                                                                                                                                                                                                                                                                                                                                                                                                                                                                                                                                                                                                                                                                                                                                                                                                                                                                                                                                                                                                                                                                                                                                                                                                                                                                                                                                                                                                                                                                                                                                                                                                                                                                                                                                                                                                                                          | Lighthouse Lab in Milton Keynes                                                                                                                                                                                     | Wellcome Sanger Institute for the COVID-19 Genomics UK (COG-UK) Consortium | The Lighthouse Lab in Milton Keynes and Alex Alderton, Roberto Amato, Jeffrey Barrett, Sonia Goncalves, Ewan Harrison, David K. Jackson, Ian Johnston, Dominic Kwiatkowski, Cordelia Langford, John Sillitoe on behalf of the Wellcome Sanger Institute COVID-19 Surveillance Team                                                                                                                                                                     |
| EPI_ISL_1046997, EPI_ISL_1046998, EPI_ISL_1047067                                                                                                                                                                                                                                                                                                                                                                                                                                                                                                                                                                                                                                                                                                                                                                                                                                                                                                                                                                                                                                                                                                                                                                                                                                                                                                                                                                                                                                                                                                                                                                                                                                                                                                                                                                                                                                                                                                                                                                                                                                                                                                                                                                                                                                                                                                                                                                                                                                                                                                                                                                                                                                                                                                                                                                                                                                                                                                                                                        | University of Birmingham                                                                                                                                                                                            | COVID-19 Genomics UK (COG-UK) Consortium                                   | Institute of Microbiology, University of Birmingham: Claire McMurray, Joanne Stockton, Samuel Nicholls, Radoslaw Poplawski, Will Rowe, Josh Quick, Nicholas Loman. University of Birmingham Testing Laboratory: Celina M Whalley, Andrew Bosworth, Charlotte Poxon, Kasun Wanigasooriya, Oliver Pickles, Mike Kidd, Alex Richter, Andrew D Beggs PHE Heartlands Lab: Husam Osman, Andrew Bosworth. Queen Elizabeth Hospital: Anna Casey                |
| EPI_ISL_1047858, EPI_ISL_1047859                                                                                                                                                                                                                                                                                                                                                                                                                                                                                                                                                                                                                                                                                                                                                                                                                                                                                                                                                                                                                                                                                                                                                                                                                                                                                                                                                                                                                                                                                                                                                                                                                                                                                                                                                                                                                                                                                                                                                                                                                                                                                                                                                                                                                                                                                                                                                                                                                                                                                                                                                                                                                                                                                                                                                                                                                                                                                                                                                                         | Virology Department, Royal Infirmary of Edinburgh, NHS Lothian / School of Biological Sciences, University of Edinburgh                                                                                             | COVID-19 Genomics UK (COG-UK) Consortium                                   | McHugh M, Dewar R, Cotton S, Rooke S, O'Toole Á, Scher E, Hill V, McCrone JT, Colquhoun R, Yu X, Jackson B, Rambaut A, Templeton K                                                                                                                                                                                                                                                                                                                     |
| EPI_ISL_1048056, EPI_ISL_1048096                                                                                                                                                                                                                                                                                                                                                                                                                                                                                                                                                                                                                                                                                                                                                                                                                                                                                                                                                                                                                                                                                                                                                                                                                                                                                                                                                                                                                                                                                                                                                                                                                                                                                                                                                                                                                                                                                                                                                                                                                                                                                                                                                                                                                                                                                                                                                                                                                                                                                                                                                                                                                                                                                                                                                                                                                                                                                                                                                                         | Barts Health NHS Trust                                                                                                                                                                                              | COVID-19 Genomics UK (COG-UK) Consortium                                   | CUTINO-MOGUEL, Maria-Teresa; HARRINGTON, David; OWOYEMI, Dola; KULASEGARAN-SHYLINI, Raghavendran; BROAD, Claire; KELE, Beatrix                                                                                                                                                                                                                                                                                                                         |
| EPI_ISL_1050233, EPI_ISL_1050234, EPI_ISL_1050235, EPI_ISL_1050236, EPI_ISL_1050237, EPI_ISL_1050238                                                                                                                                                                                                                                                                                                                                                                                                                                                                                                                                                                                                                                                                                                                                                                                                                                                                                                                                                                                                                                                                                                                                                                                                                                                                                                                                                                                                                                                                                                                                                                                                                                                                                                                                                                                                                                                                                                                                                                                                                                                                                                                                                                                                                                                                                                                                                                                                                                                                                                                                                                                                                                                                                                                                                                                                                                                                                                     | West of Scotland Specialist Virology Centre, NHSGGC / MRC-University of Glasgow Centre for Virus Research                                                                                                           | COVID-19 Genomics UK (COG-UK) Consortium                                   | Ana da Silva Filipe, Natasha Johnson, Kathy Smollett, David Mair, Stephen Carmichael, Alice Broos, Lily Tong, Jenna Nichols, Kyriaki Nomikou; Sarah McDonald; Richard Orton, Joseph Hughes, Sreenu Vattipally, David L Robertson; Alasdair MacLean, Rory Gunnson; Sharif Shaaban, Matthew Holden; Rachel Blacow, Guy Mollett, Kathy Li, James Shepherd, Antonia Ho, Emma Thomson                                                                       |
| EPI_ISL_1050431, EPI_ISL_1050432, EPI_ISL_1050433, EPI_ISL_1050437, EPI_ISL_1050438, EPI_ISL_1050449, EPI_ISL_1050452, EPI_ISL_1050453, EPI_ISL_1050454, EPI_ISL_1050455, EPI_ISL_1050456, EPI_ISL_1050463, EPI_ISL_1050467, EPI_ISL_1050468, EPI_ISL_1050469, EPI_ISL_1050470, EPI_ISL_1050471, EPI_ISL_1050472, EPI_ISL_1050473, EPI_ISL_1050474, EPI_ISL_1050475, EPI_ISL_1050476, EPI_ISL_1050477, EPI_ISL_1050478, EPI_ISL_1050479, EPI_ISL_1050480, EPI_ISL_1050481, EPI_ISL_1050482, EPI_ISL_1050483, EPI_ISL_1050484, EPI_ISL_1050485, EPI_ISL_1050486, EPI_ISL_1050487, EPI_ISL_1050488, EPI_ISL_1050489, EPI_ISL_1050490, EPI_ISL_1050492, EPI_ISL_1050493, EPI_ISL_1050494, EPI_ISL_1050495, EPI_ISL_1050496, EPI_ISL_1050497, EPI_ISL_1050499, EPI_ISL_1050500, EPI_ISL_1050501, EPI_ISL_1050503, EPI_ISL_1050504, EPI_ISL_1050505, EPI_ISL_1050506, EPI_ISL_1050507, EPI_ISL_1050509, EPI_ISL_1050512, EPI_ISL_1050513, EPI_ISL_1050514, EPI_ISL_1050515, EPI_ISL_1050518, EPI_ISL_1050522, EPI_ISL_1050523                                                                                                                                                                                                                                                                                                                                                                                                                                                                                                                                                                                                                                                                                                                                                                                                                                                                                                                                                                                                                                                                                                                                                                                                                                                                                                                                                                                                                                                                                                                                                                                                                                                                                                                                                                                                                                                                                                                                                                                 |                                                                                                                                                                                                                     |                                                                            |                                                                                                                                                                                                                                                                                                                                                                                                                                                        |
| see above                                                                                                                                                                                                                                                                                                                                                                                                                                                                                                                                                                                                                                                                                                                                                                                                                                                                                                                                                                                                                                                                                                                                                                                                                                                                                                                                                                                                                                                                                                                                                                                                                                                                                                                                                                                                                                                                                                                                                                                                                                                                                                                                                                                                                                                                                                                                                                                                                                                                                                                                                                                                                                                                                                                                                                                                                                                                                                                                                                                                | University College London, Great Ormond Street Hospital for Children NHS Foundation Trust, Imperial College Healthcare NHS Trust                                                                                    | COVID-19 Genomics UK (COG-UK) Consortium                                   | Sergi Castellano, Rachel Williams, Mark Kristiansen, Paola Resende Silva, Sunando Roy, Tony Brooks, Helena Tutill, Paola Niola, Patricia Dyal, Charlotte Williams, Leysa Forrest, Yasmin Panchbhaya, Jacqueline Findlay, Samuel Weeks, Julianne Brown, Kathryn Harris, Paul Randell, James Price, Alison Holmes, Judith Breuer                                                                                                                         |
| EPI_ISL_1051069, EPI_ISL_1051071, EPI_ISL_1051077, EPI_ISL_1051084, EPI_ISL_1051087, EPI_ISL_1051091, EPI_ISL_1051095, EPI_ISL_1051097, EPI_ISL_1051099, EPI_ISL_1051101, EPI_ISL_1051103, EPI_ISL_1051105, EPI_ISL_1051107, EPI_ISL_1051110, EPI_ISL_1051112, EPI_ISL_1051114, EPI_ISL_1051116, EPI_ISL_1051117, EPI_ISL_1051120, EPI_ISL_1051121, EPI_ISL_1051122, EPI_ISL_1051123, EPI_ISL_1051124, EPI_ISL_1051125, EPI_ISL_1051126, EPI_ISL_1051127, EPI_ISL_1051128, EPI_ISL_1051129, EPI_ISL_1051130, EPI_ISL_1051131, EPI_ISL_1051132, EPI_ISL_1051133, EPI_ISL_1051134, EPI_ISL_1051136, EPI_ISL_1051137, EPI_ISL_1051138, EPI_ISL_1051139, EPI_ISL_1051140, EPI_ISL_1051141, EPI_ISL_1051142, EPI_ISL_1051143, EPI_ISL_1051144, EPI_ISL_1051145, EPI_ISL_1051146, EPI_ISL_1051147, EPI_ISL_1051148, EPI_ISL_1051149, EPI_ISL_1051150, EPI_ISL_1051151, EPI_ISL_1051152, EPI_ISL_1051153, EPI_ISL_1051154, EPI_ISL_1051155, EPI_ISL_1051156, EPI_ISL_1051157, EPI_ISL_1051158, EPI_ISL_1051159, EPI_ISL_1051160, EPI_ISL_1051161, EPI_ISL_1051162, EPI_ISL_1051163, EPI_ISL_1051164, EPI_ISL_1051165, EPI_ISL_1051166, EPI_ISL_1051167, EPI_ISL_1051168, EPI_ISL_1051169, EPI_ISL_1051170, EPI_ISL_1051171, EPI_ISL_1051172, EPI_ISL_1051173, EPI_ISL_1051174, EPI_ISL_1051175, EPI_ISL_1051177, EPI_ISL_1051178, EPI_ISL_1051179, EPI_ISL_1051180, EPI_ISL_1051181, EPI_ISL_1051182, EPI_ISL_1051183, EPI_ISL_1051184, EPI_ISL_1051185, EPI_ISL_1051186, EPI_ISL_1051187, EPI_ISL_1051188, EPI_ISL_1051189, EPI_ISL_1051190, EPI_ISL_1051191, EPI_ISL_1051192, EPI_ISL_1051193, EPI_ISL_1051194, EPI_ISL_1051195, EPI_ISL_1051196, EPI_ISL_1051197, EPI_ISL_1051198, EPI_ISL_1051199, EPI_ISL_1051200, EPI_ISL_1051201, EPI_ISL_1051202, EPI_ISL_1051203, EPI_ISL_1051204, EPI_ISL_1051205, EPI_ISL_1051206, EPI_ISL_1051207, EPI_ISL_1051208, EPI_ISL_1051209, EPI_ISL_1051210, EPI_ISL_1051211, EPI_ISL_1051212, EPI_ISL_1051214, EPI_ISL_1051217, EPI_ISL_1051220, EPI_ISL_1051221, EPI_ISL_1051345, EPI_ISL_1051346, EPI_ISL_1051347, EPI_ISL_1051348, EPI_ISL_1051349, EPI_ISL_1051350, EPI_ISL_1051351, EPI_ISL_1051352, EPI_ISL_1051353, EPI_ISL_1051354, EPI_ISL_1051355, EPI_ISL_1051356, EPI_ISL_1051357, EPI_ISL_1051358, EPI_ISL_1051359, EPI_ISL_1051360, EPI_ISL_1051361, EPI_ISL_1051362, EPI_ISL_1051363, EPI_ISL_1051364, EPI_ISL_1051365, EPI_ISL_1051366, EPI_ISL_1051367, EPI_ISL_1051368, EPI_ISL_1051369, EPI_ISL_1051370, EPI_ISL_1051371, EPI_ISL_1051372, EPI_ISL_1051373, EPI_ISL_1051374, EPI_ISL_1051375, EPI_ISL_1051376, EPI_ISL_1051377, EPI_ISL_1051378, EPI_ISL_1051379, EPI_ISL_1051380, EPI_ISL_1051381, EPI_ISL_1051382, EPI_ISL_1051383, EPI_ISL_1051384, EPI_ISL_1051385, EPI_ISL_1051386, EPI_ISL_1051387, EPI_ISL_1051388, EPI_ISL_1051389, EPI_ISL_1051390, EPI_ISL_1051391, EPI_ISL_1051392, EPI_ISL_1051393, EPI_ISL_1051394, EPI_ISL_1051395, EPI_ISL_1051396, EPI_ISL_1051397, EPI_ISL_1051398, EPI_ISL_1051399, EPI_ISL_1051400, EPI_ISL_1051401 |                                                                                                                                                                                                                     |                                                                            |                                                                                                                                                                                                                                                                                                                                                                                                                                                        |
| see above                                                                                                                                                                                                                                                                                                                                                                                                                                                                                                                                                                                                                                                                                                                                                                                                                                                                                                                                                                                                                                                                                                                                                                                                                                                                                                                                                                                                                                                                                                                                                                                                                                                                                                                                                                                                                                                                                                                                                                                                                                                                                                                                                                                                                                                                                                                                                                                                                                                                                                                                                                                                                                                                                                                                                                                                                                                                                                                                                                                                | Northumbria University / South Tees Hospitals NHS Foundation Trust / North Cumbria Integrated Care NHS Foundation Trust / North Tees and Hartlepool NHS Foundation Trust / Newcastle Hospitals NHS Foundation Trust | COVID-19 Genomics UK (COG-UK) Consortium                                   | Darren L Smith,Andrew Nelson,Matthew Bashton,Greg R Young,Joshua Loh,John Allan,Mohammad A Tariq,Giles S Holt,Gary Black,Wen C Yew,Lynn Dover,Paul Baker,Steve Liggett,Sarah Essex,Jane Greenaway,Debra Padgett,Clive Graham,Garren Scott,Edward Barton,Emma Swindells,Brendan Payne,Jennifer Collins,Yusri Taha,Gary Eltringham                                                                                                                       |
| EPI_ISL_1051450                                                                                                                                                                                                                                                                                                                                                                                                                                                                                                                                                                                                                                                                                                                                                                                                                                                                                                                                                                                                                                                                                                                                                                                                                                                                                                                                                                                                                                                                                                                                                                                                                                                                                                                                                                                                                                                                                                                                                                                                                                                                                                                                                                                                                                                                                                                                                                                                                                                                                                                                                                                                                                                                                                                                                                                                                                                                                                                                                                                          | Quadram Institute Bioscience                                                                                                                                                                                        | COVID-19 Genomics UK (COG-UK) Consortium                                   | Dave J. Baker, Gemma L. Kay, Alp Aydin, Thanh Le-Viet, Steven Rudder, Ana P. Tedim, Anastasia Kolyva, Maria Diaz, Leonardo de Oliveira Martins, Nabil-Fareed Alikhan, Lizzie Meadows, Rachael Stanley, Ngozi Elumogo, Muhammed Yasir, Nicholas M. Thomson, Alexander J Trotter, Rachel Gilroy, Samuel Bloomfield, Claire Stuart, Andrew Bell, Reenesh Prakash, Samir Devisevic, Alison E. Mark, John Wain, Mark Webber, Andrew J. Page, Justin O'Grady |
| EPI_ISL_1051789, EPI_ISL_1051791, EPI_ISL_1051792, EPI_ISL_1051810, EPI_ISL_1051811, EPI_ISL_1051812, EPI_ISL_1051828                                                                                                                                                                                                                                                                                                                                                                                                                                                                                                                                                                                                                                                                                                                                                                                                                                                                                                                                                                                                                                                                                                                                                                                                                                                                                                                                                                                                                                                                                                                                                                                                                                                                                                                                                                                                                                                                                                                                                                                                                                                                                                                                                                                                                                                                                                                                                                                                                                                                                                                                                                                                                                                                                                                                                                                                                                                                                    | Oxford Viromics, NDM, University of Oxford; Oxford University Hospitals; Basingstoke and North Hampshire Hospital                                                                                                   | COVID-19 Genomics UK (COG-UK) Consortium                                   | Tanya Golubchik, David Bonsall, George Macintyre, Amy Trebes, Mariateresa de Cesare, Catrin Moore, Alex Mobbs, Anita Justice, Robert Shaw, Monique Andersson, Timothy Peto, Emma Wise, Nathan Moore, Jessica Lynch, Nick Cortes, Matilde Mori, Stephen Kidd, David Buck, John Todd, Christophe Fraser                                                                                                                                                  |
| EPI_ISL_1054779, EPI_ISL_1054824                                                                                                                                                                                                                                                                                                                                                                                                                                                                                                                                                                                                                                                                                                                                                                                                                                                                                                                                                                                                                                                                                                                                                                                                                                                                                                                                                                                                                                                                                                                                                                                                                                                                                                                                                                                                                                                                                                                                                                                                                                                                                                                                                                                                                                                                                                                                                                                                                                                                                                                                                                                                                                                                                                                                                                                                                                                                                                                                                                         | Bioinformatics and Biostatistics Lab, Advanced Sequencing Facility                                                                                                                                                  | COVID-19 Genomics UK (COG-UK) Consortium                                   | Aengus Stewart,Jerome Nicod,Chelsea Sawyer,Laura Cubitt,Harshil Patel,Margaret Crawford                                                                                                                                                                                                                                                                                                                                                                |
| EPI_ISL_1103806                                                                                                                                                                                                                                                                                                                                                                                                                                                                                                                                                                                                                                                                                                                                                                                                                                                                                                                                                                                                                                                                                                                                                                                                                                                                                                                                                                                                                                                                                                                                                                                                                                                                                                                                                                                                                                                                                                                                                                                                                                                                                                                                                                                                                                                                                                                                                                                                                                                                                                                                                                                                                                                                                                                                                                                                                                                                                                                                                                                          | University of Exeter                                                                                                                                                                                                | COVID-19 Genomics UK (COG-UK) Consortium                                   | Ben Temperton,Aaron Jeffries,Michelle Michelsen,Joanna Warwick-Dugdale,Audrey Farbos,Robyn Manley,Stephen Michell,Jane Masoli                                                                                                                                                                                                                                                                                                                          |
| EPI_ISL_1104197, EPI_ISL_1104220, EPI_ISL_1104221, EPI_ISL_1104231, EPI_ISL_1104235, EPI_ISL_1104236, EPI_ISL_1104242, EPI_ISL_1104243                                                                                                                                                                                                                                                                                                                                                                                                                                                                                                                                                                                                                                                                                                                                                                                                                                                                                                                                                                                                                                                                                                                                                                                                                                                                                                                                                                                                                                                                                                                                                                                                                                                                                                                                                                                                                                                                                                                                                                                                                                                                                                                                                                                                                                                                                                                                                                                                                                                                                                                                                                                                                                                                                                                                                                                                                                                                   | Virology Department, Royal Infirmary of Edinburgh, NHS Lothian / School of Biological Sciences, University of Edinburgh                                                                                             | COVID-19 Genomics UK (COG-UK) Consortium                                   | McHugh M, Dewar R, Cotton S, Rooke S, O'Toole Á, Scher E, Hill V, McCrone JT, Colquhoun R, Yu X, Jackson B, Rambaut A, Templeton K                                                                                                                                                                                                                                                                                                                     |
| EPI_ISL_1104305                                                                                                                                                                                                                                                                                                                                                                                                                                                                                                                                                                                                                                                                                                                                                                                                                                                                                                                                                                                                                                                                                                                                                                                                                                                                                                                                                                                                                                                                                                                                                                                                                                                                                                                                                                                                                                                                                                                                                                                                                                                                                                                                                                                                                                                                                                                                                                                                                                                                                                                                                                                                                                                                                                                                                                                                                                                                                                                                                                                          | University Hospitals Of Leicester NHS Trust and DeepSeq Nottingham                                                                                                                                                  | COVID-19 Genomics UK (COG-UK) Consortium                                   | Christopher Holmes, Paul Bird, Thomas Helmer, Karlie Fallon, Julian Tang, Jonathan Ball, Patrick McClure, Joseph Chappell, Nadine Holmes, Matthew Carlisle, Christopher Moore, Fei Sang, Johnny Debebe, Victoria Wright, Matthew Loose                                                                                                                                                                                                                 |

|                                                                                                                                                                                                                                                                                                                                                                                                                                                                                                                                                                                                                                                                                                                                                                                                                                                                                                                                                                                                                                                                                                                                                                                                                                                                                                                                                                                                                                                                   |           |                                                                                                                                                                                                                     |                                          |                                                                                                                                                                                                                                                                                                                                                                                                                                                                                                                                                                                                                                                                                                            |
|-------------------------------------------------------------------------------------------------------------------------------------------------------------------------------------------------------------------------------------------------------------------------------------------------------------------------------------------------------------------------------------------------------------------------------------------------------------------------------------------------------------------------------------------------------------------------------------------------------------------------------------------------------------------------------------------------------------------------------------------------------------------------------------------------------------------------------------------------------------------------------------------------------------------------------------------------------------------------------------------------------------------------------------------------------------------------------------------------------------------------------------------------------------------------------------------------------------------------------------------------------------------------------------------------------------------------------------------------------------------------------------------------------------------------------------------------------------------|-----------|---------------------------------------------------------------------------------------------------------------------------------------------------------------------------------------------------------------------|------------------------------------------|------------------------------------------------------------------------------------------------------------------------------------------------------------------------------------------------------------------------------------------------------------------------------------------------------------------------------------------------------------------------------------------------------------------------------------------------------------------------------------------------------------------------------------------------------------------------------------------------------------------------------------------------------------------------------------------------------------|
| EPI_ISL_1104346, EPI_ISL_1104347, EPI_ISL_1104348, EPI_ISL_1104359, EPI_ISL_1104360, EPI_ISL_1104361, EPI_ISL_1104380, EPI_ISL_1104381, EPI_ISL_1104382, EPI_ISL_1104383, EPI_ISL_1104384                                                                                                                                                                                                                                                                                                                                                                                                                                                                                                                                                                                                                                                                                                                                                                                                                                                                                                                                                                                                                                                                                                                                                                                                                                                                         | see above | Liverpool Clinical Laboratories                                                                                                                                                                                     | COVID-19 Genomics UK (COG-UK) Consortium | Sam Haldenby, Anita Lucaci, Steve Paterson, Julian Hiscox, Alistair Darby, M Almsaud, A Alrezaihi, Muhannad Alruwaili, Stuart D Armstrong, Jones Benjamin, Eleanor G Bentley, Anu Chawla, Jordan J Clark, Angela Cowell, Richard Eccles, Isabel Garcia-Dorival, Matthew Gemmell, Alessandro Gerada, PKF Gilmore, Richard Gregory, Ximeng Han, Catherine Hartley, Margaret Hughes, Miren Iturriza-Gomara, James Johnson, L Luu, Jenifer Manson, Charlotte Nelson, Elaine O'Toole, Cassie Olateju, Rebekah Penrice-Randal , Lucille Rainbow, N.P Randle, Trevor Ian Robinson, Parul Sharma, Ghada T Shawli, James P Stewart, Neil Swainston, Ecaterina Vamos, Joanne Watts, Mark Whitehead                   |
| EPI_ISL_1105184, EPI_ISL_1105258, EPI_ISL_1105265, EPI_ISL_1105284, EPI_ISL_1105297, EPI_ISL_1105303                                                                                                                                                                                                                                                                                                                                                                                                                                                                                                                                                                                                                                                                                                                                                                                                                                                                                                                                                                                                                                                                                                                                                                                                                                                                                                                                                              |           | University College London Hospital                                                                                                                                                                                  | COVID-19 Genomics UK (COG-UK) Consortium | Judith Heaney, Matthew Byott, Catherine Houlihan, Dan Frampton, Stuart Kirk, Moira Spyer and Eleni Nastouli                                                                                                                                                                                                                                                                                                                                                                                                                                                                                                                                                                                                |
| EPI_ISL_1105658, EPI_ISL_1105659, EPI_ISL_1105660, EPI_ISL_1105661, EPI_ISL_1105662, EPI_ISL_1105663, EPI_ISL_1105664, EPI_ISL_1105665, EPI_ISL_1105666, EPI_ISL_1105667, EPI_ISL_1105668, EPI_ISL_1105669, EPI_ISL_1105670, EPI_ISL_1105671, EPI_ISL_1105672, EPI_ISL_1105673, EPI_ISL_1105674, EPI_ISL_1105675, EPI_ISL_1105676, EPI_ISL_1105677, EPI_ISL_1105678, EPI_ISL_1105679, EPI_ISL_1105680, EPI_ISL_1105681, EPI_ISL_1105682, EPI_ISL_1105683, EPI_ISL_1105684, EPI_ISL_1105685, EPI_ISL_1105686, EPI_ISL_1105687, EPI_ISL_1105688, EPI_ISL_1105689, EPI_ISL_1105691, EPI_ISL_1105692, EPI_ISL_1105693, EPI_ISL_1105694, EPI_ISL_1105695, EPI_ISL_1105696, EPI_ISL_1105697, EPI_ISL_1105698, EPI_ISL_1105699, EPI_ISL_1105700, EPI_ISL_1105701, EPI_ISL_1105702, EPI_ISL_1105703, EPI_ISL_1105704, EPI_ISL_1105705, EPI_ISL_1105707                                                                                                                                                                                                                                                                                                                                                                                                                                                                                                                                                                                                                    | see above | Northumbria University / South Tees Hospitals NHS Foundation Trust / North Cumbria Integrated Care NHS Foundation Trust / North Tees and Hartlepool NHS Foundation Trust / Newcastle Hospitals NHS Foundation Trust | COVID-19 Genomics UK (COG-UK) Consortium | Darren L Smith,Andrew Nelson,Matthew Bashton,Greg R Young,Joshua Loh,John Allan,Mohammad A Tariq,Giles S Holt,Gary Black,Wen C Yew,Lynn Dover,Paul Baker,Steve Liggett,Sarah Essex,Jane Greenaway,Debra Padgett,Clive Graham,Garren Scott,Edward Barton,Emma Swindells,Brendan Payne,Jennifer Collins,Yusri Taha,Gary Eltringham                                                                                                                                                                                                                                                                                                                                                                           |
| EPI_ISL_1107587, EPI_ISL_1107631                                                                                                                                                                                                                                                                                                                                                                                                                                                                                                                                                                                                                                                                                                                                                                                                                                                                                                                                                                                                                                                                                                                                                                                                                                                                                                                                                                                                                                  |           | Centre for Enzyme Innovation, University of Portsmouth / Translational Research Laboratory, Portsmouth Hospitals NHS Trust                                                                                          | COVID-19 Genomics UK (COG-UK) Consortium | Angela Beckett,Salman Goudarzi,Christopher Fearn,Kate Cook,Katie Loveson,Sharon Glaysheer,Scott Elliott,Samuel Robson                                                                                                                                                                                                                                                                                                                                                                                                                                                                                                                                                                                      |
| EPI_ISL_1177839, EPI_ISL_1177840, EPI_ISL_1177841, EPI_ISL_1177843, EPI_ISL_1177844, EPI_ISL_1177845, EPI_ISL_1177846, EPI_ISL_1177847, EPI_ISL_1177850, EPI_ISL_1177851, EPI_ISL_1177852, EPI_ISL_1177854, EPI_ISL_1177856, EPI_ISL_1177857, EPI_ISL_1177858, EPI_ISL_1177859, EPI_ISL_1177860, EPI_ISL_1177861, EPI_ISL_1177862, EPI_ISL_1177863, EPI_ISL_1177864, EPI_ISL_1177865, EPI_ISL_1177866, EPI_ISL_1177867, EPI_ISL_1177868, EPI_ISL_1177869, EPI_ISL_1177870, EPI_ISL_1177871, EPI_ISL_1177872, EPI_ISL_1177874, EPI_ISL_1177875, EPI_ISL_1177876, EPI_ISL_1177877                                                                                                                                                                                                                                                                                                                                                                                                                                                                                                                                                                                                                                                                                                                                                                                                                                                                                   | see above | Liverpool Clinical Laboratories                                                                                                                                                                                     | COVID-19 Genomics UK (COG-UK) Consortium | Sam Haldenby, Alistair Darby, Steve Paterson, Anita Lucaci, Julian Hiscox, M Almsaud, A Alrezaihi, Muhannad Alruwaili, Stuart D Armstrong, Jones Benjamin, Eleanor G Bentley, Anu Chawla, Jordan J Clark, Angela Cowell, Richard Eccles, Isabel Garcia-Dorival, Matthew Gemmell, Alessandro Gerada, PKF Gilmore, Richard Gregory, Ximeng Han, Catherine Hartley, Margaret Hughes, Miren Iturriza-Gomara, James Johnson, L Luu, Jenifer Manson, Charlotte Nelson, Elaine O'Toole, Cassie Olateju, Rebekah Penrice-Randal , Lucille Rainbow, N.P Randle, Trevor Ian Robinson, Parul Sharma, Ghada T Shawli, James P Stewart, Neil Swainston, Ecaterina Vamos, Joanne Watts, Mark Whitehead, Hermione Webster |
| EPI_ISL_1178326, EPI_ISL_1178327, EPI_ISL_1178328, EPI_ISL_1178329, EPI_ISL_1178330, EPI_ISL_1178331, EPI_ISL_1178332, EPI_ISL_1178333, EPI_ISL_1178336, EPI_ISL_1178337, EPI_ISL_1178338, EPI_ISL_1178339, EPI_ISL_1178340, EPI_ISL_1178341, EPI_ISL_1178342, EPI_ISL_1178343, EPI_ISL_1178344, EPI_ISL_1178345, EPI_ISL_1178346, EPI_ISL_1178347, EPI_ISL_1178348, EPI_ISL_1178349, EPI_ISL_1178350, EPI_ISL_1178351, EPI_ISL_1178352, EPI_ISL_1178353, EPI_ISL_1178354, EPI_ISL_1178355, EPI_ISL_1178356, EPI_ISL_1178357, EPI_ISL_1178358, EPI_ISL_1178359, EPI_ISL_1178360, EPI_ISL_1178361, EPI_ISL_1178362, EPI_ISL_1178363, EPI_ISL_1178364, EPI_ISL_1178365, EPI_ISL_1178366, EPI_ISL_1178367, EPI_ISL_1178368, EPI_ISL_1178369, EPI_ISL_1178370, EPI_ISL_1178371, EPI_ISL_1178372, EPI_ISL_1178373, EPI_ISL_1178374, EPI_ISL_1178375, EPI_ISL_1178376, EPI_ISL_1178377, EPI_ISL_1178378, EPI_ISL_1178379, EPI_ISL_1178380, EPI_ISL_1178381, EPI_ISL_1178382, EPI_ISL_1178383, EPI_ISL_1178384, EPI_ISL_1178385, EPI_ISL_1178386, EPI_ISL_1178387, EPI_ISL_1178388, EPI_ISL_1178389, EPI_ISL_1178390, EPI_ISL_1178391, EPI_ISL_1178392, EPI_ISL_1178393, EPI_ISL_1178394, EPI_ISL_1178395, EPI_ISL_1178396, EPI_ISL_1178397, EPI_ISL_1178398, EPI_ISL_1178400, EPI_ISL_1178401, EPI_ISL_1178402, EPI_ISL_1178403, EPI_ISL_1178404, EPI_ISL_1178405, EPI_ISL_1178406, EPI_ISL_1178417, EPI_ISL_1178418, EPI_ISL_1178419, EPI_ISL_1178420, EPI_ISL_1178421 | see above | Northumbria University / South Tees Hospitals NHS Foundation Trust / North Cumbria Integrated Care NHS Foundation Trust / North Tees and Hartlepool NHS Foundation Trust / Newcastle Hospitals NHS Foundation Trust | COVID-19 Genomics UK (COG-UK) Consortium | Darren L Smith,Andrew Nelson,Matthew Bashton,Greg R Young,Joshua Loh,John Allan,Mohammad A Tariq,Giles S Holt,Gary Black,Wen C Yew,Lynn Dover,Paul Baker,Steve Liggett,Sarah Essex,Jane Greenaway,Debra Padgett,Clive Graham,Garren Scott,Edward Barton,Emma Swindells,Brendan Payne,Jennifer Collins,Yusri Taha,Gary Eltringham                                                                                                                                                                                                                                                                                                                                                                           |
| EPI_ISL_1178430, EPI_ISL_1178431, EPI_ISL_1178432, EPI_ISL_1178442, EPI_ISL_1178443, EPI_ISL_1178446, EPI_ISL_1178454, EPI_ISL_1178476                                                                                                                                                                                                                                                                                                                                                                                                                                                                                                                                                                                                                                                                                                                                                                                                                                                                                                                                                                                                                                                                                                                                                                                                                                                                                                                            |           | Quadram Institute Bioscience                                                                                                                                                                                        | COVID-19 Genomics UK (COG-UK) Consortium | Dave J. Baker, Gemma L. Kay, Alp Aydin, Thanh Le-Viet, Steven Rudder, Ana P. Tedim, Anastasia Kolyva, Maria Diaz, Leonardo de Oliveira Martins, Nabil-Fareed Alikhan, Lizzie Meadows, Rachael Stanley, Ngozi Elumogo, Muhammed Yasir, Nicholas M. Thomson, Alexander J Trotter, Rachel Gilroy, Samuel Bloomfield, Claire Stuart, Andrew Bell, Reenesh Prakash, Samir Derवेशic, Alison E. Mather, John Wain, Mark Webber, Andrew J. Page, Justin O'Grady                                                                                                                                                                                                                                                    |
| EPI_ISL_1178721, EPI_ISL_1178822, EPI_ISL_1178847                                                                                                                                                                                                                                                                                                                                                                                                                                                                                                                                                                                                                                                                                                                                                                                                                                                                                                                                                                                                                                                                                                                                                                                                                                                                                                                                                                                                                 |           | Oxford Viromics, NDM, University of Oxford; Oxford University Hospitals; Basingstoke and North Hampshire Hospital                                                                                                   | COVID-19 Genomics UK (COG-UK) Consortium | Tanya Golubchik, David Bonsall, George Macintyre, Amy Trebes, Mariateresa de Cesare, Catrin Moore, Alex Mobbs, Anita Justice, Robert Shaw, Monique Andersson, Timothy Peto, Emma Wise, Nathan Moore, Jessica Lynch, Nick Cortes, Matilde Mori, Stephen Kidd, David Buck, John Todd, Christophe Fraser                                                                                                                                                                                                                                                                                                                                                                                                      |
| EPI_ISL_1179796, EPI_ISL_1179822, EPI_ISL_1179823, EPI_ISL_1179830, EPI_ISL_1179838                                                                                                                                                                                                                                                                                                                                                                                                                                                                                                                                                                                                                                                                                                                                                                                                                                                                                                                                                                                                                                                                                                                                                                                                                                                                                                                                                                               |           | Centre for Enzyme Innovation, University of Portsmouth / Translational Research Laboratory, Portsmouth Hospitals NHS Trust                                                                                          | COVID-19 Genomics UK (COG-UK) Consortium | Angela Beckett,Salman Goudarzi,Christopher Fearn,Kate Cook,Katie Loveson,Sharon Glaysheer,Scott Elliott,Samuel Robson                                                                                                                                                                                                                                                                                                                                                                                                                                                                                                                                                                                      |
| EPI_ISL_1180108, EPI_ISL_1180126                                                                                                                                                                                                                                                                                                                                                                                                                                                                                                                                                                                                                                                                                                                                                                                                                                                                                                                                                                                                                                                                                                                                                                                                                                                                                                                                                                                                                                  |           | Bioinformatics and Biostatistics Lab, Advanced Sequencing Facility                                                                                                                                                  | COVID-19 Genomics UK (COG-UK) Consortium | Aengus Stewart,Jerome Nicod,Chelsea Sawyer,Laura Cubitt,Harshil Patel,Margaret Crawford                                                                                                                                                                                                                                                                                                                                                                                                                                                                                                                                                                                                                    |
| EPI_ISL_1247594                                                                                                                                                                                                                                                                                                                                                                                                                                                                                                                                                                                                                                                                                                                                                                                                                                                                                                                                                                                                                                                                                                                                                                                                                                                                                                                                                                                                                                                   |           | Department of Pathology, University of Cambridge                                                                                                                                                                    | COVID-19 Genomics UK (COG-UK) Consortium | Aminu S. Jahun, Yasmin Chaudhry, Iliana Georgana, Myra Hosmillo, Rhys Izuagbe, William L. Hamilton, Martin D. Curran, Surendra Parmar, Ian Goodfellow                                                                                                                                                                                                                                                                                                                                                                                                                                                                                                                                                      |
| EPI_ISL_1248057, EPI_ISL_1248058, EPI_ISL_1248059, EPI_ISL_1248060, EPI_ISL_1248061, EPI_ISL_1248062, EPI_ISL_1248063, EPI_ISL_1248064, EPI_ISL_1248065, EPI_ISL_1248068, EPI_ISL_1248069, EPI_ISL_1248070, EPI_ISL_1248071, EPI_ISL_1248072, EPI_ISL_1248073, EPI_ISL_1248074, EPI_ISL_1248075, EPI_ISL_1248076, EPI_ISL_1248077, EPI_ISL_1248078, EPI_ISL_1248079, EPI_ISL_1248080, EPI_ISL_1248081, EPI_ISL_1248082, EPI_ISL_1248083, EPI_ISL_1248084, EPI_ISL_1248085, EPI_ISL_1248086, EPI_ISL_1248087, EPI_ISL_1248088, EPI_ISL_1248089, EPI_ISL_1248091, EPI_ISL_1248092, EPI_ISL_1248093, EPI_ISL_1248094, EPI_ISL_1248095, EPI_ISL_1248096, EPI_ISL_1248097, EPI_ISL_1248098, EPI_ISL_1248099, EPI_ISL_1248100, EPI_ISL_1248101, EPI_ISL_1248102, EPI_ISL_1248103, EPI_ISL_1248104, EPI_ISL_1248105, EPI_ISL_1248106, EPI_ISL_1248113, EPI_ISL_1248117, EPI_ISL_1248118, EPI_ISL_1248119, EPI_ISL_1248120, EPI_ISL_1248121                                                                                                                                                                                                                                                                                                                                                                                                                                                                                                                               | see above | University College London, Great Ormond Street Hospital for Children NHS Foundation Trust, Imperial College Healthcare NHS Trust                                                                                    | COVID-19 Genomics UK (COG-UK) Consortium | Sergi Castellano, Rachel Williams, Mark Kristiansen, Paola Resende Silva, Sunando Roy, Tony Brooks, Helena Tutili, Paola Niola, Patricia Dyal, Charlotte Williams, Leysa Forrest, Yasmin Panchbhaya, Jacqueline Findlay, Samuel Weeks, Julianne Brown, Kathryn Harris, Paul Randell, James Price, Alison Holmes, Judith Breuer                                                                                                                                                                                                                                                                                                                                                                             |
| EPI_ISL_1248374, EPI_ISL_1248375, EPI_ISL_1248384, EPI_ISL_1248385, EPI_ISL_1248389, EPI_ISL_1248395, EPI_ISL_1248396, EPI_ISL_1248397, EPI_ISL_1248407, EPI_ISL_1248408, EPI_ISL_1248409, EPI_ISL_1248418, EPI_ISL_1248419, EPI_ISL_1248428, EPI_ISL_1248429, EPI_ISL_1248440, EPI_ISL_1248441, EPI_ISL_1248467, EPI_ISL_1248487, EPI_ISL_1248495                                                                                                                                                                                                                                                                                                                                                                                                                                                                                                                                                                                                                                                                                                                                                                                                                                                                                                                                                                                                                                                                                                                | see above | University College London Hospital                                                                                                                                                                                  | COVID-19 Genomics UK (COG-UK) Consortium | Dr Judith Heaney, Matthew Byott, Dr Catherine Houlihan, Dr Daniel Frampton, Stuart Kirk, Dr Moira Spyer, Dr Paul Grant and Dr Eleni Nastouli                                                                                                                                                                                                                                                                                                                                                                                                                                                                                                                                                               |
| EPI_ISL_1249006, EPI_ISL_1249055, EPI_ISL_1249059                                                                                                                                                                                                                                                                                                                                                                                                                                                                                                                                                                                                                                                                                                                                                                                                                                                                                                                                                                                                                                                                                                                                                                                                                                                                                                                                                                                                                 |           | Quadram Institute Bioscience                                                                                                                                                                                        | COVID-19 Genomics UK (COG-UK) Consortium | Dave J. Baker, Gemma L. Kay, Alp Aydin, Thanh Le-Viet, Steven Rudder, Ana P. Tedim, Anastasia Kolyva, Maria Diaz, Leonardo de Oliveira Martins, Nabil-Fareed Alikhan, Lizzie Meadows, Rachael Stanley, Ngozi Elumogo, Muhammed Yasir, Nicholas M. Thomson, Alexander J Trotter, Rachel Gilroy, Samuel Bloomfield, Claire Stuart, Andrew Bell, Reenesh Prakash, Samir Derवेशic, Alison E. Mather, John Wain, Mark Webber, Andrew J. Page, Justin O'Grady                                                                                                                                                                                                                                                    |
| EPI_ISL_1249226                                                                                                                                                                                                                                                                                                                                                                                                                                                                                                                                                                                                                                                                                                                                                                                                                                                                                                                                                                                                                                                                                                                                                                                                                                                                                                                                                                                                                                                   |           | Oxford Viromics, NDM, University of Oxford; Oxford University Hospitals; Basingstoke and North Hampshire Hospital                                                                                                   | COVID-19 Genomics UK (COG-UK) Consortium | Tanya Golubchik, David Bonsall, George Macintyre, Amy Trebes, Mariateresa de Cesare, Catrin Moore, Alex Mobbs, Anita Justice, Robert Shaw, Monique Andersson, Timothy Peto, Emma Wise, Nathan Moore, Jessica Lynch, Nick Cortes, Matilde Mori, Stephen Kidd, David Buck, John Todd, Christophe Fraser                                                                                                                                                                                                                                                                                                                                                                                                      |
| EPI_ISL_1249959                                                                                                                                                                                                                                                                                                                                                                                                                                                                                                                                                                                                                                                                                                                                                                                                                                                                                                                                                                                                                                                                                                                                                                                                                                                                                                                                                                                                                                                   |           | Centre for Enzyme Innovation, University of Portsmouth / Translational Research Laboratory, Portsmouth Hospitals NHS Trust                                                                                          | COVID-19 Genomics UK (COG-UK) Consortium | Angela Beckett,Salman Goudarzi,Christopher Fearn,Kate Cook,Katie Loveson,Sharon Glaysheer,Scott Elliott,Samuel Robson                                                                                                                                                                                                                                                                                                                                                                                                                                                                                                                                                                                      |
| EPI_ISL_1296505, EPI_ISL_1296506, EPI_ISL_1296507, EPI_ISL_1296509, EPI_ISL_1296510, EPI_ISL_1296511, EPI_ISL_1296512, EPI_ISL_1296513, EPI_ISL_1296514, EPI_ISL_1296515, EPI_ISL_1296516, EPI_ISL_1296517, EPI_ISL_1296518, EPI_ISL_1296519, EPI_ISL_1296520, EPI_ISL_1296521, EPI_ISL_1296522, EPI_ISL_1296523, EPI_ISL_1296525, EPI_ISL_1296526, EPI_ISL_1296527, EPI_ISL_1296530, EPI_ISL_1296531, EPI_ISL_1296532, EPI_ISL_1296536, EPI_ISL_1296537, EPI_ISL_1296549                                                                                                                                                                                                                                                                                                                                                                                                                                                                                                                                                                                                                                                                                                                                                                                                                                                                                                                                                                                         | see above | Respiratory Virus Unit, National Infection Service, Public Health England                                                                                                                                           | COVID-19 Genomics UK (COG-UK) Consortium | PHE Covid Sequencing Team                                                                                                                                                                                                                                                                                                                                                                                                                                                                                                                                                                                                                                                                                  |
| EPI_ISL_1308583, EPI_ISL_1308584                                                                                                                                                                                                                                                                                                                                                                                                                                                                                                                                                                                                                                                                                                                                                                                                                                                                                                                                                                                                                                                                                                                                                                                                                                                                                                                                                                                                                                  |           | University of Exeter                                                                                                                                                                                                | COVID-19 Genomics UK (COG-UK) Consortium | Ben Temperton,Aaron Jeffries,Michelle Michelsen,Joanna Warwick-Dugdale,Audrey Farbos,Robyn Manley,Stephen Michell,Jane Masoli                                                                                                                                                                                                                                                                                                                                                                                                                                                                                                                                                                              |
| EPI_ISL_1308703, EPI_ISL_1308704, EPI_ISL_1308705, EPI_ISL_1308838, EPI_ISL_1308839, EPI_ISL_1308842, EPI_ISL_1308843                                                                                                                                                                                                                                                                                                                                                                                                                                                                                                                                                                                                                                                                                                                                                                                                                                                                                                                                                                                                                                                                                                                                                                                                                                                                                                                                             |           | Virology Department, Royal Infirmary of Edinburgh, NHS Lothian / School of Biological Sciences, University of Edinburgh                                                                                             | COVID-19 Genomics UK (COG-UK) Consortium | McHugh M, Dewar R, Cotton S, Rooke S, O'Toole Á, Scher E, Hill V, McCrone JT, Colquhoun R, Yu X, Jackson B, Rambaut A, Templeton K                                                                                                                                                                                                                                                                                                                                                                                                                                                                                                                                                                         |

|                                                                                                                                                                                                                                                                                                                                                                                                                                                                                                                                                                                                                                                                                                                                                                                                                                                                                                                                                                                                                                                                                                                                                                                                                                                                                                                                                                                                                                                                                                                                                                                                                                                                                                                                                                                                                                                                                                                                                                                                                                                                                                                                                                                                                                                                                                                                                                                                                                                                                                                                                                                                                                                                                                                                                                                                                                                                                                                                                                                                                                                                                                                                                                                                                                                                                                                                                                                                                                                                                                                                                                                                                                                                                                                                                                                                                                                                                                                                                                                                                                                                                                                                                                                                                                                                                                                                                                                                                                                                                                                                                                                                                                                                                                                                                                                                                                                                                                                                                                                                                                                                                                                                                                                                                                                                                                                                                                                                                                                                                                                                                                                                                                                                                                                                                                |                                                                                                                                                                                                                     |                                                                            |                                                                                                                                                                                                                                                                                                                                                                          |
|----------------------------------------------------------------------------------------------------------------------------------------------------------------------------------------------------------------------------------------------------------------------------------------------------------------------------------------------------------------------------------------------------------------------------------------------------------------------------------------------------------------------------------------------------------------------------------------------------------------------------------------------------------------------------------------------------------------------------------------------------------------------------------------------------------------------------------------------------------------------------------------------------------------------------------------------------------------------------------------------------------------------------------------------------------------------------------------------------------------------------------------------------------------------------------------------------------------------------------------------------------------------------------------------------------------------------------------------------------------------------------------------------------------------------------------------------------------------------------------------------------------------------------------------------------------------------------------------------------------------------------------------------------------------------------------------------------------------------------------------------------------------------------------------------------------------------------------------------------------------------------------------------------------------------------------------------------------------------------------------------------------------------------------------------------------------------------------------------------------------------------------------------------------------------------------------------------------------------------------------------------------------------------------------------------------------------------------------------------------------------------------------------------------------------------------------------------------------------------------------------------------------------------------------------------------------------------------------------------------------------------------------------------------------------------------------------------------------------------------------------------------------------------------------------------------------------------------------------------------------------------------------------------------------------------------------------------------------------------------------------------------------------------------------------------------------------------------------------------------------------------------------------------------------------------------------------------------------------------------------------------------------------------------------------------------------------------------------------------------------------------------------------------------------------------------------------------------------------------------------------------------------------------------------------------------------------------------------------------------------------------------------------------------------------------------------------------------------------------------------------------------------------------------------------------------------------------------------------------------------------------------------------------------------------------------------------------------------------------------------------------------------------------------------------------------------------------------------------------------------------------------------------------------------------------------------------------------------------------------------------------------------------------------------------------------------------------------------------------------------------------------------------------------------------------------------------------------------------------------------------------------------------------------------------------------------------------------------------------------------------------------------------------------------------------------------------------------------------------------------------------------------------------------------------------------------------------------------------------------------------------------------------------------------------------------------------------------------------------------------------------------------------------------------------------------------------------------------------------------------------------------------------------------------------------------------------------------------------------------------------------------------------------------------------------------------------------------------------------------------------------------------------------------------------------------------------------------------------------------------------------------------------------------------------------------------------------------------------------------------------------------------------------------------------------------------------------------------------------------------------------------|---------------------------------------------------------------------------------------------------------------------------------------------------------------------------------------------------------------------|----------------------------------------------------------------------------|--------------------------------------------------------------------------------------------------------------------------------------------------------------------------------------------------------------------------------------------------------------------------------------------------------------------------------------------------------------------------|
| EPI_ISL_1309037, EPI_ISL_1309045, EPI_ISL_1309050, EPI_ISL_1309057, EPI_ISL_1309064, EPI_ISL_1309065, EPI_ISL_1309069, EPI_ISL_1309075, EPI_ISL_1309083, EPI_ISL_1309086, EPI_ISL_1309087, EPI_ISL_1309088, EPI_ISL_1309098, EPI_ISL_1309102, EPI_ISL_1309107, EPI_ISL_1309111                                                                                                                                                                                                                                                                                                                                                                                                                                                                                                                                                                                                                                                                                                                                                                                                                                                                                                                                                                                                                                                                                                                                                                                                                                                                                                                                                                                                                                                                                                                                                                                                                                                                                                                                                                                                                                                                                                                                                                                                                                                                                                                                                                                                                                                                                                                                                                                                                                                                                                                                                                                                                                                                                                                                                                                                                                                                                                                                                                                                                                                                                                                                                                                                                                                                                                                                                                                                                                                                                                                                                                                                                                                                                                                                                                                                                                                                                                                                                                                                                                                                                                                                                                                                                                                                                                                                                                                                                                                                                                                                                                                                                                                                                                                                                                                                                                                                                                                                                                                                                                                                                                                                                                                                                                                                                                                                                                                                                                                                                 |                                                                                                                                                                                                                     |                                                                            |                                                                                                                                                                                                                                                                                                                                                                          |
| see above                                                                                                                                                                                                                                                                                                                                                                                                                                                                                                                                                                                                                                                                                                                                                                                                                                                                                                                                                                                                                                                                                                                                                                                                                                                                                                                                                                                                                                                                                                                                                                                                                                                                                                                                                                                                                                                                                                                                                                                                                                                                                                                                                                                                                                                                                                                                                                                                                                                                                                                                                                                                                                                                                                                                                                                                                                                                                                                                                                                                                                                                                                                                                                                                                                                                                                                                                                                                                                                                                                                                                                                                                                                                                                                                                                                                                                                                                                                                                                                                                                                                                                                                                                                                                                                                                                                                                                                                                                                                                                                                                                                                                                                                                                                                                                                                                                                                                                                                                                                                                                                                                                                                                                                                                                                                                                                                                                                                                                                                                                                                                                                                                                                                                                                                                      | University College London, Great Ormond Street Hospital for Children NHS Foundation Trust, Imperial College Healthcare NHS Trust                                                                                    | COVID-19 Genomics UK (COG-UK) Consortium                                   | Sergi Castellano, Rachel Williams, Mark Kristiansen, Paola Resende Silva, Sunando Roy, Tony Brooks, Helena Tutili, Paola Niola, Patricia Dyal, Charlotte Williams, Leysa Forrest, Yasmin Panchbhaya, Jacqueline Findlay, Samuel Weeks, Julianne Brown, Kathryn Harris, Paul Randell, James Price, Alison Holmes, Judith Breuer                                           |
| EPI_ISL_1309745, EPI_ISL_1309746, EPI_ISL_1309747                                                                                                                                                                                                                                                                                                                                                                                                                                                                                                                                                                                                                                                                                                                                                                                                                                                                                                                                                                                                                                                                                                                                                                                                                                                                                                                                                                                                                                                                                                                                                                                                                                                                                                                                                                                                                                                                                                                                                                                                                                                                                                                                                                                                                                                                                                                                                                                                                                                                                                                                                                                                                                                                                                                                                                                                                                                                                                                                                                                                                                                                                                                                                                                                                                                                                                                                                                                                                                                                                                                                                                                                                                                                                                                                                                                                                                                                                                                                                                                                                                                                                                                                                                                                                                                                                                                                                                                                                                                                                                                                                                                                                                                                                                                                                                                                                                                                                                                                                                                                                                                                                                                                                                                                                                                                                                                                                                                                                                                                                                                                                                                                                                                                                                              | Oxford Viromics, NDM, University of Oxford; Oxford University Hospitals; Basingstoke and North Hampshire Hospital                                                                                                   | COVID-19 Genomics UK (COG-UK) Consortium                                   | Tanya Golubchik, David Bonsall, George Macintyre, Amy Trebes, Mariateresa de Cesare, Catrin Moore, Alex Mobbs, Anita Justice, Robert Shaw, Monique Andersson, Timothy Peto, Emma Wise, Nathan Moore, Jessica Lynch, Nick Cortes, Matilde Mori, Stephen Kidd, David Buck, John Todd, Christophe Fraser                                                                    |
| EPI_ISL_1346482                                                                                                                                                                                                                                                                                                                                                                                                                                                                                                                                                                                                                                                                                                                                                                                                                                                                                                                                                                                                                                                                                                                                                                                                                                                                                                                                                                                                                                                                                                                                                                                                                                                                                                                                                                                                                                                                                                                                                                                                                                                                                                                                                                                                                                                                                                                                                                                                                                                                                                                                                                                                                                                                                                                                                                                                                                                                                                                                                                                                                                                                                                                                                                                                                                                                                                                                                                                                                                                                                                                                                                                                                                                                                                                                                                                                                                                                                                                                                                                                                                                                                                                                                                                                                                                                                                                                                                                                                                                                                                                                                                                                                                                                                                                                                                                                                                                                                                                                                                                                                                                                                                                                                                                                                                                                                                                                                                                                                                                                                                                                                                                                                                                                                                                                                | Lighthouse Lab in Alderley Park                                                                                                                                                                                     | Wellcome Sanger Institute for the COVID-19 Genomics UK (COG-UK) Consortium | Jacquelyn Wynn, Mairead Hyland, The Lighthouse Lab in Alderley Park and Alex Alderton, Roberto Amato, Jeffrey Barrett, Sonia Goncalves, Ewan Harrison, David K. Jackson, Ian Johnston, Dominic Kwiatkowski, Cordelia Langford, John Sillitoe on behalf of the Wellcome Sanger Institute COVID-19 Surveillance Team                                                       |
| EPI_ISL_1346483                                                                                                                                                                                                                                                                                                                                                                                                                                                                                                                                                                                                                                                                                                                                                                                                                                                                                                                                                                                                                                                                                                                                                                                                                                                                                                                                                                                                                                                                                                                                                                                                                                                                                                                                                                                                                                                                                                                                                                                                                                                                                                                                                                                                                                                                                                                                                                                                                                                                                                                                                                                                                                                                                                                                                                                                                                                                                                                                                                                                                                                                                                                                                                                                                                                                                                                                                                                                                                                                                                                                                                                                                                                                                                                                                                                                                                                                                                                                                                                                                                                                                                                                                                                                                                                                                                                                                                                                                                                                                                                                                                                                                                                                                                                                                                                                                                                                                                                                                                                                                                                                                                                                                                                                                                                                                                                                                                                                                                                                                                                                                                                                                                                                                                                                                | Lighthouse Lab in Milton Keynes                                                                                                                                                                                     | Wellcome Sanger Institute for the COVID-19 Genomics UK (COG-UK) Consortium | The Lighthouse Lab in Milton Keynes and Alex Alderton, Roberto Amato, Jeffrey Barrett, Sonia Goncalves, Ewan Harrison, David K. Jackson, Ian Johnston, Dominic Kwiatkowski, Cordelia Langford, John Sillitoe on behalf of the Wellcome Sanger Institute COVID-19 Surveillance Team                                                                                       |
| EPI_ISL_1386858, EPI_ISL_1386876, EPI_ISL_1386881, EPI_ISL_1386886, EPI_ISL_1386889, EPI_ISL_1386896, EPI_ISL_1386912, EPI_ISL_1386913                                                                                                                                                                                                                                                                                                                                                                                                                                                                                                                                                                                                                                                                                                                                                                                                                                                                                                                                                                                                                                                                                                                                                                                                                                                                                                                                                                                                                                                                                                                                                                                                                                                                                                                                                                                                                                                                                                                                                                                                                                                                                                                                                                                                                                                                                                                                                                                                                                                                                                                                                                                                                                                                                                                                                                                                                                                                                                                                                                                                                                                                                                                                                                                                                                                                                                                                                                                                                                                                                                                                                                                                                                                                                                                                                                                                                                                                                                                                                                                                                                                                                                                                                                                                                                                                                                                                                                                                                                                                                                                                                                                                                                                                                                                                                                                                                                                                                                                                                                                                                                                                                                                                                                                                                                                                                                                                                                                                                                                                                                                                                                                                                         | University College London, Great Ormond Street Hospital for Children NHS Foundation Trust, Imperial College Healthcare NHS Trust                                                                                    | COVID-19 Genomics UK (COG-UK) Consortium                                   | Sergi Castellano, Rachel Williams, Mark Kristiansen, Paola Resende Silva, Sunando Roy, Tony Brooks, Helena Tutili, Paola Niola, Patricia Dyal, Charlotte Williams, Leysa Forrest, Yasmin Panchbhaya, Jacqueline Findlay, Samuel Weeks, Julianne Brown, Kathryn Harris, Paul Randell, James Price, Alison Holmes, Judith Breuer                                           |
| EPI_ISL_1387095                                                                                                                                                                                                                                                                                                                                                                                                                                                                                                                                                                                                                                                                                                                                                                                                                                                                                                                                                                                                                                                                                                                                                                                                                                                                                                                                                                                                                                                                                                                                                                                                                                                                                                                                                                                                                                                                                                                                                                                                                                                                                                                                                                                                                                                                                                                                                                                                                                                                                                                                                                                                                                                                                                                                                                                                                                                                                                                                                                                                                                                                                                                                                                                                                                                                                                                                                                                                                                                                                                                                                                                                                                                                                                                                                                                                                                                                                                                                                                                                                                                                                                                                                                                                                                                                                                                                                                                                                                                                                                                                                                                                                                                                                                                                                                                                                                                                                                                                                                                                                                                                                                                                                                                                                                                                                                                                                                                                                                                                                                                                                                                                                                                                                                                                                | Northumbria University / South Tees Hospitals NHS Foundation Trust / North Cumbria Integrated Care NHS Foundation Trust / North Tees and Hartlepool NHS Foundation Trust / Newcastle Hospitals NHS Foundation Trust | COVID-19 Genomics UK (COG-UK) Consortium                                   | Darren L Smith,Andrew Nelson,Matthew Bashton,Greg R Young,Joshua Loh,John Allan,Mohammad A Tariq,Giles S Holt,Gary Black,Wen C Yew,Lynn Dover,Paul Baker,Steve Liggett,Sarah Essex,Jane Greenaway,Debra Padgett,Clive Graham,Garren Scott,Edward Barton,Emma Swindells,Brendan Payne,Jennifer Collins,Yusri Taha,Gary Eltringham                                         |
| EPI_ISL_1474961, EPI_ISL_1474962, EPI_ISL_1474965, EPI_ISL_1474966, EPI_ISL_1474967, EPI_ISL_1474968, EPI_ISL_1474969, EPI_ISL_1474970, EPI_ISL_1474971, EPI_ISL_1474972, EPI_ISL_1474974, EPI_ISL_1474975, EPI_ISL_1474976, EPI_ISL_1474977, EPI_ISL_1474978, EPI_ISL_1474979, EPI_ISL_1474980, EPI_ISL_1474981, EPI_ISL_1474982, EPI_ISL_1474984, EPI_ISL_1474985, EPI_ISL_1474991, EPI_ISL_1474992, EPI_ISL_1474993, EPI_ISL_1474994, EPI_ISL_1475004, EPI_ISL_1475005, EPI_ISL_1475006, EPI_ISL_1475082                                                                                                                                                                                                                                                                                                                                                                                                                                                                                                                                                                                                                                                                                                                                                                                                                                                                                                                                                                                                                                                                                                                                                                                                                                                                                                                                                                                                                                                                                                                                                                                                                                                                                                                                                                                                                                                                                                                                                                                                                                                                                                                                                                                                                                                                                                                                                                                                                                                                                                                                                                                                                                                                                                                                                                                                                                                                                                                                                                                                                                                                                                                                                                                                                                                                                                                                                                                                                                                                                                                                                                                                                                                                                                                                                                                                                                                                                                                                                                                                                                                                                                                                                                                                                                                                                                                                                                                                                                                                                                                                                                                                                                                                                                                                                                                                                                                                                                                                                                                                                                                                                                                                                                                                                                                    |                                                                                                                                                                                                                     |                                                                            |                                                                                                                                                                                                                                                                                                                                                                          |
| see above                                                                                                                                                                                                                                                                                                                                                                                                                                                                                                                                                                                                                                                                                                                                                                                                                                                                                                                                                                                                                                                                                                                                                                                                                                                                                                                                                                                                                                                                                                                                                                                                                                                                                                                                                                                                                                                                                                                                                                                                                                                                                                                                                                                                                                                                                                                                                                                                                                                                                                                                                                                                                                                                                                                                                                                                                                                                                                                                                                                                                                                                                                                                                                                                                                                                                                                                                                                                                                                                                                                                                                                                                                                                                                                                                                                                                                                                                                                                                                                                                                                                                                                                                                                                                                                                                                                                                                                                                                                                                                                                                                                                                                                                                                                                                                                                                                                                                                                                                                                                                                                                                                                                                                                                                                                                                                                                                                                                                                                                                                                                                                                                                                                                                                                                                      | Regional Virus Laboratory, Belfast Health and Social Care Trust                                                                                                                                                     | COVID-19 Genomics UK (COG-UK) Consortium                                   | Conall McCaughey, James McKenna, Tanya Curran, Susan Feeney, Alison Watt, Ciara Cox, Mairead Connor, Zoltan Molnar, David Simpson, Derek Fairley                                                                                                                                                                                                                         |
| EPI_ISL_1476085, EPI_ISL_1476095, EPI_ISL_1476101, EPI_ISL_1476236, EPI_ISL_1476237, EPI_ISL_1476238, EPI_ISL_1476239, EPI_ISL_1476240, EPI_ISL_1476241, EPI_ISL_1476242, EPI_ISL_1476247, EPI_ISL_1476522, EPI_ISL_1476523, EPI_ISL_1476524, EPI_ISL_1476525, EPI_ISL_1476527, EPI_ISL_1476534, EPI_ISL_1476535, EPI_ISL_1476540, EPI_ISL_1476544, EPI_ISL_1476545, EPI_ISL_1476546, EPI_ISL_1476548                                                                                                                                                                                                                                                                                                                                                                                                                                                                                                                                                                                                                                                                                                                                                                                                                                                                                                                                                                                                                                                                                                                                                                                                                                                                                                                                                                                                                                                                                                                                                                                                                                                                                                                                                                                                                                                                                                                                                                                                                                                                                                                                                                                                                                                                                                                                                                                                                                                                                                                                                                                                                                                                                                                                                                                                                                                                                                                                                                                                                                                                                                                                                                                                                                                                                                                                                                                                                                                                                                                                                                                                                                                                                                                                                                                                                                                                                                                                                                                                                                                                                                                                                                                                                                                                                                                                                                                                                                                                                                                                                                                                                                                                                                                                                                                                                                                                                                                                                                                                                                                                                                                                                                                                                                                                                                                                                          |                                                                                                                                                                                                                     |                                                                            |                                                                                                                                                                                                                                                                                                                                                                          |
| see above                                                                                                                                                                                                                                                                                                                                                                                                                                                                                                                                                                                                                                                                                                                                                                                                                                                                                                                                                                                                                                                                                                                                                                                                                                                                                                                                                                                                                                                                                                                                                                                                                                                                                                                                                                                                                                                                                                                                                                                                                                                                                                                                                                                                                                                                                                                                                                                                                                                                                                                                                                                                                                                                                                                                                                                                                                                                                                                                                                                                                                                                                                                                                                                                                                                                                                                                                                                                                                                                                                                                                                                                                                                                                                                                                                                                                                                                                                                                                                                                                                                                                                                                                                                                                                                                                                                                                                                                                                                                                                                                                                                                                                                                                                                                                                                                                                                                                                                                                                                                                                                                                                                                                                                                                                                                                                                                                                                                                                                                                                                                                                                                                                                                                                                                                      | Originating lab: Wales Specialist Virology Centre Sequencing lab: Pathogen Genomics Unit                                                                                                                            | Public Health Wales Microbiology Cardiff Wales Specialist Virology Centre  | Catherine Moore, Johnathan Evans, Laura Gifford, Malorie Perry, Simon Cottrell, Angela Marchbank, Alec Birchley, Alexander Adams, Amy Gaskin, Bree Gatica-Wilcox, Jason Coombes, Joel Southgate, Lauren Gilbert, Lee Graham, Nicole Pacchiarini, Sara Kumziene-Summerhayes, Sarah Taylor, Sophie Jones, Sara Rey, Matthew Bull, Joanne Watkins, Sally Corden, Tom Connor |
| EPI_ISL_1476665                                                                                                                                                                                                                                                                                                                                                                                                                                                                                                                                                                                                                                                                                                                                                                                                                                                                                                                                                                                                                                                                                                                                                                                                                                                                                                                                                                                                                                                                                                                                                                                                                                                                                                                                                                                                                                                                                                                                                                                                                                                                                                                                                                                                                                                                                                                                                                                                                                                                                                                                                                                                                                                                                                                                                                                                                                                                                                                                                                                                                                                                                                                                                                                                                                                                                                                                                                                                                                                                                                                                                                                                                                                                                                                                                                                                                                                                                                                                                                                                                                                                                                                                                                                                                                                                                                                                                                                                                                                                                                                                                                                                                                                                                                                                                                                                                                                                                                                                                                                                                                                                                                                                                                                                                                                                                                                                                                                                                                                                                                                                                                                                                                                                                                                                                | Centre for Enzyme Innovation, University of Portsmouth / Translational Research Laboratory, Portsmouth Hospitals NHS Trust                                                                                          | COVID-19 Genomics UK (COG-UK) Consortium                                   | Angela Beckett,Salman Goudarzi,Christopher Fearn,Kate Cook,Katie Loveson,Sharon Glaysher,Scott Elliott,Samuel Robson                                                                                                                                                                                                                                                     |
| EPI_ISL_804369, EPI_ISL_811123, EPI_ISL_811124, EPI_ISL_811125, EPI_ISL_811126, EPI_ISL_811150, EPI_ISL_825491, EPI_ISL_825550, EPI_ISL_825551, EPI_ISL_825573, EPI_ISL_825574, EPI_ISL_825616, EPI_ISL_826282                                                                                                                                                                                                                                                                                                                                                                                                                                                                                                                                                                                                                                                                                                                                                                                                                                                                                                                                                                                                                                                                                                                                                                                                                                                                                                                                                                                                                                                                                                                                                                                                                                                                                                                                                                                                                                                                                                                                                                                                                                                                                                                                                                                                                                                                                                                                                                                                                                                                                                                                                                                                                                                                                                                                                                                                                                                                                                                                                                                                                                                                                                                                                                                                                                                                                                                                                                                                                                                                                                                                                                                                                                                                                                                                                                                                                                                                                                                                                                                                                                                                                                                                                                                                                                                                                                                                                                                                                                                                                                                                                                                                                                                                                                                                                                                                                                                                                                                                                                                                                                                                                                                                                                                                                                                                                                                                                                                                                                                                                                                                                 |                                                                                                                                                                                                                     |                                                                            |                                                                                                                                                                                                                                                                                                                                                                          |
| see above                                                                                                                                                                                                                                                                                                                                                                                                                                                                                                                                                                                                                                                                                                                                                                                                                                                                                                                                                                                                                                                                                                                                                                                                                                                                                                                                                                                                                                                                                                                                                                                                                                                                                                                                                                                                                                                                                                                                                                                                                                                                                                                                                                                                                                                                                                                                                                                                                                                                                                                                                                                                                                                                                                                                                                                                                                                                                                                                                                                                                                                                                                                                                                                                                                                                                                                                                                                                                                                                                                                                                                                                                                                                                                                                                                                                                                                                                                                                                                                                                                                                                                                                                                                                                                                                                                                                                                                                                                                                                                                                                                                                                                                                                                                                                                                                                                                                                                                                                                                                                                                                                                                                                                                                                                                                                                                                                                                                                                                                                                                                                                                                                                                                                                                                                      | Respiratory Virus Unit, National Infection Service, Public Health England                                                                                                                                           | COVID-19 Genomics UK (COG-UK) Consortium                                   | PHE Covid Sequencing Team                                                                                                                                                                                                                                                                                                                                                |
| EPI_ISL_833585, EPI_ISL_833587, EPI_ISL_833588, EPI_ISL_833589, EPI_ISL_833591, EPI_ISL_833592, EPI_ISL_833594, EPI_ISL_833595, EPI_ISL_833598, EPI_ISL_833600, EPI_ISL_833601, EPI_ISL_833603, EPI_ISL_833605, EPI_ISL_833608, EPI_ISL_833609, EPI_ISL_833610, EPI_ISL_833613, EPI_ISL_833616, EPI_ISL_833622, EPI_ISL_833623, EPI_ISL_833624, EPI_ISL_833625, EPI_ISL_833627, EPI_ISL_833628, EPI_ISL_833633, EPI_ISL_833635, EPI_ISL_833636, EPI_ISL_833637, EPI_ISL_833638, EPI_ISL_833639, EPI_ISL_833640, EPI_ISL_833641, EPI_ISL_833642, EPI_ISL_833644, EPI_ISL_833645, EPI_ISL_833646, EPI_ISL_833649, EPI_ISL_833650, EPI_ISL_833651, EPI_ISL_833653, EPI_ISL_833657, EPI_ISL_833659, EPI_ISL_833660, EPI_ISL_833661, EPI_ISL_833663, EPI_ISL_833664, EPI_ISL_833665, EPI_ISL_833666, EPI_ISL_833668, EPI_ISL_833669, EPI_ISL_833670, EPI_ISL_833672, EPI_ISL_833673, EPI_ISL_833674, EPI_ISL_833675, EPI_ISL_833677, EPI_ISL_833681, EPI_ISL_833682, EPI_ISL_833684, EPI_ISL_833686, EPI_ISL_833687, EPI_ISL_833688, EPI_ISL_833689, EPI_ISL_833690, EPI_ISL_833691, EPI_ISL_833692, EPI_ISL_833694, EPI_ISL_833695, EPI_ISL_833696, EPI_ISL_833697, EPI_ISL_833698, EPI_ISL_833699, EPI_ISL_833701, EPI_ISL_833702, EPI_ISL_833703, EPI_ISL_833704, EPI_ISL_833705, EPI_ISL_833706, EPI_ISL_833708, EPI_ISL_833709, EPI_ISL_833710, EPI_ISL_833711, EPI_ISL_833713, EPI_ISL_833714, EPI_ISL_833715, EPI_ISL_833717, EPI_ISL_833718, EPI_ISL_833720, EPI_ISL_833722, EPI_ISL_833723, EPI_ISL_833724, EPI_ISL_833727, EPI_ISL_833728, EPI_ISL_833729, EPI_ISL_833730, EPI_ISL_833731, EPI_ISL_833732, EPI_ISL_833733, EPI_ISL_833737, EPI_ISL_833739, EPI_ISL_833740, EPI_ISL_833741, EPI_ISL_833742, EPI_ISL_833744, EPI_ISL_833745, EPI_ISL_833747, EPI_ISL_833748, EPI_ISL_833749, EPI_ISL_833750, EPI_ISL_833751, EPI_ISL_833752, EPI_ISL_833753, EPI_ISL_833754, EPI_ISL_833757, EPI_ISL_833758, EPI_ISL_833760, EPI_ISL_833761, EPI_ISL_833762, EPI_ISL_833763, EPI_ISL_833764, EPI_ISL_833765, EPI_ISL_833769, EPI_ISL_833771, EPI_ISL_833772, EPI_ISL_833773, EPI_ISL_833774, EPI_ISL_833775, EPI_ISL_833776, EPI_ISL_833777, EPI_ISL_833778, EPI_ISL_833781, EPI_ISL_833782, EPI_ISL_833783, EPI_ISL_833784, EPI_ISL_833785, EPI_ISL_833786, EPI_ISL_833787, EPI_ISL_833788, EPI_ISL_833790, EPI_ISL_833792, EPI_ISL_833793, EPI_ISL_833794, EPI_ISL_833798, EPI_ISL_833799, EPI_ISL_833800, EPI_ISL_833802, EPI_ISL_833805, EPI_ISL_833806, EPI_ISL_833807, EPI_ISL_833808, EPI_ISL_833810, EPI_ISL_833811, EPI_ISL_833812, EPI_ISL_833813, EPI_ISL_833815, EPI_ISL_833816, EPI_ISL_833819, EPI_ISL_833820, EPI_ISL_833822, EPI_ISL_833824, EPI_ISL_833825, EPI_ISL_833826, EPI_ISL_833827, EPI_ISL_833828, EPI_ISL_833829, EPI_ISL_833831, EPI_ISL_833832, EPI_ISL_833836, EPI_ISL_833837, EPI_ISL_833838, EPI_ISL_833839, EPI_ISL_833840, EPI_ISL_833843, EPI_ISL_833847, EPI_ISL_833850, EPI_ISL_833851, EPI_ISL_833852, EPI_ISL_833853, EPI_ISL_833854, EPI_ISL_833857, EPI_ISL_833858, EPI_ISL_833862, EPI_ISL_833863, EPI_ISL_833864, EPI_ISL_833866, EPI_ISL_833867, EPI_ISL_833869, EPI_ISL_833870, EPI_ISL_833871, EPI_ISL_833873, EPI_ISL_833874, EPI_ISL_833875, EPI_ISL_833876, EPI_ISL_833877, EPI_ISL_833878, EPI_ISL_833880, EPI_ISL_833882, EPI_ISL_833883, EPI_ISL_833885, EPI_ISL_833886, EPI_ISL_833887, EPI_ISL_833888, EPI_ISL_833889, EPI_ISL_833891, EPI_ISL_833892, EPI_ISL_833893, EPI_ISL_833897, EPI_ISL_833898, EPI_ISL_833900, EPI_ISL_833901, EPI_ISL_833912, EPI_ISL_833913, EPI_ISL_833914, EPI_ISL_833915, EPI_ISL_833917, EPI_ISL_833918, EPI_ISL_833919, EPI_ISL_833920, EPI_ISL_833921, EPI_ISL_833923, EPI_ISL_833925, EPI_ISL_833926, EPI_ISL_833927, EPI_ISL_833928, EPI_ISL_833929, EPI_ISL_833930, EPI_ISL_833931, EPI_ISL_833932                                                                                                                                                                                                                                                                                                                                                                                                                                                                                                                                                                                                                                                                                                                                                                                                                                                                                                                                                                                                                                                                                                                                                                                                                                                                                                                                                                                                                                                                                                                                                                                                                                                                                                                                                                                                                                                                                                                                                                 |                                                                                                                                                                                                                     |                                                                            |                                                                                                                                                                                                                                                                                                                                                                          |
| see above                                                                                                                                                                                                                                                                                                                                                                                                                                                                                                                                                                                                                                                                                                                                                                                                                                                                                                                                                                                                                                                                                                                                                                                                                                                                                                                                                                                                                                                                                                                                                                                                                                                                                                                                                                                                                                                                                                                                                                                                                                                                                                                                                                                                                                                                                                                                                                                                                                                                                                                                                                                                                                                                                                                                                                                                                                                                                                                                                                                                                                                                                                                                                                                                                                                                                                                                                                                                                                                                                                                                                                                                                                                                                                                                                                                                                                                                                                                                                                                                                                                                                                                                                                                                                                                                                                                                                                                                                                                                                                                                                                                                                                                                                                                                                                                                                                                                                                                                                                                                                                                                                                                                                                                                                                                                                                                                                                                                                                                                                                                                                                                                                                                                                                                                                      | Lighthouse Lab in Cambridge                                                                                                                                                                                         | Wellcome Sanger Institute for the COVID-19 Genomics UK (COG-UK) Consortium | Rob Howes, The Lighthouse Lab in Cambridge and Alex Alderton, Roberto Amato, Sonia Goncalves, Ewan Harrison, David K. Jackson, Ian Johnston, Dominic Kwiatkowski, Cordelia Langford, John Sillitoe on behalf of the Wellcome Sanger Institute COVID-19 Surveillance Team                                                                                                 |
| EPI_ISL_834150, EPI_ISL_835041                                                                                                                                                                                                                                                                                                                                                                                                                                                                                                                                                                                                                                                                                                                                                                                                                                                                                                                                                                                                                                                                                                                                                                                                                                                                                                                                                                                                                                                                                                                                                                                                                                                                                                                                                                                                                                                                                                                                                                                                                                                                                                                                                                                                                                                                                                                                                                                                                                                                                                                                                                                                                                                                                                                                                                                                                                                                                                                                                                                                                                                                                                                                                                                                                                                                                                                                                                                                                                                                                                                                                                                                                                                                                                                                                                                                                                                                                                                                                                                                                                                                                                                                                                                                                                                                                                                                                                                                                                                                                                                                                                                                                                                                                                                                                                                                                                                                                                                                                                                                                                                                                                                                                                                                                                                                                                                                                                                                                                                                                                                                                                                                                                                                                                                                 | Lighthouse Lab in Alderley Park                                                                                                                                                                                     | Wellcome Sanger Institute for the COVID-19 Genomics UK (COG-UK) Consortium | Jacquelyn Wynn, Mairead Hyland, The Lighthouse Lab in Alderley Park and Alex Alderton, Roberto Amato, Sonia Goncalves, Ewan Harrison, David K. Jackson, Ian Johnston, Dominic Kwiatkowski, Cordelia Langford, John Sillitoe on behalf of the Wellcome Sanger Institute COVID-19 Surveillance Team                                                                        |
| EPI_ISL_837055, EPI_ISL_837056, EPI_ISL_837057, EPI_ISL_837059, EPI_ISL_837060, EPI_ISL_837069, EPI_ISL_837176, EPI_ISL_837177, EPI_ISL_837178, EPI_ISL_837179, EPI_ISL_837180, EPI_ISL_837181, EPI_ISL_837182, EPI_ISL_837243, EPI_ISL_837244                                                                                                                                                                                                                                                                                                                                                                                                                                                                                                                                                                                                                                                                                                                                                                                                                                                                                                                                                                                                                                                                                                                                                                                                                                                                                                                                                                                                                                                                                                                                                                                                                                                                                                                                                                                                                                                                                                                                                                                                                                                                                                                                                                                                                                                                                                                                                                                                                                                                                                                                                                                                                                                                                                                                                                                                                                                                                                                                                                                                                                                                                                                                                                                                                                                                                                                                                                                                                                                                                                                                                                                                                                                                                                                                                                                                                                                                                                                                                                                                                                                                                                                                                                                                                                                                                                                                                                                                                                                                                                                                                                                                                                                                                                                                                                                                                                                                                                                                                                                                                                                                                                                                                                                                                                                                                                                                                                                                                                                                                                                 |                                                                                                                                                                                                                     |                                                                            |                                                                                                                                                                                                                                                                                                                                                                          |
| see above                                                                                                                                                                                                                                                                                                                                                                                                                                                                                                                                                                                                                                                                                                                                                                                                                                                                                                                                                                                                                                                                                                                                                                                                                                                                                                                                                                                                                                                                                                                                                                                                                                                                                                                                                                                                                                                                                                                                                                                                                                                                                                                                                                                                                                                                                                                                                                                                                                                                                                                                                                                                                                                                                                                                                                                                                                                                                                                                                                                                                                                                                                                                                                                                                                                                                                                                                                                                                                                                                                                                                                                                                                                                                                                                                                                                                                                                                                                                                                                                                                                                                                                                                                                                                                                                                                                                                                                                                                                                                                                                                                                                                                                                                                                                                                                                                                                                                                                                                                                                                                                                                                                                                                                                                                                                                                                                                                                                                                                                                                                                                                                                                                                                                                                                                      | Respiratory Virus Unit, National Infection Service, Public Health England                                                                                                                                           | COVID-19 Genomics UK (COG-UK) Consortium                                   | PHE Covid Sequencing Team                                                                                                                                                                                                                                                                                                                                                |
| EPI_ISL_837957, EPI_ISL_837959, EPI_ISL_837961, EPI_ISL_837973, EPI_ISL_837974, EPI_ISL_837975, EPI_ISL_837976, EPI_ISL_837977, EPI_ISL_837978, EPI_ISL_837979, EPI_ISL_837980, EPI_ISL_837982, EPI_ISL_837983, EPI_ISL_837984, EPI_ISL_837985, EPI_ISL_837986, EPI_ISL_837987, EPI_ISL_837988, EPI_ISL_837990, EPI_ISL_837991, EPI_ISL_837993, EPI_ISL_837997, EPI_ISL_838000, EPI_ISL_838001, EPI_ISL_838003, EPI_ISL_838004, EPI_ISL_838005, EPI_ISL_838006, EPI_ISL_838007, EPI_ISL_838008, EPI_ISL_838009, EPI_ISL_838010, EPI_ISL_838011, EPI_ISL_838012, EPI_ISL_838013, EPI_ISL_838014, EPI_ISL_838016, EPI_ISL_838019, EPI_ISL_838020, EPI_ISL_838023, EPI_ISL_838024, EPI_ISL_838026, EPI_ISL_838027, EPI_ISL_838028, EPI_ISL_838029, EPI_ISL_838030, EPI_ISL_838031, EPI_ISL_838032, EPI_ISL_838033, EPI_ISL_838036, EPI_ISL_838039, EPI_ISL_838040, EPI_ISL_838041, EPI_ISL_838042, EPI_ISL_838043, EPI_ISL_838044, EPI_ISL_838045, EPI_ISL_838047, EPI_ISL_838049, EPI_ISL_838050, EPI_ISL_838051, EPI_ISL_838052, EPI_ISL_838053, EPI_ISL_838054                                                                                                                                                                                                                                                                                                                                                                                                                                                                                                                                                                                                                                                                                                                                                                                                                                                                                                                                                                                                                                                                                                                                                                                                                                                                                                                                                                                                                                                                                                                                                                                                                                                                                                                                                                                                                                                                                                                                                                                                                                                                                                                                                                                                                                                                                                                                                                                                                                                                                                                                                                                                                                                                                                                                                                                                                                                                                                                                                                                                                                                                                                                                                                                                                                                                                                                                                                                                                                                                                                                                                                                                                                                                                                                                                                                                                                                                                                                                                                                                                                                                                                                                                                                                                                                                                                                                                                                                                                                                                                                                                                                                                                                                                                 |                                                                                                                                                                                                                     |                                                                            |                                                                                                                                                                                                                                                                                                                                                                          |
| see above                                                                                                                                                                                                                                                                                                                                                                                                                                                                                                                                                                                                                                                                                                                                                                                                                                                                                                                                                                                                                                                                                                                                                                                                                                                                                                                                                                                                                                                                                                                                                                                                                                                                                                                                                                                                                                                                                                                                                                                                                                                                                                                                                                                                                                                                                                                                                                                                                                                                                                                                                                                                                                                                                                                                                                                                                                                                                                                                                                                                                                                                                                                                                                                                                                                                                                                                                                                                                                                                                                                                                                                                                                                                                                                                                                                                                                                                                                                                                                                                                                                                                                                                                                                                                                                                                                                                                                                                                                                                                                                                                                                                                                                                                                                                                                                                                                                                                                                                                                                                                                                                                                                                                                                                                                                                                                                                                                                                                                                                                                                                                                                                                                                                                                                                                      | Department of Pathology, University of Cambridge                                                                                                                                                                    | COVID-19 Genomics UK (COG-UK) Consortium                                   | Aminu S. Jahun, Yasmin Chaudhry, Grant Hall, Iliana Georgana, Myra Hosmillo, Martin D. Curran, Malte Pinckert, Surendra Parmar, Ian Goodfellow                                                                                                                                                                                                                           |
| EPI_ISL_838315                                                                                                                                                                                                                                                                                                                                                                                                                                                                                                                                                                                                                                                                                                                                                                                                                                                                                                                                                                                                                                                                                                                                                                                                                                                                                                                                                                                                                                                                                                                                                                                                                                                                                                                                                                                                                                                                                                                                                                                                                                                                                                                                                                                                                                                                                                                                                                                                                                                                                                                                                                                                                                                                                                                                                                                                                                                                                                                                                                                                                                                                                                                                                                                                                                                                                                                                                                                                                                                                                                                                                                                                                                                                                                                                                                                                                                                                                                                                                                                                                                                                                                                                                                                                                                                                                                                                                                                                                                                                                                                                                                                                                                                                                                                                                                                                                                                                                                                                                                                                                                                                                                                                                                                                                                                                                                                                                                                                                                                                                                                                                                                                                                                                                                                                                 | University of Exeter                                                                                                                                                                                                | COVID-19 Genomics UK (COG-UK) Consortium                                   | Ben Temperton,Aaron Jeffries,Michelle Michelsen,Joanna Warwick-Dugdale,Audrey Farbos,Robyn Manley,Stephen Michell,Jane Masoli                                                                                                                                                                                                                                            |
| EPI_ISL_838937, EPI_ISL_838938, EPI_ISL_838939, EPI_ISL_838940, EPI_ISL_838941, EPI_ISL_838942, EPI_ISL_838943, EPI_ISL_838944, EPI_ISL_838945, EPI_ISL_838946, EPI_ISL_838947, EPI_ISL_838968, EPI_ISL_838969, EPI_ISL_838970, EPI_ISL_838971, EPI_ISL_838972, EPI_ISL_838973, EPI_ISL_838974, EPI_ISL_838975, EPI_ISL_838976, EPI_ISL_838977, EPI_ISL_838978, EPI_ISL_838979, EPI_ISL_838980, EPI_ISL_838981, EPI_ISL_838982, EPI_ISL_838983, EPI_ISL_838984, EPI_ISL_838985, EPI_ISL_838986, EPI_ISL_838987, EPI_ISL_838988, EPI_ISL_838989, EPI_ISL_838990, EPI_ISL_838991, EPI_ISL_838992, EPI_ISL_838993, EPI_ISL_838994, EPI_ISL_838995, EPI_ISL_838996, EPI_ISL_838997, EPI_ISL_838998, EPI_ISL_838999, EPI_ISL_839000, EPI_ISL_839001, EPI_ISL_839002, EPI_ISL_839003, EPI_ISL_839004, EPI_ISL_839005, EPI_ISL_839007, EPI_ISL_839008, EPI_ISL_839009, EPI_ISL_839010, EPI_ISL_839011, EPI_ISL_839012, EPI_ISL_839013, EPI_ISL_839014, EPI_ISL_839015, EPI_ISL_839016, EPI_ISL_839017, EPI_ISL_839018, EPI_ISL_839019, EPI_ISL_839021, EPI_ISL_839022, EPI_ISL_839023, EPI_ISL_839024, EPI_ISL_839025, EPI_ISL_839026, EPI_ISL_839027, EPI_ISL_839028, EPI_ISL_839029, EPI_ISL_839030, EPI_ISL_839031, EPI_ISL_839032, EPI_ISL_839033, EPI_ISL_839034, EPI_ISL_839035, EPI_ISL_839036, EPI_ISL_839037, EPI_ISL_839038, EPI_ISL_839039, EPI_ISL_839040, EPI_ISL_839041, EPI_ISL_839042, EPI_ISL_839043, EPI_ISL_839044, EPI_ISL_839045, EPI_ISL_839046, EPI_ISL_839047, EPI_ISL_839048, EPI_ISL_839049, EPI_ISL_839050, EPI_ISL_839051, EPI_ISL_839052, EPI_ISL_839053, EPI_ISL_839054, EPI_ISL_839055, EPI_ISL_839056, EPI_ISL_839057, EPI_ISL_839058, EPI_ISL_839059, EPI_ISL_839060, EPI_ISL_839061, EPI_ISL_839062, EPI_ISL_839063, EPI_ISL_839064, EPI_ISL_839065, EPI_ISL_839066, EPI_ISL_839067, EPI_ISL_839068, EPI_ISL_839069, EPI_ISL_839070, EPI_ISL_839071, EPI_ISL_839072, EPI_ISL_839073, EPI_ISL_839074, EPI_ISL_839075, EPI_ISL_839076, EPI_ISL_839077, EPI_ISL_839078, EPI_ISL_839079, EPI_ISL_839080, EPI_ISL_839081, EPI_ISL_839082, EPI_ISL_839083, EPI_ISL_839084, EPI_ISL_839085, EPI_ISL_839086, EPI_ISL_839087, EPI_ISL_839088, EPI_ISL_839089, EPI_ISL_839090, EPI_ISL_839091, EPI_ISL_839092, EPI_ISL_839093, EPI_ISL_839094, EPI_ISL_839095, EPI_ISL_839096, EPI_ISL_839097, EPI_ISL_839098, EPI_ISL_839099, EPI_ISL_839100, EPI_ISL_839101, EPI_ISL_839102, EPI_ISL_839103, EPI_ISL_839104, EPI_ISL_839105, EPI_ISL_839106, EPI_ISL_839107, EPI_ISL_839108, EPI_ISL_839109, EPI_ISL_839110, EPI_ISL_839111, EPI_ISL_839112, EPI_ISL_839113, EPI_ISL_839114, EPI_ISL_839115, EPI_ISL_839116, EPI_ISL_839117, EPI_ISL_839118, EPI_ISL_839119, EPI_ISL_839120, EPI_ISL_839121, EPI_ISL_839122, EPI_ISL_839123, EPI_ISL_839124, EPI_ISL_839125, EPI_ISL_839126, EPI_ISL_839127, EPI_ISL_839128, EPI_ISL_839129, EPI_ISL_839130, EPI_ISL_839131, EPI_ISL_839132, EPI_ISL_839133, EPI_ISL_839134, EPI_ISL_839135, EPI_ISL_839136, EPI_ISL_839137, EPI_ISL_839138, EPI_ISL_839139, EPI_ISL_839140, EPI_ISL_839141, EPI_ISL_839142, EPI_ISL_839143, EPI_ISL_839144, EPI_ISL_839145, EPI_ISL_839146, EPI_ISL_839147, EPI_ISL_839148, EPI_ISL_839149, EPI_ISL_839150, EPI_ISL_839151, EPI_ISL_839152, EPI_ISL_839153, EPI_ISL_839154, EPI_ISL_839155, EPI_ISL_839156, EPI_ISL_839157, EPI_ISL_839158, EPI_ISL_839159, EPI_ISL_839160, EPI_ISL_839161, EPI_ISL_839162, EPI_ISL_839163, EPI_ISL_839164, EPI_ISL_839165, EPI_ISL_839166, EPI_ISL_839167, EPI_ISL_839168, EPI_ISL_839169, EPI_ISL_839170, EPI_ISL_839171, EPI_ISL_839172, EPI_ISL_839173, EPI_ISL_839174, EPI_ISL_839175, EPI_ISL_839176, EPI_ISL_839177, EPI_ISL_839178, EPI_ISL_839179, EPI_ISL_839180, EPI_ISL_839181, EPI_ISL_839182, EPI_ISL_839183, EPI_ISL_839184, EPI_ISL_839185, EPI_ISL_839186, EPI_ISL_839187, EPI_ISL_839188, EPI_ISL_839189, EPI_ISL_839190, EPI_ISL_839191, EPI_ISL_839192, EPI_ISL_839193, EPI_ISL_839194, EPI_ISL_839195, EPI_ISL_839196, EPI_ISL_839197, EPI_ISL_839198, EPI_ISL_839199, EPI_ISL_839200, EPI_ISL_839201, EPI_ISL_839202, EPI_ISL_839203, EPI_ISL_839204, EPI_ISL_839205, EPI_ISL_839206, EPI_ISL_839207, EPI_ISL_839208, EPI_ISL_839209, EPI_ISL_839210, EPI_ISL_839211, EPI_ISL_839212, EPI_ISL_839213, EPI_ISL_839214, EPI_ISL_839215, EPI_ISL_839216, EPI_ISL_839217, EPI_ISL_839218, EPI_ISL_839219, EPI_ISL_839220, EPI_ISL_839221, EPI_ISL_839222, EPI_ISL_839223, EPI_ISL_839224, EPI_ISL_839225, EPI_ISL_839226, EPI_ISL_839227, EPI_ISL_839228, EPI_ISL_839229, EPI_ISL_839230, EPI_ISL_839231, EPI_ISL_839232, EPI_ISL_839233, EPI_ISL_839234, EPI_ISL_839235, EPI_ISL_839236, EPI_ISL_839237, EPI_ISL_839238, EPI_ISL_839239, EPI_ISL_839240, EPI_ISL_839241, EPI_ISL_839242, EPI_ISL_839243, EPI_ISL_839244, EPI_ISL_839245, EPI_ISL_839246, EPI_ISL_839247, EPI_ISL_839248, EPI_ISL_839249, EPI_ISL_839250, EPI_ISL_839251, EPI_ISL_839252, EPI_ISL_839253, EPI_ISL_839254, EPI_ISL_839255, EPI_ISL_839256, EPI_ISL_839257, EPI_ISL_839258, EPI_ISL_839259, EPI_ISL_839260, EPI_ISL_839261, EPI_ISL_839262, EPI_ISL_839263, EPI_ISL_839264, EPI_ISL_839265, EPI_ISL_839266, EPI_ISL_839267, EPI_ISL_839268, EPI_ISL_839269, EPI_ISL_839270, EPI_ISL_839271, EPI_ISL_839272, EPI_ISL_839273, EPI_ISL_839274, EPI_ISL_839275, EPI_ISL_839276, EPI_ISL_839277, EPI_ISL_839278, EPI_ISL_839279, EPI_ISL_839280, EPI_ISL_839281, EPI_ISL_839282, EPI_ISL_839283, EPI_ISL_839284, EPI_ISL_839285, EPI_ISL_839286, EPI_ISL_839287, EPI_ISL_839288, EPI_ISL_839289, EPI_ISL_839290, EPI_ISL_839291, EPI_ISL_839292, EPI_ISL_839293, EPI_ISL_839294, EPI_ISL_839295, EPI_ISL_839296, EPI_ISL_839297, EPI_ISL_839298, EPI_ISL_839299, EPI_ISL_839300, EPI_ISL_839301, EPI_ISL_839302, EPI_ISL_839303, EPI_ISL_839304 |                                                                                                                                                                                                                     |                                                                            |                                                                                                                                                                                                                                                                                                                                                                          |
| see above                                                                                                                                                                                                                                                                                                                                                                                                                                                                                                                                                                                                                                                                                                                                                                                                                                                                                                                                                                                                                                                                                                                                                                                                                                                                                                                                                                                                                                                                                                                                                                                                                                                                                                                                                                                                                                                                                                                                                                                                                                                                                                                                                                                                                                                                                                                                                                                                                                                                                                                                                                                                                                                                                                                                                                                                                                                                                                                                                                                                                                                                                                                                                                                                                                                                                                                                                                                                                                                                                                                                                                                                                                                                                                                                                                                                                                                                                                                                                                                                                                                                                                                                                                                                                                                                                                                                                                                                                                                                                                                                                                                                                                                                                                                                                                                                                                                                                                                                                                                                                                                                                                                                                                                                                                                                                                                                                                                                                                                                                                                                                                                                                                                                                                                                                      | University College London, Great Ormond Street Hospital for Children NHS Foundation Trust, Imperial College Healthcare NHS Trust                                                                                    | COVID-19 Genomics UK (COG-UK) Consortium                                   | Sergi Castellano, Rachel Williams, Mark Kristiansen, Paola Resende Silva, Sunando Roy, Tony Brooks, Helena Tutili, Paola Niola, Patricia Dyal, Charlotte Williams, Leysa Forrest, Yasmin Panchbhaya, Jacqueline Findlay, Samuel Weeks, Julianne Brown, Kathryn Harris, Paul Randell, James Price, Alison Holmes, Judith Breuer                                           |
| EPI_ISL_840009, EPI_ISL_840010, EPI_ISL_840011, EPI_ISL_840012, EPI_ISL_840013, EPI_ISL_840014, EPI_ISL_840015, EPI_ISL_840016, EPI_ISL_840051, EPI_ISL_840052, EPI_ISL_840053, EPI_ISL_840054, EPI_ISL_840055, EPI_ISL_840056, EPI_ISL_840057, EPI_ISL_840058, EPI_ISL_840059, EPI_ISL_840060, EPI_ISL_840061                                                                                                                                                                                                                                                                                                                                                                                                                                                                                                                                                                                                                                                                                                                                                                                                                                                                                                                                                                                                                                                                                                                                                                                                                                                                                                                                                                                                                                                                                                                                                                                                                                                                                                                                                                                                                                                                                                                                                                                                                                                                                                                                                                                                                                                                                                                                                                                                                                                                                                                                                                                                                                                                                                                                                                                                                                                                                                                                                                                                                                                                                                                                                                                                                                                                                                                                                                                                                                                                                                                                                                                                                                                                                                                                                                                                                                                                                                                                                                                                                                                                                                                                                                                                                                                                                                                                                                                                                                                                                                                                                                                                                                                                                                                                                                                                                                                                                                                                                                                                                                                                                                                                                                                                                                                                                                                                                                                                                                                 |                                                                                                                                                                                                                     |                                                                            |                                                                                                                                                                                                                                                                                                                                                                          |
| see above                                                                                                                                                                                                                                                                                                                                                                                                                                                                                                                                                                                                                                                                                                                                                                                                                                                                                                                                                                                                                                                                                                                                                                                                                                                                                                                                                                                                                                                                                                                                                                                                                                                                                                                                                                                                                                                                                                                                                                                                                                                                                                                                                                                                                                                                                                                                                                                                                                                                                                                                                                                                                                                                                                                                                                                                                                                                                                                                                                                                                                                                                                                                                                                                                                                                                                                                                                                                                                                                                                                                                                                                                                                                                                                                                                                                                                                                                                                                                                                                                                                                                                                                                                                                                                                                                                                                                                                                                                                                                                                                                                                                                                                                                                                                                                                                                                                                                                                                                                                                                                                                                                                                                                                                                                                                                                                                                                                                                                                                                                                                                                                                                                                                                                                                                      | Queens Medical Centre, Clinical Microbiology Department /                                                                                                                                                           | COVID-19 Genomics UK (COG-UK) Consortium                                   | Gemma Clark, Wendy Smith, Manjinder Khakh, Vicki M Fleming, Michelle M Lister, Hannah Howson-Wells, Jonathan Ball, Patrick McClure, Joseph                                                                                                                                                                                                                               |

|                                                                                                                                                                                                                                                                                                                                                                                                                                                                                                                                                                                                                                                                                                                                                                                                                                                                                                                                                                                                                                                                                                                                                                                                                                                                                                                                                                                                                                                                                                                                                                                                                                                                                                                                                                                                                                                                                                                                                                                                                                                                                                                                                                                                                                                                                                                                                                                                                                                                                                                                                                                                                                                                                                                                                                                                                                                                                                                                                                                                                                                                                                                                                                                                                                                                                                                                                                                                                                                                                                                                                                                                                                                                                                                                                                                                                                                                                                                                                                                                                                                                                                                                                                                                                                                                                                                                                                                                                                                                                                                                                                                                                                                                                                                                                                                                                                                                                                                                                                                                                                                                                                                |           |                                                                                                                                                                                  |                                                                            |                                                                                                                                                                                                                                                                                                                                                                        |  |                                                                                                                                                                                                                                                                                                                                                                                |                                                                                          |                                                                            |                                                                                                                                                                                                                                                                                                                                                                        |  |  |  |
|----------------------------------------------------------------------------------------------------------------------------------------------------------------------------------------------------------------------------------------------------------------------------------------------------------------------------------------------------------------------------------------------------------------------------------------------------------------------------------------------------------------------------------------------------------------------------------------------------------------------------------------------------------------------------------------------------------------------------------------------------------------------------------------------------------------------------------------------------------------------------------------------------------------------------------------------------------------------------------------------------------------------------------------------------------------------------------------------------------------------------------------------------------------------------------------------------------------------------------------------------------------------------------------------------------------------------------------------------------------------------------------------------------------------------------------------------------------------------------------------------------------------------------------------------------------------------------------------------------------------------------------------------------------------------------------------------------------------------------------------------------------------------------------------------------------------------------------------------------------------------------------------------------------------------------------------------------------------------------------------------------------------------------------------------------------------------------------------------------------------------------------------------------------------------------------------------------------------------------------------------------------------------------------------------------------------------------------------------------------------------------------------------------------------------------------------------------------------------------------------------------------------------------------------------------------------------------------------------------------------------------------------------------------------------------------------------------------------------------------------------------------------------------------------------------------------------------------------------------------------------------------------------------------------------------------------------------------------------------------------------------------------------------------------------------------------------------------------------------------------------------------------------------------------------------------------------------------------------------------------------------------------------------------------------------------------------------------------------------------------------------------------------------------------------------------------------------------------------------------------------------------------------------------------------------------------------------------------------------------------------------------------------------------------------------------------------------------------------------------------------------------------------------------------------------------------------------------------------------------------------------------------------------------------------------------------------------------------------------------------------------------------------------------------------------------------------------------------------------------------------------------------------------------------------------------------------------------------------------------------------------------------------------------------------------------------------------------------------------------------------------------------------------------------------------------------------------------------------------------------------------------------------------------------------------------------------------------------------------------------------------------------------------------------------------------------------------------------------------------------------------------------------------------------------------------------------------------------------------------------------------------------------------------------------------------------------------------------------------------------------------------------------------------------------------------------------------------------------------------|-----------|----------------------------------------------------------------------------------------------------------------------------------------------------------------------------------|----------------------------------------------------------------------------|------------------------------------------------------------------------------------------------------------------------------------------------------------------------------------------------------------------------------------------------------------------------------------------------------------------------------------------------------------------------|--|--------------------------------------------------------------------------------------------------------------------------------------------------------------------------------------------------------------------------------------------------------------------------------------------------------------------------------------------------------------------------------|------------------------------------------------------------------------------------------|----------------------------------------------------------------------------|------------------------------------------------------------------------------------------------------------------------------------------------------------------------------------------------------------------------------------------------------------------------------------------------------------------------------------------------------------------------|--|--|--|
| DeepSeq Nottingham                                                                                                                                                                                                                                                                                                                                                                                                                                                                                                                                                                                                                                                                                                                                                                                                                                                                                                                                                                                                                                                                                                                                                                                                                                                                                                                                                                                                                                                                                                                                                                                                                                                                                                                                                                                                                                                                                                                                                                                                                                                                                                                                                                                                                                                                                                                                                                                                                                                                                                                                                                                                                                                                                                                                                                                                                                                                                                                                                                                                                                                                                                                                                                                                                                                                                                                                                                                                                                                                                                                                                                                                                                                                                                                                                                                                                                                                                                                                                                                                                                                                                                                                                                                                                                                                                                                                                                                                                                                                                                                                                                                                                                                                                                                                                                                                                                                                                                                                                                                                                                                                                             |           |                                                                                                                                                                                  |                                                                            | Chappell, Theocharis Toleridis, Nadine Holmes, Matthew Carlisle, Christopher Moore, Fei Sang, Johnny Debebe, Victoria Wright, Matthew Loose                                                                                                                                                                                                                            |  |                                                                                                                                                                                                                                                                                                                                                                                |                                                                                          |                                                                            |                                                                                                                                                                                                                                                                                                                                                                        |  |  |  |
| EPI_ISL_841039, EPI_ISL_841148, EPI_ISL_841150, EPI_ISL_841277, EPI_ISL_8414278, EPI_ISL_841283, EPI_ISL_841284, EPI_ISL_841287, EPI_ISL_841290, EPI_ISL_841291, EPI_ISL_841294, EPI_ISL_841295, EPI_ISL_841298                                                                                                                                                                                                                                                                                                                                                                                                                                                                                                                                                                                                                                                                                                                                                                                                                                                                                                                                                                                                                                                                                                                                                                                                                                                                                                                                                                                                                                                                                                                                                                                                                                                                                                                                                                                                                                                                                                                                                                                                                                                                                                                                                                                                                                                                                                                                                                                                                                                                                                                                                                                                                                                                                                                                                                                                                                                                                                                                                                                                                                                                                                                                                                                                                                                                                                                                                                                                                                                                                                                                                                                                                                                                                                                                                                                                                                                                                                                                                                                                                                                                                                                                                                                                                                                                                                                                                                                                                                                                                                                                                                                                                                                                                                                                                                                                                                                                                                | see above | Wales Specialist Virology Centre Sequencing lab: Pathogen Genomics Unit                                                                                                          | Public Health Wales Microbiology Cardiff Wales Specialist Virology Centre  | Catherine Moore, Johnathan Evans, Laura Gifford, Malorie Perry, Simon Cottrell, Angela Marchbank, Alec Birchley, Alexander Adams, Amy Gaskin, Bree Gatica-Wilcox, Jason Coombes, Joel Southgate, Lauren Gilbert, Lee Graham, Nicole Pacchiari, Sara Kumziene-Summerhayes, Sarah Taylor, Sophie Jones, Sara Rey, Matthew Bull, Joanne Watkins, Sally Corden, Tom Connor |  |                                                                                                                                                                                                                                                                                                                                                                                |                                                                                          |                                                                            |                                                                                                                                                                                                                                                                                                                                                                        |  |  |  |
| EPI_ISL_841317, EPI_ISL_841322, EPI_ISL_841324, EPI_ISL_841326, EPI_ISL_841327, EPI_ISL_841328, EPI_ISL_841330, EPI_ISL_841331, EPI_ISL_841339, EPI_ISL_841340, EPI_ISL_841343, EPI_ISL_841344, EPI_ISL_841345, EPI_ISL_841346, EPI_ISL_841347, EPI_ISL_841348, EPI_ISL_841349, EPI_ISL_841350, EPI_ISL_841351, EPI_ISL_841352, EPI_ISL_841353, EPI_ISL_841354, EPI_ISL_841417, EPI_ISL_841426, EPI_ISL_841427, EPI_ISL_841430, EPI_ISL_841431, EPI_ISL_841434, EPI_ISL_841437, EPI_ISL_841440, EPI_ISL_841443, EPI_ISL_841444, EPI_ISL_841445, EPI_ISL_841446, EPI_ISL_841448, EPI_ISL_841451, EPI_ISL_841453, EPI_ISL_841454, EPI_ISL_841455, EPI_ISL_841456, EPI_ISL_841457, EPI_ISL_841458, EPI_ISL_841460, EPI_ISL_841461, EPI_ISL_841462, EPI_ISL_841464, EPI_ISL_841465, EPI_ISL_841467, EPI_ISL_841468, EPI_ISL_841469, EPI_ISL_841470, EPI_ISL_841472, EPI_ISL_841473, EPI_ISL_841474, EPI_ISL_841475, EPI_ISL_841476, EPI_ISL_841477, EPI_ISL_841478, EPI_ISL_841480, EPI_ISL_841481, EPI_ISL_841484, EPI_ISL_841487, EPI_ISL_841488, EPI_ISL_841489, EPI_ISL_841492, EPI_ISL_841493, EPI_ISL_841494, EPI_ISL_841495, EPI_ISL_841496, EPI_ISL_841497, EPI_ISL_841502, EPI_ISL_841516, EPI_ISL_841517, EPI_ISL_841518, EPI_ISL_841519, EPI_ISL_841520, EPI_ISL_841523, EPI_ISL_841524, EPI_ISL_841525, EPI_ISL_841526, EPI_ISL_841527, EPI_ISL_841528, EPI_ISL_841530, EPI_ISL_841532, EPI_ISL_841533, EPI_ISL_841534, EPI_ISL_841535, EPI_ISL_841536, EPI_ISL_841537, EPI_ISL_841538, EPI_ISL_841539, EPI_ISL_841540, EPI_ISL_841541, EPI_ISL_841542, EPI_ISL_841543, EPI_ISL_841544, EPI_ISL_841545, EPI_ISL_841546, EPI_ISL_841547, EPI_ISL_841549, EPI_ISL_841550, EPI_ISL_841551, EPI_ISL_841552, EPI_ISL_841553, EPI_ISL_841554, EPI_ISL_841555, EPI_ISL_841556, EPI_ISL_841557, EPI_ISL_841558, EPI_ISL_841614, EPI_ISL_841621, EPI_ISL_841624, EPI_ISL_841625, EPI_ISL_841628, EPI_ISL_841629, EPI_ISL_841631, EPI_ISL_841632, EPI_ISL_841642, EPI_ISL_841644, EPI_ISL_841645, EPI_ISL_841659, EPI_ISL_841661, EPI_ISL_841665, EPI_ISL_841667, EPI_ISL_841669, EPI_ISL_841670, EPI_ISL_841673, EPI_ISL_841676, EPI_ISL_841677, EPI_ISL_841679, EPI_ISL_841684, EPI_ISL_841684, EPI_ISL_841685, EPI_ISL_841686, EPI_ISL_841687, EPI_ISL_841688, EPI_ISL_841689, EPI_ISL_841690, EPI_ISL_841694, EPI_ISL_841695, EPI_ISL_841700, EPI_ISL_841702, EPI_ISL_841704, EPI_ISL_841705, EPI_ISL_841706, EPI_ISL_841707, EPI_ISL_841709, EPI_ISL_841710, EPI_ISL_841711, EPI_ISL_841712, EPI_ISL_841713, EPI_ISL_841714, EPI_ISL_841715, EPI_ISL_841716, EPI_ISL_841717, EPI_ISL_841718, EPI_ISL_841719, EPI_ISL_841720, EPI_ISL_841721, EPI_ISL_841722, EPI_ISL_841723, EPI_ISL_841724, EPI_ISL_841725, EPI_ISL_841726, EPI_ISL_841727, EPI_ISL_841728, EPI_ISL_841729, EPI_ISL_841730, EPI_ISL_841731, EPI_ISL_841733, EPI_ISL_841734, EPI_ISL_841735, EPI_ISL_841736, EPI_ISL_841738, EPI_ISL_841739, EPI_ISL_841740, EPI_ISL_841741, EPI_ISL_841742, EPI_ISL_841743, EPI_ISL_841744, EPI_ISL_841745, EPI_ISL_841746, EPI_ISL_841747, EPI_ISL_841748, EPI_ISL_841749, EPI_ISL_841750, EPI_ISL_841751, EPI_ISL_841752, EPI_ISL_841753                                                                                                                                                                                                                                                                                                                                                                                                                                                                                                                                                                                                                                                                                                                                                                                                                                                                                                                                                                                                                                                                                                                                                                                                                                                                                                                                                                                                                                                                                                                                                                                                                                                                                                                                                                                                                                                                                                                                                                 |           |                                                                                                                                                                                  |                                                                            |                                                                                                                                                                                                                                                                                                                                                                        |  | see above                                                                                                                                                                                                                                                                                                                                                                      | Originating lab: Wales Specialist Virology Centre Sequencing lab: Pathogen Genomics Unit | Public Health Wales Microbiology Cardiff Wales Specialist Virology Centre  | Catherine Moore, Johnathan Evans, Laura Gifford, Malorie Perry, Simon Cottrell, Angela Marchbank, Alec Birchley, Alexander Adams, Amy Gaskin, Bree Gatica-Wilcox, Jason Coombes, Joel Southgate, Lauren Gilbert, Lee Graham, Nicole Pacchiari, Sara Kumziene-Summerhayes, Sarah Taylor, Sophie Jones, Sara Rey, Matthew Bull, Joanne Watkins, Sally Corden, Tom Connor |  |  |  |
| EPI_ISL_841921                                                                                                                                                                                                                                                                                                                                                                                                                                                                                                                                                                                                                                                                                                                                                                                                                                                                                                                                                                                                                                                                                                                                                                                                                                                                                                                                                                                                                                                                                                                                                                                                                                                                                                                                                                                                                                                                                                                                                                                                                                                                                                                                                                                                                                                                                                                                                                                                                                                                                                                                                                                                                                                                                                                                                                                                                                                                                                                                                                                                                                                                                                                                                                                                                                                                                                                                                                                                                                                                                                                                                                                                                                                                                                                                                                                                                                                                                                                                                                                                                                                                                                                                                                                                                                                                                                                                                                                                                                                                                                                                                                                                                                                                                                                                                                                                                                                                                                                                                                                                                                                                                                 |           | Centre for Enzyme Innovation, University of Portsmouth / Translational Research Laboratory, Portsmouth Hospitals NHS Trust                                                       | COVID-19 Genomics UK (COG-UK) Consortium                                   | Angela Beckett, Yann Bourgeois, Garry Scarlett, Sharon Glaysher, Scott Elliott, Kelly Bicknell, Robert Impey, Allyson Lloyd, Sarah Wylie, Ethan Butcher, Anoop Chauhan, Samuel Robson                                                                                                                                                                                  |  |                                                                                                                                                                                                                                                                                                                                                                                |                                                                                          |                                                                            |                                                                                                                                                                                                                                                                                                                                                                        |  |  |  |
| EPI_ISL_842201, EPI_ISL_842203, EPI_ISL_842207, EPI_ISL_842210, EPI_ISL_842213, EPI_ISL_842219, EPI_ISL_842222, EPI_ISL_842223, EPI_ISL_842225, EPI_ISL_842227, EPI_ISL_842229, EPI_ISL_842230, EPI_ISL_842231, EPI_ISL_842232, EPI_ISL_842236, EPI_ISL_842238, EPI_ISL_842331, EPI_ISL_842332, EPI_ISL_842333, EPI_ISL_842336, EPI_ISL_842337, EPI_ISL_842343, EPI_ISL_842344                                                                                                                                                                                                                                                                                                                                                                                                                                                                                                                                                                                                                                                                                                                                                                                                                                                                                                                                                                                                                                                                                                                                                                                                                                                                                                                                                                                                                                                                                                                                                                                                                                                                                                                                                                                                                                                                                                                                                                                                                                                                                                                                                                                                                                                                                                                                                                                                                                                                                                                                                                                                                                                                                                                                                                                                                                                                                                                                                                                                                                                                                                                                                                                                                                                                                                                                                                                                                                                                                                                                                                                                                                                                                                                                                                                                                                                                                                                                                                                                                                                                                                                                                                                                                                                                                                                                                                                                                                                                                                                                                                                                                                                                                                                                 |           |                                                                                                                                                                                  |                                                                            |                                                                                                                                                                                                                                                                                                                                                                        |  | EPI_ISL_842201, EPI_ISL_842203, EPI_ISL_842207, EPI_ISL_842210, EPI_ISL_842213, EPI_ISL_842219, EPI_ISL_842222, EPI_ISL_842223, EPI_ISL_842225, EPI_ISL_842227, EPI_ISL_842229, EPI_ISL_842230, EPI_ISL_842231, EPI_ISL_842232, EPI_ISL_842236, EPI_ISL_842238, EPI_ISL_842331, EPI_ISL_842332, EPI_ISL_842333, EPI_ISL_842336, EPI_ISL_842337, EPI_ISL_842343, EPI_ISL_842344 |                                                                                          |                                                                            |                                                                                                                                                                                                                                                                                                                                                                        |  |  |  |
| see above                                                                                                                                                                                                                                                                                                                                                                                                                                                                                                                                                                                                                                                                                                                                                                                                                                                                                                                                                                                                                                                                                                                                                                                                                                                                                                                                                                                                                                                                                                                                                                                                                                                                                                                                                                                                                                                                                                                                                                                                                                                                                                                                                                                                                                                                                                                                                                                                                                                                                                                                                                                                                                                                                                                                                                                                                                                                                                                                                                                                                                                                                                                                                                                                                                                                                                                                                                                                                                                                                                                                                                                                                                                                                                                                                                                                                                                                                                                                                                                                                                                                                                                                                                                                                                                                                                                                                                                                                                                                                                                                                                                                                                                                                                                                                                                                                                                                                                                                                                                                                                                                                                      |           | Virology Department, Sheffield Teaching Hospitals NHS Foundation Trust/Department of Infection, Immunity and Cardiovascular Disease, The Medical School, University of Sheffield | COVID-19 Genomics UK (COG-UK) Consortium                                   | Thushan de Silva, Matthew Parker, Nikki Smith, Adri Angyal, Rebecca Brown, Luke Green, Rachel Tucker, Paul Parsons, Danielle Groves, Katie Johnson, Laura Carrilero, Alex Keeley, Dave Partridge, Matthew Wyles, Benjamin Lindsey, Mehmet Yavuz, Mohammad Raza, Cariad Evans                                                                                           |  |                                                                                                                                                                                                                                                                                                                                                                                |                                                                                          |                                                                            |                                                                                                                                                                                                                                                                                                                                                                        |  |  |  |
| EPI_ISL_845893, EPI_ISL_845894, EPI_ISL_845895, EPI_ISL_845896, EPI_ISL_845897, EPI_ISL_845898, EPI_ISL_845899, EPI_ISL_845900, EPI_ISL_845901, EPI_ISL_845902, EPI_ISL_845903, EPI_ISL_845904, EPI_ISL_845905, EPI_ISL_845906, EPI_ISL_845907, EPI_ISL_845908, EPI_ISL_845909, EPI_ISL_845910, EPI_ISL_845911, EPI_ISL_845912, EPI_ISL_845913, EPI_ISL_845914, EPI_ISL_845915, EPI_ISL_845916, EPI_ISL_845917, EPI_ISL_845918, EPI_ISL_845919, EPI_ISL_845920, EPI_ISL_845921, EPI_ISL_845922, EPI_ISL_845923, EPI_ISL_845924, EPI_ISL_845925, EPI_ISL_845926, EPI_ISL_845927, EPI_ISL_845928, EPI_ISL_845929, EPI_ISL_845930, EPI_ISL_845931, EPI_ISL_845932, EPI_ISL_845933, EPI_ISL_845934, EPI_ISL_845935, EPI_ISL_845936, EPI_ISL_845937, EPI_ISL_845938, EPI_ISL_845939, EPI_ISL_845940, EPI_ISL_845941, EPI_ISL_845942, EPI_ISL_845943, EPI_ISL_845944, EPI_ISL_845945, EPI_ISL_845946, EPI_ISL_845947, EPI_ISL_845948, EPI_ISL_845949, EPI_ISL_845950, EPI_ISL_845951, EPI_ISL_845952, EPI_ISL_845953, EPI_ISL_845954, EPI_ISL_845955, EPI_ISL_845956, EPI_ISL_845957, EPI_ISL_845958, EPI_ISL_845959, EPI_ISL_845960, EPI_ISL_845961, EPI_ISL_845962, EPI_ISL_845963, EPI_ISL_845964, EPI_ISL_845965, EPI_ISL_845966, EPI_ISL_845967, EPI_ISL_845968, EPI_ISL_845969, EPI_ISL_845970, EPI_ISL_845971, EPI_ISL_845972, EPI_ISL_845973, EPI_ISL_845974, EPI_ISL_845975, EPI_ISL_845976, EPI_ISL_845977, EPI_ISL_845978, EPI_ISL_845979, EPI_ISL_845980, EPI_ISL_845981, EPI_ISL_845982, EPI_ISL_845983, EPI_ISL_845984, EPI_ISL_845985, EPI_ISL_845986, EPI_ISL_845987, EPI_ISL_845988, EPI_ISL_845989, EPI_ISL_845990, EPI_ISL_845991, EPI_ISL_845992, EPI_ISL_845993, EPI_ISL_845994, EPI_ISL_845995, EPI_ISL_845996, EPI_ISL_845997, EPI_ISL_845998, EPI_ISL_845999, EPI_ISL_846000, EPI_ISL_846001, EPI_ISL_846002, EPI_ISL_846003, EPI_ISL_846004, EPI_ISL_846005, EPI_ISL_846006, EPI_ISL_846007, EPI_ISL_846008, EPI_ISL_846009, EPI_ISL_846010, EPI_ISL_846011, EPI_ISL_846012, EPI_ISL_846013, EPI_ISL_846014, EPI_ISL_846015, EPI_ISL_846016, EPI_ISL_846017, EPI_ISL_846018, EPI_ISL_846019, EPI_ISL_846020, EPI_ISL_846021, EPI_ISL_846022, EPI_ISL_846023, EPI_ISL_846024, EPI_ISL_846025, EPI_ISL_846026, EPI_ISL_846027, EPI_ISL_846028, EPI_ISL_846029, EPI_ISL_846030, EPI_ISL_846031, EPI_ISL_846032, EPI_ISL_846033, EPI_ISL_846034, EPI_ISL_846035, EPI_ISL_846036, EPI_ISL_846037, EPI_ISL_846038, EPI_ISL_846039, EPI_ISL_846040, EPI_ISL_846041, EPI_ISL_846042, EPI_ISL_846043, EPI_ISL_846044, EPI_ISL_846045, EPI_ISL_846046, EPI_ISL_846047, EPI_ISL_846048, EPI_ISL_846049, EPI_ISL_846050, EPI_ISL_846051, EPI_ISL_846052, EPI_ISL_846053, EPI_ISL_846054, EPI_ISL_846055, EPI_ISL_846056, EPI_ISL_846057, EPI_ISL_846058, EPI_ISL_846059, EPI_ISL_846060, EPI_ISL_846061, EPI_ISL_846062, EPI_ISL_846063, EPI_ISL_846064, EPI_ISL_846065, EPI_ISL_846066, EPI_ISL_846067, EPI_ISL_846068, EPI_ISL_846069, EPI_ISL_846070, EPI_ISL_846071, EPI_ISL_846072, EPI_ISL_846073, EPI_ISL_846074, EPI_ISL_846075, EPI_ISL_846076, EPI_ISL_846077, EPI_ISL_846078, EPI_ISL_846079, EPI_ISL_846080, EPI_ISL_846081, EPI_ISL_846082, EPI_ISL_846083, EPI_ISL_846084, EPI_ISL_846085, EPI_ISL_846086, EPI_ISL_846087, EPI_ISL_846088, EPI_ISL_846089, EPI_ISL_846090, EPI_ISL_846091, EPI_ISL_846092, EPI_ISL_846093, EPI_ISL_846094, EPI_ISL_846095, EPI_ISL_846096, EPI_ISL_846097, EPI_ISL_846098, EPI_ISL_846099, EPI_ISL_846100, EPI_ISL_846101, EPI_ISL_846113, EPI_ISL_846113, EPI_ISL_846114, EPI_ISL_846115, EPI_ISL_846116, EPI_ISL_846117, EPI_ISL_846118, EPI_ISL_846119, EPI_ISL_846120, EPI_ISL_846121, EPI_ISL_846122, EPI_ISL_846123, EPI_ISL_846124, EPI_ISL_846125, EPI_ISL_846126, EPI_ISL_846127, EPI_ISL_846128, EPI_ISL_846129, EPI_ISL_846130, EPI_ISL_846131, EPI_ISL_846132, EPI_ISL_846133, EPI_ISL_846134, EPI_ISL_846135, EPI_ISL_846136, EPI_ISL_846137, EPI_ISL_846138, EPI_ISL_846139, EPI_ISL_846140, EPI_ISL_846141, EPI_ISL_846142, EPI_ISL_846143, EPI_ISL_846144, EPI_ISL_846145, EPI_ISL_846146, EPI_ISL_846147, EPI_ISL_846148, EPI_ISL_846149, EPI_ISL_846150, EPI_ISL_846151, EPI_ISL_846152, EPI_ISL_846153, EPI_ISL_846154, EPI_ISL_846155, EPI_ISL_846156, EPI_ISL_846157, EPI_ISL_846158, EPI_ISL_846159, EPI_ISL_846160, EPI_ISL_846161, EPI_ISL_846162, EPI_ISL_846163, EPI_ISL_846164, EPI_ISL_846165, EPI_ISL_846166, EPI_ISL_846167, EPI_ISL_846168, EPI_ISL_846169, EPI_ISL_846170, EPI_ISL_846172, EPI_ISL_846173, EPI_ISL_846174, EPI_ISL_846175, EPI_ISL_846176, EPI_ISL_846177, EPI_ISL_846178, EPI_ISL_846179, EPI_ISL_846180, EPI_ISL_846181, EPI_ISL_846182, EPI_ISL_846183, EPI_ISL_846184, EPI_ISL_846185, EPI_ISL_846186, EPI_ISL_846187, EPI_ISL_846188, EPI_ISL_846189, EPI_ISL_846190, EPI_ISL_846191, EPI_ISL_846192, EPI_ISL_846193, EPI_ISL_846194, EPI_ISL_846195, EPI_ISL_846196, EPI_ISL_846197, EPI_ISL_846198, EPI_ISL_846199                                                                                                                                                                                 |           |                                                                                                                                                                                  |                                                                            |                                                                                                                                                                                                                                                                                                                                                                        |  | see above                                                                                                                                                                                                                                                                                                                                                                      | Lighthouse Lab in Cambridge                                                              | Wellcome Sanger Institute for the COVID-19 Genomics UK (COG-UK) Consortium | Rob Howes, The Lighthouse Lab in Cambridge and Alex Alderton, Roberto Amato, Sonia Goncalves, Ewan Harrison, David K. Jackson, Ian Johnston, Dominic Kwiatkowski, Cordelia Langford, John Sillitoe on behalf of the Wellcome Sanger Institute COVID-19 Surveillance Team                                                                                               |  |  |  |
| EPI_ISL_846200, EPI_ISL_846201, EPI_ISL_846202, EPI_ISL_846203, EPI_ISL_846204, EPI_ISL_846205, EPI_ISL_846206, EPI_ISL_846207, EPI_ISL_846208, EPI_ISL_846209, EPI_ISL_846210, EPI_ISL_846211, EPI_ISL_846212, EPI_ISL_846213, EPI_ISL_846214, EPI_ISL_846215, EPI_ISL_846216, EPI_ISL_846217, EPI_ISL_846218, EPI_ISL_846219, EPI_ISL_846220, EPI_ISL_846221, EPI_ISL_846222, EPI_ISL_846223, EPI_ISL_846224, EPI_ISL_846225, EPI_ISL_846226, EPI_ISL_846227, EPI_ISL_846228, EPI_ISL_846229, EPI_ISL_846230, EPI_ISL_846231, EPI_ISL_846232, EPI_ISL_846233, EPI_ISL_846234, EPI_ISL_846235, EPI_ISL_846236, EPI_ISL_846237, EPI_ISL_846238, EPI_ISL_846239, EPI_ISL_846240, EPI_ISL_846241, EPI_ISL_846242, EPI_ISL_846243, EPI_ISL_846244, EPI_ISL_846245, EPI_ISL_846246, EPI_ISL_846247, EPI_ISL_846248, EPI_ISL_846249, EPI_ISL_846250, EPI_ISL_846251, EPI_ISL_846252, EPI_ISL_846253, EPI_ISL_846254, EPI_ISL_846255, EPI_ISL_846256, EPI_ISL_846257, EPI_ISL_846258, EPI_ISL_846259, EPI_ISL_846260, EPI_ISL_846261, EPI_ISL_846262, EPI_ISL_846263, EPI_ISL_846264, EPI_ISL_846265, EPI_ISL_846266, EPI_ISL_846267, EPI_ISL_846268, EPI_ISL_846269, EPI_ISL_846270, EPI_ISL_846271, EPI_ISL_846272, EPI_ISL_846273, EPI_ISL_846274, EPI_ISL_846275, EPI_ISL_846276, EPI_ISL_846277, EPI_ISL_846278, EPI_ISL_846279, EPI_ISL_846280, EPI_ISL_846281, EPI_ISL_846282, EPI_ISL_846283, EPI_ISL_846284, EPI_ISL_846285, EPI_ISL_846286, EPI_ISL_846287, EPI_ISL_846288, EPI_ISL_846289, EPI_ISL_846290, EPI_ISL_846291, EPI_ISL_846292, EPI_ISL_846293, EPI_ISL_846294, EPI_ISL_846295, EPI_ISL_846296, EPI_ISL_846297, EPI_ISL_846298, EPI_ISL_846299, EPI_ISL_846300, EPI_ISL_846301, EPI_ISL_846302, EPI_ISL_846303, EPI_ISL_846304, EPI_ISL_846305, EPI_ISL_846306, EPI_ISL_846307, EPI_ISL_846308, EPI_ISL_846309, EPI_ISL_846310, EPI_ISL_846311, EPI_ISL_846312, EPI_ISL_846313, EPI_ISL_846314, EPI_ISL_846315, EPI_ISL_846316, EPI_ISL_846317, EPI_ISL_846318, EPI_ISL_846319, EPI_ISL_846320, EPI_ISL_846321, EPI_ISL_846322, EPI_ISL_846323, EPI_ISL_846324, EPI_ISL_846325, EPI_ISL_846326, EPI_ISL_846327, EPI_ISL_846328, EPI_ISL_846329, EPI_ISL_846330, EPI_ISL_846331, EPI_ISL_846332, EPI_ISL_846333, EPI_ISL_846334, EPI_ISL_846335, EPI_ISL_846336, EPI_ISL_846337, EPI_ISL_846338, EPI_ISL_846339, EPI_ISL_846340, EPI_ISL_846341, EPI_ISL_846342, EPI_ISL_846343, EPI_ISL_846344, EPI_ISL_846345, EPI_ISL_846346, EPI_ISL_846347, EPI_ISL_846348, EPI_ISL_846349, EPI_ISL_846350, EPI_ISL_846351, EPI_ISL_846352, EPI_ISL_846353, EPI_ISL_846354, EPI_ISL_846355, EPI_ISL_846356, EPI_ISL_846357, EPI_ISL_846358, EPI_ISL_846359, EPI_ISL_846360, EPI_ISL_846361, EPI_ISL_846362, EPI_ISL_846363, EPI_ISL_846364, EPI_ISL_846365, EPI_ISL_846366, EPI_ISL_846367, EPI_ISL_846368, EPI_ISL_846369, EPI_ISL_846370, EPI_ISL_846371, EPI_ISL_846372, EPI_ISL_846373, EPI_ISL_846374, EPI_ISL_846375, EPI_ISL_846376, EPI_ISL_846377, EPI_ISL_846378, EPI_ISL_846379, EPI_ISL_846380, EPI_ISL_846381, EPI_ISL_846382, EPI_ISL_846383, EPI_ISL_846384, EPI_ISL_846385, EPI_ISL_846386, EPI_ISL_846387, EPI_ISL_846388, EPI_ISL_846389, EPI_ISL_846390, EPI_ISL_846391, EPI_ISL_846392, EPI_ISL_846393, EPI_ISL_846394, EPI_ISL_846395, EPI_ISL_846396, EPI_ISL_846397, EPI_ISL_846398, EPI_ISL_846399, EPI_ISL_846400, EPI_ISL_846402, EPI_ISL_846403, EPI_ISL_846404, EPI_ISL_846405, EPI_ISL_846406, EPI_ISL_846407, EPI_ISL_846408, EPI_ISL_846409, EPI_ISL_846410, EPI_ISL_846411, EPI_ISL_846412, EPI_ISL_846413, EPI_ISL_846414, EPI_ISL_846415, EPI_ISL_846416, EPI_ISL_846417, EPI_ISL_846418, EPI_ISL_846419, EPI_ISL_846420, EPI_ISL_846421, EPI_ISL_846422, EPI_ISL_846423, EPI_ISL_846424, EPI_ISL_846425, EPI_ISL_846426, EPI_ISL_846427, EPI_ISL_846428, EPI_ISL_846429, EPI_ISL_846430, EPI_ISL_846431, EPI_ISL_846432, EPI_ISL_846433, EPI_ISL_846434, EPI_ISL_846435, EPI_ISL_846436, EPI_ISL_846437, EPI_ISL_846438, EPI_ISL_846439, EPI_ISL_846440, EPI_ISL_846441, EPI_ISL_846442, EPI_ISL_846443, EPI_ISL_846444, EPI_ISL_846445, EPI_ISL_846446, EPI_ISL_846447, EPI_ISL_846448, EPI_ISL_846449, EPI_ISL_846450, EPI_ISL_846451, EPI_ISL_846452, EPI_ISL_846453, EPI_ISL_846454, EPI_ISL_846455, EPI_ISL_846456, EPI_ISL_846457, EPI_ISL_846458, EPI_ISL_846459, EPI_ISL_846460, EPI_ISL_846461, EPI_ISL_846462, EPI_ISL_846463, EPI_ISL_846464, EPI_ISL_846465, EPI_ISL_846466, EPI_ISL_846467, EPI_ISL_846468, EPI_ISL_846469, EPI_ISL_846470, EPI_ISL_846471, EPI_ISL_846472, EPI_ISL_846473, EPI_ISL_846474, EPI_ISL_846475, EPI_ISL_846476, EPI_ISL_846477, EPI_ISL_846478, EPI_ISL_846479, EPI_ISL_846480, EPI_ISL_846481, EPI_ISL_846482, EPI_ISL_846483, EPI_ISL_846484, EPI_ISL_846485, EPI_ISL_846486, EPI_ISL_846487, EPI_ISL_846488, EPI_ISL_846489, EPI_ISL_846490, EPI_ISL_846491, EPI_ISL_846492, EPI_ISL_846493, EPI_ISL_846494, EPI_ISL_846495, EPI_ISL_846496, EPI_ISL_846497, EPI_ISL_846498, EPI_ISL_846499, EPI_ISL_846500, EPI_ISL_846501, EPI_ISL_846502, EPI_ISL_846503, EPI_ISL_846504, EPI_ISL_846505, EPI_ISL_846506, EPI_ISL_846507 |           |                                                                                                                                                                                  |                                                                            |                                                                                                                                                                                                                                                                                                                                                                        |  | see above                                                                                                                                                                                                                                                                                                                                                                      | Lighthouse Lab in Alderley Park                                                          | Wellcome Sanger Institute for the COVID-19 Genomics UK (COG-UK) Consortium | Jacquelyn Wynn, Mairead Hyland, The Lighthouse Lab in Alderley Park and Alex Alderton, Roberto Amato, Sonia Goncalves, Ewan Harrison, David K. Jackson, Ian Johnston, Dominic Kwiatkowski, Cordelia Langford, John Sillitoe on behalf of the Wellcome Sanger Institute COVID-19 Surveillance Team                                                                      |  |  |  |
| EPI_ISL_846509                                                                                                                                                                                                                                                                                                                                                                                                                                                                                                                                                                                                                                                                                                                                                                                                                                                                                                                                                                                                                                                                                                                                                                                                                                                                                                                                                                                                                                                                                                                                                                                                                                                                                                                                                                                                                                                                                                                                                                                                                                                                                                                                                                                                                                                                                                                                                                                                                                                                                                                                                                                                                                                                                                                                                                                                                                                                                                                                                                                                                                                                                                                                                                                                                                                                                                                                                                                                                                                                                                                                                                                                                                                                                                                                                                                                                                                                                                                                                                                                                                                                                                                                                                                                                                                                                                                                                                                                                                                                                                                                                                                                                                                                                                                                                                                                                                                                                                                                                                                                                                                                                                 |           | Lighthouse Lab in Cambridge                                                                                                                                                      | Wellcome Sanger Institute for the COVID-19 Genomics UK (COG-UK) Consortium | Rob Howes, The Lighthouse Lab in Cambridge and Alex Alderton, Roberto Amato, Sonia Goncalves, Ewan Harrison, David K. Jackson, Ian Johnston, Dominic Kwiatkowski, Cordelia Langford, John Sillitoe on behalf of the Wellcome Sanger Institute COVID-19 Surveillance Team                                                                                               |  |                                                                                                                                                                                                                                                                                                                                                                                |                                                                                          |                                                                            |                                                                                                                                                                                                                                                                                                                                                                        |  |  |  |
| EPI_ISL_846512                                                                                                                                                                                                                                                                                                                                                                                                                                                                                                                                                                                                                                                                                                                                                                                                                                                                                                                                                                                                                                                                                                                                                                                                                                                                                                                                                                                                                                                                                                                                                                                                                                                                                                                                                                                                                                                                                                                                                                                                                                                                                                                                                                                                                                                                                                                                                                                                                                                                                                                                                                                                                                                                                                                                                                                                                                                                                                                                                                                                                                                                                                                                                                                                                                                                                                                                                                                                                                                                                                                                                                                                                                                                                                                                                                                                                                                                                                                                                                                                                                                                                                                                                                                                                                                                                                                                                                                                                                                                                                                                                                                                                                                                                                                                                                                                                                                                                                                                                                                                                                                                                                 |           | Lighthouse Lab in Alderley Park                                                                                                                                                  | Wellcome Sanger Institute for the COVID-19 Genomics UK (COG-UK) Consortium | Jacquelyn Wynn, Mairead Hyland, The Lighthouse Lab in Alderley Park and Alex Alderton, Roberto Amato, Sonia Goncalves, Ewan Harrison, David K. Jackson, Ian Johnston, Dominic Kwiatkowski, Cordelia Langford, John Sillitoe on behalf of the Wellcome Sanger Institute COVID-19 Surveillance Team                                                                      |  |                                                                                                                                                                                                                                                                                                                                                                                |                                                                                          |                                                                            |                                                                                                                                                                                                                                                                                                                                                                        |  |  |  |
| EPI_ISL_846597, EPI_ISL_846598                                                                                                                                                                                                                                                                                                                                                                                                                                                                                                                                                                                                                                                                                                                                                                                                                                                                                                                                                                                                                                                                                                                                                                                                                                                                                                                                                                                                                                                                                                                                                                                                                                                                                                                                                                                                                                                                                                                                                                                                                                                                                                                                                                                                                                                                                                                                                                                                                                                                                                                                                                                                                                                                                                                                                                                                                                                                                                                                                                                                                                                                                                                                                                                                                                                                                                                                                                                                                                                                                                                                                                                                                                                                                                                                                                                                                                                                                                                                                                                                                                                                                                                                                                                                                                                                                                                                                                                                                                                                                                                                                                                                                                                                                                                                                                                                                                                                                                                                                                                                                                                                                 |           | Respiratory Virus Unit, National Infection Service, Public Health England                                                                                                        | COVID-19 Genomics UK (COG-UK) Consortium                                   | PHE Covid Sequencing Team                                                                                                                                                                                                                                                                                                                                              |  |                                                                                                                                                                                                                                                                                                                                                                                |                                                                                          |                                                                            |                                                                                                                                                                                                                                                                                                                                                                        |  |  |  |
| EPI_ISL_851062, EPI_ISL_851063, EPI_ISL_851064, EPI_ISL_851065, EPI_ISL_851066, EPI_ISL_851067, EPI_ISL_851068, EPI_ISL_851069                                                                                                                                                                                                                                                                                                                                                                                                                                                                                                                                                                                                                                                                                                                                                                                                                                                                                                                                                                                                                                                                                                                                                                                                                                                                                                                                                                                                                                                                                                                                                                                                                                                                                                                                                                                                                                                                                                                                                                                                                                                                                                                                                                                                                                                                                                                                                                                                                                                                                                                                                                                                                                                                                                                                                                                                                                                                                                                                                                                                                                                                                                                                                                                                                                                                                                                                                                                                                                                                                                                                                                                                                                                                                                                                                                                                                                                                                                                                                                                                                                                                                                                                                                                                                                                                                                                                                                                                                                                                                                                                                                                                                                                                                                                                                                                                                                                                                                                                                                                 |           | Lighthouse Lab in Cambridge                                                                                                                                                      | Wellcome Sanger Institute for the COVID-19 Genomics UK (COG-UK) Consortium | Rob Howes, The Lighthouse Lab in Cambridge and Alex Alderton, Roberto Amato, Sonia Goncalves, Ewan Harrison, David K. Jackson, Ian Johnston, Dominic Kwiatkowski, Cordelia Langford, John Sillitoe on behalf of the Wellcome Sanger Institute COVID-19 Surveillance Team                                                                                               |  |                                                                                                                                                                                                                                                                                                                                                                                |                                                                                          |                                                                            |                                                                                                                                                                                                                                                                                                                                                                        |  |  |  |
| EPI_ISL_851070                                                                                                                                                                                                                                                                                                                                                                                                                                                                                                                                                                                                                                                                                                                                                                                                                                                                                                                                                                                                                                                                                                                                                                                                                                                                                                                                                                                                                                                                                                                                                                                                                                                                                                                                                                                                                                                                                                                                                                                                                                                                                                                                                                                                                                                                                                                                                                                                                                                                                                                                                                                                                                                                                                                                                                                                                                                                                                                                                                                                                                                                                                                                                                                                                                                                                                                                                                                                                                                                                                                                                                                                                                                                                                                                                                                                                                                                                                                                                                                                                                                                                                                                                                                                                                                                                                                                                                                                                                                                                                                                                                                                                                                                                                                                                                                                                                                                                                                                                                                                                                                                                                 |           | Lighthouse Lab in Glasgow                                                                                                                                                        | Wellcome Sanger Institute for the COVID-19 Genomics UK (COG-UK) Consortium | Harper VanSteenhouse, Yumi Kasai, David Gray, Carol Clugston, Anna Dominiczak and Alex Alderton, Roberto Amato, Sonia Goncalves, Ewan Harrison,                                                                                                                                                                                                                        |  |                                                                                                                                                                                                                                                                                                                                                                                |                                                                                          |                                                                            |                                                                                                                                                                                                                                                                                                                                                                        |  |  |  |

[illegible]

[illegible]

[illegible]

[illegible]



[illegible]

[illegible]

[illegible]

[illegible]

[illegible]

[illegible]

|                                                                                                                                                                                                                                                                                                                                                                                                                                                                                                                                                                                                                                                                                                                                                                                                                                                                                                                                                                                                                                                                                                                                                                                                                                                                                                                                                                                                                                                                                                                                                                                                                                                                                                                                                                                                                                                                                                                                                                                                                                                                                                                                                                                                                                                                                                                                                                                                                                                                                                                                                                                                                                                                                                                                                                                                                                                                                                                                                                                                                                                                                                                                                                                                                                                                                                                                                                                                                                                                                                                                                                                                                                                                                                                                                                                                                                                                                                                                                                                                                                                                                                                                                                                                                                                                                                                                                                                                                                                                                                                                                                                                                                                                                                                                                                                                                                                                                                                                                                                                                                                                                                                                                                                                                                                                                                                                                                                                                                                                                                                                                                                                                                                                                                                                                                                                                                                                                                                                                                                                                                                                                                                                                                                                                                                                                                                                                                                                                                                                                                                                                                                                                                                                                                                                                                                                                                                                                                                                                                                                                                                                                                                                                                                                                                                                                                                                                                                                                                                                                                                                                                                                                                                                                                                                                                                                                                                                                                                                                                                                                                                                                                                                                                                                                                                                                                                                                                                                                                                                                                                                                                                                                                                                                                                                                                                                                                                                                                                                                                                                                                                                                                                                                                                                                                                                                                                                                                                                                                                                                                                                                                                                                                                                                                                                                                                                                                                                                                                                                                                                                                                                                                                                                                                                                                                                                                                                                                                                                                                                                                                                                                                                                                                                                                                                                                                                                                                                                                                                                                                                                                                                                                                                                                                                                                                                                                                                                                                                                                                                                                                                                                                                                                                                                                                                                                                                                                                                                                                                                                                                                                                                                                                                                                                                                                                                                                                                                                                                                                                                                                                                                                                                                                                                                                                                                                                                                        |                                                                           |                                                                            |                                                                                                                                                                                                                                                                                                             |                                                                                                                                                                                                                                                                                                             |
|------------------------------------------------------------------------------------------------------------------------------------------------------------------------------------------------------------------------------------------------------------------------------------------------------------------------------------------------------------------------------------------------------------------------------------------------------------------------------------------------------------------------------------------------------------------------------------------------------------------------------------------------------------------------------------------------------------------------------------------------------------------------------------------------------------------------------------------------------------------------------------------------------------------------------------------------------------------------------------------------------------------------------------------------------------------------------------------------------------------------------------------------------------------------------------------------------------------------------------------------------------------------------------------------------------------------------------------------------------------------------------------------------------------------------------------------------------------------------------------------------------------------------------------------------------------------------------------------------------------------------------------------------------------------------------------------------------------------------------------------------------------------------------------------------------------------------------------------------------------------------------------------------------------------------------------------------------------------------------------------------------------------------------------------------------------------------------------------------------------------------------------------------------------------------------------------------------------------------------------------------------------------------------------------------------------------------------------------------------------------------------------------------------------------------------------------------------------------------------------------------------------------------------------------------------------------------------------------------------------------------------------------------------------------------------------------------------------------------------------------------------------------------------------------------------------------------------------------------------------------------------------------------------------------------------------------------------------------------------------------------------------------------------------------------------------------------------------------------------------------------------------------------------------------------------------------------------------------------------------------------------------------------------------------------------------------------------------------------------------------------------------------------------------------------------------------------------------------------------------------------------------------------------------------------------------------------------------------------------------------------------------------------------------------------------------------------------------------------------------------------------------------------------------------------------------------------------------------------------------------------------------------------------------------------------------------------------------------------------------------------------------------------------------------------------------------------------------------------------------------------------------------------------------------------------------------------------------------------------------------------------------------------------------------------------------------------------------------------------------------------------------------------------------------------------------------------------------------------------------------------------------------------------------------------------------------------------------------------------------------------------------------------------------------------------------------------------------------------------------------------------------------------------------------------------------------------------------------------------------------------------------------------------------------------------------------------------------------------------------------------------------------------------------------------------------------------------------------------------------------------------------------------------------------------------------------------------------------------------------------------------------------------------------------------------------------------------------------------------------------------------------------------------------------------------------------------------------------------------------------------------------------------------------------------------------------------------------------------------------------------------------------------------------------------------------------------------------------------------------------------------------------------------------------------------------------------------------------------------------------------------------------------------------------------------------------------------------------------------------------------------------------------------------------------------------------------------------------------------------------------------------------------------------------------------------------------------------------------------------------------------------------------------------------------------------------------------------------------------------------------------------------------------------------------------------------------------------------------------------------------------------------------------------------------------------------------------------------------------------------------------------------------------------------------------------------------------------------------------------------------------------------------------------------------------------------------------------------------------------------------------------------------------------------------------------------------------------------------------------------------------------------------------------------------------------------------------------------------------------------------------------------------------------------------------------------------------------------------------------------------------------------------------------------------------------------------------------------------------------------------------------------------------------------------------------------------------------------------------------------------------------------------------------------------------------------------------------------------------------------------------------------------------------------------------------------------------------------------------------------------------------------------------------------------------------------------------------------------------------------------------------------------------------------------------------------------------------------------------------------------------------------------------------------------------------------------------------------------------------------------------------------------------------------------------------------------------------------------------------------------------------------------------------------------------------------------------------------------------------------------------------------------------------------------------------------------------------------------------------------------------------------------------------------------------------------------------------------------------------------------------------------------------------------------------------------------------------------------------------------------------------------------------------------------------------------------------------------------------------------------------------------------------------------------------------------------------------------------------------------------------------------------------------------------------------------------------------------------------------------------------------------------------------------------------------------------------------------------------------------------------------------------------------------------------------------------------------------------------------------------------------------------------------------------------------------------------------------------------------------------------------------------------------------------------------------------------------------------------------------------------------------------------------------------------------------------------------------------------------------------------------------------------------------------------------------------------------------------------------------------------------------------------------------------------------------------------------------------------------------------------------------------------------------------------------------------------------------------------------------------------------------------------------------------------------------------------------------------------------------------------------------------------------------------------------------------------------------------------------------------------------------------------------------------------------------------------------------------------------------------------------------------------------------------------------------------------------------------------------------------------------------------------------------------------------------------------------------------------------------------------------------------------------------------------------------------------------------------------------------------------------------------------------------------------------------------------------------------------------------------------------------------------------------------------------------------------------------------------------------------------------------------------------------------------------------------------------------------------------------------------------------------------------------------------------------------------------------------------------------------------------------------------------------------------------------------------------------------------------------------------------------------------------------------------------------------------------------------------------------------------------------------------------------------------------------------------------------------------------------------------------------------------------------------------------------------------------------------------------------------------------------------------------------------------------------------------------------------------------------------------------------------------------------------------------------------------------------------------------------------------------------------------------------------------------------------------------------------------------------------------------------------------------------------------------------------------------------------------------------------------------------------------------------------------------------------------------------------------------------------------------------------------------------------------------------------------------------------------------------------------------------------------------------------------------------------------------------------------------------------------------------------------------------------------------------|---------------------------------------------------------------------------|----------------------------------------------------------------------------|-------------------------------------------------------------------------------------------------------------------------------------------------------------------------------------------------------------------------------------------------------------------------------------------------------------|-------------------------------------------------------------------------------------------------------------------------------------------------------------------------------------------------------------------------------------------------------------------------------------------------------------|
| EPI_ISL_857880                                                                                                                                                                                                                                                                                                                                                                                                                                                                                                                                                                                                                                                                                                                                                                                                                                                                                                                                                                                                                                                                                                                                                                                                                                                                                                                                                                                                                                                                                                                                                                                                                                                                                                                                                                                                                                                                                                                                                                                                                                                                                                                                                                                                                                                                                                                                                                                                                                                                                                                                                                                                                                                                                                                                                                                                                                                                                                                                                                                                                                                                                                                                                                                                                                                                                                                                                                                                                                                                                                                                                                                                                                                                                                                                                                                                                                                                                                                                                                                                                                                                                                                                                                                                                                                                                                                                                                                                                                                                                                                                                                                                                                                                                                                                                                                                                                                                                                                                                                                                                                                                                                                                                                                                                                                                                                                                                                                                                                                                                                                                                                                                                                                                                                                                                                                                                                                                                                                                                                                                                                                                                                                                                                                                                                                                                                                                                                                                                                                                                                                                                                                                                                                                                                                                                                                                                                                                                                                                                                                                                                                                                                                                                                                                                                                                                                                                                                                                                                                                                                                                                                                                                                                                                                                                                                                                                                                                                                                                                                                                                                                                                                                                                                                                                                                                                                                                                                                                                                                                                                                                                                                                                                                                                                                                                                                                                                                                                                                                                                                                                                                                                                                                                                                                                                                                                                                                                                                                                                                                                                                                                                                                                                                                                                                                                                                                                                                                                                                                                                                                                                                                                                                                                                                                                                                                                                                                                                                                                                                                                                                                                                                                                                                                                                                                                                                                                                                                                                                                                                                                                                                                                                                                                                                                                                                                                                                                                                                                                                                                                                                                                                                                                                                                                                                                                                                                                                                                                                                                                                                                                                                                                                                                                                                                                                                                                                                                                                                                                                                                                                                                                                                                                                                                                                                                                                                                         | Lighthouse Lab in Alderley Park                                           | Wellcome Sanger Institute for the COVID-19 Genomics UK (COG-UK) Consortium | Jacquelyn Wynn, Mairead Hyland, The Lighthouse Lab in Alderley Park and Alex Alderton, Roberto Amato, Sonia Goncalves, Ewan Harrison, David K. Jackson, Ian Johnston, Dominic Kwiatkowski, Cordelia Langford, John Sillitoe on behalf of the Wellcome Sanger Institute COVID-19 Surveillance Team           |                                                                                                                                                                                                                                                                                                             |
| EPI_ISL_857881                                                                                                                                                                                                                                                                                                                                                                                                                                                                                                                                                                                                                                                                                                                                                                                                                                                                                                                                                                                                                                                                                                                                                                                                                                                                                                                                                                                                                                                                                                                                                                                                                                                                                                                                                                                                                                                                                                                                                                                                                                                                                                                                                                                                                                                                                                                                                                                                                                                                                                                                                                                                                                                                                                                                                                                                                                                                                                                                                                                                                                                                                                                                                                                                                                                                                                                                                                                                                                                                                                                                                                                                                                                                                                                                                                                                                                                                                                                                                                                                                                                                                                                                                                                                                                                                                                                                                                                                                                                                                                                                                                                                                                                                                                                                                                                                                                                                                                                                                                                                                                                                                                                                                                                                                                                                                                                                                                                                                                                                                                                                                                                                                                                                                                                                                                                                                                                                                                                                                                                                                                                                                                                                                                                                                                                                                                                                                                                                                                                                                                                                                                                                                                                                                                                                                                                                                                                                                                                                                                                                                                                                                                                                                                                                                                                                                                                                                                                                                                                                                                                                                                                                                                                                                                                                                                                                                                                                                                                                                                                                                                                                                                                                                                                                                                                                                                                                                                                                                                                                                                                                                                                                                                                                                                                                                                                                                                                                                                                                                                                                                                                                                                                                                                                                                                                                                                                                                                                                                                                                                                                                                                                                                                                                                                                                                                                                                                                                                                                                                                                                                                                                                                                                                                                                                                                                                                                                                                                                                                                                                                                                                                                                                                                                                                                                                                                                                                                                                                                                                                                                                                                                                                                                                                                                                                                                                                                                                                                                                                                                                                                                                                                                                                                                                                                                                                                                                                                                                                                                                                                                                                                                                                                                                                                                                                                                                                                                                                                                                                                                                                                                                                                                                                                                                                                                                                                                         | Lighthouse Lab in Glasgow                                                 | Wellcome Sanger Institute for the COVID-19 Genomics UK (COG-UK) Consortium | Harper VanSteenhouse, Yumi Kasai, David Gray, Carol Clugston, Anna Dominiczak and Alex Alderton, Roberto Amato, Sonia Goncalves, Ewan Harrison, David K. Jackson, Ian Johnston, Dominic Kwiatkowski, Cordelia Langford, John Sillitoe on behalf of the Wellcome Sanger Institute COVID-19 Surveillance Team |                                                                                                                                                                                                                                                                                                             |
| EPI_ISL_857882, EPI_ISL_857883, EPI_ISL_857884                                                                                                                                                                                                                                                                                                                                                                                                                                                                                                                                                                                                                                                                                                                                                                                                                                                                                                                                                                                                                                                                                                                                                                                                                                                                                                                                                                                                                                                                                                                                                                                                                                                                                                                                                                                                                                                                                                                                                                                                                                                                                                                                                                                                                                                                                                                                                                                                                                                                                                                                                                                                                                                                                                                                                                                                                                                                                                                                                                                                                                                                                                                                                                                                                                                                                                                                                                                                                                                                                                                                                                                                                                                                                                                                                                                                                                                                                                                                                                                                                                                                                                                                                                                                                                                                                                                                                                                                                                                                                                                                                                                                                                                                                                                                                                                                                                                                                                                                                                                                                                                                                                                                                                                                                                                                                                                                                                                                                                                                                                                                                                                                                                                                                                                                                                                                                                                                                                                                                                                                                                                                                                                                                                                                                                                                                                                                                                                                                                                                                                                                                                                                                                                                                                                                                                                                                                                                                                                                                                                                                                                                                                                                                                                                                                                                                                                                                                                                                                                                                                                                                                                                                                                                                                                                                                                                                                                                                                                                                                                                                                                                                                                                                                                                                                                                                                                                                                                                                                                                                                                                                                                                                                                                                                                                                                                                                                                                                                                                                                                                                                                                                                                                                                                                                                                                                                                                                                                                                                                                                                                                                                                                                                                                                                                                                                                                                                                                                                                                                                                                                                                                                                                                                                                                                                                                                                                                                                                                                                                                                                                                                                                                                                                                                                                                                                                                                                                                                                                                                                                                                                                                                                                                                                                                                                                                                                                                                                                                                                                                                                                                                                                                                                                                                                                                                                                                                                                                                                                                                                                                                                                                                                                                                                                                                                                                                                                                                                                                                                                                                                                                                                                                                                                                                                                                                                         | Lighthouse Lab in Alderley Park                                           | Wellcome Sanger Institute for the COVID-19 Genomics UK (COG-UK) Consortium | Jacquelyn Wynn, Mairead Hyland, The Lighthouse Lab in Alderley Park and Alex Alderton, Roberto Amato, Sonia Goncalves, Ewan Harrison, David K. Jackson, Ian Johnston, Dominic Kwiatkowski, Cordelia Langford, John Sillitoe on behalf of the Wellcome Sanger Institute COVID-19 Surveillance Team           |                                                                                                                                                                                                                                                                                                             |
| EPI_ISL_857885                                                                                                                                                                                                                                                                                                                                                                                                                                                                                                                                                                                                                                                                                                                                                                                                                                                                                                                                                                                                                                                                                                                                                                                                                                                                                                                                                                                                                                                                                                                                                                                                                                                                                                                                                                                                                                                                                                                                                                                                                                                                                                                                                                                                                                                                                                                                                                                                                                                                                                                                                                                                                                                                                                                                                                                                                                                                                                                                                                                                                                                                                                                                                                                                                                                                                                                                                                                                                                                                                                                                                                                                                                                                                                                                                                                                                                                                                                                                                                                                                                                                                                                                                                                                                                                                                                                                                                                                                                                                                                                                                                                                                                                                                                                                                                                                                                                                                                                                                                                                                                                                                                                                                                                                                                                                                                                                                                                                                                                                                                                                                                                                                                                                                                                                                                                                                                                                                                                                                                                                                                                                                                                                                                                                                                                                                                                                                                                                                                                                                                                                                                                                                                                                                                                                                                                                                                                                                                                                                                                                                                                                                                                                                                                                                                                                                                                                                                                                                                                                                                                                                                                                                                                                                                                                                                                                                                                                                                                                                                                                                                                                                                                                                                                                                                                                                                                                                                                                                                                                                                                                                                                                                                                                                                                                                                                                                                                                                                                                                                                                                                                                                                                                                                                                                                                                                                                                                                                                                                                                                                                                                                                                                                                                                                                                                                                                                                                                                                                                                                                                                                                                                                                                                                                                                                                                                                                                                                                                                                                                                                                                                                                                                                                                                                                                                                                                                                                                                                                                                                                                                                                                                                                                                                                                                                                                                                                                                                                                                                                                                                                                                                                                                                                                                                                                                                                                                                                                                                                                                                                                                                                                                                                                                                                                                                                                                                                                                                                                                                                                                                                                                                                                                                                                                                                                                                                                         | Lighthouse Lab in Glasgow                                                 | Wellcome Sanger Institute for the COVID-19 Genomics UK (COG-UK) Consortium | Harper VanSteenhouse, Yumi Kasai, David Gray, Carol Clugston, Anna Dominiczak and Alex Alderton, Roberto Amato, Sonia Goncalves, Ewan Harrison, David K. Jackson, Ian Johnston, Dominic Kwiatkowski, Cordelia Langford, John Sillitoe on behalf of the Wellcome Sanger Institute COVID-19 Surveillance Team |                                                                                                                                                                                                                                                                                                             |
| EPI_ISL_857886                                                                                                                                                                                                                                                                                                                                                                                                                                                                                                                                                                                                                                                                                                                                                                                                                                                                                                                                                                                                                                                                                                                                                                                                                                                                                                                                                                                                                                                                                                                                                                                                                                                                                                                                                                                                                                                                                                                                                                                                                                                                                                                                                                                                                                                                                                                                                                                                                                                                                                                                                                                                                                                                                                                                                                                                                                                                                                                                                                                                                                                                                                                                                                                                                                                                                                                                                                                                                                                                                                                                                                                                                                                                                                                                                                                                                                                                                                                                                                                                                                                                                                                                                                                                                                                                                                                                                                                                                                                                                                                                                                                                                                                                                                                                                                                                                                                                                                                                                                                                                                                                                                                                                                                                                                                                                                                                                                                                                                                                                                                                                                                                                                                                                                                                                                                                                                                                                                                                                                                                                                                                                                                                                                                                                                                                                                                                                                                                                                                                                                                                                                                                                                                                                                                                                                                                                                                                                                                                                                                                                                                                                                                                                                                                                                                                                                                                                                                                                                                                                                                                                                                                                                                                                                                                                                                                                                                                                                                                                                                                                                                                                                                                                                                                                                                                                                                                                                                                                                                                                                                                                                                                                                                                                                                                                                                                                                                                                                                                                                                                                                                                                                                                                                                                                                                                                                                                                                                                                                                                                                                                                                                                                                                                                                                                                                                                                                                                                                                                                                                                                                                                                                                                                                                                                                                                                                                                                                                                                                                                                                                                                                                                                                                                                                                                                                                                                                                                                                                                                                                                                                                                                                                                                                                                                                                                                                                                                                                                                                                                                                                                                                                                                                                                                                                                                                                                                                                                                                                                                                                                                                                                                                                                                                                                                                                                                                                                                                                                                                                                                                                                                                                                                                                                                                                                                                                                         | Lighthouse Lab in Alderley Park                                           | Wellcome Sanger Institute for the COVID-19 Genomics UK (COG-UK) Consortium | Jacquelyn Wynn, Mairead Hyland, The Lighthouse Lab in Alderley Park and Alex Alderton, Roberto Amato, Sonia Goncalves, Ewan Harrison, David K. Jackson, Ian Johnston, Dominic Kwiatkowski, Cordelia Langford, John Sillitoe on behalf of the Wellcome Sanger Institute COVID-19 Surveillance Team           |                                                                                                                                                                                                                                                                                                             |
| EPI_ISL_857887, EPI_ISL_857888, EPI_ISL_857889, EPI_ISL_857892, EPI_ISL_857893, EPI_ISL_857894, EPI_ISL_857895, EPI_ISL_857896, EPI_ISL_857897, EPI_ISL_857898, EPI_ISL_857899, EPI_ISL_857900, EPI_ISL_857901, EPI_ISL_857910, EPI_ISL_857911, EPI_ISL_857912, EPI_ISL_857913, EPI_ISL_857914, EPI_ISL_857915, EPI_ISL_857916, EPI_ISL_857917, EPI_ISL_857918, EPI_ISL_857919, EPI_ISL_857920, EPI_ISL_857921, EPI_ISL_857922, EPI_ISL_857923, EPI_ISL_857924, EPI_ISL_857925, EPI_ISL_857926, EPI_ISL_857927, EPI_ISL_857928, EPI_ISL_857929, EPI_ISL_857930, EPI_ISL_857931, EPI_ISL_857932, EPI_ISL_857933, EPI_ISL_857934, EPI_ISL_857935, EPI_ISL_857936, EPI_ISL_857937, EPI_ISL_857938, EPI_ISL_857939, EPI_ISL_857940, EPI_ISL_857941, EPI_ISL_857942, EPI_ISL_857943, EPI_ISL_857944, EPI_ISL_857945, EPI_ISL_857946, EPI_ISL_857947, EPI_ISL_857948, EPI_ISL_857949, EPI_ISL_857950, EPI_ISL_857951, EPI_ISL_857952, EPI_ISL_857953, EPI_ISL_857954, EPI_ISL_857955, EPI_ISL_857956, EPI_ISL_857957, EPI_ISL_857958, EPI_ISL_857959                                                                                                                                                                                                                                                                                                                                                                                                                                                                                                                                                                                                                                                                                                                                                                                                                                                                                                                                                                                                                                                                                                                                                                                                                                                                                                                                                                                                                                                                                                                                                                                                                                                                                                                                                                                                                                                                                                                                                                                                                                                                                                                                                                                                                                                                                                                                                                                                                                                                                                                                                                                                                                                                                                                                                                                                                                                                                                                                                                                                                                                                                                                                                                                                                                                                                                                                                                                                                                                                                                                                                                                                                                                                                                                                                                                                                                                                                                                                                                                                                                                                                                                                                                                                                                                                                                                                                                                                                                                                                                                                                                                                                                                                                                                                                                                                                                                                                                                                                                                                                                                                                                                                                                                                                                                                                                                                                                                                                                                                                                                                                                                                                                                                                                                                                                                                                                                                                                                                                                                                                                                                                                                                                                                                                                                                                                                                                                                                                                                                                                                                                                                                                                                                                                                                                                                                                                                                                                                                                                                                                                                                                                                                                                                                                                                                                                                                                                                                                                                                                                                                                                                                                                                                                                                                                                                                                                                                                                                                                                                                                                                                                                                                                                                                                                                                                                                                                                                                                                                                                                                                                                                                                                                                                                                                                                                                                                                                                                                                                                                                                                                                                                                                                                                                                                                                                                                                                                                                                                                                                                                                                                                                                                                                                                                                                                                                                                                                                                                                                                                                                                                                                                                                                                                                                                                                                                                                                                                                                                                                                                                                                                                                                                                                                                                                                                                                                                                                                                                                                                                                                                                                                                                                                                                                                                                                                                                                                                                                                                                                                                                                                                                                                                                                                                                                                                         | see above                                                                 | Lighthouse Lab in Glasgow                                                  | Wellcome Sanger Institute for the COVID-19 Genomics UK (COG-UK) Consortium                                                                                                                                                                                                                                  | Harper VanSteenhouse, Yumi Kasai, David Gray, Carol Clugston, Anna Dominiczak and Alex Alderton, Roberto Amato, Sonia Goncalves, Ewan Harrison, David K. Jackson, Ian Johnston, Dominic Kwiatkowski, Cordelia Langford, John Sillitoe on behalf of the Wellcome Sanger Institute COVID-19 Surveillance Team |
| EPI_ISL_857960, EPI_ISL_857961, EPI_ISL_857962, EPI_ISL_857963, EPI_ISL_857964, EPI_ISL_857965, EPI_ISL_857966, EPI_ISL_857967, EPI_ISL_857968, EPI_ISL_857969, EPI_ISL_857970, EPI_ISL_857971, EPI_ISL_857972, EPI_ISL_857973, EPI_ISL_857974, EPI_ISL_857975, EPI_ISL_857976, EPI_ISL_857977, EPI_ISL_857978, EPI_ISL_857979, EPI_ISL_857980, EPI_ISL_857981, EPI_ISL_857982, EPI_ISL_857983, EPI_ISL_857984, EPI_ISL_857985, EPI_ISL_857986, EPI_ISL_857987, EPI_ISL_857988, EPI_ISL_857989, EPI_ISL_857990, EPI_ISL_857991, EPI_ISL_857992, EPI_ISL_857993, EPI_ISL_857994, EPI_ISL_857995, EPI_ISL_857996, EPI_ISL_857997, EPI_ISL_857998, EPI_ISL_857999, EPI_ISL_858000, EPI_ISL_858001, EPI_ISL_858002, EPI_ISL_858003, EPI_ISL_858004, EPI_ISL_858005, EPI_ISL_858006, EPI_ISL_858007, EPI_ISL_858008, EPI_ISL_858009, EPI_ISL_858010                                                                                                                                                                                                                                                                                                                                                                                                                                                                                                                                                                                                                                                                                                                                                                                                                                                                                                                                                                                                                                                                                                                                                                                                                                                                                                                                                                                                                                                                                                                                                                                                                                                                                                                                                                                                                                                                                                                                                                                                                                                                                                                                                                                                                                                                                                                                                                                                                                                                                                                                                                                                                                                                                                                                                                                                                                                                                                                                                                                                                                                                                                                                                                                                                                                                                                                                                                                                                                                                                                                                                                                                                                                                                                                                                                                                                                                                                                                                                                                                                                                                                                                                                                                                                                                                                                                                                                                                                                                                                                                                                                                                                                                                                                                                                                                                                                                                                                                                                                                                                                                                                                                                                                                                                                                                                                                                                                                                                                                                                                                                                                                                                                                                                                                                                                                                                                                                                                                                                                                                                                                                                                                                                                                                                                                                                                                                                                                                                                                                                                                                                                                                                                                                                                                                                                                                                                                                                                                                                                                                                                                                                                                                                                                                                                                                                                                                                                                                                                                                                                                                                                                                                                                                                                                                                                                                                                                                                                                                                                                                                                                                                                                                                                                                                                                                                                                                                                                                                                                                                                                                                                                                                                                                                                                                                                                                                                                                                                                                                                                                                                                                                                                                                                                                                                                                                                                                                                                                                                                                                                                                                                                                                                                                                                                                                                                                                                                                                                                                                                                                                                                                                                                                                                                                                                                                                                                                                                                                                                                                                                                                                                                                                                                                                                                                                                                                                                                                                                                                                                                                                                                                                                                                                                                                                                                                                                                                                                                                                                                                                                                                                                                                                                                                                                                                                                                                                                                                                                                                                                         | see above                                                                 | Lighthouse Lab in Alderley Park                                            | Wellcome Sanger Institute for the COVID-19 Genomics UK (COG-UK) Consortium                                                                                                                                                                                                                                  | Jacquelyn Wynn, Mairead Hyland, The Lighthouse Lab in Alderley Park and Alex Alderton, Roberto Amato, Sonia Goncalves, Ewan Harrison, David K. Jackson, Ian Johnston, Dominic Kwiatkowski, Cordelia Langford, John Sillitoe on behalf of the Wellcome Sanger Institute COVID-19 Surveillance Team           |
| EPI_ISL_858011, EPI_ISL_858012, EPI_ISL_858013, EPI_ISL_858015, EPI_ISL_858016, EPI_ISL_858017, EPI_ISL_858018, EPI_ISL_858019, EPI_ISL_858021, EPI_ISL_858022, EPI_ISL_858023, EPI_ISL_858024, EPI_ISL_858025, EPI_ISL_858026, EPI_ISL_858027, EPI_ISL_858028, EPI_ISL_858030, EPI_ISL_858031, EPI_ISL_858032, EPI_ISL_858033, EPI_ISL_858034, EPI_ISL_858035, EPI_ISL_858036, EPI_ISL_858038, EPI_ISL_858039, EPI_ISL_858040, EPI_ISL_858041, EPI_ISL_858042, EPI_ISL_858043, EPI_ISL_858044, EPI_ISL_858045, EPI_ISL_858046, EPI_ISL_858047, EPI_ISL_858048, EPI_ISL_858049, EPI_ISL_858050, EPI_ISL_858051, EPI_ISL_858052, EPI_ISL_858053, EPI_ISL_858054, EPI_ISL_858055, EPI_ISL_858056, EPI_ISL_858057, EPI_ISL_858058, EPI_ISL_858059, EPI_ISL_858060, EPI_ISL_858061, EPI_ISL_858062, EPI_ISL_858063, EPI_ISL_858316                                                                                                                                                                                                                                                                                                                                                                                                                                                                                                                                                                                                                                                                                                                                                                                                                                                                                                                                                                                                                                                                                                                                                                                                                                                                                                                                                                                                                                                                                                                                                                                                                                                                                                                                                                                                                                                                                                                                                                                                                                                                                                                                                                                                                                                                                                                                                                                                                                                                                                                                                                                                                                                                                                                                                                                                                                                                                                                                                                                                                                                                                                                                                                                                                                                                                                                                                                                                                                                                                                                                                                                                                                                                                                                                                                                                                                                                                                                                                                                                                                                                                                                                                                                                                                                                                                                                                                                                                                                                                                                                                                                                                                                                                                                                                                                                                                                                                                                                                                                                                                                                                                                                                                                                                                                                                                                                                                                                                                                                                                                                                                                                                                                                                                                                                                                                                                                                                                                                                                                                                                                                                                                                                                                                                                                                                                                                                                                                                                                                                                                                                                                                                                                                                                                                                                                                                                                                                                                                                                                                                                                                                                                                                                                                                                                                                                                                                                                                                                                                                                                                                                                                                                                                                                                                                                                                                                                                                                                                                                                                                                                                                                                                                                                                                                                                                                                                                                                                                                                                                                                                                                                                                                                                                                                                                                                                                                                                                                                                                                                                                                                                                                                                                                                                                                                                                                                                                                                                                                                                                                                                                                                                                                                                                                                                                                                                                                                                                                                                                                                                                                                                                                                                                                                                                                                                                                                                                                                                                                                                                                                                                                                                                                                                                                                                                                                                                                                                                                                                                                                                                                                                                                                                                                                                                                                                                                                                                                                                                                                                                                                                                                                                                                                                                                                                                                                                                                                                                                                                                                                         | see above                                                                 | Lighthouse Lab in Glasgow                                                  | Wellcome Sanger Institute for the COVID-19 Genomics UK (COG-UK) Consortium                                                                                                                                                                                                                                  | Harper VanSteenhouse, Yumi Kasai, David Gray, Carol Clugston, Anna Dominiczak and Alex Alderton, Roberto Amato, Sonia Goncalves, Ewan Harrison, David K. Jackson, Ian Johnston, Dominic Kwiatkowski, Cordelia Langford, John Sillitoe on behalf of the Wellcome Sanger Institute COVID-19 Surveillance Team |
| EPI_ISL_860688                                                                                                                                                                                                                                                                                                                                                                                                                                                                                                                                                                                                                                                                                                                                                                                                                                                                                                                                                                                                                                                                                                                                                                                                                                                                                                                                                                                                                                                                                                                                                                                                                                                                                                                                                                                                                                                                                                                                                                                                                                                                                                                                                                                                                                                                                                                                                                                                                                                                                                                                                                                                                                                                                                                                                                                                                                                                                                                                                                                                                                                                                                                                                                                                                                                                                                                                                                                                                                                                                                                                                                                                                                                                                                                                                                                                                                                                                                                                                                                                                                                                                                                                                                                                                                                                                                                                                                                                                                                                                                                                                                                                                                                                                                                                                                                                                                                                                                                                                                                                                                                                                                                                                                                                                                                                                                                                                                                                                                                                                                                                                                                                                                                                                                                                                                                                                                                                                                                                                                                                                                                                                                                                                                                                                                                                                                                                                                                                                                                                                                                                                                                                                                                                                                                                                                                                                                                                                                                                                                                                                                                                                                                                                                                                                                                                                                                                                                                                                                                                                                                                                                                                                                                                                                                                                                                                                                                                                                                                                                                                                                                                                                                                                                                                                                                                                                                                                                                                                                                                                                                                                                                                                                                                                                                                                                                                                                                                                                                                                                                                                                                                                                                                                                                                                                                                                                                                                                                                                                                                                                                                                                                                                                                                                                                                                                                                                                                                                                                                                                                                                                                                                                                                                                                                                                                                                                                                                                                                                                                                                                                                                                                                                                                                                                                                                                                                                                                                                                                                                                                                                                                                                                                                                                                                                                                                                                                                                                                                                                                                                                                                                                                                                                                                                                                                                                                                                                                                                                                                                                                                                                                                                                                                                                                                                                                                                                                                                                                                                                                                                                                                                                                                                                                                                                                                                                                                         | Respiratory Virus Unit, National Infection Service, Public Health England | COVID-19 Genomics UK (COG-UK) Consortium                                   | PHE Covid Sequencing Team                                                                                                                                                                                                                                                                                   |                                                                                                                                                                                                                                                                                                             |
| EPI_ISL_862886, EPI_ISL_862887, EPI_ISL_862888, EPI_ISL_862889, EPI_ISL_862890, EPI_ISL_862891, EPI_ISL_862892, EPI_ISL_862893, EPI_ISL_862894, EPI_ISL_862895, EPI_ISL_862896, EPI_ISL_862897, EPI_ISL_862898, EPI_ISL_862899, EPI_ISL_862900, EPI_ISL_862901, EPI_ISL_862902, EPI_ISL_862903, EPI_ISL_862904, EPI_ISL_862905, EPI_ISL_862906, EPI_ISL_862907, EPI_ISL_862908, EPI_ISL_862909, EPI_ISL_862910, EPI_ISL_862911, EPI_ISL_862912, EPI_ISL_862913, EPI_ISL_862914, EPI_ISL_862915, EPI_ISL_862916, EPI_ISL_862917, EPI_ISL_862918, EPI_ISL_862919, EPI_ISL_862920, EPI_ISL_862921, EPI_ISL_862922, EPI_ISL_862923, EPI_ISL_862924, EPI_ISL_862925, EPI_ISL_862926, EPI_ISL_862927, EPI_ISL_862928, EPI_ISL_862929, EPI_ISL_862930, EPI_ISL_862931, EPI_ISL_862932, EPI_ISL_862933, EPI_ISL_862934, EPI_ISL_862935, EPI_ISL_862936, EPI_ISL_862937, EPI_ISL_862938, EPI_ISL_862939, EPI_ISL_862940, EPI_ISL_862941, EPI_ISL_862942, EPI_ISL_862943, EPI_ISL_862944, EPI_ISL_862945, EPI_ISL_862946, EPI_ISL_862947, EPI_ISL_862948, EPI_ISL_862949, EPI_ISL_862950, EPI_ISL_862951, EPI_ISL_862952, EPI_ISL_862953, EPI_ISL_862954, EPI_ISL_862955, EPI_ISL_862956, EPI_ISL_862957, EPI_ISL_862958, EPI_ISL_862959, EPI_ISL_862960, EPI_ISL_862961, EPI_ISL_862962, EPI_ISL_862963, EPI_ISL_862964, EPI_ISL_862965, EPI_ISL_862966, EPI_ISL_862967, EPI_ISL_862968, EPI_ISL_862969, EPI_ISL_862970, EPI_ISL_862971, EPI_ISL_862972, EPI_ISL_862973, EPI_ISL_862974, EPI_ISL_862975, EPI_ISL_862976, EPI_ISL_862977, EPI_ISL_862978, EPI_ISL_862979, EPI_ISL_862980, EPI_ISL_862981, EPI_ISL_862982, EPI_ISL_862983, EPI_ISL_862984, EPI_ISL_862985, EPI_ISL_862986, EPI_ISL_862987, EPI_ISL_862988, EPI_ISL_862989, EPI_ISL_862990, EPI_ISL_862991, EPI_ISL_862992, EPI_ISL_862993, EPI_ISL_862994, EPI_ISL_862995, EPI_ISL_862996, EPI_ISL_862997, EPI_ISL_862998, EPI_ISL_862999, EPI_ISL_863000, EPI_ISL_863001, EPI_ISL_863002, EPI_ISL_863003, EPI_ISL_863004, EPI_ISL_863005, EPI_ISL_863006, EPI_ISL_863007, EPI_ISL_863008, EPI_ISL_863009, EPI_ISL_863010, EPI_ISL_863011, EPI_ISL_863012, EPI_ISL_863013, EPI_ISL_863014, EPI_ISL_863015, EPI_ISL_863016, EPI_ISL_863017, EPI_ISL_863018, EPI_ISL_863019, EPI_ISL_863020, EPI_ISL_863021, EPI_ISL_863022, EPI_ISL_863023, EPI_ISL_863024, EPI_ISL_863025, EPI_ISL_863026, EPI_ISL_863027, EPI_ISL_863028, EPI_ISL_863029, EPI_ISL_863030, EPI_ISL_863031, EPI_ISL_863032, EPI_ISL_863033, EPI_ISL_863034, EPI_ISL_863035, EPI_ISL_863036, EPI_ISL_863037, EPI_ISL_863038, EPI_ISL_863039, EPI_ISL_863040, EPI_ISL_863041, EPI_ISL_863042, EPI_ISL_863043, EPI_ISL_863044, EPI_ISL_863045, EPI_ISL_863046, EPI_ISL_863047, EPI_ISL_863048, EPI_ISL_863049, EPI_ISL_863050, EPI_ISL_863051, EPI_ISL_863052, EPI_ISL_863053, EPI_ISL_863054, EPI_ISL_863055, EPI_ISL_863056, EPI_ISL_863057, EPI_ISL_863058, EPI_ISL_863059, EPI_ISL_863060, EPI_ISL_863061, EPI_ISL_863062, EPI_ISL_863063, EPI_ISL_863064, EPI_ISL_863065, EPI_ISL_863066, EPI_ISL_863067, EPI_ISL_863068, EPI_ISL_863069, EPI_ISL_863070, EPI_ISL_863071, EPI_ISL_863072, EPI_ISL_863073, EPI_ISL_863074, EPI_ISL_863075, EPI_ISL_863076, EPI_ISL_863077, EPI_ISL_863078, EPI_ISL_863079, EPI_ISL_863080, EPI_ISL_863081, EPI_ISL_863082, EPI_ISL_863083, EPI_ISL_863084, EPI_ISL_863085, EPI_ISL_863086, EPI_ISL_863087, EPI_ISL_863088, EPI_ISL_863089, EPI_ISL_863090, EPI_ISL_863091, EPI_ISL_863092, EPI_ISL_863093, EPI_ISL_863094, EPI_ISL_863095, EPI_ISL_863096, EPI_ISL_863097, EPI_ISL_863098, EPI_ISL_863099, EPI_ISL_863100, EPI_ISL_863101, EPI_ISL_863102, EPI_ISL_863103, EPI_ISL_863104, EPI_ISL_863105, EPI_ISL_863106, EPI_ISL_863107, EPI_ISL_863108, EPI_ISL_863109, EPI_ISL_863110, EPI_ISL_863111, EPI_ISL_863112, EPI_ISL_863113, EPI_ISL_863114, EPI_ISL_863115, EPI_ISL_863116, EPI_ISL_863117, EPI_ISL_863118, EPI_ISL_863119, EPI_ISL_863120, EPI_ISL_863121, EPI_ISL_863122, EPI_ISL_863123, EPI_ISL_863124, EPI_ISL_863125, EPI_ISL_863126, EPI_ISL_863127, EPI_ISL_863128, EPI_ISL_863129, EPI_ISL_863130, EPI_ISL_863131, EPI_ISL_863132, EPI_ISL_863133, EPI_ISL_863134, EPI_ISL_863135, EPI_ISL_863136, EPI_ISL_863137, EPI_ISL_863138, EPI_ISL_863139, EPI_ISL_863140, EPI_ISL_863141, EPI_ISL_863142, EPI_ISL_863143, EPI_ISL_863144, EPI_ISL_863145, EPI_ISL_863146, EPI_ISL_863147, EPI_ISL_863148, EPI_ISL_863149, EPI_ISL_863150, EPI_ISL_863151, EPI_ISL_863152, EPI_ISL_863153, EPI_ISL_863154, EPI_ISL_863155, EPI_ISL_863156, EPI_ISL_863157, EPI_ISL_863158, EPI_ISL_863159, EPI_ISL_863160, EPI_ISL_863161, EPI_ISL_863162, EPI_ISL_863163, EPI_ISL_863164, EPI_ISL_863165, EPI_ISL_863166, EPI_ISL_863167, EPI_ISL_863168, EPI_ISL_863169, EPI_ISL_863170, EPI_ISL_863171, EPI_ISL_863172, EPI_ISL_863173, EPI_ISL_863174, EPI_ISL_863175, EPI_ISL_863176, EPI_ISL_863177, EPI_ISL_863178, EPI_ISL_863179, EPI_ISL_863180, EPI_ISL_863181, EPI_ISL_863182, EPI_ISL_863183, EPI_ISL_863184, EPI_ISL_863185, EPI_ISL_863186, EPI_ISL_863187, EPI_ISL_863188, EPI_ISL_863189, EPI_ISL_863190, EPI_ISL_863191, EPI_ISL_863192, EPI_ISL_863193, EPI_ISL_863194, EPI_ISL_863195, EPI_ISL_863196, EPI_ISL_863197, EPI_ISL_863198, EPI_ISL_863199, EPI_ISL_863200, EPI_ISL_863201, EPI_ISL_863202, EPI_ISL_863203, EPI_ISL_863204, EPI_ISL_863205, EPI_ISL_863206, EPI_ISL_863207, EPI_ISL_863208, EPI_ISL_863209, EPI_ISL_863210, EPI_ISL_863211, EPI_ISL_863212, EPI_ISL_863213, EPI_ISL_863214, EPI_ISL_863215, EPI_ISL_863216, EPI_ISL_863217, EPI_ISL_863218, EPI_ISL_863219, EPI_ISL_863220, EPI_ISL_863221, EPI_ISL_863222, EPI_ISL_863223, EPI_ISL_863224, EPI_ISL_863225, EPI_ISL_863226, EPI_ISL_863227, EPI_ISL_863228, EPI_ISL_863229, EPI_ISL_863230, EPI_ISL_863231, EPI_ISL_863232, EPI_ISL_863233, EPI_ISL_863234, EPI_ISL_863235, EPI_ISL_863236, EPI_ISL_863237, EPI_ISL_863238, EPI_ISL_863239, EPI_ISL_863240, EPI_ISL_863241, EPI_ISL_863242, EPI_ISL_863243, EPI_ISL_863244, EPI_ISL_863245, EPI_ISL_863246, EPI_ISL_863247, EPI_ISL_863248, EPI_ISL_863249, EPI_ISL_863250, EPI_ISL_863251, EPI_ISL_863252, EPI_ISL_863253, EPI_ISL_863254, EPI_ISL_863255, EPI_ISL_863256, EPI_ISL_863257, EPI_ISL_863258, EPI_ISL_863259, EPI_ISL_863260, EPI_ISL_863261, EPI_ISL_863262, EPI_ISL_863263, EPI_ISL_863264, EPI_ISL_863265, EPI_ISL_863266, EPI_ISL_863267, EPI_ISL_863268, EPI_ISL_863269, EPI_ISL_863270, EPI_ISL_863271, EPI_ISL_863272, EPI_ISL_863273, EPI_ISL_863274, EPI_ISL_863275, EPI_ISL_863276, EPI_ISL_863277, EPI_ISL_863278, EPI_ISL_863279, EPI_ISL_863280, EPI_ISL_863281, EPI_ISL_863282, EPI_ISL_863283, EPI_ISL_863284, EPI_ISL_863285, EPI_ISL_863286, EPI_ISL_863287, EPI_ISL_863288, EPI_ISL_863289, EPI_ISL_863290, EPI_ISL_863291, EPI_ISL_863292, EPI_ISL_863293, EPI_ISL_863294, EPI_ISL_863295, EPI_ISL_863296, EPI_ISL_863297, EPI_ISL_863298, EPI_ISL_863299, EPI_ISL_863300, EPI_ISL_863301, EPI_ISL_863302, EPI_ISL_863303, EPI_ISL_863304, EPI_ISL_863305, EPI_ISL_863306, EPI_ISL_863307, EPI_ISL_863308, EPI_ISL_863309, EPI_ISL_863310, EPI_ISL_863311, EPI_ISL_863312, EPI_ISL_863313, EPI_ISL_863314, EPI_ISL_863315, EPI_ISL_863316, EPI_ISL_863317, EPI_ISL_863318, EPI_ISL_863319, EPI_ISL_863320, EPI_ISL_863321, EPI_ISL_863322, EPI_ISL_863323, EPI_ISL_863324, EPI_ISL_863325, EPI_ISL_863326, EPI_ISL_863327, EPI_ISL_863328, EPI_ISL_863329, EPI_ISL_863330, EPI_ISL_863331, EPI_ISL_863332, EPI_ISL_863333, EPI_ISL_863334, EPI_ISL_863335, EPI_ISL_863336, EPI_ISL_863337, EPI_ISL_863338, EPI_ISL_863339, EPI_ISL_863340, EPI_ISL_863341, EPI_ISL_863342, EPI_ISL_863343, EPI_ISL_863344, EPI_ISL_863345, EPI_ISL_863346, EPI_ISL_863347, EPI_ISL_863348, EPI_ISL_863349, EPI_ISL_863350, EPI_ISL_863351, EPI_ISL_863352, EPI_ISL_863353, EPI_ISL_863354, EPI_ISL_863355, EPI_ISL_863356, EPI_ISL_863357, EPI_ISL_863358, EPI_ISL_863359, EPI_ISL_863360, EPI_ISL_863361, EPI_ISL_863362, EPI_ISL_863363, EPI_ISL_863364, EPI_ISL_863365, EPI_ISL_863366, EPI_ISL_863367, EPI_ISL_863368, EPI_ISL_863369, EPI_ISL_863370, EPI_ISL_863371, EPI_ISL_863372, EPI_ISL_863373, EPI_ISL_863374, EPI_ISL_863375, EPI_ISL_863376, EPI_ISL_863377, EPI_ISL_863378, EPI_ISL_863379, EPI_ISL_863380, EPI_ISL_863381, EPI_ISL_863382, EPI_ISL_863383, EPI_ISL_863384, EPI_ISL_863385, EPI_ISL_863386, EPI_ISL_863387, EPI_ISL_863388, EPI_ISL_863389, EPI_ISL_863390, EPI_ISL_863391, EPI_ISL_863392, EPI_ISL_863393, EPI_ISL_863394, EPI_ISL_863395, EPI_ISL_863396, EPI_ISL_863397, EPI_ISL_863398, EPI_ISL_863399, EPI_ISL_863400, EPI_ISL_863401, EPI_ISL_863402, EPI_ISL_863403, EPI_ISL_863404, EPI_ISL_863405, EPI_ISL_863406, EPI_ISL_863407, EPI_ISL_863408, EPI_ISL_863409, EPI_ISL_863410, EPI_ISL_863411, EPI_ISL_863412, EPI_ISL_863413, EPI_ISL_863414, EPI_ISL_863415, EPI_ISL_863416, EPI_ISL_863417, EPI_ISL_863418, EPI_ISL_863419, EPI_ISL_863420, EPI_ISL_863421, EPI_ISL_863422, EPI_ISL_863423, EPI_ISL_863424, EPI_ISL_863425, EPI_ISL_863426, EPI_ISL_863427, EPI_ISL_863428, EPI_ISL_863429, EPI_ISL_863430, EPI_ISL_863431, EPI_ISL_863432, EPI_ISL_863433, EPI_ISL_863434, EPI_ISL_863435, EPI_ISL_863436, EPI_ISL_863437, EPI_ISL_863438, EPI_ISL_863439, EPI_ISL_863440, EPI_ISL_863441, EPI_ISL_863442, EPI_ISL_863443, EPI_ISL_863444, EPI_ISL_863445, EPI_ISL_863446, EPI_ISL_863447, EPI_ISL_863448, EPI_ISL_863449, EPI_ISL_863450, EPI_ISL_863451, EPI_ISL_863452, EPI_ISL_863453, EPI_ISL_863454, EPI_ISL_863455, EPI_ISL_863456, EPI_ISL_863457, EPI_ISL_863458, EPI_ISL_863459, EPI_ISL_863460, EPI_ISL_863461, EPI_ISL_863462, EPI_ISL_863463, EPI_ISL_863464, EPI_ISL_863465, EPI_ISL_863466, EPI_ISL_863467, EPI_ISL_863468, EPI_ISL_863469, EPI_ISL_863470, EPI_ISL_863471, EPI_ISL_863472, EPI_ISL_863473, EPI_ISL_863474, EPI_ISL_863475, EPI_ISL_863476, EPI_ISL_863477, EPI_ISL_863478, EPI_ISL_863479, EPI_ISL_863480, EPI_ISL_863481, EPI_ISL_863482, EPI_ISL_863483, EPI_ISL_863484, EPI_ISL_863485, EPI_ISL_863486, EPI_ISL_863487, EPI_ISL_863488, EPI_ISL_863489, EPI_ISL_863490, EPI_ISL_863491, EPI_ISL_863492, EPI_ISL_863493, EPI_ISL_863494, EPI_ISL_863495, EPI_ISL_863496, EPI_ISL_863497, EPI_ISL_863498, EPI_ISL_863499, EPI_ISL_863500, EPI_ISL_863501, EPI_ISL_863502, EPI_ISL_863503, EPI_ISL_863504, EPI_ISL_863505, EPI_ISL_863506, EPI_ISL_863507, EPI_ISL_863508, EPI_ISL_863509, EPI_ISL_863510, EPI_ISL_863511, EPI_ISL_863512, EPI_ISL_863513, EPI_ISL_863514, EPI_ISL_863515, EPI_ISL_863516, EPI_ISL_863517, EPI_ISL_863518, EPI_ISL_863519, EPI_ISL_863520, EPI_ISL_863521, EPI_ISL_863522, EPI_ISL_863523, EPI_ISL_863524, EPI_ISL_863525, EPI_ISL_863526, EPI_ISL_863527, EPI_ISL_863528, EPI_ISL_863529, EPI_ISL_863530, EPI_ISL_863531, EPI_ISL_863532, EPI_ISL_863533, EPI_ISL_863534, EPI_ISL_863535, EPI_ISL_863536, EPI_ISL_863537, EPI_ISL_863538, EPI_ISL_863539, EPI_ISL_863540, EPI_ISL_863541, EPI_ISL_863542, EPI_ISL_863543, EPI_ISL_863544, EPI_ISL_863545, EPI_ISL_863546, EPI_ISL_863547, EPI_ISL_863548, EPI_ISL_863549, EPI_ISL_863550, EPI_ISL_863551, EPI_ISL_863552, EPI_ISL_863553, EPI_ISL_863554, EPI_ISL_863555, EPI_ISL_863556, EPI_ISL_863557, EPI_ISL_863558, EPI_ISL_863559, EPI_ISL_863560, EPI_ISL_863561, EPI_ISL_863562, EPI_ISL_863563, EPI_ISL_863564, EPI_ISL_863565, EPI_ISL_863566, EPI_ISL_863567, EPI_ISL_863568, EPI_ISL_863569, EPI_ISL_863570, EPI_ISL_863571, EPI_ISL_863572, EPI_ISL_863573, EPI_ISL_863574, EPI_ISL_863575, EPI_ISL_863576, EPI_ISL_863577, EPI_ISL_863578, EPI_ISL_863579, EPI_ISL_863580, EPI_ISL_863581, EPI_ISL_863582, EPI_ISL_863583, EPI_ISL_863584, EPI_ISL_863585, EPI_ISL_863586, EPI_ISL_863587, EPI_ISL_863588, EPI_ISL_863589, EPI_ISL_863590, EPI_ISL_863591, EPI_ISL_863592, EPI_ISL_863593, EPI_ISL_863594, EPI_ISL_863595, EPI_ISL_863596, EPI_ISL_863597, EPI_ISL_863598, EPI_ISL_863599, EPI_ISL_863600, EPI_ISL_863601, EPI_ISL_863602, EPI_ISL_863603, EPI_ISL_863604, EPI_ISL_863605, EPI_ISL_863606, EPI_ISL_863607, EPI_ISL_863608, EPI_ISL_863609, EPI_ISL_863610, EPI_ISL_863611, EPI_ISL_863612, EPI_ISL_863613, EPI_ISL_863614, EPI_ISL_863615, EPI_ISL_863616, EPI_ISL_863617, EPI_ISL_863618, EPI_ISL_863619, EPI_ISL_863620, EPI_ISL_863621, EPI_ISL_863622, EPI_ISL_863623, EPI_ISL_863624, EPI_ISL_863625, EPI_ISL_863626, EPI_ISL_863627, EPI_ISL_863628, EPI_ISL_863629, EPI_ISL_863630, EPI_ISL_863631, EPI_ISL_863632, EPI_ISL_863633, EPI_ISL_863634, EPI_ISL_863635, EPI_ISL_863636, EPI_ISL_863637, EPI_ISL_863638, EPI_ISL_863639, EPI_ISL_863640, EPI_ISL_863641, EPI_ISL_863642, EPI_ISL_863643, EPI_ISL_863644, EPI_ISL_863645, EPI_ISL_863646, EPI_ISL_863647, EPI_ISL_863648, EPI_ISL_863649, EPI_ISL_863650, EPI_ISL_863651, EPI_ISL_863652, EPI_ISL_863653, EPI_ISL_863654, EPI_IS |                                                                           |                                                                            |                                                                                                                                                                                                                                                                                                             |                                                                                                                                                                                                                                                                                                             |

[illegible]



|                                                                                                                                                                                                                                                                                                                                                                                                                                                                                                                                                                                                                                                                                                                                                                                                                                                                                                                                                                                                                                                                                                                                                                                                                                                                                                                                                                                                                                                                                                                                                                                                                                                                                                                                                                                                                                                                                                                                                                                                                                                                                                                                                                                                                                                                                                                                                                                                                                                                                                                                                                                                                                                                                                                                                                                                                                                                                                                                                                                                                                                                                                                                                                                                                                                                                                                                                                                                                                                                                                                                                                                                                                                                                                                                                                                                                                                                                                                                                                                                                                                                                                                                                                                                                                                                                                                                                                                                                                                                                                                                                                                                                                                                                                                                                                                                                                                                                                                                                                                                                                                                                                                                                                                                                                                                                                                                                                                                                                                                                                                                                                                                                                                                                                                                                                                                                                                                                                                                                                                                                                                                                                                                                                                                                                                                                                                                                                                                                                                                                                                                                                                                                                                                                                                                                                                                                                                                                                                                                                                                                                                                                                                                                                                                                                                                                                                                                                                                                                                                                                                                                                                                                                                                                                                                                                                                                                                                                                                                                                                                                                                                                               |                                                                                                                                  |                                          |                                                                                                                                                                                                                                                                                                                                                                                                                                                                                                                                                                                                                                                                                           |
|-----------------------------------------------------------------------------------------------------------------------------------------------------------------------------------------------------------------------------------------------------------------------------------------------------------------------------------------------------------------------------------------------------------------------------------------------------------------------------------------------------------------------------------------------------------------------------------------------------------------------------------------------------------------------------------------------------------------------------------------------------------------------------------------------------------------------------------------------------------------------------------------------------------------------------------------------------------------------------------------------------------------------------------------------------------------------------------------------------------------------------------------------------------------------------------------------------------------------------------------------------------------------------------------------------------------------------------------------------------------------------------------------------------------------------------------------------------------------------------------------------------------------------------------------------------------------------------------------------------------------------------------------------------------------------------------------------------------------------------------------------------------------------------------------------------------------------------------------------------------------------------------------------------------------------------------------------------------------------------------------------------------------------------------------------------------------------------------------------------------------------------------------------------------------------------------------------------------------------------------------------------------------------------------------------------------------------------------------------------------------------------------------------------------------------------------------------------------------------------------------------------------------------------------------------------------------------------------------------------------------------------------------------------------------------------------------------------------------------------------------------------------------------------------------------------------------------------------------------------------------------------------------------------------------------------------------------------------------------------------------------------------------------------------------------------------------------------------------------------------------------------------------------------------------------------------------------------------------------------------------------------------------------------------------------------------------------------------------------------------------------------------------------------------------------------------------------------------------------------------------------------------------------------------------------------------------------------------------------------------------------------------------------------------------------------------------------------------------------------------------------------------------------------------------------------------------------------------------------------------------------------------------------------------------------------------------------------------------------------------------------------------------------------------------------------------------------------------------------------------------------------------------------------------------------------------------------------------------------------------------------------------------------------------------------------------------------------------------------------------------------------------------------------------------------------------------------------------------------------------------------------------------------------------------------------------------------------------------------------------------------------------------------------------------------------------------------------------------------------------------------------------------------------------------------------------------------------------------------------------------------------------------------------------------------------------------------------------------------------------------------------------------------------------------------------------------------------------------------------------------------------------------------------------------------------------------------------------------------------------------------------------------------------------------------------------------------------------------------------------------------------------------------------------------------------------------------------------------------------------------------------------------------------------------------------------------------------------------------------------------------------------------------------------------------------------------------------------------------------------------------------------------------------------------------------------------------------------------------------------------------------------------------------------------------------------------------------------------------------------------------------------------------------------------------------------------------------------------------------------------------------------------------------------------------------------------------------------------------------------------------------------------------------------------------------------------------------------------------------------------------------------------------------------------------------------------------------------------------------------------------------------------------------------------------------------------------------------------------------------------------------------------------------------------------------------------------------------------------------------------------------------------------------------------------------------------------------------------------------------------------------------------------------------------------------------------------------------------------------------------------------------------------------------------------------------------------------------------------------------------------------------------------------------------------------------------------------------------------------------------------------------------------------------------------------------------------------------------------------------------------------------------------------------------------------------------------------------------------------------------------------------------------------------------------------------------------------------------------------------------------------------------------------------------------------------------------------------------------------------------------------------------------------------------------------------------------------------------------------------------------------------------------------------------------------------------------------------------------------------------------------------------------------------------------------------------------------------------|----------------------------------------------------------------------------------------------------------------------------------|------------------------------------------|-------------------------------------------------------------------------------------------------------------------------------------------------------------------------------------------------------------------------------------------------------------------------------------------------------------------------------------------------------------------------------------------------------------------------------------------------------------------------------------------------------------------------------------------------------------------------------------------------------------------------------------------------------------------------------------------|
| University of Edinburgh                                                                                                                                                                                                                                                                                                                                                                                                                                                                                                                                                                                                                                                                                                                                                                                                                                                                                                                                                                                                                                                                                                                                                                                                                                                                                                                                                                                                                                                                                                                                                                                                                                                                                                                                                                                                                                                                                                                                                                                                                                                                                                                                                                                                                                                                                                                                                                                                                                                                                                                                                                                                                                                                                                                                                                                                                                                                                                                                                                                                                                                                                                                                                                                                                                                                                                                                                                                                                                                                                                                                                                                                                                                                                                                                                                                                                                                                                                                                                                                                                                                                                                                                                                                                                                                                                                                                                                                                                                                                                                                                                                                                                                                                                                                                                                                                                                                                                                                                                                                                                                                                                                                                                                                                                                                                                                                                                                                                                                                                                                                                                                                                                                                                                                                                                                                                                                                                                                                                                                                                                                                                                                                                                                                                                                                                                                                                                                                                                                                                                                                                                                                                                                                                                                                                                                                                                                                                                                                                                                                                                                                                                                                                                                                                                                                                                                                                                                                                                                                                                                                                                                                                                                                                                                                                                                                                                                                                                                                                                                                                                                                                       |                                                                                                                                  |                                          |                                                                                                                                                                                                                                                                                                                                                                                                                                                                                                                                                                                                                                                                                           |
| EPI_ISL_865270, EPI_ISL_865271, EPI_ISL_865272, EPI_ISL_865273, EPI_ISL_865274, EPI_ISL_865275, EPI_ISL_865276, EPI_ISL_865277, EPI_ISL_865280, EPI_ISL_865281, EPI_ISL_865282, EPI_ISL_865284, EPI_ISL_865285, EPI_ISL_865286, EPI_ISL_865287, EPI_ISL_865288, EPI_ISL_865289, EPI_ISL_865290, EPI_ISL_865291, EPI_ISL_865292, EPI_ISL_865293, EPI_ISL_865294, EPI_ISL_865295, EPI_ISL_865296, EPI_ISL_865297, EPI_ISL_865298, EPI_ISL_865300, EPI_ISL_865301, EPI_ISL_865302, EPI_ISL_865303, EPI_ISL_865304, EPI_ISL_865305, EPI_ISL_865306, EPI_ISL_865307, EPI_ISL_865308, EPI_ISL_865309, EPI_ISL_865310, EPI_ISL_865311, EPI_ISL_865312, EPI_ISL_865313, EPI_ISL_865314, EPI_ISL_865315, EPI_ISL_865317, EPI_ISL_865318, EPI_ISL_865319, EPI_ISL_865320, EPI_ISL_865321, EPI_ISL_865322, EPI_ISL_865324, EPI_ISL_865326, EPI_ISL_865327, EPI_ISL_865328, EPI_ISL_865341, EPI_ISL_865342, EPI_ISL_865343, EPI_ISL_865344, EPI_ISL_865345, EPI_ISL_865346, EPI_ISL_865347, EPI_ISL_865348, EPI_ISL_865349, EPI_ISL_865350, EPI_ISL_865351, EPI_ISL_865353, EPI_ISL_865449                                                                                                                                                                                                                                                                                                                                                                                                                                                                                                                                                                                                                                                                                                                                                                                                                                                                                                                                                                                                                                                                                                                                                                                                                                                                                                                                                                                                                                                                                                                                                                                                                                                                                                                                                                                                                                                                                                                                                                                                                                                                                                                                                                                                                                                                                                                                                                                                                                                                                                                                                                                                                                                                                                                                                                                                                                                                                                                                                                                                                                                                                                                                                                                                                                                                                                                                                                                                                                                                                                                                                                                                                                                                                                                                                                                                                                                                                                                                                                                                                                                                                                                                                                                                                                                                                                                                                                                                                                                                                                                                                                                                                                                                                                                                                                                                                                                                                                                                                                                                                                                                                                                                                                                                                                                                                                                                                                                                                                                                                                                                                                                                                                                                                                                                                                                                                                                                                                                                                                                                                                                                                                                                                                                                                                                                                                                                                                                                                                                                                                                                                                                                                                                                                                                                                                                                                                                                                                                                                                                                                |                                                                                                                                  |                                          |                                                                                                                                                                                                                                                                                                                                                                                                                                                                                                                                                                                                                                                                                           |
| see above                                                                                                                                                                                                                                                                                                                                                                                                                                                                                                                                                                                                                                                                                                                                                                                                                                                                                                                                                                                                                                                                                                                                                                                                                                                                                                                                                                                                                                                                                                                                                                                                                                                                                                                                                                                                                                                                                                                                                                                                                                                                                                                                                                                                                                                                                                                                                                                                                                                                                                                                                                                                                                                                                                                                                                                                                                                                                                                                                                                                                                                                                                                                                                                                                                                                                                                                                                                                                                                                                                                                                                                                                                                                                                                                                                                                                                                                                                                                                                                                                                                                                                                                                                                                                                                                                                                                                                                                                                                                                                                                                                                                                                                                                                                                                                                                                                                                                                                                                                                                                                                                                                                                                                                                                                                                                                                                                                                                                                                                                                                                                                                                                                                                                                                                                                                                                                                                                                                                                                                                                                                                                                                                                                                                                                                                                                                                                                                                                                                                                                                                                                                                                                                                                                                                                                                                                                                                                                                                                                                                                                                                                                                                                                                                                                                                                                                                                                                                                                                                                                                                                                                                                                                                                                                                                                                                                                                                                                                                                                                                                                                                                     | Liverpool Clinical Laboratories                                                                                                  | COVID-19 Genomics UK (COG-UK) Consortium | Sam Haldenby, Anita Lucaci, Steve Paterson, Julian Hiscox, Alistair Darby, M Almsaud, A Alrezaihi, Muhannad Alruwaili, Stuart D Armstrong, Jones Benjamin, Eleanor G Bentley, Anu Chawla, Jordan J Clark, Angela Cowell, Richard Eccles, Isabel Garcia-Dorival, Matthew Gemmell, Alessandro Gerada, PKF Gilmore, Richard Gregory, Ximeng Han, Catherine Hartley, Margaret Hughes, Miren Iturriza-Gomara, James Johnson, L Luu, Jenifer Manson, Charlotte Nelson, Elaine O'Toole, Cassie Olateju, Rebekah Penrice-Randal , Lucille Rainbow, N.P Randle, Trevor Ian Robinson, Parul Sharma, Ghada T Shawli, James P Stewart, Neil Swainston, Ecaterina Varnos, Joanne Watts, Mark Whitehead |
| EPI_ISL_865847                                                                                                                                                                                                                                                                                                                                                                                                                                                                                                                                                                                                                                                                                                                                                                                                                                                                                                                                                                                                                                                                                                                                                                                                                                                                                                                                                                                                                                                                                                                                                                                                                                                                                                                                                                                                                                                                                                                                                                                                                                                                                                                                                                                                                                                                                                                                                                                                                                                                                                                                                                                                                                                                                                                                                                                                                                                                                                                                                                                                                                                                                                                                                                                                                                                                                                                                                                                                                                                                                                                                                                                                                                                                                                                                                                                                                                                                                                                                                                                                                                                                                                                                                                                                                                                                                                                                                                                                                                                                                                                                                                                                                                                                                                                                                                                                                                                                                                                                                                                                                                                                                                                                                                                                                                                                                                                                                                                                                                                                                                                                                                                                                                                                                                                                                                                                                                                                                                                                                                                                                                                                                                                                                                                                                                                                                                                                                                                                                                                                                                                                                                                                                                                                                                                                                                                                                                                                                                                                                                                                                                                                                                                                                                                                                                                                                                                                                                                                                                                                                                                                                                                                                                                                                                                                                                                                                                                                                                                                                                                                                                                                                | University College London, Great Ormond Street Hospital for Children NHS Foundation Trust, Imperial College Healthcare NHS Trust | COVID-19 Genomics UK (COG-UK) Consortium | Sergi Castellano, Rachel Williams, Mark Kristiansen, Paola Resende Silva, Sunando Roy, Tony Brooks, Helena Tutill, Paola Niola, Patricia Dyal, Charlotte Williams, Leysa Forrest, Yasmin Panchbhaya, Jacqueline Findlay, Samuel Weeks, Julianne Brown, Kathryn Harris, Paul Randell, James Price, Alison Holmes, Judith Breuer                                                                                                                                                                                                                                                                                                                                                            |
| EPI_ISL_866080, EPI_ISL_866082, EPI_ISL_866083, EPI_ISL_866085, EPI_ISL_866086, EPI_ISL_866087, EPI_ISL_866088, EPI_ISL_866089, EPI_ISL_866090, EPI_ISL_866091, EPI_ISL_866092, EPI_ISL_866093, EPI_ISL_866094, EPI_ISL_866095, EPI_ISL_866096, EPI_ISL_866097, EPI_ISL_866098, EPI_ISL_866099, EPI_ISL_866100, EPI_ISL_866101, EPI_ISL_866102, EPI_ISL_866103, EPI_ISL_866104, EPI_ISL_866105, EPI_ISL_866112, EPI_ISL_866113, EPI_ISL_866114, EPI_ISL_866117, EPI_ISL_866120, EPI_ISL_866125, EPI_ISL_866126, EPI_ISL_866134, EPI_ISL_866142, EPI_ISL_866143, EPI_ISL_866146, EPI_ISL_866152, EPI_ISL_866154, EPI_ISL_866160, EPI_ISL_866171, EPI_ISL_866174, EPI_ISL_866178, EPI_ISL_866186                                                                                                                                                                                                                                                                                                                                                                                                                                                                                                                                                                                                                                                                                                                                                                                                                                                                                                                                                                                                                                                                                                                                                                                                                                                                                                                                                                                                                                                                                                                                                                                                                                                                                                                                                                                                                                                                                                                                                                                                                                                                                                                                                                                                                                                                                                                                                                                                                                                                                                                                                                                                                                                                                                                                                                                                                                                                                                                                                                                                                                                                                                                                                                                                                                                                                                                                                                                                                                                                                                                                                                                                                                                                                                                                                                                                                                                                                                                                                                                                                                                                                                                                                                                                                                                                                                                                                                                                                                                                                                                                                                                                                                                                                                                                                                                                                                                                                                                                                                                                                                                                                                                                                                                                                                                                                                                                                                                                                                                                                                                                                                                                                                                                                                                                                                                                                                                                                                                                                                                                                                                                                                                                                                                                                                                                                                                                                                                                                                                                                                                                                                                                                                                                                                                                                                                                                                                                                                                                                                                                                                                                                                                                                                                                                                                                                                                                                                                                |                                                                                                                                  |                                          |                                                                                                                                                                                                                                                                                                                                                                                                                                                                                                                                                                                                                                                                                           |
| see above                                                                                                                                                                                                                                                                                                                                                                                                                                                                                                                                                                                                                                                                                                                                                                                                                                                                                                                                                                                                                                                                                                                                                                                                                                                                                                                                                                                                                                                                                                                                                                                                                                                                                                                                                                                                                                                                                                                                                                                                                                                                                                                                                                                                                                                                                                                                                                                                                                                                                                                                                                                                                                                                                                                                                                                                                                                                                                                                                                                                                                                                                                                                                                                                                                                                                                                                                                                                                                                                                                                                                                                                                                                                                                                                                                                                                                                                                                                                                                                                                                                                                                                                                                                                                                                                                                                                                                                                                                                                                                                                                                                                                                                                                                                                                                                                                                                                                                                                                                                                                                                                                                                                                                                                                                                                                                                                                                                                                                                                                                                                                                                                                                                                                                                                                                                                                                                                                                                                                                                                                                                                                                                                                                                                                                                                                                                                                                                                                                                                                                                                                                                                                                                                                                                                                                                                                                                                                                                                                                                                                                                                                                                                                                                                                                                                                                                                                                                                                                                                                                                                                                                                                                                                                                                                                                                                                                                                                                                                                                                                                                                                                     | University College London Hospital                                                                                               | COVID-19 Genomics UK (COG-UK) Consortium | Judith Heaney, Matthew Byott, Catherine Houlihan, Dan Frampton, Stuart Kirk, Moira Spyer and Eleni Nastouli                                                                                                                                                                                                                                                                                                                                                                                                                                                                                                                                                                               |
| EPI_ISL_866194, EPI_ISL_866195, EPI_ISL_866196, EPI_ISL_866197, EPI_ISL_866199, EPI_ISL_866200, EPI_ISL_866202, EPI_ISL_866203, EPI_ISL_866204, EPI_ISL_866205, EPI_ISL_866206, EPI_ISL_866207, EPI_ISL_866208, EPI_ISL_866209, EPI_ISL_866210, EPI_ISL_866211, EPI_ISL_866212, EPI_ISL_866213, EPI_ISL_866214, EPI_ISL_866216, EPI_ISL_866218, EPI_ISL_866220, EPI_ISL_866222, EPI_ISL_866223, EPI_ISL_866224, EPI_ISL_866225, EPI_ISL_866226, EPI_ISL_866227, EPI_ISL_866228, EPI_ISL_866229, EPI_ISL_866230, EPI_ISL_866232, EPI_ISL_866233, EPI_ISL_866234, EPI_ISL_866235, EPI_ISL_866236, EPI_ISL_866237, EPI_ISL_866238, EPI_ISL_866239, EPI_ISL_866240, EPI_ISL_866241, EPI_ISL_866242, EPI_ISL_866243, EPI_ISL_866244, EPI_ISL_866245, EPI_ISL_866246, EPI_ISL_866247, EPI_ISL_866248, EPI_ISL_866249, EPI_ISL_866250, EPI_ISL_866251, EPI_ISL_866252, EPI_ISL_866253, EPI_ISL_866254, EPI_ISL_866255, EPI_ISL_866256, EPI_ISL_866257, EPI_ISL_866258, EPI_ISL_866259, EPI_ISL_866260, EPI_ISL_866261                                                                                                                                                                                                                                                                                                                                                                                                                                                                                                                                                                                                                                                                                                                                                                                                                                                                                                                                                                                                                                                                                                                                                                                                                                                                                                                                                                                                                                                                                                                                                                                                                                                                                                                                                                                                                                                                                                                                                                                                                                                                                                                                                                                                                                                                                                                                                                                                                                                                                                                                                                                                                                                                                                                                                                                                                                                                                                                                                                                                                                                                                                                                                                                                                                                                                                                                                                                                                                                                                                                                                                                                                                                                                                                                                                                                                                                                                                                                                                                                                                                                                                                                                                                                                                                                                                                                                                                                                                                                                                                                                                                                                                                                                                                                                                                                                                                                                                                                                                                                                                                                                                                                                                                                                                                                                                                                                                                                                                                                                                                                                                                                                                                                                                                                                                                                                                                                                                                                                                                                                                                                                                                                                                                                                                                                                                                                                                                                                                                                                                                                                                                                                                                                                                                                                                                                                                                                                                                                                                                                                                                                                |                                                                                                                                  |                                          |                                                                                                                                                                                                                                                                                                                                                                                                                                                                                                                                                                                                                                                                                           |
| see above                                                                                                                                                                                                                                                                                                                                                                                                                                                                                                                                                                                                                                                                                                                                                                                                                                                                                                                                                                                                                                                                                                                                                                                                                                                                                                                                                                                                                                                                                                                                                                                                                                                                                                                                                                                                                                                                                                                                                                                                                                                                                                                                                                                                                                                                                                                                                                                                                                                                                                                                                                                                                                                                                                                                                                                                                                                                                                                                                                                                                                                                                                                                                                                                                                                                                                                                                                                                                                                                                                                                                                                                                                                                                                                                                                                                                                                                                                                                                                                                                                                                                                                                                                                                                                                                                                                                                                                                                                                                                                                                                                                                                                                                                                                                                                                                                                                                                                                                                                                                                                                                                                                                                                                                                                                                                                                                                                                                                                                                                                                                                                                                                                                                                                                                                                                                                                                                                                                                                                                                                                                                                                                                                                                                                                                                                                                                                                                                                                                                                                                                                                                                                                                                                                                                                                                                                                                                                                                                                                                                                                                                                                                                                                                                                                                                                                                                                                                                                                                                                                                                                                                                                                                                                                                                                                                                                                                                                                                                                                                                                                                                                     | University College London, Great Ormond Street Hospital for Children NHS Foundation Trust, Imperial College Healthcare NHS Trust | COVID-19 Genomics UK (COG-UK) Consortium | Sergi Castellano, Rachel Williams, Mark Kristiansen, Paola Resende Silva, Sunando Roy, Tony Brooks, Helena Tutill, Paola Niola, Patricia Dyal, Charlotte Williams, Leysa Forrest, Yasmin Panchbhaya, Jacqueline Findlay, Samuel Weeks, Julianne Brown, Kathryn Harris, Paul Randell, James Price, Alison Holmes, Judith Breuer                                                                                                                                                                                                                                                                                                                                                            |
| EPI_ISL_866366, EPI_ISL_866393, EPI_ISL_866394                                                                                                                                                                                                                                                                                                                                                                                                                                                                                                                                                                                                                                                                                                                                                                                                                                                                                                                                                                                                                                                                                                                                                                                                                                                                                                                                                                                                                                                                                                                                                                                                                                                                                                                                                                                                                                                                                                                                                                                                                                                                                                                                                                                                                                                                                                                                                                                                                                                                                                                                                                                                                                                                                                                                                                                                                                                                                                                                                                                                                                                                                                                                                                                                                                                                                                                                                                                                                                                                                                                                                                                                                                                                                                                                                                                                                                                                                                                                                                                                                                                                                                                                                                                                                                                                                                                                                                                                                                                                                                                                                                                                                                                                                                                                                                                                                                                                                                                                                                                                                                                                                                                                                                                                                                                                                                                                                                                                                                                                                                                                                                                                                                                                                                                                                                                                                                                                                                                                                                                                                                                                                                                                                                                                                                                                                                                                                                                                                                                                                                                                                                                                                                                                                                                                                                                                                                                                                                                                                                                                                                                                                                                                                                                                                                                                                                                                                                                                                                                                                                                                                                                                                                                                                                                                                                                                                                                                                                                                                                                                                                                | Regional Virus Laboratory, Belfast Health and Social Care Trust                                                                  | COVID-19 Genomics UK (COG-UK) Consortium | Conall McCaughey, James McKenna, Tanya Curran, Susan Feeney, Alison Watt, Ciara Cox, Mairead Connor, Zoltan Molnar, David Simpson, Derek Fairley                                                                                                                                                                                                                                                                                                                                                                                                                                                                                                                                          |
| EPI_ISL_866542, EPI_ISL_866543, EPI_ISL_866544, EPI_ISL_866545, EPI_ISL_866546, EPI_ISL_866547, EPI_ISL_866549, EPI_ISL_866550, EPI_ISL_866551, EPI_ISL_866552, EPI_ISL_866553, EPI_ISL_866554, EPI_ISL_866555, EPI_ISL_866557, EPI_ISL_866558, EPI_ISL_866559, EPI_ISL_866561, EPI_ISL_866562, EPI_ISL_866563, EPI_ISL_866564, EPI_ISL_866565, EPI_ISL_866567, EPI_ISL_866568, EPI_ISL_866570, EPI_ISL_866571, EPI_ISL_866572, EPI_ISL_866573, EPI_ISL_866574, EPI_ISL_866575, EPI_ISL_866576, EPI_ISL_866577, EPI_ISL_866578, EPI_ISL_866579, EPI_ISL_866580, EPI_ISL_866581, EPI_ISL_866582, EPI_ISL_866583, EPI_ISL_866584, EPI_ISL_866585, EPI_ISL_866586, EPI_ISL_866587, EPI_ISL_866588, EPI_ISL_866589, EPI_ISL_866590, EPI_ISL_866591, EPI_ISL_866592, EPI_ISL_866593, EPI_ISL_866594, EPI_ISL_866595, EPI_ISL_866596, EPI_ISL_866597, EPI_ISL_866598, EPI_ISL_866599, EPI_ISL_866600, EPI_ISL_866601, EPI_ISL_866602, EPI_ISL_866603, EPI_ISL_866604, EPI_ISL_866605, EPI_ISL_866606, EPI_ISL_866607, EPI_ISL_866608, EPI_ISL_866609, EPI_ISL_866610, EPI_ISL_866611, EPI_ISL_866612, EPI_ISL_866613, EPI_ISL_866614, EPI_ISL_866615, EPI_ISL_866616, EPI_ISL_866617, EPI_ISL_866618, EPI_ISL_866619, EPI_ISL_866620, EPI_ISL_866621, EPI_ISL_866622, EPI_ISL_866623, EPI_ISL_866624, EPI_ISL_866625, EPI_ISL_866626, EPI_ISL_866627, EPI_ISL_866628, EPI_ISL_866629, EPI_ISL_866630, EPI_ISL_866631, EPI_ISL_866632, EPI_ISL_866633, EPI_ISL_866634, EPI_ISL_866635, EPI_ISL_866636, EPI_ISL_866637, EPI_ISL_866638, EPI_ISL_866639, EPI_ISL_866640, EPI_ISL_866641, EPI_ISL_866642, EPI_ISL_866643, EPI_ISL_866644, EPI_ISL_866645, EPI_ISL_866646, EPI_ISL_866647, EPI_ISL_866648, EPI_ISL_866649, EPI_ISL_866650, EPI_ISL_866651, EPI_ISL_866652, EPI_ISL_866653, EPI_ISL_866654, EPI_ISL_866655, EPI_ISL_866656, EPI_ISL_866657, EPI_ISL_866658, EPI_ISL_866659, EPI_ISL_866660, EPI_ISL_866661, EPI_ISL_866662, EPI_ISL_866663, EPI_ISL_866664, EPI_ISL_866665, EPI_ISL_866666, EPI_ISL_866667, EPI_ISL_866668, EPI_ISL_866669, EPI_ISL_866670, EPI_ISL_866671, EPI_ISL_866672, EPI_ISL_866673, EPI_ISL_866674, EPI_ISL_866675, EPI_ISL_866676, EPI_ISL_866677, EPI_ISL_866678, EPI_ISL_866679, EPI_ISL_866680, EPI_ISL_866681, EPI_ISL_866682, EPI_ISL_866683, EPI_ISL_866684, EPI_ISL_866685, EPI_ISL_866686, EPI_ISL_866687, EPI_ISL_866688, EPI_ISL_866689, EPI_ISL_866690, EPI_ISL_866691, EPI_ISL_866692, EPI_ISL_866693, EPI_ISL_866694, EPI_ISL_866695, EPI_ISL_866696, EPI_ISL_866697, EPI_ISL_866698, EPI_ISL_866699, EPI_ISL_866700, EPI_ISL_866701, EPI_ISL_866702, EPI_ISL_866703, EPI_ISL_866704, EPI_ISL_866705, EPI_ISL_866706, EPI_ISL_866707, EPI_ISL_866708, EPI_ISL_866709, EPI_ISL_866710, EPI_ISL_866711, EPI_ISL_866712, EPI_ISL_866713, EPI_ISL_866714, EPI_ISL_866715, EPI_ISL_866716, EPI_ISL_866717, EPI_ISL_866718, EPI_ISL_866719, EPI_ISL_866720, EPI_ISL_866721, EPI_ISL_866722, EPI_ISL_866723, EPI_ISL_866724, EPI_ISL_866725, EPI_ISL_866726, EPI_ISL_866727, EPI_ISL_866728, EPI_ISL_866729, EPI_ISL_866730, EPI_ISL_866731, EPI_ISL_866732, EPI_ISL_866733, EPI_ISL_866734, EPI_ISL_866735, EPI_ISL_866736, EPI_ISL_866737, EPI_ISL_866738, EPI_ISL_866739, EPI_ISL_866740, EPI_ISL_866741, EPI_ISL_866742, EPI_ISL_866743, EPI_ISL_866744, EPI_ISL_866745, EPI_ISL_866746, EPI_ISL_866747, EPI_ISL_866748, EPI_ISL_866749, EPI_ISL_866750, EPI_ISL_866751, EPI_ISL_866752, EPI_ISL_866753, EPI_ISL_866754, EPI_ISL_866755, EPI_ISL_866756, EPI_ISL_866757, EPI_ISL_866758, EPI_ISL_866759, EPI_ISL_866760, EPI_ISL_866761, EPI_ISL_866762, EPI_ISL_866763, EPI_ISL_866764, EPI_ISL_866765, EPI_ISL_866766, EPI_ISL_866767, EPI_ISL_866768, EPI_ISL_866769, EPI_ISL_866770, EPI_ISL_866771, EPI_ISL_866772, EPI_ISL_866773, EPI_ISL_866774, EPI_ISL_866775, EPI_ISL_866776, EPI_ISL_866777, EPI_ISL_866778, EPI_ISL_866779, EPI_ISL_866780, EPI_ISL_866781, EPI_ISL_866782, EPI_ISL_866783, EPI_ISL_866784, EPI_ISL_866785, EPI_ISL_866786, EPI_ISL_866787, EPI_ISL_866788, EPI_ISL_866789, EPI_ISL_866790, EPI_ISL_866791, EPI_ISL_866792, EPI_ISL_866793, EPI_ISL_866794, EPI_ISL_866795, EPI_ISL_866796, EPI_ISL_866797, EPI_ISL_866798, EPI_ISL_866799, EPI_ISL_866800, EPI_ISL_866801, EPI_ISL_866802, EPI_ISL_866803, EPI_ISL_866804                                                                                                                                                                                                                                                                                                                                                                                                                                                                                                                                                                                                                                                                                                                                                                                                                                                                                                                                                                                                                                                                                                                                                                                                                                                                                                                                                                                                                                                                                                                                                                                                                                                                                                                                                                                                                                                                                                                                                                                                                                                                                                                                                                                                                                                                                                                                                                                                                                                                                                                                                                                                                                                                                                                                                                                                                                                                                                                                                                                                                                                                                                                                                                                                                                                                                                                                                                                                                                                                                                                                                                                                                                                                                                                                                                                                |                                                                                                                                  |                                          |                                                                                                                                                                                                                                                                                                                                                                                                                                                                                                                                                                                                                                                                                           |
| see above                                                                                                                                                                                                                                                                                                                                                                                                                                                                                                                                                                                                                                                                                                                                                                                                                                                                                                                                                                                                                                                                                                                                                                                                                                                                                                                                                                                                                                                                                                                                                                                                                                                                                                                                                                                                                                                                                                                                                                                                                                                                                                                                                                                                                                                                                                                                                                                                                                                                                                                                                                                                                                                                                                                                                                                                                                                                                                                                                                                                                                                                                                                                                                                                                                                                                                                                                                                                                                                                                                                                                                                                                                                                                                                                                                                                                                                                                                                                                                                                                                                                                                                                                                                                                                                                                                                                                                                                                                                                                                                                                                                                                                                                                                                                                                                                                                                                                                                                                                                                                                                                                                                                                                                                                                                                                                                                                                                                                                                                                                                                                                                                                                                                                                                                                                                                                                                                                                                                                                                                                                                                                                                                                                                                                                                                                                                                                                                                                                                                                                                                                                                                                                                                                                                                                                                                                                                                                                                                                                                                                                                                                                                                                                                                                                                                                                                                                                                                                                                                                                                                                                                                                                                                                                                                                                                                                                                                                                                                                                                                                                                                                     | Quadram Institute Bioscience                                                                                                     | COVID-19 Genomics UK (COG-UK) Consortium | Dave J. Baker, Gemma L. Kay, Alp Aydin, Thanh Le-Viet, Steven Rudder, Ana P. Tedim, Anastasia Kolyva, Maria Diaz, Leonardo de Oliveira Martins, Nabil-Fareed Alikhan, Lizzie Meadows, Rachel Stanley, Ngozi Elumogo, Muhammed Yasir, Nicholas M. Thomson, Alexander J Trotter, Charles Gilroy, Samuel Bloomfield, Claire Stuart, Andrew Bell, Reenesh Prakash, Samir Derivisevic, Alison E. Mather, John Wain, Mark Webber, Andrew J. Page, Justin O'Grady                                                                                                                                                                                                                                |
| EPI_ISL_866908, EPI_ISL_866909, EPI_ISL_866910, EPI_ISL_866911, EPI_ISL_866912, EPI_ISL_866913, EPI_ISL_866914, EPI_ISL_866915, EPI_ISL_866916, EPI_ISL_866917, EPI_ISL_866918, EPI_ISL_866919, EPI_ISL_866920                                                                                                                                                                                                                                                                                                                                                                                                                                                                                                                                                                                                                                                                                                                                                                                                                                                                                                                                                                                                                                                                                                                                                                                                                                                                                                                                                                                                                                                                                                                                                                                                                                                                                                                                                                                                                                                                                                                                                                                                                                                                                                                                                                                                                                                                                                                                                                                                                                                                                                                                                                                                                                                                                                                                                                                                                                                                                                                                                                                                                                                                                                                                                                                                                                                                                                                                                                                                                                                                                                                                                                                                                                                                                                                                                                                                                                                                                                                                                                                                                                                                                                                                                                                                                                                                                                                                                                                                                                                                                                                                                                                                                                                                                                                                                                                                                                                                                                                                                                                                                                                                                                                                                                                                                                                                                                                                                                                                                                                                                                                                                                                                                                                                                                                                                                                                                                                                                                                                                                                                                                                                                                                                                                                                                                                                                                                                                                                                                                                                                                                                                                                                                                                                                                                                                                                                                                                                                                                                                                                                                                                                                                                                                                                                                                                                                                                                                                                                                                                                                                                                                                                                                                                                                                                                                                                                                                                                                |                                                                                                                                  |                                          |                                                                                                                                                                                                                                                                                                                                                                                                                                                                                                                                                                                                                                                                                           |
| see above                                                                                                                                                                                                                                                                                                                                                                                                                                                                                                                                                                                                                                                                                                                                                                                                                                                                                                                                                                                                                                                                                                                                                                                                                                                                                                                                                                                                                                                                                                                                                                                                                                                                                                                                                                                                                                                                                                                                                                                                                                                                                                                                                                                                                                                                                                                                                                                                                                                                                                                                                                                                                                                                                                                                                                                                                                                                                                                                                                                                                                                                                                                                                                                                                                                                                                                                                                                                                                                                                                                                                                                                                                                                                                                                                                                                                                                                                                                                                                                                                                                                                                                                                                                                                                                                                                                                                                                                                                                                                                                                                                                                                                                                                                                                                                                                                                                                                                                                                                                                                                                                                                                                                                                                                                                                                                                                                                                                                                                                                                                                                                                                                                                                                                                                                                                                                                                                                                                                                                                                                                                                                                                                                                                                                                                                                                                                                                                                                                                                                                                                                                                                                                                                                                                                                                                                                                                                                                                                                                                                                                                                                                                                                                                                                                                                                                                                                                                                                                                                                                                                                                                                                                                                                                                                                                                                                                                                                                                                                                                                                                                                                     | Queens Medical Centre, Clinical Microbiology Department / DeepSeq Nottingham                                                     | COVID-19 Genomics UK (COG-UK) Consortium | Gemma Clark, Wendy Smith, Manjinder Khakh, Vicki M Fleming, Michelle M Lister, Hannah Howson-Wells, Jonathan Ball, Patrick McClure, Joseph Chappell, Theocharis Tsoleridis, Nadine Holmes, Matthew Carlisle, Christopher Moore, Fei Sang, Johnny Noble, Victoria Wright, Matthew Loose                                                                                                                                                                                                                                                                                                                                                                                                    |
| EPI_ISL_867190, EPI_ISL_867191, EPI_ISL_867192, EPI_ISL_867193, EPI_ISL_867194, EPI_ISL_867195, EPI_ISL_867196, EPI_ISL_867197, EPI_ISL_867202, EPI_ISL_867211, EPI_ISL_867212, EPI_ISL_867213, EPI_ISL_867214, EPI_ISL_867215, EPI_ISL_867219, EPI_ISL_867220, EPI_ISL_867221, EPI_ISL_867222, EPI_ISL_867223, EPI_ISL_867224, EPI_ISL_867225, EPI_ISL_867226, EPI_ISL_867227, EPI_ISL_867228, EPI_ISL_867229, EPI_ISL_867230, EPI_ISL_867231, EPI_ISL_867232, EPI_ISL_867233, EPI_ISL_867237, EPI_ISL_867238, EPI_ISL_867239, EPI_ISL_867240, EPI_ISL_867241, EPI_ISL_867242, EPI_ISL_867243, EPI_ISL_867244, EPI_ISL_867245, EPI_ISL_867246, EPI_ISL_867247, EPI_ISL_867248, EPI_ISL_867249, EPI_ISL_867250, EPI_ISL_867251, EPI_ISL_867252, EPI_ISL_867253, EPI_ISL_867254, EPI_ISL_867255, EPI_ISL_867256, EPI_ISL_867257, EPI_ISL_867258, EPI_ISL_867259, EPI_ISL_867260, EPI_ISL_867261, EPI_ISL_867262, EPI_ISL_867263, EPI_ISL_867264, EPI_ISL_867265, EPI_ISL_867266, EPI_ISL_867267, EPI_ISL_867268, EPI_ISL_867269, EPI_ISL_867270, EPI_ISL_867271, EPI_ISL_867272, EPI_ISL_867273, EPI_ISL_867274, EPI_ISL_867275, EPI_ISL_867276, EPI_ISL_867277, EPI_ISL_867278, EPI_ISL_867279, EPI_ISL_867280, EPI_ISL_867281, EPI_ISL_867282, EPI_ISL_867283, EPI_ISL_867284, EPI_ISL_867285, EPI_ISL_867286, EPI_ISL_867287, EPI_ISL_867288, EPI_ISL_867289, EPI_ISL_867290, EPI_ISL_867291, EPI_ISL_867292, EPI_ISL_867293, EPI_ISL_867294, EPI_ISL_867295, EPI_ISL_867296, EPI_ISL_867297, EPI_ISL_867298, EPI_ISL_867299, EPI_ISL_867300, EPI_ISL_867301, EPI_ISL_867302, EPI_ISL_867303, EPI_ISL_867304, EPI_ISL_867305, EPI_ISL_867306, EPI_ISL_867307, EPI_ISL_867308, EPI_ISL_867309, EPI_ISL_867310, EPI_ISL_867311, EPI_ISL_867312, EPI_ISL_867313, EPI_ISL_867314, EPI_ISL_867315, EPI_ISL_867316, EPI_ISL_867317, EPI_ISL_867318, EPI_ISL_867319, EPI_ISL_867320, EPI_ISL_867321, EPI_ISL_867322, EPI_ISL_867323, EPI_ISL_867324, EPI_ISL_867325, EPI_ISL_867326, EPI_ISL_867327, EPI_ISL_867328, EPI_ISL_867329, EPI_ISL_867330, EPI_ISL_867331, EPI_ISL_867332, EPI_ISL_867333, EPI_ISL_867334, EPI_ISL_867335, EPI_ISL_867336, EPI_ISL_867337, EPI_ISL_867338, EPI_ISL_867339, EPI_ISL_867340, EPI_ISL_867341, EPI_ISL_867342, EPI_ISL_867343, EPI_ISL_867344, EPI_ISL_867345, EPI_ISL_867346, EPI_ISL_867347, EPI_ISL_867348, EPI_ISL_867349, EPI_ISL_867350, EPI_ISL_867351, EPI_ISL_867352, EPI_ISL_867353, EPI_ISL_867354, EPI_ISL_867355, EPI_ISL_867356, EPI_ISL_867357, EPI_ISL_867358, EPI_ISL_867359, EPI_ISL_867360, EPI_ISL_867361, EPI_ISL_867362, EPI_ISL_867363, EPI_ISL_867364, EPI_ISL_867365, EPI_ISL_867366, EPI_ISL_867367, EPI_ISL_867368, EPI_ISL_867369, EPI_ISL_867370, EPI_ISL_867371, EPI_ISL_867372, EPI_ISL_867373, EPI_ISL_867374, EPI_ISL_867375, EPI_ISL_867376, EPI_ISL_867377, EPI_ISL_867378, EPI_ISL_867379, EPI_ISL_867380, EPI_ISL_867381, EPI_ISL_867382, EPI_ISL_867383, EPI_ISL_867384, EPI_ISL_867385, EPI_ISL_867386, EPI_ISL_867387, EPI_ISL_867388, EPI_ISL_867389, EPI_ISL_867390, EPI_ISL_867391, EPI_ISL_867392, EPI_ISL_867393, EPI_ISL_867394, EPI_ISL_867395, EPI_ISL_867396, EPI_ISL_867397, EPI_ISL_867398, EPI_ISL_867399, EPI_ISL_867400, EPI_ISL_867401, EPI_ISL_867403, EPI_ISL_867404, EPI_ISL_867405, EPI_ISL_867406, EPI_ISL_867407, EPI_ISL_867408, EPI_ISL_867409, EPI_ISL_867410, EPI_ISL_867411, EPI_ISL_867412, EPI_ISL_867413, EPI_ISL_867414, EPI_ISL_867415, EPI_ISL_867416, EPI_ISL_867417, EPI_ISL_867418, EPI_ISL_867419, EPI_ISL_867420, EPI_ISL_867421, EPI_ISL_867422, EPI_ISL_867423, EPI_ISL_867424, EPI_ISL_867425, EPI_ISL_867426, EPI_ISL_867427, EPI_ISL_867428, EPI_ISL_867429, EPI_ISL_867430, EPI_ISL_867431, EPI_ISL_867432, EPI_ISL_867433, EPI_ISL_867434, EPI_ISL_867435, EPI_ISL_867436, EPI_ISL_867437, EPI_ISL_867438, EPI_ISL_867439, EPI_ISL_867440, EPI_ISL_867441, EPI_ISL_867442, EPI_ISL_867443, EPI_ISL_867444, EPI_ISL_867445, EPI_ISL_867446, EPI_ISL_867447, EPI_ISL_867448, EPI_ISL_867449, EPI_ISL_867450, EPI_ISL_867451, EPI_ISL_867452, EPI_ISL_867453, EPI_ISL_867454, EPI_ISL_867455, EPI_ISL_867456, EPI_ISL_867457, EPI_ISL_867458, EPI_ISL_867459, EPI_ISL_867460, EPI_ISL_867461, EPI_ISL_867462, EPI_ISL_867463, EPI_ISL_867464, EPI_ISL_867465, EPI_ISL_867466, EPI_ISL_867467, EPI_ISL_867468, EPI_ISL_867469, EPI_ISL_867470, EPI_ISL_867471, EPI_ISL_867472, EPI_ISL_867473, EPI_ISL_867474, EPI_ISL_867475, EPI_ISL_867476, EPI_ISL_867477, EPI_ISL_867478, EPI_ISL_867479, EPI_ISL_867480, EPI_ISL_867481, EPI_ISL_867482, EPI_ISL_867483, EPI_ISL_867484, EPI_ISL_867485, EPI_ISL_867486, EPI_ISL_867487, EPI_ISL_867488, EPI_ISL_867489, EPI_ISL_867490, EPI_ISL_867491, EPI_ISL_867492, EPI_ISL_867493, EPI_ISL_867494, EPI_ISL_867495, EPI_ISL_867496, EPI_ISL_867497, EPI_ISL_867498, EPI_ISL_867499, EPI_ISL_867500, EPI_ISL_867501, EPI_ISL_867502, EPI_ISL_867503, EPI_ISL_867504, EPI_ISL_867505, EPI_ISL_867506, EPI_ISL_867507, EPI_ISL_867508, EPI_ISL_867509, EPI_ISL_867510, EPI_ISL_867511, EPI_ISL_867512, EPI_ISL_867513, EPI_ISL_867514, EPI_ISL_867515, EPI_ISL_867516, EPI_ISL_867517, EPI_ISL_867518, EPI_ISL_867519, EPI_ISL_867520, EPI_ISL_867521, EPI_ISL_867522, EPI_ISL_867523, EPI_ISL_867524, EPI_ISL_867525, EPI_ISL_867526, EPI_ISL_867527, EPI_ISL_867528, EPI_ISL_867529, EPI_ISL_867530, EPI_ISL_867531, EPI_ISL_867532, EPI_ISL_867533, EPI_ISL_867534, EPI_ISL_867535, EPI_ISL_867536, EPI_ISL_867537, EPI_ISL_867538, EPI_ISL_867539, EPI_ISL_867540, EPI_ISL_867541, EPI_ISL_867542, EPI_ISL_867543, EPI_ISL_867544, EPI_ISL_867545, EPI_ISL_867546, EPI_ISL_867547, EPI_ISL_867548, EPI_ISL_867549, EPI_ISL_867550, EPI_ISL_867551, EPI_ISL_867552, EPI_ISL_867553, EPI_ISL_867554, EPI_ISL_867555, EPI_ISL_867556, EPI_ISL_867557, EPI_ISL_867558, EPI_ISL_867559, EPI_ISL_867560, EPI_ISL_867561, EPI_ISL_867562, EPI_ISL_867563, EPI_ISL_867564, EPI_ISL_867565, EPI_ISL_867566, EPI_ISL_867567, EPI_ISL_867568, EPI_ISL_867569, EPI_ISL_867570, EPI_ISL_867571, EPI_ISL_867572, EPI_ISL_867573, EPI_ISL_867574, EPI_ISL_867575, EPI_ISL_867576, EPI_ISL_867577, EPI_ISL_867578, EPI_ISL_867579, EPI_ISL_867580, EPI_ISL_867581, EPI_ISL_867582, EPI_ISL_867583, EPI_ISL_867584, EPI_ISL_867585, EPI_ISL_867586, EPI_ISL_867587, EPI_ISL_867588, EPI_ISL_867589, EPI_ISL_867590, EPI_ISL_867591, EPI_ISL_867592, EPI_ISL_867593, EPI_ISL_867594, EPI_ISL_867595, EPI_ISL_867596, EPI_ISL_867597, EPI_ISL_867598, EPI_ISL_867599, EPI_ISL_867600, EPI_ISL_867601, EPI_ISL_867602, EPI_ISL_867603, EPI_ISL_867604, EPI_ISL_867605, EPI_ISL_867606, EPI_ISL_867607, EPI_ISL_867608, EPI_ISL_867609, EPI_ISL_867610, EPI_ISL_867611, EPI_ISL_867612, EPI_ISL_867613, EPI_ISL_867614, EPI_ISL_867615, EPI_ISL_867616, EPI_ISL_867617, EPI_ISL_867618, EPI_ISL_867619, EPI_ISL_867620, EPI_ISL_867621, EPI_ISL_867622, EPI_ISL_867623, EPI_ISL_867624, EPI_ISL_867625, EPI_ISL_867626, EPI_ISL_867627, EPI_ISL_867628, EPI_ISL_867629, EPI_ISL_867630, EPI_ISL_867631, EPI_ISL_867632, EPI_ISL_867633, EPI_ISL_867634, EPI_ISL_867635, EPI_ISL_867636, EPI_ISL_867637, EPI_ISL_867638, EPI_ISL_867639, EPI_ISL_867640, EPI_ISL_867641, EPI_ISL_867642, EPI_ISL_867643, EPI_ISL_867644, EPI_ISL_867645, EPI_ISL_867646, EPI_ISL_867647, EPI_ISL_867648, EPI_ISL_867649, EPI_ISL_867650, EPI_ISL_867651, EPI_ISL_867652, EPI_ISL_867653, EPI_ISL_867654, EPI_ISL_867655, EPI_ISL_867656, EPI_ISL_867657, EPI_ISL_867658, EPI_ISL_867659, EPI_ISL_867660, EPI_ISL_867661, EPI_ISL_867662, EPI_ISL_867663, EPI_ISL_867664, EPI_ISL_867665, EPI_ISL_867666, EPI_ISL_867667, EPI_ISL_867668, EPI_ISL_867669, EPI_ISL_867670, EPI_ISL_867671, EPI_ISL_867672, EPI_ISL_867673, EPI_ISL_867674, EPI_ISL_867675, EPI_ISL_867676, EPI_ISL_867677, EPI_ISL_867678, EPI_ISL_867679, EPI_ISL_867680, EPI_ISL_867681, EPI_ISL_867682, EPI_ISL_867683, EPI_ISL_867684, EPI_ISL_867685, EPI_ISL_867686, EPI_ISL_867687, EPI_ISL_867688, EPI_ISL_867689, EPI_ISL_867690, EPI_ISL_867691, EPI_ISL_867692, EPI_ISL_867693, EPI_ISL_86769 |                                                                                                                                  |                                          |                                                                                                                                                                                                                                                                                                                                                                                                                                                                                                                                                                                                                                                                                           |

|                                                                                                                                                                                                                                                                                                                                                                                                                                                                                                                                                                                                                                                |                                                                                                                                                                                  |                                                                            |                                                                                                                                                                                                                                                                             |
|------------------------------------------------------------------------------------------------------------------------------------------------------------------------------------------------------------------------------------------------------------------------------------------------------------------------------------------------------------------------------------------------------------------------------------------------------------------------------------------------------------------------------------------------------------------------------------------------------------------------------------------------|----------------------------------------------------------------------------------------------------------------------------------------------------------------------------------|----------------------------------------------------------------------------|-----------------------------------------------------------------------------------------------------------------------------------------------------------------------------------------------------------------------------------------------------------------------------|
| see above                                                                                                                                                                                                                                                                                                                                                                                                                                                                                                                                                                                                                                      | Virology Department, Sheffield Teaching Hospitals NHS Foundation Trust/Department of Infection, Immunity and Cardiovascular Disease, The Medical School, University of Sheffield | COVID-19 Genomics UK (COG-UK) Consortium                                   | Thushan de Silva, Matthew Parker, Nikki Smith, Adri Angyal, Rebecca Brown, Luke Green, Rachel Tucker, Paul Parsons, Danielle Groves, Katie Johnson, Laura Carllero, Alex Keeley, Dave Partridge, Matthew Wyles, Benjamin Lindsey, Mehmet Yavuz, Mohammad Raza, Cariad Evans |
| EPI_ISL_873279, EPI_ISL_873280                                                                                                                                                                                                                                                                                                                                                                                                                                                                                                                                                                                                                 | Lighthouse Lab in Milton Keynes                                                                                                                                                  | Wellcome Sanger Institute for the COVID-19 Genomics UK (COG-UK) Consortium | The Lighthouse Lab in Milton Keynes and Alex Alderton, Roberto Amato, Sonia Goncalves, Ewan Harrison, David K. Jackson, Ian Johnston, Dominic Kwiatkowski, Cordelia Langford, John Sillitoe on behalf of the Wellcome Sanger Institute COVID-19 Surveillance Team           |
| EPI_ISL_873282                                                                                                                                                                                                                                                                                                                                                                                                                                                                                                                                                                                                                                 | Lighthouse Lab in Cambridge                                                                                                                                                      | Wellcome Sanger Institute for the COVID-19 Genomics UK (COG-UK) Consortium | Rob Howes, The Lighthouse Lab in Cambridge and Alex Alderton, Roberto Amato, Sonia Goncalves, Ewan Harrison, David K. Jackson, Ian Johnston, Dominic Kwiatkowski, Cordelia Langford, John Sillitoe on behalf of the Wellcome Sanger Institute COVID-19 Surveillance Team    |
| EPI_ISL_873284, EPI_ISL_873285, EPI_ISL_873287, EPI_ISL_873288, EPI_ISL_873289, EPI_ISL_873290, EPI_ISL_873293                                                                                                                                                                                                                                                                                                                                                                                                                                                                                                                                 | Lighthouse Lab in Milton Keynes                                                                                                                                                  | Wellcome Sanger Institute for the COVID-19 Genomics UK (COG-UK) Consortium | The Lighthouse Lab in Milton Keynes and Alex Alderton, Roberto Amato, Sonia Goncalves, Ewan Harrison, David K. Jackson, Ian Johnston, Dominic Kwiatkowski, Cordelia Langford, John Sillitoe on behalf of the Wellcome Sanger Institute COVID-19 Surveillance Team           |
| EPI_ISL_873295                                                                                                                                                                                                                                                                                                                                                                                                                                                                                                                                                                                                                                 | Lighthouse Lab in Cambridge                                                                                                                                                      | Wellcome Sanger Institute for the COVID-19 Genomics UK (COG-UK) Consortium | Rob Howes, The Lighthouse Lab in Cambridge and Alex Alderton, Roberto Amato, Sonia Goncalves, Ewan Harrison, David K. Jackson, Ian Johnston, Dominic Kwiatkowski, Cordelia Langford, John Sillitoe on behalf of the Wellcome Sanger Institute COVID-19 Surveillance Team    |
| EPI_ISL_873296, EPI_ISL_873299, EPI_ISL_873300, EPI_ISL_873301, EPI_ISL_873303, EPI_ISL_873305, EPI_ISL_873307, EPI_ISL_873308, EPI_ISL_873309, EPI_ISL_873312, EPI_ISL_873314, EPI_ISL_873315, EPI_ISL_873317, EPI_ISL_873319, EPI_ISL_873322, EPI_ISL_873323, EPI_ISL_873327, EPI_ISL_873328, EPI_ISL_873329, EPI_ISL_873331, EPI_ISL_873332, EPI_ISL_873333, EPI_ISL_873335, EPI_ISL_873338, EPI_ISL_873340, EPI_ISL_873344, EPI_ISL_873345, EPI_ISL_873346, EPI_ISL_873349, EPI_ISL_873351, EPI_ISL_873352, EPI_ISL_873353, EPI_ISL_873355, EPI_ISL_873356, EPI_ISL_873358, EPI_ISL_873360, EPI_ISL_873363                                 |                                                                                                                                                                                  |                                                                            |                                                                                                                                                                                                                                                                             |
| see above                                                                                                                                                                                                                                                                                                                                                                                                                                                                                                                                                                                                                                      | Lighthouse Lab in Milton Keynes                                                                                                                                                  | Wellcome Sanger Institute for the COVID-19 Genomics UK (COG-UK) Consortium | The Lighthouse Lab in Milton Keynes and Alex Alderton, Roberto Amato, Sonia Goncalves, Ewan Harrison, David K. Jackson, Ian Johnston, Dominic Kwiatkowski, Cordelia Langford, John Sillitoe on behalf of the Wellcome Sanger Institute COVID-19 Surveillance Team           |
| EPI_ISL_873365                                                                                                                                                                                                                                                                                                                                                                                                                                                                                                                                                                                                                                 | Lighthouse Lab in Cambridge                                                                                                                                                      | Wellcome Sanger Institute for the COVID-19 Genomics UK (COG-UK) Consortium | Rob Howes, The Lighthouse Lab in Cambridge and Alex Alderton, Roberto Amato, Sonia Goncalves, Ewan Harrison, David K. Jackson, Ian Johnston, Dominic Kwiatkowski, Cordelia Langford, John Sillitoe on behalf of the Wellcome Sanger Institute COVID-19 Surveillance Team    |
| EPI_ISL_873366, EPI_ISL_873367                                                                                                                                                                                                                                                                                                                                                                                                                                                                                                                                                                                                                 | Lighthouse Lab in Milton Keynes                                                                                                                                                  | Wellcome Sanger Institute for the COVID-19 Genomics UK (COG-UK) Consortium | The Lighthouse Lab in Milton Keynes and Alex Alderton, Roberto Amato, Sonia Goncalves, Ewan Harrison, David K. Jackson, Ian Johnston, Dominic Kwiatkowski, Cordelia Langford, John Sillitoe on behalf of the Wellcome Sanger Institute COVID-19 Surveillance Team           |
| EPI_ISL_873368                                                                                                                                                                                                                                                                                                                                                                                                                                                                                                                                                                                                                                 | Lighthouse Lab in Cambridge                                                                                                                                                      | Wellcome Sanger Institute for the COVID-19 Genomics UK (COG-UK) Consortium | Rob Howes, The Lighthouse Lab in Cambridge and Alex Alderton, Roberto Amato, Sonia Goncalves, Ewan Harrison, David K. Jackson, Ian Johnston, Dominic Kwiatkowski, Cordelia Langford, John Sillitoe on behalf of the Wellcome Sanger Institute COVID-19 Surveillance Team    |
| EPI_ISL_873372, EPI_ISL_873373, EPI_ISL_873375, EPI_ISL_873377, EPI_ISL_873379, EPI_ISL_873380, EPI_ISL_873382, EPI_ISL_873383, EPI_ISL_873384, EPI_ISL_873385, EPI_ISL_873387, EPI_ISL_873390, EPI_ISL_873391, EPI_ISL_873392, EPI_ISL_873393, EPI_ISL_873394, EPI_ISL_873395, EPI_ISL_873397, EPI_ISL_873398, EPI_ISL_873400, EPI_ISL_873401, EPI_ISL_873402, EPI_ISL_873403, EPI_ISL_873404, EPI_ISL_873405, EPI_ISL_873406, EPI_ISL_873407, EPI_ISL_873408, EPI_ISL_873409, EPI_ISL_873410, EPI_ISL_873417                                                                                                                                 |                                                                                                                                                                                  |                                                                            |                                                                                                                                                                                                                                                                             |
| see above                                                                                                                                                                                                                                                                                                                                                                                                                                                                                                                                                                                                                                      | Lighthouse Lab in Milton Keynes                                                                                                                                                  | Wellcome Sanger Institute for the COVID-19 Genomics UK (COG-UK) Consortium | The Lighthouse Lab in Milton Keynes and Alex Alderton, Roberto Amato, Sonia Goncalves, Ewan Harrison, David K. Jackson, Ian Johnston, Dominic Kwiatkowski, Cordelia Langford, John Sillitoe on behalf of the Wellcome Sanger Institute COVID-19 Surveillance Team           |
| EPI_ISL_873418                                                                                                                                                                                                                                                                                                                                                                                                                                                                                                                                                                                                                                 | Lighthouse Lab in Cambridge                                                                                                                                                      | Wellcome Sanger Institute for the COVID-19 Genomics UK (COG-UK) Consortium | Rob Howes, The Lighthouse Lab in Cambridge and Alex Alderton, Roberto Amato, Sonia Goncalves, Ewan Harrison, David K. Jackson, Ian Johnston, Dominic Kwiatkowski, Cordelia Langford, John Sillitoe on behalf of the Wellcome Sanger Institute COVID-19 Surveillance Team    |
| EPI_ISL_873419, EPI_ISL_873421, EPI_ISL_873423, EPI_ISL_873424, EPI_ISL_873425, EPI_ISL_873427                                                                                                                                                                                                                                                                                                                                                                                                                                                                                                                                                 | Lighthouse Lab in Milton Keynes                                                                                                                                                  | Wellcome Sanger Institute for the COVID-19 Genomics UK (COG-UK) Consortium | The Lighthouse Lab in Milton Keynes and Alex Alderton, Roberto Amato, Sonia Goncalves, Ewan Harrison, David K. Jackson, Ian Johnston, Dominic Kwiatkowski, Cordelia Langford, John Sillitoe on behalf of the Wellcome Sanger Institute COVID-19 Surveillance Team           |
| EPI_ISL_873432                                                                                                                                                                                                                                                                                                                                                                                                                                                                                                                                                                                                                                 | Lighthouse Lab in Cambridge                                                                                                                                                      | Wellcome Sanger Institute for the COVID-19 Genomics UK (COG-UK) Consortium | Rob Howes, The Lighthouse Lab in Cambridge and Alex Alderton, Roberto Amato, Sonia Goncalves, Ewan Harrison, David K. Jackson, Ian Johnston, Dominic Kwiatkowski, Cordelia Langford, John Sillitoe on behalf of the Wellcome Sanger Institute COVID-19 Surveillance Team    |
| EPI_ISL_873434, EPI_ISL_873436, EPI_ISL_873437, EPI_ISL_873440, EPI_ISL_873441, EPI_ISL_873442, EPI_ISL_873446, EPI_ISL_873447, EPI_ISL_873448, EPI_ISL_873449, EPI_ISL_873452, EPI_ISL_873453, EPI_ISL_873456, EPI_ISL_873458, EPI_ISL_873459, EPI_ISL_873460, EPI_ISL_873461, EPI_ISL_873463, EPI_ISL_873464, EPI_ISL_873465, EPI_ISL_873467, EPI_ISL_873468, EPI_ISL_873469, EPI_ISL_873470, EPI_ISL_873471, EPI_ISL_873472, EPI_ISL_873474, EPI_ISL_873475, EPI_ISL_873477, EPI_ISL_873478, EPI_ISL_873479, EPI_ISL_873480, EPI_ISL_873483, EPI_ISL_873484, EPI_ISL_873485, EPI_ISL_873486, EPI_ISL_873488                                 |                                                                                                                                                                                  |                                                                            |                                                                                                                                                                                                                                                                             |
| see above                                                                                                                                                                                                                                                                                                                                                                                                                                                                                                                                                                                                                                      | Lighthouse Lab in Milton Keynes                                                                                                                                                  | Wellcome Sanger Institute for the COVID-19 Genomics UK (COG-UK) Consortium | The Lighthouse Lab in Milton Keynes and Alex Alderton, Roberto Amato, Sonia Goncalves, Ewan Harrison, David K. Jackson, Ian Johnston, Dominic Kwiatkowski, Cordelia Langford, John Sillitoe on behalf of the Wellcome Sanger Institute COVID-19 Surveillance Team           |
| EPI_ISL_873489                                                                                                                                                                                                                                                                                                                                                                                                                                                                                                                                                                                                                                 | Lighthouse Lab in Cambridge                                                                                                                                                      | Wellcome Sanger Institute for the COVID-19 Genomics UK (COG-UK) Consortium | Rob Howes, The Lighthouse Lab in Cambridge and Alex Alderton, Roberto Amato, Sonia Goncalves, Ewan Harrison, David K. Jackson, Ian Johnston, Dominic Kwiatkowski, Cordelia Langford, John Sillitoe on behalf of the Wellcome Sanger Institute COVID-19 Surveillance Team    |
| EPI_ISL_873490, EPI_ISL_873491, EPI_ISL_873498, EPI_ISL_873502, EPI_ISL_873505, EPI_ISL_873506, EPI_ISL_873507, EPI_ISL_873508, EPI_ISL_873511, EPI_ISL_873512                                                                                                                                                                                                                                                                                                                                                                                                                                                                                 | Lighthouse Lab in Milton Keynes                                                                                                                                                  | Wellcome Sanger Institute for the COVID-19 Genomics UK (COG-UK) Consortium | The Lighthouse Lab in Milton Keynes and Alex Alderton, Roberto Amato, Sonia Goncalves, Ewan Harrison, David K. Jackson, Ian Johnston, Dominic Kwiatkowski, Cordelia Langford, John Sillitoe on behalf of the Wellcome Sanger Institute COVID-19 Surveillance Team           |
| EPI_ISL_873513                                                                                                                                                                                                                                                                                                                                                                                                                                                                                                                                                                                                                                 | Lighthouse Lab in Cambridge                                                                                                                                                      | Wellcome Sanger Institute for the COVID-19 Genomics UK (COG-UK) Consortium | Rob Howes, The Lighthouse Lab in Cambridge and Alex Alderton, Roberto Amato, Sonia Goncalves, Ewan Harrison, David K. Jackson, Ian Johnston, Dominic Kwiatkowski, Cordelia Langford, John Sillitoe on behalf of the Wellcome Sanger Institute COVID-19 Surveillance Team    |
| EPI_ISL_873514, EPI_ISL_873516, EPI_ISL_873517, EPI_ISL_873519, EPI_ISL_873521, EPI_ISL_873522, EPI_ISL_873523, EPI_ISL_873524, EPI_ISL_873525, EPI_ISL_873526, EPI_ISL_873527, EPI_ISL_873528, EPI_ISL_873529, EPI_ISL_873530, EPI_ISL_873533, EPI_ISL_873534, EPI_ISL_873535, EPI_ISL_873536, EPI_ISL_873538, EPI_ISL_873539, EPI_ISL_873540, EPI_ISL_873541, EPI_ISL_873542, EPI_ISL_873543, EPI_ISL_873544, EPI_ISL_873545, EPI_ISL_873546, EPI_ISL_873547, EPI_ISL_873548, EPI_ISL_873549, EPI_ISL_873550, EPI_ISL_873553, EPI_ISL_873554, EPI_ISL_873555, EPI_ISL_873556, EPI_ISL_873557, EPI_ISL_873558, EPI_ISL_873559, EPI_ISL_873560 |                                                                                                                                                                                  |                                                                            |                                                                                                                                                                                                                                                                             |
| see above                                                                                                                                                                                                                                                                                                                                                                                                                                                                                                                                                                                                                                      | Lighthouse Lab in Milton Keynes                                                                                                                                                  | Wellcome Sanger Institute for the COVID-19 Genomics UK (COG-UK) Consortium | The Lighthouse Lab in Milton Keynes and Alex Alderton, Roberto Amato, Sonia Goncalves, Ewan Harrison, David K. Jackson, Ian Johnston, Dominic Kwiatkowski, Cordelia Langford, John Sillitoe on behalf of the Wellcome Sanger Institute COVID-19 Surveillance Team           |
| EPI_ISL_873561                                                                                                                                                                                                                                                                                                                                                                                                                                                                                                                                                                                                                                 | Lighthouse Lab in Cambridge                                                                                                                                                      | Wellcome Sanger Institute for the COVID-19 Genomics UK (COG-UK) Consortium | Rob Howes, The Lighthouse Lab in Cambridge and Alex Alderton, Roberto Amato, Sonia Goncalves, Ewan Harrison, David K. Jackson, Ian Johnston, Dominic Kwiatkowski, Cordelia Langford, John Sillitoe on behalf of the Wellcome Sanger Institute COVID-19 Surveillance Team    |
| EPI_ISL_873562, EPI_ISL_873563, EPI_ISL_873564, EPI_ISL_873565, EPI_ISL_873567, EPI_ISL_873568, EPI_ISL_873569, EPI_ISL_873570, EPI_ISL_873572, EPI_ISL_873575, EPI_ISL_873577, EPI_ISL_873578, EPI_ISL_873579, EPI_ISL_873580, EPI_ISL_873581, EPI_ISL_873582, EPI_ISL_873583, EPI_ISL_873584, EPI_ISL_873586, EPI_ISL_873587, EPI_ISL_873588, EPI_ISL_873589, EPI_ISL_873590, EPI_ISL_873591, EPI_ISL_873592, EPI_ISL_873593, EPI_ISL_873594, EPI_ISL_873595, EPI_ISL_873597, EPI_ISL_873598, EPI_ISL_873599, EPI_ISL_873601, EPI_ISL_873602, EPI_ISL_873606, EPI_ISL_873608, EPI_ISL_873609, EPI_ISL_873610                                 |                                                                                                                                                                                  |                                                                            |                                                                                                                                                                                                                                                                             |
| see above                                                                                                                                                                                                                                                                                                                                                                                                                                                                                                                                                                                                                                      | Lighthouse Lab in Milton Keynes                                                                                                                                                  | Wellcome Sanger Institute for the COVID-19 Genomics UK (COG-UK) Consortium | The Lighthouse Lab in Milton Keynes and Alex Alderton, Roberto Amato, Sonia Goncalves, Ewan Harrison, David K. Jackson, Ian Johnston, Dominic Kwiatkowski, Cordelia Langford, John Sillitoe on behalf of the Wellcome Sanger Institute COVID-19 Surveillance Team           |
| EPI_ISL_873611                                                                                                                                                                                                                                                                                                                                                                                                                                                                                                                                                                                                                                 | Lighthouse Lab in Cambridge                                                                                                                                                      | Wellcome Sanger Institute for the COVID-19 Genomics UK (COG-UK) Consortium | Rob Howes, The Lighthouse Lab in Cambridge and Alex Alderton, Roberto Amato, Sonia Goncalves, Ewan Harrison, David K. Jackson, Ian Johnston, Dominic Kwiatkowski, Cordelia Langford, John Sillitoe on behalf of the Wellcome Sanger Institute COVID-19 Surveillance Team    |
| EPI_ISL_873612                                                                                                                                                                                                                                                                                                                                                                                                                                                                                                                                                                                                                                 | Lighthouse Lab in Milton Keynes                                                                                                                                                  | Wellcome Sanger Institute for the COVID-19 Genomics UK (COG-UK) Consortium | The Lighthouse Lab in Milton Keynes and Alex Alderton, Roberto Amato, Sonia Goncalves, Ewan Harrison, David K. Jackson, Ian Johnston, Dominic Kwiatkowski, Cordelia Langford, John Sillitoe on behalf of the Wellcome Sanger Institute COVID-19 Surveillance Team           |
| EPI_ISL_873613                                                                                                                                                                                                                                                                                                                                                                                                                                                                                                                                                                                                                                 | Lighthouse Lab in Cambridge                                                                                                                                                      | Wellcome Sanger Institute for the COVID-19 Genomics UK (COG-UK) Consortium | Rob Howes, The Lighthouse Lab in Cambridge and Alex Alderton, Roberto Amato, Sonia Goncalves, Ewan Harrison, David K. Jackson, Ian Johnston, Dominic Kwiatkowski, Cordelia Langford, John Sillitoe on behalf of the Wellcome Sanger Institute COVID-19 Surveillance Team    |
| EPI_ISL_873615, EPI_ISL_873616, EPI_ISL_873617, EPI_ISL_873618, EPI_ISL_873619, EPI_ISL_873620, EPI_ISL_873622, EPI_ISL_873623                                                                                                                                                                                                                                                                                                                                                                                                                                                                                                                 | Lighthouse Lab in Milton Keynes                                                                                                                                                  | Wellcome Sanger Institute for the COVID-19 Genomics UK (COG-UK) Consortium | The Lighthouse Lab in Milton Keynes and Alex Alderton, Roberto Amato, Sonia Goncalves, Ewan Harrison, David K. Jackson, Ian Johnston, Dominic Kwiatkowski, Cordelia Langford, John Sillitoe on behalf of the Wellcome Sanger Institute COVID-19 Surveillance Team           |
| EPI_ISL_873624                                                                                                                                                                                                                                                                                                                                                                                                                                                                                                                                                                                                                                 | Lighthouse Lab in Cambridge                                                                                                                                                      | Wellcome Sanger Institute for the COVID-19 Genomics UK (COG-UK) Consortium | Rob Howes, The Lighthouse Lab in Cambridge and Alex Alderton, Roberto Amato, Sonia Goncalves, Ewan Harrison, David K. Jackson, Ian Johnston, Dominic Kwiatkowski, Cordelia Langford, John Sillitoe on behalf of the Wellcome Sanger Institute COVID-19 Surveillance Team    |



|                                                                                                                                                                                                                                                                                                                                                                                                                                                                                                                                                                                                                                                                                                                                                                                                                                                                                                                                                                                                                                                                                                                                                                                                                                                                                                                                                                                                                                                                                                                                                                                                                                                                                                                                                                                                                                                                                                                                                                                                                                                                                                                                                                                                                                                                                                                                                                                                                                                                                                                                                                                                                                                                                                                                                                                                                                                                                                                                                                                                                                                                                                                                                                                                                                                                                                                                                                                                                                                                                                                                                                                                                                                                                                                                                                                                                                                                                                                                                                                                                                                                                                                                                                                                                                                                                                                                                                                                                                                                                |           |                                 |                                                                            |                                                                                                                                                                                                                                                                                                   |
|--------------------------------------------------------------------------------------------------------------------------------------------------------------------------------------------------------------------------------------------------------------------------------------------------------------------------------------------------------------------------------------------------------------------------------------------------------------------------------------------------------------------------------------------------------------------------------------------------------------------------------------------------------------------------------------------------------------------------------------------------------------------------------------------------------------------------------------------------------------------------------------------------------------------------------------------------------------------------------------------------------------------------------------------------------------------------------------------------------------------------------------------------------------------------------------------------------------------------------------------------------------------------------------------------------------------------------------------------------------------------------------------------------------------------------------------------------------------------------------------------------------------------------------------------------------------------------------------------------------------------------------------------------------------------------------------------------------------------------------------------------------------------------------------------------------------------------------------------------------------------------------------------------------------------------------------------------------------------------------------------------------------------------------------------------------------------------------------------------------------------------------------------------------------------------------------------------------------------------------------------------------------------------------------------------------------------------------------------------------------------------------------------------------------------------------------------------------------------------------------------------------------------------------------------------------------------------------------------------------------------------------------------------------------------------------------------------------------------------------------------------------------------------------------------------------------------------------------------------------------------------------------------------------------------------------------------------------------------------------------------------------------------------------------------------------------------------------------------------------------------------------------------------------------------------------------------------------------------------------------------------------------------------------------------------------------------------------------------------------------------------------------------------------------------------------------------------------------------------------------------------------------------------------------------------------------------------------------------------------------------------------------------------------------------------------------------------------------------------------------------------------------------------------------------------------------------------------------------------------------------------------------------------------------------------------------------------------------------------------------------------------------------------------------------------------------------------------------------------------------------------------------------------------------------------------------------------------------------------------------------------------------------------------------------------------------------------------------------------------------------------------------------------------------------------------------------------------------------------|-----------|---------------------------------|----------------------------------------------------------------------------|---------------------------------------------------------------------------------------------------------------------------------------------------------------------------------------------------------------------------------------------------------------------------------------------------|
| EPI_ISL_880667, EPI_ISL_880668, EPI_ISL_880669, EPI_ISL_880670, EPI_ISL_880671, EPI_ISL_880672, EPI_ISL_880673, EPI_ISL_880674, EPI_ISL_880675, EPI_ISL_880676, EPI_ISL_880677, EPI_ISL_880678, EPI_ISL_880679, EPI_ISL_880680, EPI_ISL_880681, EPI_ISL_880682, EPI_ISL_880683, EPI_ISL_880684, EPI_ISL_880685, EPI_ISL_880686, EPI_ISL_880687, EPI_ISL_880688, EPI_ISL_880689, EPI_ISL_880690, EPI_ISL_880691, EPI_ISL_880692, EPI_ISL_880693, EPI_ISL_880694, EPI_ISL_880695, EPI_ISL_880696, EPI_ISL_880697, EPI_ISL_880698, EPI_ISL_880699, EPI_ISL_880700, EPI_ISL_880701, EPI_ISL_880702, EPI_ISL_880703, EPI_ISL_880704, EPI_ISL_880705, EPI_ISL_880706, EPI_ISL_880707, EPI_ISL_880708, EPI_ISL_880709, EPI_ISL_880710, EPI_ISL_880711, EPI_ISL_880712, EPI_ISL_880713, EPI_ISL_880714, EPI_ISL_880715, EPI_ISL_880716, EPI_ISL_880717, EPI_ISL_880718, EPI_ISL_880719, EPI_ISL_880720, EPI_ISL_880721, EPI_ISL_880722, EPI_ISL_880723, EPI_ISL_880724, EPI_ISL_880725, EPI_ISL_880726, EPI_ISL_880727, EPI_ISL_880728, EPI_ISL_880729, EPI_ISL_880730, EPI_ISL_880731, EPI_ISL_880732, EPI_ISL_880733, EPI_ISL_880734, EPI_ISL_880735, EPI_ISL_880736, EPI_ISL_880737, EPI_ISL_880738, EPI_ISL_880739, EPI_ISL_880740, EPI_ISL_880741, EPI_ISL_880742, EPI_ISL_880743, EPI_ISL_880744, EPI_ISL_880745, EPI_ISL_880746, EPI_ISL_880747, EPI_ISL_880748, EPI_ISL_880749, EPI_ISL_880750, EPI_ISL_880751, EPI_ISL_880752, EPI_ISL_880753, EPI_ISL_880754, EPI_ISL_880755, EPI_ISL_880756, EPI_ISL_880757, EPI_ISL_880758, EPI_ISL_880759, EPI_ISL_880760, EPI_ISL_880761, EPI_ISL_880762, EPI_ISL_880763, EPI_ISL_880764, EPI_ISL_880765, EPI_ISL_880766, EPI_ISL_880767, EPI_ISL_880768, EPI_ISL_880769, EPI_ISL_880770, EPI_ISL_880771, EPI_ISL_880772, EPI_ISL_880773, EPI_ISL_880774, EPI_ISL_880775, EPI_ISL_880776, EPI_ISL_880777, EPI_ISL_880778, EPI_ISL_880779, EPI_ISL_880780, EPI_ISL_880781, EPI_ISL_880782, EPI_ISL_880783, EPI_ISL_880784, EPI_ISL_880785, EPI_ISL_880786, EPI_ISL_880787, EPI_ISL_880788, EPI_ISL_880789, EPI_ISL_880790, EPI_ISL_880791, EPI_ISL_880792, EPI_ISL_880793, EPI_ISL_880794, EPI_ISL_880795, EPI_ISL_880796, EPI_ISL_880797, EPI_ISL_880798, EPI_ISL_880799, EPI_ISL_880800, EPI_ISL_880801, EPI_ISL_880802, EPI_ISL_880803, EPI_ISL_880804, EPI_ISL_880805, EPI_ISL_880806, EPI_ISL_880807, EPI_ISL_880808, EPI_ISL_880809, EPI_ISL_880810, EPI_ISL_880811, EPI_ISL_880812, EPI_ISL_880813, EPI_ISL_880814, EPI_ISL_880815, EPI_ISL_880816, EPI_ISL_880817, EPI_ISL_880818, EPI_ISL_880819, EPI_ISL_880820, EPI_ISL_880821, EPI_ISL_880822, EPI_ISL_880823, EPI_ISL_880824, EPI_ISL_880825, EPI_ISL_880826, EPI_ISL_880827, EPI_ISL_880828, EPI_ISL_880829, EPI_ISL_880830, EPI_ISL_880831, EPI_ISL_880832, EPI_ISL_880833, EPI_ISL_880834, EPI_ISL_880835, EPI_ISL_880836, EPI_ISL_880837, EPI_ISL_880838, EPI_ISL_880839, EPI_ISL_880840, EPI_ISL_880841, EPI_ISL_880842, EPI_ISL_880843, EPI_ISL_880844, EPI_ISL_880845, EPI_ISL_880846, EPI_ISL_880847, EPI_ISL_880848, EPI_ISL_880849, EPI_ISL_880850, EPI_ISL_880851, EPI_ISL_880852, EPI_ISL_880853, EPI_ISL_880854, EPI_ISL_880855, EPI_ISL_880856, EPI_ISL_880857, EPI_ISL_880858, EPI_ISL_880859, EPI_ISL_880860, EPI_ISL_880861, EPI_ISL_880862, EPI_ISL_880863, EPI_ISL_880864, EPI_ISL_880865, EPI_ISL_880866, EPI_ISL_880867, EPI_ISL_880868, EPI_ISL_880869, EPI_ISL_880870, EPI_ISL_880871, EPI_ISL_880872, EPI_ISL_880873, EPI_ISL_880874, EPI_ISL_880875, EPI_ISL_880876, EPI_ISL_880877, EPI_ISL_880878, EPI_ISL_880879, EPI_ISL_880880, EPI_ISL_880881, EPI_ISL_880882, EPI_ISL_880883, EPI_ISL_880884, EPI_ISL_880885, EPI_ISL_880886, EPI_ISL_880887, EPI_ISL_880888, EPI_ISL_880889, EPI_ISL_880890, EPI_ISL_880891, EPI_ISL_880892, EPI_ISL_880893, EPI_ISL_880894, EPI_ISL_880895, EPI_ISL_880896, EPI_ISL_880897, EPI_ISL_880898, EPI_ISL_880899, EPI_ISL_880900, EPI_ISL_880901, EPI_ISL_880902, EPI_ISL_880903, EPI_ISL_880904, EPI_ISL_880905, EPI_ISL_880906, EPI_ISL_880907, EPI_ISL_880908, EPI_ISL_880909, EPI_ISL_880910, EPI_ISL_880911, EPI_ISL_880912, EPI_ISL_880913, EPI_ISL_880914, EPI_ISL_880915, EPI_ISL_880916, EPI_ISL_880917, EPI_ISL_880918, EPI_ISL_880919, EPI_ISL_880920, EPI_ISL_880921, EPI_ISL_880922, EPI_ISL_880923, EPI_ISL_880924, EPI_ISL_880925, EPI_ISL_880926, EPI_ISL_880927, EPI_ISL_880928, EPI_ISL_880929, EPI_ISL_880930, EPI_ISL_880931, EPI_ISL_880932, EPI_ISL_880933, EPI_ISL_880934, EPI_ISL_880935 | see above | Lighthouse Lab in Milton Keynes | Wellcome Sanger Institute for the COVID-19 Genomics UK (COG-UK) Consortium | The Lighthouse Lab in Milton Keynes and Alex Alderton, Roberto Amato, Sonia Goncalves, Ewan Harrison, David K. Jackson, Ian Johnston, Dominic Kwiatkowski, Cordelia Langford, John Sillitoe on behalf of the Wellcome Sanger Institute COVID-19 Surveillance Team                                 |
| EPI_ISL_881277, EPI_ISL_881281, EPI_ISL_881283, EPI_ISL_881289, EPI_ISL_881290, EPI_ISL_881291, EPI_ISL_881293, EPI_ISL_881298, EPI_ISL_881306, EPI_ISL_881307, EPI_ISL_881309, EPI_ISL_881310, EPI_ISL_881315, EPI_ISL_881318, EPI_ISL_881326, EPI_ISL_881341, EPI_ISL_881359, EPI_ISL_881386, EPI_ISL_881388, EPI_ISL_881414, EPI_ISL_881429, EPI_ISL_881455, EPI_ISL_881461, EPI_ISL_881487, EPI_ISL_881494, EPI_ISL_881495, EPI_ISL_881509, EPI_ISL_881518, EPI_ISL_881521, EPI_ISL_881522, EPI_ISL_881531, EPI_ISL_881540, EPI_ISL_881543, EPI_ISL_881546, EPI_ISL_881550, EPI_ISL_881567, EPI_ISL_881570, EPI_ISL_881571, EPI_ISL_881576, EPI_ISL_881580, EPI_ISL_881582, EPI_ISL_881586, EPI_ISL_881588, EPI_ISL_881598, EPI_ISL_881600, EPI_ISL_881607, EPI_ISL_881612                                                                                                                                                                                                                                                                                                                                                                                                                                                                                                                                                                                                                                                                                                                                                                                                                                                                                                                                                                                                                                                                                                                                                                                                                                                                                                                                                                                                                                                                                                                                                                                                                                                                                                                                                                                                                                                                                                                                                                                                                                                                                                                                                                                                                                                                                                                                                                                                                                                                                                                                                                                                                                                                                                                                                                                                                                                                                                                                                                                                                                                                                                                                                                                                                                                                                                                                                                                                                                                                                                                                                                                                                                                                                                 | see above | Lighthouse Lab in Alderley Park | Wellcome Sanger Institute for the COVID-19 Genomics UK (COG-UK) Consortium | Jacquelyn Wynn, Mairead Hyland, The Lighthouse Lab in Alderley Park and Alex Alderton, Roberto Amato, Sonia Goncalves, Ewan Harrison, David K. Jackson, Ian Johnston, Dominic Kwiatkowski, Cordelia Langford, John Sillitoe on behalf of the Wellcome Sanger Institute COVID-19 Surveillance Team |
| EPI_ISL_881618                                                                                                                                                                                                                                                                                                                                                                                                                                                                                                                                                                                                                                                                                                                                                                                                                                                                                                                                                                                                                                                                                                                                                                                                                                                                                                                                                                                                                                                                                                                                                                                                                                                                                                                                                                                                                                                                                                                                                                                                                                                                                                                                                                                                                                                                                                                                                                                                                                                                                                                                                                                                                                                                                                                                                                                                                                                                                                                                                                                                                                                                                                                                                                                                                                                                                                                                                                                                                                                                                                                                                                                                                                                                                                                                                                                                                                                                                                                                                                                                                                                                                                                                                                                                                                                                                                                                                                                                                                                                 | EPI       |                                 |                                                                            |                                                                                                                                                                                                                                                                                                   |

|                                                                                                                                                                                                                                                                                                                                                                                                                                                                                                                                                                                                                                                                                                                                                                                                                                                                                                                                                                                                                                                                                                                                                                                                                                                                                                                                                                                                                                                                                |           |                                                                                                                                                                                                 |                                                                            |                                                                                                                                                                                                                                                                                                                                                                                                                                                                                                                                                                                                                                                                                          |
|--------------------------------------------------------------------------------------------------------------------------------------------------------------------------------------------------------------------------------------------------------------------------------------------------------------------------------------------------------------------------------------------------------------------------------------------------------------------------------------------------------------------------------------------------------------------------------------------------------------------------------------------------------------------------------------------------------------------------------------------------------------------------------------------------------------------------------------------------------------------------------------------------------------------------------------------------------------------------------------------------------------------------------------------------------------------------------------------------------------------------------------------------------------------------------------------------------------------------------------------------------------------------------------------------------------------------------------------------------------------------------------------------------------------------------------------------------------------------------|-----------|-------------------------------------------------------------------------------------------------------------------------------------------------------------------------------------------------|----------------------------------------------------------------------------|------------------------------------------------------------------------------------------------------------------------------------------------------------------------------------------------------------------------------------------------------------------------------------------------------------------------------------------------------------------------------------------------------------------------------------------------------------------------------------------------------------------------------------------------------------------------------------------------------------------------------------------------------------------------------------------|
| EPI_ISL_916630, EPI_ISL_916637, EPI_ISL_916651, EPI_ISL_916732, EPI_ISL_916746, EPI_ISL_916766, EPI_ISL_916775, EPI_ISL_916779, EPI_ISL_916849, EPI_ISL_916919, EPI_ISL_916934, EPI_ISL_916950, EPI_ISL_917011, EPI_ISL_917060, EPI_ISL_917095, EPI_ISL_917121, EPI_ISL_917792                                                                                                                                                                                                                                                                                                                                                                                                                                                                                                                                                                                                                                                                                                                                                                                                                                                                                                                                                                                                                                                                                                                                                                                                 | see above | Lighthouse Lab in Alderley Park                                                                                                                                                                 | Wellcome Sanger Institute for the COVID-19 Genomics UK (COG-UK) Consortium | Jacquelyn Wynn, Mairead Hyland, The Lighthouse Lab in Alderley Park and Alex Alderton, Roberto Amato, Sonia Goncalves, Ewan Harrison, David K. Jackson, Ian Johnston, Dominic Kwiatkowski, Cordelia Langford, John Sillitoe on behalf of the Wellcome Sanger Institute COVID-19 Surveillance Team                                                                                                                                                                                                                                                                                                                                                                                        |
| EPI_ISL_918686, EPI_ISL_918687, EPI_ISL_918688, EPI_ISL_918689, EPI_ISL_918690, EPI_ISL_918691, EPI_ISL_918692, EPI_ISL_918693, EPI_ISL_918694, EPI_ISL_918695, EPI_ISL_918696, EPI_ISL_918697, EPI_ISL_918698, EPI_ISL_918699, EPI_ISL_918700, EPI_ISL_918701, EPI_ISL_918703, EPI_ISL_918708, EPI_ISL_918709, EPI_ISL_918710, EPI_ISL_918713, EPI_ISL_918715, EPI_ISL_918716, EPI_ISL_918717, EPI_ISL_918719, EPI_ISL_918732, EPI_ISL_918733, EPI_ISL_918734, EPI_ISL_918859, EPI_ISL_918860, EPI_ISL_918861, EPI_ISL_918862, EPI_ISL_918863, EPI_ISL_918864, EPI_ISL_918866, EPI_ISL_918867, EPI_ISL_918868, EPI_ISL_918870, EPI_ISL_918871, EPI_ISL_918872, EPI_ISL_918873, EPI_ISL_918879, EPI_ISL_918880, EPI_ISL_918881, EPI_ISL_918884, EPI_ISL_918885, EPI_ISL_918886, EPI_ISL_918887, EPI_ISL_918888, EPI_ISL_918889, EPI_ISL_918891, EPI_ISL_918892, EPI_ISL_918893, EPI_ISL_918894, EPI_ISL_918895, EPI_ISL_918896, EPI_ISL_918897, EPI_ISL_918898, EPI_ISL_918899, EPI_ISL_918914, EPI_ISL_918915, EPI_ISL_918916, EPI_ISL_918917, EPI_ISL_918918, EPI_ISL_918919, EPI_ISL_918920, EPI_ISL_918921, EPI_ISL_918922, EPI_ISL_918923, EPI_ISL_918924, EPI_ISL_918925, EPI_ISL_918926, EPI_ISL_918927, EPI_ISL_918928, EPI_ISL_918929, EPI_ISL_918930, EPI_ISL_918931, EPI_ISL_918932, EPI_ISL_918933, EPI_ISL_918934, EPI_ISL_918935, EPI_ISL_918936, EPI_ISL_918937, EPI_ISL_918938, EPI_ISL_918939, EPI_ISL_918973, EPI_ISL_918974, EPI_ISL_918975, EPI_ISL_918976 | see above | University of Birmingham                                                                                                                                                                        | COVID-19 Genomics UK (COG-UK) Consortium                                   | Institute of Microbiology, University of Birmingham: Claire McMurray, Joanne Stockton, Samuel Nicholls, Radoslaw Poplawski, Will Rowe, Josh Quick, Nicholas Loman. University of Birmingham Testing Laboratory: Celina M Whalley, Andrew Bosworth, Charlotte Poxon, Kasun Wanigasooriya, Oliver Pickles, Mike Kidd, Alex Richter, Andrew D Beggs PHE Heartlands Lab: Husam Osman, Andrew Bosworth. Queen Elizabeth Hospital: Anna Casey                                                                                                                                                                                                                                                  |
| EPI_ISL_919011, EPI_ISL_919012, EPI_ISL_919017, EPI_ISL_919029, EPI_ISL_919037, EPI_ISL_919039, EPI_ISL_919041, EPI_ISL_919043, EPI_ISL_919044, EPI_ISL_919045, EPI_ISL_919046, EPI_ISL_919047, EPI_ISL_919048, EPI_ISL_919049, EPI_ISL_919050, EPI_ISL_919051, EPI_ISL_919052, EPI_ISL_919056, EPI_ISL_919071, EPI_ISL_919073, EPI_ISL_919077, EPI_ISL_919081, EPI_ISL_919089, EPI_ISL_919104, EPI_ISL_919105                                                                                                                                                                                                                                                                                                                                                                                                                                                                                                                                                                                                                                                                                                                                                                                                                                                                                                                                                                                                                                                                 | see above | Department of Pathology, University of Cambridge                                                                                                                                                | COVID-19 Genomics UK (COG-UK) Consortium                                   | Aminu S. Jahun, Yasmin Chaudhry, Iliana Georgiana, Myra Hosmillo, Rhys Izu, Martin D. Curran, Surendra Parmar, Ian Goodfellow                                                                                                                                                                                                                                                                                                                                                                                                                                                                                                                                                            |
| EPI_ISL_919190, EPI_ISL_919191, EPI_ISL_919192, EPI_ISL_919193, EPI_ISL_919194, EPI_ISL_919195, EPI_ISL_919196, EPI_ISL_919197                                                                                                                                                                                                                                                                                                                                                                                                                                                                                                                                                                                                                                                                                                                                                                                                                                                                                                                                                                                                                                                                                                                                                                                                                                                                                                                                                 | see above | West of Scotland Specialist Virology Centre, NHS GGC / MRC-University of Glasgow Centre for Virus Research                                                                                      | COVID-19 Genomics UK (COG-UK) Consortium                                   | Ana da Silva Filipe, Natasha Johnson, Kathy Smollett, Daniel Mair, Stephen Carmichael, Alice Brooks, Lily Tong, Jenna Nichols, Kyriaki Nomikou; Sarah McDonald; Richard Orton, Joseph Hughes, Sreenut Vattipally, David L Robertson; Alasdair MacLean, Rory Gunson; Sharif Shaaban, Matthew Holden; Rachel Blacow, Guy Mollett, Kathy Li, James Shepherd, Antonia Ho, Emma Thomson                                                                                                                                                                                                                                                                                                       |
| EPI_ISL_919337, EPI_ISL_919338                                                                                                                                                                                                                                                                                                                                                                                                                                                                                                                                                                                                                                                                                                                                                                                                                                                                                                                                                                                                                                                                                                                                                                                                                                                                                                                                                                                                                                                 | see above | Virology Department, Royal Infirmary of Edinburgh, NHS Lothian / School of Biological Sciences, University of Edinburgh / Institute of Genetics and Molecular Medicine, University of Edinburgh | COVID-19 Genomics UK (COG-UK) Consortium                                   | McHugh M, Dewar R, Rooke S, Gallagher M, Balczaca C, O'Toole A, Scher E, Hill V, McCrone JT, Colquhoun R, Yu X, Jackson B, Rambaut A, Williams TC, Templeton K                                                                                                                                                                                                                                                                                                                                                                                                                                                                                                                           |
| EPI_ISL_919462, EPI_ISL_919463, EPI_ISL_919465, EPI_ISL_919467, EPI_ISL_919468, EPI_ISL_919469, EPI_ISL_919470, EPI_ISL_919471, EPI_ISL_919472, EPI_ISL_919473, EPI_ISL_919474, EPI_ISL_919475, EPI_ISL_919478, EPI_ISL_919515, EPI_ISL_919517, EPI_ISL_919591, EPI_ISL_919593, EPI_ISL_919594, EPI_ISL_919595, EPI_ISL_919644                                                                                                                                                                                                                                                                                                                                                                                                                                                                                                                                                                                                                                                                                                                                                                                                                                                                                                                                                                                                                                                                                                                                                 | see above | Liverpool Clinical Laboratories                                                                                                                                                                 | COVID-19 Genomics UK (COG-UK) Consortium                                   | Sam Haldenby, Anita Lucaci, Steve Paterson, Julian Hiscoc, Alistair Darby, M Almsaud, A Alrezaihi, Muhannad Alruwaili, Stuart D Armstrong, Jones Benjamin, Eleanor G Bentley, Anu Chawla, Jordan J Clark, Angela Cowell, Richard Eccles, Isabel Garcia-Dorival, Matthew Gemmell, Alessandro Gerada, PKF Gilmore, Richard Gregory, Ximeng Han, Catherine Hartley, Margaret Hughes, Miren Iturriza-Gomara, James Johnson, L Luu, Jennifer Manson, Charlotte Nelson, Elaine O'Toole, Cassie Olateju, Rebekah Penrice-Randal, Lucille Rainbow, N.P Randle, Trevor Ian Robinson, Parul Sharma, Ghada T Shawli, James P Stewart, Neil Swainston, Ecaterina Vamos, Joanne Watts, Mark Whitehead |
| EPI_ISL_919841, EPI_ISL_919852                                                                                                                                                                                                                                                                                                                                                                                                                                                                                                                                                                                                                                                                                                                                                                                                                                                                                                                                                                                                                                                                                                                                                                                                                                                                                                                                                                                                                                                 | see above | Barts Health NHS Trust                                                                                                                                                                          | COVID-19 Genomics UK (COG-UK) Consortium                                   | CUTINO-MOGUEL, Maria-Teresa; HARRINGTON, David; OWOYEMI, Dola; KULASEGARAN-SHYLINI, Raghavendra; BROAD, Claire; KELE, Beatrix                                                                                                                                                                                                                                                                                                                                                                                                                                                                                                                                                            |
| EPI_ISL_919995, EPI_ISL_920000, EPI_ISL_920001, EPI_ISL_920002, EPI_ISL_920003, EPI_ISL_920004, EPI_ISL_920005, EPI_ISL_920006, EPI_ISL_920007, EPI_ISL_920008, EPI_ISL_920009, EPI_ISL_920010, EPI_ISL_920011, EPI_ISL_920012, EPI_ISL_920013, EPI_ISL_920014, EPI_ISL_920015, EPI_ISL_920016, EPI_ISL_920017, EPI_ISL_920018, EPI_ISL_920019, EPI_ISL_920020, EPI_ISL_920021, EPI_ISL_920022, EPI_ISL_920023, EPI_ISL_920024, EPI_ISL_920025, EPI_ISL_920027, EPI_ISL_920028, EPI_ISL_920029, EPI_ISL_920034, EPI_ISL_920042, EPI_ISL_920049, EPI_ISL_920050, EPI_ISL_920051                                                                                                                                                                                                                                                                                                                                                                                                                                                                                                                                                                                                                                                                                                                                                                                                                                                                                                 | see above | University College London, Great Ormond Street Hospital for Children NHS Foundation Trust, Imperial College Healthcare NHS Trust                                                                | COVID-19 Genomics UK (COG-UK) Consortium                                   | Sergi Castellano, Rachel Williams, Mark Kristiansen, Paola Resende Silva, Sunando Roy, Tony Brooks, Helena Tutill, Paola Niola, Patricia Dyal, Charlotte Williams, Leysa Forrest, Yasmin Panchbhaya, Jacqueline Findlay, Samuel Weeks, Julianne Brown, Kathryn Harris, Paul Randell, James Price, Alison Holmes, Judith Breuer                                                                                                                                                                                                                                                                                                                                                           |
| EPI_ISL_920188, EPI_ISL_920191, EPI_ISL_920193, EPI_ISL_920241, EPI_ISL_920298, EPI_ISL_920299, EPI_ISL_920309, EPI_ISL_920310, EPI_ISL_920318, EPI_ISL_920327, EPI_ISL_920328, EPI_ISL_920329, EPI_ISL_920330, EPI_ISL_920337, EPI_ISL_920338, EPI_ISL_920339, EPI_ISL_920345, EPI_ISL_920353, EPI_ISL_920357, EPI_ISL_920362, EPI_ISL_920363, EPI_ISL_920371, EPI_ISL_920458, EPI_ISL_920466, EPI_ISL_920467, EPI_ISL_920501                                                                                                                                                                                                                                                                                                                                                                                                                                                                                                                                                                                                                                                                                                                                                                                                                                                                                                                                                                                                                                                 | see above | University College London Hospital                                                                                                                                                              | COVID-19 Genomics UK (COG-UK) Consortium                                   | Judith Heaney, Matthew Byott, Catherine Houlihan, Dan Frampton, Stuart Kirk, Moira Spyer and Eleni Nastouli                                                                                                                                                                                                                                                                                                                                                                                                                                                                                                                                                                              |
| EPI_ISL_920851, EPI_ISL_920852, EPI_ISL_920853, EPI_ISL_920860, EPI_ISL_920861, EPI_ISL_920862, EPI_ISL_920863, EPI_ISL_920864, EPI_ISL_920865, EPI_ISL_920866, EPI_ISL_920867, EPI_ISL_920868, EPI_ISL_920869, EPI_ISL_920                                                                                                                                                                                                                                                                                                                                                                                                                                                                                                                                                                                                                                                                                                                                                                                                                                                                                                                                                                                                                                                                                                                                                                                                                                                    |           |                                                                                                                                                                                                 |                                                                            |                                                                                                                                                                                                                                                                                                                                                                                                                                                                                                                                                                                                                                                                                          |

|                                                                                                                                                                                                                                                                                                                                                                                                                                                                                                                                                                                                                                                                                                                                                                                                                                                                                                                                                                                                                                                                                                                                                                                                                                                                                                                                                                                                                                                                                                                                                                                                                                                                                                                                                                                                                                                |                                                                                                                                                                                                                     |                                                                            |                                                                                                                                                                                                                                                                                                                                                                                                                                        |
|------------------------------------------------------------------------------------------------------------------------------------------------------------------------------------------------------------------------------------------------------------------------------------------------------------------------------------------------------------------------------------------------------------------------------------------------------------------------------------------------------------------------------------------------------------------------------------------------------------------------------------------------------------------------------------------------------------------------------------------------------------------------------------------------------------------------------------------------------------------------------------------------------------------------------------------------------------------------------------------------------------------------------------------------------------------------------------------------------------------------------------------------------------------------------------------------------------------------------------------------------------------------------------------------------------------------------------------------------------------------------------------------------------------------------------------------------------------------------------------------------------------------------------------------------------------------------------------------------------------------------------------------------------------------------------------------------------------------------------------------------------------------------------------------------------------------------------------------|---------------------------------------------------------------------------------------------------------------------------------------------------------------------------------------------------------------------|----------------------------------------------------------------------------|----------------------------------------------------------------------------------------------------------------------------------------------------------------------------------------------------------------------------------------------------------------------------------------------------------------------------------------------------------------------------------------------------------------------------------------|
| EPI_ISL_923402, EPI_ISL_923403, EPI_ISL_923404, EPI_ISL_923405, EPI_ISL_923406, EPI_ISL_923407, EPI_ISL_923408, EPI_ISL_923409, EPI_ISL_923410, EPI_ISL_923411, EPI_ISL_923412, EPI_ISL_923413, EPI_ISL_923430, EPI_ISL_923539, EPI_ISL_923593, EPI_ISL_923605, EPI_ISL_923611, EPI_ISL_923613, EPI_ISL_923671, EPI_ISL_923678, EPI_ISL_923679                                                                                                                                                                                                                                                                                                                                                                                                                                                                                                                                                                                                                                                                                                                                                                                                                                                                                                                                                                                                                                                                                                                                                                                                                                                                                                                                                                                                                                                                                                 |                                                                                                                                                                                                                     |                                                                            |                                                                                                                                                                                                                                                                                                                                                                                                                                        |
| see above                                                                                                                                                                                                                                                                                                                                                                                                                                                                                                                                                                                                                                                                                                                                                                                                                                                                                                                                                                                                                                                                                                                                                                                                                                                                                                                                                                                                                                                                                                                                                                                                                                                                                                                                                                                                                                      | Centre for Enzyme Innovation, University of Portsmouth / Translational Research Laboratory, Portsmouth Hospitals NHS Trust                                                                                          | COVID-19 Genomics UK (COG-UK) Consortium                                   | Angela Beckett,Salman Goudarzi,Christopher Fearn,Kate Cook,Katie Loveson,Sharon Glaysher,Scott Elliott,Samuel Robson                                                                                                                                                                                                                                                                                                                   |
| EPI_ISL_924091, EPI_ISL_924182, EPI_ISL_924270, EPI_ISL_924285, EPI_ISL_924369                                                                                                                                                                                                                                                                                                                                                                                                                                                                                                                                                                                                                                                                                                                                                                                                                                                                                                                                                                                                                                                                                                                                                                                                                                                                                                                                                                                                                                                                                                                                                                                                                                                                                                                                                                 | Virology Department, Sheffield Teaching Hospitals NHS Foundation Trust/Department of Infection, Immunity and Cardiovascular Disease, The Medical School, University of Sheffield                                    | COVID-19 Genomics UK (COG-UK) Consortium                                   | Thushan de Silva, Matthew Parker, Nikki Smith, Adri Angyal, Rebecca Brown, Luke Green, Rachel Tucker, Paul Parsons, Danielle Groves, Katie Johnson, Laura Carrilero, Alex Keeley, Dave Partridge, Matthew Wyles, Benjamin Lindsey, Mehmet Yavuz, Mohammad Raza, Cariad Evans                                                                                                                                                           |
| EPI_ISL_924724, EPI_ISL_924725, EPI_ISL_924727, EPI_ISL_924728, EPI_ISL_924729, EPI_ISL_924731, EPI_ISL_924733, EPI_ISL_924736, EPI_ISL_924740, EPI_ISL_924742, EPI_ISL_924744, EPI_ISL_924746, EPI_ISL_924748, EPI_ISL_924749, EPI_ISL_924750, EPI_ISL_924752, EPI_ISL_924753, EPI_ISL_924754, EPI_ISL_924755, EPI_ISL_924756, EPI_ISL_924764, EPI_ISL_924769, EPI_ISL_924770, EPI_ISL_924774, EPI_ISL_924794, EPI_ISL_924795, EPI_ISL_924797, EPI_ISL_924798, EPI_ISL_924800, EPI_ISL_924805, EPI_ISL_924807, EPI_ISL_924808, EPI_ISL_924809, EPI_ISL_924816, EPI_ISL_924818, EPI_ISL_924819, EPI_ISL_924827, EPI_ISL_924828, EPI_ISL_924832, EPI_ISL_924836, EPI_ISL_924838, EPI_ISL_924839, EPI_ISL_924846, EPI_ISL_924848, EPI_ISL_924849, EPI_ISL_924850, EPI_ISL_924851, EPI_ISL_924855, EPI_ISL_924860, EPI_ISL_924863, EPI_ISL_924864, EPI_ISL_924865, EPI_ISL_924867, EPI_ISL_924871, EPI_ISL_924877, EPI_ISL_924879, EPI_ISL_924880, EPI_ISL_924883, EPI_ISL_924886, EPI_ISL_924887, EPI_ISL_924890, EPI_ISL_924891, EPI_ISL_924892, EPI_ISL_924895, EPI_ISL_924897, EPI_ISL_924899, EPI_ISL_924901, EPI_ISL_924902, EPI_ISL_924904, EPI_ISL_924905, EPI_ISL_924907, EPI_ISL_924908, EPI_ISL_924909, EPI_ISL_924910, EPI_ISL_924911, EPI_ISL_924912, EPI_ISL_924913, EPI_ISL_924914, EPI_ISL_924915, EPI_ISL_924916, EPI_ISL_924917, EPI_ISL_924918, EPI_ISL_924919, EPI_ISL_924921, EPI_ISL_924922, EPI_ISL_924923, EPI_ISL_924924, EPI_ISL_924925, EPI_ISL_924926, EPI_ISL_924927, EPI_ISL_924928, EPI_ISL_924929, EPI_ISL_924930, EPI_ISL_924931, EPI_ISL_924933, EPI_ISL_924935, EPI_ISL_924936, EPI_ISL_924937, EPI_ISL_924938, EPI_ISL_924939, EPI_ISL_924940, EPI_ISL_924941, EPI_ISL_924942, EPI_ISL_924943, EPI_ISL_924944, EPI_ISL_924945, EPI_ISL_924946, EPI_ISL_924947, EPI_ISL_924950, EPI_ISL_924975, EPI_ISL_924980 |                                                                                                                                                                                                                     |                                                                            |                                                                                                                                                                                                                                                                                                                                                                                                                                        |
| see above                                                                                                                                                                                                                                                                                                                                                                                                                                                                                                                                                                                                                                                                                                                                                                                                                                                                                                                                                                                                                                                                                                                                                                                                                                                                                                                                                                                                                                                                                                                                                                                                                                                                                                                                                                                                                                      | Bioinformatics and Biostatistics Lab, Advanced Sequencing Facility                                                                                                                                                  | COVID-19 Genomics UK (COG-UK) Consortium                                   | Aengus Stewart,Jerome Nicod,Chelsea Sawyer,Laura Cubitt,Harshil Patel,Margaret Crawford                                                                                                                                                                                                                                                                                                                                                |
| EPI_ISL_937818                                                                                                                                                                                                                                                                                                                                                                                                                                                                                                                                                                                                                                                                                                                                                                                                                                                                                                                                                                                                                                                                                                                                                                                                                                                                                                                                                                                                                                                                                                                                                                                                                                                                                                                                                                                                                                 | Lighthouse Lab in Alderley Park                                                                                                                                                                                     | Wellcome Sanger Institute for the COVID-19 Genomics UK (COG-UK) Consortium | Jacquelyn Wynn, Mairead Hyland, The Lighthouse Lab in Alderley Park and Alex Alderton, Roberto Amato, Sonia Goncalves, Ewan Harrison, David K. Jackson, Ian Johnston, Dominic Kwiatkowski, Cordelia Langford, John Sillitoe on behalf of the Wellcome Sanger Institute COVID-19 Surveillance Team                                                                                                                                      |
| EPI_ISL_945049, EPI_ISL_945056, EPI_ISL_945061, EPI_ISL_945072, EPI_ISL_945084, EPI_ISL_945095, EPI_ISL_945114, EPI_ISL_945115, EPI_ISL_945122, EPI_ISL_945125, EPI_ISL_945130, EPI_ISL_945142, EPI_ISL_945143, EPI_ISL_945146, EPI_ISL_945147, EPI_ISL_945152, EPI_ISL_945155, EPI_ISL_945163, EPI_ISL_945169, EPI_ISL_945181, EPI_ISL_945190, EPI_ISL_945197, EPI_ISL_945207, EPI_ISL_945208, EPI_ISL_945212, EPI_ISL_945217, EPI_ISL_945221, EPI_ISL_945236, EPI_ISL_945238, EPI_ISL_945241, EPI_ISL_945243, EPI_ISL_945244, EPI_ISL_945248, EPI_ISL_945250, EPI_ISL_945254, EPI_ISL_945275, EPI_ISL_945279, EPI_ISL_945285, EPI_ISL_945288, EPI_ISL_945297, EPI_ISL_945304, EPI_ISL_945309, EPI_ISL_945311, EPI_ISL_945319, EPI_ISL_945324, EPI_ISL_945332, EPI_ISL_945334, EPI_ISL_945337, EPI_ISL_945345, EPI_ISL_945347, EPI_ISL_945363, EPI_ISL_945364, EPI_ISL_945366                                                                                                                                                                                                                                                                                                                                                                                                                                                                                                                                                                                                                                                                                                                                                                                                                                                                                                                                                                 |                                                                                                                                                                                                                     |                                                                            |                                                                                                                                                                                                                                                                                                                                                                                                                                        |
| see above                                                                                                                                                                                                                                                                                                                                                                                                                                                                                                                                                                                                                                                                                                                                                                                                                                                                                                                                                                                                                                                                                                                                                                                                                                                                                                                                                                                                                                                                                                                                                                                                                                                                                                                                                                                                                                      | Lighthouse Lab in Cambridge                                                                                                                                                                                         | Wellcome Sanger Institute for the COVID-19 Genomics UK (COG-UK) Consortium | Rob Howes, The Lighthouse Lab in Cambridge and Alex Alderton, Roberto Amato, Sonia Goncalves, Ewan Harrison, David K. Jackson, Ian Johnston, Dominic Kwiatkowski, Cordelia Langford, John Sillitoe on behalf of the Wellcome Sanger Institute COVID-19 Surveillance Team                                                                                                                                                               |
| EPI_ISL_946701, EPI_ISL_946780                                                                                                                                                                                                                                                                                                                                                                                                                                                                                                                                                                                                                                                                                                                                                                                                                                                                                                                                                                                                                                                                                                                                                                                                                                                                                                                                                                                                                                                                                                                                                                                                                                                                                                                                                                                                                 | Lighthouse Lab in Alderley Park                                                                                                                                                                                     | Wellcome Sanger Institute for the COVID-19 Genomics UK (COG-UK) Consortium | Jacquelyn Wynn, Mairead Hyland, The Lighthouse Lab in Alderley Park and Alex Alderton, Roberto Amato, Sonia Goncalves, Ewan Harrison, David K. Jackson, Ian Johnston, Dominic Kwiatkowski, Cordelia Langford, John Sillitoe on behalf of the Wellcome Sanger Institute COVID-19 Surveillance Team                                                                                                                                      |
| EPI_ISL_949411                                                                                                                                                                                                                                                                                                                                                                                                                                                                                                                                                                                                                                                                                                                                                                                                                                                                                                                                                                                                                                                                                                                                                                                                                                                                                                                                                                                                                                                                                                                                                                                                                                                                                                                                                                                                                                 | University of Birmingham                                                                                                                                                                                            | COVID-19 Genomics UK (COG-UK) Consortium                                   | Institute of Microbiology, University of Birmingham: Claire McMurray, Joanne Stockton, Samuel Nicholls, Radoslaw Poplaski, Will Rowe, Josh Quick, Nicholas Loman. University of Birmingham Testing Laboratory: Celina M Whalley, Andrew Bosworth, Charlotte Poxon, Kasun Wanigasooriya, Oliver Pickles, Mike Kidd, Alex Richter, Andrew D Beggs PHE Heartlands Lab: Husam Osman, Andrew Bosworth. Queen Elizabeth Hospital: Anna Casey |
| EPI_ISL_949750, EPI_ISL_949757, EPI_ISL_949758, EPI_ISL_949759, EPI_ISL_949760, EPI_ISL_949762, EPI_ISL_949763, EPI_ISL_949764, EPI_ISL_949765, EPI_ISL_949766, EPI_ISL_949768, EPI_ISL_949771, EPI_ISL_949772, EPI_ISL_949773, EPI_ISL_949774, EPI_ISL_949776, EPI_ISL_949779, EPI_ISL_949781, EPI_ISL_949782                                                                                                                                                                                                                                                                                                                                                                                                                                                                                                                                                                                                                                                                                                                                                                                                                                                                                                                                                                                                                                                                                                                                                                                                                                                                                                                                                                                                                                                                                                                                 |                                                                                                                                                                                                                     |                                                                            |                                                                                                                                                                                                                                                                                                                                                                                                                                        |
| see above                                                                                                                                                                                                                                                                                                                                                                                                                                                                                                                                                                                                                                                                                                                                                                                                                                                                                                                                                                                                                                                                                                                                                                                                                                                                                                                                                                                                                                                                                                                                                                                                                                                                                                                                                                                                                                      | Barts Health NHS Trust                                                                                                                                                                                              | COVID-19 Genomics UK (COG-UK) Consortium                                   | CUTINO-MOGUEL, Maria-Teresa; HARRINGTON, David; OWOYEMI, Dola; KULASEGARAN-SHYLINI, Raghavendran; BROAD, Claire; KELE, Beatrix                                                                                                                                                                                                                                                                                                         |
| EPI_ISL_949788, EPI_ISL_949789, EPI_ISL_949790, EPI_ISL_949927, EPI_ISL_950069, EPI_ISL_950070, EPI_ISL_950071, EPI_ISL_950072, EPI_ISL_950074, EPI_ISL_950075, EPI_ISL_950077, EPI_ISL_950079, EPI_ISL_950080, EPI_ISL_950083, EPI_ISL_950084, EPI_ISL_950085, EPI_ISL_950087, EPI_ISL_950088, EPI_ISL_950090, EPI_ISL_950092, EPI_ISL_950097, EPI_ISL_950098, EPI_ISL_950100, EPI_ISL_950101, EPI_ISL_950102, EPI_ISL_950104, EPI_ISL_950107, EPI_ISL_950108, EPI_ISL_950109, EPI_ISL_950110, EPI_ISL_950112, EPI_ISL_950114, EPI_ISL_950115, EPI_ISL_950117, EPI_ISL_950119, EPI_ISL_950120, EPI_ISL_950125, EPI_ISL_950126, EPI_ISL_950128, EPI_ISL_950129, EPI_ISL_950150, EPI_ISL_950155, EPI_ISL_950162, EPI_ISL_950163, EPI_ISL_950164, EPI_ISL_950169                                                                                                                                                                                                                                                                                                                                                                                                                                                                                                                                                                                                                                                                                                                                                                                                                                                                                                                                                                                                                                                                                 |                                                                                                                                                                                                                     |                                                                            |                                                                                                                                                                                                                                                                                                                                                                                                                                        |
| see above                                                                                                                                                                                                                                                                                                                                                                                                                                                                                                                                                                                                                                                                                                                                                                                                                                                                                                                                                                                                                                                                                                                                                                                                                                                                                                                                                                                                                                                                                                                                                                                                                                                                                                                                                                                                                                      | University College London, Great Ormond Street Hospital for Children NHS Foundation Trust, Imperial College Healthcare NHS Trust                                                                                    | COVID-19 Genomics UK (COG-UK) Consortium                                   | Sergi Castellano, Rachel Williams, Mark Kristiansen, Paola Resende Silva, Sunando Roy, Tony Brooks, Helena Tutill, Paola Niola, Patricia Dyal, Charlotte Williams, Leysa Forrest, Yasmin Panchbhaya, Jacqueline Findlay, Samuel Weeks, Julianne Brown, Kathryn Harris, Paul Randell, James Price, Alison Holmes, Judith Breuer                                                                                                         |
| EPI_ISL_950272, EPI_ISL_950280, EPI_ISL_950282, EPI_ISL_950283, EPI_ISL_950284, EPI_ISL_950285, EPI_ISL_950289, EPI_ISL_950290, EPI_ISL_950291, EPI_ISL_950292, EPI_ISL_950293, EPI_ISL_950297                                                                                                                                                                                                                                                                                                                                                                                                                                                                                                                                                                                                                                                                                                                                                                                                                                                                                                                                                                                                                                                                                                                                                                                                                                                                                                                                                                                                                                                                                                                                                                                                                                                 |                                                                                                                                                                                                                     |                                                                            |                                                                                                                                                                                                                                                                                                                                                                                                                                        |
| see above                                                                                                                                                                                                                                                                                                                                                                                                                                                                                                                                                                                                                                                                                                                                                                                                                                                                                                                                                                                                                                                                                                                                                                                                                                                                                                                                                                                                                                                                                                                                                                                                                                                                                                                                                                                                                                      | Northumbria University / South Tees Hospitals NHS Foundation Trust / North Cumbria Integrated Care NHS Foundation Trust / North Tees and Hartlepool NHS Foundation Trust / Newcastle Hospitals NHS Foundation Trust | COVID-19 Genomics UK (COG-UK) Consortium                                   | Darren L Smith,Andrew Nelson,Matthew Bashton,Greg R Young,Joshua Loh,John Allan,Mohammad A Tariq,Giles S Holt,Gary Black,Wen C Yew,Lynn Dover,Paul Baker,Steve Liggett,Sarah Essex,Jane Greenaway,Debra Padgett,Clive Graham,Garren Scott,Edward Barton,Emma Swindells,Brendan Payne,Jennifer Collins,Yusri Taha,Gary Eltringham                                                                                                       |
| EPI_ISL_950713                                                                                                                                                                                                                                                                                                                                                                                                                                                                                                                                                                                                                                                                                                                                                                                                                                                                                                                                                                                                                                                                                                                                                                                                                                                                                                                                                                                                                                                                                                                                                                                                                                                                                                                                                                                                                                 | Lincolnshire Hospitals and DeepSeq Nottingham                                                                                                                                                                       | COVID-19 Genomics UK (COG-UK) Consortium                                   | Nichola Duckworth, Tim Sloan, Sarah Walsh, Jonathan Ball, Patrick McClure, Joeseph Chappell, Nadine Holmes, Matthew Carlisle, Christopher Moore, Fei Sang, Johnny Debebe, Victoria Wright, Matthew Loose                                                                                                                                                                                                                               |
| EPI_ISL_951231, EPI_ISL_951232, EPI_ISL_951237, EPI_ISL_951238, EPI_ISL_951239, EPI_ISL_951241, EPI_ISL_951245, EPI_ISL_951246, EPI_ISL_951247, EPI_ISL_951248, EPI_ISL_951252, EPI_ISL_951254, EPI_ISL_951255, EPI_ISL_951256, EPI_ISL_951258, EPI_ISL_951264, EPI_ISL_951265, EPI_ISL_951267, EPI_ISL_951268, EPI_ISL_951269, EPI_ISL_951270, EPI_ISL_951271, EPI_ISL_951272, EPI_ISL_951273, EPI_ISL_951274, EPI_ISL_951275, EPI_ISL_951276, EPI_ISL_951277, EPI_ISL_951281, EPI_ISL_951282, EPI_ISL_951283, EPI_ISL_951286, EPI_ISL_951287, EPI_ISL_951288, EPI_ISL_951289, EPI_ISL_951290, EPI_ISL_951291, EPI_ISL_951293, EPI_ISL_951294, EPI_ISL_951297, EPI_ISL_951299, EPI_ISL_951300, EPI_ISL_951301, EPI_ISL_951304, EPI_ISL_951307, EPI_ISL_951308, EPI_ISL_951309, EPI_ISL_951316, EPI_ISL_951317, EPI_ISL_951345, EPI_ISL_951346, EPI_ISL_951347, EPI_ISL_951348, EPI_ISL_951349, EPI_ISL_951350, EPI_ISL_951351, EPI_ISL_951352, EPI_ISL_951353, EPI_ISL_951354, EPI_ISL_951356, EPI_ISL_951362, EPI_ISL_951363, EPI_ISL_951364, EPI_ISL_951366, EPI_ISL_951367, EPI_ISL_951376, EPI_ISL_951377, EPI_ISL_951389, EPI_ISL_951391, EPI_ISL_951392, EPI_ISL_951393, EPI_ISL_951395, EPI_ISL_951396, EPI_ISL_951404, EPI_ISL_951405, EPI_ISL_951406, EPI_ISL_951407, EPI_ISL_951408, EPI_ISL_951409, EPI_ISL_951412, EPI_ISL_951413, EPI_ISL_951414, EPI_ISL_951415, EPI_ISL_951417, EPI_ISL_951426, EPI_ISL_951427, EPI_ISL_951429, EPI_ISL_951439                                                                                                                                                                                                                                                                                                                                                                                 |                                                                                                                                                                                                                     |                                                                            |                                                                                                                                                                                                                                                                                                                                                                                                                                        |
| see above                                                                                                                                                                                                                                                                                                                                                                                                                                                                                                                                                                                                                                                                                                                                                                                                                                                                                                                                                                                                                                                                                                                                                                                                                                                                                                                                                                                                                                                                                                                                                                                                                                                                                                                                                                                                                                      | Oxford Viromics, NDM, University of Oxford; Oxford University Hospitals; Basingstoke and North Hampshire Hospital                                                                                                   | COVID-19 Genomics UK (COG-UK) Consortium                                   | Tanya Golubchik, David Bonsall, George Macintyre, Amy Trebes, Mariateresa de Cesare, Catrin Moore, Alex Mobbs, Anita Justice, Robert Shaw, Monique Andersson, Timothy Peto, Emma Wise, Nathan Moore, Jessica Lynch, Nick Cortes, Matilde Mori, Stephen Kidd, David Buck, John Todd, Christophe Fraser                                                                                                                                  |
| EPI_ISL_952381, EPI_ISL_952384, EPI_ISL_952388, EPI_ISL_952396, EPI_ISL_952400, EPI_ISL_952401, EPI_ISL_952402, EPI_ISL_952406, EPI_ISL_952413, EPI_ISL_952415, EPI_ISL_952419, EPI_ISL_952421, EPI_ISL_952425, EPI_ISL_952426, EPI_ISL_952434, EPI_ISL_952559, EPI_ISL_952561, EPI_ISL_952563, EPI_ISL_952565, EPI_ISL_952566, EPI_ISL_952567, EPI_ISL_952568, EPI_ISL_952777, EPI_ISL_952781, EPI_ISL_952782, EPI_ISL_952784, EPI_ISL_952786, EPI_ISL_952787, EPI_ISL_952788, EPI_ISL_952790, EPI_ISL_952791, EPI_ISL_952792, EPI_ISL_952796, EPI_ISL_952797, EPI_ISL_952800, EPI_ISL_952801, EPI_ISL_952802, EPI_ISL_952803, EPI_ISL_952805, EPI_ISL_952806, EPI_ISL_952807, EPI_ISL_952808, EPI_ISL_952809, EPI_ISL_952810, EPI_ISL_952811, EPI_ISL_952812, EPI_ISL_952819                                                                                                                                                                                                                                                                                                                                                                                                                                                                                                                                                                                                                                                                                                                                                                                                                                                                                                                                                                                                                                                                 |                                                                                                                                                                                                                     |                                                                            |                                                                                                                                                                                                                                                                                                                                                                                                                                        |
| see above                                                                                                                                                                                                                                                                                                                                                                                                                                                                                                                                                                                                                                                                                                                                                                                                                                                                                                                                                                                                                                                                                                                                                                                                                                                                                                                                                                                                                                                                                                                                                                                                                                                                                                                                                                                                                                      | Centre for Enzyme Innovation, University of Portsmouth / Translational Research Laboratory, Portsmouth Hospitals NHS Trust                                                                                          | COVID-19 Genomics UK (COG-UK) Consortium                                   | Angela Beckett,Salman Goudarzi,Christopher Fearn,Kate Cook,Katie Loveson,Sharon Glaysher,Scott Elliott,Samuel Robson                                                                                                                                                                                                                                                                                                                   |
| EPI_ISL_953177, EPI_ISL_953180, EPI_ISL_953181, EPI_ISL_953182, EPI_ISL_953185, EPI_ISL_953187, EPI_ISL_953193, EPI_ISL_953199, EPI_ISL_953205, EPI_ISL_953207, EPI_ISL_953216, EPI_ISL_953217, EPI_ISL_953219, EPI_ISL_953222, EPI_ISL_953226, EPI_ISL_953230, EPI_ISL_953231, EPI_ISL_953232, EPI_ISL_953233, EPI_ISL_953236, EPI_ISL_953238, EPI_ISL_953239                                                                                                                                                                                                                                                                                                                                                                                                                                                                                                                                                                                                                                                                                                                                                                                                                                                                                                                                                                                                                                                                                                                                                                                                                                                                                                                                                                                                                                                                                 |                                                                                                                                                                                                                     |                                                                            |                                                                                                                                                                                                                                                                                                                                                                                                                                        |
| see above                                                                                                                                                                                                                                                                                                                                                                                                                                                                                                                                                                                                                                                                                                                                                                                                                                                                                                                                                                                                                                                                                                                                                                                                                                                                                                                                                                                                                                                                                                                                                                                                                                                                                                                                                                                                                                      | Bioinformatics and Biostatistics Lab, Advanced Sequencing Facility                                                                                                                                                  | COVID-19 Genomics UK (COG-UK) Consortium                                   | Aengus Stewart,Jerome Nicod,Chelsea Sawyer,Laura Cubitt,Harshil Patel,Margaret Crawford                                                                                                                                                                                                                                                                                                                                                |
| EPI_ISL_959273                                                                                                                                                                                                                                                                                                                                                                                                                                                                                                                                                                                                                                                                                                                                                                                                                                                                                                                                                                                                                                                                                                                                                                                                                                                                                                                                                                                                                                                                                                                                                                                                                                                                                                                                                                                                                                 | Lighthouse Lab in Milton Keynes                                                                                                                                                                                     | Wellcome Sanger Institute for the COVID-19 Genomics UK (COG-UK) Consortium | The Lighthouse Lab in Milton Keynes and Alex Alderton, Roberto Amato, Sonia Goncalves, Ewan Harrison, David K. Jackson, Ian Johnston, Dominic Kwiatkowski, Cordelia Langford, John Sillitoe on behalf of the Wellcome Sanger Institute COVID-19 Surveillance Team                                                                                                                                                                      |
| EPI_ISL_963061, EPI_ISL_963296, EPI_ISL_963955                                                                                                                                                                                                                                                                                                                                                                                                                                                                                                                                                                                                                                                                                                                                                                                                                                                                                                                                                                                                                                                                                                                                                                                                                                                                                                                                                                                                                                                                                                                                                                                                                                                                                                                                                                                                 | Lighthouse Lab in Alderley Park                                                                                                                                                                                     | Wellcome Sanger Institute for the COVID-19 Genomics UK (COG-UK) Consortium | Jacquelyn Wynn, Mairead Hyland, The Lighthouse Lab in Alderley Park and Alex Alderton, Roberto Amato, Sonia Goncalves, Ewan Harrison, David K. Jackson, Ian Johnston, Dominic Kwiatkowski, Cordelia Langford, John Sillitoe on behalf of the Wellcome Sanger Institute COVID-19 Surveillance Team                                                                                                                                      |
| EPI_ISL_987284, EPI_ISL_987285, EPI_ISL_987286, EPI_ISL_987297, EPI_ISL_987298, EPI_ISL_987305, EPI_ISL_987329, EPI_ISL_987338, EPI_ISL_987342, EPI_ISL_987343, EPI_ISL_987346, EPI_ISL_987351, EPI_ISL_987352, EPI_ISL_987353, EPI_ISL_987358, EPI_ISL_987364, EPI_ISL_987366, EPI_ISL_987371, EPI_ISL_987374, EPI_ISL_987386, EPI_ISL_987388, EPI_ISL_987396, EPI_ISL_987400, EPI_ISL_987403, EPI_ISL_987423, EPI_ISL_987431, EPI_ISL_987434, EPI_ISL_987442, EPI_ISL_987447, EPI_ISL_987459, EPI_ISL_987460, EPI_ISL_987463, EPI_ISL_987466, EPI_ISL_987468, EPI_ISL_987473, EPI_ISL_987477, EPI_ISL_987487, EPI_ISL_987492, EPI_ISL_987494, EPI_ISL_987495, EPI_ISL_987500, EPI_ISL_987504, EPI_ISL_987512, EPI_ISL_987515, EPI_ISL_987528, EPI_ISL_987531, EPI_ISL_987533, EPI_ISL_987537, EPI_ISL_987538, EPI_ISL_987539, EPI_ISL_987543, EPI_ISL_987551, EPI_ISL_987558, EPI_ISL_987563, EPI_ISL_987564, EPI_ISL_987565, EPI_ISL_987569, EPI_ISL_987580, EPI_ISL_987582, EPI_ISL_987586, EPI_ISL_987588, EPI_ISL_987592, EPI_ISL_987600, EPI_ISL_987601, EPI_ISL_987608, EPI_ISL_987618, EPI_ISL_987626, EPI_ISL_987630, EPI_ISL_987632, EPI_ISL_987634, EPI_ISL_987635                                                                                                                                                                                                                                                                                                                                                                                                                                                                                                                                                                                                                                                                 |                                                                                                                                                                                                                     |                                                                            |                                                                                                                                                                                                                                                                                                                                                                                                                                        |
| see above                                                                                                                                                                                                                                                                                                                                                                                                                                                                                                                                                                                                                                                                                                                                                                                                                                                                                                                                                                                                                                                                                                                                                                                                                                                                                                                                                                                                                                                                                                                                                                                                                                                                                                                                                                                                                                      | Lighthouse Lab in Milton Keynes                                                                                                                                                                                     | Wellcome Sanger Institute for the COVID-19 Genomics UK (COG-UK) Consortium | The Lighthouse Lab in Milton Keynes and Alex Alderton, Roberto Amato, Sonia Goncalves, Ewan Harrison, David K. Jackson, Ian Johnston, Dominic Kwiatkowski, Cordelia Langford, John Sillitoe on behalf of the Wellcome Sanger Institute COVID-19 Surveillance Team ( <a href="http://www.sanger.ac.uk/covid-team">http://www.sanger.ac.uk/covid-team</a> )                                                                              |

|                                                                                                                                                                                                                                                                                                                                                                                                                                                                                                                                                                                                                                                                                                                                                                                                                                                                                                                                                                                                                                                                                                                                                                                                                                                                                                                |                                                                                                                                                                                                                     |                                                                            |                                                                                                                                                                                                                                                                                                                                                                                                                                                                                                                                                                                                                                                                                         |
|----------------------------------------------------------------------------------------------------------------------------------------------------------------------------------------------------------------------------------------------------------------------------------------------------------------------------------------------------------------------------------------------------------------------------------------------------------------------------------------------------------------------------------------------------------------------------------------------------------------------------------------------------------------------------------------------------------------------------------------------------------------------------------------------------------------------------------------------------------------------------------------------------------------------------------------------------------------------------------------------------------------------------------------------------------------------------------------------------------------------------------------------------------------------------------------------------------------------------------------------------------------------------------------------------------------|---------------------------------------------------------------------------------------------------------------------------------------------------------------------------------------------------------------------|----------------------------------------------------------------------------|-----------------------------------------------------------------------------------------------------------------------------------------------------------------------------------------------------------------------------------------------------------------------------------------------------------------------------------------------------------------------------------------------------------------------------------------------------------------------------------------------------------------------------------------------------------------------------------------------------------------------------------------------------------------------------------------|
| EPI_ISL_990545, EPI_ISL_994649, EPI_ISL_994650                                                                                                                                                                                                                                                                                                                                                                                                                                                                                                                                                                                                                                                                                                                                                                                                                                                                                                                                                                                                                                                                                                                                                                                                                                                                 | Lighthouse Lab in Alderley Park                                                                                                                                                                                     | Wellcome Sanger Institute for the COVID-19 Genomics UK (COG-UK) Consortium | Jacquelyn Wynn, Mairead Hyland, The Lighthouse Lab in Alderley Park and Alex Alderton, Roberto Amato, Sonia Goncalves, Ewan Harrison, David K. Jackson, Ian Johnston, Dominic Kwiatkowski, Cordelia Langford, John Sillitoe on behalf of the Wellcome Sanger Institute COVID-19 Surveillance Team                                                                                                                                                                                                                                                                                                                                                                                       |
| EPI_ISL_996427, EPI_ISL_996428, EPI_ISL_996429, EPI_ISL_996430, EPI_ISL_996436                                                                                                                                                                                                                                                                                                                                                                                                                                                                                                                                                                                                                                                                                                                                                                                                                                                                                                                                                                                                                                                                                                                                                                                                                                 | University of Birmingham                                                                                                                                                                                            | COVID-19 Genomics UK (COG-UK) Consortium                                   | Institute of Microbiology, University of Birmingham: Claire McMurray, Joanne Stockton, Samuel Nicholls, Radoslaw Poplawski, Will Rowe, Josh Quick, Nicholas Loman, University of Birmingham Testing Laboratory: Celina M Whalley, Andrew Bosworth, Charlotte Poxon, Kasun Wanigasooriya, Oliver Pickles, Mike Kidd, Alex Richter, Andrew D Beggs PHE Heartlands Lab: Husam Osman, Andrew Bosworth. Queen Elizabeth Hospital: Anna Casey                                                                                                                                                                                                                                                 |
| EPI_ISL_996514, EPI_ISL_996515, EPI_ISL_996516, EPI_ISL_996517, EPI_ISL_996518, EPI_ISL_996519, EPI_ISL_996520, EPI_ISL_996522, EPI_ISL_996523, EPI_ISL_996524, EPI_ISL_996525, EPI_ISL_996526, EPI_ISL_996531, EPI_ISL_996532, EPI_ISL_996533, EPI_ISL_996534, EPI_ISL_996535, EPI_ISL_996536, EPI_ISL_996537, EPI_ISL_996571, EPI_ISL_996580, EPI_ISL_996581, EPI_ISL_996583, EPI_ISL_996584, EPI_ISL_996592                                                                                                                                                                                                                                                                                                                                                                                                                                                                                                                                                                                                                                                                                                                                                                                                                                                                                                 |                                                                                                                                                                                                                     |                                                                            |                                                                                                                                                                                                                                                                                                                                                                                                                                                                                                                                                                                                                                                                                         |
| see above                                                                                                                                                                                                                                                                                                                                                                                                                                                                                                                                                                                                                                                                                                                                                                                                                                                                                                                                                                                                                                                                                                                                                                                                                                                                                                      | University of Exeter                                                                                                                                                                                                | COVID-19 Genomics UK (COG-UK) Consortium                                   | Ben Temperton, Aaron Jeffries, Michelle Michelsen, Joanna Warwick-Dugdale, Audrey Farbos, Robyn Manley, Stephen Michell, Jane Masoli                                                                                                                                                                                                                                                                                                                                                                                                                                                                                                                                                    |
| EPI_ISL_997074                                                                                                                                                                                                                                                                                                                                                                                                                                                                                                                                                                                                                                                                                                                                                                                                                                                                                                                                                                                                                                                                                                                                                                                                                                                                                                 | Virology Department, Royal Infirmary of Edinburgh, NHS Lothian / School of Biological Sciences, University of Edinburgh                                                                                             | COVID-19 Genomics UK (COG-UK) Consortium                                   | McHugh M, Dewar R, Cotton S, Rooke S, O'Toole Á, Scher E, Hill V, McCrone JT, Colquhoun R, Yu X, Jackson B, Rambaut A, Templeton K                                                                                                                                                                                                                                                                                                                                                                                                                                                                                                                                                      |
| EPI_ISL_997326, EPI_ISL_997327                                                                                                                                                                                                                                                                                                                                                                                                                                                                                                                                                                                                                                                                                                                                                                                                                                                                                                                                                                                                                                                                                                                                                                                                                                                                                 | University of Exeter                                                                                                                                                                                                | COVID-19 Genomics UK (COG-UK) Consortium                                   | Ben Temperton, Aaron Jeffries, Michelle Michelsen, Joanna Warwick-Dugdale, Audrey Farbos, Robyn Manley, Stephen Michell, Jane Masoli                                                                                                                                                                                                                                                                                                                                                                                                                                                                                                                                                    |
| EPI_ISL_997377                                                                                                                                                                                                                                                                                                                                                                                                                                                                                                                                                                                                                                                                                                                                                                                                                                                                                                                                                                                                                                                                                                                                                                                                                                                                                                 | Liverpool Clinical Laboratories                                                                                                                                                                                     | COVID-19 Genomics UK (COG-UK) Consortium                                   | Sam Haldenby, Anita Lucaci, Steve Paterson, Julian Hiscox, Alistair Darby, M Almsaud, A Alrezaihi, Muhannad Alruwaili, Stuart D Armstrong, Jones Benjamin, Eleanor G Bentley, Anu Chawla, Jordan J Clark, Angela Cowell, Richard Eccles, Isabel Garcia-Dorival, Matthew Gemmell, Alessandro Gerada, PKF Gilmore, Richard Gregory, Ximeng Han, Catherine Hartley, Margaret Hughes, Miren Iturriza-Gomara, James Johnson, L Luu, Jenifer Manson, Charlotte Nelson, Elaine O'Toole, Cassie Olateju, Rebekah Penrice-Randal, Lucille Rainbow, N.P Randle, Trevor Ian Robinson, Parul Sharma, Ghada T Shawli, James P Stewart, Neil Swainston, Ecaterina Vamos, Joanne Watts, Mark Whitehead |
| EPI_ISL_997629, EPI_ISL_997675, EPI_ISL_997676                                                                                                                                                                                                                                                                                                                                                                                                                                                                                                                                                                                                                                                                                                                                                                                                                                                                                                                                                                                                                                                                                                                                                                                                                                                                 | Barts Health NHS Trust                                                                                                                                                                                              | COVID-19 Genomics UK (COG-UK) Consortium                                   | CUTINO-MOGUEL, Maria-Teresa; HARRINGTON, David; OWOYEMI, Dola; KULASEGARAN-SHYLINI, Raghavendran; BROAD, Claire; KELE, Beatrix                                                                                                                                                                                                                                                                                                                                                                                                                                                                                                                                                          |
| EPI_ISL_997839                                                                                                                                                                                                                                                                                                                                                                                                                                                                                                                                                                                                                                                                                                                                                                                                                                                                                                                                                                                                                                                                                                                                                                                                                                                                                                 | University College London, Great Ormond Street Hospital for Children NHS Foundation Trust, Imperial College Healthcare NHS Trust                                                                                    | COVID-19 Genomics UK (COG-UK) Consortium                                   | Sergi Castellano, Rachel Williams, Mark Kristiansen, Paola Resende Silva, Sunando Roy, Tony Brooks, Helena Tutill, Paola Niola, Patricia Dyal, Charlotte Williams, Leysa Forrest, Yasmin Panchbhaya, Jacqueline Findlay, Samuel Weeks, Julianne Brown, Kathryn Harris, Paul Randell, James Price, Alison Holmes, Judith Breuer                                                                                                                                                                                                                                                                                                                                                          |
| EPI_ISL_998136, EPI_ISL_998140, EPI_ISL_998144, EPI_ISL_998154, EPI_ISL_998158, EPI_ISL_998159, EPI_ISL_998163                                                                                                                                                                                                                                                                                                                                                                                                                                                                                                                                                                                                                                                                                                                                                                                                                                                                                                                                                                                                                                                                                                                                                                                                 | Regional Virus Laboratory, Belfast Health and Social Care Trust                                                                                                                                                     | COVID-19 Genomics UK (COG-UK) Consortium                                   | Conall McCaughey, James McKenna, Tanya Curran, Susan Feeney, Alison Watt, Ciara Cox, Mairead Connor, Zoltan Molnar, David Simpson, Derek Fairley                                                                                                                                                                                                                                                                                                                                                                                                                                                                                                                                        |
| EPI_ISL_998371, EPI_ISL_998749                                                                                                                                                                                                                                                                                                                                                                                                                                                                                                                                                                                                                                                                                                                                                                                                                                                                                                                                                                                                                                                                                                                                                                                                                                                                                 | Northumbria University / South Tees Hospitals NHS Foundation Trust / North Cumbria Integrated Care NHS Foundation Trust / North Tees and Hartlepool NHS Foundation Trust / Newcastle Hospitals NHS Foundation Trust | COVID-19 Genomics UK (COG-UK) Consortium                                   | Darren L Smith, Andrew Nelson, Matthew Bashton, Greg R Young, Joshua Loh, John Allan, Mohammad A Tariq, Giles S Holt, Gary Black, Wen C Yew, Lynn Dover, Paul Baker, Steve Liggett, Sarah Essex, Jane Greenaway, Debra Padgett, Clive Graham, Garren Scott, Edward Barton, Emma Swindells, Brendan Payne, Jennifer Collins, Yusri Taha, Gary Eltringham                                                                                                                                                                                                                                                                                                                                 |
| EPI_ISL_998830, EPI_ISL_998832                                                                                                                                                                                                                                                                                                                                                                                                                                                                                                                                                                                                                                                                                                                                                                                                                                                                                                                                                                                                                                                                                                                                                                                                                                                                                 | Quadram Institute Bioscience                                                                                                                                                                                        | COVID-19 Genomics UK (COG-UK) Consortium                                   | Dave J. Baker, Gemma L. Kay, Alp Aydin, Thanh Le-Viet, Steven Rudder, Ana P. Tedim, Anastasia Kolyva, Maria Diaz, Leonardo de Oliveira Martins, Nabil-Fareed Alikhan, Lizzie Meadows, Rachael Stanley, Ngozi Elumogo, Muhammed Yasir, Nicholas M. Thomson, Alexander J Trotter, Rachel Gilroy, Samuel Bloomfield, Claire Stuart, Andrew Bell, Reenesh Prakash, Samir Dervisevic, Alison E. Mather, John Wain, Mark Webber, Andrew J. Page, Justin O'Grady                                                                                                                                                                                                                               |
| EPI_ISL_998937, EPI_ISL_998938, EPI_ISL_998939, EPI_ISL_998940, EPI_ISL_998941, EPI_ISL_998942, EPI_ISL_998943, EPI_ISL_998944                                                                                                                                                                                                                                                                                                                                                                                                                                                                                                                                                                                                                                                                                                                                                                                                                                                                                                                                                                                                                                                                                                                                                                                 | Lincolnshire Hospitals and DeepSeq Nottingham                                                                                                                                                                       | COVID-19 Genomics UK (COG-UK) Consortium                                   | Nichola Duckworth, Tim Sloan, Sarah Walsh, Jonathan Ball, Patrick McClure, Joeseeph Chappell, Nadine Holmes, Matthew Carlisle, Christopher Moore, Fei Sang, Johnny Debebe, Victoria Wright, Matthew Loose                                                                                                                                                                                                                                                                                                                                                                                                                                                                               |
| EPI_ISL_999033, EPI_ISL_999034, EPI_ISL_999035, EPI_ISL_999036, EPI_ISL_999037, EPI_ISL_999038, EPI_ISL_999039, EPI_ISL_999040, EPI_ISL_999041, EPI_ISL_999042, EPI_ISL_999044, EPI_ISL_999045, EPI_ISL_999048, EPI_ISL_999049, EPI_ISL_999050, EPI_ISL_999059, EPI_ISL_999060, EPI_ISL_999061, EPI_ISL_999062, EPI_ISL_999063, EPI_ISL_999064, EPI_ISL_999065, EPI_ISL_999066, EPI_ISL_999067, EPI_ISL_999076, EPI_ISL_999077, EPI_ISL_999080, EPI_ISL_999088, EPI_ISL_999094, EPI_ISL_999115, EPI_ISL_999128, EPI_ISL_999129, EPI_ISL_999133, EPI_ISL_999199, EPI_ISL_999211, EPI_ISL_999212, EPI_ISL_999364, EPI_ISL_999365, EPI_ISL_999368, EPI_ISL_999369, EPI_ISL_999370, EPI_ISL_999371, EPI_ISL_999372, EPI_ISL_999373, EPI_ISL_999377, EPI_ISL_999378, EPI_ISL_999383, EPI_ISL_999384, EPI_ISL_999388, EPI_ISL_999390, EPI_ISL_999391, EPI_ISL_999392, EPI_ISL_999393, EPI_ISL_999399, EPI_ISL_999403, EPI_ISL_999419, EPI_ISL_999420, EPI_ISL_999423, EPI_ISL_999428, EPI_ISL_999431, EPI_ISL_999432, EPI_ISL_999433, EPI_ISL_999434, EPI_ISL_999440, EPI_ISL_999446, EPI_ISL_999447, EPI_ISL_999449, EPI_ISL_999452, EPI_ISL_999455, EPI_ISL_999456, EPI_ISL_999457, EPI_ISL_999458, EPI_ISL_999460, EPI_ISL_999471, EPI_ISL_999472, EPI_ISL_999482, EPI_ISL_999512, EPI_ISL_999513, EPI_ISL_999514 |                                                                                                                                                                                                                     |                                                                            |                                                                                                                                                                                                                                                                                                                                                                                                                                                                                                                                                                                                                                                                                         |
| see above                                                                                                                                                                                                                                                                                                                                                                                                                                                                                                                                                                                                                                                                                                                                                                                                                                                                                                                                                                                                                                                                                                                                                                                                                                                                                                      | Oxford Viromics, NDM, University of Oxford: Oxford University Hospitals; Basingstoke and North Hampshire Hospital                                                                                                   | COVID-19 Genomics UK (COG-UK) Consortium                                   | Tanya Golubchik, David Bonsall, George Macintyre, Amy Trebes, Mariateresa de Cesare, Catrin Moore, Alex Mobbs, Anita Justice, Robert Shaw, Monique Andersson, Timothy Peto, Emma Wise, Nathan Moore, Jessica Lynch, Nick Cortes, Matilde Mori, Stephen Kidd, David Buck, John Todd, Christophe Fraser                                                                                                                                                                                                                                                                                                                                                                                   |
| EPI_ISL_999515                                                                                                                                                                                                                                                                                                                                                                                                                                                                                                                                                                                                                                                                                                                                                                                                                                                                                                                                                                                                                                                                                                                                                                                                                                                                                                 | Originating lab: Wales Specialist Virology Centre Sequencing lab: Pathogen Genomics Unit                                                                                                                            | Public Health Wales Microbiology Cardiff Wales Specialist Virology Centre  | Catherine Moore, Johnathan Evans, Laura Gifford, Malorie Perry, Simon Cottrell, Angela Marchbank, Alec Birchley, Alexander Adams, Amy Gaskin, Bree Gatica-Wilcox, Jason Coombes, Joel Southgate, Lauren Gilbert, Lee Graham, Nicole Pacchiarini, Sara Kumziene-Summerhayes, Sarah Taylor, Sophie Jones, Sara Rey, Matthew Bull, Joanne Watkins, Sally Corden, Tom Connor                                                                                                                                                                                                                                                                                                                |
| EPI_ISL_999985                                                                                                                                                                                                                                                                                                                                                                                                                                                                                                                                                                                                                                                                                                                                                                                                                                                                                                                                                                                                                                                                                                                                                                                                                                                                                                 | Wales Specialist Virology Centre Sequencing lab: Pathogen Genomics Unit                                                                                                                                             | Public Health Wales Microbiology Cardiff Wales Specialist Virology Centre  | Catherine Moore, Johnathan Evans, Laura Gifford, Malorie Perry, Simon Cottrell, Angela Marchbank, Alec Birchley, Alexander Adams, Amy Gaskin, Bree Gatica-Wilcox, Jason Coombes, Joel Southgate, Lauren Gilbert, Lee Graham, Nicole Pacchiarini, Sara Kumziene-Summerhayes, Sarah Taylor, Sophie Jones, Sara Rey, Matthew Bull, Joanne Watkins, Sally Corden, Tom Connor                                                                                                                                                                                                                                                                                                                |
