# Supplementary material for: Inferring the Association between the Risk of COVID-19 Case Fatality and N501Y Substitution in SARS-CoV-2
Source: MDPI journal article supplement (doi:10.3390/v13040638), 2021-04-08
Supplement: s1 [file s1]

We gratefully acknowledge the following Authors from the Originating laboratories responsible for obtaining the specimens, as well as the Submitting laboratories where the genome data were generated and shared via GISAID, on which this research is based.

All Submitters of data may be contacted directly via [www.gisaid.org](http://www.gisaid.org)

Authors are sorted alphabetically.

| Accession ID                                                                                                                                                                                                                                                                                                                                                                                                                                                                                                                                                                                                                                                                                                                                                                                                                                                                                                                                                                                                                                                                                                                                                                                                                                                                                                                                                                                                                                                                                                                                                                                                                                                                                                                                                                                                                                                                                                                                                                                                                                                                                                                                                                                                                                                                                                                                                                                                                                                                                                                                                                                                                                                                                                                                                                                                                                                                                                                                                                                                                                                                                                                                                                                                                                                                                                               | Originating Laboratory                                                                                                                                                           | Submitting Laboratory                                                                                                      | Authors                                                                                                                                                                                                                                                                                                                                                                                                                                 |                                                                                                                                                                                                                                                                                                                                                                                  |
|----------------------------------------------------------------------------------------------------------------------------------------------------------------------------------------------------------------------------------------------------------------------------------------------------------------------------------------------------------------------------------------------------------------------------------------------------------------------------------------------------------------------------------------------------------------------------------------------------------------------------------------------------------------------------------------------------------------------------------------------------------------------------------------------------------------------------------------------------------------------------------------------------------------------------------------------------------------------------------------------------------------------------------------------------------------------------------------------------------------------------------------------------------------------------------------------------------------------------------------------------------------------------------------------------------------------------------------------------------------------------------------------------------------------------------------------------------------------------------------------------------------------------------------------------------------------------------------------------------------------------------------------------------------------------------------------------------------------------------------------------------------------------------------------------------------------------------------------------------------------------------------------------------------------------------------------------------------------------------------------------------------------------------------------------------------------------------------------------------------------------------------------------------------------------------------------------------------------------------------------------------------------------------------------------------------------------------------------------------------------------------------------------------------------------------------------------------------------------------------------------------------------------------------------------------------------------------------------------------------------------------------------------------------------------------------------------------------------------------------------------------------------------------------------------------------------------------------------------------------------------------------------------------------------------------------------------------------------------------------------------------------------------------------------------------------------------------------------------------------------------------------------------------------------------------------------------------------------------------------------------------------------------------------------------------------------------|----------------------------------------------------------------------------------------------------------------------------------------------------------------------------------|----------------------------------------------------------------------------------------------------------------------------|-----------------------------------------------------------------------------------------------------------------------------------------------------------------------------------------------------------------------------------------------------------------------------------------------------------------------------------------------------------------------------------------------------------------------------------------|----------------------------------------------------------------------------------------------------------------------------------------------------------------------------------------------------------------------------------------------------------------------------------------------------------------------------------------------------------------------------------|
| EPI_ISL_1000191, EPI_ISL_1000288, EPI_ISL_1000290, EPI_ISL_1000293, EPI_ISL_1000294, EPI_ISL_1000299, EPI_ISL_1000300, EPI_ISL_1000301, EPI_ISL_1000303, EPI_ISL_1000304, EPI_ISL_1000305, EPI_ISL_1000306, EPI_ISL_1000313, EPI_ISL_1000316, EPI_ISL_1000323, EPI_ISL_1000461, EPI_ISL_1000462, EPI_ISL_1000525, EPI_ISL_1000542, EPI_ISL_1000546, EPI_ISL_1000597, EPI_ISL_1000599, EPI_ISL_1000600, EPI_ISL_1000602, EPI_ISL_1000603, EPI_ISL_1000604, EPI_ISL_1000614, EPI_ISL_1000615, EPI_ISL_1000616, EPI_ISL_1000617                                                                                                                                                                                                                                                                                                                                                                                                                                                                                                                                                                                                                                                                                                                                                                                                                                                                                                                                                                                                                                                                                                                                                                                                                                                                                                                                                                                                                                                                                                                                                                                                                                                                                                                                                                                                                                                                                                                                                                                                                                                                                                                                                                                                                                                                                                                                                                                                                                                                                                                                                                                                                                                                                                                                                                                               | see above                                                                                                                                                                        | Centre for Enzyme Innovation, University of Portsmouth / Translational Research Laboratory, Portsmouth Hospitals NHS Trust | COVID-19 Genomics UK (COG-UK) Consortium<br>Angela Beckett,Salman Goudarzi,Christopher Fearn,Kate Cook,Katie Loveson,Sharon Glaysher,Scott Elliott,Samuel Robson                                                                                                                                                                                                                                                                        |                                                                                                                                                                                                                                                                                                                                                                                  |
| EPI_ISL_1000687, EPI_ISL_1000695                                                                                                                                                                                                                                                                                                                                                                                                                                                                                                                                                                                                                                                                                                                                                                                                                                                                                                                                                                                                                                                                                                                                                                                                                                                                                                                                                                                                                                                                                                                                                                                                                                                                                                                                                                                                                                                                                                                                                                                                                                                                                                                                                                                                                                                                                                                                                                                                                                                                                                                                                                                                                                                                                                                                                                                                                                                                                                                                                                                                                                                                                                                                                                                                                                                                                           | Virology Department, Sheffield Teaching Hospitals NHS Foundation Trust/Department of Infection, Immunity and Cardiovascular Disease, The Medical School, University of Sheffield | COVID-19 Genomics UK (COG-UK) Consortium                                                                                   | Thushan de Silva, Matthew Parker, Nikki Smith, Adri Angyal, Rebecca Brown, Luke Green, Rachel Tucker, Paul Parsons, Danielle Groves, Katie Johnson, Laura Carrilero, Alex Keeley, Dave Partridge, Matthew Wyles, Benjamin Lindsey, Mehmet Yavuz, Mohammad Raza, Cariad Evans                                                                                                                                                            |                                                                                                                                                                                                                                                                                                                                                                                  |
| EPI_ISL_1000923, EPI_ISL_1000933                                                                                                                                                                                                                                                                                                                                                                                                                                                                                                                                                                                                                                                                                                                                                                                                                                                                                                                                                                                                                                                                                                                                                                                                                                                                                                                                                                                                                                                                                                                                                                                                                                                                                                                                                                                                                                                                                                                                                                                                                                                                                                                                                                                                                                                                                                                                                                                                                                                                                                                                                                                                                                                                                                                                                                                                                                                                                                                                                                                                                                                                                                                                                                                                                                                                                           | Bioinformatics and Biostatistics Lab, Advanced Sequencing Facility                                                                                                               | COVID-19 Genomics UK (COG-UK) Consortium                                                                                   | Aengus Stewart,Jerome Nicod,Chelsea Sawyer,Laura Cubitt,Harshil Patel,Margaret Crawford                                                                                                                                                                                                                                                                                                                                                 |                                                                                                                                                                                                                                                                                                                                                                                  |
| EPI_ISL_1006342, EPI_ISL_1006343, EPI_ISL_1006346, EPI_ISL_1006347, EPI_ISL_1006349, EPI_ISL_1006350, EPI_ISL_1006351, EPI_ISL_1006352, EPI_ISL_1006353, EPI_ISL_1006355, EPI_ISL_1006356, EPI_ISL_1006359, EPI_ISL_1006360, EPI_ISL_1006361, EPI_ISL_1006362, EPI_ISL_1006363, EPI_ISL_1006364, EPI_ISL_1006368, EPI_ISL_1006369, EPI_ISL_1006370, EPI_ISL_1006371, EPI_ISL_1006372, EPI_ISL_1006375, EPI_ISL_1006376, EPI_ISL_1006377, EPI_ISL_1006379, EPI_ISL_1006380, EPI_ISL_1006381, EPI_ISL_1006382, EPI_ISL_1006383, EPI_ISL_1006384, EPI_ISL_1006386, EPI_ISL_1006388, EPI_ISL_1006389, EPI_ISL_1006392, EPI_ISL_1006393, EPI_ISL_1006394, EPI_ISL_1006396, EPI_ISL_1006397, EPI_ISL_1006398, EPI_ISL_1006400, EPI_ISL_1006401, EPI_ISL_1006402, EPI_ISL_1006403, EPI_ISL_1006404, EPI_ISL_1006405, EPI_ISL_1006406, EPI_ISL_1006407, EPI_ISL_1006408, EPI_ISL_1006410, EPI_ISL_1006411, EPI_ISL_1006413, EPI_ISL_1006414, EPI_ISL_1006415, EPI_ISL_1006416, EPI_ISL_1006417, EPI_ISL_1006418, EPI_ISL_1006419, EPI_ISL_1006420, EPI_ISL_1006421, EPI_ISL_1006422, EPI_ISL_1006423, EPI_ISL_1006424, EPI_ISL_1006425, EPI_ISL_1006427, EPI_ISL_1006429, EPI_ISL_1006430, EPI_ISL_1006431, EPI_ISL_1006432, EPI_ISL_1006433, EPI_ISL_1006434, EPI_ISL_1006436, EPI_ISL_1006437, EPI_ISL_1006438, EPI_ISL_1006439, EPI_ISL_1006440, EPI_ISL_1006441, EPI_ISL_1006443, EPI_ISL_1006444, EPI_ISL_1006446, EPI_ISL_1006447, EPI_ISL_1006448, EPI_ISL_1006449, EPI_ISL_1006450, EPI_ISL_1006451, EPI_ISL_1006452, EPI_ISL_1006453, EPI_ISL_1006454, EPI_ISL_1006455, EPI_ISL_1006459, EPI_ISL_1006460, EPI_ISL_1006461, EPI_ISL_1006462, EPI_ISL_1006463, EPI_ISL_1006464, EPI_ISL_1006465, EPI_ISL_1006466, EPI_ISL_1006468, EPI_ISL_1006469, EPI_ISL_1006470, EPI_ISL_1006472, EPI_ISL_1006473, EPI_ISL_1006478, EPI_ISL_1006479, EPI_ISL_1006480, EPI_ISL_1006481, EPI_ISL_1006483, EPI_ISL_1006484, EPI_ISL_1006485, EPI_ISL_1006486, EPI_ISL_1006487, EPI_ISL_1006489, EPI_ISL_1006492, EPI_ISL_1006493, EPI_ISL_1006494, EPI_ISL_1006495, EPI_ISL_1006496, EPI_ISL_1006497, EPI_ISL_1006498, EPI_ISL_1006499, EPI_ISL_1006500, EPI_ISL_1006502, EPI_ISL_1006503, EPI_ISL_1006504, EPI_ISL_1006505, EPI_ISL_1006506, EPI_ISL_1006507, EPI_ISL_1006508, EPI_ISL_1006509, EPI_ISL_1006510, EPI_ISL_1006512, EPI_ISL_1006513, EPI_ISL_1006514, EPI_ISL_1006515, EPI_ISL_1006517, EPI_ISL_1006518, EPI_ISL_1006519, EPI_ISL_1006520, EPI_ISL_1006522, EPI_ISL_1006523, EPI_ISL_1006524, EPI_ISL_1006525, EPI_ISL_1006526, EPI_ISL_1006527, EPI_ISL_1006528, EPI_ISL_1006531, EPI_ISL_1006532, EPI_ISL_1006534, EPI_ISL_1006536, EPI_ISL_1006537, EPI_ISL_1006539                                                                                                                                                                                                                                                                                                                                                                                                                                                                                                                                                                                                                                                      | see above                                                                                                                                                                        | Lighthouse Lab in Milton Keynes                                                                                            | Wellcome Sanger Institute for the COVID-19 Genomics UK (COG-UK) Consortium                                                                                                                                                                                                                                                                                                                                                              | The Lighthouse Lab in Milton Keynes and Alex Alderton, Roberto Amato, Sonia Goncalves, Ewan Harrison, David K. Jackson, Ian Johnston, Dominic Kwiatkowski, Cordelia Langford, John Sillitoe on behalf of the Wellcome Sanger Institute COVID-19 Surveillance Team                                                                                                                |
| EPI_ISL_1007435                                                                                                                                                                                                                                                                                                                                                                                                                                                                                                                                                                                                                                                                                                                                                                                                                                                                                                                                                                                                                                                                                                                                                                                                                                                                                                                                                                                                                                                                                                                                                                                                                                                                                                                                                                                                                                                                                                                                                                                                                                                                                                                                                                                                                                                                                                                                                                                                                                                                                                                                                                                                                                                                                                                                                                                                                                                                                                                                                                                                                                                                                                                                                                                                                                                                                                            | Lighthouse Lab in Cambridge                                                                                                                                                      | Wellcome Sanger Institute for the COVID-19 Genomics UK (COG-UK) Consortium                                                 | Rob Howes, The Lighthouse Lab in Cambridge and Alex Alderton, Roberto Amato, Sonia Goncalves, Ewan Harrison, David K. Jackson, Ian Johnston, Dominic Kwiatkowski, Cordelia Langford, John Sillitoe on behalf of the Wellcome Sanger Institute COVID-19 Surveillance Team                                                                                                                                                                |                                                                                                                                                                                                                                                                                                                                                                                  |
| EPI_ISL_1012403, EPI_ISL_1012608                                                                                                                                                                                                                                                                                                                                                                                                                                                                                                                                                                                                                                                                                                                                                                                                                                                                                                                                                                                                                                                                                                                                                                                                                                                                                                                                                                                                                                                                                                                                                                                                                                                                                                                                                                                                                                                                                                                                                                                                                                                                                                                                                                                                                                                                                                                                                                                                                                                                                                                                                                                                                                                                                                                                                                                                                                                                                                                                                                                                                                                                                                                                                                                                                                                                                           | Lighthouse Lab in Milton Keynes                                                                                                                                                  | Wellcome Sanger Institute for the COVID-19 Genomics UK (COG-UK) Consortium                                                 | The Lighthouse Lab in Milton Keynes and Alex Alderton, Roberto Amato, Sonia Goncalves, Ewan Harrison, David K. Jackson, Ian Johnston, Dominic Kwiatkowski, Cordelia Langford, John Sillitoe on behalf of the Wellcome Sanger Institute COVID-19 Surveillance Team                                                                                                                                                                       |                                                                                                                                                                                                                                                                                                                                                                                  |
| EPI_ISL_1012701                                                                                                                                                                                                                                                                                                                                                                                                                                                                                                                                                                                                                                                                                                                                                                                                                                                                                                                                                                                                                                                                                                                                                                                                                                                                                                                                                                                                                                                                                                                                                                                                                                                                                                                                                                                                                                                                                                                                                                                                                                                                                                                                                                                                                                                                                                                                                                                                                                                                                                                                                                                                                                                                                                                                                                                                                                                                                                                                                                                                                                                                                                                                                                                                                                                                                                            | Lighthouse Lab in Alderley Park                                                                                                                                                  | Wellcome Sanger Institute for the COVID-19 Genomics UK (COG-UK) Consortium                                                 | Jacquelyn Wynn, Mairead Hyland, The Lighthouse Lab in Alderley Park and Alex Alderton, Roberto Amato, Sonia Goncalves, Ewan Harrison, David K. Jackson, Ian Johnston, Dominic Kwiatkowski, Cordelia Langford, John Sillitoe on behalf of the Wellcome Sanger Institute COVID-19 Surveillance Team                                                                                                                                       |                                                                                                                                                                                                                                                                                                                                                                                  |
| EPI_ISL_1045983, EPI_ISL_1046337, EPI_ISL_1046339, EPI_ISL_1046340, EPI_ISL_1046342, EPI_ISL_1046343, EPI_ISL_1046344, EPI_ISL_1046345, EPI_ISL_1046346, EPI_ISL_1046348, EPI_ISL_1046349, EPI_ISL_1046350, EPI_ISL_1046351, EPI_ISL_1046352, EPI_ISL_1046353, EPI_ISL_1046356, EPI_ISL_1046358, EPI_ISL_1046360, EPI_ISL_1046362, EPI_ISL_1046363, EPI_ISL_1046364, EPI_ISL_1046367, EPI_ISL_1046368, EPI_ISL_1046369, EPI_ISL_1046370, EPI_ISL_1046371, EPI_ISL_1046372, EPI_ISL_1046373, EPI_ISL_1046374, EPI_ISL_1046376, EPI_ISL_1046377, EPI_ISL_1046378, EPI_ISL_1046379, EPI_ISL_1046380, EPI_ISL_1046382, EPI_ISL_1046383, EPI_ISL_1046384, EPI_ISL_1046385, EPI_ISL_1046386, EPI_ISL_1046387, EPI_ISL_1046388, EPI_ISL_1046389, EPI_ISL_1046390, EPI_ISL_1046391, EPI_ISL_1046392, EPI_ISL_1046393, EPI_ISL_1046395, EPI_ISL_1046397, EPI_ISL_1046398, EPI_ISL_1046399, EPI_ISL_1046400, EPI_ISL_1046401, EPI_ISL_1046403, EPI_ISL_1046405, EPI_ISL_1046406, EPI_ISL_1046407, EPI_ISL_1046408, EPI_ISL_1046410, EPI_ISL_1046412, EPI_ISL_1046413, EPI_ISL_1046414, EPI_ISL_1046415, EPI_ISL_1046416, EPI_ISL_1046417, EPI_ISL_1046418, EPI_ISL_1046419, EPI_ISL_1046420, EPI_ISL_1046421, EPI_ISL_1046422, EPI_ISL_1046423, EPI_ISL_1046424, EPI_ISL_1046425, EPI_ISL_1046426, EPI_ISL_1046427, EPI_ISL_1046428, EPI_ISL_1046429, EPI_ISL_1046430, EPI_ISL_1046431, EPI_ISL_1046432, EPI_ISL_1046433, EPI_ISL_1046434, EPI_ISL_1046436, EPI_ISL_1046437, EPI_ISL_1046438, EPI_ISL_1046439, EPI_ISL_1046441, EPI_ISL_1046443, EPI_ISL_1046444, EPI_ISL_1046445, EPI_ISL_1046446, EPI_ISL_1046447, EPI_ISL_1046448, EPI_ISL_1046450, EPI_ISL_1046451, EPI_ISL_1046452, EPI_ISL_1046453, EPI_ISL_1046454, EPI_ISL_1046455, EPI_ISL_1046456, EPI_ISL_1046457, EPI_ISL_1046458, EPI_ISL_1046459, EPI_ISL_1046460, EPI_ISL_1046461, EPI_ISL_1046462, EPI_ISL_1046463, EPI_ISL_1046464, EPI_ISL_1046465, EPI_ISL_1046466, EPI_ISL_1046468, EPI_ISL_1046469, EPI_ISL_1046470, EPI_ISL_1046471, EPI_ISL_1046472, EPI_ISL_1046473, EPI_ISL_1046475, EPI_ISL_1046476, EPI_ISL_1046477, EPI_ISL_1046478, EPI_ISL_1046479, EPI_ISL_1046480, EPI_ISL_1046481, EPI_ISL_1046482, EPI_ISL_1046483, EPI_ISL_1046484, EPI_ISL_1046485, EPI_ISL_1046486, EPI_ISL_1046487, EPI_ISL_1046488, EPI_ISL_1046489, EPI_ISL_1046490, EPI_ISL_1046492, EPI_ISL_1046493, EPI_ISL_1046494, EPI_ISL_1046496, EPI_ISL_1046497, EPI_ISL_1046498, EPI_ISL_1046499, EPI_ISL_1046500, EPI_ISL_1046501, EPI_ISL_1046502, EPI_ISL_1046503, EPI_ISL_1046505, EPI_ISL_1046506, EPI_ISL_1046509, EPI_ISL_1046511, EPI_ISL_1046512, EPI_ISL_1046540, EPI_ISL_1046543, EPI_ISL_1046545, EPI_ISL_1046555, EPI_ISL_1046576, EPI_ISL_1046579, EPI_ISL_1046589, EPI_ISL_1046591, EPI_ISL_1046600, EPI_ISL_1046608, EPI_ISL_1046610, EPI_ISL_1046613, EPI_ISL_1046616, EPI_ISL_1046617, EPI_ISL_1046621, EPI_ISL_1046625, EPI_ISL_1046627, EPI_ISL_1046630, EPI_ISL_1046634, EPI_ISL_1046637, EPI_ISL_1046678, EPI_ISL_1046681, EPI_ISL_1046684, EPI_ISL_1046686, EPI_ISL_1046690, EPI_ISL_1046692, EPI_ISL_1046697, EPI_ISL_1046699, EPI_ISL_1046702, EPI_ISL_1046705, EPI_ISL_1046713, EPI_ISL_1046716, EPI_ISL_1046721, EPI_ISL_1046729, EPI_ISL_1046731, EPI_ISL_1046732, EPI_ISL_1046738, EPI_ISL_1046739, EPI_ISL_1046745, EPI_ISL_1046753, EPI_ISL_1046757 | see above                                                                                                                                                                        | Randox Laboratories                                                                                                        | Wellcome Sanger Institute for the COVID-19 Genomics UK (COG-UK) Consortium                                                                                                                                                                                                                                                                                                                                                              | Randox Laboratories and Alex Alderton, Roberto Amato, Jeffrey Barrett, Sonia Goncalves, Ewan Harrison, David K. Jackson, Ian Johnston, Dominic Kwiatkowski, Cordelia Langford, John Sillitoe on behalf of the Wellcome Sanger Institute COVID-19 Surveillance Team                                                                                                               |
| EPI_ISL_1047000, EPI_ISL_1047002, EPI_ISL_1047003, EPI_ISL_1047006, EPI_ISL_1047010, EPI_ISL_1047013, EPI_ISL_1047031, EPI_ISL_1047038                                                                                                                                                                                                                                                                                                                                                                                                                                                                                                                                                                                                                                                                                                                                                                                                                                                                                                                                                                                                                                                                                                                                                                                                                                                                                                                                                                                                                                                                                                                                                                                                                                                                                                                                                                                                                                                                                                                                                                                                                                                                                                                                                                                                                                                                                                                                                                                                                                                                                                                                                                                                                                                                                                                                                                                                                                                                                                                                                                                                                                                                                                                                                                                     | University of Birmingham                                                                                                                                                         | COVID-19 Genomics UK (COG-UK) Consortium                                                                                   | Institute of Microbiology, University of Birmingham: Claire McMurray, Joanne Stockton, Samuel Nicholls, Radoslaw Poplawski, Will Rowe, Josh Quick, Nicholas Loman. University of Birmingham Testing Laboratory: Celina M Whalley, Andrew Bosworth, Charlotte Poxon, Kasun Wanigasooriya, Oliver Pickles, Mike Kidd, Alex Richter, Andrew D Beggs PHE Heartlands Lab: Husam Osman, Andrew Bosworth. Queen Elizabeth Hospital: Anna Casey |                                                                                                                                                                                                                                                                                                                                                                                  |
| EPI_ISL_1047188, EPI_ISL_1047189, EPI_ISL_1047192, EPI_ISL_1047193, EPI_ISL_1047349, EPI_ISL_1047350, EPI_ISL_1047351, EPI_ISL_1047353, EPI_ISL_1047354                                                                                                                                                                                                                                                                                                                                                                                                                                                                                                                                                                                                                                                                                                                                                                                                                                                                                                                                                                                                                                                                                                                                                                                                                                                                                                                                                                                                                                                                                                                                                                                                                                                                                                                                                                                                                                                                                                                                                                                                                                                                                                                                                                                                                                                                                                                                                                                                                                                                                                                                                                                                                                                                                                                                                                                                                                                                                                                                                                                                                                                                                                                                                                    | Department of Pathology, University of Cambridge                                                                                                                                 | COVID-19 Genomics UK (COG-UK) Consortium                                                                                   | Aminu S. Jahun, Yasmin Chaudhry, Iliana Georgana, Myra Hosmillo, Rhys Izuagbe, William L. Hamilton, Martin D. Curran, Surendra Parmar, Ian Goodfellow                                                                                                                                                                                                                                                                                   |                                                                                                                                                                                                                                                                                                                                                                                  |
| EPI_ISL_1047582, EPI_ISL_1047644, EPI_ISL_1047645, EPI_ISL_1047646, EPI_ISL_1047754, EPI_ISL_1047781, EPI_ISL_1047784, EPI_ISL_1047803                                                                                                                                                                                                                                                                                                                                                                                                                                                                                                                                                                                                                                                                                                                                                                                                                                                                                                                                                                                                                                                                                                                                                                                                                                                                                                                                                                                                                                                                                                                                                                                                                                                                                                                                                                                                                                                                                                                                                                                                                                                                                                                                                                                                                                                                                                                                                                                                                                                                                                                                                                                                                                                                                                                                                                                                                                                                                                                                                                                                                                                                                                                                                                                     | Virology Department, Sheffield Teaching Hospitals NHS Foundation Trust/Department of Infection, Immunity and Cardiovascular Disease, The Medical School, University of Sheffield | COVID-19 Genomics UK (COG-UK) Consortium                                                                                   | Thushan de Silva, Matthew Parker, Nikki Smith, Adri Angyal, Rebecca Brown, Luke Green, Rachel Tucker, Paul Parsons, Danielle Groves, Katie Johnson, Laura Carrilero, Alex Keeley, Dave Partridge, Matthew Wyles, Benjamin Lindsey, Mehmet Yavuz, Mohammad Raza, Cariad Evans                                                                                                                                                            |                                                                                                                                                                                                                                                                                                                                                                                  |
| EPI_ISL_1047804, EPI_ISL_1047805, EPI_ISL_1047806, EPI_ISL_1047807, EPI_ISL_1047808, EPI_ISL_1047809, EPI_ISL_1047810, EPI_ISL_1047811, EPI_ISL_1047812, EPI_ISL_1047813, EPI_ISL_1047814, EPI_ISL_1047815, EPI_ISL_1047816, EPI_ISL_1047817, EPI_ISL_1047818, EPI_ISL_1047819, EPI_ISL_1047820, EPI_ISL_1047821, EPI_ISL_1047823, EPI_ISL_1047824, EPI_ISL_1047833                                                                                                                                                                                                                                                                                                                                                                                                                                                                                                                                                                                                                                                                                                                                                                                                                                                                                                                                                                                                                                                                                                                                                                                                                                                                                                                                                                                                                                                                                                                                                                                                                                                                                                                                                                                                                                                                                                                                                                                                                                                                                                                                                                                                                                                                                                                                                                                                                                                                                                                                                                                                                                                                                                                                                                                                                                                                                                                                                        | see above                                                                                                                                                                        | West of Scotland Specialist Virology Centre, NHSGGC / MRC-University of Glasgow Centre for Virus Research                  | COVID-19 Genomics UK (COG-UK) Consortium                                                                                                                                                                                                                                                                                                                                                                                                | Ana da Silva Filipe, Natasha Johnson, Kathy Smollett, Daniel Mair, Stephen Carmichael, Alice Broos, Lily Tong, Jenna Nichols, Kyriaki Nomikou; Sarah McDonald; Richard Orton, Joseph Hughes, Sreenu Vattipally, David L Robertson; Alasdair MacLean, Rory Gunson; Sharif Shaaban, Matthew Holden; Rachel Blacow, Guy Mollett, Kathy Li, James Shepherd, Antonia Ho, Emma Thomson |
| EPI_ISL_1047861, EPI_ISL_1047862, EPI_ISL_1047863, EPI_ISL_1047864, EPI_ISL_1047865                                                                                                                                                                                                                                                                                                                                                                                                                                                                                                                                                                                                                                                                                                                                                                                                                                                                                                                                                                                                                                                                                                                                                                                                                                                                                                                                                                                                                                                                                                                                                                                                                                                                                                                                                                                                                                                                                                                                                                                                                                                                                                                                                                                                                                                                                                                                                                                                                                                                                                                                                                                                                                                                                                                                                                                                                                                                                                                                                                                                                                                                                                                                                                                                                                        | Virology Department, Royal Infirmary of Edinburgh, NHS Lothian / School of Biological Sciences, University of Edinburgh                                                          | COVID-19 Genomics UK (COG-UK) Consortium                                                                                   | McHugh M, Dewar R, Cotton S, Rooke S, O'Toole Á, Scher E, Hill V, McCrone JT, Colquhoun R, Yu X, Jackson B, Rambaut A, Templeton K                                                                                                                                                                                                                                                                                                      |                                                                                                                                                                                                                                                                                                                                                                                  |
| EPI_ISL_1047969, EPI_ISL_1048027                                                                                                                                                                                                                                                                                                                                                                                                                                                                                                                                                                                                                                                                                                                                                                                                                                                                                                                                                                                                                                                                                                                                                                                                                                                                                                                                                                                                                                                                                                                                                                                                                                                                                                                                                                                                                                                                                                                                                                                                                                                                                                                                                                                                                                                                                                                                                                                                                                                                                                                                                                                                                                                                                                                                                                                                                                                                                                                                                                                                                                                                                                                                                                                                                                                                                           | Liverpool Clinical Laboratories                                                                                                                                                  | COVID-19 Genomics UK (COG-UK) Consortium                                                                                   | Sam Haldenby, Anita Lucaci, Steve Paterson, Julian Hiscox, Alistair Darby, M Almsaud, A Alrezaihi, Muhannad Alruwaili, Stuart D Armstrong, Jones Benjamin, Eleanor G Bentley, Anu Chawla, Jordan J Clark, Angela Cowell, Richard Eccles, Isabel Garcia-Dorival, Matthew Gemmell, Alessandro Gerada,                                                                                                                                     |                                                                                                                                                                                                                                                                                                                                                                                  |

|                                                                                                                                                                                                                                                                                                                                                                                                                                                                                                                                                                                                                                                                                                                                                                                                                                                                                                                                                                                        |                                                                                                                                                                                                                     |                                          |                                                                                                                                                                                                                                                                                                                                                                                  |
|----------------------------------------------------------------------------------------------------------------------------------------------------------------------------------------------------------------------------------------------------------------------------------------------------------------------------------------------------------------------------------------------------------------------------------------------------------------------------------------------------------------------------------------------------------------------------------------------------------------------------------------------------------------------------------------------------------------------------------------------------------------------------------------------------------------------------------------------------------------------------------------------------------------------------------------------------------------------------------------|---------------------------------------------------------------------------------------------------------------------------------------------------------------------------------------------------------------------|------------------------------------------|----------------------------------------------------------------------------------------------------------------------------------------------------------------------------------------------------------------------------------------------------------------------------------------------------------------------------------------------------------------------------------|
| PKF Gilmore, Richard Gregory, Ximeng Han, Catherine Hartley, Margaret Hughes, Miren Iturriza-Gomara, James Johnson, L Luu, Jenifer Manson, Charlotte Nelson, Elaine O'Toole, Cassie Olateju, Rebekah Penrice-Randal , Lucille Rainbow, N.P Randle, Trevor Ian Robinson, Parul Sharma, Ghada T Shawli, James P Stewart, Neil Swainston, Ecaterina Varnos, Joanne Watts, Mark Whitehead                                                                                                                                                                                                                                                                                                                                                                                                                                                                                                                                                                                                  |                                                                                                                                                                                                                     |                                          |                                                                                                                                                                                                                                                                                                                                                                                  |
| EPI_ISL_1048060, EPI_ISL_1048063, EPI_ISL_1048064, EPI_ISL_1048080, EPI_ISL_1048082, EPI_ISL_1048084, EPI_ISL_1048104, EPI_ISL_1048135                                                                                                                                                                                                                                                                                                                                                                                                                                                                                                                                                                                                                                                                                                                                                                                                                                                 | Barts Health NHS Trust                                                                                                                                                                                              | COVID-19 Genomics UK (COG-UK) Consortium | CUTINO-MOGUEL, Maria-Teresa; HARRINGTON, David; OWOYEMI, Dola; KULASEGARAN-SHYLINI, Raghavendran; BROAD, Claire; KELE, Beatrix                                                                                                                                                                                                                                                   |
| EPI_ISL_1050066                                                                                                                                                                                                                                                                                                                                                                                                                                                                                                                                                                                                                                                                                                                                                                                                                                                                                                                                                                        | Virology Department, Sheffield Teaching Hospitals NHS Foundation Trust/Department of Infection, Immunity and Cardiovascular Disease, The Medical School, University of Sheffield                                    | COVID-19 Genomics UK (COG-UK) Consortium | Thushan de Silva, Matthew Parker, Nikki Smith, Adri Angyal, Rebecca Brown, Luke Green, Rachel Tucker, Paul Parsons, Danielle Groves, Katie Johnson, Laura Carrilero, Alex Keeley, Dave Partridge, Matthew Wyles, Benjamin Lindsey, Mehmet Yavuz, Mohammad Raza, Cariad Evans                                                                                                     |
| EPI_ISL_1050219, EPI_ISL_1050220, EPI_ISL_1050222                                                                                                                                                                                                                                                                                                                                                                                                                                                                                                                                                                                                                                                                                                                                                                                                                                                                                                                                      | West of Scotland Specialist Virology Centre, NHSGGC / MRC-University of Glasgow Centre for Virus Research                                                                                                           | COVID-19 Genomics UK (COG-UK) Consortium | Ana da Silva Filipe, Natasha Johnson, Kathy Smollett, Daniel Mair, Stephen Carmichael, Alice Broos, Lily Tong, Jenna Nichols, Kyriaki Nomikou; Sarah McDonald; Richard Orton, Joseph Hughes, Sreenu Vattipally, David L Robertson; Alasdair MacLean, Rory Gunson; Sharif Shaaban, Matthew Holden; Rachel Blacow, Guy Mollett, Kathy Li, James Shepherd, Antonia Ho, Emma Thomson |
| EPI_ISL_1050293, EPI_ISL_1050294, EPI_ISL_1050295, EPI_ISL_1050300, EPI_ISL_1050301, EPI_ISL_1050302, EPI_ISL_1050303                                                                                                                                                                                                                                                                                                                                                                                                                                                                                                                                                                                                                                                                                                                                                                                                                                                                  | University of Exeter                                                                                                                                                                                                | COVID-19 Genomics UK (COG-UK) Consortium | Ben Temperton,Aaron Jeffries,Michelle Michelsen,Joanna Warwick-Dugdale,Audrey Farbos,Robyn Manley,Stephen Michell,Jane Masoli                                                                                                                                                                                                                                                    |
| EPI_ISL_1050582, EPI_ISL_1050583, EPI_ISL_1050584, EPI_ISL_1050585, EPI_ISL_1050586, EPI_ISL_1050587, EPI_ISL_1050588, EPI_ISL_1050589, EPI_ISL_1050590, EPI_ISL_1050591, EPI_ISL_1050592, EPI_ISL_1050593, EPI_ISL_1050594, EPI_ISL_1050595, EPI_ISL_1050596, EPI_ISL_1050597, EPI_ISL_1050598, EPI_ISL_1050599, EPI_ISL_1050600, EPI_ISL_1050601, EPI_ISL_1050602, EPI_ISL_1050603, EPI_ISL_1050604                                                                                                                                                                                                                                                                                                                                                                                                                                                                                                                                                                                  |                                                                                                                                                                                                                     |                                          |                                                                                                                                                                                                                                                                                                                                                                                  |
| see above                                                                                                                                                                                                                                                                                                                                                                                                                                                                                                                                                                                                                                                                                                                                                                                                                                                                                                                                                                              | University College London, Great Ormond Street Hospital for Children NHS Foundation Trust, Imperial College Healthcare NHS Trust                                                                                    | COVID-19 Genomics UK (COG-UK) Consortium | Sergi Castellano, Rachel Williams, Mark Kristiansen, Paola Resende Silva, Sunando Roy, Tony Brooks, Helena Tutill, Paola Niola, Patricia Dyal, Charlotte Williams, Leysa Forrest, Yasmin Panchbhaya, Jacqueline Findlay, Samuel Weeks, Julianne Brown, Kathryn Harris, Paul Randell, James Price, Alison Holmes, Judith Breuer                                                   |
| EPI_ISL_1050605, EPI_ISL_1050606                                                                                                                                                                                                                                                                                                                                                                                                                                                                                                                                                                                                                                                                                                                                                                                                                                                                                                                                                       | Department of Pathology, University of Cambridge                                                                                                                                                                    | COVID-19 Genomics UK (COG-UK) Consortium | Aminu S. Jahun, Yasmin Chaudhry, Iliana Georgana, Myra Hosmillo, Rhys Izuagbe, William L. Hamilton, Martin D. Curran, Surendra Parmar, Ian Goodfellow                                                                                                                                                                                                                            |
| EPI_ISL_1050607, EPI_ISL_1050608, EPI_ISL_1050609                                                                                                                                                                                                                                                                                                                                                                                                                                                                                                                                                                                                                                                                                                                                                                                                                                                                                                                                      | University College London, Great Ormond Street Hospital for Children NHS Foundation Trust, Imperial College Healthcare NHS Trust                                                                                    | COVID-19 Genomics UK (COG-UK) Consortium | Sergi Castellano, Rachel Williams, Mark Kristiansen, Paola Resende Silva, Sunando Roy, Tony Brooks, Helena Tutill, Paola Niola, Patricia Dyal, Charlotte Williams, Leysa Forrest, Yasmin Panchbhaya, Jacqueline Findlay, Samuel Weeks, Julianne Brown, Kathryn Harris, Paul Randell, James Price, Alison Holmes, Judith Breuer                                                   |
| EPI_ISL_1050610                                                                                                                                                                                                                                                                                                                                                                                                                                                                                                                                                                                                                                                                                                                                                                                                                                                                                                                                                                        | Department of Pathology, University of Cambridge                                                                                                                                                                    | COVID-19 Genomics UK (COG-UK) Consortium | Aminu S. Jahun, Yasmin Chaudhry, Iliana Georgana, Myra Hosmillo, Rhys Izuagbe, William L. Hamilton, Martin D. Curran, Surendra Parmar, Ian Goodfellow                                                                                                                                                                                                                            |
| EPI_ISL_1050611, EPI_ISL_1050612, EPI_ISL_1050613                                                                                                                                                                                                                                                                                                                                                                                                                                                                                                                                                                                                                                                                                                                                                                                                                                                                                                                                      | University College London, Great Ormond Street Hospital for Children NHS Foundation Trust, Imperial College Healthcare NHS Trust                                                                                    | COVID-19 Genomics UK (COG-UK) Consortium | Sergi Castellano, Rachel Williams, Mark Kristiansen, Paola Resende Silva, Sunando Roy, Tony Brooks, Helena Tutill, Paola Niola, Patricia Dyal, Charlotte Williams, Leysa Forrest, Yasmin Panchbhaya, Jacqueline Findlay, Samuel Weeks, Julianne Brown, Kathryn Harris, Paul Randell, James Price, Alison Holmes, Judith Breuer                                                   |
| EPI_ISL_1050614                                                                                                                                                                                                                                                                                                                                                                                                                                                                                                                                                                                                                                                                                                                                                                                                                                                                                                                                                                        | Department of Pathology, University of Cambridge                                                                                                                                                                    | COVID-19 Genomics UK (COG-UK) Consortium | Aminu S. Jahun, Yasmin Chaudhry, Iliana Georgana, Myra Hosmillo, Rhys Izuagbe, William L. Hamilton, Martin D. Curran, Surendra Parmar, Ian Goodfellow                                                                                                                                                                                                                            |
| EPI_ISL_1050615, EPI_ISL_1050616, EPI_ISL_1050617, EPI_ISL_1050618                                                                                                                                                                                                                                                                                                                                                                                                                                                                                                                                                                                                                                                                                                                                                                                                                                                                                                                     | University College London, Great Ormond Street Hospital for Children NHS Foundation Trust, Imperial College Healthcare NHS Trust                                                                                    | COVID-19 Genomics UK (COG-UK) Consortium | Sergi Castellano, Rachel Williams, Mark Kristiansen, Paola Resende Silva, Sunando Roy, Tony Brooks, Helena Tutill, Paola Niola, Patricia Dyal, Charlotte Williams, Leysa Forrest, Yasmin Panchbhaya, Jacqueline Findlay, Samuel Weeks, Julianne Brown, Kathryn Harris, Paul Randell, James Price, Alison Holmes, Judith Breuer                                                   |
| EPI_ISL_1050619                                                                                                                                                                                                                                                                                                                                                                                                                                                                                                                                                                                                                                                                                                                                                                                                                                                                                                                                                                        | Department of Pathology, University of Cambridge                                                                                                                                                                    | COVID-19 Genomics UK (COG-UK) Consortium | Aminu S. Jahun, Yasmin Chaudhry, Iliana Georgana, Myra Hosmillo, Rhys Izuagbe, William L. Hamilton, Martin D. Curran, Surendra Parmar, Ian Goodfellow                                                                                                                                                                                                                            |
| EPI_ISL_1050620, EPI_ISL_1050621, EPI_ISL_1050622, EPI_ISL_1050623, EPI_ISL_1050624, EPI_ISL_1050625, EPI_ISL_1050626, EPI_ISL_1050627, EPI_ISL_1050628, EPI_ISL_1050629, EPI_ISL_1050630, EPI_ISL_1050631                                                                                                                                                                                                                                                                                                                                                                                                                                                                                                                                                                                                                                                                                                                                                                             |                                                                                                                                                                                                                     |                                          |                                                                                                                                                                                                                                                                                                                                                                                  |
| see above                                                                                                                                                                                                                                                                                                                                                                                                                                                                                                                                                                                                                                                                                                                                                                                                                                                                                                                                                                              | University College London, Great Ormond Street Hospital for Children NHS Foundation Trust, Imperial College Healthcare NHS Trust                                                                                    | COVID-19 Genomics UK (COG-UK) Consortium | Sergi Castellano, Rachel Williams, Mark Kristiansen, Paola Resende Silva, Sunando Roy, Tony Brooks, Helena Tutill, Paola Niola, Patricia Dyal, Charlotte Williams, Leysa Forrest, Yasmin Panchbhaya, Jacqueline Findlay, Samuel Weeks, Julianne Brown, Kathryn Harris, Paul Randell, James Price, Alison Holmes, Judith Breuer                                                   |
| EPI_ISL_1050632, EPI_ISL_1050633, EPI_ISL_1050634, EPI_ISL_1050635, EPI_ISL_1050636, EPI_ISL_1050637, EPI_ISL_1050638, EPI_ISL_1050639, EPI_ISL_1050640, EPI_ISL_1050641, EPI_ISL_1050642, EPI_ISL_1050643, EPI_ISL_1050644, EPI_ISL_1050645, EPI_ISL_1050646, EPI_ISL_1050647, EPI_ISL_1050648, EPI_ISL_1050649, EPI_ISL_1050651, EPI_ISL_1050652, EPI_ISL_1050653, EPI_ISL_1050654, EPI_ISL_1050655, EPI_ISL_1050656, EPI_ISL_1050657, EPI_ISL_1050658, EPI_ISL_1050659, EPI_ISL_1050660, EPI_ISL_1050661, EPI_ISL_1050662, EPI_ISL_1050663, EPI_ISL_1050664, EPI_ISL_1050665, EPI_ISL_1050666, EPI_ISL_1050667, EPI_ISL_1050668, EPI_ISL_1050669, EPI_ISL_1050670, EPI_ISL_1050671, EPI_ISL_1050672, EPI_ISL_1050673, EPI_ISL_1050674, EPI_ISL_1050675                                                                                                                                                                                                                              |                                                                                                                                                                                                                     |                                          |                                                                                                                                                                                                                                                                                                                                                                                  |
| see above                                                                                                                                                                                                                                                                                                                                                                                                                                                                                                                                                                                                                                                                                                                                                                                                                                                                                                                                                                              | Department of Pathology, University of Cambridge                                                                                                                                                                    | COVID-19 Genomics UK (COG-UK) Consortium | Aminu S. Jahun, Yasmin Chaudhry, Iliana Georgana, Myra Hosmillo, Rhys Izuagbe, William L. Hamilton, Martin D. Curran, Surendra Parmar, Ian Goodfellow                                                                                                                                                                                                                            |
| EPI_ISL_1050676, EPI_ISL_1050677, EPI_ISL_1050678, EPI_ISL_1050679, EPI_ISL_1050680, EPI_ISL_1050681, EPI_ISL_1050682, EPI_ISL_1050683, EPI_ISL_1050684                                                                                                                                                                                                                                                                                                                                                                                                                                                                                                                                                                                                                                                                                                                                                                                                                                | University College London, Great Ormond Street Hospital for Children NHS Foundation Trust, Imperial College Healthcare NHS Trust                                                                                    | COVID-19 Genomics UK (COG-UK) Consortium | Sergi Castellano, Rachel Williams, Mark Kristiansen, Paola Resende Silva, Sunando Roy, Tony Brooks, Helena Tutill, Paola Niola, Patricia Dyal, Charlotte Williams, Leysa Forrest, Yasmin Panchbhaya, Jacqueline Findlay, Samuel Weeks, Julianne Brown, Kathryn Harris, Paul Randell, James Price, Alison Holmes, Judith Breuer                                                   |
| EPI_ISL_1050685, EPI_ISL_1050686, EPI_ISL_1050687, EPI_ISL_1050688, EPI_ISL_1050689, EPI_ISL_1050690, EPI_ISL_1050692, EPI_ISL_1050693, EPI_ISL_1050694, EPI_ISL_1050695, EPI_ISL_1050696, EPI_ISL_1050698, EPI_ISL_1050699, EPI_ISL_1050700, EPI_ISL_1050701, EPI_ISL_1050702, EPI_ISL_1050705, EPI_ISL_1050706, EPI_ISL_1050707, EPI_ISL_1050708, EPI_ISL_1050709, EPI_ISL_1050710, EPI_ISL_1050711, EPI_ISL_1050712, EPI_ISL_1050713, EPI_ISL_1050714, EPI_ISL_1050715, EPI_ISL_1050716, EPI_ISL_1050717, EPI_ISL_1050718, EPI_ISL_1050719, EPI_ISL_1050720, EPI_ISL_1050721, EPI_ISL_1050722                                                                                                                                                                                                                                                                                                                                                                                       |                                                                                                                                                                                                                     |                                          |                                                                                                                                                                                                                                                                                                                                                                                  |
| see above                                                                                                                                                                                                                                                                                                                                                                                                                                                                                                                                                                                                                                                                                                                                                                                                                                                                                                                                                                              | Department of Pathology, University of Cambridge                                                                                                                                                                    | COVID-19 Genomics UK (COG-UK) Consortium | Aminu S. Jahun, Yasmin Chaudhry, Iliana Georgana, Myra Hosmillo, Rhys Izuagbe, William L. Hamilton, Martin D. Curran, Surendra Parmar, Ian Goodfellow                                                                                                                                                                                                                            |
| EPI_ISL_1050723, EPI_ISL_1050724, EPI_ISL_1050725, EPI_ISL_1050726, EPI_ISL_1050727, EPI_ISL_1050728, EPI_ISL_1050729, EPI_ISL_1050730, EPI_ISL_1050731, EPI_ISL_1050732, EPI_ISL_1050733, EPI_ISL_1050734, EPI_ISL_1050735, EPI_ISL_1050736, EPI_ISL_1050737, EPI_ISL_1050738, EPI_ISL_1050739, EPI_ISL_1050740, EPI_ISL_1050741, EPI_ISL_1050742, EPI_ISL_1050743, EPI_ISL_1050744, EPI_ISL_1050745, EPI_ISL_1050746, EPI_ISL_1050747                                                                                                                                                                                                                                                                                                                                                                                                                                                                                                                                                |                                                                                                                                                                                                                     |                                          |                                                                                                                                                                                                                                                                                                                                                                                  |
| see above                                                                                                                                                                                                                                                                                                                                                                                                                                                                                                                                                                                                                                                                                                                                                                                                                                                                                                                                                                              | University College London, Great Ormond Street Hospital for Children NHS Foundation Trust, Imperial College Healthcare NHS Trust                                                                                    | COVID-19 Genomics UK (COG-UK) Consortium | Sergi Castellano, Rachel Williams, Mark Kristiansen, Paola Resende Silva, Sunando Roy, Tony Brooks, Helena Tutill, Paola Niola, Patricia Dyal, Charlotte Williams, Leysa Forrest, Yasmin Panchbhaya, Jacqueline Findlay, Samuel Weeks, Julianne Brown, Kathryn Harris, Paul Randell, James Price, Alison Holmes, Judith Breuer                                                   |
| EPI_ISL_1051244, EPI_ISL_1051245, EPI_ISL_1051246, EPI_ISL_1051247, EPI_ISL_1051248, EPI_ISL_1051249, EPI_ISL_1051250, EPI_ISL_1051251, EPI_ISL_1051252, EPI_ISL_1051253, EPI_ISL_1051254, EPI_ISL_1051255, EPI_ISL_1051256, EPI_ISL_1051257, EPI_ISL_1051258, EPI_ISL_1051259, EPI_ISL_1051260                                                                                                                                                                                                                                                                                                                                                                                                                                                                                                                                                                                                                                                                                        |                                                                                                                                                                                                                     |                                          |                                                                                                                                                                                                                                                                                                                                                                                  |
| see above                                                                                                                                                                                                                                                                                                                                                                                                                                                                                                                                                                                                                                                                                                                                                                                                                                                                                                                                                                              | Northumbria University / South Tees Hospitals NHS Foundation Trust / North Cumbria Integrated Care NHS Foundation Trust / North Tees and Hartlepool NHS Foundation Trust / Newcastle Hospitals NHS Foundation Trust | COVID-19 Genomics UK (COG-UK) Consortium | Darren L Smith,Andrew Nelson,Matthew Bashton,Greg R Young,Joshua Loh,John Allan,Mohammad A Tariq,Giles S Holt,Gary Black,Wen C Yew,Lynn Dover,Paul Baker,Steve Liggett,Sarah Essex,Jane Greenaway,Debra Padgett,Clive Graham,Garren Scott,Edward Barton,Emma Swindells,Brendan Payne,Jennifer Collins,Yusri Taha,Gary Eltringham                                                 |
| EPI_ISL_1051590                                                                                                                                                                                                                                                                                                                                                                                                                                                                                                                                                                                                                                                                                                                                                                                                                                                                                                                                                                        | Queens Medical Centre, Clinical Microbiology Department / DeepSeq Nottingham                                                                                                                                        | COVID-19 Genomics UK (COG-UK) Consortium | Gemma Clark, Wendy Smith, Manjinder Khakh, Vicki M Fleming, Michelle M Lister, Hannah Howson-Wells, Jonathan Ball, Patrick McClure, Joseph Chappell, Theocharis Tsoleridis, Nadine Holmes, Matthew Carlisle, Christopher Moore, Fei Sang, Johnny Debebe, Victoria Wright, Matthew Loose                                                                                          |
| EPI_ISL_1051596, EPI_ISL_1051627, EPI_ISL_1051630, EPI_ISL_1051631, EPI_ISL_1051634, EPI_ISL_1051635, EPI_ISL_1051645, EPI_ISL_1051647, EPI_ISL_1051652, EPI_ISL_1051653, EPI_ISL_1051654, EPI_ISL_1051658, EPI_ISL_1051659, EPI_ISL_1051661, EPI_ISL_1051662, EPI_ISL_1051663, EPI_ISL_1051664, EPI_ISL_1051667, EPI_ISL_1051668, EPI_ISL_1051669, EPI_ISL_1051672, EPI_ISL_1051674, EPI_ISL_1051677, EPI_ISL_1051678, EPI_ISL_1051679, EPI_ISL_1051680, EPI_ISL_1051683, EPI_ISL_1051684, EPI_ISL_1051686, EPI_ISL_1051687, EPI_ISL_1051689, EPI_ISL_1051691, EPI_ISL_1051693, EPI_ISL_1051715, EPI_ISL_1051716, EPI_ISL_1051717, EPI_ISL_1051718, EPI_ISL_1051719, EPI_ISL_1051721, EPI_ISL_1051722, EPI_ISL_1051726, EPI_ISL_1051728, EPI_ISL_1051877, EPI_ISL_1051878, EPI_ISL_1051881, EPI_ISL_1051882, EPI_ISL_1051883, EPI_ISL_1051884, EPI_ISL_1051899, EPI_ISL_1051903, EPI_ISL_1051908, EPI_ISL_1051909, EPI_ISL_1051910, EPI_ISL_1051911, EPI_ISL_1051914, EPI_ISL_1051918 |                                                                                                                                                                                                                     |                                          |                                                                                                                                                                                                                                                                                                                                                                                  |

|                                                                                                                                                                                                                                                                                                                                                                                                                                                                                                                                                                                                                                                                                                                                                                                                                                                                                                                                                                                                                                                                                                                                                                                                                                      |                                                                                                                                                                                                                     |                                                                           |                                                                                                                                                                                                                                                                                                                                                                                                                                                                                                                                                                                                                                                                                          |
|--------------------------------------------------------------------------------------------------------------------------------------------------------------------------------------------------------------------------------------------------------------------------------------------------------------------------------------------------------------------------------------------------------------------------------------------------------------------------------------------------------------------------------------------------------------------------------------------------------------------------------------------------------------------------------------------------------------------------------------------------------------------------------------------------------------------------------------------------------------------------------------------------------------------------------------------------------------------------------------------------------------------------------------------------------------------------------------------------------------------------------------------------------------------------------------------------------------------------------------|---------------------------------------------------------------------------------------------------------------------------------------------------------------------------------------------------------------------|---------------------------------------------------------------------------|------------------------------------------------------------------------------------------------------------------------------------------------------------------------------------------------------------------------------------------------------------------------------------------------------------------------------------------------------------------------------------------------------------------------------------------------------------------------------------------------------------------------------------------------------------------------------------------------------------------------------------------------------------------------------------------|
| see above                                                                                                                                                                                                                                                                                                                                                                                                                                                                                                                                                                                                                                                                                                                                                                                                                                                                                                                                                                                                                                                                                                                                                                                                                            | Oxford Viromics, NDM, University of Oxford; Oxford University Hospitals; Basingstoke and North Hampshire Hospital                                                                                                   | COVID-19 Genomics UK (COG-UK) Consortium                                  | Tanya Golubchik, David Bonsall, George Macintyre, Amy Trebes, Mariateresa de Cesare, Catrin Moore, Alex Mobbs, Anita Justice, Robert Shaw, Monique Andersson, Timothy Peto, Emma Wise, Nathan Moore, Jessica Lynch, Nick Cortes, Matilde Mori, Stephen Kidd, David Buck, John Todd, Christophe Fraser                                                                                                                                                                                                                                                                                                                                                                                    |
| EPI_ISL_1052138, EPI_ISL_1052143, EPI_ISL_1052145, EPI_ISL_1052146, EPI_ISL_1052150, EPI_ISL_1052261, EPI_ISL_1052262, EPI_ISL_1052263, EPI_ISL_1052470, EPI_ISL_1052530, EPI_ISL_1053513, EPI_ISL_1053515, EPI_ISL_1053516, EPI_ISL_1053530, EPI_ISL_1053531, EPI_ISL_1053539, EPI_ISL_1053540, EPI_ISL_1053562, EPI_ISL_1053565, EPI_ISL_1053567, EPI_ISL_1053568, EPI_ISL_1053569, EPI_ISL_1053571, EPI_ISL_1053572, EPI_ISL_1053573, EPI_ISL_1053574, EPI_ISL_1053575                                                                                                                                                                                                                                                                                                                                                                                                                                                                                                                                                                                                                                                                                                                                                            |                                                                                                                                                                                                                     |                                                                           |                                                                                                                                                                                                                                                                                                                                                                                                                                                                                                                                                                                                                                                                                          |
| see above                                                                                                                                                                                                                                                                                                                                                                                                                                                                                                                                                                                                                                                                                                                                                                                                                                                                                                                                                                                                                                                                                                                                                                                                                            | Originating lab: Wales Specialist Virology Centre Sequencing lab: Pathogen Genomics Unit                                                                                                                            | Public Health Wales Microbiology Cardiff Wales Specialist Virology Centre | Catherine Moore, Johnathan Evans, Laura Gifford, Malorie Perry, Simon Cottrell, Angela Marchbank, Alec Birchley, Alexander Adams, Amy Gaskin, Bree Gatica-Wilcox, Jason Coombes, Joel Southgate, Lauren Gilbert, Lee Graham, Nicole Pacchiarini, Sara Kumziene-Summerhayes, Sarah Taylor, Sophie Jones, Sara Rey, Matthew Bull, Joanne Watkins, Sally Corden, Tom Connor                                                                                                                                                                                                                                                                                                                 |
| EPI_ISL_1053851, EPI_ISL_1053852, EPI_ISL_1053856, EPI_ISL_1053857, EPI_ISL_1053932                                                                                                                                                                                                                                                                                                                                                                                                                                                                                                                                                                                                                                                                                                                                                                                                                                                                                                                                                                                                                                                                                                                                                  | Centre for Enzyme Innovation, University of Portsmouth / Translational Research Laboratory, Portsmouth Hospitals NHS Trust                                                                                          | COVID-19 Genomics UK (COG-UK) Consortium                                  | Angela Beckett, Salman Goudarzi, Christopher Fearn, Kate Cook, Katie Loveson, Sharon Glaysher, Scott Elliott, Samuel Robson                                                                                                                                                                                                                                                                                                                                                                                                                                                                                                                                                              |
| EPI_ISL_1054051, EPI_ISL_1054121, EPI_ISL_1054123, EPI_ISL_1054127                                                                                                                                                                                                                                                                                                                                                                                                                                                                                                                                                                                                                                                                                                                                                                                                                                                                                                                                                                                                                                                                                                                                                                   | University of Exeter                                                                                                                                                                                                | COVID-19 Genomics UK (COG-UK) Consortium                                  | Ben Temperton, Aaron Jeffries, Michelle Michelsen, Joanna Warwick-Dugdale, Audrey Farbos, Robyn Manley, Stephen Michell, Jane Masoli                                                                                                                                                                                                                                                                                                                                                                                                                                                                                                                                                     |
| EPI_ISL_1054141, EPI_ISL_1054233, EPI_ISL_1054241, EPI_ISL_1054250, EPI_ISL_1054254                                                                                                                                                                                                                                                                                                                                                                                                                                                                                                                                                                                                                                                                                                                                                                                                                                                                                                                                                                                                                                                                                                                                                  | Northumbria University / South Tees Hospitals NHS Foundation Trust / North Cumbria Integrated Care NHS Foundation Trust / North Tees and Hartlepool NHS Foundation Trust / Newcastle Hospitals NHS Foundation Trust | COVID-19 Genomics UK (COG-UK) Consortium                                  | Darren L Smith, Andrew Nelson, Matthew Bashton, Greg R Young, Joshua Loh, John Allan, Mohammad A Tariq, Giles S Holt, Gary Black, Wen C Yew, Lynn Dover, Paul Baker, Steve Liggett, Sarah Essex, Jane Greenaway, Debra Padgett, Clive Graham, Garren Scott, Edward Barton, Emma Swindells, Brendan Payne, Jennifer Collins, Yusri Taha, Gary Eltringham                                                                                                                                                                                                                                                                                                                                  |
| EPI_ISL_1054391, EPI_ISL_1054392, EPI_ISL_1054393, EPI_ISL_1054394, EPI_ISL_1054395, EPI_ISL_1054397, EPI_ISL_1054398, EPI_ISL_1054399, EPI_ISL_1054400, EPI_ISL_1054401, EPI_ISL_1054402, EPI_ISL_1054403, EPI_ISL_1054411, EPI_ISL_1054412, EPI_ISL_1054413, EPI_ISL_1054414, EPI_ISL_1054415, EPI_ISL_1054416, EPI_ISL_1054420, EPI_ISL_1054421, EPI_ISL_1054422, EPI_ISL_1054423, EPI_ISL_1054424, EPI_ISL_1054425, EPI_ISL_1054426, EPI_ISL_1054427, EPI_ISL_1054428, EPI_ISL_1054432, EPI_ISL_1054433, EPI_ISL_1054434, EPI_ISL_1054435, EPI_ISL_1054436, EPI_ISL_1054437, EPI_ISL_1054444, EPI_ISL_1054445, EPI_ISL_1054446, EPI_ISL_1054451, EPI_ISL_1054452, EPI_ISL_1054453, EPI_ISL_1054454, EPI_ISL_1054455, EPI_ISL_1054456, EPI_ISL_1054459, EPI_ISL_1054460                                                                                                                                                                                                                                                                                                                                                                                                                                                           |                                                                                                                                                                                                                     |                                                                           |                                                                                                                                                                                                                                                                                                                                                                                                                                                                                                                                                                                                                                                                                          |
| see above                                                                                                                                                                                                                                                                                                                                                                                                                                                                                                                                                                                                                                                                                                                                                                                                                                                                                                                                                                                                                                                                                                                                                                                                                            | Queens Medical Centre, Clinical Microbiology Department / DeepSeq Nottingham                                                                                                                                        | COVID-19 Genomics UK (COG-UK) Consortium                                  | Gemma Clark, Wendy Smith, Manjinder Khakh, Vicki M Fleming, Michelle M Lister, Hannah Howson-Wells, Jonathan Ball, Patrick McClure, Joseph Chappell, Theocharis Tsoleridis, Nadine Holmes, Matthew Carlisle, Christopher Moore, Fei Sang, Johnny Debebe, Victoria Wright, Matthew Loose                                                                                                                                                                                                                                                                                                                                                                                                  |
| EPI_ISL_1054462, EPI_ISL_1054463, EPI_ISL_1054464, EPI_ISL_1054465, EPI_ISL_1054466, EPI_ISL_1054467, EPI_ISL_1054469, EPI_ISL_1054470, EPI_ISL_1054472, EPI_ISL_1054473, EPI_ISL_1054474, EPI_ISL_1054475, EPI_ISL_1054476, EPI_ISL_1054477, EPI_ISL_1054478, EPI_ISL_1054479, EPI_ISL_1054480, EPI_ISL_1054481, EPI_ISL_1054482, EPI_ISL_1054483, EPI_ISL_1054484, EPI_ISL_1054485, EPI_ISL_1054486, EPI_ISL_1054487, EPI_ISL_1054488, EPI_ISL_1054489, EPI_ISL_1054490, EPI_ISL_1054491, EPI_ISL_1054492, EPI_ISL_1054493, EPI_ISL_1054494, EPI_ISL_1054495, EPI_ISL_1054496, EPI_ISL_1054497, EPI_ISL_1054498, EPI_ISL_1054499, EPI_ISL_1054500, EPI_ISL_1054501, EPI_ISL_1054502, EPI_ISL_1054503, EPI_ISL_1054504, EPI_ISL_1054505, EPI_ISL_1054506, EPI_ISL_1054510, EPI_ISL_1054511, EPI_ISL_1054512, EPI_ISL_1054513, EPI_ISL_1054514, EPI_ISL_1054515, EPI_ISL_1054516, EPI_ISL_1054517, EPI_ISL_1054518, EPI_ISL_1054521, EPI_ISL_1054528, EPI_ISL_1054529, EPI_ISL_1054530, EPI_ISL_1054532, EPI_ISL_1054533, EPI_ISL_1054534, EPI_ISL_1054535, EPI_ISL_1054536, EPI_ISL_1054537, EPI_ISL_1054538, EPI_ISL_1054539, EPI_ISL_1054540, EPI_ISL_1054541                                                                     |                                                                                                                                                                                                                     |                                                                           |                                                                                                                                                                                                                                                                                                                                                                                                                                                                                                                                                                                                                                                                                          |
| see above                                                                                                                                                                                                                                                                                                                                                                                                                                                                                                                                                                                                                                                                                                                                                                                                                                                                                                                                                                                                                                                                                                                                                                                                                            | University of Exeter                                                                                                                                                                                                | COVID-19 Genomics UK (COG-UK) Consortium                                  | Ben Temperton, Aaron Jeffries, Michelle Michelsen, Joanna Warwick-Dugdale, Audrey Farbos, Robyn Manley, Stephen Michell, Jane Masoli                                                                                                                                                                                                                                                                                                                                                                                                                                                                                                                                                     |
| EPI_ISL_1054826, EPI_ISL_1054827, EPI_ISL_1054828, EPI_ISL_1054829, EPI_ISL_1054831                                                                                                                                                                                                                                                                                                                                                                                                                                                                                                                                                                                                                                                                                                                                                                                                                                                                                                                                                                                                                                                                                                                                                  | Bioinformatics and Biostatistics Lab, Advanced Sequencing Facility                                                                                                                                                  | COVID-19 Genomics UK (COG-UK) Consortium                                  | Aengus Stewart, Jerome Nicod, Chelsea Sawyer, Laura Cubitt, Harshil Patel, Margaret Crawford                                                                                                                                                                                                                                                                                                                                                                                                                                                                                                                                                                                             |
| EPI_ISL_1103757                                                                                                                                                                                                                                                                                                                                                                                                                                                                                                                                                                                                                                                                                                                                                                                                                                                                                                                                                                                                                                                                                                                                                                                                                      | University of Exeter                                                                                                                                                                                                | COVID-19 Genomics UK (COG-UK) Consortium                                  | Ben Temperton, Aaron Jeffries, Michelle Michelsen, Joanna Warwick-Dugdale, Audrey Farbos, Robyn Manley, Stephen Michell, Jane Masoli                                                                                                                                                                                                                                                                                                                                                                                                                                                                                                                                                     |
| EPI_ISL_1103884, EPI_ISL_1103888, EPI_ISL_1103890, EPI_ISL_1103945                                                                                                                                                                                                                                                                                                                                                                                                                                                                                                                                                                                                                                                                                                                                                                                                                                                                                                                                                                                                                                                                                                                                                                   | Department of Pathology, University of Cambridge                                                                                                                                                                    | COVID-19 Genomics UK (COG-UK) Consortium                                  | Aminu S. Jahun, Yasmin Chaudhry, Iliana Georgana, Myra Hosmillo, Rhys Izuagbe, William L. Hamilton, Martin D. Curran, Surendra Parmar, Ian Goodfellow                                                                                                                                                                                                                                                                                                                                                                                                                                                                                                                                    |
| EPI_ISL_1103949, EPI_ISL_1103950, EPI_ISL_1103951, EPI_ISL_1103952, EPI_ISL_1103965, EPI_ISL_1103966, EPI_ISL_1103967, EPI_ISL_1103968, EPI_ISL_1103969, EPI_ISL_1103970, EPI_ISL_1103971, EPI_ISL_1103972, EPI_ISL_1103973, EPI_ISL_1103974, EPI_ISL_1103975, EPI_ISL_1103976, EPI_ISL_1103977, EPI_ISL_1103978, EPI_ISL_1103979, EPI_ISL_1103980, EPI_ISL_1103981, EPI_ISL_1103982, EPI_ISL_1103983, EPI_ISL_1103984, EPI_ISL_1103985, EPI_ISL_1103986, EPI_ISL_1103987, EPI_ISL_1103988, EPI_ISL_1103989, EPI_ISL_1103990, EPI_ISL_1103991, EPI_ISL_1103992, EPI_ISL_1103993, EPI_ISL_1103994, EPI_ISL_1103995, EPI_ISL_1103996, EPI_ISL_1104000, EPI_ISL_1104001, EPI_ISL_1104002, EPI_ISL_1104003, EPI_ISL_1104004, EPI_ISL_1104014, EPI_ISL_1104015, EPI_ISL_1104016, EPI_ISL_1104017, EPI_ISL_1104018, EPI_ISL_1104019, EPI_ISL_1104020, EPI_ISL_1104021, EPI_ISL_1104022, EPI_ISL_1104023, EPI_ISL_1104024                                                                                                                                                                                                                                                                                                                   |                                                                                                                                                                                                                     |                                                                           |                                                                                                                                                                                                                                                                                                                                                                                                                                                                                                                                                                                                                                                                                          |
| see above                                                                                                                                                                                                                                                                                                                                                                                                                                                                                                                                                                                                                                                                                                                                                                                                                                                                                                                                                                                                                                                                                                                                                                                                                            | Northumbria University / South Tees Hospitals NHS Foundation Trust / North Cumbria Integrated Care NHS Foundation Trust / North Tees and Hartlepool NHS Foundation Trust / Newcastle Hospitals NHS Foundation Trust | COVID-19 Genomics UK (COG-UK) Consortium                                  | Darren L Smith, Andrew Nelson, Matthew Bashton, Greg R Young, Joshua Loh, John Allan, Mohammad A Tariq, Giles S Holt, Gary Black, Wen C Yew, Lynn Dover, Paul Baker, Steve Liggett, Sarah Essex, Jane Greenaway, Debra Padgett, Clive Graham, Garren Scott, Edward Barton, Emma Swindells, Brendan Payne, Jennifer Collins, Yusri Taha, Gary Eltringham                                                                                                                                                                                                                                                                                                                                  |
| EPI_ISL_1104025, EPI_ISL_1104026, EPI_ISL_1104027, EPI_ISL_1104028, EPI_ISL_1104030, EPI_ISL_1104031, EPI_ISL_1104032, EPI_ISL_1104033, EPI_ISL_1104034, EPI_ISL_1104035, EPI_ISL_1104036, EPI_ISL_1104037, EPI_ISL_1104038, EPI_ISL_1104039, EPI_ISL_1104040, EPI_ISL_1104049, EPI_ISL_1104050, EPI_ISL_1104071                                                                                                                                                                                                                                                                                                                                                                                                                                                                                                                                                                                                                                                                                                                                                                                                                                                                                                                     |                                                                                                                                                                                                                     |                                                                           |                                                                                                                                                                                                                                                                                                                                                                                                                                                                                                                                                                                                                                                                                          |
| see above                                                                                                                                                                                                                                                                                                                                                                                                                                                                                                                                                                                                                                                                                                                                                                                                                                                                                                                                                                                                                                                                                                                                                                                                                            | Virology Department, Sheffield Teaching Hospitals NHS Foundation Trust/Department of Infection, Immunity and Cardiovascular Disease, The Medical School, University of Sheffield                                    | COVID-19 Genomics UK (COG-UK) Consortium                                  | Thushan de Silva, Matthew Parker, Nikki Smith, Adri Angyal, Rebecca Brown, Luke Green, Rachel Tucker, Paul Parsons, Danielle Groves, Katie Johnson, Laura Carrilero, Alex Keeley, Dave Partridge, Matthew Wyles, Benjamin Lindsey, Mehmet Yavuz, Mohammad Raza, Cariad Evans                                                                                                                                                                                                                                                                                                                                                                                                             |
| EPI_ISL_1104500, EPI_ISL_1104501, EPI_ISL_1104505                                                                                                                                                                                                                                                                                                                                                                                                                                                                                                                                                                                                                                                                                                                                                                                                                                                                                                                                                                                                                                                                                                                                                                                    | Liverpool Clinical Laboratories                                                                                                                                                                                     | COVID-19 Genomics UK (COG-UK) Consortium                                  | Sam Haldenby, Anita Lucaci, Steve Paterson, Julian Hiscox, Alistair Darby, M Almsaud, A Alrezaihi, Muhannad Alruwaili, Stuart D Armstrong, Jones Benjamin, Eleanor G Bentley, Anu Chawla, Jordan J Clark, Angela Cowell, Richard Eccles, Isabel Garcia-Dorival, Matthew Gemmell, Alessandro Gerada, PKF Gilmore, Richard Gregory, Ximeng Han, Catherine Hartley, Margaret Hughes, Miren Iturriza-Gomara, James Johnson, L Luu, Jennifer Manson, Charlotte Nelson, Elaine O'Toole, Cassie Olatelu, Rebekah Penrice-Randal, Lucille Rainbow, N.P Randle, Trevor Ian Robinson, Parul Sharma, Ghada T Shawli, James P Stewart, Neil Swainston, Ecaterina Vamos, Joanne Watts, Mark Whitehead |
| EPI_ISL_1104832, EPI_ISL_1104836, EPI_ISL_1104838, EPI_ISL_1104843, EPI_ISL_1104844, EPI_ISL_1104847, EPI_ISL_1104848, EPI_ISL_1104849, EPI_ISL_1104855, EPI_ISL_1104856, EPI_ISL_1104857, EPI_ISL_1104859, EPI_ISL_1104863, EPI_ISL_1104864, EPI_ISL_1104867, EPI_ISL_1104872, EPI_ISL_1104874, EPI_ISL_1104879, EPI_ISL_1104880, EPI_ISL_1104881, EPI_ISL_1104886, EPI_ISL_1104887, EPI_ISL_1104900, EPI_ISL_1104901, EPI_ISL_1104902, EPI_ISL_1104908, EPI_ISL_1104910, EPI_ISL_1104916, EPI_ISL_1104917, EPI_ISL_1104918, EPI_ISL_1104919, EPI_ISL_1104920, EPI_ISL_1104925, EPI_ISL_1104934, EPI_ISL_1104940, EPI_ISL_1104945, EPI_ISL_1104955, EPI_ISL_1104961, EPI_ISL_1104967, EPI_ISL_1105182, EPI_ISL_1105191, EPI_ISL_1105192, EPI_ISL_1105194, EPI_ISL_1105198, EPI_ISL_1105225, EPI_ISL_1105227                                                                                                                                                                                                                                                                                                                                                                                                                         |                                                                                                                                                                                                                     |                                                                           |                                                                                                                                                                                                                                                                                                                                                                                                                                                                                                                                                                                                                                                                                          |
| see above                                                                                                                                                                                                                                                                                                                                                                                                                                                                                                                                                                                                                                                                                                                                                                                                                                                                                                                                                                                                                                                                                                                                                                                                                            | University College London Hospital                                                                                                                                                                                  | COVID-19 Genomics UK (COG-UK) Consortium                                  | Judith Heaney, Matthew Byott, Catherine Houlihan, Dan Frampton, Stuart Kirk, Moira Spyer and Eleni Nastouli                                                                                                                                                                                                                                                                                                                                                                                                                                                                                                                                                                              |
| EPI_ISL_1105467                                                                                                                                                                                                                                                                                                                                                                                                                                                                                                                                                                                                                                                                                                                                                                                                                                                                                                                                                                                                                                                                                                                                                                                                                      | University College London, Great Ormond Street Hospital for Children NHS Foundation Trust, Imperial College Healthcare NHS Trust                                                                                    | COVID-19 Genomics UK (COG-UK) Consortium                                  | Sergi Castellano, Rachel Williams, Mark Kristiansen, Paola Resende Silva, Sunando Roy, Tony Brooks, Helena Tutill, Paola Niola, Patricia Dyal, Charlotte Williams, Leysa Forrest, Yasmin Panchbhaya, Jacqueline Findlay, Samuel Weeks, Julianne Brown, Kathryn Harris, Paul Randell, James Price, Alison Holmes, Judith Breuer                                                                                                                                                                                                                                                                                                                                                           |
| EPI_ISL_1105861, EPI_ISL_1105862, EPI_ISL_1105863, EPI_ISL_1105864, EPI_ISL_1105865, EPI_ISL_1105866, EPI_ISL_1105867, EPI_ISL_1105868, EPI_ISL_1105869, EPI_ISL_1105870, EPI_ISL_1105883, EPI_ISL_1105884, EPI_ISL_1105885, EPI_ISL_1105886, EPI_ISL_1105887, EPI_ISL_1105888                                                                                                                                                                                                                                                                                                                                                                                                                                                                                                                                                                                                                                                                                                                                                                                                                                                                                                                                                       |                                                                                                                                                                                                                     |                                                                           |                                                                                                                                                                                                                                                                                                                                                                                                                                                                                                                                                                                                                                                                                          |
| see above                                                                                                                                                                                                                                                                                                                                                                                                                                                                                                                                                                                                                                                                                                                                                                                                                                                                                                                                                                                                                                                                                                                                                                                                                            | Lincolnshire Hospitals and DeepSeq Nottingham                                                                                                                                                                       | COVID-19 Genomics UK (COG-UK) Consortium                                  | Nichola Duckworth, Tim Sloan, Sarah Walsh, Jonathan Ball, Patrick McClure, Joeseeph Chappell, Nadine Holmes, Matthew Carlisle, Christopher Moore, Fei Sang, Johnny Debebe, Victoria Wright, Matthew Loose                                                                                                                                                                                                                                                                                                                                                                                                                                                                                |
| EPI_ISL_1106646, EPI_ISL_1106647                                                                                                                                                                                                                                                                                                                                                                                                                                                                                                                                                                                                                                                                                                                                                                                                                                                                                                                                                                                                                                                                                                                                                                                                     | Originating lab: Wales Specialist Virology Centre Sequencing lab: Pathogen Genomics Unit                                                                                                                            | Public Health Wales Microbiology Cardiff Wales Specialist Virology Centre | Catherine Moore, Johnathan Evans, Laura Gifford, Malorie Perry, Simon Cottrell, Angela Marchbank, Alec Birchley, Alexander Adams, Amy Gaskin, Bree Gatica-Wilcox, Jason Coombes, Joel Southgate, Lauren Gilbert, Lee Graham, Nicole Pacchiarini, Sara Kumziene-Summerhayes, Sarah Taylor, Sophie Jones, Sara Rey, Matthew Bull, Joanne Watkins, Sally Corden, Tom Connor                                                                                                                                                                                                                                                                                                                 |
| EPI_ISL_1107632, EPI_ISL_1107655, EPI_ISL_1107656, EPI_ISL_1107657, EPI_ISL_1107658, EPI_ISL_1107659, EPI_ISL_1107660, EPI_ISL_1107661, EPI_ISL_1107662                                                                                                                                                                                                                                                                                                                                                                                                                                                                                                                                                                                                                                                                                                                                                                                                                                                                                                                                                                                                                                                                              | Centre for Enzyme Innovation, University of Portsmouth / Translational Research Laboratory, Portsmouth Hospitals NHS Trust                                                                                          | COVID-19 Genomics UK (COG-UK) Consortium                                  | Angela Beckett, Salman Goudarzi, Christopher Fearn, Kate Cook, Katie Loveson, Sharon Glaysher, Scott Elliott, Samuel Robson                                                                                                                                                                                                                                                                                                                                                                                                                                                                                                                                                              |
| EPI_ISL_1108957, EPI_ISL_1108960, EPI_ISL_1108961, EPI_ISL_1108962, EPI_ISL_1108963, EPI_ISL_1108964, EPI_ISL_1108965, EPI_ISL_1108966, EPI_ISL_1108967, EPI_ISL_1108968, EPI_ISL_1108969, EPI_ISL_1108971, EPI_ISL_1108973, EPI_ISL_1108974, EPI_ISL_1108975, EPI_ISL_1108976, EPI_ISL_1108977, EPI_ISL_1108978, EPI_ISL_1108979, EPI_ISL_1108980, EPI_ISL_1108981, EPI_ISL_1108982, EPI_ISL_1108984, EPI_ISL_1108985, EPI_ISL_1108986, EPI_ISL_1108987, EPI_ISL_1108988, EPI_ISL_1108989, EPI_ISL_1108990, EPI_ISL_1108991, EPI_ISL_1108992, EPI_ISL_1108993, EPI_ISL_1108994, EPI_ISL_1108995, EPI_ISL_1108996, EPI_ISL_1108997, EPI_ISL_1108998, EPI_ISL_1108999, EPI_ISL_1109000, EPI_ISL_1109001, EPI_ISL_1109002, EPI_ISL_1109003, EPI_ISL_1109004, EPI_ISL_1109005, EPI_ISL_1109006, EPI_ISL_1109007, EPI_ISL_1109008, EPI_ISL_1109009, EPI_ISL_1109010, EPI_ISL_1109011, EPI_ISL_1109012, EPI_ISL_1109014, EPI_ISL_1109015, EPI_ISL_1109016, EPI_ISL_1109017, EPI_ISL_1109018, EPI_ISL_1109019, EPI_ISL_1109020, EPI_ISL_1109021, EPI_ISL_1109022, EPI_ISL_1109023, EPI_ISL_1109026, EPI_ISL_1109028, EPI_ISL_1109030, EPI_ISL_1109032, EPI_ISL_1109035, EPI_ISL_1109037, EPI_ISL_1109042, EPI_ISL_1109043, EPI_ISL_1109044 |                                                                                                                                                                                                                     |                                                                           |                                                                                                                                                                                                                                                                                                                                                                                                                                                                                                                                                                                                                                                                                          |

|                                                                                                                                                                                                                                                                                                                                                                                                                                                                                                                                                                                                                                                                                                                                                                                                                                                                                                                                                                                                                                                                                                                                                                                                                                                                                                                                                                                                                                                                                                                                                                                                                                                                                                                                                                                                                                                                                                                                                                                                                                                                                                                                                                                                                              |                                                                                                                                                                                                                     |                                                  |                                                                                                                                                                                                                                                                                                                                                                                                                                                                                                                                                                                                                                                                                                            |                                                                                                                                                                                                                                                                                           |
|------------------------------------------------------------------------------------------------------------------------------------------------------------------------------------------------------------------------------------------------------------------------------------------------------------------------------------------------------------------------------------------------------------------------------------------------------------------------------------------------------------------------------------------------------------------------------------------------------------------------------------------------------------------------------------------------------------------------------------------------------------------------------------------------------------------------------------------------------------------------------------------------------------------------------------------------------------------------------------------------------------------------------------------------------------------------------------------------------------------------------------------------------------------------------------------------------------------------------------------------------------------------------------------------------------------------------------------------------------------------------------------------------------------------------------------------------------------------------------------------------------------------------------------------------------------------------------------------------------------------------------------------------------------------------------------------------------------------------------------------------------------------------------------------------------------------------------------------------------------------------------------------------------------------------------------------------------------------------------------------------------------------------------------------------------------------------------------------------------------------------------------------------------------------------------------------------------------------------|---------------------------------------------------------------------------------------------------------------------------------------------------------------------------------------------------------------------|--------------------------------------------------|------------------------------------------------------------------------------------------------------------------------------------------------------------------------------------------------------------------------------------------------------------------------------------------------------------------------------------------------------------------------------------------------------------------------------------------------------------------------------------------------------------------------------------------------------------------------------------------------------------------------------------------------------------------------------------------------------------|-------------------------------------------------------------------------------------------------------------------------------------------------------------------------------------------------------------------------------------------------------------------------------------------|
| see above                                                                                                                                                                                                                                                                                                                                                                                                                                                                                                                                                                                                                                                                                                                                                                                                                                                                                                                                                                                                                                                                                                                                                                                                                                                                                                                                                                                                                                                                                                                                                                                                                                                                                                                                                                                                                                                                                                                                                                                                                                                                                                                                                                                                                    | Queens Medical Centre, Clinical Microbiology Department / DeepSeq Nottingham                                                                                                                                        | COVID-19 Genomics UK (COG-UK) Consortium         | Gemma Clark, Wendy Smith, Manjinder Khakh, Vicki M Fleming, Michelle M Lister, Hannah Howson-Wells, Jonathan Ball, Patrick McClure, Joseph Chappell, Theocharis Tsoleridis, Nadine Holmes, Matthew Carlisle, Christopher Moore, Fei Sang, Johnny Debebe, Victoria Wright, Matthew Loose                                                                                                                                                                                                                                                                                                                                                                                                                    |                                                                                                                                                                                                                                                                                           |
| EPI_ISL_1177709, EPI_ISL_1177710, EPI_ISL_1177720, EPI_ISL_1177721                                                                                                                                                                                                                                                                                                                                                                                                                                                                                                                                                                                                                                                                                                                                                                                                                                                                                                                                                                                                                                                                                                                                                                                                                                                                                                                                                                                                                                                                                                                                                                                                                                                                                                                                                                                                                                                                                                                                                                                                                                                                                                                                                           | Virology Department, Royal Infirmary of Edinburgh, NHS Lothian / School of Biological Sciences, University of Edinburgh                                                                                             | COVID-19 Genomics UK (COG-UK) Consortium         | McHugh M, Dewar R, Cotton S, Rooke S, O'Toole Á, Scher E, Hill V, McCrone JT, Colquhoun R, Yu X, Jackson B, Rambaut A, Templeton K                                                                                                                                                                                                                                                                                                                                                                                                                                                                                                                                                                         |                                                                                                                                                                                                                                                                                           |
| EPI_ISL_1177891, EPI_ISL_1177892                                                                                                                                                                                                                                                                                                                                                                                                                                                                                                                                                                                                                                                                                                                                                                                                                                                                                                                                                                                                                                                                                                                                                                                                                                                                                                                                                                                                                                                                                                                                                                                                                                                                                                                                                                                                                                                                                                                                                                                                                                                                                                                                                                                             | Liverpool Clinical Laboratories                                                                                                                                                                                     | COVID-19 Genomics UK (COG-UK) Consortium         | Sam Haldenby, Alistair Darby, Steve Paterson, Anita Lucaci, Julian Hiscox, M Almsaud, A Alrezaihi, Muhannad Alruwaili, Stuart D Armstrong, Jones Benjamin, Eleanor G Bentley, Anu Chawla, Jordan J Clark, Angela Cowell, Richard Eccles, Isabel Garcia-Dorival, Matthew Gemmell, Alessandro Gerada, PKF Gilmore, Richard Gregory, Ximeng Han, Catherine Hartley, Margaret Hughes, Miren Iturriza-Gomara, James Johnson, L Luu, Jenifer Manson, Charlotte Nelson, Elaine O'Toole, Cassie Olateju, Rebekah Penrice-Randal , Lucille Rainbow, N.P Randle, Trevor Ian Robinson, Parul Sharma, Ghada T Shawli, James P Stewart, Neil Swainston, Ecaterina Vamos, Joanne Watts, Mark Whitehead, Hermione Webster |                                                                                                                                                                                                                                                                                           |
| EPI_ISL_1178148, EPI_ISL_1178149                                                                                                                                                                                                                                                                                                                                                                                                                                                                                                                                                                                                                                                                                                                                                                                                                                                                                                                                                                                                                                                                                                                                                                                                                                                                                                                                                                                                                                                                                                                                                                                                                                                                                                                                                                                                                                                                                                                                                                                                                                                                                                                                                                                             | Northumbria University / South Tees Hospitals NHS Foundation Trust / North Cumbria Integrated Care NHS Foundation Trust / North Tees and Hartlepool NHS Foundation Trust / Newcastle Hospitals NHS Foundation Trust | COVID-19 Genomics UK (COG-UK) Consortium         | Darren L Smith,Andrew Nelson,Matthew Bashton,Greg R Young,Joshua Loh,John Allan,Mohammad A Tariq,Giles S Holt,Gary Black,Wen C Yew,Lynn Dover,Paul Baker,Steve Liggett,Sarah Essex,Jane Greenaway,Debra Padgett,Clive Graham,Garren Scott,Edward Barton,Emma Swindells,Brendan Payne,Jennifer Collins,Yusri Taha,Gary Eltringham                                                                                                                                                                                                                                                                                                                                                                           |                                                                                                                                                                                                                                                                                           |
| EPI_ISL_1178433, EPI_ISL_1178434, EPI_ISL_1178436, EPI_ISL_1178437, EPI_ISL_1178444, EPI_ISL_1178448, EPI_ISL_1178450, EPI_ISL_1178451                                                                                                                                                                                                                                                                                                                                                                                                                                                                                                                                                                                                                                                                                                                                                                                                                                                                                                                                                                                                                                                                                                                                                                                                                                                                                                                                                                                                                                                                                                                                                                                                                                                                                                                                                                                                                                                                                                                                                                                                                                                                                       | see above                                                                                                                                                                                                           | COVID-19 Genomics UK (COG-UK) Consortium         | Dave J. Baker, Gemma L. Kay, Alp Aydin, Thanh Le-Viet, Steven Rudder, Ana P. Tedim, Anastasia Kolyva, Maria Diaz, Leonardo de Oliveira Martins, Nabil-Fareed Alikhan, Lizzie Meadows, Rachael Stanley, Ngozi Elumogo, Muhammed Yasir, Nicholas M. Thomson, Alexander J Trotter, Rachel Gilroy, Samuel Bloomfield, Claire Stuart, Andrew Bell, Reenesh Prakash, Samir Dervisevic, Alison E. Mather, John Wain, Mark Webber, Andrew J. Page, Justin O'Grady                                                                                                                                                                                                                                                  |                                                                                                                                                                                                                                                                                           |
| EPI_ISL_1178854                                                                                                                                                                                                                                                                                                                                                                                                                                                                                                                                                                                                                                                                                                                                                                                                                                                                                                                                                                                                                                                                                                                                                                                                                                                                                                                                                                                                                                                                                                                                                                                                                                                                                                                                                                                                                                                                                                                                                                                                                                                                                                                                                                                                              | Oxford Viromics, NDM, University of Oxford; Oxford University Hospitals; Basingstoke and North Hampshire Hospital                                                                                                   | COVID-19 Genomics UK (COG-UK) Consortium         | Tanya Golubchik, David Bonsall, George Macintyre, Amy Trebes, Mariateresa de Cesare, Catrin Moore, Alex Mobbs, Anita Justice, Robert Shaw, Monique Andersson, Timothy Peto, Emma Wise, Nathan Moore, Jessica Lynch, Nick Cortes, Matilde Mori, Stephen Kidd, David Buck, John Todd, Christophe Fraser                                                                                                                                                                                                                                                                                                                                                                                                      |                                                                                                                                                                                                                                                                                           |
| EPI_ISL_1179828, EPI_ISL_1179829                                                                                                                                                                                                                                                                                                                                                                                                                                                                                                                                                                                                                                                                                                                                                                                                                                                                                                                                                                                                                                                                                                                                                                                                                                                                                                                                                                                                                                                                                                                                                                                                                                                                                                                                                                                                                                                                                                                                                                                                                                                                                                                                                                                             | Centre for Enzyme Innovation, University of Portsmouth / Translational Research Laboratory, Portsmouth Hospitals NHS Trust                                                                                          | COVID-19 Genomics UK (COG-UK) Consortium         | Angela Beckett,Salman Goudarzi,Christopher Fearn,Kate Cook,Katie Loveson,Sharon Glaysher,Scott Elliott,Samuel Robson                                                                                                                                                                                                                                                                                                                                                                                                                                                                                                                                                                                       |                                                                                                                                                                                                                                                                                           |
| EPI_ISL_1179891, EPI_ISL_1179892, EPI_ISL_1179893, EPI_ISL_1179894, EPI_ISL_1179895, EPI_ISL_1179896, EPI_ISL_1179897, EPI_ISL_1179898, EPI_ISL_1179899, EPI_ISL_1179900, EPI_ISL_1179901, EPI_ISL_1179902, EPI_ISL_1179903, EPI_ISL_1179904, EPI_ISL_1179905, EPI_ISL_1179906, EPI_ISL_1179907, EPI_ISL_1179908, EPI_ISL_1179909, EPI_ISL_1179910, EPI_ISL_1179912, EPI_ISL_1179913, EPI_ISL_1179914, EPI_ISL_1179915, EPI_ISL_1179916, EPI_ISL_1179917, EPI_ISL_1179918, EPI_ISL_1179919, EPI_ISL_1179920, EPI_ISL_1179921, EPI_ISL_1179922, EPI_ISL_1179923, EPI_ISL_1179924, EPI_ISL_1179925, EPI_ISL_1179926, EPI_ISL_1179927, EPI_ISL_1179928, EPI_ISL_1179929, EPI_ISL_1179930, EPI_ISL_1179931, EPI_ISL_1179932, EPI_ISL_1179934, EPI_ISL_1179937, EPI_ISL_1179938, EPI_ISL_1179939, EPI_ISL_1179940, EPI_ISL_1179941, EPI_ISL_1179942, EPI_ISL_1179943, EPI_ISL_1179944, EPI_ISL_1179945, EPI_ISL_1179946, EPI_ISL_1179947, EPI_ISL_1179948, EPI_ISL_1179949, EPI_ISL_1179950, EPI_ISL_1179954, EPI_ISL_1179965, EPI_ISL_1179966, EPI_ISL_1179967, EPI_ISL_1179968, EPI_ISL_1179969, EPI_ISL_1179970, EPI_ISL_1179971, EPI_ISL_1179972, EPI_ISL_1179973, EPI_ISL_1179974, EPI_ISL_1179979, EPI_ISL_1179980, EPI_ISL_1179981, EPI_ISL_1179982, EPI_ISL_1179984, EPI_ISL_1179985, EPI_ISL_1179986, EPI_ISL_1179987, EPI_ISL_1179988, EPI_ISL_1179989, EPI_ISL_1179997, EPI_ISL_1179998, EPI_ISL_1179999, EPI_ISL_1180000, EPI_ISL_1180001, EPI_ISL_1180002, EPI_ISL_1180003, EPI_ISL_1180004, EPI_ISL_1180005, EPI_ISL_1180006, EPI_ISL_1180007, EPI_ISL_1180008, EPI_ISL_1180009, EPI_ISL_1180010, EPI_ISL_1180011, EPI_ISL_1180012, EPI_ISL_1180013, EPI_ISL_1180014, EPI_ISL_1180015, EPI_ISL_1180016, EPI_ISL_1180018, EPI_ISL_1180019, EPI_ISL_1180020, EPI_ISL_1180021, EPI_ISL_1180022, EPI_ISL_1180029, EPI_ISL_1180030, EPI_ISL_1180031, EPI_ISL_1180032, EPI_ISL_1180033, EPI_ISL_1180034, EPI_ISL_1180035, EPI_ISL_1180036, EPI_ISL_1180037, EPI_ISL_1180038, EPI_ISL_1180039, EPI_ISL_1180040, EPI_ISL_1180041, EPI_ISL_1180042, EPI_ISL_1180043, EPI_ISL_1180044, EPI_ISL_1180045, EPI_ISL_1180046, EPI_ISL_1180047, EPI_ISL_1180048, EPI_ISL_1180049, EPI_ISL_1180050, EPI_ISL_1180051, EPI_ISL_1180052 | see above                                                                                                                                                                                                           | Department of Pathology, University of Cambridge | COVID-19 Genomics UK (COG-UK) Consortium                                                                                                                                                                                                                                                                                                                                                                                                                                                                                                                                                                                                                                                                   | Aminu S. Jahun, Yasmin Chaudhry, Iliana Georgana, Myra Hosmillo, Rhys Izuagbe, William L. Hamilton, Martin D. Curran, Surendra Parmar, Ian Goodfellow                                                                                                                                     |
| EPI_ISL_1180089                                                                                                                                                                                                                                                                                                                                                                                                                                                                                                                                                                                                                                                                                                                                                                                                                                                                                                                                                                                                                                                                                                                                                                                                                                                                                                                                                                                                                                                                                                                                                                                                                                                                                                                                                                                                                                                                                                                                                                                                                                                                                                                                                                                                              | Virology Department, Sheffield Teaching Hospitals NHS Foundation Trust/Department of Infection, Immunity and Cardiovascular Disease, The Medical School, University of Sheffield                                    | COVID-19 Genomics UK (COG-UK) Consortium         | Thushan de Silva, Matthew Parker, Nikki Smith, Adri Angyal, Rebecca Brown, Luke Green, Rachel Tucker, Paul Parsons, Danielle Groves, Katie Johnson, Laura Carrilero, Alex Keeley, Dave Partridge, Matthew Wyles, Benjamin Lindsey, Mehmet Yavuz, Mohammad Raza, Cariad Evans                                                                                                                                                                                                                                                                                                                                                                                                                               |                                                                                                                                                                                                                                                                                           |
| EPI_ISL_1224517, EPI_ISL_1224537, EPI_ISL_1224567, EPI_ISL_1224585, EPI_ISL_1224594, EPI_ISL_1224604, EPI_ISL_1224608, EPI_ISL_1224614, EPI_ISL_1224626, EPI_ISL_1224639, EPI_ISL_1224642, EPI_ISL_1224670, EPI_ISL_1224700, EPI_ISL_1224705, EPI_ISL_1242051, EPI_ISL_1242056, EPI_ISL_1242082, EPI_ISL_1242087, EPI_ISL_1242088, EPI_ISL_1242091, EPI_ISL_1242117, EPI_ISL_1242150, EPI_ISL_1242169, EPI_ISL_1242170, EPI_ISL_1242174, EPI_ISL_1242177, EPI_ISL_1242178, EPI_ISL_1242182, EPI_ISL_1242197, EPI_ISL_1242221, EPI_ISL_1242236, EPI_ISL_1242252                                                                                                                                                                                                                                                                                                                                                                                                                                                                                                                                                                                                                                                                                                                                                                                                                                                                                                                                                                                                                                                                                                                                                                                                                                                                                                                                                                                                                                                                                                                                                                                                                                                               | see above                                                                                                                                                                                                           | Lighthouse Lab in Cambridge                      | Wellcome Sanger Institute for the COVID-19 Genomics UK (COG-UK) Consortium                                                                                                                                                                                                                                                                                                                                                                                                                                                                                                                                                                                                                                 | Rob Howes, The Lighthouse Lab in Cambridge and Alex Alderton, Roberto Amato, Jeffrey Barrett, Sonia Goncalves, Ewan Harrison, David K. Jackson, Ian Johnston, Dominic Kwiatkowski, Cordelia Langford, John Sillitoe on behalf of the Wellcome Sanger Institute COVID-19 Surveillance Team |
| EPI_ISL_1247526                                                                                                                                                                                                                                                                                                                                                                                                                                                                                                                                                                                                                                                                                                                                                                                                                                                                                                                                                                                                                                                                                                                                                                                                                                                                                                                                                                                                                                                                                                                                                                                                                                                                                                                                                                                                                                                                                                                                                                                                                                                                                                                                                                                                              | University of Exeter                                                                                                                                                                                                | COVID-19 Genomics UK (COG-UK) Consortium         | Ben Temperton,Aaron Jeffries,Michelle Michelsen,Joanna Warwick-Dugdale,Audrey Farbos,Robyn Manley,Stephen Michell,Jane Masoli                                                                                                                                                                                                                                                                                                                                                                                                                                                                                                                                                                              |                                                                                                                                                                                                                                                                                           |
| EPI_ISL_1247728, EPI_ISL_1247730                                                                                                                                                                                                                                                                                                                                                                                                                                                                                                                                                                                                                                                                                                                                                                                                                                                                                                                                                                                                                                                                                                                                                                                                                                                                                                                                                                                                                                                                                                                                                                                                                                                                                                                                                                                                                                                                                                                                                                                                                                                                                                                                                                                             | Virology Department, Royal Infirmary of Edinburgh, NHS Lothian / School of Biological Sciences, University of Edinburgh                                                                                             | COVID-19 Genomics UK (COG-UK) Consortium         | McHugh M, Dewar R, Cotton S, Rooke S, O'Toole Á, Scher E, Hill V, McCrone JT, Colquhoun R, Yu X, Jackson B, Rambaut A, Templeton K                                                                                                                                                                                                                                                                                                                                                                                                                                                                                                                                                                         |                                                                                                                                                                                                                                                                                           |
| EPI_ISL_1247825, EPI_ISL_1247827                                                                                                                                                                                                                                                                                                                                                                                                                                                                                                                                                                                                                                                                                                                                                                                                                                                                                                                                                                                                                                                                                                                                                                                                                                                                                                                                                                                                                                                                                                                                                                                                                                                                                                                                                                                                                                                                                                                                                                                                                                                                                                                                                                                             | Liverpool Clinical Laboratories                                                                                                                                                                                     | COVID-19 Genomics UK (COG-UK) Consortium         | Sam Haldenby, Alistair Darby, Steve Paterson, Anita Lucaci, Julian Hiscox, M Almsaud, A Alrezaihi, Muhannad Alruwaili, Stuart D Armstrong, Jones Benjamin, Eleanor G Bentley, Anu Chawla, Jordan J Clark, Angela Cowell, Richard Eccles, Isabel Garcia-Dorival, Matthew Gemmell, Alessandro Gerada, PKF Gilmore, Richard Gregory, Ximeng Han, Catherine Hartley, Margaret Hughes, Miren Iturriza-Gomara, James Johnson, L Luu, Jenifer Manson, Charlotte Nelson, Elaine O'Toole, Cassie Olateju, Rebekah Penrice-Randal , Lucille Rainbow, N.P Randle, Trevor Ian Robinson, Parul Sharma, Ghada T Shawli, James P Stewart, Neil Swainston, Ecaterina Vamos, Joanne Watts, Mark Whitehead, Hermione Webster |                                                                                                                                                                                                                                                                                           |
| EPI_ISL_1248162, EPI_ISL_1248169, EPI_ISL_1248171, EPI_ISL_1248177, EPI_ISL_1248189, EPI_ISL_1248197, EPI_ISL_1248200                                                                                                                                                                                                                                                                                                                                                                                                                                                                                                                                                                                                                                                                                                                                                                                                                                                                                                                                                                                                                                                                                                                                                                                                                                                                                                                                                                                                                                                                                                                                                                                                                                                                                                                                                                                                                                                                                                                                                                                                                                                                                                        | University College London, Great Ormond Street Hospital for Children NHS Foundation Trust, Imperial College Healthcare NHS Trust                                                                                    | COVID-19 Genomics UK (COG-UK) Consortium         | Sergi Castellano, Rachel Williams, Mark Kristiansen, Paola Resende Silva, Sunando Roy, Tony Brooks, Helena Tutill, Paola Niola, Patricia Dyal, Charlotte Williams, Leysa Forrest, Yasmin Panchbhaya, Jacqueline Findlay, Samuel Weeks, Julianne Brown, Kathryn Harris, Paul Randell, James Price, Alison Holmes, Judith Breuer                                                                                                                                                                                                                                                                                                                                                                             |                                                                                                                                                                                                                                                                                           |
| EPI_ISL_1248945, EPI_ISL_1248947, EPI_ISL_1248950, EPI_ISL_1248951, EPI_ISL_1248953, EPI_ISL_1248955, EPI_ISL_1248956, EPI_ISL_1248958, EPI_ISL_1248959, EPI_ISL_1248961, EPI_ISL_1248962, EPI_ISL_1248979, EPI_ISL_1248984, EPI_ISL_1248987, EPI_ISL_1248994, EPI_ISL_1248999, EPI_ISL_1249004, EPI_ISL_1249008, EPI_ISL_1249013, EPI_ISL_1249025, EPI_ISL_1249028                                                                                                                                                                                                                                                                                                                                                                                                                                                                                                                                                                                                                                                                                                                                                                                                                                                                                                                                                                                                                                                                                                                                                                                                                                                                                                                                                                                                                                                                                                                                                                                                                                                                                                                                                                                                                                                          | see above                                                                                                                                                                                                           | COVID-19 Genomics UK (COG-UK) Consortium         | Dave J. Baker, Gemma L. Kay, Alp Aydin, Thanh Le-Viet, Steven Rudder, Ana P. Tedim, Anastasia Kolyva, Maria Diaz, Leonardo de Oliveira Martins, Nabil-Fareed Alikhan, Lizzie Meadows, Rachael Stanley, Ngozi Elumogo, Muhammed Yasir, Nicholas M. Thomson, Alexander J Trotter, Rachel Gilroy, Samuel Bloomfield, Claire Stuart, Andrew Bell, Reenesh Prakash, Samir Dervisevic, Alison E. Mather, John Wain, Mark Webber, Andrew J. Page, Justin O'Grady                                                                                                                                                                                                                                                  |                                                                                                                                                                                                                                                                                           |
| EPI_ISL_1249224, EPI_ISL_1249241                                                                                                                                                                                                                                                                                                                                                                                                                                                                                                                                                                                                                                                                                                                                                                                                                                                                                                                                                                                                                                                                                                                                                                                                                                                                                                                                                                                                                                                                                                                                                                                                                                                                                                                                                                                                                                                                                                                                                                                                                                                                                                                                                                                             | Oxford Viromics, NDM, University of Oxford; Oxford University Hospitals; Basingstoke and North Hampshire Hospital                                                                                                   | COVID-19 Genomics UK (COG-UK) Consortium         | Tanya Golubchik, David Bonsall, George Macintyre, Amy Trebes, Mariateresa de Cesare, Catrin Moore, Alex Mobbs, Anita Justice, Robert Shaw, Monique Andersson, Timothy Peto, Emma Wise, Nathan Moore, Jessica Lynch, Nick Cortes, Matilde Mori, Stephen Kidd, David Buck, John Todd, Christophe Fraser                                                                                                                                                                                                                                                                                                                                                                                                      |                                                                                                                                                                                                                                                                                           |
| EPI_ISL_1250029                                                                                                                                                                                                                                                                                                                                                                                                                                                                                                                                                                                                                                                                                                                                                                                                                                                                                                                                                                                                                                                                                                                                                                                                                                                                                                                                                                                                                                                                                                                                                                                                                                                                                                                                                                                                                                                                                                                                                                                                                                                                                                                                                                                                              | Centre for Enzyme Innovation, University of Portsmouth / Translational Research Laboratory, Portsmouth Hospitals NHS Trust                                                                                          | COVID-19 Genomics UK (COG-UK) Consortium         | Angela Beckett,Salman Goudarzi,Christopher Fearn,Kate Cook,Katie Loveson,Sharon Glaysher,Scott Elliott,Samuel Robson                                                                                                                                                                                                                                                                                                                                                                                                                                                                                                                                                                                       |                                                                                                                                                                                                                                                                                           |
| EPI_ISL_1296587, EPI_ISL_1296589, EPI_ISL_1296590, EPI_ISL_1296591, EPI_ISL_1296592, EPI_ISL_1296593, EPI_ISL_1296597, EPI_ISL_1296598                                                                                                                                                                                                                                                                                                                                                                                                                                                                                                                                                                                                                                                                                                                                                                                                                                                                                                                                                                                                                                                                                                                                                                                                                                                                                                                                                                                                                                                                                                                                                                                                                                                                                                                                                                                                                                                                                                                                                                                                                                                                                       | Respiratory Virus Unit, National Infection Service, Public Health England                                                                                                                                           | COVID-19 Genomics UK (COG-UK) Consortium         | PHE Covid Sequencing Team                                                                                                                                                                                                                                                                                                                                                                                                                                                                                                                                                                                                                                                                                  |                                                                                                                                                                                                                                                                                           |
| EPI_ISL_1308567, EPI_ISL_1308579, EPI_ISL_1308642                                                                                                                                                                                                                                                                                                                                                                                                                                                                                                                                                                                                                                                                                                                                                                                                                                                                                                                                                                                                                                                                                                                                                                                                                                                                                                                                                                                                                                                                                                                                                                                                                                                                                                                                                                                                                                                                                                                                                                                                                                                                                                                                                                            | University of Exeter                                                                                                                                                                                                | COVID-19 Genomics UK (COG-UK) Consortium         | Ben Temperton,Aaron Jeffries,Michelle Michelsen,Joanna Warwick-Dugdale,Audrey Farbos,Robyn Manley,Stephen Michell,Jane Masoli                                                                                                                                                                                                                                                                                                                                                                                                                                                                                                                                                                              |                                                                                                                                                                                                                                                                                           |
| EPI_ISL_1308822, EPI_ISL_1308841                                                                                                                                                                                                                                                                                                                                                                                                                                                                                                                                                                                                                                                                                                                                                                                                                                                                                                                                                                                                                                                                                                                                                                                                                                                                                                                                                                                                                                                                                                                                                                                                                                                                                                                                                                                                                                                                                                                                                                                                                                                                                                                                                                                             | Virology Department, Royal Infirmary of Edinburgh, NHS Lothian / School of Biological Sciences, University of Edinburgh                                                                                             | COVID-19 Genomics UK (COG-UK) Consortium         | McHugh M, Dewar R, Cotton S, Rooke S, O'Toole Á, Scher E, Hill V, McCrone JT, Colquhoun R, Yu X, Jackson B, Rambaut A, Templeton K                                                                                                                                                                                                                                                                                                                                                                                                                                                                                                                                                                         |                                                                                                                                                                                                                                                                                           |

|                                                                                                                                                                                                                                                                                                                                                                                                                                                                                                                                                                                                                                                                                                                                                                                                                                                                                                                                                                                                                                                                                                                                                                                                                                                                                                                                                                                                                                                                                                                                                                                                                                                                                                                                                                                                                                                                                                                                                                                                                                                                                                                                                                                                                                                                                                                                                                                                                                                                                                                                                                                                                                                                                                                                                                                                                                                                                                                                                                                                                                                                                                                                                                                                                                                                                                                                                                                                                                                                                                                                                                                                                                                                                                                                                                                                                                                                                                                                                                                                                                                                                                                                                                                                                                                                                                                                                                                                                                                                                                                                                                                                                                                                                                                                                |                                                                                                                                                                                  |                                                                            |                                                                                                                                                                                                                                                                                                                                                                                                                                              |
|------------------------------------------------------------------------------------------------------------------------------------------------------------------------------------------------------------------------------------------------------------------------------------------------------------------------------------------------------------------------------------------------------------------------------------------------------------------------------------------------------------------------------------------------------------------------------------------------------------------------------------------------------------------------------------------------------------------------------------------------------------------------------------------------------------------------------------------------------------------------------------------------------------------------------------------------------------------------------------------------------------------------------------------------------------------------------------------------------------------------------------------------------------------------------------------------------------------------------------------------------------------------------------------------------------------------------------------------------------------------------------------------------------------------------------------------------------------------------------------------------------------------------------------------------------------------------------------------------------------------------------------------------------------------------------------------------------------------------------------------------------------------------------------------------------------------------------------------------------------------------------------------------------------------------------------------------------------------------------------------------------------------------------------------------------------------------------------------------------------------------------------------------------------------------------------------------------------------------------------------------------------------------------------------------------------------------------------------------------------------------------------------------------------------------------------------------------------------------------------------------------------------------------------------------------------------------------------------------------------------------------------------------------------------------------------------------------------------------------------------------------------------------------------------------------------------------------------------------------------------------------------------------------------------------------------------------------------------------------------------------------------------------------------------------------------------------------------------------------------------------------------------------------------------------------------------------------------------------------------------------------------------------------------------------------------------------------------------------------------------------------------------------------------------------------------------------------------------------------------------------------------------------------------------------------------------------------------------------------------------------------------------------------------------------------------------------------------------------------------------------------------------------------------------------------------------------------------------------------------------------------------------------------------------------------------------------------------------------------------------------------------------------------------------------------------------------------------------------------------------------------------------------------------------------------------------------------------------------------------------------------------------------------------------------------------------------------------------------------------------------------------------------------------------------------------------------------------------------------------------------------------------------------------------------------------------------------------------------------------------------------------------------------------------------------------------------------------------------------------------|----------------------------------------------------------------------------------------------------------------------------------------------------------------------------------|----------------------------------------------------------------------------|----------------------------------------------------------------------------------------------------------------------------------------------------------------------------------------------------------------------------------------------------------------------------------------------------------------------------------------------------------------------------------------------------------------------------------------------|
| EPI_ISL_1333480                                                                                                                                                                                                                                                                                                                                                                                                                                                                                                                                                                                                                                                                                                                                                                                                                                                                                                                                                                                                                                                                                                                                                                                                                                                                                                                                                                                                                                                                                                                                                                                                                                                                                                                                                                                                                                                                                                                                                                                                                                                                                                                                                                                                                                                                                                                                                                                                                                                                                                                                                                                                                                                                                                                                                                                                                                                                                                                                                                                                                                                                                                                                                                                                                                                                                                                                                                                                                                                                                                                                                                                                                                                                                                                                                                                                                                                                                                                                                                                                                                                                                                                                                                                                                                                                                                                                                                                                                                                                                                                                                                                                                                                                                                                                | Lighthouse Lab in Cambridge                                                                                                                                                      | Wellcome Sanger Institute for the COVID-19 Genomics UK (COG-UK) Consortium | Rob Howes, The Lighthouse Lab in Cambridge and Alex Alderton, Roberto Amato, Jeffrey Barrett, Sonia Goncalves, Ewan Harrison, David K. Jackson, Ian Johnston, Dominic Kwiatkowski, Cordelia Langford, John Sillitoe on behalf of the Wellcome Sanger Institute COVID-19 Surveillance Team                                                                                                                                                    |
| EPI_ISL_1387213, EPI_ISL_1387216, EPI_ISL_1387217                                                                                                                                                                                                                                                                                                                                                                                                                                                                                                                                                                                                                                                                                                                                                                                                                                                                                                                                                                                                                                                                                                                                                                                                                                                                                                                                                                                                                                                                                                                                                                                                                                                                                                                                                                                                                                                                                                                                                                                                                                                                                                                                                                                                                                                                                                                                                                                                                                                                                                                                                                                                                                                                                                                                                                                                                                                                                                                                                                                                                                                                                                                                                                                                                                                                                                                                                                                                                                                                                                                                                                                                                                                                                                                                                                                                                                                                                                                                                                                                                                                                                                                                                                                                                                                                                                                                                                                                                                                                                                                                                                                                                                                                                              | Oxford Viromics, NDM, University of Oxford; Oxford University Hospitals; Basingstoke and North Hampshire Hospital                                                                | COVID-19 Genomics UK (COG-UK) Consortium                                   | Tanya Golubchik, David Bonsall, George Macintyre, Amy Trebes, Mariateresa de Cesare, Catrin Moore, Alex Mobbs, Anita Justice, Robert Shaw, Monique Andersson, Timothy Peto, Emma Wise, Nathan Moore, Jessica Lynch, Nick Cortes, Matilde Mori, Stephen Kidd, David Buck, John Todd, Christophe Fraser                                                                                                                                        |
| EPI_ISL_1449684                                                                                                                                                                                                                                                                                                                                                                                                                                                                                                                                                                                                                                                                                                                                                                                                                                                                                                                                                                                                                                                                                                                                                                                                                                                                                                                                                                                                                                                                                                                                                                                                                                                                                                                                                                                                                                                                                                                                                                                                                                                                                                                                                                                                                                                                                                                                                                                                                                                                                                                                                                                                                                                                                                                                                                                                                                                                                                                                                                                                                                                                                                                                                                                                                                                                                                                                                                                                                                                                                                                                                                                                                                                                                                                                                                                                                                                                                                                                                                                                                                                                                                                                                                                                                                                                                                                                                                                                                                                                                                                                                                                                                                                                                                                                | Lighthouse Lab in Alderley Park                                                                                                                                                  | Wellcome Sanger Institute for the COVID-19 Genomics UK (COG-UK) Consortium | Jacquelyn Wynn, Mairead Hyland, The Lighthouse Lab in Alderley Park and Alex Alderton, Roberto Amato, Jeffrey Barrett, Sonia Goncalves, Ewan Harrison, David K. Jackson, Ian Johnston, Dominic Kwiatkowski, Cordelia Langford, John Sillitoe on behalf of the Wellcome Sanger Institute COVID-19 Surveillance Team                                                                                                                           |
| EPI_ISL_1474996, EPI_ISL_1474997, EPI_ISL_1474998, EPI_ISL_1475000, EPI_ISL_1475017, EPI_ISL_1475036, EPI_ISL_1475037, EPI_ISL_1475038, EPI_ISL_1475039, EPI_ISL_1475043, EPI_ISL_1475044, EPI_ISL_1475138, EPI_ISL_1475141, EPI_ISL_1475142                                                                                                                                                                                                                                                                                                                                                                                                                                                                                                                                                                                                                                                                                                                                                                                                                                                                                                                                                                                                                                                                                                                                                                                                                                                                                                                                                                                                                                                                                                                                                                                                                                                                                                                                                                                                                                                                                                                                                                                                                                                                                                                                                                                                                                                                                                                                                                                                                                                                                                                                                                                                                                                                                                                                                                                                                                                                                                                                                                                                                                                                                                                                                                                                                                                                                                                                                                                                                                                                                                                                                                                                                                                                                                                                                                                                                                                                                                                                                                                                                                                                                                                                                                                                                                                                                                                                                                                                                                                                                                   |                                                                                                                                                                                  |                                                                            |                                                                                                                                                                                                                                                                                                                                                                                                                                              |
| see above                                                                                                                                                                                                                                                                                                                                                                                                                                                                                                                                                                                                                                                                                                                                                                                                                                                                                                                                                                                                                                                                                                                                                                                                                                                                                                                                                                                                                                                                                                                                                                                                                                                                                                                                                                                                                                                                                                                                                                                                                                                                                                                                                                                                                                                                                                                                                                                                                                                                                                                                                                                                                                                                                                                                                                                                                                                                                                                                                                                                                                                                                                                                                                                                                                                                                                                                                                                                                                                                                                                                                                                                                                                                                                                                                                                                                                                                                                                                                                                                                                                                                                                                                                                                                                                                                                                                                                                                                                                                                                                                                                                                                                                                                                                                      | Regional Virus Laboratory, Belfast Health and Social Care Trust                                                                                                                  | COVID-19 Genomics UK (COG-UK) Consortium                                   | Conall McCaughey, James McKenna, Tanya Curran, Susan Feeoney, Alison Watt, Ciara Cox, Mairead Connor, Zoltan Molnar, David Simpson, Derek Fairley                                                                                                                                                                                                                                                                                            |
| EPI_ISL_907237                                                                                                                                                                                                                                                                                                                                                                                                                                                                                                                                                                                                                                                                                                                                                                                                                                                                                                                                                                                                                                                                                                                                                                                                                                                                                                                                                                                                                                                                                                                                                                                                                                                                                                                                                                                                                                                                                                                                                                                                                                                                                                                                                                                                                                                                                                                                                                                                                                                                                                                                                                                                                                                                                                                                                                                                                                                                                                                                                                                                                                                                                                                                                                                                                                                                                                                                                                                                                                                                                                                                                                                                                                                                                                                                                                                                                                                                                                                                                                                                                                                                                                                                                                                                                                                                                                                                                                                                                                                                                                                                                                                                                                                                                                                                 | Lighthouse Lab in Glasgow                                                                                                                                                        | Wellcome Sanger Institute for the COVID-19 Genomics UK (COG-UK) Consortium | Harper VanSteenhouse, Yumi Kasai, David Gray, Carol Clugston, Anna Dominiczak and Alex Alderton, Roberto Amato, Sonia Goncalves, Ewan Harrison, David K. Jackson, Ian Johnston, Dominic Kwiatkowski, Cordelia Langford, John Sillitoe on behalf of the Wellcome Sanger Institute COVID-19 Surveillance Team                                                                                                                                  |
| EPI_ISL_924084, EPI_ISL_924101, EPI_ISL_924104, EPI_ISL_924108, EPI_ISL_924119, EPI_ISL_924122, EPI_ISL_924128, EPI_ISL_924148, EPI_ISL_924164, EPI_ISL_924176, EPI_ISL_924196, EPI_ISL_924197, EPI_ISL_924203, EPI_ISL_924215, EPI_ISL_924225, EPI_ISL_924240, EPI_ISL_924245, EPI_ISL_924252, EPI_ISL_924265, EPI_ISL_924274, EPI_ISL_924302, EPI_ISL_924328, EPI_ISL_924332, EPI_ISL_924334, EPI_ISL_924384, EPI_ISL_924389, EPI_ISL_924392, EPI_ISL_924397, EPI_ISL_924406                                                                                                                                                                                                                                                                                                                                                                                                                                                                                                                                                                                                                                                                                                                                                                                                                                                                                                                                                                                                                                                                                                                                                                                                                                                                                                                                                                                                                                                                                                                                                                                                                                                                                                                                                                                                                                                                                                                                                                                                                                                                                                                                                                                                                                                                                                                                                                                                                                                                                                                                                                                                                                                                                                                                                                                                                                                                                                                                                                                                                                                                                                                                                                                                                                                                                                                                                                                                                                                                                                                                                                                                                                                                                                                                                                                                                                                                                                                                                                                                                                                                                                                                                                                                                                                                 |                                                                                                                                                                                  |                                                                            |                                                                                                                                                                                                                                                                                                                                                                                                                                              |
| see above                                                                                                                                                                                                                                                                                                                                                                                                                                                                                                                                                                                                                                                                                                                                                                                                                                                                                                                                                                                                                                                                                                                                                                                                                                                                                                                                                                                                                                                                                                                                                                                                                                                                                                                                                                                                                                                                                                                                                                                                                                                                                                                                                                                                                                                                                                                                                                                                                                                                                                                                                                                                                                                                                                                                                                                                                                                                                                                                                                                                                                                                                                                                                                                                                                                                                                                                                                                                                                                                                                                                                                                                                                                                                                                                                                                                                                                                                                                                                                                                                                                                                                                                                                                                                                                                                                                                                                                                                                                                                                                                                                                                                                                                                                                                      | Virology Department, Sheffield Teaching Hospitals NHS Foundation Trust/Department of Infection, Immunity and Cardiovascular Disease, The Medical School, University of Sheffield | COVID-19 Genomics UK (COG-UK) Consortium                                   | Thushan de Silva, Matthew Parker, Nikki Smith, Adri Angyal, Rebecca Brown, Luke Green, Rachel Tucker, Paul Parsons, Danielle Groves, Katie Johnson, Laura Carrilero, Alex Keeley, Dave Partridge, Matthew Wyles, Benjamin Lindsey, Mehmet Yavuz, Mohammad Raza, Cariad Evans                                                                                                                                                                 |
| EPI_ISL_944792, EPI_ISL_944793, EPI_ISL_944794, EPI_ISL_944795, EPI_ISL_944796, EPI_ISL_944797, EPI_ISL_944798, EPI_ISL_944800, EPI_ISL_944801, EPI_ISL_944802, EPI_ISL_944803, EPI_ISL_944804, EPI_ISL_944806, EPI_ISL_944807, EPI_ISL_944808, EPI_ISL_944809, EPI_ISL_944810, EPI_ISL_944811, EPI_ISL_944812, EPI_ISL_944813, EPI_ISL_944814, EPI_ISL_944815, EPI_ISL_944816, EPI_ISL_944817, EPI_ISL_944818, EPI_ISL_944819, EPI_ISL_944820, EPI_ISL_944821, EPI_ISL_944822, EPI_ISL_944823, EPI_ISL_944825, EPI_ISL_944826, EPI_ISL_944827, EPI_ISL_944828, EPI_ISL_944829, EPI_ISL_944830, EPI_ISL_944831, EPI_ISL_944832, EPI_ISL_944833, EPI_ISL_944834, EPI_ISL_944835, EPI_ISL_944836, EPI_ISL_944837, EPI_ISL_944838, EPI_ISL_944839, EPI_ISL_944840, EPI_ISL_944841, EPI_ISL_944842, EPI_ISL_944843, EPI_ISL_944845, EPI_ISL_944846, EPI_ISL_944847, EPI_ISL_944848, EPI_ISL_944849, EPI_ISL_944850, EPI_ISL_944851, EPI_ISL_944852, EPI_ISL_944853, EPI_ISL_944854, EPI_ISL_944855, EPI_ISL_944856, EPI_ISL_944857, EPI_ISL_944858, EPI_ISL_944859, EPI_ISL_944860, EPI_ISL_944861, EPI_ISL_944862, EPI_ISL_944863, EPI_ISL_944864, EPI_ISL_944865, EPI_ISL_944866, EPI_ISL_944867, EPI_ISL_944868, EPI_ISL_944869, EPI_ISL_944870, EPI_ISL_944871, EPI_ISL_944872, EPI_ISL_944873, EPI_ISL_944874, EPI_ISL_944875, EPI_ISL_944876, EPI_ISL_944877, EPI_ISL_944878, EPI_ISL_944879, EPI_ISL_944880, EPI_ISL_944881, EPI_ISL_944882, EPI_ISL_944883, EPI_ISL_944884, EPI_ISL_944885, EPI_ISL_944886, EPI_ISL_944887, EPI_ISL_944888, EPI_ISL_944889, EPI_ISL_944890, EPI_ISL_944891, EPI_ISL_944892, EPI_ISL_944893, EPI_ISL_944894, EPI_ISL_944895, EPI_ISL_944896, EPI_ISL_944897, EPI_ISL_944898, EPI_ISL_944899, EPI_ISL_944900, EPI_ISL_944901, EPI_ISL_944902, EPI_ISL_944903, EPI_ISL_944904, EPI_ISL_944905, EPI_ISL_944906, EPI_ISL_944907, EPI_ISL_944909, EPI_ISL_944910, EPI_ISL_944911, EPI_ISL_944912, EPI_ISL_944913, EPI_ISL_944915, EPI_ISL_944916, EPI_ISL_944917, EPI_ISL_944918, EPI_ISL_944919, EPI_ISL_944920, EPI_ISL_944921, EPI_ISL_944922, EPI_ISL_944924, EPI_ISL_944925, EPI_ISL_944926, EPI_ISL_944927, EPI_ISL_944928, EPI_ISL_944929, EPI_ISL_944930, EPI_ISL_944931, EPI_ISL_944932, EPI_ISL_944933, EPI_ISL_944934, EPI_ISL_944935, EPI_ISL_944936, EPI_ISL_944937, EPI_ISL_944938, EPI_ISL_944939, EPI_ISL_944940, EPI_ISL_944941, EPI_ISL_944942, EPI_ISL_944943, EPI_ISL_944944, EPI_ISL_944945, EPI_ISL_944946, EPI_ISL_944947, EPI_ISL_944948, EPI_ISL_944949, EPI_ISL_944950, EPI_ISL_944951, EPI_ISL_944952, EPI_ISL_944954, EPI_ISL_944955, EPI_ISL_944956, EPI_ISL_944957, EPI_ISL_944958, EPI_ISL_944959, EPI_ISL_944960, EPI_ISL_944961, EPI_ISL_944962, EPI_ISL_944963, EPI_ISL_944964, EPI_ISL_944965, EPI_ISL_944966, EPI_ISL_944967, EPI_ISL_944968, EPI_ISL_944969, EPI_ISL_944970, EPI_ISL_944971, EPI_ISL_944972, EPI_ISL_944973, EPI_ISL_944974, EPI_ISL_944975, EPI_ISL_944976, EPI_ISL_944977, EPI_ISL_944978, EPI_ISL_944979, EPI_ISL_944980, EPI_ISL_944981, EPI_ISL_944982, EPI_ISL_944983, EPI_ISL_944984, EPI_ISL_944985, EPI_ISL_944986, EPI_ISL_944987, EPI_ISL_944988, EPI_ISL_944989, EPI_ISL_944990, EPI_ISL_944991, EPI_ISL_944992, EPI_ISL_944993, EPI_ISL_944994, EPI_ISL_944995, EPI_ISL_944996, EPI_ISL_944997, EPI_ISL_944998, EPI_ISL_944999, EPI_ISL_945000, EPI_ISL_945001, EPI_ISL_945002, EPI_ISL_945003, EPI_ISL_945004, EPI_ISL_945005, EPI_ISL_945006, EPI_ISL_945007, EPI_ISL_945008, EPI_ISL_945009, EPI_ISL_945010, EPI_ISL_945011, EPI_ISL_945012, EPI_ISL_945013, EPI_ISL_945014, EPI_ISL_945015, EPI_ISL_945016, EPI_ISL_945017, EPI_ISL_945018, EPI_ISL_945019, EPI_ISL_945020, EPI_ISL_945021, EPI_ISL_945022, EPI_ISL_945024, EPI_ISL_945025, EPI_ISL_945026, EPI_ISL_945027, EPI_ISL_945028, EPI_ISL_945029, EPI_ISL_945030, EPI_ISL_945031, EPI_ISL_945033, EPI_ISL_945035, EPI_ISL_945036, EPI_ISL_945037, EPI_ISL_945038, EPI_ISL_945039, EPI_ISL_945040, EPI_ISL_945041, EPI_ISL_945042, EPI_ISL_945043, EPI_ISL_945044, EPI_ISL_945045, EPI_ISL_945046, EPI_ISL_945047, EPI_ISL_945048                                                                                                                                                                                                                                                                                                                                                                                                                                                                                                                                                                                                                                                 |                                                                                                                                                                                  |                                                                            |                                                                                                                                                                                                                                                                                                                                                                                                                                              |
| see above                                                                                                                                                                                                                                                                                                                                                                                                                                                                                                                                                                                                                                                                                                                                                                                                                                                                                                                                                                                                                                                                                                                                                                                                                                                                                                                                                                                                                                                                                                                                                                                                                                                                                                                                                                                                                                                                                                                                                                                                                                                                                                                                                                                                                                                                                                                                                                                                                                                                                                                                                                                                                                                                                                                                                                                                                                                                                                                                                                                                                                                                                                                                                                                                                                                                                                                                                                                                                                                                                                                                                                                                                                                                                                                                                                                                                                                                                                                                                                                                                                                                                                                                                                                                                                                                                                                                                                                                                                                                                                                                                                                                                                                                                                                                      | Lighthouse Lab in Glasgow                                                                                                                                                        | Wellcome Sanger Institute for the COVID-19 Genomics UK (COG-UK) Consortium | Harper VanSteenhouse, Yumi Kasai, David Gray, Carol Clugston, Anna Dominiczak and Alex Alderton, Roberto Amato, Sonia Goncalves, Ewan Harrison, David K. Jackson, Ian Johnston, Dominic Kwiatkowski, Cordelia Langford, John Sillitoe on behalf of the Wellcome Sanger Institute COVID-19 Surveillance Team                                                                                                                                  |
| EPI_ISL_945374, EPI_ISL_945375, EPI_ISL_945376, EPI_ISL_945379, EPI_ISL_945386, EPI_ISL_945387, EPI_ISL_945389, EPI_ISL_945402, EPI_ISL_945408, EPI_ISL_945409, EPI_ISL_945419, EPI_ISL_945420, EPI_ISL_945422, EPI_ISL_945423, EPI_ISL_945444, EPI_ISL_945446, EPI_ISL_945449, EPI_ISL_945458, EPI_ISL_945459, EPI_ISL_945466, EPI_ISL_945467, EPI_ISL_945468, EPI_ISL_945469, EPI_ISL_945475, EPI_ISL_945480, EPI_ISL_945485, EPI_ISL_945490, EPI_ISL_945494, EPI_ISL_945495, EPI_ISL_945498, EPI_ISL_945502, EPI_ISL_945506, EPI_ISL_945508, EPI_ISL_945514, EPI_ISL_945518, EPI_ISL_945522, EPI_ISL_945525, EPI_ISL_945529, EPI_ISL_945538, EPI_ISL_945539, EPI_ISL_945543, EPI_ISL_945545, EPI_ISL_945546, EPI_ISL_945548, EPI_ISL_945549, EPI_ISL_945555, EPI_ISL_945561, EPI_ISL_945563, EPI_ISL_945569, EPI_ISL_945579, EPI_ISL_945582, EPI_ISL_945587, EPI_ISL_945589, EPI_ISL_945591, EPI_ISL_945597, EPI_ISL_945619, EPI_ISL_945621, EPI_ISL_945627, EPI_ISL_945635, EPI_ISL_945636, EPI_ISL_945648, EPI_ISL_945650, EPI_ISL_945656, EPI_ISL_945664, EPI_ISL_945668, EPI_ISL_945672, EPI_ISL_945674, EPI_ISL_945677, EPI_ISL_945678, EPI_ISL_945682, EPI_ISL_945692, EPI_ISL_945696, EPI_ISL_945697, EPI_ISL_945698, EPI_ISL_945701, EPI_ISL_945704                                                                                                                                                                                                                                                                                                                                                                                                                                                                                                                                                                                                                                                                                                                                                                                                                                                                                                                                                                                                                                                                                                                                                                                                                                                                                                                                                                                                                                                                                                                                                                                                                                                                                                                                                                                                                                                                                                                                                                                                                                                                                                                                                                                                                                                                                                                                                                                                                                                                                                                                                                                                                                                                                                                                                                                                                                                                                                                                                                                                                                                                                                                                                                                                                                                                                                                                                                                                                                                                                 |                                                                                                                                                                                  |                                                                            |                                                                                                                                                                                                                                                                                                                                                                                                                                              |
| see above                                                                                                                                                                                                                                                                                                                                                                                                                                                                                                                                                                                                                                                                                                                                                                                                                                                                                                                                                                                                                                                                                                                                                                                                                                                                                                                                                                                                                                                                                                                                                                                                                                                                                                                                                                                                                                                                                                                                                                                                                                                                                                                                                                                                                                                                                                                                                                                                                                                                                                                                                                                                                                                                                                                                                                                                                                                                                                                                                                                                                                                                                                                                                                                                                                                                                                                                                                                                                                                                                                                                                                                                                                                                                                                                                                                                                                                                                                                                                                                                                                                                                                                                                                                                                                                                                                                                                                                                                                                                                                                                                                                                                                                                                                                                      | Lighthouse Lab in Alderley Park                                                                                                                                                  | Wellcome Sanger Institute for the COVID-19 Genomics UK (COG-UK) Consortium | Jacquelyn Wynn, Mairead Hyland, The Lighthouse Lab in Alderley Park and Alex Alderton, Roberto Amato, Sonia Goncalves, Ewan Harrison, David K. Jackson, Ian Johnston, Dominic Kwiatkowski, Cordelia Langford, John Sillitoe on behalf of the Wellcome Sanger Institute COVID-19 Surveillance Team                                                                                                                                            |
| EPI_ISL_945716, EPI_ISL_945718, EPI_ISL_945722, EPI_ISL_945725, EPI_ISL_945726, EPI_ISL_945728, EPI_ISL_945729, EPI_ISL_945730, EPI_ISL_945732, EPI_ISL_945733, EPI_ISL_945735, EPI_ISL_945736, EPI_ISL_945737, EPI_ISL_945738, EPI_ISL_945741, EPI_ISL_945742, EPI_ISL_945743, EPI_ISL_945744, EPI_ISL_945747, EPI_ISL_945753, EPI_ISL_945755, EPI_ISL_945757, EPI_ISL_945758, EPI_ISL_945759, EPI_ISL_945762, EPI_ISL_945763, EPI_ISL_945768, EPI_ISL_945771, EPI_ISL_945772, EPI_ISL_945776, EPI_ISL_945777, EPI_ISL_945781, EPI_ISL_945782, EPI_ISL_945788, EPI_ISL_945792, EPI_ISL_945795, EPI_ISL_945796, EPI_ISL_945799, EPI_ISL_945800, EPI_ISL_945802, EPI_ISL_945803, EPI_ISL_945804, EPI_ISL_945806, EPI_ISL_945807, EPI_ISL_945808, EPI_ISL_945810, EPI_ISL_945812, EPI_ISL_945816, EPI_ISL_945817, EPI_ISL_945818, EPI_ISL_945821, EPI_ISL_945822, EPI_ISL_945824, EPI_ISL_945826, EPI_ISL_945828, EPI_ISL_945831, EPI_ISL_945835, EPI_ISL_945836, EPI_ISL_945839, EPI_ISL_945841, EPI_ISL_945843, EPI_ISL_945844, EPI_ISL_945846, EPI_ISL_945848, EPI_ISL_945849, EPI_ISL_945851, EPI_ISL_945853, EPI_ISL_945860, EPI_ISL_945862, EPI_ISL_945863, EPI_ISL_945865, EPI_ISL_945867, EPI_ISL_945868, EPI_ISL_945869, EPI_ISL_945870, EPI_ISL_945871, EPI_ISL_945872, EPI_ISL_945873, EPI_ISL_945874, EPI_ISL_945877, EPI_ISL_945878, EPI_ISL_945879, EPI_ISL_945882, EPI_ISL_945884, EPI_ISL_945885, EPI_ISL_945889, EPI_ISL_945895, EPI_ISL_945896, EPI_ISL_945899, EPI_ISL_945900, EPI_ISL_945901, EPI_ISL_945904, EPI_ISL_945906, EPI_ISL_945907, EPI_ISL_945908, EPI_ISL_945909, EPI_ISL_945910, EPI_ISL_945911, EPI_ISL_945914, EPI_ISL_945916, EPI_ISL_945917, EPI_ISL_945918, EPI_ISL_945919, EPI_ISL_945920, EPI_ISL_945921, EPI_ISL_945926, EPI_ISL_945933, EPI_ISL_945935, EPI_ISL_945938, EPI_ISL_945939, EPI_ISL_945940, EPI_ISL_945944, EPI_ISL_945945, EPI_ISL_945950, EPI_ISL_945951, EPI_ISL_945954, EPI_ISL_945956, EPI_ISL_945958, EPI_ISL_945960, EPI_ISL_945961, EPI_ISL_945962, EPI_ISL_945963, EPI_ISL_945965, EPI_ISL_945967, EPI_ISL_945969, EPI_ISL_945970, EPI_ISL_945971, EPI_ISL_945972, EPI_ISL_945976, EPI_ISL_945979, EPI_ISL_945980, EPI_ISL_945983, EPI_ISL_945984, EPI_ISL_945988, EPI_ISL_945990, EPI_ISL_945993, EPI_ISL_945994, EPI_ISL_945997, EPI_ISL_945998, EPI_ISL_945999, EPI_ISL_946000, EPI_ISL_946002, EPI_ISL_946005, EPI_ISL_946006, EPI_ISL_946007, EPI_ISL_946008, EPI_ISL_946009, EPI_ISL_946010, EPI_ISL_946011, EPI_ISL_946014, EPI_ISL_946021, EPI_ISL_946023, EPI_ISL_946026, EPI_ISL_946028, EPI_ISL_946030, EPI_ISL_946033, EPI_ISL_946037, EPI_ISL_946041, EPI_ISL_946048, EPI_ISL_946049, EPI_ISL_946052, EPI_ISL_946055, EPI_ISL_946057, EPI_ISL_946058, EPI_ISL_946059, EPI_ISL_946062, EPI_ISL_946066, EPI_ISL_946067, EPI_ISL_946068, EPI_ISL_946069, EPI_ISL_946070, EPI_ISL_946071, EPI_ISL_946072, EPI_ISL_946073, EPI_ISL_946076, EPI_ISL_946080, EPI_ISL_946086, EPI_ISL_946087, EPI_ISL_946088, EPI_ISL_946090, EPI_ISL_946093, EPI_ISL_946096, EPI_ISL_946106, EPI_ISL_946109, EPI_ISL_946110, EPI_ISL_946112, EPI_ISL_946113, EPI_ISL_946115, EPI_ISL_946123, EPI_ISL_946124, EPI_ISL_946126, EPI_ISL_946127, EPI_ISL_946128, EPI_ISL_946130, EPI_ISL_946131, EPI_ISL_946132, EPI_ISL_946135, EPI_ISL_946137, EPI_ISL_946145, EPI_ISL_946147, EPI_ISL_946149, EPI_ISL_946150, EPI_ISL_946157, EPI_ISL_946160, EPI_ISL_946162, EPI_ISL_946169, EPI_ISL_946173, EPI_ISL_946174, EPI_ISL_946176, EPI_ISL_946177, EPI_ISL_946180, EPI_ISL_946181, EPI_ISL_946182, EPI_ISL_946188, EPI_ISL_946190, EPI_ISL_946192, EPI_ISL_946196, EPI_ISL_946199, EPI_ISL_946202, EPI_ISL_946206, EPI_ISL_946208, EPI_ISL_946210, EPI_ISL_946211, EPI_ISL_946213, EPI_ISL_946215, EPI_ISL_946218, EPI_ISL_946220, EPI_ISL_946221, EPI_ISL_946224, EPI_ISL_946225, EPI_ISL_946227, EPI_ISL_946229, EPI_ISL_946231, EPI_ISL_946232, EPI_ISL_946233, EPI_ISL_946234, EPI_ISL_946243, EPI_ISL_946250, EPI_ISL_946253, EPI_ISL_946254, EPI_ISL_946260, EPI_ISL_946264, EPI_ISL_946270, EPI_ISL_946271, EPI_ISL_946274, EPI_ISL_946281, EPI_ISL_946284, EPI_ISL_946285, EPI_ISL_946286, EPI_ISL_946292, EPI_ISL_946298, EPI_ISL_946301, EPI_ISL_946302, EPI_ISL_946303, EPI_ISL_946304, EPI_ISL_946318, EPI_ISL_946319, EPI_ISL_946326, EPI_ISL_946328, EPI_ISL_946333, EPI_ISL_946335, EPI_ISL_946338, EPI_ISL_946339, EPI_ISL_946351, EPI_ISL_946356, EPI_ISL_946357, EPI_ISL_946360, EPI_ISL_946361, EPI_ISL_946365, EPI_ISL_946366, EPI_ISL_946367, EPI_ISL_946371, EPI_ISL_946374, EPI_ISL_946375, EPI_ISL_946378, EPI_ISL_946379, EPI_ISL_946380, EPI_ISL_946385, EPI_ISL_946391, EPI_ISL_946397, EPI_ISL_946400, EPI_ISL_946405, EPI_ISL_946407, EPI_ISL_946410, EPI_ISL_946431 |                                                                                                                                                                                  |                                                                            |                                                                                                                                                                                                                                                                                                                                                                                                                                              |
| see above                                                                                                                                                                                                                                                                                                                                                                                                                                                                                                                                                                                                                                                                                                                                                                                                                                                                                                                                                                                                                                                                                                                                                                                                                                                                                                                                                                                                                                                                                                                                                                                                                                                                                                                                                                                                                                                                                                                                                                                                                                                                                                                                                                                                                                                                                                                                                                                                                                                                                                                                                                                                                                                                                                                                                                                                                                                                                                                                                                                                                                                                                                                                                                                                                                                                                                                                                                                                                                                                                                                                                                                                                                                                                                                                                                                                                                                                                                                                                                                                                                                                                                                                                                                                                                                                                                                                                                                                                                                                                                                                                                                                                                                                                                                                      | Lighthouse Lab in Glasgow                                                                                                                                                        | Wellcome Sanger Institute for the COVID-19 Genomics UK (COG-UK) Consortium | Harper VanSteenhouse, Yumi Kasai, David Gray, Carol Clugston, Anna Dominiczak and Alex Alderton, Roberto Amato, Sonia Goncalves, Ewan Harrison, David K. Jackson, Ian Johnston, Dominic Kwiatkowski, Cordelia Langford, John Sillitoe on behalf of the Wellcome Sanger Institute COVID-19 Surveillance Team                                                                                                                                  |
| EPI_ISL_949405                                                                                                                                                                                                                                                                                                                                                                                                                                                                                                                                                                                                                                                                                                                                                                                                                                                                                                                                                                                                                                                                                                                                                                                                                                                                                                                                                                                                                                                                                                                                                                                                                                                                                                                                                                                                                                                                                                                                                                                                                                                                                                                                                                                                                                                                                                                                                                                                                                                                                                                                                                                                                                                                                                                                                                                                                                                                                                                                                                                                                                                                                                                                                                                                                                                                                                                                                                                                                                                                                                                                                                                                                                                                                                                                                                                                                                                                                                                                                                                                                                                                                                                                                                                                                                                                                                                                                                                                                                                                                                                                                                                                                                                                                                                                 | University of Birmingham                                                                                                                                                         | COVID-19 Genomics UK (COG-UK) Consortium                                   | Institute of Microbiology, University of Birmingham: Claire McMurray, Joanne Stockton, Samuel Nicholls, Radoslaw Poplawski, Will Rowe, Josh Quick, Nicholas Loman. University of Birmingham Testing Laboratory: Celina M Whalley, Andrew Bosworth, Charlotte Poxon, Kasun Wanigasooriya, Oliver Pickles, Mike Kidd, Alex Richter, Andrew D Beggs PHE Heartlands Lab: Husam Osman, Andrew Bosworth. Queen Elizabeth Hospital: Anna Casey      |
| EPI_ISL_949543, EPI_ISL_949545, EPI_ISL_949547, EPI_ISL_949551, EPI_ISL_949552, EPI_ISL_949557, EPI_ISL_949558, EPI_ISL_949560, EPI_ISL_949561, EPI_ISL_949562, EPI_ISL_949563, EPI_ISL_949564, EPI_ISL_949565, EPI_ISL_949566, EPI_ISL_949567, EPI_ISL_949568, EPI_ISL_949569, EPI_ISL_949571, EPI_ISL_949572, EPI_ISL_949573, EPI_ISL_949574, EPI_ISL_949575, EPI_ISL_949576, EPI_ISL_949577, EPI_ISL_949578, EPI_ISL_949579, EPI_ISL_949580, EPI_ISL_949582, EPI_ISL_949583, EPI_ISL_949584, EPI_ISL_949585, EPI_ISL_949586, EPI_ISL_949587, EPI_ISL_949589, EPI_ISL_949590, EPI_ISL_949591, EPI_ISL_949592, EPI_ISL_949593, EPI_ISL_949594, EPI_ISL_949595, EPI_ISL_949596, EPI_ISL_949597, EPI_ISL_949598, EPI_ISL_949599, EPI_ISL_949600, EPI_ISL_949601, EPI_ISL_949602, EPI_ISL_949603, EPI_ISL_949604, EPI_ISL_949605, EPI_ISL_949606, EPI_ISL_949607                                                                                                                                                                                                                                                                                                                                                                                                                                                                                                                                                                                                                                                                                                                                                                                                                                                                                                                                                                                                                                                                                                                                                                                                                                                                                                                                                                                                                                                                                                                                                                                                                                                                                                                                                                                                                                                                                                                                                                                                                                                                                                                                                                                                                                                                                                                                                                                                                                                                                                                                                                                                                                                                                                                                                                                                                                                                                                                                                                                                                                                                                                                                                                                                                                                                                                                                                                                                                                                                                                                                                                                                                                                                                                                                                                                                                                                                                 |                                                                                                                                                                                  |                                                                            |                                                                                                                                                                                                                                                                                                                                                                                                                                              |
| see above                                                                                                                                                                                                                                                                                                                                                                                                                                                                                                                                                                                                                                                                                                                                                                                                                                                                                                                                                                                                                                                                                                                                                                                                                                                                                                                                                                                                                                                                                                                                                                                                                                                                                                                                                                                                                                                                                                                                                                                                                                                                                                                                                                                                                                                                                                                                                                                                                                                                                                                                                                                                                                                                                                                                                                                                                                                                                                                                                                                                                                                                                                                                                                                                                                                                                                                                                                                                                                                                                                                                                                                                                                                                                                                                                                                                                                                                                                                                                                                                                                                                                                                                                                                                                                                                                                                                                                                                                                                                                                                                                                                                                                                                                                                                      | Department of Pathology, University of Cambridge                                                                                                                                 | COVID-19 Genomics UK (COG-UK) Consortium                                   | Aminu S. Jahun, Yasmin Chaudhry, Iliana Georgana, Myra Hosmillo, Rhys Izu, Martin D. Curran, Surendra Parmar, Ian Goodfellow                                                                                                                                                                                                                                                                                                                 |
| EPI_ISL_949616, EPI_ISL_949617, EPI_ISL_949619, EPI_ISL_949621, EPI_ISL_949623, EPI_ISL_949625, EPI_ISL_949627                                                                                                                                                                                                                                                                                                                                                                                                                                                                                                                                                                                                                                                                                                                                                                                                                                                                                                                                                                                                                                                                                                                                                                                                                                                                                                                                                                                                                                                                                                                                                                                                                                                                                                                                                                                                                                                                                                                                                                                                                                                                                                                                                                                                                                                                                                                                                                                                                                                                                                                                                                                                                                                                                                                                                                                                                                                                                                                                                                                                                                                                                                                                                                                                                                                                                                                                                                                                                                                                                                                                                                                                                                                                                                                                                                                                                                                                                                                                                                                                                                                                                                                                                                                                                                                                                                                                                                                                                                                                                                                                                                                                                                 | West of Scotland Specialist Virology Centre, NHSGCC / MRC-University of Glasgow Centre for Virus Research                                                                        | COVID-19 Genomics UK (COG-UK) Consortium                                   | Ana da Silva Filipe, Natasha Johnson, Kathy Smollett, Daniel Mair, Stephen Carmichael, Alice Broos, Lily Tong, Jenna Nichols, Kyriaki Nomikou; Sarah McDonald; Richard Orton, Joseph Hughes, Sreenu Vattipally, David L Robertson; Alasdair MacLean, Rory Gunion; Sharif Shaaban, Matthew Holden; Rachel Blacow, Guy Mollat, Kelly Li, James Shepherd, Antonia Ho, Emma Thomson                                                              |
| EPI_ISL_949662, EPI_ISL_949663, EPI_ISL_949664, EPI_ISL_949666, EPI_ISL_949668, EPI_ISL_949669, EPI_ISL_949670, EPI_ISL_949708, EPI_ISL_949710, EPI_ISL_949711, EPI_ISL_949712, EPI_ISL_949723, EPI_ISL_949726, EPI_ISL_949727, EPI_ISL_949728, EPI_ISL_949730, EPI_ISL_949740, EPI_ISL_949742, EPI_ISL_949743, EPI_ISL_949744, EPI_ISL_949745, EPI_ISL_949746                                                                                                                                                                                                                                                                                                                                                                                                                                                                                                                                                                                                                                                                                                                                                                                                                                                                                                                                                                                                                                                                                                                                                                                                                                                                                                                                                                                                                                                                                                                                                                                                                                                                                                                                                                                                                                                                                                                                                                                                                                                                                                                                                                                                                                                                                                                                                                                                                                                                                                                                                                                                                                                                                                                                                                                                                                                                                                                                                                                                                                                                                                                                                                                                                                                                                                                                                                                                                                                                                                                                                                                                                                                                                                                                                                                                                                                                                                                                                                                                                                                                                                                                                                                                                                                                                                                                                                                 |                                                                                                                                                                                  |                                                                            |                                                                                                                                                                                                                                                                                                                                                                                                                                              |
| see above                                                                                                                                                                                                                                                                                                                                                                                                                                                                                                                                                                                                                                                                                                                                                                                                                                                                                                                                                                                                                                                                                                                                                                                                                                                                                                                                                                                                                                                                                                                                                                                                                                                                                                                                                                                                                                                                                                                                                                                                                                                                                                                                                                                                                                                                                                                                                                                                                                                                                                                                                                                                                                                                                                                                                                                                                                                                                                                                                                                                                                                                                                                                                                                                                                                                                                                                                                                                                                                                                                                                                                                                                                                                                                                                                                                                                                                                                                                                                                                                                                                                                                                                                                                                                                                                                                                                                                                                                                                                                                                                                                                                                                                                                                                                      | Liverpool Clinical Laboratories                                                                                                                                                  | COVID-19 Genomics UK (COG-UK) Consortium                                   | Sam Haldenby, Anita Lucacy, Steve Paterson, Julian Hiscox, Alistair Darby, M Almsaud, A Alrezaihi, Muhannad Alruwaili, Stuart D Armstrong, Jones Benjamin, Eleanor G Bentley, Anu Chawla, Jordan J Clark, Angela Cowell, Richard Eccles, Isabel Garcia-Dorival, James Gemmell, Alessandro Gerada, PKF Gilmore, Richard Gregory, Ximeng Han, Catherine Hartley, Margaret Hughes, Miren Iturriza-Gomara, James Johnson, L Luu, Jenifer Manson, |

EPI\_ISL\_949795, EPI\_ISL\_949796, EPI\_ISL\_949797, EPI\_ISL\_949798, EPI\_ISL\_949799, EPI\_ISL\_949800, EPI\_ISL\_949801, EPI\_ISL\_949803, EPI\_ISL\_949804, EPI\_ISL\_949805, EPI\_ISL\_949806, EPI\_ISL\_949807, EPI\_ISL\_949808, EPI\_ISL\_949809, EPI\_ISL\_949810, EPI\_ISL\_949866, EPI\_ISL\_949915, EPI\_ISL\_949916, EPI\_ISL\_949918, EPI\_ISL\_949921, EPI\_ISL\_949922, EPI\_ISL\_949923, EPI\_ISL\_949930, EPI\_ISL\_949932, EPI\_ISL\_949933, EPI\_ISL\_949935, EPI\_ISL\_949936, EPI\_ISL\_949940, EPI\_ISL\_949944, EPI\_ISL\_949947, EPI\_ISL\_949949, EPI\_ISL\_949950, EPI\_ISL\_949953, EPI\_ISL\_949957, EPI\_ISL\_949961, EPI\_ISL\_950173, EPI\_ISL\_950177, EPI\_ISL\_950195, EPI\_ISL\_950198, EPI\_ISL\_950200, EPI\_ISL\_950201, EPI\_ISL\_950202, EPI\_ISL\_950203, EPI\_ISL\_950204, EPI\_ISL\_950205, EPI\_ISL\_950206, EPI\_ISL\_950207, EPI\_ISL\_950208, EPI\_ISL\_950209, EPI\_ISL\_950210

|           |                                                                                                                                  |                                          |                                                                                                                                                                                                                                                                                                                                |
|-----------|----------------------------------------------------------------------------------------------------------------------------------|------------------------------------------|--------------------------------------------------------------------------------------------------------------------------------------------------------------------------------------------------------------------------------------------------------------------------------------------------------------------------------|
| see above | University College London, Great Ormond Street Hospital for Children NHS Foundation Trust, Imperial College Healthcare NHS Trust | COVID-19 Genomics UK (COG-UK) Consortium | Sergi Castellano, Rachel Williams, Mark Kristiansen, Paola Resende Silva, Sunando Roy, Tony Brooks, Helena Tutili, Paola Niola, Patricia Dyal, Charlotte Williams, Leysa Forrest, Yasmin Panchbhaya, Jacqueline Findlay, Samuel Weeks, Julianne Brown, Kathryn Harris, Paul Randell, James Price, Alison Holmes, Judith Breuer |
|-----------|----------------------------------------------------------------------------------------------------------------------------------|------------------------------------------|--------------------------------------------------------------------------------------------------------------------------------------------------------------------------------------------------------------------------------------------------------------------------------------------------------------------------------|

EPI\_ISL\_950402, EPI\_ISL\_950403, EPI\_ISL\_950404, EPI\_ISL\_950405, EPI\_ISL\_950406, EPI\_ISL\_950407, EPI\_ISL\_950408, EPI\_ISL\_950409, EPI\_ISL\_950410, EPI\_ISL\_950411, EPI\_ISL\_950412, EPI\_ISL\_950413, EPI\_ISL\_950414, EPI\_ISL\_950415, EPI\_ISL\_950425, EPI\_ISL\_950426, EPI\_ISL\_950427

|           |                                                                                                                                                         |                                          |                                                                                                                                                                                                                                                                                                                                                         |
|-----------|---------------------------------------------------------------------------------------------------------------------------------------------------------|------------------------------------------|---------------------------------------------------------------------------------------------------------------------------------------------------------------------------------------------------------------------------------------------------------------------------------------------------------------------------------------------------------|
| see above | Northumbria University / South Tees Hospitals NHS Foundation Trust / North Cumbria Integrated Care NHS Foundation Trust / North Tees and Hartlepool NHS | COVID-19 Genomics UK (COG-UK) Consortium | Darren L Smith, Andrew Nelson, Matthew Bashton, Greg R Young, Joshua Loh, John Allan, Mohammad A Tariq, Giles S Holt, Gary Black, Wen C Yew, Lynn Dover, Paul Baker, Steve Liggett, Sarah Essex, Jane Greenaway, Debra Padgett, Clive Graham, Garren Scott, Edward Barton, Emma Swindells, Brendan Payne, Jennifer Collins, Yusri Taha, Gary Eltringham |
|-----------|---------------------------------------------------------------------------------------------------------------------------------------------------------|------------------------------------------|---------------------------------------------------------------------------------------------------------------------------------------------------------------------------------------------------------------------------------------------------------------------------------------------------------------------------------------------------------|

Foundation Trust / Newcastle Hospitals NHS Foundation Trust

EP1\_ISL\_950640, EP1\_ISL\_950641, EP1\_ISL\_950640, EP1\_ISL\_950643, EP1\_ISL\_950650, EP1\_ISL\_950651, EP1\_ISL\_950652, EP1\_ISL\_950653, EP1\_ISL\_950654, EP1\_ISL\_950655, EP1\_ISL\_950656, EP1\_ISL\_950657, EP1\_ISL\_950658, EP1\_ISL\_950659, EP1\_ISL\_950660, EP1\_ISL\_950661, EP1\_ISL\_950662

see above  
Queens Medical Centre, Clinical Microbiology Department /  
DeepSec Nottingham  
COVID-19 Genomics UK (COG-UK) Consortium  
Gemma Clark, Wendy Smith, Marjoline Khamis, Vicki M Fleming, Michelle M Lister, Hannah Howson-Jewell, Jonathan Ball, Patrick McQuill, Joseph Chappell, Theodoros Soteridis, Nadine Holmes, Matthew Carlisle, Christopher Moore, Fei Sang, Johnny Debebe, Victoria Wright, Matthew Loose

EPI\_ISL\_951783, EPI\_ISL\_951907, EPI\_ISL\_951975, EPI\_ISL\_951976, EPI\_ISL\_951981, EPI\_ISL\_951978, EPI\_ISL\_951980, EPI\_ISL\_951981, EPI\_ISL\_951982, EPI\_ISL\_951983, EPI\_ISL\_951984, EPI\_ISL\_951985, EPI\_ISL\_952046, EPI\_ISL\_952047, EPI\_ISL\_952048, EPI\_ISL\_952049, EPI\_ISL\_952050, EPI\_ISL\_952052, EPI\_ISL\_952053, EPI\_ISL\_952054, EPI\_ISL\_952055, EPI\_ISL\_952056, EPI\_ISL\_952057, EPI\_ISL\_952058, EPI\_ISL\_952059, EPI\_ISL\_952060

|           |                                                                                          |                                                                           |                                                                                                                                                                                                                                                                                                                                                                          |
|-----------|------------------------------------------------------------------------------------------|---------------------------------------------------------------------------|--------------------------------------------------------------------------------------------------------------------------------------------------------------------------------------------------------------------------------------------------------------------------------------------------------------------------------------------------------------------------|
| see above | Originating lab: Wales Specialist Virology Centre Sequencing lab: Pathogen Genomics Unit | Public Health Wales Microbiology Cardiff Wales Specialist Virology Centre | Catherine Moore, Johnathan Evans, Laura Gifford, Malorie Perry, Simon Cottrell, Angela Marchbank, Alec Birchley, Alexander Adams, Amy Gaskin, Bree Gatica-Wilcox, Jason Coombes, Joel Southgate, Lauren Gilbert, Lee Graham, Nicole Pacchiarini, Sara Kumziene-Summerhayes, Sarah Taylor, Sophie Jones, Sara Rey, Matthew Bull, Joanne Watkins, Sally Corden, Tom Connor |
|-----------|------------------------------------------------------------------------------------------|---------------------------------------------------------------------------|--------------------------------------------------------------------------------------------------------------------------------------------------------------------------------------------------------------------------------------------------------------------------------------------------------------------------------------------------------------------------|

EPI\_ISL\_952957, EPI\_ISL\_952959, EPI\_ISL\_952972, EPI\_ISL\_952986, EPI\_ISL\_952988, EPI\_ISL\_952991, EPI\_ISL\_953003, EPI\_ISL\_953006, EPI\_ISL\_953012, EPI\_ISL\_953013, EPI\_ISL\_953017

|           |                                                                                                                                                                                  |                                          |                                                                                                                                                                                                                                                                              |
|-----------|----------------------------------------------------------------------------------------------------------------------------------------------------------------------------------|------------------------------------------|------------------------------------------------------------------------------------------------------------------------------------------------------------------------------------------------------------------------------------------------------------------------------|
| see above | Virology Department, Sheffield Teaching Hospitals NHS Foundation Trust/Department of Infection, Immunity and Cardiovascular Disease, The Medical School, University of Sheffield | COVID-19 Genomics UK (COG-UK) Consortium | Thushan de Silva, Matthew Parker, Nikki Smith, Adri Angyal, Rebecca Brown, Luke Green, Rachel Tucker, Paul Parsons, Danielle Groves, Katie Johnson, Laura Carrilero, Alex Keeley, Dave Partridge, Matthew Wyles, Benjamin Lindsey, Mehmet Yavuz, Mohammad Raza, Cariad Evans |
|-----------|----------------------------------------------------------------------------------------------------------------------------------------------------------------------------------|------------------------------------------|------------------------------------------------------------------------------------------------------------------------------------------------------------------------------------------------------------------------------------------------------------------------------|

EPI\_ISL\_953240, EPI\_ISL\_953245, EPI\_ISL\_953248, EPI\_ISL\_953249, EPI\_ISL\_953250, EPI\_ISL\_953251, EPI\_ISL\_953252, EPI\_ISL\_953253, EPI\_ISL\_953254, EPI\_ISL\_953255, EPI\_ISL\_953256, EPI\_ISL\_953257, EPI\_ISL\_953258, EPI\_ISL\_953259, EPI\_ISL\_953260, EPI\_ISL\_953261, EPI\_ISL\_953262, EPI\_ISL\_953263, EPI\_ISL\_953264, EPI\_ISL\_953265, EPI\_ISL\_953266, EPI\_ISL\_953267, EPI\_ISL\_953268, EPI\_ISL\_953269, EPI\_ISL\_953270, EPI\_ISL\_953271, EPI\_ISL\_953272, EPI\_ISL\_953273, EPI\_ISL\_953274, EPI\_ISL\_953275, EPI\_ISL\_953276, EPI\_ISL\_953277, EPI\_ISL\_953278, EPI\_ISL\_953279, EPI\_ISL\_953280, EPI\_ISL\_953281, EPI\_ISL\_953282, EPI\_ISL\_953283, EPI\_ISL\_953284, EPI\_ISL\_953285

|           |                                                                    |                                          |                                                                                         |
|-----------|--------------------------------------------------------------------|------------------------------------------|-----------------------------------------------------------------------------------------|
| see above | Bioinformatics and Biostatistics Lab, Advanced Sequencing Facility | COVID-19 Genomics UK (COG-UK) Consortium | Aengus Stewart,Jerome Nicod,Chelsea Sawyer,Laura Cubitt,Harshil Patel,Margaret Crawford |
|-----------|--------------------------------------------------------------------|------------------------------------------|-----------------------------------------------------------------------------------------|

[illegible]

|           |                                 |                                                                            |                                                                                                                                                                                                                                                                                                   |
|-----------|---------------------------------|----------------------------------------------------------------------------|---------------------------------------------------------------------------------------------------------------------------------------------------------------------------------------------------------------------------------------------------------------------------------------------------|
| see above | Lighthouse Lab in Alderley Park | Wellcome Sanger Institute for the COVID-19 Genomics UK (COG-UK) Consortium | Jacquelyn Wynn, Mairead Hyland, The Lighthouse Lab in Alderley Park and Alex Alderton, Roberto Amato, Sonia Gonçalves, Ewan Harrison, David K. Jackson, Ian Johnston, Dominic Kwiatkowski, Cordelia Langford, John Sillitoe on behalf of the Wellcome Sanger Institute COVID-19 Surveillance Team |
|-----------|---------------------------------|----------------------------------------------------------------------------|---------------------------------------------------------------------------------------------------------------------------------------------------------------------------------------------------------------------------------------------------------------------------------------------------|

[illegible]

|           |                                 |                                                                            |                                                                                                                                                                                                                                                                   |
|-----------|---------------------------------|----------------------------------------------------------------------------|-------------------------------------------------------------------------------------------------------------------------------------------------------------------------------------------------------------------------------------------------------------------|
| see above | Lighthouse Lab in Milton Keynes | Wellcome Sanger Institute for the COVID-19 Genomics UK (COG-UK) Consortium | The Lighthouse Lab in Milton Keynes and Alex Alderton, Roberto Amato, Sonia Goncalves, Ewan Harrison, David K. Jackson, Ian Johnston, Dominic Kwiatkowski, Cordelia Langford, John Sillitoe on behalf of the Wellcome Sanger Institute COVID-19 Surveillance Team |
|-----------|---------------------------------|----------------------------------------------------------------------------|-------------------------------------------------------------------------------------------------------------------------------------------------------------------------------------------------------------------------------------------------------------------|

|                                |                           |                                                                            |                                                                                                                                                                                                                                                                                                        |
|--------------------------------|---------------------------|----------------------------------------------------------------------------|--------------------------------------------------------------------------------------------------------------------------------------------------------------------------------------------------------------------------------------------------------------------------------------------------------|
| EPI_ISL_957090, EPI_ISL_957094 | Lighthouse Lab in Glasgow | Wellcome Sanger Institute for the COVID-19 Genomics UK (COG-UK) Consortium | Harper VanSteenhouse, Yumi Kasai, David Gray, Carol Clugston, Anna Dominiczak and Alex Alderton, Roberto Amato, Sonia Goncalves, Ewan Harrison, David K. Jackson, Ian Johnston, Dominic Kwiatkowski, Cordelia Langford, John Sillitoe on behalf of the Wellcome Sanger Institute COVID-19 Surveillance |
|--------------------------------|---------------------------|----------------------------------------------------------------------------|--------------------------------------------------------------------------------------------------------------------------------------------------------------------------------------------------------------------------------------------------------------------------------------------------------|

team

EPI\_ISL\_957096, EPI\_ISL\_957098, EPI\_ISL\_957100, EPI\_ISL\_957106, EPI\_ISL\_957108, EPI\_ISL\_957109, EPI\_ISL\_957111, EPI\_ISL\_957112, EPI\_ISL\_957113, EPI\_ISL\_957116, EPI\_ISL\_957119, EPI\_ISL\_957120, EPI\_ISL\_957123, EPI\_ISL\_957125, EPI\_ISL\_957126, EPI\_ISL\_957127, EPI\_ISL\_957128, EPI\_ISL\_957129, EPI\_ISL\_957131, EPI\_ISL\_957132, EPI\_ISL\_957134, EPI\_ISL\_957135, EPI\_ISL\_957136, EPI\_ISL\_957137, EPI\_ISL\_957138, EPI\_ISL\_957139, EPI\_ISL\_957142, EPI\_ISL\_957143, EPI\_ISL\_957144, EPI\_ISL\_957145, EPI\_ISL\_957146, EPI\_ISL\_957147, EPI\_ISL\_957148, EPI\_ISL\_957152, EPI\_ISL\_957153, EPI\_ISL\_957156, EPI\_ISL\_957159, EPI\_ISL\_957161, EPI\_ISL\_957163, EPI\_ISL\_957164, EPI\_ISL\_957167, EPI\_ISL\_957169, EPI\_ISL\_957173, EPI\_ISL\_957174, EPI\_ISL\_957175, EPI\_ISL\_957178, EPI\_ISL\_957179, EPI\_ISL\_957181, EPI\_ISL\_957182, EPI\_ISL\_957184, EPI\_ISL\_957185, EPI\_ISL\_957186, EPI\_ISL\_957189, EPI\_ISL\_957192, EPI\_ISL\_957193, EPI\_ISL\_957195, EPI\_ISL\_957196, EPI\_ISL\_957197, EPI\_ISL\_957199, EPI\_ISL\_957202, EPI\_ISL\_957203, EPI\_ISL\_957204, EPI\_ISL\_957207, EPI\_ISL\_957209, EPI\_ISL\_957213, EPI\_ISL\_957214, EPI\_ISL\_957217, EPI\_ISL\_957218, EPI\_ISL\_957220, EPI\_ISL\_957221, EPI\_ISL\_957222, EPI\_ISL\_957226, EPI\_ISL\_957228, EPI\_ISL\_957230, EPI\_ISL\_957232, EPI\_ISL\_957233, EPI\_ISL\_957234, EPI\_ISL\_957235, EPI\_ISL\_957236, EPI\_ISL\_957238, EPI\_ISL\_957240, EPI\_ISL\_957241, EPI\_ISL\_957244, EPI\_ISL\_957247, EPI\_ISL\_957249, EPI\_ISL\_957251, EPI\_ISL\_957252, EPI\_ISL\_957258, EPI\_ISL\_957261, EPI\_ISL\_957264, EPI\_ISL\_957265, EPI\_ISL\_957267, EPI\_ISL\_957269, EPI\_ISL\_957273, EPI\_ISL\_957274, EPI\_ISL\_957278, EPI\_ISL\_957280, EPI\_ISL\_957281, EPI\_ISL\_957282, EPI\_ISL\_957284, EPI\_ISL\_957288, EPI\_ISL\_957290, EPI\_ISL\_957293, EPI\_ISL\_957295, EPI\_ISL\_957296, EPI\_ISL\_957298, EPI\_ISL\_957300, EPI\_ISL\_957301,

[illegible]

[illegible]



[illegible]

[illegible]

[illegible]

[illegible]

[illegible]

|                                                                                                                                                                                                                                                                                                                                                                                                                                                                                                                                                                                                                                                                                                                                                                                                                                                                                                                                                                                                                                                                                                                                                                                                                                                                                                                                                                                                                                                                                                                                                                                                                                                                                                                                                                                                                                                                                                                                                                                                                                                                                                                                                                                                                                                                                                                                                                                                                                                                                                                                                                                                                                                                                                                                                                                                                                                                                                                                                                                                                                                                                                                                                                                                                                                                                                                                                                                                                                                                                                                                                                                                                                                                                                                                                                                                                                                                                                                                                                                                                                                                                                                                                                                                                                                                                                                                                                                                                                                                                                                                                                                                                                                                                                                                                                                                                                                                                                                                                                                                                                                                                                                                                                                                                                                                                                                                                                                                                                                                                                                                                                                                                                                                                                                                                                                                                                                                                                                                                                                                                                                                                                                                                                                                                                                                                                                                                                                                                                                                                                                                                                                                                                                                                                                                                                                                                                                                                                                                                                                |                                 |                                                                            |                                                                                                                                                                                                                                                                                                                                                                                                     |
|--------------------------------------------------------------------------------------------------------------------------------------------------------------------------------------------------------------------------------------------------------------------------------------------------------------------------------------------------------------------------------------------------------------------------------------------------------------------------------------------------------------------------------------------------------------------------------------------------------------------------------------------------------------------------------------------------------------------------------------------------------------------------------------------------------------------------------------------------------------------------------------------------------------------------------------------------------------------------------------------------------------------------------------------------------------------------------------------------------------------------------------------------------------------------------------------------------------------------------------------------------------------------------------------------------------------------------------------------------------------------------------------------------------------------------------------------------------------------------------------------------------------------------------------------------------------------------------------------------------------------------------------------------------------------------------------------------------------------------------------------------------------------------------------------------------------------------------------------------------------------------------------------------------------------------------------------------------------------------------------------------------------------------------------------------------------------------------------------------------------------------------------------------------------------------------------------------------------------------------------------------------------------------------------------------------------------------------------------------------------------------------------------------------------------------------------------------------------------------------------------------------------------------------------------------------------------------------------------------------------------------------------------------------------------------------------------------------------------------------------------------------------------------------------------------------------------------------------------------------------------------------------------------------------------------------------------------------------------------------------------------------------------------------------------------------------------------------------------------------------------------------------------------------------------------------------------------------------------------------------------------------------------------------------------------------------------------------------------------------------------------------------------------------------------------------------------------------------------------------------------------------------------------------------------------------------------------------------------------------------------------------------------------------------------------------------------------------------------------------------------------------------------------------------------------------------------------------------------------------------------------------------------------------------------------------------------------------------------------------------------------------------------------------------------------------------------------------------------------------------------------------------------------------------------------------------------------------------------------------------------------------------------------------------------------------------------------------------------------------------------------------------------------------------------------------------------------------------------------------------------------------------------------------------------------------------------------------------------------------------------------------------------------------------------------------------------------------------------------------------------------------------------------------------------------------------------------------------------------------------------------------------------------------------------------------------------------------------------------------------------------------------------------------------------------------------------------------------------------------------------------------------------------------------------------------------------------------------------------------------------------------------------------------------------------------------------------------------------------------------------------------------------------------------------------------------------------------------------------------------------------------------------------------------------------------------------------------------------------------------------------------------------------------------------------------------------------------------------------------------------------------------------------------------------------------------------------------------------------------------------------------------------------------------------------------------------------------------------------------------------------------------------------------------------------------------------------------------------------------------------------------------------------------------------------------------------------------------------------------------------------------------------------------------------------------------------------------------------------------------------------------------------------------------------------------------------------------------------------------------------------------------------------------------------------------------------------------------------------------------------------------------------------------------------------------------------------------------------------------------------------------------------------------------------------------------------------------------------------------------------------------------------------------------------------------------------------------------------------|---------------------------------|----------------------------------------------------------------------------|-----------------------------------------------------------------------------------------------------------------------------------------------------------------------------------------------------------------------------------------------------------------------------------------------------------------------------------------------------------------------------------------------------|
| see above                                                                                                                                                                                                                                                                                                                                                                                                                                                                                                                                                                                                                                                                                                                                                                                                                                                                                                                                                                                                                                                                                                                                                                                                                                                                                                                                                                                                                                                                                                                                                                                                                                                                                                                                                                                                                                                                                                                                                                                                                                                                                                                                                                                                                                                                                                                                                                                                                                                                                                                                                                                                                                                                                                                                                                                                                                                                                                                                                                                                                                                                                                                                                                                                                                                                                                                                                                                                                                                                                                                                                                                                                                                                                                                                                                                                                                                                                                                                                                                                                                                                                                                                                                                                                                                                                                                                                                                                                                                                                                                                                                                                                                                                                                                                                                                                                                                                                                                                                                                                                                                                                                                                                                                                                                                                                                                                                                                                                                                                                                                                                                                                                                                                                                                                                                                                                                                                                                                                                                                                                                                                                                                                                                                                                                                                                                                                                                                                                                                                                                                                                                                                                                                                                                                                                                                                                                                                                                                                                                      | Lighthouse Lab in Milton Keynes | Wellcome Sanger Institute for the COVID-19 Genomics UK (COG-UK) Consortium | The Lighthouse Lab in Milton Keynes and Alex Alderton, Roberto Amato, Sonia Goncalves, Ewan Harrison, David K. Jackson, Ian Johnston, Dominic Kwiatkowski, Cordelia Langford, John Sillitoe on behalf of the Wellcome Sanger Institute COVID-19 Surveillance Team                                                                                                                                   |
| EPI_ISL_986039                                                                                                                                                                                                                                                                                                                                                                                                                                                                                                                                                                                                                                                                                                                                                                                                                                                                                                                                                                                                                                                                                                                                                                                                                                                                                                                                                                                                                                                                                                                                                                                                                                                                                                                                                                                                                                                                                                                                                                                                                                                                                                                                                                                                                                                                                                                                                                                                                                                                                                                                                                                                                                                                                                                                                                                                                                                                                                                                                                                                                                                                                                                                                                                                                                                                                                                                                                                                                                                                                                                                                                                                                                                                                                                                                                                                                                                                                                                                                                                                                                                                                                                                                                                                                                                                                                                                                                                                                                                                                                                                                                                                                                                                                                                                                                                                                                                                                                                                                                                                                                                                                                                                                                                                                                                                                                                                                                                                                                                                                                                                                                                                                                                                                                                                                                                                                                                                                                                                                                                                                                                                                                                                                                                                                                                                                                                                                                                                                                                                                                                                                                                                                                                                                                                                                                                                                                                                                                                                                                 | Lighthouse Lab in Milton Keynes | Wellcome Sanger Institute for the COVID-19 Genomics UK (COG-UK) Consortium | The Lighthouse Lab in Milton Keynes and Alex Alderton, Roberto Amato, Sonia Goncalves, Ewan Harrison, David K. Jackson, Ian Johnston, Dominic Kwiatkowski, Cordelia Langford, John Sillitoe on behalf of the Wellcome Sanger Institute COVID-19 Surveillance Team ( <a href="http://www.sanger.ac.uk/covid-team">http://www.sanger.ac.uk/covid-team</a> )                                           |
| EPI_ISL_987005, EPI_ISL_987104                                                                                                                                                                                                                                                                                                                                                                                                                                                                                                                                                                                                                                                                                                                                                                                                                                                                                                                                                                                                                                                                                                                                                                                                                                                                                                                                                                                                                                                                                                                                                                                                                                                                                                                                                                                                                                                                                                                                                                                                                                                                                                                                                                                                                                                                                                                                                                                                                                                                                                                                                                                                                                                                                                                                                                                                                                                                                                                                                                                                                                                                                                                                                                                                                                                                                                                                                                                                                                                                                                                                                                                                                                                                                                                                                                                                                                                                                                                                                                                                                                                                                                                                                                                                                                                                                                                                                                                                                                                                                                                                                                                                                                                                                                                                                                                                                                                                                                                                                                                                                                                                                                                                                                                                                                                                                                                                                                                                                                                                                                                                                                                                                                                                                                                                                                                                                                                                                                                                                                                                                                                                                                                                                                                                                                                                                                                                                                                                                                                                                                                                                                                                                                                                                                                                                                                                                                                                                                                                                 | Lighthouse Lab in Alderley Park | Wellcome Sanger Institute for the COVID-19 Genomics UK (COG-UK) Consortium | Jacquelyn Wynn, Mairead Hyland, The Lighthouse Lab in Alderley Park and Alex Alderton, Roberto Amato, Sonia Goncalves, Ewan Harrison, David K. Jackson, Ian Johnston, Dominic Kwiatkowski, Cordelia Langford, John Sillitoe on behalf of the Wellcome Sanger Institute COVID-19 Surveillance Team ( <a href="http://www.sanger.ac.uk/covid-team">http://www.sanger.ac.uk/covid-team</a> )           |
| EPI_ISL_987638, EPI_ISL_987639, EPI_ISL_987640, EPI_ISL_987641, EPI_ISL_987642, EPI_ISL_987646, EPI_ISL_987648, EPI_ISL_987649, EPI_ISL_987650, EPI_ISL_987653, EPI_ISL_987655, EPI_ISL_987656, EPI_ISL_987657, EPI_ISL_987659, EPI_ISL_987660, EPI_ISL_987662, EPI_ISL_987663, EPI_ISL_987664, EPI_ISL_987666, EPI_ISL_987667, EPI_ISL_987668, EPI_ISL_987670, EPI_ISL_987672, EPI_ISL_987673, EPI_ISL_987674, EPI_ISL_987680, EPI_ISL_987681, EPI_ISL_987682, EPI_ISL_987683, EPI_ISL_987684, EPI_ISL_987686, EPI_ISL_987688, EPI_ISL_987689, EPI_ISL_987691, EPI_ISL_987694, EPI_ISL_987696, EPI_ISL_987698, EPI_ISL_987699, EPI_ISL_987700, EPI_ISL_987701, EPI_ISL_987702, EPI_ISL_987704, EPI_ISL_987705, EPI_ISL_987707, EPI_ISL_987709, EPI_ISL_987710, EPI_ISL_987711, EPI_ISL_987712, EPI_ISL_987713, EPI_ISL_987714, EPI_ISL_987715, EPI_ISL_987716, EPI_ISL_987717, EPI_ISL_987718, EPI_ISL_987720, EPI_ISL_987721, EPI_ISL_987722, EPI_ISL_987725, EPI_ISL_987728, EPI_ISL_987729, EPI_ISL_987730, EPI_ISL_987731, EPI_ISL_987732, EPI_ISL_987733, EPI_ISL_987735, EPI_ISL_987736, EPI_ISL_987738, EPI_ISL_987739, EPI_ISL_987741, EPI_ISL_987742, EPI_ISL_987743, EPI_ISL_987744, EPI_ISL_987745, EPI_ISL_987746, EPI_ISL_987748, EPI_ISL_987750, EPI_ISL_987755, EPI_ISL_987757, EPI_ISL_987761, EPI_ISL_987762, EPI_ISL_987763, EPI_ISL_987764, EPI_ISL_987765, EPI_ISL_987767, EPI_ISL_987768, EPI_ISL_987769, EPI_ISL_987770, EPI_ISL_987771, EPI_ISL_987772, EPI_ISL_987773, EPI_ISL_987775, EPI_ISL_987778, EPI_ISL_987779, EPI_ISL_987782, EPI_ISL_987785, EPI_ISL_987786, EPI_ISL_987788, EPI_ISL_987790, EPI_ISL_987791, EPI_ISL_987795, EPI_ISL_987802, EPI_ISL_987804, EPI_ISL_987806, EPI_ISL_987807, EPI_ISL_987811, EPI_ISL_987812, EPI_ISL_987814, EPI_ISL_987815, EPI_ISL_987816, EPI_ISL_987818, EPI_ISL_987819, EPI_ISL_987822, EPI_ISL_987824, EPI_ISL_987826, EPI_ISL_987827, EPI_ISL_987829, EPI_ISL_987831, EPI_ISL_987836, EPI_ISL_987837, EPI_ISL_987838, EPI_ISL_987841, EPI_ISL_987842, EPI_ISL_987845, EPI_ISL_987846, EPI_ISL_987848, EPI_ISL_987849, EPI_ISL_987851, EPI_ISL_987852, EPI_ISL_987854, EPI_ISL_987855, EPI_ISL_987857, EPI_ISL_987858, EPI_ISL_987859, EPI_ISL_987860, EPI_ISL_987861, EPI_ISL_987862, EPI_ISL_987863, EPI_ISL_987865, EPI_ISL_987866, EPI_ISL_987868, EPI_ISL_987869, EPI_ISL_987870, EPI_ISL_987873, EPI_ISL_987874, EPI_ISL_987876, EPI_ISL_987878, EPI_ISL_987879, EPI_ISL_987883, EPI_ISL_987884, EPI_ISL_987885, EPI_ISL_987886, EPI_ISL_987888, EPI_ISL_987889, EPI_ISL_987890, EPI_ISL_987901, EPI_ISL_987902, EPI_ISL_987903, EPI_ISL_987905, EPI_ISL_987907, EPI_ISL_987909, EPI_ISL_987910, EPI_ISL_987912, EPI_ISL_987913, EPI_ISL_987914, EPI_ISL_987915, EPI_ISL_987917, EPI_ISL_987919, EPI_ISL_987920, EPI_ISL_987923, EPI_ISL_987924, EPI_ISL_987927, EPI_ISL_987938, EPI_ISL_987939, EPI_ISL_987940, EPI_ISL_987941, EPI_ISL_987942, EPI_ISL_987943, EPI_ISL_987946, EPI_ISL_987947, EPI_ISL_987949, EPI_ISL_987950, EPI_ISL_987951, EPI_ISL_987952, EPI_ISL_987954, EPI_ISL_987955, EPI_ISL_987956, EPI_ISL_987957, EPI_ISL_987959, EPI_ISL_987961, EPI_ISL_987963, EPI_ISL_987965, EPI_ISL_987966, EPI_ISL_987967, EPI_ISL_987968, EPI_ISL_987969, EPI_ISL_987970, EPI_ISL_987971, EPI_ISL_987972, EPI_ISL_987973, EPI_ISL_987974, EPI_ISL_987975, EPI_ISL_987977, EPI_ISL_987979, EPI_ISL_987981, EPI_ISL_987984, EPI_ISL_987985, EPI_ISL_987986, EPI_ISL_987987, EPI_ISL_987988, EPI_ISL_987990, EPI_ISL_987991, EPI_ISL_987992, EPI_ISL_987994, EPI_ISL_987995, EPI_ISL_987996, EPI_ISL_987997, EPI_ISL_988001, EPI_ISL_988002, EPI_ISL_988004, EPI_ISL_988005, EPI_ISL_988006, EPI_ISL_988008, EPI_ISL_988010, EPI_ISL_988257                                                                                                                                                                                                                                                                                                                                                                                                                                                                                                                                                                                                                                                                                                                                                                                                                                                                                                                                                                                                                                                                                                                                                                                                                                                                                                                                                                                                                                                                                                                                                                                                                                                                                                                                                                                                                                                                                                                                                                                                                                                                                                                                                                                                                                                                                                                                                                                                                                                                                                                                                                                                                                                                                                                                                                                                                                                                                                                                                                                                                                                                                                                                                                                                                                                 |                                 |                                                                            |                                                                                                                                                                                                                                                                                                                                                                                                     |
| see above                                                                                                                                                                                                                                                                                                                                                                                                                                                                                                                                                                                                                                                                                                                                                                                                                                                                                                                                                                                                                                                                                                                                                                                                                                                                                                                                                                                                                                                                                                                                                                                                                                                                                                                                                                                                                                                                                                                                                                                                                                                                                                                                                                                                                                                                                                                                                                                                                                                                                                                                                                                                                                                                                                                                                                                                                                                                                                                                                                                                                                                                                                                                                                                                                                                                                                                                                                                                                                                                                                                                                                                                                                                                                                                                                                                                                                                                                                                                                                                                                                                                                                                                                                                                                                                                                                                                                                                                                                                                                                                                                                                                                                                                                                                                                                                                                                                                                                                                                                                                                                                                                                                                                                                                                                                                                                                                                                                                                                                                                                                                                                                                                                                                                                                                                                                                                                                                                                                                                                                                                                                                                                                                                                                                                                                                                                                                                                                                                                                                                                                                                                                                                                                                                                                                                                                                                                                                                                                                                                      | Lighthouse Lab in Cambridge     | Wellcome Sanger Institute for the COVID-19 Genomics UK (COG-UK) Consortium | Rob Howes, The Lighthouse Lab in Cambridge and Alex Alderton, Roberto Amato, Sonia Goncalves, Ewan Harrison, David K. Jackson, Ian Johnston, Dominic Kwiatkowski, Cordelia Langford, John Sillitoe on behalf of the Wellcome Sanger Institute COVID-19 Surveillance Team ( <a href="http://www.sanger.ac.uk/covid-team">http://www.sanger.ac.uk/covid-team</a> )                                    |
| EPI_ISL_988486, EPI_ISL_988495, EPI_ISL_988504, EPI_ISL_988515, EPI_ISL_988516, EPI_ISL_988517, EPI_ISL_988537, EPI_ISL_988538, EPI_ISL_988552, EPI_ISL_988554, EPI_ISL_988555, EPI_ISL_988558, EPI_ISL_988564, EPI_ISL_988576, EPI_ISL_988589, EPI_ISL_988592, EPI_ISL_988600, EPI_ISL_988604, EPI_ISL_988623, EPI_ISL_988631, EPI_ISL_988640, EPI_ISL_988646, EPI_ISL_988651, EPI_ISL_988685                                                                                                                                                                                                                                                                                                                                                                                                                                                                                                                                                                                                                                                                                                                                                                                                                                                                                                                                                                                                                                                                                                                                                                                                                                                                                                                                                                                                                                                                                                                                                                                                                                                                                                                                                                                                                                                                                                                                                                                                                                                                                                                                                                                                                                                                                                                                                                                                                                                                                                                                                                                                                                                                                                                                                                                                                                                                                                                                                                                                                                                                                                                                                                                                                                                                                                                                                                                                                                                                                                                                                                                                                                                                                                                                                                                                                                                                                                                                                                                                                                                                                                                                                                                                                                                                                                                                                                                                                                                                                                                                                                                                                                                                                                                                                                                                                                                                                                                                                                                                                                                                                                                                                                                                                                                                                                                                                                                                                                                                                                                                                                                                                                                                                                                                                                                                                                                                                                                                                                                                                                                                                                                                                                                                                                                                                                                                                                                                                                                                                                                                                                                 |                                 |                                                                            |                                                                                                                                                                                                                                                                                                                                                                                                     |
| see above                                                                                                                                                                                                                                                                                                                                                                                                                                                                                                                                                                                                                                                                                                                                                                                                                                                                                                                                                                                                                                                                                                                                                                                                                                                                                                                                                                                                                                                                                                                                                                                                                                                                                                                                                                                                                                                                                                                                                                                                                                                                                                                                                                                                                                                                                                                                                                                                                                                                                                                                                                                                                                                                                                                                                                                                                                                                                                                                                                                                                                                                                                                                                                                                                                                                                                                                                                                                                                                                                                                                                                                                                                                                                                                                                                                                                                                                                                                                                                                                                                                                                                                                                                                                                                                                                                                                                                                                                                                                                                                                                                                                                                                                                                                                                                                                                                                                                                                                                                                                                                                                                                                                                                                                                                                                                                                                                                                                                                                                                                                                                                                                                                                                                                                                                                                                                                                                                                                                                                                                                                                                                                                                                                                                                                                                                                                                                                                                                                                                                                                                                                                                                                                                                                                                                                                                                                                                                                                                                                      | Lighthouse Lab in Milton Keynes | Wellcome Sanger Institute for the COVID-19 Genomics UK (COG-UK) Consortium | The Lighthouse Lab in Milton Keynes and Alex Alderton, Roberto Amato, Sonia Goncalves, Ewan Harrison, David K. Jackson, Ian Johnston, Dominic Kwiatkowski, Cordelia Langford, John Sillitoe on behalf of the Wellcome Sanger Institute COVID-19 Surveillance Team ( <a href="http://www.sanger.ac.uk/covid-team">http://www.sanger.ac.uk/covid-team</a> )                                           |
| EPI_ISL_989064, EPI_ISL_989229                                                                                                                                                                                                                                                                                                                                                                                                                                                                                                                                                                                                                                                                                                                                                                                                                                                                                                                                                                                                                                                                                                                                                                                                                                                                                                                                                                                                                                                                                                                                                                                                                                                                                                                                                                                                                                                                                                                                                                                                                                                                                                                                                                                                                                                                                                                                                                                                                                                                                                                                                                                                                                                                                                                                                                                                                                                                                                                                                                                                                                                                                                                                                                                                                                                                                                                                                                                                                                                                                                                                                                                                                                                                                                                                                                                                                                                                                                                                                                                                                                                                                                                                                                                                                                                                                                                                                                                                                                                                                                                                                                                                                                                                                                                                                                                                                                                                                                                                                                                                                                                                                                                                                                                                                                                                                                                                                                                                                                                                                                                                                                                                                                                                                                                                                                                                                                                                                                                                                                                                                                                                                                                                                                                                                                                                                                                                                                                                                                                                                                                                                                                                                                                                                                                                                                                                                                                                                                                                                 | Lighthouse Lab in Alderley Park | Wellcome Sanger Institute for the COVID-19 Genomics UK (COG-UK) Consortium | Jacquelyn Wynn, Mairead Hyland, The Lighthouse Lab in Alderley Park and Alex Alderton, Roberto Amato, Sonia Goncalves, Ewan Harrison, David K. Jackson, Ian Johnston, Dominic Kwiatkowski, Cordelia Langford, John Sillitoe on behalf of the Wellcome Sanger Institute COVID-19 Surveillance Team                                                                                                   |
| EPI_ISL_989246                                                                                                                                                                                                                                                                                                                                                                                                                                                                                                                                                                                                                                                                                                                                                                                                                                                                                                                                                                                                                                                                                                                                                                                                                                                                                                                                                                                                                                                                                                                                                                                                                                                                                                                                                                                                                                                                                                                                                                                                                                                                                                                                                                                                                                                                                                                                                                                                                                                                                                                                                                                                                                                                                                                                                                                                                                                                                                                                                                                                                                                                                                                                                                                                                                                                                                                                                                                                                                                                                                                                                                                                                                                                                                                                                                                                                                                                                                                                                                                                                                                                                                                                                                                                                                                                                                                                                                                                                                                                                                                                                                                                                                                                                                                                                                                                                                                                                                                                                                                                                                                                                                                                                                                                                                                                                                                                                                                                                                                                                                                                                                                                                                                                                                                                                                                                                                                                                                                                                                                                                                                                                                                                                                                                                                                                                                                                                                                                                                                                                                                                                                                                                                                                                                                                                                                                                                                                                                                                                                 | Lighthouse Lab in Alderley Park | Wellcome Sanger Institute for the COVID-19 Genomics UK (COG-UK) Consortium | Jacquelyn Wynn, Mairead Hyland, The Lighthouse Lab in Alderley Park and Alex Alderton, Roberto Amato, Sonia Goncalves, Ewan Harrison, David K. Jackson, Ian Johnston, Dominic Kwiatkowski, Cordelia Langford, John Sillitoe on behalf of the Wellcome Sanger Institute COVID-19 Surveillance Team ( <a href="http://www.sanger.ac.uk/covid-team">http://www.sanger.ac.uk/covid-team</a> )           |
| EPI_ISL_989449, EPI_ISL_989450, EPI_ISL_989451, EPI_ISL_989452, EPI_ISL_989453, EPI_ISL_989454, EPI_ISL_989455, EPI_ISL_989456, EPI_ISL_989457, EPI_ISL_989458, EPI_ISL_989459, EPI_ISL_989460, EPI_ISL_989461, EPI_ISL_989462, EPI_ISL_989463, EPI_ISL_989464, EPI_ISL_989465, EPI_ISL_989466, EPI_ISL_989467, EPI_ISL_989468, EPI_ISL_989469, EPI_ISL_989470, EPI_ISL_989471, EPI_ISL_989472, EPI_ISL_989473, EPI_ISL_989474, EPI_ISL_989475, EPI_ISL_989476, EPI_ISL_989477, EPI_ISL_989478, EPI_ISL_989479, EPI_ISL_989480, EPI_ISL_989481                                                                                                                                                                                                                                                                                                                                                                                                                                                                                                                                                                                                                                                                                                                                                                                                                                                                                                                                                                                                                                                                                                                                                                                                                                                                                                                                                                                                                                                                                                                                                                                                                                                                                                                                                                                                                                                                                                                                                                                                                                                                                                                                                                                                                                                                                                                                                                                                                                                                                                                                                                                                                                                                                                                                                                                                                                                                                                                                                                                                                                                                                                                                                                                                                                                                                                                                                                                                                                                                                                                                                                                                                                                                                                                                                                                                                                                                                                                                                                                                                                                                                                                                                                                                                                                                                                                                                                                                                                                                                                                                                                                                                                                                                                                                                                                                                                                                                                                                                                                                                                                                                                                                                                                                                                                                                                                                                                                                                                                                                                                                                                                                                                                                                                                                                                                                                                                                                                                                                                                                                                                                                                                                                                                                                                                                                                                                                                                                                                 |                                 |                                                                            |                                                                                                                                                                                                                                                                                                                                                                                                     |
| see above                                                                                                                                                                                                                                                                                                                                                                                                                                                                                                                                                                                                                                                                                                                                                                                                                                                                                                                                                                                                                                                                                                                                                                                                                                                                                                                                                                                                                                                                                                                                                                                                                                                                                                                                                                                                                                                                                                                                                                                                                                                                                                                                                                                                                                                                                                                                                                                                                                                                                                                                                                                                                                                                                                                                                                                                                                                                                                                                                                                                                                                                                                                                                                                                                                                                                                                                                                                                                                                                                                                                                                                                                                                                                                                                                                                                                                                                                                                                                                                                                                                                                                                                                                                                                                                                                                                                                                                                                                                                                                                                                                                                                                                                                                                                                                                                                                                                                                                                                                                                                                                                                                                                                                                                                                                                                                                                                                                                                                                                                                                                                                                                                                                                                                                                                                                                                                                                                                                                                                                                                                                                                                                                                                                                                                                                                                                                                                                                                                                                                                                                                                                                                                                                                                                                                                                                                                                                                                                                                                      | Lighthouse Lab in Glasgow       | Wellcome Sanger Institute for the COVID-19 Genomics UK (COG-UK) Consortium | Harper VanSteenhouse, Yumi Kasai, David Gray, Carol Clugston, Anna Dominiczak and Alex Alderton, Roberto Amato, Sonia Goncalves, Ewan Harrison, David K. Jackson, Ian Johnston, Dominic Kwiatkowski, Cordelia Langford, John Sillitoe on behalf of the Wellcome Sanger Institute COVID-19 Surveillance Team ( <a href="http://www.sanger.ac.uk/covid-team">http://www.sanger.ac.uk/covid-team</a> ) |
| EPI_ISL_989484, EPI_ISL_989486, EPI_ISL_989487, EPI_ISL_989488, EPI_ISL_989492, EPI_ISL_989493, EPI_ISL_989497, EPI_ISL_989498, EPI_ISL_989499, EPI_ISL_989500, EPI_ISL_989501, EPI_ISL_989502, EPI_ISL_989503, EPI_ISL_989504, EPI_ISL_989505, EPI_ISL_989506, EPI_ISL_989507, EPI_ISL_989508, EPI_ISL_989509, EPI_ISL_989510, EPI_ISL_989511, EPI_ISL_989514, EPI_ISL_989515, EPI_ISL_989516, EPI_ISL_989517, EPI_ISL_989518, EPI_ISL_989519, EPI_ISL_989520, EPI_ISL_989521, EPI_ISL_989523, EPI_ISL_989524, EPI_ISL_989525, EPI_ISL_989527, EPI_ISL_989528, EPI_ISL_989529, EPI_ISL_989530, EPI_ISL_989531, EPI_ISL_989532, EPI_ISL_989533, EPI_ISL_989534, EPI_ISL_989535, EPI_ISL_989536, EPI_ISL_989537, EPI_ISL_989538, EPI_ISL_989539, EPI_ISL_989540, EPI_ISL_989541, EPI_ISL_989542, EPI_ISL_989543, EPI_ISL_989544, EPI_ISL_989545, EPI_ISL_989546, EPI_ISL_989547, EPI_ISL_989548, EPI_ISL_989549, EPI_ISL_989550, EPI_ISL_989551, EPI_ISL_989552, EPI_ISL_989553, EPI_ISL_989554, EPI_ISL_989555, EPI_ISL_989556, EPI_ISL_989557, EPI_ISL_989558, EPI_ISL_989559, EPI_ISL_989560, EPI_ISL_989561, EPI_ISL_989562, EPI_ISL_989563, EPI_ISL_989564, EPI_ISL_989565, EPI_ISL_989566, EPI_ISL_989567, EPI_ISL_989568, EPI_ISL_989569, EPI_ISL_989570, EPI_ISL_989571, EPI_ISL_989572, EPI_ISL_989573, EPI_ISL_989574, EPI_ISL_989575, EPI_ISL_989576, EPI_ISL_989577, EPI_ISL_989578, EPI_ISL_989579, EPI_ISL_989580, EPI_ISL_989581, EPI_ISL_989582, EPI_ISL_989583, EPI_ISL_989584, EPI_ISL_989585, EPI_ISL_989586, EPI_ISL_989587, EPI_ISL_989588, EPI_ISL_989589, EPI_ISL_989590, EPI_ISL_989591, EPI_ISL_989592, EPI_ISL_989593, EPI_ISL_989594, EPI_ISL_989595, EPI_ISL_989596, EPI_ISL_989597, EPI_ISL_989598, EPI_ISL_989599, EPI_ISL_989600, EPI_ISL_989601, EPI_ISL_989602, EPI_ISL_989603, EPI_ISL_989604, EPI_ISL_989605, EPI_ISL_989606, EPI_ISL_989607, EPI_ISL_989608, EPI_ISL_989609, EPI_ISL_989610, EPI_ISL_989611, EPI_ISL_989612, EPI_ISL_989613, EPI_ISL_989614, EPI_ISL_989615, EPI_ISL_989616, EPI_ISL_989617, EPI_ISL_989618, EPI_ISL_989619, EPI_ISL_989620, EPI_ISL_989621, EPI_ISL_989622, EPI_ISL_989623, EPI_ISL_989624, EPI_ISL_989625, EPI_ISL_989626, EPI_ISL_989627, EPI_ISL_989628, EPI_ISL_989629, EPI_ISL_989630, EPI_ISL_989631, EPI_ISL_989632, EPI_ISL_989633, EPI_ISL_989634, EPI_ISL_989635, EPI_ISL_989636, EPI_ISL_989637, EPI_ISL_989638, EPI_ISL_989639, EPI_ISL_989640, EPI_ISL_989641, EPI_ISL_989642, EPI_ISL_989643, EPI_ISL_989644, EPI_ISL_989645, EPI_ISL_989646, EPI_ISL_989647, EPI_ISL_989648, EPI_ISL_989649, EPI_ISL_989650, EPI_ISL_989651, EPI_ISL_989652, EPI_ISL_989653, EPI_ISL_989654, EPI_ISL_989655, EPI_ISL_989656, EPI_ISL_989657, EPI_ISL_989658, EPI_ISL_989659, EPI_ISL_989660, EPI_ISL_989661, EPI_ISL_989662, EPI_ISL_989663, EPI_ISL_989664, EPI_ISL_989665, EPI_ISL_989666, EPI_ISL_989667, EPI_ISL_989668, EPI_ISL_989669, EPI_ISL_989670, EPI_ISL_989671, EPI_ISL_989672, EPI_ISL_989673, EPI_ISL_989674, EPI_ISL_989675, EPI_ISL_989676, EPI_ISL_989677, EPI_ISL_989678, EPI_ISL_989679, EPI_ISL_989680, EPI_ISL_989681, EPI_ISL_989682, EPI_ISL_989683, EPI_ISL_989684, EPI_ISL_989685, EPI_ISL_989686, EPI_ISL_989687, EPI_ISL_989688, EPI_ISL_989689, EPI_ISL_989690, EPI_ISL_989691, EPI_ISL_989692, EPI_ISL_989693, EPI_ISL_989694, EPI_ISL_989695, EPI_ISL_989696, EPI_ISL_989697, EPI_ISL_989698, EPI_ISL_989699, EPI_ISL_989700, EPI_ISL_989701, EPI_ISL_989702, EPI_ISL_989703, EPI_ISL_989704, EPI_ISL_989705, EPI_ISL_989706, EPI_ISL_989707, EPI_ISL_989708, EPI_ISL_989709, EPI_ISL_989710, EPI_ISL_989711, EPI_ISL_989712, EPI_ISL_989713, EPI_ISL_989714, EPI_ISL_989715, EPI_ISL_989716, EPI_ISL_989717, EPI_ISL_989718, EPI_ISL_989719, EPI_ISL_989720, EPI_ISL_989721, EPI_ISL_989722, EPI_ISL_989723, EPI_ISL_989724, EPI_ISL_989725, EPI_ISL_989726, EPI_ISL_989727, EPI_ISL_989728, EPI_ISL_989729, EPI_ISL_989730, EPI_ISL_989731, EPI_ISL_989732, EPI_ISL_989733, EPI_ISL_989734, EPI_ISL_989735, EPI_ISL_989736, EPI_ISL_989737, EPI_ISL_989738, EPI_ISL_989739, EPI_ISL_989740, EPI_ISL_989741, EPI_ISL_989742, EPI_ISL_989743, EPI_ISL_989744, EPI_ISL_989745, EPI_ISL_989746, EPI_ISL_989747, EPI_ISL_989748, EPI_ISL_989749, EPI_ISL_989750, EPI_ISL_989751, EPI_ISL_989752, EPI_ISL_989753, EPI_ISL_989754, EPI_ISL_989755, EPI_ISL_989756, EPI_ISL_989757, EPI_ISL_989758, EPI_ISL_989759, EPI_ISL_989760, EPI_ISL_989761, EPI_ISL_989762, EPI_ISL_989763, EPI_ISL_989764, EPI_ISL_989765, EPI_ISL_989766, EPI_ISL_989767, EPI_ISL_989768, EPI_ISL_989769, EPI_ISL_989770, EPI_ISL_989771, EPI_ISL_989772, EPI_ISL_989773, EPI_ISL_989774, EPI_ISL_989775, EPI_ISL_989776, EPI_ISL_989777, EPI_ISL_989778, EPI_ISL_989779, EPI_ISL_989780, EPI_ISL_989781, EPI_ISL_989782, EPI_ISL_989783, EPI_ISL_989784, EPI_ISL_989785, EPI_ISL_989786, EPI_ISL_989787, EPI_ISL_989788, EPI_ISL_989789, EPI_ISL_989790, EPI_ISL_989791, EPI_ISL_989792, EPI_ISL_989793, EPI_ISL_989794, EPI_ISL_989795, EPI_ISL_989796, EPI_ISL_989797, EPI_ISL_989798, EPI_ISL_989799, EPI_ISL_989800, EPI_ISL_989801, EPI_ISL_989802, EPI_ISL_989803, EPI_ISL_989804, EPI_ISL_989805, EPI_ISL_989806, EPI_ISL_989807, EPI_ISL_989808, EPI_ISL_989809, EPI_ISL_989810, EPI_ISL_989811, EPI_ISL_989812, EPI_ISL_989813, EPI_ISL_989814, EPI_ISL_989815, EPI_ISL_989816, EPI_ISL_989817, EPI_ISL_989818, EPI_ISL_989819, EPI_ISL_989820, EPI_ISL_989821, EPI_ISL_989822, EPI_ISL_989823, EPI_ISL_989824, EPI_ISL_989825, EPI_ISL_989826, EPI_ISL_989827, EPI_ISL_989828, EPI_ISL_989829, EPI_ISL_989830, EPI_ISL_989831, EPI_ISL_989832, EPI_ISL_989833, EPI_ISL_989834, EPI_ISL_989835, EPI_ISL_989836, EPI_ISL_989837, EPI_ISL_989838, EPI_ISL_989839, EPI_ISL_989840, EPI_ISL_989841, EPI_ISL_989842, EPI_ISL_989843, EPI_ISL_989844, EPI_ISL_989845, EPI_ISL_989846, EPI_ISL_989847, EPI_ISL_989848, EPI_ISL_989849, EPI_ISL_989850, EPI_ISL_989851, EPI_ISL_989852, EPI_ISL_989853, EPI_ISL_989854, EPI_ISL_989855, EPI_ISL_989856, EPI_ISL_989857, EPI_ISL_989858, EPI_ISL_989859, EPI_ISL_989860, EPI_ISL_989861, EPI_ISL_989862, EPI_ISL_989863, EPI_ISL_989864, EPI_ISL_989865, EPI_ISL_989866, EPI_ISL_989867, EPI_ISL_989868, EPI_ISL_989869, EPI_ISL_989870, EPI_ISL_989871, EPI_ISL_989872, EPI_ISL_989873, EPI_ISL_989874, EPI_ISL_989875, EPI_ISL_989876, EPI_ISL_989877, EPI_ISL_989878, EPI_ISL_989879, EPI_ISL_989880, EPI_ISL_989881, EPI_ISL_989882, EPI_ISL_989883, EPI_ISL_989884, EPI_ISL_989885, EPI_ISL_989886, EPI_ISL_989887, EPI_ISL_989888, EPI_ISL_989889, EPI_ISL_989890, EPI_ISL_989891, EPI_ISL_989892, EPI_ISL_989893, EPI_ISL_989894, EPI_ISL_989895, EPI_ISL_989896, EPI_ISL_989897, EPI_ISL_989898, EPI_ISL_989899, EPI_ISL_989900, EPI_ISL_989901, EPI_ISL_989902, EPI_ISL_989903, EPI_ISL_989904, EPI_ISL_989905, EPI_ISL_989906, EPI_ISL_989907, EPI_ISL_989908, EPI_ISL_989909, EPI_ISL_989910, EPI_ISL_989911, EPI_ISL_989912, EPI_ISL_989913 |                                 |                                                                            |                                                                                                                                                                                                                                                                                                                                                                                                     |
| see above                                                                                                                                                                                                                                                                                                                                                                                                                                                                                                                                                                                                                                                                                                                                                                                                                                                                                                                                                                                                                                                                                                                                                                                                                                                                                                                                                                                                                                                                                                                                                                                                                                                                                                                                                                                                                                                                                                                                                                                                                                                                                                                                                                                                                                                                                                                                                                                                                                                                                                                                                                                                                                                                                                                                                                                                                                                                                                                                                                                                                                                                                                                                                                                                                                                                                                                                                                                                                                                                                                                                                                                                                                                                                                                                                                                                                                                                                                                                                                                                                                                                                                                                                                                                                                                                                                                                                                                                                                                                                                                                                                                                                                                                                                                                                                                                                                                                                                                                                                                                                                                                                                                                                                                                                                                                                                                                                                                                                                                                                                                                                                                                                                                                                                                                                                                                                                                                                                                                                                                                                                                                                                                                                                                                                                                                                                                                                                                                                                                                                                                                                                                                                                                                                                                                                                                                                                                                                                                                                                      | Lighthouse Lab in Alderley Park | Wellcome Sanger Institute for the COVID-19 Genomics UK (COG-UK) Consortium | Jacquelyn Wynn, Mairead Hyland, The Lighthouse Lab in Alderley Park and Alex Alderton, Roberto Amato, Sonia Goncalves, Ewan Harrison, David K. Jackson, Ian Johnston, Dominic Kwiatkowski, Cordelia Langford, John Sillitoe on behalf of the Wellcome Sanger Institute COVID-19 Surveillance Team ( <a href="http://www.sanger.ac.uk/covid-team">http://www.sanger.ac.uk/covid-team</a> )           |
| EPI_ISL_989831                                                                                                                                                                                                                                                                                                                                                                                                                                                                                                                                                                                                                                                                                                                                                                                                                                                                                                                                                                                                                                                                                                                                                                                                                                                                                                                                                                                                                                                                                                                                                                                                                                                                                                                                                                                                                                                                                                                                                                                                                                                                                                                                                                                                                                                                                                                                                                                                                                                                                                                                                                                                                                                                                                                                                                                                                                                                                                                                                                                                                                                                                                                                                                                                                                                                                                                                                                                                                                                                                                                                                                                                                                                                                                                                                                                                                                                                                                                                                                                                                                                                                                                                                                                                                                                                                                                                                                                                                                                                                                                                                                                                                                                                                                                                                                                                                                                                                                                                                                                                                                                                                                                                                                                                                                                                                                                                                                                                                                                                                                                                                                                                                                                                                                                                                                                                                                                                                                                                                                                                                                                                                                                                                                                                                                                                                                                                                                                                                                                                                                                                                                                                                                                                                                                                                                                                                                                                                                                                                                 | Lighthouse Lab in Milton Keynes | Wellcome Sanger Institute for the COVID-19 Genomics UK (COG-UK) Consortium | The Lighthouse Lab in Milton Keynes and Alex Alderton, Roberto Amato, Sonia Goncalves, Ewan Harrison, David K. Jackson, Ian Johnston, Dominic Kwiatkowski, Cordelia Langford, John Sillitoe on behalf of the Wellcome Sanger Institute COVID-19 Surveillance Team ( <a href="http://www.sanger.ac.uk/covid-team">http://www.sanger.ac.uk/covid-team</a> )                                           |
| EPI_ISL_989844                                                                                                                                                                                                                                                                                                                                                                                                                                                                                                                                                                                                                                                                                                                                                                                                                                                                                                                                                                                                                                                                                                                                                                                                                                                                                                                                                                                                                                                                                                                                                                                                                                                                                                                                                                                                                                                                                                                                                                                                                                                                                                                                                                                                                                                                                                                                                                                                                                                                                                                                                                                                                                                                                                                                                                                                                                                                                                                                                                                                                                                                                                                                                                                                                                                                                                                                                                                                                                                                                                                                                                                                                                                                                                                                                                                                                                                                                                                                                                                                                                                                                                                                                                                                                                                                                                                                                                                                                                                                                                                                                                                                                                                                                                                                                                                                                                                                                                                                                                                                                                                                                                                                                                                                                                                                                                                                                                                                                                                                                                                                                                                                                                                                                                                                                                                                                                                                                                                                                                                                                                                                                                                                                                                                                                                                                                                                                                                                                                                                                                                                                                                                                                                                                                                                                                                                                                                                                                                                                                 | Lighthouse Lab in Glasgow       | Wellcome Sanger Institute for the COVID-19 Genomics UK (COG-UK) Consortium | Harper VanSteenhouse, Yumi Kasai, David Gray, Carol Clugston, Anna Dominiczak and Alex Alderton, Roberto Amato, Sonia Goncalves, Ewan Harrison, David K. Jackson, Ian Johnston, Dominic Kwiatkowski, Cordelia Langford, John Sillitoe on behalf of the Wellcome Sanger Institute COVID-19 Surveillance Team ( <a href="http://www.sanger.ac.uk/covid-team">http://www.sanger.ac.uk/covid-team</a> ) |
| EPI_ISL_989860, EPI_ISL_989863, EPI_ISL_989864, EPI_ISL_989872, EPI_ISL_989875, EPI_ISL_989878, EPI_ISL_989880                                                                                                                                                                                                                                                                                                                                                                                                                                                                                                                                                                                                                                                                                                                                                                                                                                                                                                                                                                                                                                                                                                                                                                                                                                                                                                                                                                                                                                                                                                                                                                                                                                                                                                                                                                                                                                                                                                                                                                                                                                                                                                                                                                                                                                                                                                                                                                                                                                                                                                                                                                                                                                                                                                                                                                                                                                                                                                                                                                                                                                                                                                                                                                                                                                                                                                                                                                                                                                                                                                                                                                                                                                                                                                                                                                                                                                                                                                                                                                                                                                                                                                                                                                                                                                                                                                                                                                                                                                                                                                                                                                                                                                                                                                                                                                                                                                                                                                                                                                                                                                                                                                                                                                                                                                                                                                                                                                                                                                                                                                                                                                                                                                                                                                                                                                                                                                                                                                                                                                                                                                                                                                                                                                                                                                                                                                                                                                                                                                                                                                                                                                                                                                                                                                                                                                                                                                                                 | Lighthouse Lab in Alderley Park | Wellcome Sanger Institute for the COVID-19 Genomics UK (COG-UK) Consortium | Jacquelyn Wynn, Mairead Hyland, The Lighthouse Lab in Alderley Park and Alex Alderton, Roberto Amato, Sonia Goncalves, Ewan Harrison, David K. Jackson, Ian Johnston, Dominic Kwiatkowski, Cordelia Langford, John Sillitoe on behalf of the Wellcome Sanger Institute COVID-19 Surveillance Team ( <a href="http://www.sanger.ac.uk/covid-team">http://www.sanger.ac.uk/covid-team</a> )           |
| EPI_ISL_989882, EPI_ISL_989883, EPI_ISL_989884, EPI_ISL_989885, EPI_ISL_989886, EPI_ISL_989887, EPI_ISL_989888, EPI_ISL_989889, EPI_ISL_989890, EPI_ISL_989891, EPI_ISL_989892, EPI_ISL_989893, EPI_ISL_989894, EPI_ISL_989895, EPI_ISL_989896, EPI_ISL_989897, EPI_ISL_989898, EPI_ISL_989899, EPI_ISL_989900, EPI_ISL_989901, EPI_ISL_989902, EPI_ISL_989903, EPI_ISL_989904, EPI_ISL_989905, EPI_ISL_989906, EPI_ISL_989907, EPI_ISL_989908, EPI_ISL_989909, EPI_ISL_989910, EPI_ISL_989911, EPI_ISL_989912, EPI_ISL_989913                                                                                                                                                                                                                                                                                                                                                                                                                                                                                                                                                                                                                                                                                                                                                                                                                                                                                                                                                                                                                                                                                                                                                                                                                                                                                                                                                                                                                                                                                                                                                                                                                                                                                                                                                                                                                                                                                                                                                                                                                                                                                                                                                                                                                                                                                                                                                                                                                                                                                                                                                                                                                                                                                                                                                                                                                                                                                                                                                                                                                                                                                                                                                                                                                                                                                                                                                                                                                                                                                                                                                                                                                                                                                                                                                                                                                                                                                                                                                                                                                                                                                                                                                                                                                                                                                                                                                                                                                                                                                                                                                                                                                                                                                                                                                                                                                                                                                                                                                                                                                                                                                                                                                                                                                                                                                                                                                                                                                                                                                                                                                                                                                                                                                                                                                                                                                                                                                                                                                                                                                                                                                                                                                                                                                                                                                                                                                                                                                                                 |                                 |                                                                            |                                                                                                                                                                                                                                                                                                                                                                                                     |
| see above                                                                                                                                                                                                                                                                                                                                                                                                                                                                                                                                                                                                                                                                                                                                                                                                                                                                                                                                                                                                                                                                                                                                                                                                                                                                                                                                                                                                                                                                                                                                                                                                                                                                                                                                                                                                                                                                                                                                                                                                                                                                                                                                                                                                                                                                                                                                                                                                                                                                                                                                                                                                                                                                                                                                                                                                                                                                                                                                                                                                                                                                                                                                                                                                                                                                                                                                                                                                                                                                                                                                                                                                                                                                                                                                                                                                                                                                                                                                                                                                                                                                                                                                                                                                                                                                                                                                                                                                                                                                                                                                                                                                                                                                                                                                                                                                                                                                                                                                                                                                                                                                                                                                                                                                                                                                                                                                                                                                                                                                                                                                                                                                                                                                                                                                                                                                                                                                                                                                                                                                                                                                                                                                                                                                                                                                                                                                                                                                                                                                                                                                                                                                                                                                                                                                                                                                                                                                                                                                                                      | Lighthouse Lab in Glasgow       | Wellcome Sanger Institute for the COVID-19 Genomics UK (COG-UK) Consortium | Harper VanSteenhouse, Yumi Kasai, David Gray, Carol Clugston, Anna Dominiczak and Alex Alderton, Roberto Amato, Sonia Goncalves, Ewan Harrison, David K. Jackson, Ian Johnston, Dominic Kwiatkowski, Cordelia Langford, John Sillitoe on behalf of the Wellcome Sanger Institute COVID-19 Surveillance Team ( <a href="http://www.sanger.ac.uk/covid-team">http://www.sanger.ac.uk/covid-team</a> ) |
| EPI_ISL_989914, EPI_ISL_989915, EPI_ISL_989916, EPI_ISL_989917, EPI_ISL_989918, EPI_ISL_989919, EPI_ISL_989920, EPI_ISL_989921, EPI_ISL_989922, EPI_ISL_989923, EPI_ISL_989924, EPI_ISL_989925, EPI_ISL_989926, EPI_ISL_989927, EPI_ISL_989928, EPI_ISL_989929, EPI_ISL_989930, EPI_ISL_989931, EPI_ISL_989932, EPI_ISL_989933, EPI_ISL_989934, EPI_ISL_989935, EPI_ISL_989936, EPI_ISL_989937, EPI_ISL_989938, EPI_ISL_989939, EPI_ISL_989940, EPI_ISL_989941, EPI_ISL_989942, EPI_ISL_989943, EPI_ISL_989944, EPI_ISL_989945, EPI_ISL_989946, EPI_ISL_989947, EPI_ISL_989948, EPI_ISL_989949, EPI_ISL_989950, EPI_ISL_989951, EPI_ISL_989952, EPI_ISL_989953, EPI_ISL_989954, EPI_ISL_989955, EPI_ISL_989956, EPI_ISL_989957, EPI_ISL_989958, EPI_ISL_989959, EPI_ISL_989960, EPI_ISL_989961, EPI_ISL_989962, EPI_ISL_989963, EPI_ISL_989964, EPI_ISL_989965, EPI_ISL_989966, EPI_ISL_989967, EPI_ISL_989968, EPI_ISL_989969, EPI_ISL_989970, EPI_ISL_989971, EPI_ISL_989972, EPI_ISL_989973, EPI_ISL_989974, EPI_ISL_989975, EPI_ISL_989976, EPI_ISL_989977, EPI_ISL_989978, EPI_ISL_989979, EPI_ISL_989980, EPI_ISL_989981, EPI_ISL_989982, EPI_ISL_989983, EPI_ISL_989984, EPI_ISL_989985, EPI_ISL_989986, EPI_ISL_989987, EPI_ISL_989988, EPI_ISL_989989, EPI_ISL_989990, EPI_ISL_989991, EPI_ISL_989992, EPI_ISL_989993, EPI_ISL_989994, EPI_ISL_989995, EPI_ISL_989996, EPI_ISL_989997, EPI_ISL_989998, EPI_ISL_989999                                                                                                                                                                                                                                                                                                                                                                                                                                                                                                                                                                                                                                                                                                                                                                                                                                                                                                                                                                                                                                                                                                                                                                                                                                                                                                                                                                                                                                                                                                                                                                                                                                                                                                                                                                                                                                                                                                                                                                                                                                                                                                                                                                                                                                                                                                                                                                                                                                                                                                                                                                                                                                                                                                                                                                                                                                                                                                                                                                                                                                                                                                                                                                                                                                                                                                                                                                                                                                                                                                                                                                                                                                                                                                                                                                                                                                                                                                                                                                                                                                                                                                                                                                                                                                                                                                                                                                                                                                                                                                                                                                                                                                                                                                                                                                                                                                                                                                                                                                                                                                                                                                                                                                                                                                                                                                                                                                                                                                                                                                                                                 |                                 |                                                                            |                                                                                                                                                                                                                                                                                                                                                                                                     |
| see above                                                                                                                                                                                                                                                                                                                                                                                                                                                                                                                                                                                                                                                                                                                                                                                                                                                                                                                                                                                                                                                                                                                                                                                                                                                                                                                                                                                                                                                                                                                                                                                                                                                                                                                                                                                                                                                                                                                                                                                                                                                                                                                                                                                                                                                                                                                                                                                                                                                                                                                                                                                                                                                                                                                                                                                                                                                                                                                                                                                                                                                                                                                                                                                                                                                                                                                                                                                                                                                                                                                                                                                                                                                                                                                                                                                                                                                                                                                                                                                                                                                                                                                                                                                                                                                                                                                                                                                                                                                                                                                                                                                                                                                                                                                                                                                                                                                                                                                                                                                                                                                                                                                                                                                                                                                                                                                                                                                                                                                                                                                                                                                                                                                                                                                                                                                                                                                                                                                                                                                                                                                                                                                                                                                                                                                                                                                                                                                                                                                                                                                                                                                                                                                                                                                                                                                                                                                                                                                                                                      | Lighthouse Lab in Glasgow       | Wellcome Sanger Institute for the COVID-19 Genomics UK (COG-UK) Consortium | Harper VanSteenhouse, Yumi Kasai, David Gray, Carol Clugston, Anna Dominiczak and Alex Alderton, Roberto Amato, Sonia Goncalves, Ewan Harrison, David K. Jackson, Ian Johnston, Dominic Kwiatkowski, Cordelia Langford, John Sillitoe on behalf of the Wellcome Sanger Institute COVID-19 Surveillance Team                                                                                         |
| EPI_ISL_996407, EPI_ISL_996442, EPI_ISL_996443, EPI_ISL_996464, EPI_ISL_996465, EPI_ISL_996466, EPI_ISL_996467, EPI_ISL_996471, EPI_ISL_996472, EPI_ISL_996473, EPI_ISL_996474                                                                                                                                                                                                                                                                                                                                                                                                                                                                                                                                                                                                                                                                                                                                                                                                                                                                                                                                                                                                                                                                                                                                                                                                                                                                                                                                                                                                                                                                                                                                                                                                                                                                                                                                                                                                                                                                                                                                                                                                                                                                                                                                                                                                                                                                                                                                                                                                                                                                                                                                                                                                                                                                                                                                                                                                                                                                                                                                                                                                                                                                                                                                                                                                                                                                                                                                                                                                                                                                                                                                                                                                                                                                                                                                                                                                                                                                                                                                                                                                                                                                                                                                                                                                                                                                                                                                                                                                                                                                                                                                                                                                                                                                                                                                                                                                                                                                                                                                                                                                                                                                                                                                                                                                                                                                                                                                                                                                                                                                                                                                                                                                                                                                                                                                                                                                                                                                                                                                                                                                                                                                                                                                                                                                                                                                                                                                                                                                                                                                                                                                                                                                                                                                                                                                                                                                 |                                 |                                                                            |                                                                                                                                                                                                                                                                                                                                                                                                     |
| see above                                                                                                                                                                                                                                                                                                                                                                                                                                                                                                                                                                                                                                                                                                                                                                                                                                                                                                                                                                                                                                                                                                                                                                                                                                                                                                                                                                                                                                                                                                                                                                                                                                                                                                                                                                                                                                                                                                                                                                                                                                                                                                                                                                                                                                                                                                                                                                                                                                                                                                                                                                                                                                                                                                                                                                                                                                                                                                                                                                                                                                                                                                                                                                                                                                                                                                                                                                                                                                                                                                                                                                                                                                                                                                                                                                                                                                                                                                                                                                                                                                                                                                                                                                                                                                                                                                                                                                                                                                                                                                                                                                                                                                                                                                                                                                                                                                                                                                                                                                                                                                                                                                                                                                                                                                                                                                                                                                                                                                                                                                                                                                                                                                                                                                                                                                                                                                                                                                                                                                                                                                                                                                                                                                                                                                                                                                                                                                                                                                                                                                                                                                                                                                                                                                                                                                                                                                                                                                                                                                      | University of Birmingham        | COVID-19 Genomics UK (COG-UK) Consortium                                   | Institute of Microbiology, University of Birmingham: Claire McMurray, Joanne Stockton, Samuel Nicholls, Radoslaw Poplawski, Will Rowe, Josh Quick, Nicholas Loman. University of Birmingham Testing Laboratory: Celina M Whalley, Andrew Bosworth, Charlotte Poxon, Kasun Wanigasooriya, Oliver Pickles, Mike Kidd                                                                                  |

|                                                                                                                                                                                                                                                                                                                                                                                                                                                                                                                                                                                                                                                                                                                                                                                                                                                                                                                                                                                                                                                                                                                                                                                                                                                                                                                                                                                                                                                                                                                                                                                                                                                                                                                                                                                                                                                                                                |                                                                                                                                                                                                                     |                                                                           |                                                                                                                                                                                                                                                                                                                                                                                                                                                                                                                                                                                                                                                                                          |
|------------------------------------------------------------------------------------------------------------------------------------------------------------------------------------------------------------------------------------------------------------------------------------------------------------------------------------------------------------------------------------------------------------------------------------------------------------------------------------------------------------------------------------------------------------------------------------------------------------------------------------------------------------------------------------------------------------------------------------------------------------------------------------------------------------------------------------------------------------------------------------------------------------------------------------------------------------------------------------------------------------------------------------------------------------------------------------------------------------------------------------------------------------------------------------------------------------------------------------------------------------------------------------------------------------------------------------------------------------------------------------------------------------------------------------------------------------------------------------------------------------------------------------------------------------------------------------------------------------------------------------------------------------------------------------------------------------------------------------------------------------------------------------------------------------------------------------------------------------------------------------------------|---------------------------------------------------------------------------------------------------------------------------------------------------------------------------------------------------------------------|---------------------------------------------------------------------------|------------------------------------------------------------------------------------------------------------------------------------------------------------------------------------------------------------------------------------------------------------------------------------------------------------------------------------------------------------------------------------------------------------------------------------------------------------------------------------------------------------------------------------------------------------------------------------------------------------------------------------------------------------------------------------------|
| EPI_ISL_996561, EPI_ISL_996562, EPI_ISL_996563, EPI_ISL_996567                                                                                                                                                                                                                                                                                                                                                                                                                                                                                                                                                                                                                                                                                                                                                                                                                                                                                                                                                                                                                                                                                                                                                                                                                                                                                                                                                                                                                                                                                                                                                                                                                                                                                                                                                                                                                                 | Department of Pathology, University of Cambridge                                                                                                                                                                    | COVID-19 Genomics UK (COG-UK) Consortium                                  | Aminu S. Jahun, Yasmin Chaudhry, Iliana Georgana, Myra Hosmillo, Rhys Izuagbe, William L. Hamilton, Martin D. Curran, Surendra Parmar, Ian Goodfellow                                                                                                                                                                                                                                                                                                                                                                                                                                                                                                                                    |
| EPI_ISL_996632, EPI_ISL_996633, EPI_ISL_996634, EPI_ISL_996635, EPI_ISL_996636, EPI_ISL_996701, EPI_ISL_996711                                                                                                                                                                                                                                                                                                                                                                                                                                                                                                                                                                                                                                                                                                                                                                                                                                                                                                                                                                                                                                                                                                                                                                                                                                                                                                                                                                                                                                                                                                                                                                                                                                                                                                                                                                                 |                                                                                                                                                                                                                     |                                                                           |                                                                                                                                                                                                                                                                                                                                                                                                                                                                                                                                                                                                                                                                                          |
| EPI_ISL_997068, EPI_ISL_997069                                                                                                                                                                                                                                                                                                                                                                                                                                                                                                                                                                                                                                                                                                                                                                                                                                                                                                                                                                                                                                                                                                                                                                                                                                                                                                                                                                                                                                                                                                                                                                                                                                                                                                                                                                                                                                                                 | West of Scotland Specialist Virology Centre, NHSGGC / MRC-University of Glasgow Centre for Virus Research                                                                                                           | COVID-19 Genomics UK (COG-UK) Consortium                                  | Ana da Silva Filipe, Natasha Johnson, Kathy Smollett, Daniel Mair, Stephen Carmichael, Alice Broos, Lily Tong, Jenna Nichols, Kyriaki Nomikou; Sarah McDonald; Richard Orton, Joseph Hughes, Sreenu Vattipally, David L Robertson; Alasdair MacLean, Rory Gunson; Sharif Shaaban, Matthew Holden; Rachel Blacow, Guy Mollett, Kathy Li, James Shepherd, Antonia Ho, Emma Thomson                                                                                                                                                                                                                                                                                                         |
| EPI_ISL_997104, EPI_ISL_997105, EPI_ISL_997107, EPI_ISL_997108, EPI_ISL_997126, EPI_ISL_997128, EPI_ISL_997129, EPI_ISL_997130, EPI_ISL_997131, EPI_ISL_997164                                                                                                                                                                                                                                                                                                                                                                                                                                                                                                                                                                                                                                                                                                                                                                                                                                                                                                                                                                                                                                                                                                                                                                                                                                                                                                                                                                                                                                                                                                                                                                                                                                                                                                                                 | Virology Department, Royal Infirmary of Edinburgh, NHS Lothian / School of Biological Sciences, University of Edinburgh                                                                                             | COVID-19 Genomics UK (COG-UK) Consortium                                  | McHugh M, Dewar R, Cotton S, Rooke S, O'Toole Á, Scher E, Hill V, McCrone JT, Colquhoun R, Yu X, Jackson B, Rambaut A, Templeton K                                                                                                                                                                                                                                                                                                                                                                                                                                                                                                                                                       |
| EPI_ISL_997180, EPI_ISL_997181, EPI_ISL_997182, EPI_ISL_997183, EPI_ISL_997185, EPI_ISL_997188, EPI_ISL_997189, EPI_ISL_997190, EPI_ISL_997191, EPI_ISL_997192, EPI_ISL_997193, EPI_ISL_997194, EPI_ISL_997195, EPI_ISL_997196, EPI_ISL_997197, EPI_ISL_997198, EPI_ISL_997199, EPI_ISL_997200, EPI_ISL_997202, EPI_ISL_997203, EPI_ISL_997204, EPI_ISL_997205, EPI_ISL_997207, EPI_ISL_997208, EPI_ISL_997286, EPI_ISL_997287, EPI_ISL_997339                                                                                                                                                                                                                                                                                                                                                                                                                                                                                                                                                                                                                                                                                                                                                                                                                                                                                                                                                                                                                                                                                                                                                                                                                                                                                                                                                                                                                                                 |                                                                                                                                                                                                                     |                                                                           |                                                                                                                                                                                                                                                                                                                                                                                                                                                                                                                                                                                                                                                                                          |
| see above                                                                                                                                                                                                                                                                                                                                                                                                                                                                                                                                                                                                                                                                                                                                                                                                                                                                                                                                                                                                                                                                                                                                                                                                                                                                                                                                                                                                                                                                                                                                                                                                                                                                                                                                                                                                                                                                                      | University of Exeter                                                                                                                                                                                                | COVID-19 Genomics UK (COG-UK) Consortium                                  | Ben Temperton, Aaron Jeffries, Michelle Michelsen, Joanna Warwick-Dugdale, Audrey Farbos, Robyn Manley, Stephen Michell, Jane Masoli                                                                                                                                                                                                                                                                                                                                                                                                                                                                                                                                                     |
| EPI_ISL_997426, EPI_ISL_997427, EPI_ISL_997428, EPI_ISL_997429, EPI_ISL_997430, EPI_ISL_997431, EPI_ISL_997432, EPI_ISL_997434, EPI_ISL_997435, EPI_ISL_997436, EPI_ISL_997437, EPI_ISL_997438, EPI_ISL_997440, EPI_ISL_997441, EPI_ISL_997448, EPI_ISL_997449, EPI_ISL_997450, EPI_ISL_997486, EPI_ISL_997487, EPI_ISL_997489, EPI_ISL_997492, EPI_ISL_997493, EPI_ISL_997496, EPI_ISL_997497, EPI_ISL_997498, EPI_ISL_997499, EPI_ISL_997500, EPI_ISL_997501                                                                                                                                                                                                                                                                                                                                                                                                                                                                                                                                                                                                                                                                                                                                                                                                                                                                                                                                                                                                                                                                                                                                                                                                                                                                                                                                                                                                                                 |                                                                                                                                                                                                                     |                                                                           |                                                                                                                                                                                                                                                                                                                                                                                                                                                                                                                                                                                                                                                                                          |
| see above                                                                                                                                                                                                                                                                                                                                                                                                                                                                                                                                                                                                                                                                                                                                                                                                                                                                                                                                                                                                                                                                                                                                                                                                                                                                                                                                                                                                                                                                                                                                                                                                                                                                                                                                                                                                                                                                                      | Liverpool Clinical Laboratories                                                                                                                                                                                     | COVID-19 Genomics UK (COG-UK) Consortium                                  | Sam Haldenby, Anita Lucaci, Steve Paterson, Julian Hiscox, Alistair Darby, M Almsaud, A Alrezaihi, Muhannad Alruwaili, Stuart D Armstrong, Jones Benjamin, Eleanor G Bentley, Anu Chawla, Jordan J Clark, Angela Cowell, Richard Eccles, Isabel Garcia-Dorival, Matthew Gemmell, Alessandro Gerada, PKF Gilmore, Richard Gregory, Ximeng Han, Catherine Hartley, Margaret Hughes, Miren Iturriza-Gomara, James Johnson, L Luu, Jenifer Manson, Charlotte Nelson, Elaine O'Toole, Cassie Olateju, Rebekah Penrice-Randal, Lucille Rainbow, N.P Randle, Trevor Ian Robinson, Parul Sharma, Ghada T Shawli, James P Stewart, Neil Swainston, Ecaterina Varnos, Joanne Watts, Mark Whitehead |
| EPI_ISL_997657, EPI_ISL_997658, EPI_ISL_997659, EPI_ISL_997660, EPI_ISL_997665, EPI_ISL_997672                                                                                                                                                                                                                                                                                                                                                                                                                                                                                                                                                                                                                                                                                                                                                                                                                                                                                                                                                                                                                                                                                                                                                                                                                                                                                                                                                                                                                                                                                                                                                                                                                                                                                                                                                                                                 | Barts Health NHS Trust                                                                                                                                                                                              | COVID-19 Genomics UK (COG-UK) Consortium                                  | CUTINO-MOGUEL, Maria-Teresa; HARRINGTON, David; OWOYEMI, Dola; KULASEGARAN-SHYLINI, Raghavendran; BROAD, Claire; KELE, Beatrix                                                                                                                                                                                                                                                                                                                                                                                                                                                                                                                                                           |
| EPI_ISL_997833, EPI_ISL_997882, EPI_ISL_997883, EPI_ISL_997884, EPI_ISL_997885, EPI_ISL_997886, EPI_ISL_997888, EPI_ISL_997889, EPI_ISL_997897, EPI_ISL_997898, EPI_ISL_997899, EPI_ISL_997900, EPI_ISL_997902, EPI_ISL_997903, EPI_ISL_997910, EPI_ISL_997911, EPI_ISL_997912, EPI_ISL_997913, EPI_ISL_997914, EPI_ISL_997915, EPI_ISL_997917, EPI_ISL_997919, EPI_ISL_997920, EPI_ISL_997921, EPI_ISL_997924, EPI_ISL_997925, EPI_ISL_997926, EPI_ISL_998012, EPI_ISL_998013, EPI_ISL_998014, EPI_ISL_998015, EPI_ISL_998016, EPI_ISL_998017, EPI_ISL_998018, EPI_ISL_998019, EPI_ISL_998020, EPI_ISL_998021, EPI_ISL_998022, EPI_ISL_998023, EPI_ISL_998024, EPI_ISL_998025, EPI_ISL_998026, EPI_ISL_998027, EPI_ISL_998028, EPI_ISL_998029, EPI_ISL_998030, EPI_ISL_998031, EPI_ISL_998032, EPI_ISL_998033, EPI_ISL_998034, EPI_ISL_998035, EPI_ISL_998036, EPI_ISL_998037, EPI_ISL_998038, EPI_ISL_998039, EPI_ISL_998040, EPI_ISL_998041, EPI_ISL_998042, EPI_ISL_998043, EPI_ISL_998044, EPI_ISL_998045, EPI_ISL_998046, EPI_ISL_998047, EPI_ISL_998048, EPI_ISL_998049, EPI_ISL_998050, EPI_ISL_998051, EPI_ISL_998052, EPI_ISL_998053, EPI_ISL_998054, EPI_ISL_998055, EPI_ISL_998056, EPI_ISL_998057, EPI_ISL_998058, EPI_ISL_998059, EPI_ISL_998060, EPI_ISL_998061, EPI_ISL_998062, EPI_ISL_998063, EPI_ISL_998064, EPI_ISL_998065, EPI_ISL_998066, EPI_ISL_998067, EPI_ISL_998068, EPI_ISL_998069, EPI_ISL_998070, EPI_ISL_998071, EPI_ISL_998072, EPI_ISL_998073, EPI_ISL_998074, EPI_ISL_998075, EPI_ISL_998076, EPI_ISL_998077, EPI_ISL_998078, EPI_ISL_998079, EPI_ISL_998080, EPI_ISL_998081, EPI_ISL_998082, EPI_ISL_998083, EPI_ISL_998084, EPI_ISL_998085, EPI_ISL_998086, EPI_ISL_998087, EPI_ISL_998088, EPI_ISL_998089, EPI_ISL_998090, EPI_ISL_998091, EPI_ISL_998092, EPI_ISL_998093, EPI_ISL_998094, EPI_ISL_998095, EPI_ISL_998096, EPI_ISL_998097, EPI_ISL_998098 |                                                                                                                                                                                                                     |                                                                           |                                                                                                                                                                                                                                                                                                                                                                                                                                                                                                                                                                                                                                                                                          |
| see above                                                                                                                                                                                                                                                                                                                                                                                                                                                                                                                                                                                                                                                                                                                                                                                                                                                                                                                                                                                                                                                                                                                                                                                                                                                                                                                                                                                                                                                                                                                                                                                                                                                                                                                                                                                                                                                                                      | University College London, Great Ormond Street Hospital for Children NHS Foundation Trust, Imperial College Healthcare NHS Trust                                                                                    | COVID-19 Genomics UK (COG-UK) Consortium                                  | Sergi Castellano, Rachel Williams, Mark Kristiansen, Paola Resende Silva, Sunando Roy, Tony Brooks, Helena Tutill, Paola Niola, Patricia Dyal, Charlotte Williams, Leysa Forrest, Yasmin Panchbhaya, Jacqueline Findlay, Samuel Weeks, Julianne Brown, Kathryn Harris, Paul Randell, James Price, Alison Holmes, Judith Breuer                                                                                                                                                                                                                                                                                                                                                           |
| EPI_ISL_998232, EPI_ISL_998299, EPI_ISL_998300, EPI_ISL_998301, EPI_ISL_998303                                                                                                                                                                                                                                                                                                                                                                                                                                                                                                                                                                                                                                                                                                                                                                                                                                                                                                                                                                                                                                                                                                                                                                                                                                                                                                                                                                                                                                                                                                                                                                                                                                                                                                                                                                                                                 | Regional Virus Laboratory, Belfast Health and Social Care Trust                                                                                                                                                     | COVID-19 Genomics UK (COG-UK) Consortium                                  | Conall McCaughey, James McKenna, Tanya Curran, Susan Feeney, Alison Watt, Ciara Cox, Mairead Connor, Zoltan Molnar, David Simpson, Derek Fairley                                                                                                                                                                                                                                                                                                                                                                                                                                                                                                                                         |
| EPI_ISL_998566, EPI_ISL_998567, EPI_ISL_998568, EPI_ISL_998569, EPI_ISL_998570, EPI_ISL_998571                                                                                                                                                                                                                                                                                                                                                                                                                                                                                                                                                                                                                                                                                                                                                                                                                                                                                                                                                                                                                                                                                                                                                                                                                                                                                                                                                                                                                                                                                                                                                                                                                                                                                                                                                                                                 | Northumbria University / South Tees Hospitals NHS Foundation Trust / North Cumbria Integrated Care NHS Foundation Trust / North Tees and Hartlepool NHS Foundation Trust / Newcastle Hospitals NHS Foundation Trust | COVID-19 Genomics UK (COG-UK) Consortium                                  | Darren L Smith, Andrew Nelson, Matthew Bashton, Greg R Young, Joshua Loh, John Allan, Mohammad A Tariq, Giles S Holt, Gary Black, Wen C Yew, Lynn Dover, Paul Baker, Steve Liggett, Sarah Essex, Jane Greenaway, Debra Padgett, Clive Graham, Garren Scott, Edward Barton, Emma Swindells, Brendan Payne, Jennifer Collins, Yusri Taha, Gary Eltringham                                                                                                                                                                                                                                                                                                                                  |
| EPI_ISL_998808, EPI_ISL_998819, EPI_ISL_998845, EPI_ISL_998848, EPI_ISL_998862, EPI_ISL_998863, EPI_ISL_998866                                                                                                                                                                                                                                                                                                                                                                                                                                                                                                                                                                                                                                                                                                                                                                                                                                                                                                                                                                                                                                                                                                                                                                                                                                                                                                                                                                                                                                                                                                                                                                                                                                                                                                                                                                                 | Quadram Institute Bioscience                                                                                                                                                                                        | COVID-19 Genomics UK (COG-UK) Consortium                                  | Dave J. Baker, Gemma L. Kay, Alp Aydin, Thanh Le-Viet, Steven Rudder, Ana P. Tedim, Anastasia Kolyva, Maria Diaz, Leonardo de Oliveira Martins, Nabil-Fareed Alikhan, Lizzie Meadows, Rachael Stanley, Ngozi Elumogo, Muhammed Yasir, Nicholas M. Thomson, Alexander J Trotter, Rachel Gilroy, Samuel Bloomfield, Claire Stuart, Andrew Bell, Reenesh Prakash, Samir Dervisevic, Alison E. Mather, John Wain, Mark Webber, Andrew J. Page, Justin O'Grady                                                                                                                                                                                                                                |
| EPI_ISL_998997, EPI_ISL_998999, EPI_ISL_999000, EPI_ISL_999328                                                                                                                                                                                                                                                                                                                                                                                                                                                                                                                                                                                                                                                                                                                                                                                                                                                                                                                                                                                                                                                                                                                                                                                                                                                                                                                                                                                                                                                                                                                                                                                                                                                                                                                                                                                                                                 | Oxford Viromics, NDM, University of Oxford; Oxford University Hospitals; Basingstoke and North Hampshire Hospital                                                                                                   | COVID-19 Genomics UK (COG-UK) Consortium                                  | Tanya Golubchik, David Bonsall, George Macintyre, Amy Trebes, Mariateresa de Cesare, Catrin Moore, Alex Mobbs, Anita Justice, Robert Shaw, Monique Andersson, Timothy Peto, Emma Wise, Nathan Moore, Jessica Lynch, Nick Cortes, Matilde Mori, Stephen Kidd, David Buck, John Todd, Christophe Fraser                                                                                                                                                                                                                                                                                                                                                                                    |
| EPI_ISL_999516, EPI_ISL_999638, EPI_ISL_999642, EPI_ISL_999643, EPI_ISL_999644, EPI_ISL_999701, EPI_ISL_999702, EPI_ISL_999704, EPI_ISL_999713, EPI_ISL_999714, EPI_ISL_999717, EPI_ISL_999720, EPI_ISL_999724, EPI_ISL_999725, EPI_ISL_999729, EPI_ISL_999824, EPI_ISL_999825, EPI_ISL_999826, EPI_ISL_999830                                                                                                                                                                                                                                                                                                                                                                                                                                                                                                                                                                                                                                                                                                                                                                                                                                                                                                                                                                                                                                                                                                                                                                                                                                                                                                                                                                                                                                                                                                                                                                                 |                                                                                                                                                                                                                     |                                                                           |                                                                                                                                                                                                                                                                                                                                                                                                                                                                                                                                                                                                                                                                                          |
| see above                                                                                                                                                                                                                                                                                                                                                                                                                                                                                                                                                                                                                                                                                                                                                                                                                                                                                                                                                                                                                                                                                                                                                                                                                                                                                                                                                                                                                                                                                                                                                                                                                                                                                                                                                                                                                                                                                      | Originating lab: Wales Specialist Virology Centre Sequencing lab: Pathogen Genomics Unit                                                                                                                            | Public Health Wales Microbiology Cardiff Wales Specialist Virology Centre | Catherine Moore, Johnathan Evans, Laura Gifford, Malorie Perry, Simon Cottrell, Angela Marchbank, Alec Birchley, Alexander Adams, Amy Gaskin, Bree Gatica-Wilcox, Jason Coombes, Joel Southgate, Lauren Gilbert, Lee Graham, Nicole Pacchiarini, Sara Kumziene-Summerhayes, Sarah Taylor, Sophie Jones, Sara Rey, Matthew Bull, Joanne Watkins, Sally Corden, Tom Connor                                                                                                                                                                                                                                                                                                                 |
