# Supplementary material for: Inferring the Association between the Risk of COVID-19 Case Fatality and N501Y Substitution in SARS-CoV-2
Source: MDPI journal article supplement (doi:10.3390/v13040638), 2021-04-08
Supplement: s1 [file s1]

We gratefully acknowledge the following Authors from the Originating laboratories responsible for obtaining the specimens, as well as the Submitting laboratories where the genome data were generated and shared via GISAID, on which this research is based.

All Submitters of data may be contacted directly via [www.gisaid.org](http://www.gisaid.org)

Authors are sorted alphabetically.

| Accession ID                                                                                                                                                                                                                                                                                                                                                                                                                                                                                                                                                                                                                       | Originating Laboratory                                                                                                                                                           | Submitting Laboratory                                                      | Authors                                                                                                                                                                                                                                                                                                                                                                                                                                 |
|------------------------------------------------------------------------------------------------------------------------------------------------------------------------------------------------------------------------------------------------------------------------------------------------------------------------------------------------------------------------------------------------------------------------------------------------------------------------------------------------------------------------------------------------------------------------------------------------------------------------------------|----------------------------------------------------------------------------------------------------------------------------------------------------------------------------------|----------------------------------------------------------------------------|-----------------------------------------------------------------------------------------------------------------------------------------------------------------------------------------------------------------------------------------------------------------------------------------------------------------------------------------------------------------------------------------------------------------------------------------|
| EPI_ISL_1000248, EPI_ISL_1000249, EPI_ISL_1000250, EPI_ISL_1000251, EPI_ISL_1000253, EPI_ISL_1000254, EPI_ISL_1000259, EPI_ISL_1000263, EPI_ISL_1000455, EPI_ISL_1000626                                                                                                                                                                                                                                                                                                                                                                                                                                                           | Centre for Enzyme Innovation, University of Portsmouth / Translational Research Laboratory, Portsmouth Hospitals NHS Trust                                                       | COVID-19 Genomics UK (COG-UK) Consortium                                   | Angela Beckett,Salman Goudarzi,Christopher Fearn,Kate Cook,Katie Loveson,Sharon Glaysher,Scott Elliott,Samuel Robson                                                                                                                                                                                                                                                                                                                    |
| EPI_ISL_1000641, EPI_ISL_1000703, EPI_ISL_1000706, EPI_ISL_1000725                                                                                                                                                                                                                                                                                                                                                                                                                                                                                                                                                                 | Virology Department, Sheffield Teaching Hospitals NHS Foundation Trust/Department of Infection, Immunity and Cardiovascular Disease, The Medical School, University of Sheffield | COVID-19 Genomics UK (COG-UK) Consortium                                   | Thushan de Silva, Matthew Parker, Nikki Smith, Adri Angyal, Rebecca Brown, Luke Green, Rachel Tucker, Paul Parsons, Danielle Groves, Katie Johnson, Laura Carrilero, Alex Keeley, Dave Partridge, Matthew Wyles, Benjamin Lindsey, Mehmet Yavuz, Mohammad Raza, Cariad Evans                                                                                                                                                            |
| EPI_ISL_1000795, EPI_ISL_1000796, EPI_ISL_1000797, EPI_ISL_1000798, EPI_ISL_1000799, EPI_ISL_1000800, EPI_ISL_1000801, EPI_ISL_1000802, EPI_ISL_1000803, EPI_ISL_1000804, EPI_ISL_1000805, EPI_ISL_1000807, EPI_ISL_1000809, EPI_ISL_1000810, EPI_ISL_1000812, EPI_ISL_1000813, EPI_ISL_1000814, EPI_ISL_1000815, EPI_ISL_1000817, EPI_ISL_1000818, EPI_ISL_1000820, EPI_ISL_1000821, EPI_ISL_1000823, EPI_ISL_1000824, EPI_ISL_1000825, EPI_ISL_1000827, EPI_ISL_1000828, EPI_ISL_1000829, EPI_ISL_1000830, EPI_ISL_1000831, EPI_ISL_1000891, EPI_ISL_1000894, EPI_ISL_1000909, EPI_ISL_1000911, EPI_ISL_1000963                  |                                                                                                                                                                                  |                                                                            |                                                                                                                                                                                                                                                                                                                                                                                                                                         |
| see above                                                                                                                                                                                                                                                                                                                                                                                                                                                                                                                                                                                                                          | Bioinformatics and Biostatistics Lab, Advanced Sequencing Facility                                                                                                               | COVID-19 Genomics UK (COG-UK) Consortium                                   | Aengus Stewart,Jerome Nicod,Chelsea Sawyer,Laura Cubitt,Harshil Patel,Margaret Crawford                                                                                                                                                                                                                                                                                                                                                 |
| EPI_ISL_1007525                                                                                                                                                                                                                                                                                                                                                                                                                                                                                                                                                                                                                    | Lighthouse Lab in Cambridge                                                                                                                                                      | Wellcome Sanger Institute for the COVID-19 Genomics UK (COG-UK) Consortium | Rob Howes, The Lighthouse Lab in Cambridge and Alex Alderton, Roberto Amato, Sonia Goncalves, Ewan Harrison, David K. Jackson, Ian Johnston, Dominic Kwiatkowski, Cordelia Langford, John Sillitoe on behalf of the Wellcome Sanger Institute COVID-19 Surveillance Team                                                                                                                                                                |
| EPI_ISL_1007566, EPI_ISL_1007567, EPI_ISL_1012754, EPI_ISL_1012762, EPI_ISL_1012787, EPI_ISL_1012788, EPI_ISL_1012789, EPI_ISL_1012790, EPI_ISL_1012791, EPI_ISL_1012792, EPI_ISL_1012793, EPI_ISL_1012794, EPI_ISL_1012795, EPI_ISL_1012796, EPI_ISL_1012797, EPI_ISL_1012798, EPI_ISL_1012799, EPI_ISL_1012800, EPI_ISL_1012801, EPI_ISL_1012802, EPI_ISL_1012803, EPI_ISL_1012804, EPI_ISL_1012805, EPI_ISL_1012806                                                                                                                                                                                                             |                                                                                                                                                                                  |                                                                            |                                                                                                                                                                                                                                                                                                                                                                                                                                         |
| see above                                                                                                                                                                                                                                                                                                                                                                                                                                                                                                                                                                                                                          | Lighthouse Lab in Alderley Park                                                                                                                                                  | Wellcome Sanger Institute for the COVID-19 Genomics UK (COG-UK) Consortium | Jacquelyn Wynn, Mairead Hyland, The Lighthouse Lab in Alderley Park and Alex Alderton, Roberto Amato, Sonia Goncalves, Ewan Harrison, David K. Jackson, Ian Johnston, Dominic Kwiatkowski, Cordelia Langford, John Sillitoe on behalf of the Wellcome Sanger Institute COVID-19 Surveillance Team                                                                                                                                       |
| EPI_ISL_1012808                                                                                                                                                                                                                                                                                                                                                                                                                                                                                                                                                                                                                    | Lighthouse Lab in Glasgow                                                                                                                                                        | Wellcome Sanger Institute for the COVID-19 Genomics UK (COG-UK) Consortium | Harper VanSteenhouse, Yumi Kasai, David Gray, Carol Clugston, Anna Dominiczak and Alex Alderton, Roberto Amato, Sonia Goncalves, Ewan Harrison, David K. Jackson, Ian Johnston, Dominic Kwiatkowski, Cordelia Langford, John Sillitoe on behalf of the Wellcome Sanger Institute COVID-19 Surveillance Team                                                                                                                             |
| EPI_ISL_1012809, EPI_ISL_1012817, EPI_ISL_1012820, EPI_ISL_1012826, EPI_ISL_1012829, EPI_ISL_1012830, EPI_ISL_1012835, EPI_ISL_1012841, EPI_ISL_1012842, EPI_ISL_1012843, EPI_ISL_1012847, EPI_ISL_1012848, EPI_ISL_1012850                                                                                                                                                                                                                                                                                                                                                                                                        |                                                                                                                                                                                  |                                                                            |                                                                                                                                                                                                                                                                                                                                                                                                                                         |
| see above                                                                                                                                                                                                                                                                                                                                                                                                                                                                                                                                                                                                                          | Lighthouse Lab in Alderley Park                                                                                                                                                  | Wellcome Sanger Institute for the COVID-19 Genomics UK (COG-UK) Consortium | Jacquelyn Wynn, Mairead Hyland, The Lighthouse Lab in Alderley Park and Alex Alderton, Roberto Amato, Sonia Goncalves, Ewan Harrison, David K. Jackson, Ian Johnston, Dominic Kwiatkowski, Cordelia Langford, John Sillitoe on behalf of the Wellcome Sanger Institute COVID-19 Surveillance Team                                                                                                                                       |
| EPI_ISL_1019608, EPI_ISL_1019615, EPI_ISL_1019628, EPI_ISL_1019641, EPI_ISL_1019666, EPI_ISL_1019667, EPI_ISL_1019690, EPI_ISL_1019706, EPI_ISL_1019711, EPI_ISL_1019730, EPI_ISL_1019732, EPI_ISL_1019741, EPI_ISL_1019744, EPI_ISL_1019747, EPI_ISL_1019754, EPI_ISL_1019781, EPI_ISL_1019782, EPI_ISL_1019784, EPI_ISL_1019786, EPI_ISL_1019787, EPI_ISL_1019789, EPI_ISL_1019791, EPI_ISL_1019792, EPI_ISL_1019794, EPI_ISL_1019796, EPI_ISL_1019797, EPI_ISL_1019799, EPI_ISL_1019801, EPI_ISL_1019802, EPI_ISL_1019804, EPI_ISL_1019806, EPI_ISL_1019808, EPI_ISL_1019809, EPI_ISL_1019811, EPI_ISL_1019812, EPI_ISL_1019814 |                                                                                                                                                                                  |                                                                            |                                                                                                                                                                                                                                                                                                                                                                                                                                         |
| see above                                                                                                                                                                                                                                                                                                                                                                                                                                                                                                                                                                                                                          | Lighthouse Lab in Glasgow                                                                                                                                                        | Wellcome Sanger Institute for the COVID-19 Genomics UK (COG-UK) Consortium | Harper VanSteenhouse, Yumi Kasai, David Gray, Carol Clugston, Anna Dominiczak and Alex Alderton, Roberto Amato, Jeffrey Barrett, Sonia Goncalves, Ewan Harrison, David K. Jackson, Ian Johnston, Dominic Kwiatkowski, Cordelia Langford, John Sillitoe on behalf of the Wellcome Sanger Institute COVID-19 Surveillance Team                                                                                                            |
| EPI_ISL_1043901                                                                                                                                                                                                                                                                                                                                                                                                                                                                                                                                                                                                                    | Lighthouse Lab in Alderley Park                                                                                                                                                  | Wellcome Sanger Institute for the COVID-19 Genomics UK (COG-UK) Consortium | Jacquelyn Wynn, Mairead Hyland, The Lighthouse Lab in Alderley Park and Alex Alderton, Roberto Amato, Jeffrey Barrett, Sonia Goncalves, Ewan Harrison, David K. Jackson, Ian Johnston, Dominic Kwiatkowski, Cordelia Langford, John Sillitoe on behalf of the Wellcome Sanger Institute COVID-19 Surveillance Team                                                                                                                      |
| EPI_ISL_1046238, EPI_ISL_1046310, EPI_ISL_1046322                                                                                                                                                                                                                                                                                                                                                                                                                                                                                                                                                                                  | Randox Laboratories                                                                                                                                                              | Wellcome Sanger Institute for the COVID-19 Genomics UK (COG-UK) Consortium | Randox Laboratories and Alex Alderton, Roberto Amato, Jeffrey Barrett, Sonia Goncalves, Ewan Harrison, David K. Jackson, Ian Johnston, Dominic Kwiatkowski, Cordelia Langford, John Sillitoe on behalf of the Wellcome Sanger Institute COVID-19 Surveillance Team                                                                                                                                                                      |
| EPI_ISL_1046991, EPI_ISL_1047001, EPI_ISL_1047004, EPI_ISL_1047005, EPI_ISL_1047007, EPI_ISL_1047008, EPI_ISL_1047009, EPI_ISL_1047022, EPI_ISL_1047062                                                                                                                                                                                                                                                                                                                                                                                                                                                                            | University of Birmingham                                                                                                                                                         | COVID-19 Genomics UK (COG-UK) Consortium                                   | Institute of Microbiology, University of Birmingham: Claire McMurray, Joanne Stockton, Samuel Nicholls, Radoslaw Poplawski, Will Rowe, Josh Quick, Nicholas Loman. University of Birmingham Testing Laboratory: Celina M Whalley, Andrew Bosworth, Charlotte Poxon, Kasun Wanigasooriya, Oliver Pickles, Mike Kidd, Alex Richter, Andrew D Beggs PHE Heartlands Lab: Husam Osman, Andrew Bosworth. Queen Elizabeth Hospital: Anna Casey |
| EPI_ISL_1047184, EPI_ISL_1047187, EPI_ISL_1047191, EPI_ISL_1047331, EPI_ISL_1047511                                                                                                                                                                                                                                                                                                                                                                                                                                                                                                                                                | Department of Pathology, University of Cambridge                                                                                                                                 | COVID-19 Genomics UK (COG-UK) Consortium                                   | Aminu S. Jahun, Yasmin Chaudhry, Iliana Georgana, Myra Hosmillo, Rhys Izuagbe, William L. Hamilton, Martin D. Curran, Surendra Parmar, Ian Goodfellow                                                                                                                                                                                                                                                                                   |
| EPI_ISL_1047647, EPI_ISL_1047648, EPI_ISL_1047649, EPI_ISL_1047650, EPI_ISL_1047651, EPI_ISL_1047652, EPI_ISL_1047653, EPI_ISL_1047654, EPI_ISL_1047655, EPI_ISL_1047656, EPI_ISL_1047657, EPI_ISL_1047658, EPI_ISL_1047659, EPI_ISL_1047660, EPI_ISL_1047661, EPI_ISL_1047662, EPI_ISL_1047663, EPI_ISL_1047664, EPI_ISL_1047665, EPI_ISL_1047666, EPI_ISL_1047667, EPI_ISL_1047668, EPI_ISL_1047669, EPI_ISL_1047670, EPI_ISL_1047671, EPI_ISL_1047672, EPI_ISL_1047673, EPI_ISL_1047674, EPI_ISL_1047675, EPI_ISL_1047676, EPI_ISL_1047677, EPI_ISL_1047678                                                                     |                                                                                                                                                                                  |                                                                            |                                                                                                                                                                                                                                                                                                                                                                                                                                         |
| see above                                                                                                                                                                                                                                                                                                                                                                                                                                                                                                                                                                                                                          | Virology Department, Sheffield Teaching Hospitals NHS Foundation Trust/Department of Infection, Immunity and Cardiovascular Disease, The Medical School, University of Sheffield | COVID-19 Genomics UK (COG-UK) Consortium                                   | Thushan de Silva, Matthew Parker, Nikki Smith, Adri Angyal, Rebecca Brown, Luke Green, Rachel Tucker, Paul Parsons, Danielle Groves, Katie Johnson, Laura Carrilero, Alex Keeley, Dave Partridge, Matthew Wyles, Benjamin Lindsey, Mehmet Yavuz, Mohammad Raza, Cariad Evans                                                                                                                                                            |
| EPI_ISL_1047836                                                                                                                                                                                                                                                                                                                                                                                                                                                                                                                                                                                                                    | West of Scotland Specialist Virology Centre, NHSGGC / MRC-University of Glasgow Centre for Virus Research                                                                        | COVID-19 Genomics UK (COG-UK) Consortium                                   | Ana da Silva Filipe, Natasha Johnson, Kathy Smollett, Daniel Mair, Stephen Carmichael, Alice Broos, Lily Tong, Jenna Nichols, Kyriaki Nomikou; Sarah McDonald; Richard Orton, Joseph Hughes, Sreenu Vattipally, David L Robertson; Alasdair MacLean, Rory Gunson; Sharif Shaaban, Matthew Holden; Rachel Blacow, Guy Mollett, Kathy Li, James Shepherd, Antonia Ho, Emma Thomson                                                        |
| EPI_ISL_1047893                                                                                                                                                                                                                                                                                                                                                                                                                                                                                                                                                                                                                    | Virology Department, Royal Infirmary of Edinburgh, NHS Lothian / School of Biological Sciences, University of Edinburgh                                                          | COVID-19 Genomics UK (COG-UK) Consortium                                   | McHugh M, Dewar R, Cotton S, Rooke S, O'Toole Á, Scher E, Hill V, McCrone JT, Colquhoun R, Yu X, Jackson B, Rambaut A, Templeton K                                                                                                                                                                                                                                                                                                      |
| EPI_ISL_1048078, EPI_ISL_1048083, EPI_ISL_1048095                                                                                                                                                                                                                                                                                                                                                                                                                                                                                                                                                                                  | Barts Health NHS Trust                                                                                                                                                           | COVID-19 Genomics UK (COG-UK) Consortium                                   | CUTINO-MOGUEL, Maria-Teresa; HARRINGTON, David; OWOYEMI, Dola; KULASEGARAN-SHYLINI, Raghavendran; BROAD, Claire; KELE, Beatrix                                                                                                                                                                                                                                                                                                          |
| EPI_ISL_1050224, EPI_ISL_1050226, EPI_ISL_1050228, EPI_ISL_1050229, EPI_ISL_1050230, EPI_ISL_1050231, EPI_ISL_1050232                                                                                                                                                                                                                                                                                                                                                                                                                                                                                                              | Lighthouse Lab in Glasgow / MRC-University of Glasgow Centre for Virus Research                                                                                                  | COVID-19 Genomics UK (COG-UK) Consortium                                   | Ana da Silva Filipe, Natasha Johnson, Kathy Smollett, Daniel Mair, Stephen Carmichael, Alice Broos, Lily Tong, Jenna Nichols, Kyriaki Nomikou; Sarah McDonald; Harper VanSteenhouse, Yumi Kasai, David Gray, Carol Clugston, Anna Dominiczak; Alasdair MacLean, Rory Gunson; Richard Orton, Joseph Hughes, Sreenu Vattipally, David L Robertson; Sharif Shaaban, Matthew Holden; Kathy Li, James Shepherd, Antonia Ho, Emma Thomson     |
| EPI_ISL_1050241                                                                                                                                                                                                                                                                                                                                                                                                                                                                                                                                                                                                                    | West of Scotland Specialist Virology Centre, NHSGGC /                                                                                                                            | COVID-19 Genomics UK (COG-UK) Consortium                                   | Ana da Silva Filipe, Natasha Johnson, Kathy Smollett, Daniel Mair, Stephen Carmichael, Alice Broos, Lily Tong, Jenna Nichols, Kyriaki Nomikou; Sarah                                                                                                                                                                                                                                                                                    |

|                                                                                                                                                                                                                                                                                                                                                                                                                                                                           |                                                                                                                                                                                                                     |                                                                                                                            |                                                                                                                                                                                                                                                                                                                                                                                                                                                                                                                                                                                                                                                                                                           |
|---------------------------------------------------------------------------------------------------------------------------------------------------------------------------------------------------------------------------------------------------------------------------------------------------------------------------------------------------------------------------------------------------------------------------------------------------------------------------|---------------------------------------------------------------------------------------------------------------------------------------------------------------------------------------------------------------------|----------------------------------------------------------------------------------------------------------------------------|-----------------------------------------------------------------------------------------------------------------------------------------------------------------------------------------------------------------------------------------------------------------------------------------------------------------------------------------------------------------------------------------------------------------------------------------------------------------------------------------------------------------------------------------------------------------------------------------------------------------------------------------------------------------------------------------------------------|
| MRC-University of Glasgow Centre for Virus Research                                                                                                                                                                                                                                                                                                                                                                                                                       |                                                                                                                                                                                                                     |                                                                                                                            | McDonald; Richard Orton, Joseph Hughes, Sreenu Vattipally, David L Robertson; Alasdair MacLean, Rory Gunson; Sharif Shaaban, Matthew Holden; Rachel Blacow, Guy Mollett, Kathy Li, James Shepherd, Antonia Ho, Emma Thomson                                                                                                                                                                                                                                                                                                                                                                                                                                                                               |
| EPI_ISL_1051431, EPI_ISL_1051435, EPI_ISL_1051436, EPI_ISL_1051441, EPI_ISL_1051452, EPI_ISL_1051484, EPI_ISL_1051490, EPI_ISL_1051506                                                                                                                                                                                                                                                                                                                                    | Quadram Institute Bioscience                                                                                                                                                                                        | COVID-19 Genomics UK (COG-UK) Consortium                                                                                   | Dave J. Baker, Gemma L. Kay, Alp Aydin, Thanh Le-Viet, Steven Rudder, Ana P. Tedim, Anastasia Kolyva, Maria Diaz, Leonardo de Oliveira Martins, Nabil-Fareed Alikhan, Lizzie Meadows, Rachael Stanley, Ngozi Elumogo, Muhammed Yasir, Nicholas M. Thomson, Alexander J Trotter, Rachel Gilroy, Samuel Bloomfield, Claire Stuart, Andrew Bell, Reenesh Prakash, Samir Dervisevic, Alison E. Mather, John Wain, Mark Webber, Andrew J. Page, Justin O'Grady                                                                                                                                                                                                                                                 |
| EPI_ISL_1051594, EPI_ISL_1051601, EPI_ISL_1051860, EPI_ISL_1051861, EPI_ISL_1051862, EPI_ISL_1051870, EPI_ISL_1051871, EPI_ISL_1051885, EPI_ISL_1051886, EPI_ISL_1051887                                                                                                                                                                                                                                                                                                  | Oxford Viromics, NDM, University of Oxford; Oxford University Hospitals; Basingstoke and North Hampshire Hospital                                                                                                   | COVID-19 Genomics UK (COG-UK) Consortium                                                                                   | Tanya Golubchik, David Bonsall, George Macintyre, Amy Trebes, Mariateresa de Cesare, Catrin Moore, Alex Mobbs, Anita Justice, Robert Shaw, Monique Andersson, Timothy Peto, Emma Wise, Nathan Moore, Jessica Lynch, Nick Cortes, Matilde Mori, Stephen Kidd, David Buck, John Todd, Christophe Fraser                                                                                                                                                                                                                                                                                                                                                                                                     |
| EPI_ISL_1052463, EPI_ISL_1052464, EPI_ISL_1052466, EPI_ISL_1052467, EPI_ISL_1052468, EPI_ISL_1052489, EPI_ISL_1052490, EPI_ISL_1052491, EPI_ISL_1052496, EPI_ISL_1052502, EPI_ISL_1052504, EPI_ISL_1052505, EPI_ISL_1052506, EPI_ISL_1052507, EPI_ISL_1052508, EPI_ISL_1052509, EPI_ISL_1052510, EPI_ISL_1053525, EPI_ISL_1053547                                                                                                                                         | see above                                                                                                                                                                                                           | Originating lab: Wales Specialist Virology Centre Sequencing lab: Pathogen Genomics Unit                                   | Public Health Wales Microbiology Cardiff Wales Specialist Virology Centre                                                                                                                                                                                                                                                                                                                                                                                                                                                                                                                                                                                                                                 |
| see above                                                                                                                                                                                                                                                                                                                                                                                                                                                                 | Originating lab: Wales Specialist Virology Centre Sequencing lab: Pathogen Genomics Unit                                                                                                                            | Public Health Wales Microbiology Cardiff Wales Specialist Virology Centre                                                  | Catherine Moore, Johnathan Evans, Laura Gifford, Malorie Perry, Simon Cottrell, Angela Marchbank, Alec Birchley, Alexander Adams, Amy Gaskin, Bree Gatica-Wilcox, Jason Coombes, Joel Southgate, Lauren Gilbert, Lee Graham, Nicole Pacchiarini, Sara Kumziene-Summerhayes, Sarah Taylor, Sophie Jones, Sara Rey, Matthew Bull, Joanne Watkins, Sally Corden, Tom Connor                                                                                                                                                                                                                                                                                                                                  |
| EPI_ISL_1053828, EPI_ISL_1053829, EPI_ISL_1053830, EPI_ISL_1053831, EPI_ISL_1053832, EPI_ISL_1053833, EPI_ISL_1053834, EPI_ISL_1053835, EPI_ISL_1053836, EPI_ISL_1053837, EPI_ISL_1053838, EPI_ISL_1053839, EPI_ISL_1053891, EPI_ISL_1053934, EPI_ISL_1053935, EPI_ISL_1053936, EPI_ISL_1053937                                                                                                                                                                           | see above                                                                                                                                                                                                           | Centre for Enzyme Innovation, University of Portsmouth / Translational Research Laboratory, Portsmouth Hospitals NHS Trust | COVID-19 Genomics UK (COG-UK) Consortium                                                                                                                                                                                                                                                                                                                                                                                                                                                                                                                                                                                                                                                                  |
| EPI_ISL_1054664                                                                                                                                                                                                                                                                                                                                                                                                                                                           | Virology Department, Sheffield Teaching Hospitals NHS Foundation Trust/Department of Infection, Immunity and Cardiovascular Disease, The Medical School, University of Sheffield                                    | COVID-19 Genomics UK (COG-UK) Consortium                                                                                   | Thushan de Silva, Matthew Parker, Nikki Smith, Adri Angyal, Rebecca Brown, Luke Green, Rachel Tucker, Paul Parsons, Danielle Groves, Katie Johnson, Laura Carrilero, Alex Keeley, Dave Partridge, Matthew Wyles, Benjamin Lindsey, Mehmet Yavuz, Mohammad Raza, Cariad Evans                                                                                                                                                                                                                                                                                                                                                                                                                              |
| EPI_ISL_1054721, EPI_ISL_1054724, EPI_ISL_1054730, EPI_ISL_1054731, EPI_ISL_1054732, EPI_ISL_1054733, EPI_ISL_1054734, EPI_ISL_1054735, EPI_ISL_1054736, EPI_ISL_1054737, EPI_ISL_1054738, EPI_ISL_1054739, EPI_ISL_1054740, EPI_ISL_1054741, EPI_ISL_1054742, EPI_ISL_1054743, EPI_ISL_1054744, EPI_ISL_1054745, EPI_ISL_1054746, EPI_ISL_1054747, EPI_ISL_1054748, EPI_ISL_1054749, EPI_ISL_1054750, EPI_ISL_1054753, EPI_ISL_1054754, EPI_ISL_1054755, EPI_ISL_1054818 | see above                                                                                                                                                                                                           | Bioinformatics and Biostatistics Lab, Advanced Sequencing Facility                                                         | COVID-19 Genomics UK (COG-UK) Consortium                                                                                                                                                                                                                                                                                                                                                                                                                                                                                                                                                                                                                                                                  |
| EPI_ISL_1057732, EPI_ISL_1057745                                                                                                                                                                                                                                                                                                                                                                                                                                          | Lighthouse Lab in Alderley Park                                                                                                                                                                                     | Wellcome Sanger Institute for the COVID-19 Genomics UK (COG-UK) Consortium                                                 | Jacquelyn Wynn, Mairead Hyland, The Lighthouse Lab in Alderley Park and Alex Alderton, Roberto Amato, Jeffrey Barrett, Sonia Goncalves, Ewan Harrison, David K. Jackson, Ian Johnston, Dominic Kwiatkowski, Cordelia Langford, John Sillitoe on behalf of the Wellcome Sanger Institute COVID-19 Surveillance Team                                                                                                                                                                                                                                                                                                                                                                                        |
| EPI_ISL_1104114, EPI_ISL_1104115, EPI_ISL_1104116, EPI_ISL_1104117, EPI_ISL_1104118, EPI_ISL_1104119, EPI_ISL_1104120, EPI_ISL_1104121, EPI_ISL_1104122                                                                                                                                                                                                                                                                                                                   | Lighthouse Lab in Glasgow / MRC-University of Glasgow Centre for Virus Research                                                                                                                                     | COVID-19 Genomics UK (COG-UK) Consortium                                                                                   | Ana da Silva Filipe, Natasha Johnson, Kathy Smollett, Daniel Mair, Stephen Carmichael, Alice Broos, Lily Tong, Jenna Nichols, Kyriaki Nomikou; Sarah McDonald; Harper VanSteenhouse, Yumi Kasai, David Gray, Carol Clugston, Anna Dominiczak; Alasdair MacLean, Rory Gunson; Richard Orton, Joseph Hughes, Sreenu Vattipally, David L Robertson; Sharif Shaaban, Matthew Holden; Kathy Li, James Shepherd, Antonia Ho, Emma Thomson                                                                                                                                                                                                                                                                       |
| EPI_ISL_1104219, EPI_ISL_1104229, EPI_ISL_1104262, EPI_ISL_1104263                                                                                                                                                                                                                                                                                                                                                                                                        | Virology Department, Royal Infirmary of Edinburgh, NHS Lothian / School of Biological Sciences, University of Edinburgh                                                                                             | COVID-19 Genomics UK (COG-UK) Consortium                                                                                   | McHugh M, Dewar R, Cotton S, Rooke S, O'Toole Á, Scher E, Hill V, McCrone JT, Colquhoun R, Yu X, Jackson B, Rambaut A, Templeton K                                                                                                                                                                                                                                                                                                                                                                                                                                                                                                                                                                        |
| EPI_ISL_1104343, EPI_ISL_1104354, EPI_ISL_1104356, EPI_ISL_1104357, EPI_ISL_1104363, EPI_ISL_1104369, EPI_ISL_1104370, EPI_ISL_1104371, EPI_ISL_1104372, EPI_ISL_1104374, EPI_ISL_1104375, EPI_ISL_1104376, EPI_ISL_1104377, EPI_ISL_1104379                                                                                                                                                                                                                              | see above                                                                                                                                                                                                           | Liverpool Clinical Laboratories                                                                                            | COVID-19 Genomics UK (COG-UK) Consortium                                                                                                                                                                                                                                                                                                                                                                                                                                                                                                                                                                                                                                                                  |
| EPI_ISL_1104799, EPI_ISL_1104804, EPI_ISL_1104806, EPI_ISL_1104812, EPI_ISL_1104814, EPI_ISL_1104822, EPI_ISL_1104828, EPI_ISL_1104831, EPI_ISL_1105043, EPI_ISL_1105079, EPI_ISL_1105084, EPI_ISL_1105091, EPI_ISL_1105115, EPI_ISL_1105159, EPI_ISL_1105168, EPI_ISL_1105176, EPI_ISL_1105219, EPI_ISL_1105250, EPI_ISL_1105292, EPI_ISL_1105341                                                                                                                        | see above                                                                                                                                                                                                           | University College London Hospital                                                                                         | COVID-19 Genomics UK (COG-UK) Consortium                                                                                                                                                                                                                                                                                                                                                                                                                                                                                                                                                                                                                                                                  |
| EPI_ISL_1105470                                                                                                                                                                                                                                                                                                                                                                                                                                                           | University College London, Great Ormond Street Hospital for Children NHS Foundation Trust, Imperial College Healthcare NHS Trust                                                                                    | COVID-19 Genomics UK (COG-UK) Consortium                                                                                   | Sergi Castellano, Rachel Williams, Mark Kristiansen, Paola Resende Silva, Sunando Roy, Tony Brooks, Helena Tutill, Paola Niola, Patricia Dyal, Charlotte Williams, Leysa Forrest, Yasmin Panchbhaya, Jacqueline Findlay, Samuel Weeks, Julianne Brown, Kathryn Harris, Paul Randell, James Price, Alison Holmes, Judith Breuer                                                                                                                                                                                                                                                                                                                                                                            |
| EPI_ISL_1105847, EPI_ISL_1105848, EPI_ISL_1105849, EPI_ISL_1105850                                                                                                                                                                                                                                                                                                                                                                                                        | Lincolnshire Hospitals and DeepSeq Nottingham                                                                                                                                                                       | COVID-19 Genomics UK (COG-UK) Consortium                                                                                   | Nichola Duckworth, Tim Sloan, Sarah Walsh, Jonathan Ball, Patrick McClure, Joseph Chappell, Nadine Holmes, Matthew Carlisle, Christopher Moore, Fei Sang, Johnny Debebe, Victoria Wright, Matthew Loose                                                                                                                                                                                                                                                                                                                                                                                                                                                                                                   |
| EPI_ISL_1107637, EPI_ISL_1107697                                                                                                                                                                                                                                                                                                                                                                                                                                          | Centre for Enzyme Innovation, University of Portsmouth / Translational Research Laboratory, Portsmouth Hospitals NHS Trust                                                                                          | COVID-19 Genomics UK (COG-UK) Consortium                                                                                   | Angela Beckett, Salman Goudarzi, Christopher Fearn, Kate Cook, Katie Loveson, Sharon Glaysheer, Scott Elliott, Samuel Robson                                                                                                                                                                                                                                                                                                                                                                                                                                                                                                                                                                              |
| EPI_ISL_1177691, EPI_ISL_1177727, EPI_ISL_1177728, EPI_ISL_1177730, EPI_ISL_1177732                                                                                                                                                                                                                                                                                                                                                                                       | Virology Department, Royal Infirmary of Edinburgh, NHS Lothian / School of Biological Sciences, University of Edinburgh                                                                                             | COVID-19 Genomics UK (COG-UK) Consortium                                                                                   | McHugh M, Dewar R, Cotton S, Rooke S, O'Toole Á, Scher E, Hill V, McCrone JT, Colquhoun R, Yu X, Jackson B, Rambaut A, Templeton K                                                                                                                                                                                                                                                                                                                                                                                                                                                                                                                                                                        |
| EPI_ISL_1177888, EPI_ISL_1177904                                                                                                                                                                                                                                                                                                                                                                                                                                          | Liverpool Clinical Laboratories                                                                                                                                                                                     | COVID-19 Genomics UK (COG-UK) Consortium                                                                                   | Sam Haldenby, Alistair Darby, Steve Paterson, Anita Lucaci, Julian Hiscox, M Almsaud, A Alrezaihi, Muhannad Alruwaili, Stuart D Armstrong, Jones Benjamin, Eleanor G Bentley, Anu Chawla, Jordan J Clark, Angela Cowell, Richard Eccles, Isabel Garcia-Dorival, Matthew Gemmell, Alessandro Gerada, PKF Gilmore, Richard Gregory, Ximeng Han, Catherine Hartley, Margaret Hughes, Miren Iturriza-Gomara, James Johnson, L Luu, Jenifer Manson, Charlotte Nelson, Elaine O'Toole, Cassie Olateju, Rebekah Penrice-Randal, Lucille Rainbow, N.P Randle, Trevor Ian Robinson, Parul Sharma, Ghada T Shawli, James P Stewart, Neil Swainston, Ecaterina Vamos, Joanne Watts, Mark Whitehead, Hermione Webster |
| EPI_ISL_1178237, EPI_ISL_1178240, EPI_ISL_1178244, EPI_ISL_1178253, EPI_ISL_1178258, EPI_ISL_1178267, EPI_ISL_1178287, EPI_ISL_1178288, EPI_ISL_1178289, EPI_ISL_1178290                                                                                                                                                                                                                                                                                                  | Northumbria University / South Tees Hospitals NHS Foundation Trust / North Cumbria Integrated Care NHS Foundation Trust / North Tees and Hartlepool NHS Foundation Trust / Newcastle Hospitals NHS Foundation Trust | COVID-19 Genomics UK (COG-UK) Consortium                                                                                   | Darren L Smith, Andrew Nelson, Matthew Bashton, Greg R Young, Joshua Loh, John Allan, Mohammad A Tariq, Giles S Holt, Gary Black, Wen C Yew, Lynn Dover, Paul Baker, Steve Liggett, Sarah Essex, Jane Greenaway, Debra Padgett, Clive Graham, Garren Scott, Edward Barton, Emma Swindells, Brendan Payne, Jennifer Collins, Yusra Taha, Gary Eltringham                                                                                                                                                                                                                                                                                                                                                   |
| EPI_ISL_1178440, EPI_ISL_1178451, EPI_ISL_1178461, EPI_ISL_1178466, EPI_ISL_1178473, EPI_ISL_1178479, EPI_ISL_1178481, EPI_ISL_1178485, EPI_ISL_1178486, EPI_ISL_1178489, EPI_ISL_1178490, EPI_ISL_1178491, EPI_ISL_1178492, EPI_ISL_1178494                                                                                                                                                                                                                              | see above                                                                                                                                                                                                           | Quadram Institute Bioscience                                                                                               | COVID-19 Genomics UK (COG-UK) Consortium                                                                                                                                                                                                                                                                                                                                                                                                                                                                                                                                                                                                                                                                  |
| see above                                                                                                                                                                                                                                                                                                                                                                                                                                                                 | Quadram Institute Bioscience                                                                                                                                                                                        | COVID-19 Genomics UK (COG-UK) Consortium                                                                                   | Dave J. Baker, Gemma L. Kay, Alp Aydin, Thanh Le-Viet, Steven Rudder, Ana P. Tedim, Anastasia Kolyva, Maria Diaz, Leonardo de Oliveira Martins, Nabil-Fareed Alikhan, Lizzie Meadows, Rachael Stanley, Ngozi Elumogo, Muhammed Yasir, Nicholas M. Thomson, Alexander J Trotter, Rachel Gilroy, Samuel Bloomfield, Claire Stuart, Andrew Bell, Reenesh Prakash, Samir Dervisevic, Alison E. Mather, John Wain, Mark Webber, Andrew J. Page, Justin O'Grady                                                                                                                                                                                                                                                 |

|                                                                                                                                                                                                                                                                                                                                                                                                                                                                                                                                                                |                                                                                                                                                                                  |                                                                                                                                                                                                                     |                                                                                                                                                                                                                                                                                                                                                                                                                                                                                                                                                                                                                                                                                                            |
|----------------------------------------------------------------------------------------------------------------------------------------------------------------------------------------------------------------------------------------------------------------------------------------------------------------------------------------------------------------------------------------------------------------------------------------------------------------------------------------------------------------------------------------------------------------|----------------------------------------------------------------------------------------------------------------------------------------------------------------------------------|---------------------------------------------------------------------------------------------------------------------------------------------------------------------------------------------------------------------|------------------------------------------------------------------------------------------------------------------------------------------------------------------------------------------------------------------------------------------------------------------------------------------------------------------------------------------------------------------------------------------------------------------------------------------------------------------------------------------------------------------------------------------------------------------------------------------------------------------------------------------------------------------------------------------------------------|
| EPI_ISL_1178688                                                                                                                                                                                                                                                                                                                                                                                                                                                                                                                                                | Lincolnshire Hospitals and DeepSeq Nottingham                                                                                                                                    | COVID-19 Genomics UK (COG-UK) Consortium                                                                                                                                                                            | Nichola Duckworth, Tim Sloan, Sarah Walsh, Jonathan Ball, Patrick McClure, Joseph Chappell, Nadine Holmes, Matthew Carlisle, Christopher Moore, Fei Sang, Johnny Debebe, Victoria Wright, Matthew Loose                                                                                                                                                                                                                                                                                                                                                                                                                                                                                                    |
| EPI_ISL_1178732                                                                                                                                                                                                                                                                                                                                                                                                                                                                                                                                                | Oxford Viromics, NDM, University of Oxford; Oxford University Hospitals; Basingstoke and North Hampshire Hospital                                                                | COVID-19 Genomics UK (COG-UK) Consortium                                                                                                                                                                            | Tanya Golubchik, David Bonsall, George Macintyre, Amy Trebes, Mariateresa de Cesare, Catrin Moore, Alex Mobbs, Anita Justice, Robert Shaw, Monique Andersson, Timothy Peto, Emma Wise, Nathan Moore, Jessica Lynch, Nick Cortes, Matilde Mori, Stephen Kidd, David Buck, John Todd, Christophe Fraser                                                                                                                                                                                                                                                                                                                                                                                                      |
| EPI_ISL_1178890, EPI_ISL_1178891                                                                                                                                                                                                                                                                                                                                                                                                                                                                                                                               | Originating lab: Wales Specialist Virology Centre Sequencing lab: Pathogen Genomics Unit                                                                                         | Public Health Wales Microbiology Cardiff Wales Specialist Virology Centre                                                                                                                                           | Catherine Moore, Johnathan Evans, Laura Gifford, Malorie Perry, Simon Cottrell, Angela Marchbank, Alec Birchley, Alexander Adams, Amy Gaskin, Bree Gatica-Wilcox, Jason Coombes, Joel Southgate, Lauren Gilbert, Lee Graham, Nicole Pacchiarini, Sara Kumziene-Summerhayes, Sarah Taylor, Sophie Jones, Sara Rey, Matthew Bull, Joanne Watkins, Sally Corden, Tom Connor                                                                                                                                                                                                                                                                                                                                   |
| EPI_ISL_1179832                                                                                                                                                                                                                                                                                                                                                                                                                                                                                                                                                | Centre for Enzyme Innovation, University of Portsmouth / Translational Research Laboratory, Portsmouth Hospitals NHS Trust                                                       | COVID-19 Genomics UK (COG-UK) Consortium                                                                                                                                                                            | Angela Beckett, Salman Goudarzi, Christopher Fearn, Kate Cook, Katie Loveson, Sharon Glaysher, Scott Elliott, Samuel Robson                                                                                                                                                                                                                                                                                                                                                                                                                                                                                                                                                                                |
| EPI_ISL_1180072, EPI_ISL_1180075                                                                                                                                                                                                                                                                                                                                                                                                                                                                                                                               | Virology Department, Sheffield Teaching Hospitals NHS Foundation Trust/Department of Infection, Immunity and Cardiovascular Disease, The Medical School, University of Sheffield | COVID-19 Genomics UK (COG-UK) Consortium                                                                                                                                                                            | Thushan de Silva, Matthew Parker, Nikki Smith, Adri Angyal, Rebecca Brown, Luke Green, Rachel Tucker, Paul Parsons, Danielle Groves, Katie Johnson, Laura Carrilero, Alex Keeley, Dave Partridge, Matthew Wyles, Benjamin Lindsey, Mehmet Yavuz, Mohammad Raza, Cariad Evans                                                                                                                                                                                                                                                                                                                                                                                                                               |
| EPI_ISL_1189117                                                                                                                                                                                                                                                                                                                                                                                                                                                                                                                                                | Lighthouse Lab in Alderley Park                                                                                                                                                  | Wellcome Sanger Institute for the COVID-19 Genomics UK (COG-UK) Consortium                                                                                                                                          | Jacquelyn Wynn, Mairead Hyland, The Lighthouse Lab in Alderley Park and Alex Alderton, Roberto Amato, Jeffrey Barrett, Sonia Goncalves, Ewan Harrison, David K. Jackson, Ian Johnston, Dominic Kwiatkowski, Cordelia Langford, John Sillitoe on behalf of the Wellcome Sanger Institute COVID-19 Surveillance Team                                                                                                                                                                                                                                                                                                                                                                                         |
| EPI_ISL_1247603                                                                                                                                                                                                                                                                                                                                                                                                                                                                                                                                                | Department of Pathology, University of Cambridge                                                                                                                                 | COVID-19 Genomics UK (COG-UK) Consortium                                                                                                                                                                            | Aminu S. Jahun, Yasmin Chaudhry, Iliana Georgana, Myra Hosmillo, Rhys Izuagbe, William L. Hamilton, Martin D. Curran, Surendra Parmar, Ian Goodfellow                                                                                                                                                                                                                                                                                                                                                                                                                                                                                                                                                      |
| EPI_ISL_1247719, EPI_ISL_1247721, EPI_ISL_1247722                                                                                                                                                                                                                                                                                                                                                                                                                                                                                                              | Virology Department, Royal Infirmary of Edinburgh, NHS Lothian / School of Biological Sciences, University of Edinburgh                                                          | COVID-19 Genomics UK (COG-UK) Consortium                                                                                                                                                                            | McHugh M, Dewar R, Cotton S, Rooke S, O'Toole Á, Scher E, Hill V, McCrone JT, Colquhoun R, Yu X, Jackson B, Rambaut A, Templeton K                                                                                                                                                                                                                                                                                                                                                                                                                                                                                                                                                                         |
| EPI_ISL_1247815, EPI_ISL_1247816, EPI_ISL_1247817, EPI_ISL_1247818                                                                                                                                                                                                                                                                                                                                                                                                                                                                                             | Liverpool Clinical Laboratories                                                                                                                                                  | COVID-19 Genomics UK (COG-UK) Consortium                                                                                                                                                                            | Sam Haldenby, Alistair Darby, Steve Paterson, Anita Lucaci, Julian Hiscox, M Almsaud, A Alrezaihi, Muhannad Alruwaili, Stuart D Armstrong, Jones Benjamin, Eleanor G Bentley, Anu Chawla, Jordan J Clark, Angela Cowell, Richard Eccles, Isabel Garcia-Dorival, Matthew Gemmell, Alessandro Gerada, PKF Gilmore, Richard Gregory, Ximeng Han, Catherine Hartley, Margaret Hughes, Miren Iturriza-Gomara, James Johnson, L Luu, Jenifer Manson, Charlotte Nelson, Elaine O'Toole, Cassie Olateju, Rebekah Penrice-Randal , Lucille Rainbow, N.P Randle, Trevor Ian Robinson, Parul Sharma, Ghada T Shawli, James P Stewart, Neil Swainston, Ecaterina Vamos, Joanne Watts, Mark Whitehead, Hermione Webster |
| EPI_ISL_1248214, EPI_ISL_1248215, EPI_ISL_1248216, EPI_ISL_1248217, EPI_ISL_1248218, EPI_ISL_1248219, EPI_ISL_1248220, EPI_ISL_1248221, EPI_ISL_1248222, EPI_ISL_1248223, EPI_ISL_1248224, EPI_ISL_1248225, EPI_ISL_1248226, EPI_ISL_1248227, EPI_ISL_1248228, EPI_ISL_1248229, EPI_ISL_1248251, EPI_ISL_1248253, EPI_ISL_1248255                                                                                                                                                                                                                              | see above                                                                                                                                                                        | University College London, Great Ormond Street Hospital for Children NHS Foundation Trust, Imperial College Healthcare NHS Trust                                                                                    | Sergi Castellano, Rachel Williams, Mark Kristiansen, Paola Resende Silva, Sunando Roy, Tony Brooks, Helena Tutill, Paola Niola, Patricia Dyal, Charlotte Williams, Leysa Forrest, Yasmin Panchbhaya, Jacqueline Findlay, Samuel Weeks, Julianne Brown, Kathryn Harris, Paul Randell, James Price, Alison Holmes, Judith Breuer                                                                                                                                                                                                                                                                                                                                                                             |
| EPI_ISL_1248451, EPI_ISL_1248488                                                                                                                                                                                                                                                                                                                                                                                                                                                                                                                               | University College London Hospital                                                                                                                                               | COVID-19 Genomics UK (COG-UK) Consortium                                                                                                                                                                            | Dr Judith Heaney, Matthew Byott, Dr Catherine Houlihan, Dr Daniel Frampton, Stuart Kirk, Dr Moira Spyer, Dr Paul Grant and Dr Eleni Nastouli                                                                                                                                                                                                                                                                                                                                                                                                                                                                                                                                                               |
| EPI_ISL_1248877, EPI_ISL_1248902, EPI_ISL_1248903, EPI_ISL_1248904, EPI_ISL_1248905, EPI_ISL_1248906, EPI_ISL_1248907, EPI_ISL_1248908, EPI_ISL_1248909, EPI_ISL_1248910, EPI_ISL_1248911, EPI_ISL_1248912, EPI_ISL_1248913, EPI_ISL_1248914                                                                                                                                                                                                                                                                                                                   | see above                                                                                                                                                                        | Northumbria University / South Tees Hospitals NHS Foundation Trust / North Cumbria Integrated Care NHS Foundation Trust / North Tees and Hartlepool NHS Foundation Trust / Newcastle Hospitals NHS Foundation Trust | Darren L Smith, Andrew Nelson, Matthew Bashton, Greg R Young, Joshua Loh, John Allan, Mohammad A Tariq, Giles S Holt, Gary Black, Wen C Yew, Lynn Dover, Paul Baker, Steve Liggett, Sarah Essex, Jane Greenaway, Debra Padgett, Clive Graham, Garren Scott, Edward Barton, Emma Swindells, Brendan Payne, Jennifer Collins, Yusri Taha, Gary Eltringham                                                                                                                                                                                                                                                                                                                                                    |
| EPI_ISL_1248963, EPI_ISL_1248978, EPI_ISL_1248980, EPI_ISL_1248983, EPI_ISL_1248985, EPI_ISL_1248986, EPI_ISL_1248989, EPI_ISL_1248991, EPI_ISL_1248992, EPI_ISL_1248995, EPI_ISL_1249000, EPI_ISL_1249005, EPI_ISL_1249009, EPI_ISL_1249010, EPI_ISL_1249015, EPI_ISL_1249016, EPI_ISL_1249017, EPI_ISL_1249021, EPI_ISL_1249022, EPI_ISL_1249023, EPI_ISL_1249030, EPI_ISL_1249031, EPI_ISL_1249033, EPI_ISL_1249037, EPI_ISL_1249041, EPI_ISL_1249044, EPI_ISL_1249045, EPI_ISL_1249047, EPI_ISL_1249048, EPI_ISL_1249051, EPI_ISL_1249052, EPI_ISL_1249053 | see above                                                                                                                                                                        | Quadram Institute Bioscience                                                                                                                                                                                        | Dave J. Baker, Gemma L. Kay, Alp Aydin, Thanh Le-Viet, Steven Rudder, Ana P. Tedim, Anastasia Kolyva, Maria Diaz, Leonardo de Oliveira Martins, Nabil-Fareed Aikhan, Lizzie Meadows, Rachael Stanley, Ngozi Elumogo, Muhammed Yasir, Nicholas M. Thomson, Alexander J Trotter, Rachel Gilroy, Samuel Bloomfield, Claire Stuart, Andrew Bell, Reenesh Prakash, Samir Dervisevic, Alison E. Mather, John Wain, Mark Webber, Andrew J. Page, Justin O'Grady                                                                                                                                                                                                                                                   |
| EPI_ISL_1265369                                                                                                                                                                                                                                                                                                                                                                                                                                                                                                                                                | Barts Health NHS Trust                                                                                                                                                           | Barts Health NHS Trust                                                                                                                                                                                              | KARAA, Esin; CUTINO-MOGUEL, Maria-Teresa; HARRINGTON, David; OWOYEMI, Dola; KULASEGARAN-SHYLINI, Raghavendran; BROAD, Claire; KELE, Beatrix                                                                                                                                                                                                                                                                                                                                                                                                                                                                                                                                                                |
| EPI_ISL_1296563, EPI_ISL_1296565, EPI_ISL_1296566, EPI_ISL_1296567, EPI_ISL_1296568, EPI_ISL_1296569, EPI_ISL_1296570, EPI_ISL_1296572, EPI_ISL_1296573, EPI_ISL_1296574, EPI_ISL_1296575, EPI_ISL_1296576, EPI_ISL_1296577, EPI_ISL_1296579, EPI_ISL_1296580, EPI_ISL_1296583, EPI_ISL_1296584, EPI_ISL_1296599                                                                                                                                                                                                                                               | see above                                                                                                                                                                        | Respiratory Virus Unit, National Infection Service, Public Health England                                                                                                                                           | PHE Covid Sequencing Team                                                                                                                                                                                                                                                                                                                                                                                                                                                                                                                                                                                                                                                                                  |
| EPI_ISL_1308536, EPI_ISL_1308548, EPI_ISL_1308549, EPI_ISL_1308550, EPI_ISL_1308551, EPI_ISL_1308552, EPI_ISL_1308553, EPI_ISL_1308554, EPI_ISL_1308555, EPI_ISL_1308556, EPI_ISL_1308566, EPI_ISL_1308569, EPI_ISL_1308572, EPI_ISL_1308573, EPI_ISL_1308574, EPI_ISL_1308575, EPI_ISL_1308576, EPI_ISL_1308577, EPI_ISL_1308579, EPI_ISL_1308580, EPI_ISL_1308582                                                                                                                                                                                            | see above                                                                                                                                                                        | University of Exeter                                                                                                                                                                                                | Ben Temperton, Aaron Jeffries, Michelle Michelsen, Joanna Warwick-Dugdale, Audrey Farbos, Robyn Manley, Stephen Michell, Jane Masoli                                                                                                                                                                                                                                                                                                                                                                                                                                                                                                                                                                       |
| EPI_ISL_1308821, EPI_ISL_1308853                                                                                                                                                                                                                                                                                                                                                                                                                                                                                                                               | Virology Department, Royal Infirmary of Edinburgh, NHS Lothian / School of Biological Sciences, University of Edinburgh                                                          | COVID-19 Genomics UK (COG-UK) Consortium                                                                                                                                                                            | McHugh M, Dewar R, Cotton S, Rooke S, O'Toole Á, Scher E, Hill V, McCrone JT, Colquhoun R, Yu X, Jackson B, Rambaut A, Templeton K                                                                                                                                                                                                                                                                                                                                                                                                                                                                                                                                                                         |
| EPI_ISL_1309026, EPI_ISL_1309027, EPI_ISL_1309052, EPI_ISL_1309076, EPI_ISL_1309101                                                                                                                                                                                                                                                                                                                                                                                                                                                                            | University College London, Great Ormond Street Hospital for Children NHS Foundation Trust, Imperial College Healthcare NHS Trust                                                 | COVID-19 Genomics UK (COG-UK) Consortium                                                                                                                                                                            | Sergi Castellano, Rachel Williams, Mark Kristiansen, Paola Resende Silva, Sunando Roy, Tony Brooks, Helena Tutill, Paola Niola, Patricia Dyal, Charlotte Williams, Leysa Forrest, Yasmin Panchbhaya, Jacqueline Findlay, Samuel Weeks, Julianne Brown, Kathryn Harris, Paul Randell, James Price, Alison Holmes, Judith Breuer                                                                                                                                                                                                                                                                                                                                                                             |
| EPI_ISL_1309667                                                                                                                                                                                                                                                                                                                                                                                                                                                                                                                                                | Quadram Institute Bioscience                                                                                                                                                     | COVID-19 Genomics UK (COG-UK) Consortium                                                                                                                                                                            | Dave J. Baker, Gemma L. Kay, Alp Aydin, Thanh Le-Viet, Steven Rudder, Ana P. Tedim, Anastasia Kolyva, Maria Diaz, Leonardo de Oliveira Martins, Nabil-Fareed Aikhan, Lizzie Meadows, Rachael Stanley, Ngozi Elumogo, Muhammed Yasir, Nicholas M. Thomson, Alexander J Trotter, Rachel Gilroy, Samuel Bloomfield, Claire Stuart, Andrew Bell, Reenesh Prakash, Samir Dervisevic, Alison E. Mather, John Wain, Mark Webber, Andrew J. Page, Justin O'Grady                                                                                                                                                                                                                                                   |
| EPI_ISL_1309743, EPI_ISL_1309744, EPI_ISL_1309754, EPI_ISL_1309755                                                                                                                                                                                                                                                                                                                                                                                                                                                                                             | Oxford Viromics, NDM, University of Oxford; Oxford University Hospitals; Basingstoke and North Hampshire Hospital                                                                | COVID-19 Genomics UK (COG-UK) Consortium                                                                                                                                                                            | Tanya Golubchik, David Bonsall, George Macintyre, Amy Trebes, Mariateresa de Cesare, Catrin Moore, Alex Mobbs, Anita Justice, Robert Shaw, Monique Andersson, Timothy Peto, Emma Wise, Nathan Moore, Jessica Lynch, Nick Cortes, Matilde Mori, Stephen Kidd, David Buck, John Todd, Christophe Fraser                                                                                                                                                                                                                                                                                                                                                                                                      |
| EPI_ISL_1365323                                                                                                                                                                                                                                                                                                                                                                                                                                                                                                                                                | Lighthouse Lab in Glasgow                                                                                                                                                        | Wellcome Sanger Institute for the COVID-19 Genomics UK (COG-UK) Consortium                                                                                                                                          | Harper VanSteenhouse, Yumi Kasai, David Gray, Carol Clugston, Anna Dominiczak and Alex Alderton, Roberto Amato, Jeffrey Barrett, Sonia Goncalves, Ewan Harrison, David K. Jackson, Ian Johnston, Dominic Kwiatkowski, Cordelia Langford, John Sillitoe on behalf of the Wellcome Sanger Institute COVID-19 Surveillance Team                                                                                                                                                                                                                                                                                                                                                                               |
| EPI_ISL_1386509                                                                                                                                                                                                                                                                                                                                                                                                                                                                                                                                                | University of Birmingham                                                                                                                                                         | COVID-19 Genomics UK (COG-UK) Consortium                                                                                                                                                                            | Institute of Microbiology, University of Birmingham: Claire McMurray, Joanne Stockton, Samuel Nicholls, Radoslaw Poplawski, Will Rowe, Josh Quick, Nicholas Loman, University of Birmingham Testing Laboratory: Celina M Whalley, Andrew Bosworth, Charlotte Poxon, Kasun Wanigasooriya, Oliver Pickles, Mike Kidd, Alex Richter, Andrew D Beggs PHE Heartlands Lab: Husam Osman, Andrew Bosworth. Queen Elizabeth Hospital: Anna Casey                                                                                                                                                                                                                                                                    |
| EPI_ISL_1387221                                                                                                                                                                                                                                                                                                                                                                                                                                                                                                                                                | Oxford Viromics, NDM, University of Oxford; Oxford University Hospitals; Basingstoke and North Hampshire Hospital                                                                | COVID-19 Genomics UK (COG-UK) Consortium                                                                                                                                                                            | Tanya Golubchik, David Bonsall, George Macintyre, Amy Trebes, Mariateresa de Cesare, Catrin Moore, Alex Mobbs, Anita Justice, Robert Shaw, Monique Andersson, Timothy Peto, Emma Wise, Nathan Moore, Jessica Lynch, Nick Cortes, Matilde Mori, Stephen Kidd, David Buck, John Todd, Christophe Fraser                                                                                                                                                                                                                                                                                                                                                                                                      |
| EPI_ISL_1391411, EPI_ISL_1391412                                                                                                                                                                                                                                                                                                                                                                                                                                                                                                                               | Barts Health NHS Trust                                                                                                                                                           | Barts Health NHS Trust                                                                                                                                                                                              | KARAA, Esin; CUTINO-MOGUEL, Maria-Teresa; HARRINGTON, David; OWOYEMI, Dola; KULASEGARAN-SHYLINI, Raghavendran; BROAD, Claire;                                                                                                                                                                                                                                                                                                                                                                                                                                                                                                                                                                              |

|                                                                                                                                                                                                                                                                                                                                                                                                                                                                                                                                                                                                                                                                                                                                                                                                                                                                                                                                                                                                                                                                                                                                                                                                                                                                                                                                                                                                                                                                                                                                                                                                                                                                                                                                                                                                                                                                                                                                                                                                                                                                                                                                                                                                                                                                                                                                                                                                                                                                                                                                                                                                                                                                                                                                                                                                                                |                                                                                                                                                                                  |                                                                            |                                                                                                                                                                                                                                                                                                                                                                          |
|--------------------------------------------------------------------------------------------------------------------------------------------------------------------------------------------------------------------------------------------------------------------------------------------------------------------------------------------------------------------------------------------------------------------------------------------------------------------------------------------------------------------------------------------------------------------------------------------------------------------------------------------------------------------------------------------------------------------------------------------------------------------------------------------------------------------------------------------------------------------------------------------------------------------------------------------------------------------------------------------------------------------------------------------------------------------------------------------------------------------------------------------------------------------------------------------------------------------------------------------------------------------------------------------------------------------------------------------------------------------------------------------------------------------------------------------------------------------------------------------------------------------------------------------------------------------------------------------------------------------------------------------------------------------------------------------------------------------------------------------------------------------------------------------------------------------------------------------------------------------------------------------------------------------------------------------------------------------------------------------------------------------------------------------------------------------------------------------------------------------------------------------------------------------------------------------------------------------------------------------------------------------------------------------------------------------------------------------------------------------------------------------------------------------------------------------------------------------------------------------------------------------------------------------------------------------------------------------------------------------------------------------------------------------------------------------------------------------------------------------------------------------------------------------------------------------------------|----------------------------------------------------------------------------------------------------------------------------------------------------------------------------------|----------------------------------------------------------------------------|--------------------------------------------------------------------------------------------------------------------------------------------------------------------------------------------------------------------------------------------------------------------------------------------------------------------------------------------------------------------------|
| EPI_ISL_1474859                                                                                                                                                                                                                                                                                                                                                                                                                                                                                                                                                                                                                                                                                                                                                                                                                                                                                                                                                                                                                                                                                                                                                                                                                                                                                                                                                                                                                                                                                                                                                                                                                                                                                                                                                                                                                                                                                                                                                                                                                                                                                                                                                                                                                                                                                                                                                                                                                                                                                                                                                                                                                                                                                                                                                                                                                | University College London, Great Ormond Street Hospital for Children NHS Foundation Trust, Imperial College Healthcare NHS Trust                                                 | COVID-19 Genomics UK (COG-UK) Consortium                                   | KELE, Beatrix<br>Sergi Castellano, Rachel Williams, Mark Kristiansen, Paola Resende Silva, Sunando Roy, Tony Brooks, Helena Tutill, Paola Niola, Patricia Dyal, Charlotte Williams, Leysa Forrest, Yasmin Panchbhaya, Jacqueline Findlay, Samuel Weeks, Julianne Brown, Kathryn Harris, Paul Randell, James Price, Alison Holmes, Judith Breuer                          |
| EPI_ISL_1475031, EPI_ISL_1475032, EPI_ISL_1475033, EPI_ISL_1475035, EPI_ISL_1475048, EPI_ISL_1475051, EPI_ISL_1475052, EPI_ISL_1475054, EPI_ISL_1475055, EPI_ISL_1475056, EPI_ISL_1475084, EPI_ISL_1475086, EPI_ISL_1475087, EPI_ISL_1475088, EPI_ISL_1475090, EPI_ISL_1475122, EPI_ISL_1475123, EPI_ISL_1475128, EPI_ISL_1475129, EPI_ISL_1475130                                                                                                                                                                                                                                                                                                                                                                                                                                                                                                                                                                                                                                                                                                                                                                                                                                                                                                                                                                                                                                                                                                                                                                                                                                                                                                                                                                                                                                                                                                                                                                                                                                                                                                                                                                                                                                                                                                                                                                                                                                                                                                                                                                                                                                                                                                                                                                                                                                                                             |                                                                                                                                                                                  |                                                                            |                                                                                                                                                                                                                                                                                                                                                                          |
| see above                                                                                                                                                                                                                                                                                                                                                                                                                                                                                                                                                                                                                                                                                                                                                                                                                                                                                                                                                                                                                                                                                                                                                                                                                                                                                                                                                                                                                                                                                                                                                                                                                                                                                                                                                                                                                                                                                                                                                                                                                                                                                                                                                                                                                                                                                                                                                                                                                                                                                                                                                                                                                                                                                                                                                                                                                      | Regional Virus Laboratory, Belfast Health and Social Care Trust                                                                                                                  | COVID-19 Genomics UK (COG-UK) Consortium                                   | Conall McCaughey, James McKenna, Tanya Curran, Susan Feeney, Alison Watt, Ciara Cox, Mairead Connor, Zoltan Molnar, David Simpson, Derek Fairley                                                                                                                                                                                                                         |
| EPI_ISL_1476451, EPI_ISL_1476452, EPI_ISL_1476453, EPI_ISL_1476454, EPI_ISL_1476456, EPI_ISL_1476457, EPI_ISL_1476458, EPI_ISL_1476460, EPI_ISL_1476464, EPI_ISL_1476467, EPI_ISL_1476471, EPI_ISL_1476472, EPI_ISL_1476474, EPI_ISL_1476476, EPI_ISL_1476477, EPI_ISL_1476504, EPI_ISL_1476514                                                                                                                                                                                                                                                                                                                                                                                                                                                                                                                                                                                                                                                                                                                                                                                                                                                                                                                                                                                                                                                                                                                                                                                                                                                                                                                                                                                                                                                                                                                                                                                                                                                                                                                                                                                                                                                                                                                                                                                                                                                                                                                                                                                                                                                                                                                                                                                                                                                                                                                                |                                                                                                                                                                                  |                                                                            |                                                                                                                                                                                                                                                                                                                                                                          |
| see above                                                                                                                                                                                                                                                                                                                                                                                                                                                                                                                                                                                                                                                                                                                                                                                                                                                                                                                                                                                                                                                                                                                                                                                                                                                                                                                                                                                                                                                                                                                                                                                                                                                                                                                                                                                                                                                                                                                                                                                                                                                                                                                                                                                                                                                                                                                                                                                                                                                                                                                                                                                                                                                                                                                                                                                                                      | Originating lab: Wales Specialist Virology Centre Sequencing lab: Pathogen Genomics Unit                                                                                         | Public Health Wales Microbiology Cardiff Wales Specialist Virology Centre  | Catherine Moore, Johnathan Evans, Laura Gifford, Malorie Perry, Simon Cottrell, Angela Marchbank, Alec Birchley, Alexander Adams, Amy Gaskin, Bree Gatica-Wilcox, Jason Coombes, Joel Southgate, Lauren Gilbert, Lee Graham, Nicole Pacchiarini, Sara Kumziene-Summerhayes, Sarah Taylor, Sophie Jones, Sara Rey, Matthew Bull, Joanne Watkins, Sally Corden, Tom Connor |
| EPI_ISL_868359, EPI_ISL_868360, EPI_ISL_868377, EPI_ISL_868403, EPI_ISL_868449, EPI_ISL_868511, EPI_ISL_868534, EPI_ISL_868540, EPI_ISL_868549, EPI_ISL_868567, EPI_ISL_868606, EPI_ISL_868653, EPI_ISL_868671, EPI_ISL_868702                                                                                                                                                                                                                                                                                                                                                                                                                                                                                                                                                                                                                                                                                                                                                                                                                                                                                                                                                                                                                                                                                                                                                                                                                                                                                                                                                                                                                                                                                                                                                                                                                                                                                                                                                                                                                                                                                                                                                                                                                                                                                                                                                                                                                                                                                                                                                                                                                                                                                                                                                                                                 |                                                                                                                                                                                  |                                                                            |                                                                                                                                                                                                                                                                                                                                                                          |
| see above                                                                                                                                                                                                                                                                                                                                                                                                                                                                                                                                                                                                                                                                                                                                                                                                                                                                                                                                                                                                                                                                                                                                                                                                                                                                                                                                                                                                                                                                                                                                                                                                                                                                                                                                                                                                                                                                                                                                                                                                                                                                                                                                                                                                                                                                                                                                                                                                                                                                                                                                                                                                                                                                                                                                                                                                                      | Virology Department, Sheffield Teaching Hospitals NHS Foundation Trust/Department of Infection, Immunity and Cardiovascular Disease, The Medical School, University of Sheffield | COVID-19 Genomics UK (COG-UK) Consortium                                   | Thushan de Silva, Matthew Parker, Nikki Smith, Adri Anyal, Rebecca Brown, Luke Green, Rachel Tucker, Paul Parsons, Danielle Groves, Katie Johnson, Laura Carrilero, Alex Keeley, Dave Partridge, Matthew Wyles, Benjamin Lindsey, Mehmet Yavuz, Mohammad Raza, Cariad Evans                                                                                              |
| EPI_ISL_882611                                                                                                                                                                                                                                                                                                                                                                                                                                                                                                                                                                                                                                                                                                                                                                                                                                                                                                                                                                                                                                                                                                                                                                                                                                                                                                                                                                                                                                                                                                                                                                                                                                                                                                                                                                                                                                                                                                                                                                                                                                                                                                                                                                                                                                                                                                                                                                                                                                                                                                                                                                                                                                                                                                                                                                                                                 | Lighthouse Lab in Milton Keynes                                                                                                                                                  | Wellcome Sanger Institute for the COVID-19 Genomics UK (COG-UK) Consortium | The Lighthouse Lab in Milton Keynes and Alex Alderton, Roberto Amato, Sonia Goncalves, Ewan Harrison, David K. Jackson, Ian Johnston, Dominic Kwiatkowski, Cordelia Langford, John Sillitoe on behalf of the Wellcome Sanger Institute COVID-19 Surveillance Team                                                                                                        |
| EPI_ISL_907120, EPI_ISL_907121, EPI_ISL_907122, EPI_ISL_907123, EPI_ISL_907124, EPI_ISL_907125, EPI_ISL_907126, EPI_ISL_907127, EPI_ISL_907128, EPI_ISL_907129, EPI_ISL_907130, EPI_ISL_907131, EPI_ISL_907132, EPI_ISL_907134, EPI_ISL_907135, EPI_ISL_907137, EPI_ISL_907138, EPI_ISL_907140, EPI_ISL_907141, EPI_ISL_907142, EPI_ISL_907143, EPI_ISL_907145, EPI_ISL_907146, EPI_ISL_907149, EPI_ISL_907150, EPI_ISL_907151, EPI_ISL_907153, EPI_ISL_907154, EPI_ISL_907156, EPI_ISL_907157, EPI_ISL_907158, EPI_ISL_907159, EPI_ISL_907161, EPI_ISL_907162, EPI_ISL_907165, EPI_ISL_907166, EPI_ISL_907169, EPI_ISL_907170, EPI_ISL_907171, EPI_ISL_907172, EPI_ISL_907174, EPI_ISL_907175, EPI_ISL_907176, EPI_ISL_907177, EPI_ISL_907178, EPI_ISL_907180, EPI_ISL_907181, EPI_ISL_907183, EPI_ISL_907184, EPI_ISL_907185, EPI_ISL_907188, EPI_ISL_907189, EPI_ISL_907191, EPI_ISL_907196, EPI_ISL_907197, EPI_ISL_907198, EPI_ISL_907199, EPI_ISL_907201, EPI_ISL_907202, EPI_ISL_907203, EPI_ISL_907204, EPI_ISL_907205, EPI_ISL_907207, EPI_ISL_907208, EPI_ISL_907211, EPI_ISL_907213, EPI_ISL_907215, EPI_ISL_907216, EPI_ISL_907217, EPI_ISL_907218, EPI_ISL_907226, EPI_ISL_907227, EPI_ISL_907228, EPI_ISL_907229, EPI_ISL_907230, EPI_ISL_907231, EPI_ISL_907232, EPI_ISL_907233, EPI_ISL_907234, EPI_ISL_907235, EPI_ISL_907236, EPI_ISL_907239, EPI_ISL_907240, EPI_ISL_907242, EPI_ISL_907243, EPI_ISL_907244, EPI_ISL_907245, EPI_ISL_907246, EPI_ISL_907247, EPI_ISL_907248, EPI_ISL_907249, EPI_ISL_907251, EPI_ISL_907252, EPI_ISL_907253, EPI_ISL_907255, EPI_ISL_907257, EPI_ISL_907258, EPI_ISL_907259, EPI_ISL_907261, EPI_ISL_907262, EPI_ISL_907265, EPI_ISL_907266, EPI_ISL_907270, EPI_ISL_907271, EPI_ISL_907272, EPI_ISL_907274, EPI_ISL_907275, EPI_ISL_907276, EPI_ISL_907277, EPI_ISL_907278, EPI_ISL_907280, EPI_ISL_907282, EPI_ISL_907283, EPI_ISL_907285, EPI_ISL_907286, EPI_ISL_907289, EPI_ISL_907290, EPI_ISL_907291, EPI_ISL_907293, EPI_ISL_907294, EPI_ISL_907295, EPI_ISL_907296, EPI_ISL_907297, EPI_ISL_907298, EPI_ISL_907299, EPI_ISL_907301, EPI_ISL_907302, EPI_ISL_907305, EPI_ISL_907306, EPI_ISL_907307, EPI_ISL_907309, EPI_ISL_907310, EPI_ISL_907311, EPI_ISL_907312, EPI_ISL_907313, EPI_ISL_907314, EPI_ISL_907316, EPI_ISL_907317, EPI_ISL_907319, EPI_ISL_907320, EPI_ISL_907321, EPI_ISL_907326, EPI_ISL_907327, EPI_ISL_907329, EPI_ISL_907330, EPI_ISL_907331, EPI_ISL_907332, EPI_ISL_907333, EPI_ISL_907334, EPI_ISL_907335, EPI_ISL_907337, EPI_ISL_907338, EPI_ISL_907339, EPI_ISL_907340, EPI_ISL_907342, EPI_ISL_907343, EPI_ISL_907344, EPI_ISL_907345, EPI_ISL_907346, EPI_ISL_907349, EPI_ISL_907354, EPI_ISL_907356, EPI_ISL_907357, EPI_ISL_907358, EPI_ISL_907360, EPI_ISL_907361, EPI_ISL_907365, EPI_ISL_907366, EPI_ISL_907368, EPI_ISL_907370 |                                                                                                                                                                                  |                                                                            |                                                                                                                                                                                                                                                                                                                                                                          |
| see above                                                                                                                                                                                                                                                                                                                                                                                                                                                                                                                                                                                                                                                                                                                                                                                                                                                                                                                                                                                                                                                                                                                                                                                                                                                                                                                                                                                                                                                                                                                                                                                                                                                                                                                                                                                                                                                                                                                                                                                                                                                                                                                                                                                                                                                                                                                                                                                                                                                                                                                                                                                                                                                                                                                                                                                                                      | Lighthouse Lab in Glasgow                                                                                                                                                        | Wellcome Sanger Institute for the COVID-19 Genomics UK (COG-UK) Consortium | Harper VanSteenhouse, Yumi Kasai, David Gray, Carol Clugston, Anna Dominiczak and Alex Alderton, Roberto Amato, Sonia Goncalves, Ewan Harrison, David K. Jackson, Ian Johnston, Dominic Kwiatkowski, Cordelia Langford, John Sillitoe on behalf of the Wellcome Sanger Institute COVID-19 Surveillance Team                                                              |
| EPI_ISL_907371, EPI_ISL_907372, EPI_ISL_907373, EPI_ISL_907374, EPI_ISL_907376, EPI_ISL_907377                                                                                                                                                                                                                                                                                                                                                                                                                                                                                                                                                                                                                                                                                                                                                                                                                                                                                                                                                                                                                                                                                                                                                                                                                                                                                                                                                                                                                                                                                                                                                                                                                                                                                                                                                                                                                                                                                                                                                                                                                                                                                                                                                                                                                                                                                                                                                                                                                                                                                                                                                                                                                                                                                                                                 | Lighthouse Lab in Alderley Park                                                                                                                                                  | Wellcome Sanger Institute for the COVID-19 Genomics UK (COG-UK) Consortium | Jacquelyn Wynn, Mairead Hyland, The Lighthouse Lab in Alderley Park and Alex Alderton, Roberto Amato, Sonia Goncalves, Ewan Harrison, David K. Jackson, Ian Johnston, Dominic Kwiatkowski, Cordelia Langford, John Sillitoe on behalf of the Wellcome Sanger Institute COVID-19 Surveillance Team                                                                        |
| EPI_ISL_907378, EPI_ISL_907379, EPI_ISL_907381                                                                                                                                                                                                                                                                                                                                                                                                                                                                                                                                                                                                                                                                                                                                                                                                                                                                                                                                                                                                                                                                                                                                                                                                                                                                                                                                                                                                                                                                                                                                                                                                                                                                                                                                                                                                                                                                                                                                                                                                                                                                                                                                                                                                                                                                                                                                                                                                                                                                                                                                                                                                                                                                                                                                                                                 | Lighthouse Lab in Glasgow                                                                                                                                                        | Wellcome Sanger Institute for the COVID-19 Genomics UK (COG-UK) Consortium | Harper VanSteenhouse, Yumi Kasai, David Gray, Carol Clugston, Anna Dominiczak and Alex Alderton, Roberto Amato, Sonia Goncalves, Ewan Harrison, David K. Jackson, Ian Johnston, Dominic Kwiatkowski, Cordelia Langford, John Sillitoe on behalf of the Wellcome Sanger Institute COVID-19 Surveillance Team                                                              |
| EPI_ISL_907382, EPI_ISL_907383                                                                                                                                                                                                                                                                                                                                                                                                                                                                                                                                                                                                                                                                                                                                                                                                                                                                                                                                                                                                                                                                                                                                                                                                                                                                                                                                                                                                                                                                                                                                                                                                                                                                                                                                                                                                                                                                                                                                                                                                                                                                                                                                                                                                                                                                                                                                                                                                                                                                                                                                                                                                                                                                                                                                                                                                 | Lighthouse Lab in Alderley Park                                                                                                                                                  | Wellcome Sanger Institute for the COVID-19 Genomics UK (COG-UK) Consortium | Jacquelyn Wynn, Mairead Hyland, The Lighthouse Lab in Alderley Park and Alex Alderton, Roberto Amato, Sonia Goncalves, Ewan Harrison, David K. Jackson, Ian Johnston, Dominic Kwiatkowski, Cordelia Langford, John Sillitoe on behalf of the Wellcome Sanger Institute COVID-19 Surveillance Team                                                                        |
| EPI_ISL_907384, EPI_ISL_907385, EPI_ISL_907386                                                                                                                                                                                                                                                                                                                                                                                                                                                                                                                                                                                                                                                                                                                                                                                                                                                                                                                                                                                                                                                                                                                                                                                                                                                                                                                                                                                                                                                                                                                                                                                                                                                                                                                                                                                                                                                                                                                                                                                                                                                                                                                                                                                                                                                                                                                                                                                                                                                                                                                                                                                                                                                                                                                                                                                 | Lighthouse Lab in Glasgow                                                                                                                                                        | Wellcome Sanger Institute for the COVID-19 Genomics UK (COG-UK) Consortium | Harper VanSteenhouse, Yumi Kasai, David Gray, Carol Clugston, Anna Dominiczak and Alex Alderton, Roberto Amato, Sonia Goncalves, Ewan Harrison, David K. Jackson, Ian Johnston, Dominic Kwiatkowski, Cordelia Langford, John Sillitoe on behalf of the Wellcome Sanger Institute COVID-19 Surveillance Team                                                              |
| EPI_ISL_907389                                                                                                                                                                                                                                                                                                                                                                                                                                                                                                                                                                                                                                                                                                                                                                                                                                                                                                                                                                                                                                                                                                                                                                                                                                                                                                                                                                                                                                                                                                                                                                                                                                                                                                                                                                                                                                                                                                                                                                                                                                                                                                                                                                                                                                                                                                                                                                                                                                                                                                                                                                                                                                                                                                                                                                                                                 | Lighthouse Lab in Alderley Park                                                                                                                                                  | Wellcome Sanger Institute for the COVID-19 Genomics UK (COG-UK) Consortium | Jacquelyn Wynn, Mairead Hyland, The Lighthouse Lab in Alderley Park and Alex Alderton, Roberto Amato, Sonia Goncalves, Ewan Harrison, David K. Jackson, Ian Johnston, Dominic Kwiatkowski, Cordelia Langford, John Sillitoe on behalf of the Wellcome Sanger Institute COVID-19 Surveillance Team                                                                        |
| EPI_ISL_907393, EPI_ISL_907394, EPI_ISL_907395                                                                                                                                                                                                                                                                                                                                                                                                                                                                                                                                                                                                                                                                                                                                                                                                                                                                                                                                                                                                                                                                                                                                                                                                                                                                                                                                                                                                                                                                                                                                                                                                                                                                                                                                                                                                                                                                                                                                                                                                                                                                                                                                                                                                                                                                                                                                                                                                                                                                                                                                                                                                                                                                                                                                                                                 | Lighthouse Lab in Glasgow                                                                                                                                                        | Wellcome Sanger Institute for the COVID-19 Genomics UK (COG-UK) Consortium | Harper VanSteenhouse, Yumi Kasai, David Gray, Carol Clugston, Anna Dominiczak and Alex Alderton, Roberto Amato, Sonia Goncalves, Ewan Harrison, David K. Jackson, Ian Johnston, Dominic Kwiatkowski, Cordelia Langford, John Sillitoe on behalf of the Wellcome Sanger Institute COVID-19 Surveillance Team                                                              |
| EPI_ISL_907396                                                                                                                                                                                                                                                                                                                                                                                                                                                                                                                                                                                                                                                                                                                                                                                                                                                                                                                                                                                                                                                                                                                                                                                                                                                                                                                                                                                                                                                                                                                                                                                                                                                                                                                                                                                                                                                                                                                                                                                                                                                                                                                                                                                                                                                                                                                                                                                                                                                                                                                                                                                                                                                                                                                                                                                                                 | Lighthouse Lab in Alderley Park                                                                                                                                                  | Wellcome Sanger Institute for the COVID-19 Genomics UK (COG-UK) Consortium | Jacquelyn Wynn, Mairead Hyland, The Lighthouse Lab in Alderley Park and Alex Alderton, Roberto Amato, Sonia Goncalves, Ewan Harrison, David K. Jackson, Ian Johnston, Dominic Kwiatkowski, Cordelia Langford, John Sillitoe on behalf of the Wellcome Sanger Institute COVID-19 Surveillance Team                                                                        |
| EPI_ISL_907397, EPI_ISL_907398, EPI_ISL_907401, EPI_ISL_907402                                                                                                                                                                                                                                                                                                                                                                                                                                                                                                                                                                                                                                                                                                                                                                                                                                                                                                                                                                                                                                                                                                                                                                                                                                                                                                                                                                                                                                                                                                                                                                                                                                                                                                                                                                                                                                                                                                                                                                                                                                                                                                                                                                                                                                                                                                                                                                                                                                                                                                                                                                                                                                                                                                                                                                 | Lighthouse Lab in Glasgow                                                                                                                                                        | Wellcome Sanger Institute for the COVID-19 Genomics UK (COG-UK) Consortium | Harper VanSteenhouse, Yumi Kasai, David Gray, Carol Clugston, Anna Dominiczak and Alex Alderton, Roberto Amato, Sonia Goncalves, Ewan Harrison, David K. Jackson, Ian Johnston, Dominic Kwiatkowski, Cordelia Langford, John Sillitoe on behalf of the Wellcome Sanger Institute COVID-19 Surveillance Team                                                              |
| EPI_ISL_907403, EPI_ISL_907404                                                                                                                                                                                                                                                                                                                                                                                                                                                                                                                                                                                                                                                                                                                                                                                                                                                                                                                                                                                                                                                                                                                                                                                                                                                                                                                                                                                                                                                                                                                                                                                                                                                                                                                                                                                                                                                                                                                                                                                                                                                                                                                                                                                                                                                                                                                                                                                                                                                                                                                                                                                                                                                                                                                                                                                                 | Lighthouse Lab in Alderley Park                                                                                                                                                  | Wellcome Sanger Institute for the COVID-19 Genomics UK (COG-UK) Consortium | Jacquelyn Wynn, Mairead Hyland, The Lighthouse Lab in Alderley Park and Alex Alderton, Roberto Amato, Sonia Goncalves, Ewan Harrison, David K. Jackson, Ian Johnston, Dominic Kwiatkowski, Cordelia Langford, John Sillitoe on behalf of the Wellcome Sanger Institute COVID-19 Surveillance Team                                                                        |
| EPI_ISL_907405                                                                                                                                                                                                                                                                                                                                                                                                                                                                                                                                                                                                                                                                                                                                                                                                                                                                                                                                                                                                                                                                                                                                                                                                                                                                                                                                                                                                                                                                                                                                                                                                                                                                                                                                                                                                                                                                                                                                                                                                                                                                                                                                                                                                                                                                                                                                                                                                                                                                                                                                                                                                                                                                                                                                                                                                                 | Lighthouse Lab in Glasgow                                                                                                                                                        | Wellcome Sanger Institute for the COVID-19 Genomics UK (COG-UK) Consortium | Harper VanSteenhouse, Yumi Kasai, David Gray, Carol Clugston, Anna Dominiczak and Alex Alderton, Roberto Amato, Sonia Goncalves, Ewan Harrison, David K. Jackson, Ian Johnston, Dominic Kwiatkowski, Cordelia Langford, John Sillitoe on behalf of the Wellcome Sanger Institute COVID-19 Surveillance Team                                                              |
| EPI_ISL_907406, EPI_ISL_907407                                                                                                                                                                                                                                                                                                                                                                                                                                                                                                                                                                                                                                                                                                                                                                                                                                                                                                                                                                                                                                                                                                                                                                                                                                                                                                                                                                                                                                                                                                                                                                                                                                                                                                                                                                                                                                                                                                                                                                                                                                                                                                                                                                                                                                                                                                                                                                                                                                                                                                                                                                                                                                                                                                                                                                                                 | Lighthouse Lab in Alderley Park                                                                                                                                                  | Wellcome Sanger Institute for the COVID-19 Genomics UK (COG-UK) Consortium | Jacquelyn Wynn, Mairead Hyland, The Lighthouse Lab in Alderley Park and Alex Alderton, Roberto Amato, Sonia Goncalves, Ewan Harrison, David K. Jackson, Ian Johnston, Dominic Kwiatkowski, Cordelia Langford, John Sillitoe on behalf of the Wellcome Sanger Institute COVID-19 Surveillance Team                                                                        |
| EPI_ISL_907408                                                                                                                                                                                                                                                                                                                                                                                                                                                                                                                                                                                                                                                                                                                                                                                                                                                                                                                                                                                                                                                                                                                                                                                                                                                                                                                                                                                                                                                                                                                                                                                                                                                                                                                                                                                                                                                                                                                                                                                                                                                                                                                                                                                                                                                                                                                                                                                                                                                                                                                                                                                                                                                                                                                                                                                                                 | Lighthouse Lab in Glasgow                                                                                                                                                        | Wellcome Sanger Institute for the COVID-19 Genomics UK (COG-UK) Consortium | Harper VanSteenhouse, Yumi Kasai, David Gray, Carol Clugston, Anna Dominiczak and Alex Alderton, Roberto Amato, Sonia Goncalves, Ewan Harrison, David K. Jackson, Ian Johnston, Dominic Kwiatkowski, Cordelia Langford, John Sillitoe on behalf of the Wellcome Sanger Institute COVID-19 Surveillance Team                                                              |
| EPI_ISL_907409, EPI_ISL_907410, EPI_ISL_907411, EPI_ISL_907412, EPI_ISL_907413                                                                                                                                                                                                                                                                                                                                                                                                                                                                                                                                                                                                                                                                                                                                                                                                                                                                                                                                                                                                                                                                                                                                                                                                                                                                                                                                                                                                                                                                                                                                                                                                                                                                                                                                                                                                                                                                                                                                                                                                                                                                                                                                                                                                                                                                                                                                                                                                                                                                                                                                                                                                                                                                                                                                                 | Lighthouse Lab in Alderley Park                                                                                                                                                  | Wellcome Sanger Institute for the COVID-19 Genomics UK (COG-UK) Consortium | Jacquelyn Wynn, Mairead Hyland, The Lighthouse Lab in Alderley Park and Alex Alderton, Roberto Amato, Sonia Goncalves, Ewan Harrison, David K. Jackson, Ian Johnston, Dominic Kwiatkowski, Cordelia Langford, John Sillitoe on behalf of the Wellcome Sanger Institute COVID-19 Surveillance Team                                                                        |
| EPI_ISL_907415                                                                                                                                                                                                                                                                                                                                                                                                                                                                                                                                                                                                                                                                                                                                                                                                                                                                                                                                                                                                                                                                                                                                                                                                                                                                                                                                                                                                                                                                                                                                                                                                                                                                                                                                                                                                                                                                                                                                                                                                                                                                                                                                                                                                                                                                                                                                                                                                                                                                                                                                                                                                                                                                                                                                                                                                                 | Lighthouse Lab in Glasgow                                                                                                                                                        | Wellcome Sanger Institute for the COVID-19 Genomics UK (COG-UK) Consortium | Harper VanSteenhouse, Yumi Kasai, David Gray, Carol Clugston, Anna Dominiczak and Alex Alderton, Roberto Amato, Sonia Goncalves, Ewan Harrison, David K. Jackson, Ian Johnston, Dominic Kwiatkowski, Cordelia Langford, John Sillitoe on behalf of the Wellcome Sanger Institute COVID-19 Surveillance Team                                                              |
| EPI_ISL_907416                                                                                                                                                                                                                                                                                                                                                                                                                                                                                                                                                                                                                                                                                                                                                                                                                                                                                                                                                                                                                                                                                                                                                                                                                                                                                                                                                                                                                                                                                                                                                                                                                                                                                                                                                                                                                                                                                                                                                                                                                                                                                                                                                                                                                                                                                                                                                                                                                                                                                                                                                                                                                                                                                                                                                                                                                 | Lighthouse Lab in Alderley Park                                                                                                                                                  | Wellcome Sanger Institute for the COVID-19 Genomics UK (COG-UK) Consortium | Jacquelyn Wynn, Mairead Hyland, The Lighthouse Lab in Alderley Park and Alex Alderton, Roberto Amato, Sonia Goncalves, Ewan Harrison, David K. Jackson, Ian Johnston, Dominic Kwiatkowski, Cordelia Langford, John Sillitoe on behalf of the Wellcome Sanger Institute COVID-19 Surveillance Team                                                                        |
| EPI_ISL_907418, EPI_ISL_907419, EPI_ISL_907420, EPI_ISL_907421                                                                                                                                                                                                                                                                                                                                                                                                                                                                                                                                                                                                                                                                                                                                                                                                                                                                                                                                                                                                                                                                                                                                                                                                                                                                                                                                                                                                                                                                                                                                                                                                                                                                                                                                                                                                                                                                                                                                                                                                                                                                                                                                                                                                                                                                                                                                                                                                                                                                                                                                                                                                                                                                                                                                                                 | Lighthouse Lab in Glasgow                                                                                                                                                        | Wellcome Sanger Institute for the COVID-19 Genomics UK (COG-UK) Consortium | Harper VanSteenhouse, Yumi Kasai, David Gray, Carol Clugston, Anna Dominiczak and Alex Alderton, Roberto Amato, Sonia Goncalves, Ewan Harrison, David K. Jackson, Ian Johnston, Dominic Kwiatkowski, Cordelia Langford, John Sillitoe on behalf of the Wellcome Sanger Institute COVID-19 Surveillance Team                                                              |

[illegible]

[illegible]

[illegible]

[illegible]



[illegible]

|                                                                                                                                                                                                                                                                                                                                                                                                                                                                                                                                                                                                                                                                                                                                                                                                                                                                                                                                                                                                                                                                                                                                                                                                                                                                                                                                                                                                                                                                                                                                                                                                                                                                                                                                                                                                                                                                                                                                                                                                                                                                                                                                                                                                                                                                                                                                                                                                                                                                                                                                                                                                                                                                                                                                                                                                                                                                                                                                                                                                                                                                                                                                                                                                                                                                                                                                                                                                                                                                                                                                                                                                                                                                                                                                                                                                                                |           |                                                                                                                                                                                                                     |                                                                            |                                                                                                                                                                                                                                                                                                                                                                                                                                                                                                                                                                                                                                                                                           |
|--------------------------------------------------------------------------------------------------------------------------------------------------------------------------------------------------------------------------------------------------------------------------------------------------------------------------------------------------------------------------------------------------------------------------------------------------------------------------------------------------------------------------------------------------------------------------------------------------------------------------------------------------------------------------------------------------------------------------------------------------------------------------------------------------------------------------------------------------------------------------------------------------------------------------------------------------------------------------------------------------------------------------------------------------------------------------------------------------------------------------------------------------------------------------------------------------------------------------------------------------------------------------------------------------------------------------------------------------------------------------------------------------------------------------------------------------------------------------------------------------------------------------------------------------------------------------------------------------------------------------------------------------------------------------------------------------------------------------------------------------------------------------------------------------------------------------------------------------------------------------------------------------------------------------------------------------------------------------------------------------------------------------------------------------------------------------------------------------------------------------------------------------------------------------------------------------------------------------------------------------------------------------------------------------------------------------------------------------------------------------------------------------------------------------------------------------------------------------------------------------------------------------------------------------------------------------------------------------------------------------------------------------------------------------------------------------------------------------------------------------------------------------------------------------------------------------------------------------------------------------------------------------------------------------------------------------------------------------------------------------------------------------------------------------------------------------------------------------------------------------------------------------------------------------------------------------------------------------------------------------------------------------------------------------------------------------------------------------------------------------------------------------------------------------------------------------------------------------------------------------------------------------------------------------------------------------------------------------------------------------------------------------------------------------------------------------------------------------------------------------------------------------------------------------------------------------------|-----------|---------------------------------------------------------------------------------------------------------------------------------------------------------------------------------------------------------------------|----------------------------------------------------------------------------|-------------------------------------------------------------------------------------------------------------------------------------------------------------------------------------------------------------------------------------------------------------------------------------------------------------------------------------------------------------------------------------------------------------------------------------------------------------------------------------------------------------------------------------------------------------------------------------------------------------------------------------------------------------------------------------------|
| EPI_ISL_917609, EPI_ISL_917610, EPI_ISL_917611, EPI_ISL_917612, EPI_ISL_917613, EPI_ISL_917614, EPI_ISL_917615, EPI_ISL_917616, EPI_ISL_917617, EPI_ISL_917618, EPI_ISL_917619, EPI_ISL_917620, EPI_ISL_917621, EPI_ISL_917622, EPI_ISL_917623, EPI_ISL_917624, EPI_ISL_917625, EPI_ISL_917626, EPI_ISL_917627, EPI_ISL_917628, EPI_ISL_917629, EPI_ISL_917630, EPI_ISL_917631, EPI_ISL_917632, EPI_ISL_917633, EPI_ISL_917634, EPI_ISL_917635, EPI_ISL_917636, EPI_ISL_917637, EPI_ISL_917638, EPI_ISL_917639, EPI_ISL_917640, EPI_ISL_917641, EPI_ISL_917642, EPI_ISL_917643, EPI_ISL_917644, EPI_ISL_917645, EPI_ISL_917646, EPI_ISL_917647, EPI_ISL_917648, EPI_ISL_917649, EPI_ISL_917650, EPI_ISL_917651, EPI_ISL_917652, EPI_ISL_917653, EPI_ISL_917654, EPI_ISL_917655, EPI_ISL_917656, EPI_ISL_917657, EPI_ISL_917658, EPI_ISL_917659, EPI_ISL_917660, EPI_ISL_917661, EPI_ISL_917662, EPI_ISL_917663, EPI_ISL_917664, EPI_ISL_917665, EPI_ISL_917666, EPI_ISL_917668, EPI_ISL_917669, EPI_ISL_917671, EPI_ISL_917672, EPI_ISL_917673, EPI_ISL_917674, EPI_ISL_917675, EPI_ISL_917676, EPI_ISL_917677, EPI_ISL_917678, EPI_ISL_917679, EPI_ISL_917680, EPI_ISL_917681, EPI_ISL_917682, EPI_ISL_917683, EPI_ISL_917684, EPI_ISL_917685, EPI_ISL_917686, EPI_ISL_917687, EPI_ISL_917688, EPI_ISL_917689, EPI_ISL_917690, EPI_ISL_917691, EPI_ISL_917692, EPI_ISL_917693, EPI_ISL_917694, EPI_ISL_917695, EPI_ISL_917696, EPI_ISL_917697, EPI_ISL_917698, EPI_ISL_917699, EPI_ISL_917700, EPI_ISL_917701, EPI_ISL_917702, EPI_ISL_917703, EPI_ISL_917704, EPI_ISL_917705, EPI_ISL_917706, EPI_ISL_917707, EPI_ISL_917708, EPI_ISL_917709, EPI_ISL_917710, EPI_ISL_917711, EPI_ISL_917712, EPI_ISL_917713, EPI_ISL_917714, EPI_ISL_917715, EPI_ISL_917716, EPI_ISL_917717, EPI_ISL_917718, EPI_ISL_917719, EPI_ISL_917720, EPI_ISL_917721, EPI_ISL_917722, EPI_ISL_917723, EPI_ISL_917724, EPI_ISL_917725, EPI_ISL_917726, EPI_ISL_917727, EPI_ISL_917728, EPI_ISL_917729, EPI_ISL_917730, EPI_ISL_917731, EPI_ISL_917732, EPI_ISL_917733, EPI_ISL_917734, EPI_ISL_917735, EPI_ISL_917736, EPI_ISL_917737, EPI_ISL_917738, EPI_ISL_917739, EPI_ISL_917741, EPI_ISL_917742, EPI_ISL_917744, EPI_ISL_917745, EPI_ISL_917746, EPI_ISL_917747, EPI_ISL_917748, EPI_ISL_917749, EPI_ISL_917750, EPI_ISL_917751, EPI_ISL_917752, EPI_ISL_917754, EPI_ISL_917755, EPI_ISL_917756, EPI_ISL_917757, EPI_ISL_917758, EPI_ISL_917759, EPI_ISL_917760, EPI_ISL_917761, EPI_ISL_917762, EPI_ISL_917763, EPI_ISL_917764, EPI_ISL_917765, EPI_ISL_917766, EPI_ISL_917767, EPI_ISL_917768, EPI_ISL_917769, EPI_ISL_917770, EPI_ISL_917771, EPI_ISL_917772, EPI_ISL_917773, EPI_ISL_917774, EPI_ISL_917775, EPI_ISL_917776, EPI_ISL_917777, EPI_ISL_917778, EPI_ISL_917779, EPI_ISL_917780, EPI_ISL_917781, EPI_ISL_917782, EPI_ISL_917783, EPI_ISL_917784, EPI_ISL_917785, EPI_ISL_917786, EPI_ISL_917787, EPI_ISL_917788, EPI_ISL_917789, EPI_ISL_917790, EPI_ISL_917791, EPI_ISL_917792, EPI_ISL_917793, EPI_ISL_917794, EPI_ISL_917795, EPI_ISL_917796, EPI_ISL_917797, EPI_ISL_917798, EPI_ISL_917799, EPI_ISL_917800, EPI_ISL_917801, EPI_ISL_917802, EPI_ISL_917803, EPI_ISL_917804, EPI_ISL_917805, EPI_ISL_917806, EPI_ISL_917807, EPI_ISL_917808, EPI_ISL_917809, EPI_ISL_917810, EPI_ISL_917811, EPI_ISL_917812, EPI_ISL_917813, EPI_ISL_917814, EPI_ISL_917815, EPI_ISL_917816, EPI_ISL_917817, EPI_ISL_917818, EPI_ISL_917819, EPI_ISL_917820, EPI_ISL_917821, EPI_ISL_917822, EPI_ISL_917823, EPI_ISL_917824, EPI_ISL_917825, EPI_ISL_917826, EPI_ISL_917827, EPI_ISL_917828, EPI_ISL_917829, EPI_ISL_917830, EPI_ISL_917831, EPI_ISL_917832, EPI_ISL_917833, EPI_ISL_917834, EPI_ISL_917835, EPI_ISL_917836, EPI_ISL_917837, EPI_ISL_917838, EPI_ISL_917839, EPI_ISL_917840, EPI_ISL_917841, EPI_ISL_917842, EPI_ISL_917843 | see above | Lighthouse Lab in Alderley Park                                                                                                                                                                                     | Wellcome Sanger Institute for the COVID-19 Genomics UK (COG-UK) Consortium | Jacquelyn Wynn, Mairead Hyland, The Lighthouse Lab in Alderley Park and Alex Alderton, Roberto Amato, Sonia Goncalves, Ewan Harrison, David K. Jackson, Ian Johnston, Dominic Kwiatkowski, Cordelia Langford, John Sillitoe on behalf of the Wellcome Sanger Institute COVID-19 Surveillance Team                                                                                                                                                                                                                                                                                                                                                                                         |
| EPI_ISL_917844, EPI_ISL_917845, EPI_ISL_917846, EPI_ISL_917848, EPI_ISL_917985, EPI_ISL_917986, EPI_ISL_917987, EPI_ISL_917988, EPI_ISL_917989, EPI_ISL_917990, EPI_ISL_917992, EPI_ISL_917993                                                                                                                                                                                                                                                                                                                                                                                                                                                                                                                                                                                                                                                                                                                                                                                                                                                                                                                                                                                                                                                                                                                                                                                                                                                                                                                                                                                                                                                                                                                                                                                                                                                                                                                                                                                                                                                                                                                                                                                                                                                                                                                                                                                                                                                                                                                                                                                                                                                                                                                                                                                                                                                                                                                                                                                                                                                                                                                                                                                                                                                                                                                                                                                                                                                                                                                                                                                                                                                                                                                                                                                                                                 | see above | Lighthouse Lab in Glasgow                                                                                                                                                                                           | Wellcome Sanger Institute for the COVID-19 Genomics UK (COG-UK) Consortium | Harper VanSteenhouse, Yumi Kasai, David Gray, Carol Clugston, Anna Dominiczak and Alex Alderton, Roberto Amato, Sonia Goncalves, Ewan Harrison, David K. Jackson, Ian Johnston, Dominic Kwiatkowski, Cordelia Langford, John Sillitoe on behalf of the Wellcome Sanger Institute COVID-19 Surveillance Team                                                                                                                                                                                                                                                                                                                                                                               |
| EPI_ISL_919108, EPI_ISL_919109, EPI_ISL_919110, EPI_ISL_919111, EPI_ISL_919112, EPI_ISL_919113, EPI_ISL_919116, EPI_ISL_919117, EPI_ISL_919118, EPI_ISL_919120, EPI_ISL_919121, EPI_ISL_919122, EPI_ISL_919123, EPI_ISL_919124, EPI_ISL_919125, EPI_ISL_919126, EPI_ISL_919127, EPI_ISL_919129, EPI_ISL_919131, EPI_ISL_919132, EPI_ISL_919133, EPI_ISL_919135, EPI_ISL_919137, EPI_ISL_919138, EPI_ISL_919140, EPI_ISL_919141, EPI_ISL_919144, EPI_ISL_919145                                                                                                                                                                                                                                                                                                                                                                                                                                                                                                                                                                                                                                                                                                                                                                                                                                                                                                                                                                                                                                                                                                                                                                                                                                                                                                                                                                                                                                                                                                                                                                                                                                                                                                                                                                                                                                                                                                                                                                                                                                                                                                                                                                                                                                                                                                                                                                                                                                                                                                                                                                                                                                                                                                                                                                                                                                                                                                                                                                                                                                                                                                                                                                                                                                                                                                                                                                 | see above | Department of Pathology, University of Cambridge                                                                                                                                                                    | COVID-19 Genomics UK (COG-UK) Consortium                                   | Aminu S. Jahun, Yasmin Chaudhry, Iliana Georgana, Myra Hosmillo, Rhys Izu, Martin D. Curran, Surendra Parmar, Ian Goodfellow                                                                                                                                                                                                                                                                                                                                                                                                                                                                                                                                                              |
| EPI_ISL_919291, EPI_ISL_919292, EPI_ISL_919293, EPI_ISL_919294, EPI_ISL_919295, EPI_ISL_919296, EPI_ISL_919297, EPI_ISL_919298, EPI_ISL_919299, EPI_ISL_919300, EPI_ISL_919302, EPI_ISL_919303, EPI_ISL_919304, EPI_ISL_919305, EPI_ISL_919306, EPI_ISL_919307                                                                                                                                                                                                                                                                                                                                                                                                                                                                                                                                                                                                                                                                                                                                                                                                                                                                                                                                                                                                                                                                                                                                                                                                                                                                                                                                                                                                                                                                                                                                                                                                                                                                                                                                                                                                                                                                                                                                                                                                                                                                                                                                                                                                                                                                                                                                                                                                                                                                                                                                                                                                                                                                                                                                                                                                                                                                                                                                                                                                                                                                                                                                                                                                                                                                                                                                                                                                                                                                                                                                                                 | see above | West of Scotland Specialist Virology Centre, NHSGGC / MRC-University of Glasgow Centre for Virus Research                                                                                                           | COVID-19 Genomics UK (COG-UK) Consortium                                   | Ana da Silva Filipe, Natasha Johnson, Kathy Smollett, Daniel Mair, Stephen Carmichael, Alice Broos, Lily Tong, Jenna Nichols, Kyriaki Nomikou; Sarah McDonald; Richard Orton, Joseph Hughes, Sreenu Vattipally, David L Robertson; Alasdair MacLean, Rory Gunson; Sharif Shaaban, Matthew Holden; Rachel Blacow, Guy Mollett, Kathy Li, James Shepherd, Antonia Ho, Emma Thomson                                                                                                                                                                                                                                                                                                          |
| EPI_ISL_919404                                                                                                                                                                                                                                                                                                                                                                                                                                                                                                                                                                                                                                                                                                                                                                                                                                                                                                                                                                                                                                                                                                                                                                                                                                                                                                                                                                                                                                                                                                                                                                                                                                                                                                                                                                                                                                                                                                                                                                                                                                                                                                                                                                                                                                                                                                                                                                                                                                                                                                                                                                                                                                                                                                                                                                                                                                                                                                                                                                                                                                                                                                                                                                                                                                                                                                                                                                                                                                                                                                                                                                                                                                                                                                                                                                                                                 |           | Virology Department, Royal Infirmary of Edinburgh, NHS Lothian / School of Biological Sciences, University of Edinburgh / Institute of Genetics and Molecular Medicine, University of Edinburgh                     | COVID-19 Genomics UK (COG-UK) Consortium                                   | McHugh M, Dewar R, Rooke S, Gallagher M, Balcaza C, O'Toole Á, Scher E, Hill V, McCrone TJ, Colquhoun R, Yu X, Jackson B, Rambaut A, Williams TC, Templeton K                                                                                                                                                                                                                                                                                                                                                                                                                                                                                                                             |
| EPI_ISL_919621, EPI_ISL_919622, EPI_ISL_919624, EPI_ISL_919625, EPI_ISL_919626, EPI_ISL_919627, EPI_ISL_919664, EPI_ISL_919665, EPI_ISL_919666, EPI_ISL_919667, EPI_ISL_919668, EPI_ISL_919669, EPI_ISL_919670, EPI_ISL_919671, EPI_ISL_919672, EPI_ISL_919673, EPI_ISL_919674, EPI_ISL_919676, EPI_ISL_919678, EPI_ISL_919679, EPI_ISL_919680, EPI_ISL_919681, EPI_ISL_919682, EPI_ISL_919684, EPI_ISL_919685, EPI_ISL_919686, EPI_ISL_919687, EPI_ISL_919689, EPI_ISL_919692, EPI_ISL_919693, EPI_ISL_919694, EPI_ISL_919696, EPI_ISL_919697, EPI_ISL_919698, EPI_ISL_919699, EPI_ISL_919700, EPI_ISL_919701, EPI_ISL_919702, EPI_ISL_919703, EPI_ISL_919704, EPI_ISL_919705                                                                                                                                                                                                                                                                                                                                                                                                                                                                                                                                                                                                                                                                                                                                                                                                                                                                                                                                                                                                                                                                                                                                                                                                                                                                                                                                                                                                                                                                                                                                                                                                                                                                                                                                                                                                                                                                                                                                                                                                                                                                                                                                                                                                                                                                                                                                                                                                                                                                                                                                                                                                                                                                                                                                                                                                                                                                                                                                                                                                                                                                                                                                                 | see above | Liverpool Clinical Laboratories                                                                                                                                                                                     | COVID-19 Genomics UK (COG-UK) Consortium                                   | Sam Haldenby, Anita Lucaci, Steve Paterson, Julian Hiscox, Alistair Darby, M Almsaud, A Alrezaihi, Muhannad Alruwaili, Stuart D Armstrong, Jones Benjamin, Eleanor G Bentley, Anu Chawla, Jordan J Clark, Angela Cowell, Richard Eccles, Isabel Garcia-Dorival, Matthew Gemmell, Alessandro Gerada, PKF Gilmore, Richard Gregory, Ximeng Han, Catherine Hartley, Margaret Hughes, Miren Iturriza-Gomara, James Johnson, L Luu, Jennifer Manson, Charlotte Nelson, Elaine O'Toole, Cassie Olateju, Rebekah Penrice-Randal , Lucille Rainbow, N.P Randle, Trevor Ian Robinson, Parul Sharma, Ghada T Shawli, James P Stewart, Neil Swainston, Ecatarina Vamos, Joanne Watts, Mark Whitehead |
| EPI_ISL_919776, EPI_ISL_919777, EPI_ISL_919778, EPI_ISL_919856, EPI_ISL_919857, EPI_ISL_919858, EPI_ISL_919859, EPI_ISL_919860, EPI_ISL_919861, EPI_ISL_919862, EPI_ISL_919863, EPI_ISL_919864, EPI_ISL_919865, EPI_ISL_919866, EPI_ISL_919867, EPI_ISL_919868, EPI_ISL_919869, EPI_ISL_919870, EPI_ISL_919871, EPI_ISL_919872, EPI_ISL_919873, EPI_ISL_919874, EPI_ISL_919875, EPI_ISL_919876, EPI_ISL_919877, EPI_ISL_919878, EPI_ISL_919879, EPI_ISL_919880, EPI_ISL_919881, EPI_ISL_919882, EPI_ISL_919883, EPI_ISL_919885, EPI_ISL_919886, EPI_ISL_919887, EPI_ISL_919888, EPI_ISL_919889, EPI_ISL_919890, EPI_ISL_919891, EPI_ISL_919893, EPI_ISL_919894, EPI_ISL_919895, EPI_ISL_919895, EPI_ISL_919957, EPI_ISL_920073, EPI_ISL_920074, EPI_ISL_920075, EPI_ISL_920076, EPI_ISL_920077, EPI_ISL_920078, EPI_ISL_920081, EPI_ISL_920082, EPI_ISL_920083, EPI_ISL_920084, EPI_ISL_920085, EPI_ISL_920086, EPI_ISL_920087, EPI_ISL_920088, EPI_ISL_920089, EPI_ISL_920091, EPI_ISL_920117, EPI_ISL_920118, EPI_ISL_920119, EPI_ISL_920120, EPI_ISL_920121, EPI_ISL_920122, EPI_ISL_920123, EPI_ISL_920124, EPI_ISL_920125, EPI_ISL_920126, EPI_ISL_920127, EPI_ISL_920128, EPI_ISL_920129, EPI_ISL_920130, EPI_ISL_920131, EPI_ISL_920132, EPI_ISL_920133, EPI_ISL_920134, EPI_ISL_920135, EPI_ISL_920136, EPI_ISL_920137, EPI_ISL_920138, EPI_ISL_920139, EPI_ISL_920140, EPI_ISL_920141, EPI_ISL_920142, EPI_ISL_920143, EPI_ISL_920144, EPI_ISL_920145, EPI_ISL_920146, EPI_ISL_920147, EPI_ISL_920148, EPI_ISL_920149, EPI_ISL_920150, EPI_ISL_920151, EPI_ISL_920153, EPI_ISL_920154, EPI_ISL_920155, EPI_ISL_920158, EPI_ISL_920164, EPI_ISL_920166, EPI_ISL_920167, EPI_ISL_920168, EPI_ISL_920169, EPI_ISL_920170, EPI_ISL_920171, EPI_ISL_920172, EPI_ISL_920173                                                                                                                                                                                                                                                                                                                                                                                                                                                                                                                                                                                                                                                                                                                                                                                                                                                                                                                                                                                                                                                                                                                                                                                                                                                                                                                                                                                                                                                                                                                                                                                                                                                                                                                                                                                                                                                                                                                                                                                                                                                 | see above | University College London, Great Ormond Street Hospital for Children NHS Foundation Trust, Imperial College Healthcare NHS Trust                                                                                    | COVID-19 Genomics UK (COG-UK) Consortium                                   | Sergi Castellano, Rachel Williams, Mark Kristiansen, Paola Resende Silva, Sunando Roy, Tony Brooks, Helena Tutill, Paola Niola, Patricia Dyal, Charlotte Williams, Leysa Forrest, Yasmin Panchbhaya, Jacqueline Findlay, Samuel Weeks, Julianne Brown, Kathryn Harris, Paul Randell, James Price, Alison Holmes, Judith Breuer                                                                                                                                                                                                                                                                                                                                                            |
| EPI_ISL_920463, EPI_ISL_920472, EPI_ISL_920480, EPI_ISL_920488, EPI_ISL_920523, EPI_ISL_920524, EPI_ISL_920525, EPI_ISL_920531, EPI_ISL_920533, EPI_ISL_920534, EPI_ISL_920535, EPI_ISL_920541, EPI_ISL_920543, EPI_ISL_920545, EPI_ISL_920546, EPI_ISL_920552, EPI_ISL_920553, EPI_ISL_920556, EPI_ISL_920557, EPI_ISL_920560, EPI_ISL_920562, EPI_ISL_920563, EPI_ISL_920565, EPI_ISL_920566, EPI_ISL_920570, EPI_ISL_920571, EPI_ISL_920572, EPI_ISL_920573, EPI_ISL_920578, EPI_ISL_920580, EPI_ISL_920582, EPI_ISL_920585, EPI_ISL_920588, EPI_ISL_920589, EPI_ISL_920590, EPI_ISL_920592, EPI_ISL_920593, EPI_ISL_920597, EPI_ISL_920598, EPI_ISL_920599, EPI_ISL_920600, EPI_ISL_920601, EPI_ISL_920602, EPI_ISL_920604, EPI_ISL_920605, EPI_ISL_920606, EPI_ISL_920607, EPI_ISL_920608, EPI_ISL_920614, EPI_ISL_920615, EPI_ISL_920616, EPI_ISL_920622, EPI_ISL_920623, EPI_ISL_920624, EPI_ISL_920625, EPI_ISL_920626, EPI_ISL_920633, EPI_ISL_920634, EPI_ISL_920636, EPI_ISL_920638, EPI_ISL_920639, EPI_ISL_920640, EPI_ISL_920641, EPI_ISL_920642, EPI_ISL_920643, EPI_ISL_920648, EPI_ISL_920649, EPI_ISL_920650, EPI_ISL_920654, EPI_ISL_920655, EPI_ISL_920656, EPI_ISL_920657, EPI_ISL_920662, EPI_ISL_920663, EPI_ISL_920664, EPI_ISL_920665, EPI_ISL_920668, EPI_ISL_920669, EPI_ISL_920672, EPI_ISL_920673, EPI_ISL_920675, EPI_ISL_920677, EPI_ISL_920678, EPI_ISL_920679, EPI_ISL_920681, EPI_ISL_920682, EPI_ISL_920684, EPI_ISL_920686, EPI_ISL_920687, EPI_ISL_920690, EPI_ISL_920692, EPI_ISL_920694, EPI_ISL_920695, EPI_ISL_920698, EPI_ISL_920699, EPI_ISL_920703, EPI_ISL_920704, EPI_ISL_920707, EPI_ISL_920708, EPI_ISL_920710, EPI_ISL_920711, EPI_ISL_920712, EPI_ISL_920713, EPI_ISL_920715, EPI_ISL_920716, EPI_ISL_920718, EPI_ISL_920726, EPI_ISL_920727, EPI_ISL_920728, EPI_ISL_920740, EPI_ISL_920741, EPI_ISL_920742, EPI_ISL_920743, EPI_ISL_920749, EPI_ISL_920750, EPI_ISL_920751, EPI_ISL_920759, EPI_ISL_920760, EPI_ISL_920764, EPI_ISL_920766, EPI_ISL_920769, EPI_ISL_920772, EPI_ISL_920778                                                                                                                                                                                                                                                                                                                                                                                                                                                                                                                                                                                                                                                                                                                                                                                                                                                                                                                                                                                                                                                                                                                                                                                                                                                                                                                                                                                                                                                                                                                                                                                                                                                                                                                                                                                 | see above | University College London Hospital                                                                                                                                                                                  | COVID-19 Genomics UK (COG-UK) Consortium                                   | Judith Heaney, Matthew Byott, Catherine Houlihan, Dan Frampton, Stuart Kirk, Moira Spyer and Eleni Nastouli                                                                                                                                                                                                                                                                                                                                                                                                                                                                                                                                                                               |
| EPI_ISL_920819, EPI_ISL_920821, EPI_ISL_920822, EPI_ISL_920825, EPI_ISL_920827, EPI_ISL_920828, EPI_ISL_920838                                                                                                                                                                                                                                                                                                                                                                                                                                                                                                                                                                                                                                                                                                                                                                                                                                                                                                                                                                                                                                                                                                                                                                                                                                                                                                                                                                                                                                                                                                                                                                                                                                                                                                                                                                                                                                                                                                                                                                                                                                                                                                                                                                                                                                                                                                                                                                                                                                                                                                                                                                                                                                                                                                                                                                                                                                                                                                                                                                                                                                                                                                                                                                                                                                                                                                                                                                                                                                                                                                                                                                                                                                                                                                                 |           | University College London, Great Ormond Street Hospital for Children NHS Foundation Trust, Imperial College Healthcare NHS Trust                                                                                    | COVID-19 Genomics UK (COG-UK) Consortium                                   | Sergi Castellano, Rachel Williams, Mark Kristiansen, Paola Resende Silva, Sunando Roy, Tony Brooks, Helena Tutill, Paola Niola, Patricia Dyal, Charlotte Williams, Leysa Forrest, Yasmin Panchbhaya, Jacqueline Findlay, Samuel Weeks, Julianne Brown, Kathryn Harris, Paul Randell, James Price, Alison Holmes, Judith Breuer                                                                                                                                                                                                                                                                                                                                                            |
| EPI_ISL_921637, EPI_ISL_921638, EPI_ISL_921639, EPI_ISL_921640, EPI_ISL_921642, EPI_ISL_921643, EPI_ISL_921644, EPI_ISL_921645, EPI_ISL_921646, EPI_ISL_921647, EPI_ISL_921648, EPI_ISL_921649, EPI_ISL_921650, EPI_ISL_921651, EPI_ISL_921652, EPI_ISL_921653, EPI_ISL_921654, EPI_ISL_921655, EPI_ISL_921656, EPI_ISL_921657, EPI_ISL_921658                                                                                                                                                                                                                                                                                                                                                                                                                                                                                                                                                                                                                                                                                                                                                                                                                                                                                                                                                                                                                                                                                                                                                                                                                                                                                                                                                                                                                                                                                                                                                                                                                                                                                                                                                                                                                                                                                                                                                                                                                                                                                                                                                                                                                                                                                                                                                                                                                                                                                                                                                                                                                                                                                                                                                                                                                                                                                                                                                                                                                                                                                                                                                                                                                                                                                                                                                                                                                                                                                 | see above | Northumbria University / South Tees Hospitals NHS Foundation Trust / North Cumbria Integrated Care NHS Foundation Trust / North Tees and Hartlepool NHS Foundation Trust / Newcastle Hospitals NHS Foundation Trust | COVID-19 Genomics UK (COG-UK) Consortium                                   | Darren L Smith,Andrew Nelson,Matthew Bashton,Greg R Young,Joshua Loh,John Allan,Mohammad A Tariq,Giles S Holt,Gary Black,Wen C Yew,Lynn Dover,Paul Baker,Steve Liggett,Sarah Essex,Jane Greenaway,Debra Padgett,Clive Graham,Garren Scott,Edward Barton,Emma Swindells,Brendan Payne,Jennifer Collins,Yusri Taha,Gary Eltringham                                                                                                                                                                                                                                                                                                                                                          |
| EPI_ISL_922008, EPI_ISL_922009, EPI_ISL_922010, EPI_ISL_922011, EPI_ISL_922012, EPI_ISL_922013, EPI_ISL_922014, EPI_ISL_922015, EPI_ISL_922016, EPI_ISL_922017, EPI_ISL_922018, EPI_ISL_922019, EPI_ISL_922020, EPI_ISL_922021, EPI_ISL_922022, EPI_ISL_922023, EPI_ISL_922024, EPI_ISL_922025, EPI_ISL_922026, EPI_ISL_922027, EPI_ISL_922028, EPI_ISL_922030, EPI_ISL_922031, EPI_ISL_922032, EPI_ISL_922033, EPI_ISL_922034, EPI_ISL_922035, EPI_ISL_922036                                                                                                                                                                                                                                                                                                                                                                                                                                                                                                                                                                                                                                                                                                                                                                                                                                                                                                                                                                                                                                                                                                                                                                                                                                                                                                                                                                                                                                                                                                                                                                                                                                                                                                                                                                                                                                                                                                                                                                                                                                                                                                                                                                                                                                                                                                                                                                                                                                                                                                                                                                                                                                                                                                                                                                                                                                                                                                                                                                                                                                                                                                                                                                                                                                                                                                                                                                 | see above | Queens Medical Centre, Clinical Microbiology Department / DeepSeq Nottingham                                                                                                                                        | COVID-19 Genomics UK (COG-UK) Consortium                                   | Gemma Clark, Wendy Smith, Manjinder Khakh, Vicki M Fleming, Michelle M Lister, Hannah Howson-Wells, Jonathan Ball, Patrick McClure, Joseph Chappell, Theocharis Tsoleridis, Nadine Holmes, Matthew Carlisle, Christopher Moore, Fei Sang, Johnny Debebe, Victoria Wright, Matthew Loose                                                                                                                                                                                                                                                                                                                                                                                                   |
| EPI_ISL_922891, EPI_ISL_922941, EPI_ISL_922949, EPI_ISL_922950, EPI_ISL_922953, EPI_ISL_922954, EPI_ISL_922955, EPI_ISL_922959, EPI_ISL_922960, EPI_ISL_922961, EPI_ISL_923159, EPI_ISL_923187, EPI_ISL_923199, EPI_ISL_923203, EPI_ISL_923205, EPI_ISL_923206, EPI_ISL_923208, EPI_ISL_923209, EPI_ISL_923210, EPI_ISL_923211                                                                                                                                                                                                                                                                                                                                                                                                                                                                                                                                                                                                                                                                                                                                                                                                                                                                                                                                                                                                                                                                                                                                                                                                                                                                                                                                                                                                                                                                                                                                                                                                                                                                                                                                                                                                                                                                                                                                                                                                                                                                                                                                                                                                                                                                                                                                                                                                                                                                                                                                                                                                                                                                                                                                                                                                                                                                                                                                                                                                                                                                                                                                                                                                                                                                                                                                                                                                                                                                                                 | see above | Wales Specialist Virology Centre Sequencing lab: Pathogen Genomics Unit                                                                                                                                             | Public Health Wales Microbiology Cardiff Wales Specialist Virology Centre  | Catherine Moore, Johnathan Evans, Laura Gifford, Malorie Perry, Simon Cottrell, Angela Marchbank, Alec Birchley, Alexander Adams, Amy Gaskin, Bree Gatica-Wilcox, Jason Coombes, Joel Southgate, Lauren Gilbert, Lee Graham, Nicole Pacchiarni, Sara Kumziene-Summerhayes, Sarah Taylor, Sophie Jones, Sara Rey, Matthew Bull, Joanne Watkins, Sally Corden, Tom Connor                                                                                                                                                                                                                                                                                                                   |
| EPI_ISL_923422, EPI_ISL_923423,                                                                                                                                                                                                                                                                                                                                                                                                                                                                                                                                                                                                                                                                                                                                                                                                                                                                                                                                                                                                                                                                                                                                                                                                                                                                                                                                                                                                                                                                                                                                                                                                                                                                                                                                                                                                                                                                                                                                                                                                                                                                                                                                                                                                                                                                                                                                                                                                                                                                                                                                                                                                                                                                                                                                                                                                                                                                                                                                                                                                                                                                                                                                                                                                                                                                                                                                                                                                                                                                                                                                                                                                                                                                                                                                                                                                |           | Centre for Enzyme Innovation, University of Portsmouth /                                                                                                                                                            | COVID-19 Genomics UK (COG-UK) Consortium                                   | Angela Beckett,Salman Goudarzi,Christopher Fearn,Kate Cook,Katie Loveson,Sharon Glaysher,Scott Elliott,Samuel Robson                                                                                                                                                                                                                                                                                                                                                                                                                                                                                                                                                                      |

| EPI_ISL_923424                                                                                                                                                                                                                                                                                                                                                                                                                                                                                                                                                                                                                                                                                                                                                                                                                                                                                                                                                                                                                                                                                                                                                                                                                                                                                                                                                                                                                                                                                                                                                                                                 | Translational Research Laboratory, Portsmouth Hospitals NHS Trust                                                                                                                |                                                                            |                                                                                                                                                                                                                                                                                                             |
|----------------------------------------------------------------------------------------------------------------------------------------------------------------------------------------------------------------------------------------------------------------------------------------------------------------------------------------------------------------------------------------------------------------------------------------------------------------------------------------------------------------------------------------------------------------------------------------------------------------------------------------------------------------------------------------------------------------------------------------------------------------------------------------------------------------------------------------------------------------------------------------------------------------------------------------------------------------------------------------------------------------------------------------------------------------------------------------------------------------------------------------------------------------------------------------------------------------------------------------------------------------------------------------------------------------------------------------------------------------------------------------------------------------------------------------------------------------------------------------------------------------------------------------------------------------------------------------------------------------|----------------------------------------------------------------------------------------------------------------------------------------------------------------------------------|----------------------------------------------------------------------------|-------------------------------------------------------------------------------------------------------------------------------------------------------------------------------------------------------------------------------------------------------------------------------------------------------------|
| EPI_ISL_924080, EPI_ISL_924081, EPI_ISL_924090, EPI_ISL_924095, EPI_ISL_924100, EPI_ISL_924110, EPI_ISL_924113, EPI_ISL_924115, EPI_ISL_924116, EPI_ISL_924120, EPI_ISL_924124, EPI_ISL_924130, EPI_ISL_924133, EPI_ISL_924134, EPI_ISL_924135, EPI_ISL_924137, EPI_ISL_924139, EPI_ISL_924140, EPI_ISL_924143, EPI_ISL_924147, EPI_ISL_924151, EPI_ISL_924154, EPI_ISL_924156, EPI_ISL_924161, EPI_ISL_924162, EPI_ISL_924171, EPI_ISL_924175, EPI_ISL_924179, EPI_ISL_924180, EPI_ISL_924188, EPI_ISL_924190, EPI_ISL_924192, EPI_ISL_924194, EPI_ISL_924195, EPI_ISL_924202, EPI_ISL_924205, EPI_ISL_924210, EPI_ISL_924211, EPI_ISL_924214, EPI_ISL_924219, EPI_ISL_924221, EPI_ISL_924222, EPI_ISL_924226, EPI_ISL_924232, EPI_ISL_924234, EPI_ISL_924236, EPI_ISL_924241, EPI_ISL_924246, EPI_ISL_924254, EPI_ISL_924257, EPI_ISL_924259, EPI_ISL_924260, EPI_ISL_924261, EPI_ISL_924262, EPI_ISL_924264, EPI_ISL_924271, EPI_ISL_924272, EPI_ISL_924275, EPI_ISL_924286, EPI_ISL_924288, EPI_ISL_924294, EPI_ISL_924300, EPI_ISL_924301, EPI_ISL_924309, EPI_ISL_924317, EPI_ISL_924318, EPI_ISL_924320, EPI_ISL_924321, EPI_ISL_924322, EPI_ISL_924327, EPI_ISL_924329, EPI_ISL_924331, EPI_ISL_924336, EPI_ISL_924338, EPI_ISL_924344, EPI_ISL_924346, EPI_ISL_924347, EPI_ISL_924349, EPI_ISL_924362, EPI_ISL_924365, EPI_ISL_924367, EPI_ISL_924370, EPI_ISL_924373, EPI_ISL_924375, EPI_ISL_924378, EPI_ISL_924391, EPI_ISL_924393, EPI_ISL_924395, EPI_ISL_924401, EPI_ISL_924403, EPI_ISL_924404, EPI_ISL_924405, EPI_ISL_924407, EPI_ISL_924411, EPI_ISL_924415, EPI_ISL_924416, EPI_ISL_924417 |                                                                                                                                                                                  |                                                                            |                                                                                                                                                                                                                                                                                                             |
| see above                                                                                                                                                                                                                                                                                                                                                                                                                                                                                                                                                                                                                                                                                                                                                                                                                                                                                                                                                                                                                                                                                                                                                                                                                                                                                                                                                                                                                                                                                                                                                                                                      | Virology Department, Sheffield Teaching Hospitals NHS Foundation Trust/Department of Infection, Immunity and Cardiovascular Disease, The Medical School, University of Sheffield | COVID-19 Genomics UK (COG-UK) Consortium                                   | Thushan de Silva, Matthew Parker, Nikki Smith, Adri Agyal, Rebecca Brown, Luke Green, Rachel Tucker, Paul Parsons, Danielle Groves, Katie Johnson, Laura Carrilero, Alex Keeley, Dave Partridge, Matthew Wyles, Benjamin Lindsey, Mehmet Yavuz, Mohammad Raza, Cariad Evans                                 |
| EPI_ISL_924653, EPI_ISL_924657, EPI_ISL_924672, EPI_ISL_924676, EPI_ISL_924677, EPI_ISL_924688, EPI_ISL_924690, EPI_ISL_924692, EPI_ISL_924694, EPI_ISL_924695, EPI_ISL_924696, EPI_ISL_924697, EPI_ISL_924698, EPI_ISL_924699, EPI_ISL_924701, EPI_ISL_924702, EPI_ISL_924704, EPI_ISL_924705, EPI_ISL_924706, EPI_ISL_924708, EPI_ISL_924713, EPI_ISL_924714, EPI_ISL_924715, EPI_ISL_924717, EPI_ISL_924722                                                                                                                                                                                                                                                                                                                                                                                                                                                                                                                                                                                                                                                                                                                                                                                                                                                                                                                                                                                                                                                                                                                                                                                                 |                                                                                                                                                                                  |                                                                            |                                                                                                                                                                                                                                                                                                             |
| see above                                                                                                                                                                                                                                                                                                                                                                                                                                                                                                                                                                                                                                                                                                                                                                                                                                                                                                                                                                                                                                                                                                                                                                                                                                                                                                                                                                                                                                                                                                                                                                                                      | Bioinformatics and Biostatistics Lab, Advanced Sequencing Facility                                                                                                               | COVID-19 Genomics UK (COG-UK) Consortium                                   | Aengus Stewart,Jerome Nicod,Chelsea Sawyer,Laura Cubitt,Harshil Patel,Margaret Crawford                                                                                                                                                                                                                     |
| EPI_ISL_931589, EPI_ISL_931595, EPI_ISL_931690, EPI_ISL_931726, EPI_ISL_931822, EPI_ISL_931827, EPI_ISL_931874, EPI_ISL_931918, EPI_ISL_931921, EPI_ISL_931937, EPI_ISL_931939, EPI_ISL_931943, EPI_ISL_931953, EPI_ISL_931957, EPI_ISL_931959, EPI_ISL_931979, EPI_ISL_932017, EPI_ISL_932039, EPI_ISL_932046, EPI_ISL_932057, EPI_ISL_932061, EPI_ISL_932068, EPI_ISL_932108, EPI_ISL_932114, EPI_ISL_932157, EPI_ISL_932201, EPI_ISL_932222, EPI_ISL_932231, EPI_ISL_932240, EPI_ISL_932241                                                                                                                                                                                                                                                                                                                                                                                                                                                                                                                                                                                                                                                                                                                                                                                                                                                                                                                                                                                                                                                                                                                 |                                                                                                                                                                                  |                                                                            |                                                                                                                                                                                                                                                                                                             |
| see above                                                                                                                                                                                                                                                                                                                                                                                                                                                                                                                                                                                                                                                                                                                                                                                                                                                                                                                                                                                                                                                                                                                                                                                                                                                                                                                                                                                                                                                                                                                                                                                                      | Lighthouse Lab in Alderley Park                                                                                                                                                  | Wellcome Sanger Institute for the COVID-19 Genomics UK (COG-UK) Consortium | Jacquelyn Wynn, Mairead Hyland, The Lighthouse Lab in Alderley Park and Alex Alderton, Roberto Amato, Sonia Goncalves, Ewan Harrison, David K. Jackson, Ian Johnston, Dominic Kwiatkowski, Cordelia Langford, John Sillitoe on behalf of the Wellcome Sanger Institute COVID-19 Surveillance Team           |
| EPI_ISL_932251, EPI_ISL_932252                                                                                                                                                                                                                                                                                                                                                                                                                                                                                                                                                                                                                                                                                                                                                                                                                                                                                                                                                                                                                                                                                                                                                                                                                                                                                                                                                                                                                                                                                                                                                                                 | Lighthouse Lab in Glasgow                                                                                                                                                        | Wellcome Sanger Institute for the COVID-19 Genomics UK (COG-UK) Consortium | Harper VanSteenhouse, Yumi Kasai, David Gray, Carol Clugston, Anna Dominiczak and Alex Alderton, Roberto Amato, Sonia Goncalves, Ewan Harrison, David K. Jackson, Ian Johnston, Dominic Kwiatkowski, Cordelia Langford, John Sillitoe on behalf of the Wellcome Sanger Institute COVID-19 Surveillance Team |
| EPI_ISL_932254                                                                                                                                                                                                                                                                                                                                                                                                                                                                                                                                                                                                                                                                                                                                                                                                                                                                                                                                                                                                                                                                                                                                                                                                                                                                                                                                                                                                                                                                                                                                                                                                 | Lighthouse Lab in Alderley Park                                                                                                                                                  | Wellcome Sanger Institute for the COVID-19 Genomics UK (COG-UK) Consortium | Jacquelyn Wynn, Mairead Hyland, The Lighthouse Lab in Alderley Park and Alex Alderton, Roberto Amato, Sonia Goncalves, Ewan Harrison, David K. Jackson, Ian Johnston, Dominic Kwiatkowski, Cordelia Langford, John Sillitoe on behalf of the Wellcome Sanger Institute COVID-19 Surveillance Team           |
| EPI_ISL_932255, EPI_ISL_932256                                                                                                                                                                                                                                                                                                                                                                                                                                                                                                                                                                                                                                                                                                                                                                                                                                                                                                                                                                                                                                                                                                                                                                                                                                                                                                                                                                                                                                                                                                                                                                                 | Lighthouse Lab in Glasgow                                                                                                                                                        | Wellcome Sanger Institute for the COVID-19 Genomics UK (COG-UK) Consortium | Harper VanSteenhouse, Yumi Kasai, David Gray, Carol Clugston, Anna Dominiczak and Alex Alderton, Roberto Amato, Sonia Goncalves, Ewan Harrison, David K. Jackson, Ian Johnston, Dominic Kwiatkowski, Cordelia Langford, John Sillitoe on behalf of the Wellcome Sanger Institute COVID-19 Surveillance Team |
| EPI_ISL_932258, EPI_ISL_932259                                                                                                                                                                                                                                                                                                                                                                                                                                                                                                                                                                                                                                                                                                                                                                                                                                                                                                                                                                                                                                                                                                                                                                                                                                                                                                                                                                                                                                                                                                                                                                                 | Lighthouse Lab in Milton Keynes                                                                                                                                                  | Wellcome Sanger Institute for the COVID-19 Genomics UK (COG-UK) Consortium | The Lighthouse Lab in Milton Keynes and Alex Alderton, Roberto Amato, Sonia Goncalves, Ewan Harrison, David K. Jackson, Ian Johnston, Dominic Kwiatkowski, Cordelia Langford, John Sillitoe on behalf of the Wellcome Sanger Institute COVID-19 Surveillance Team                                           |
| EPI_ISL_932261, EPI_ISL_932264                                                                                                                                                                                                                                                                                                                                                                                                                                                                                                                                                                                                                                                                                                                                                                                                                                                                                                                                                                                                                                                                                                                                                                                                                                                                                                                                                                                                                                                                                                                                                                                 | Lighthouse Lab in Alderley Park                                                                                                                                                  | Wellcome Sanger Institute for the COVID-19 Genomics UK (COG-UK) Consortium | Jacquelyn Wynn, Mairead Hyland, The Lighthouse Lab in Alderley Park and Alex Alderton, Roberto Amato, Sonia Goncalves, Ewan Harrison, David K. Jackson, Ian Johnston, Dominic Kwiatkowski, Cordelia Langford, John Sillitoe on behalf of the Wellcome Sanger Institute COVID-19 Surveillance Team           |
| EPI_ISL_932265, EPI_ISL_932266, EPI_ISL_932267                                                                                                                                                                                                                                                                                                                                                                                                                                                                                                                                                                                                                                                                                                                                                                                                                                                                                                                                                                                                                                                                                                                                                                                                                                                                                                                                                                                                                                                                                                                                                                 | Lighthouse Lab in Glasgow                                                                                                                                                        | Wellcome Sanger Institute for the COVID-19 Genomics UK (COG-UK) Consortium | Harper VanSteenhouse, Yumi Kasai, David Gray, Carol Clugston, Anna Dominiczak and Alex Alderton, Roberto Amato, Sonia Goncalves, Ewan Harrison, David K. Jackson, Ian Johnston, Dominic Kwiatkowski, Cordelia Langford, John Sillitoe on behalf of the Wellcome Sanger Institute COVID-19 Surveillance Team |
| EPI_ISL_932268                                                                                                                                                                                                                                                                                                                                                                                                                                                                                                                                                                                                                                                                                                                                                                                                                                                                                                                                                                                                                                                                                                                                                                                                                                                                                                                                                                                                                                                                                                                                                                                                 | Lighthouse Lab in Alderley Park                                                                                                                                                  | Wellcome Sanger Institute for the COVID-19 Genomics UK (COG-UK) Consortium | Jacquelyn Wynn, Mairead Hyland, The Lighthouse Lab in Alderley Park and Alex Alderton, Roberto Amato, Sonia Goncalves, Ewan Harrison, David K. Jackson, Ian Johnston, Dominic Kwiatkowski, Cordelia Langford, John Sillitoe on behalf of the Wellcome Sanger Institute COVID-19 Surveillance Team           |
| EPI_ISL_932269, EPI_ISL_932270, EPI_ISL_932271, EPI_ISL_932272                                                                                                                                                                                                                                                                                                                                                                                                                                                                                                                                                                                                                                                                                                                                                                                                                                                                                                                                                                                                                                                                                                                                                                                                                                                                                                                                                                                                                                                                                                                                                 | Lighthouse Lab in Glasgow                                                                                                                                                        | Wellcome Sanger Institute for the COVID-19 Genomics UK (COG-UK) Consortium | Harper VanSteenhouse, Yumi Kasai, David Gray, Carol Clugston, Anna Dominiczak and Alex Alderton, Roberto Amato, Sonia Goncalves, Ewan Harrison, David K. Jackson, Ian Johnston, Dominic Kwiatkowski, Cordelia Langford, John Sillitoe on behalf of the Wellcome Sanger Institute COVID-19 Surveillance Team |
| EPI_ISL_932273, EPI_ISL_932274                                                                                                                                                                                                                                                                                                                                                                                                                                                                                                                                                                                                                                                                                                                                                                                                                                                                                                                                                                                                                                                                                                                                                                                                                                                                                                                                                                                                                                                                                                                                                                                 | Lighthouse Lab in Alderley Park                                                                                                                                                  | Wellcome Sanger Institute for the COVID-19 Genomics UK (COG-UK) Consortium | Jacquelyn Wynn, Mairead Hyland, The Lighthouse Lab in Alderley Park and Alex Alderton, Roberto Amato, Sonia Goncalves, Ewan Harrison, David K. Jackson, Ian Johnston, Dominic Kwiatkowski, Cordelia Langford, John Sillitoe on behalf of the Wellcome Sanger Institute COVID-19 Surveillance Team           |
| EPI_ISL_932275, EPI_ISL_932277, EPI_ISL_932279, EPI_ISL_932280, EPI_ISL_932281, EPI_ISL_932282                                                                                                                                                                                                                                                                                                                                                                                                                                                                                                                                                                                                                                                                                                                                                                                                                                                                                                                                                                                                                                                                                                                                                                                                                                                                                                                                                                                                                                                                                                                 | Lighthouse Lab in Glasgow                                                                                                                                                        | Wellcome Sanger Institute for the COVID-19 Genomics UK (COG-UK) Consortium | Harper VanSteenhouse, Yumi Kasai, David Gray, Carol Clugston, Anna Dominiczak and Alex Alderton, Roberto Amato, Sonia Goncalves, Ewan Harrison, David K. Jackson, Ian Johnston, Dominic Kwiatkowski, Cordelia Langford, John Sillitoe on behalf of the Wellcome Sanger Institute COVID-19 Surveillance Team |
| EPI_ISL_932284, EPI_ISL_932285                                                                                                                                                                                                                                                                                                                                                                                                                                                                                                                                                                                                                                                                                                                                                                                                                                                                                                                                                                                                                                                                                                                                                                                                                                                                                                                                                                                                                                                                                                                                                                                 | Lighthouse Lab in Alderley Park                                                                                                                                                  | Wellcome Sanger Institute for the COVID-19 Genomics UK (COG-UK) Consortium | Jacquelyn Wynn, Mairead Hyland, The Lighthouse Lab in Alderley Park and Alex Alderton, Roberto Amato, Sonia Goncalves, Ewan Harrison, David K. Jackson, Ian Johnston, Dominic Kwiatkowski, Cordelia Langford, John Sillitoe on behalf of the Wellcome Sanger Institute COVID-19 Surveillance Team           |
| EPI_ISL_932286                                                                                                                                                                                                                                                                                                                                                                                                                                                                                                                                                                                                                                                                                                                                                                                                                                                                                                                                                                                                                                                                                                                                                                                                                                                                                                                                                                                                                                                                                                                                                                                                 | Lighthouse Lab in Glasgow                                                                                                                                                        | Wellcome Sanger Institute for the COVID-19 Genomics UK (COG-UK) Consortium | Harper VanSteenhouse, Y                                                                                                                                                                                                                                                                                     |

[illegible]

[illegible]

[illegible]

[illegible]

[illegible]



[illegible]

[illegible]

[illegible]

[illegible]

[illegible]

[illegible]

|                                                                                                                                                                                                                                                                                                                                                                                                                                                                                                                                                                                                                                                                                                                                                                                                                                                                                                                                                                                                                                                                                                                                                                                                                                                                                                                                                                                                                                                                                                                                                                                                                                                                                                                                                                                                                                                                                                                                                                                                                                                                                                                                                                                                                                                                                                                                                                                                                                                                                                                                                                                                                                                                                                                                                                                                                                                                                                                                                                                                                                                                                                                                                                                                                                                                                                                                                                                                                                                                                                                                                                                                                                                                                                                                                                                                                                                                                                                                                                                                                                                                                                                                                                                                                                                                                                                                                                                                                                                                                                                                                                                                                                                                                                                                                                                                                                                                                                                                                                                                                                                                                                                                                                                                                                                                                                                                                                                                                                                                                                                                                                                                                                                                                                                                                                                                                                                                                                                                                                                                                                                                                                                                                                                                                                                                                                                                                                                                                                                                                                                                                                                                                                                                                                                                                                                                                                                                                                                                                                                                                                                                                                                                                                                                                                                                                                                                                                                                                                                                                                                                                                                                                                                                                                                                                                                                                                                                                                                                                                                                                                                                                                                                                                                                                                                                                                                                                                                                                                                                                                                                                                                                                                                                                                                                                                                                                                                                                                                                                                                                                                                                                                                                                                                                                                                                                                                                                                                                                                                                                                                                                                                                                                                                                                                                                                                                                                                                                                                                                                                                                                                                                                                                                                                                                                                                                                                                                                                                                                                                                                                                                                                                                                                                                                                                                                                                                                                                                                                                                                                                                                                                                                                                                                                                                                                                                                                                                                                                                                                                                                                                                                                                                                                                                                                                                                                                                                                                                                                                                                                                                                                                                                                                                                                                                                                                                                                                                                                                                                                                                                                                                                                                                                                                                                                                                                                                                                                                                                                                                                                                                                                                                                                                                                                                                                                                                                                                                                                                                                                                                                                                                                                                                                                                                                                                                                                              |                                 |                                                                            |                                                                                                                                                                                                                                                                                                   |
|----------------------------------------------------------------------------------------------------------------------------------------------------------------------------------------------------------------------------------------------------------------------------------------------------------------------------------------------------------------------------------------------------------------------------------------------------------------------------------------------------------------------------------------------------------------------------------------------------------------------------------------------------------------------------------------------------------------------------------------------------------------------------------------------------------------------------------------------------------------------------------------------------------------------------------------------------------------------------------------------------------------------------------------------------------------------------------------------------------------------------------------------------------------------------------------------------------------------------------------------------------------------------------------------------------------------------------------------------------------------------------------------------------------------------------------------------------------------------------------------------------------------------------------------------------------------------------------------------------------------------------------------------------------------------------------------------------------------------------------------------------------------------------------------------------------------------------------------------------------------------------------------------------------------------------------------------------------------------------------------------------------------------------------------------------------------------------------------------------------------------------------------------------------------------------------------------------------------------------------------------------------------------------------------------------------------------------------------------------------------------------------------------------------------------------------------------------------------------------------------------------------------------------------------------------------------------------------------------------------------------------------------------------------------------------------------------------------------------------------------------------------------------------------------------------------------------------------------------------------------------------------------------------------------------------------------------------------------------------------------------------------------------------------------------------------------------------------------------------------------------------------------------------------------------------------------------------------------------------------------------------------------------------------------------------------------------------------------------------------------------------------------------------------------------------------------------------------------------------------------------------------------------------------------------------------------------------------------------------------------------------------------------------------------------------------------------------------------------------------------------------------------------------------------------------------------------------------------------------------------------------------------------------------------------------------------------------------------------------------------------------------------------------------------------------------------------------------------------------------------------------------------------------------------------------------------------------------------------------------------------------------------------------------------------------------------------------------------------------------------------------------------------------------------------------------------------------------------------------------------------------------------------------------------------------------------------------------------------------------------------------------------------------------------------------------------------------------------------------------------------------------------------------------------------------------------------------------------------------------------------------------------------------------------------------------------------------------------------------------------------------------------------------------------------------------------------------------------------------------------------------------------------------------------------------------------------------------------------------------------------------------------------------------------------------------------------------------------------------------------------------------------------------------------------------------------------------------------------------------------------------------------------------------------------------------------------------------------------------------------------------------------------------------------------------------------------------------------------------------------------------------------------------------------------------------------------------------------------------------------------------------------------------------------------------------------------------------------------------------------------------------------------------------------------------------------------------------------------------------------------------------------------------------------------------------------------------------------------------------------------------------------------------------------------------------------------------------------------------------------------------------------------------------------------------------------------------------------------------------------------------------------------------------------------------------------------------------------------------------------------------------------------------------------------------------------------------------------------------------------------------------------------------------------------------------------------------------------------------------------------------------------------------------------------------------------------------------------------------------------------------------------------------------------------------------------------------------------------------------------------------------------------------------------------------------------------------------------------------------------------------------------------------------------------------------------------------------------------------------------------------------------------------------------------------------------------------------------------------------------------------------------------------------------------------------------------------------------------------------------------------------------------------------------------------------------------------------------------------------------------------------------------------------------------------------------------------------------------------------------------------------------------------------------------------------------------------------------------------------------------------------------------------------------------------------------------------------------------------------------------------------------------------------------------------------------------------------------------------------------------------------------------------------------------------------------------------------------------------------------------------------------------------------------------------------------------------------------------------------------------------------------------------------------------------------------------------------------------------------------------------------------------------------------------------------------------------------------------------------------------------------------------------------------------------------------------------------------------------------------------------------------------------------------------------------------------------------------------------------------------------------------------------------------------------------------------------------------------------------------------------------------------------------------------------------------------------------------------------------------------------------------------------------------------------------------------------------------------------------------------------------------------------------------------------------------------------------------------------------------------------------------------------------------------------------------------------------------------------------------------------------------------------------------------------------------------------------------------------------------------------------------------------------------------------------------------------------------------------------------------------------------------------------------------------------------------------------------------------------------------------------------------------------------------------------------------------------------------------------------------------------------------------------------------------------------------------------------------------------------------------------------------------------------------------------------------------------------------------------------------------------------------------------------------------------------------------------------------------------------------------------------------------------------------------------------------------------------------------------------------------------------------------------------------------------------------------------------------------------------------------------------------------------------------------------------------------------------------------------------------------------------------------------------------------------------------------------------------------------------------------------------------------------------------------------------------------------------------------------------------------------------------------------------------------------------------------------------------------------------------------------------------------------------------------------------------------------------------------------------------------------------------------------------------------------------------------------------------------------------------------------------------------------------------------------------------------------------------------------------------------------------------------------------------------------------------------------------------------------------------------------------------------------------------------------------------------------------------------------------------------------------------------------------------------------------------------------------------------------------------------------------------------------------------------------------------------------------------------------------------------------------------------------------------------------------------------------------------------------------------------------------------------------------------------------------------------------------------------------------------------------------------------------------------------------------------------------------------------------------------------------------------------------------------------------------------------------------------------------------------------------------------------------------------------------------------------------------------------------------------------------------------------------------------------------------------------------------------------------------------------------------------------------------------------------------------------------------------------------------------------------------------------------------------------------------------------------------------------------------------------------------------------------------------------------------------------------------------------------------------------------------------------------------------------------------------------------------------------------------------------------------------------------------------------------------------------------------------------------------------------------------------------------------------------------------------------------------------------------------------------------------------------------------------------------------------------------------------------------------------------------------------------------------|---------------------------------|----------------------------------------------------------------------------|---------------------------------------------------------------------------------------------------------------------------------------------------------------------------------------------------------------------------------------------------------------------------------------------------|
| EPI_ISL_938496, EPI_ISL_938497, EPI_ISL_938498, EPI_ISL_938499, EPI_ISL_938500, EPI_ISL_938502, EPI_ISL_938503, EPI_ISL_938504, EPI_ISL_938505, EPI_ISL_938506, EPI_ISL_938507, EPI_ISL_938510, EPI_ISL_938511, EPI_ISL_938512, EPI_ISL_938513, EPI_ISL_938514, EPI_ISL_938515, EPI_ISL_938516, EPI_ISL_938517, EPI_ISL_938518, EPI_ISL_938519, EPI_ISL_938520, EPI_ISL_938521, EPI_ISL_938522, EPI_ISL_938523, EPI_ISL_938524, EPI_ISL_938525, EPI_ISL_938526, EPI_ISL_938527, EPI_ISL_938528, EPI_ISL_938529, EPI_ISL_938530, EPI_ISL_938531, EPI_ISL_938532, EPI_ISL_938533, EPI_ISL_938534, EPI_ISL_938535, EPI_ISL_938536, EPI_ISL_938537, EPI_ISL_938538, EPI_ISL_938539, EPI_ISL_938540, EPI_ISL_938541, EPI_ISL_938542, EPI_ISL_938543, EPI_ISL_938544, EPI_ISL_938545, EPI_ISL_938546, EPI_ISL_938547, EPI_ISL_938549, EPI_ISL_938550, EPI_ISL_938551, EPI_ISL_938552, EPI_ISL_938553, EPI_ISL_938554, EPI_ISL_938555, EPI_ISL_938556, EPI_ISL_938557, EPI_ISL_938558, EPI_ISL_938559, EPI_ISL_938560, EPI_ISL_938561, EPI_ISL_938562, EPI_ISL_938564, EPI_ISL_938565, EPI_ISL_938566, EPI_ISL_938567, EPI_ISL_938568, EPI_ISL_938569, EPI_ISL_938570, EPI_ISL_938571, EPI_ISL_938572, EPI_ISL_938573, EPI_ISL_938575, EPI_ISL_938576, EPI_ISL_938577, EPI_ISL_938578                                                                                                                                                                                                                                                                                                                                                                                                                                                                                                                                                                                                                                                                                                                                                                                                                                                                                                                                                                                                                                                                                                                                                                                                                                                                                                                                                                                                                                                                                                                                                                                                                                                                                                                                                                                                                                                                                                                                                                                                                                                                                                                                                                                                                                                                                                                                                                                                                                                                                                                                                                                                                                                                                                                                                                                                                                                                                                                                                                                                                                                                                                                                                                                                                                                                                                                                                                                                                                                                                                                                                                                                                                                                                                                                                                                                                                                                                                                                                                                                                                                                                                                                                                                                                                                                                                                                                                                                                                                                                                                                                                                                                                                                                                                                                                                                                                                                                                                                                                                                                                                                                                                                                                                                                                                                                                                                                                                                                                                                                                                                                                                                                                                                                                                                                                                                                                                                                                                                                                                                                                                                                                                                                                                                                                                                                                                                                                                                                                                                                                                                                                                                                                                                                                                                                                                                                                                                                                                                                                                                                                                                                                                                                                                                                                                                                                                                                                                                                                                                                                                                                                                                                                                                                                                                                                                                                                                                                                                                                                                                                                                                                                                                                                                                                                                                                                                                                                                                                                                                                                                                                                                                                                                                                                                                                                                                                                                                                                                                                                                                                                                                                                                                                                                                                                                                                                                                                                                                                                                                                                                                                                                                                                                                                                                                                                                                                                                                                                                                                                                                                                                                                                                                                                                                                                                                                                                                                                                                                                                                                                                                                                                                                                                                                                                                                                                                                                                                                                                                                                                                                                                                                                                                                                                                                                                                                                                                                                                                                                                                                                                                                                                                                                                                                                                                                                                                                                                                                                                                                                                                                                                                                                                                                                                                                                                                                                                                                                                                                                                                                                               |                                 |                                                                            |                                                                                                                                                                                                                                                                                                   |
| see above                                                                                                                                                                                                                                                                                                                                                                                                                                                                                                                                                                                                                                                                                                                                                                                                                                                                                                                                                                                                                                                                                                                                                                                                                                                                                                                                                                                                                                                                                                                                                                                                                                                                                                                                                                                                                                                                                                                                                                                                                                                                                                                                                                                                                                                                                                                                                                                                                                                                                                                                                                                                                                                                                                                                                                                                                                                                                                                                                                                                                                                                                                                                                                                                                                                                                                                                                                                                                                                                                                                                                                                                                                                                                                                                                                                                                                                                                                                                                                                                                                                                                                                                                                                                                                                                                                                                                                                                                                                                                                                                                                                                                                                                                                                                                                                                                                                                                                                                                                                                                                                                                                                                                                                                                                                                                                                                                                                                                                                                                                                                                                                                                                                                                                                                                                                                                                                                                                                                                                                                                                                                                                                                                                                                                                                                                                                                                                                                                                                                                                                                                                                                                                                                                                                                                                                                                                                                                                                                                                                                                                                                                                                                                                                                                                                                                                                                                                                                                                                                                                                                                                                                                                                                                                                                                                                                                                                                                                                                                                                                                                                                                                                                                                                                                                                                                                                                                                                                                                                                                                                                                                                                                                                                                                                                                                                                                                                                                                                                                                                                                                                                                                                                                                                                                                                                                                                                                                                                                                                                                                                                                                                                                                                                                                                                                                                                                                                                                                                                                                                                                                                                                                                                                                                                                                                                                                                                                                                                                                                                                                                                                                                                                                                                                                                                                                                                                                                                                                                                                                                                                                                                                                                                                                                                                                                                                                                                                                                                                                                                                                                                                                                                                                                                                                                                                                                                                                                                                                                                                                                                                                                                                                                                                                                                                                                                                                                                                                                                                                                                                                                                                                                                                                                                                                                                                                                                                                                                                                                                                                                                                                                                                                                                                                                                                                                                                                                                                                                                                                                                                                                                                                                                                                                                                                                                                                                    | Lighthouse Lab in Cambridge     | Wellcome Sanger Institute for the COVID-19 Genomics UK (COG-UK) Consortium | Rob Howes, The Lighthouse Lab in Cambridge and Alex Alderton, Roberto Amato, Sonia Goncalves, Ewan Harrison, David K. Jackson, Ian Johnston, Dominic Kwiatkowski, Cordelia Langford, John Sillitoe on behalf of the Wellcome Sanger Institute COVID-19 Surveillance Team                          |
| EPI_ISL_938581, EPI_ISL_938587, EPI_ISL_938592, EPI_ISL_938596, EPI_ISL_938599, EPI_ISL_938602, EPI_ISL_938603, EPI_ISL_938607, EPI_ISL_938610, EPI_ISL_938612, EPI_ISL_938613, EPI_ISL_938614, EPI_ISL_938619, EPI_ISL_938630, EPI_ISL_938632, EPI_ISL_938633, EPI_ISL_938636, EPI_ISL_938637, EPI_ISL_938643, EPI_ISL_938645, EPI_ISL_938648, EPI_ISL_938650, EPI_ISL_938652, EPI_ISL_938657, EPI_ISL_938662, EPI_ISL_938666, EPI_ISL_938667, EPI_ISL_938676, EPI_ISL_938684, EPI_ISL_938694, EPI_ISL_938700, EPI_ISL_938701, EPI_ISL_938702, EPI_ISL_938729, EPI_ISL_938731, EPI_ISL_938732, EPI_ISL_938733, EPI_ISL_938737, EPI_ISL_938741, EPI_ISL_938743, EPI_ISL_938744, EPI_ISL_938746, EPI_ISL_938747, EPI_ISL_938750, EPI_ISL_938751, EPI_ISL_938752, EPI_ISL_938756, EPI_ISL_938757, EPI_ISL_938758, EPI_ISL_938762, EPI_ISL_938764, EPI_ISL_938769, EPI_ISL_938771, EPI_ISL_938772, EPI_ISL_938773, EPI_ISL_938783, EPI_ISL_938785, EPI_ISL_938787, EPI_ISL_938794, EPI_ISL_938796, EPI_ISL_938797, EPI_ISL_938800, EPI_ISL_938801, EPI_ISL_938803, EPI_ISL_938804, EPI_ISL_938806, EPI_ISL_938807, EPI_ISL_938810, EPI_ISL_938811, EPI_ISL_938815, EPI_ISL_938829, EPI_ISL_938837, EPI_ISL_938840, EPI_ISL_938845, EPI_ISL_938846, EPI_ISL_938854, EPI_ISL_938865, EPI_ISL_938875, EPI_ISL_938876, EPI_ISL_938882, EPI_ISL_938885, EPI_ISL_938886, EPI_ISL_938900, EPI_ISL_938901, EPI_ISL_938903, EPI_ISL_938908, EPI_ISL_938911, EPI_ISL_938913, EPI_ISL_938916, EPI_ISL_938921, EPI_ISL_938931, EPI_ISL_938933, EPI_ISL_938934                                                                                                                                                                                                                                                                                                                                                                                                                                                                                                                                                                                                                                                                                                                                                                                                                                                                                                                                                                                                                                                                                                                                                                                                                                                                                                                                                                                                                                                                                                                                                                                                                                                                                                                                                                                                                                                                                                                                                                                                                                                                                                                                                                                                                                                                                                                                                                                                                                                                                                                                                                                                                                                                                                                                                                                                                                                                                                                                                                                                                                                                                                                                                                                                                                                                                                                                                                                                                                                                                                                                                                                                                                                                                                                                                                                                                                                                                                                                                                                                                                                                                                                                                                                                                                                                                                                                                                                                                                                                                                                                                                                                                                                                                                                                                                                                                                                                                                                                                                                                                                                                                                                                                                                                                                                                                                                                                                                                                                                                                                                                                                                                                                                                                                                                                                                                                                                                                                                                                                                                                                                                                                                                                                                                                                                                                                                                                                                                                                                                                                                                                                                                                                                                                                                                                                                                                                                                                                                                                                                                                                                                                                                                                                                                                                                                                                                                                                                                                                                                                                                                                                                                                                                                                                                                                                                                                                                                                                                                                                                                                                                                                                                                                                                                                                                                                                                                                                                                                                                                                                                                                                                                                                                                                                                                                                                                                                                                                                                                                                                                                                                                                                                                                                                                                                                                                                                                                                                                                                                                                                                                                                                                                                                                                                                                                                                                                                                                                                                                                                                                                                                                                                                                                                                                                                                                                                                                                                                                                                                                                                                                                                                                                                                                                                                                                                                                                                                                                                                                                                                                                                                                                                                                                                                                                                                                                                                                                                                                                                                                                                                                                                                                                                                                                                                                                                                                                                                                                                                                                                                                                                                                                                                                                                                                                                               |                                 |                                                                            |                                                                                                                                                                                                                                                                                                   |
| see above                                                                                                                                                                                                                                                                                                                                                                                                                                                                                                                                                                                                                                                                                                                                                                                                                                                                                                                                                                                                                                                                                                                                                                                                                                                                                                                                                                                                                                                                                                                                                                                                                                                                                                                                                                                                                                                                                                                                                                                                                                                                                                                                                                                                                                                                                                                                                                                                                                                                                                                                                                                                                                                                                                                                                                                                                                                                                                                                                                                                                                                                                                                                                                                                                                                                                                                                                                                                                                                                                                                                                                                                                                                                                                                                                                                                                                                                                                                                                                                                                                                                                                                                                                                                                                                                                                                                                                                                                                                                                                                                                                                                                                                                                                                                                                                                                                                                                                                                                                                                                                                                                                                                                                                                                                                                                                                                                                                                                                                                                                                                                                                                                                                                                                                                                                                                                                                                                                                                                                                                                                                                                                                                                                                                                                                                                                                                                                                                                                                                                                                                                                                                                                                                                                                                                                                                                                                                                                                                                                                                                                                                                                                                                                                                                                                                                                                                                                                                                                                                                                                                                                                                                                                                                                                                                                                                                                                                                                                                                                                                                                                                                                                                                                                                                                                                                                                                                                                                                                                                                                                                                                                                                                                                                                                                                                                                                                                                                                                                                                                                                                                                                                                                                                                                                                                                                                                                                                                                                                                                                                                                                                                                                                                                                                                                                                                                                                                                                                                                                                                                                                                                                                                                                                                                                                                                                                                                                                                                                                                                                                                                                                                                                                                                                                                                                                                                                                                                                                                                                                                                                                                                                                                                                                                                                                                                                                                                                                                                                                                                                                                                                                                                                                                                                                                                                                                                                                                                                                                                                                                                                                                                                                                                                                                                                                                                                                                                                                                                                                                                                                                                                                                                                                                                                                                                                                                                                                                                                                                                                                                                                                                                                                                                                                                                                                                                                                                                                                                                                                                                                                                                                                                                                                                                                                                                                                                    | Lighthouse Lab in Milton Keynes | Wellcome Sanger Institute for the COVID-19 Genomics UK (COG-UK) Consortium | The Lighthouse Lab in Milton Keynes and Alex Alderton, Roberto Amato, Sonia Goncalves, Ewan Harrison, David K. Jackson, Ian Johnston, Dominic Kwiatkowski, Cordelia Langford, John Sillitoe on behalf of the Wellcome Sanger Institute COVID-19 Surveillance Team                                 |
| EPI_ISL_938940                                                                                                                                                                                                                                                                                                                                                                                                                                                                                                                                                                                                                                                                                                                                                                                                                                                                                                                                                                                                                                                                                                                                                                                                                                                                                                                                                                                                                                                                                                                                                                                                                                                                                                                                                                                                                                                                                                                                                                                                                                                                                                                                                                                                                                                                                                                                                                                                                                                                                                                                                                                                                                                                                                                                                                                                                                                                                                                                                                                                                                                                                                                                                                                                                                                                                                                                                                                                                                                                                                                                                                                                                                                                                                                                                                                                                                                                                                                                                                                                                                                                                                                                                                                                                                                                                                                                                                                                                                                                                                                                                                                                                                                                                                                                                                                                                                                                                                                                                                                                                                                                                                                                                                                                                                                                                                                                                                                                                                                                                                                                                                                                                                                                                                                                                                                                                                                                                                                                                                                                                                                                                                                                                                                                                                                                                                                                                                                                                                                                                                                                                                                                                                                                                                                                                                                                                                                                                                                                                                                                                                                                                                                                                                                                                                                                                                                                                                                                                                                                                                                                                                                                                                                                                                                                                                                                                                                                                                                                                                                                                                                                                                                                                                                                                                                                                                                                                                                                                                                                                                                                                                                                                                                                                                                                                                                                                                                                                                                                                                                                                                                                                                                                                                                                                                                                                                                                                                                                                                                                                                                                                                                                                                                                                                                                                                                                                                                                                                                                                                                                                                                                                                                                                                                                                                                                                                                                                                                                                                                                                                                                                                                                                                                                                                                                                                                                                                                                                                                                                                                                                                                                                                                                                                                                                                                                                                                                                                                                                                                                                                                                                                                                                                                                                                                                                                                                                                                                                                                                                                                                                                                                                                                                                                                                                                                                                                                                                                                                                                                                                                                                                                                                                                                                                                                                                                                                                                                                                                                                                                                                                                                                                                                                                                                                                                                                                                                                                                                                                                                                                                                                                                                                                                                                                                                                                                               | Lighthouse Lab in Alderley Park | Wellcome Sanger Institute for the COVID-19 Genomics UK (COG-UK) Consortium | Jacquelyn Wynn, Mairead Hyland, The Lighthouse Lab in Alderley Park and Alex Alderton, Roberto Amato, Sonia Goncalves, Ewan Harrison, David K. Jackson, Ian Johnston, Dominic Kwiatkowski, Cordelia Langford, John Sillitoe on behalf of the Wellcome Sanger Institute COVID-19 Surveillance Team |
| EPI_ISL_938944, EPI_ISL_938945, EPI_ISL_938946, EPI_ISL_938947, EPI_ISL_938948, EPI_ISL_938949, EPI_ISL_938950, EPI_ISL_938952, EPI_ISL_938953, EPI_ISL_938955, EPI_ISL_938956, EPI_ISL_938957, EPI_ISL_938958, EPI_ISL_938959, EPI_ISL_938960, EPI_ISL_938961, EPI_ISL_938962, EPI_ISL_938963, EPI_ISL_938964, EPI_ISL_938965, EPI_ISL_938966, EPI_ISL_938967, EPI_ISL_938968, EPI_ISL_938969, EPI_ISL_938970, EPI_ISL_938971, EPI_ISL_938972, EPI_ISL_938973, EPI_ISL_938974, EPI_ISL_938975, EPI_ISL_938976, EPI_ISL_938977, EPI_ISL_938978, EPI_ISL_938979, EPI_ISL_938980, EPI_ISL_938981, EPI_ISL_938982, EPI_ISL_938983, EPI_ISL_938984, EPI_ISL_938985, EPI_ISL_938986, EPI_ISL_938987, EPI_ISL_938988, EPI_ISL_938989, EPI_ISL_938990, EPI_ISL_938991, EPI_ISL_938992, EPI_ISL_938993, EPI_ISL_938994, EPI_ISL_938995, EPI_ISL_938996, EPI_ISL_938997, EPI_ISL_938998, EPI_ISL_938999, EPI_ISL_939000, EPI_ISL_939001, EPI_ISL_939002, EPI_ISL_939003, EPI_ISL_939004, EPI_ISL_939005, EPI_ISL_939006, EPI_ISL_939007, EPI_ISL_939008, EPI_ISL_939009, EPI_ISL_939010, EPI_ISL_939011, EPI_ISL_939012, EPI_ISL_939013, EPI_ISL_939014, EPI_ISL_939015, EPI_ISL_939016, EPI_ISL_939017, EPI_ISL_939018, EPI_ISL_939019, EPI_ISL_939020, EPI_ISL_939021, EPI_ISL_939022, EPI_ISL_939023, EPI_ISL_939024, EPI_ISL_939025, EPI_ISL_939026, EPI_ISL_939027, EPI_ISL_939028, EPI_ISL_939029, EPI_ISL_939030, EPI_ISL_939031, EPI_ISL_939032, EPI_ISL_939033, EPI_ISL_939034, EPI_ISL_939035, EPI_ISL_939036, EPI_ISL_939037, EPI_ISL_939038, EPI_ISL_939039, EPI_ISL_939040, EPI_ISL_939041, EPI_ISL_939042, EPI_ISL_939043, EPI_ISL_939044, EPI_ISL_939045, EPI_ISL_939046, EPI_ISL_939047, EPI_ISL_939048, EPI_ISL_939049, EPI_ISL_939050, EPI_ISL_939051, EPI_ISL_939052, EPI_ISL_939053, EPI_ISL_939054, EPI_ISL_939055, EPI_ISL_939056, EPI_ISL_939057, EPI_ISL_939058, EPI_ISL_939059, EPI_ISL_939060, EPI_ISL_939061, EPI_ISL_939062, EPI_ISL_939063, EPI_ISL_939064, EPI_ISL_939065, EPI_ISL_939066, EPI_ISL_939067, EPI_ISL_939068, EPI_ISL_939069, EPI_ISL_939070, EPI_ISL_939071, EPI_ISL_939072, EPI_ISL_939073, EPI_ISL_939074, EPI_ISL_939075, EPI_ISL_939076, EPI_ISL_939077, EPI_ISL_939078, EPI_ISL_939079, EPI_ISL_939080, EPI_ISL_939081, EPI_ISL_939082, EPI_ISL_939083, EPI_ISL_939084, EPI_ISL_939085, EPI_ISL_939086, EPI_ISL_939087, EPI_ISL_939088, EPI_ISL_939089, EPI_ISL_939090, EPI_ISL_939091, EPI_ISL_939092, EPI_ISL_939093, EPI_ISL_939094, EPI_ISL_939095, EPI_ISL_939096, EPI_ISL_939097, EPI_ISL_939098, EPI_ISL_939099, EPI_ISL_939100, EPI_ISL_939101, EPI_ISL_939102, EPI_ISL_939103, EPI_ISL_939104, EPI_ISL_939105, EPI_ISL_939106, EPI_ISL_939107, EPI_ISL_939108, EPI_ISL_939109, EPI_ISL_939110, EPI_ISL_939111, EPI_ISL_939112, EPI_ISL_939113, EPI_ISL_939114, EPI_ISL_939115, EPI_ISL_939116, EPI_ISL_939117, EPI_ISL_939118, EPI_ISL_939119, EPI_ISL_939120, EPI_ISL_939121, EPI_ISL_939122, EPI_ISL_939123, EPI_ISL_939124, EPI_ISL_939125, EPI_ISL_939126, EPI_ISL_939127, EPI_ISL_939128, EPI_ISL_939129, EPI_ISL_939130, EPI_ISL_939131, EPI_ISL_939132, EPI_ISL_939133, EPI_ISL_939134, EPI_ISL_939135, EPI_ISL_939136, EPI_ISL_939137, EPI_ISL_939138, EPI_ISL_939139, EPI_ISL_939140, EPI_ISL_939141, EPI_ISL_939142, EPI_ISL_939143, EPI_ISL_939144, EPI_ISL_939145, EPI_ISL_939146, EPI_ISL_939147, EPI_ISL_939148, EPI_ISL_939149, EPI_ISL_939150, EPI_ISL_939151, EPI_ISL_939152, EPI_ISL_939153, EPI_ISL_939154, EPI_ISL_939155, EPI_ISL_939156, EPI_ISL_939157, EPI_ISL_939158, EPI_ISL_939159, EPI_ISL_939160, EPI_ISL_939161, EPI_ISL_939162, EPI_ISL_939163, EPI_ISL_939164, EPI_ISL_939165, EPI_ISL_939166, EPI_ISL_939167, EPI_ISL_939168, EPI_ISL_939169, EPI_ISL_939170, EPI_ISL_939171, EPI_ISL_939172, EPI_ISL_939173, EPI_ISL_939174, EPI_ISL_939175, EPI_ISL_939176, EPI_ISL_939177, EPI_ISL_939178, EPI_ISL_939179, EPI_ISL_939180, EPI_ISL_939181, EPI_ISL_939182, EPI_ISL_939183, EPI_ISL_939184, EPI_ISL_939185, EPI_ISL_939186, EPI_ISL_939187, EPI_ISL_939188, EPI_ISL_939189, EPI_ISL_939190, EPI_ISL_939191, EPI_ISL_939192, EPI_ISL_939193, EPI_ISL_939194, EPI_ISL_939195, EPI_ISL_939196, EPI_ISL_939197, EPI_ISL_939198, EPI_ISL_939199, EPI_ISL_939200, EPI_ISL_939201, EPI_ISL_939202, EPI_ISL_939203, EPI_ISL_939204, EPI_ISL_939205, EPI_ISL_939206, EPI_ISL_939207, EPI_ISL_939208, EPI_ISL_939209, EPI_ISL_939210, EPI_ISL_939211, EPI_ISL_939212, EPI_ISL_939213, EPI_ISL_939214, EPI_ISL_939215, EPI_ISL_939216, EPI_ISL_939217, EPI_ISL_939218, EPI_ISL_939219, EPI_ISL_939220, EPI_ISL_939221, EPI_ISL_939222, EPI_ISL_939223, EPI_ISL_939224, EPI_ISL_939225, EPI_ISL_939226, EPI_ISL_939227, EPI_ISL_939228, EPI_ISL_939229, EPI_ISL_939230, EPI_ISL_939231, EPI_ISL_939232, EPI_ISL_939233, EPI_ISL_939234, EPI_ISL_939235, EPI_ISL_939236, EPI_ISL_939237, EPI_ISL_939238, EPI_ISL_939239, EPI_ISL_939240, EPI_ISL_939241, EPI_ISL_939242, EPI_ISL_939243, EPI_ISL_939244, EPI_ISL_939245, EPI_ISL_939246, EPI_ISL_939247, EPI_ISL_939248, EPI_ISL_939249, EPI_ISL_939250, EPI_ISL_939251, EPI_ISL_939252, EPI_ISL_939253, EPI_ISL_939254, EPI_ISL_939255, EPI_ISL_939256, EPI_ISL_939257, EPI_ISL_939258, EPI_ISL_939259, EPI_ISL_939260, EPI_ISL_939261, EPI_ISL_939262, EPI_ISL_939263, EPI_ISL_939264, EPI_ISL_939265, EPI_ISL_939266, EPI_ISL_939267, EPI_ISL_939268, EPI_ISL_939269, EPI_ISL_939270, EPI_ISL_939271, EPI_ISL_939272, EPI_ISL_939273, EPI_ISL_939274, EPI_ISL_939275, EPI_ISL_939276, EPI_ISL_939277, EPI_ISL_939278, EPI_ISL_939279, EPI_ISL_939280, EPI_ISL_939281, EPI_ISL_939282, EPI_ISL_939283, EPI_ISL_939284, EPI_ISL_939285, EPI_ISL_939286, EPI_ISL_939287, EPI_ISL_939288, EPI_ISL_939289, EPI_ISL_939290, EPI_ISL_939291, EPI_ISL_939292, EPI_ISL_939293, EPI_ISL_939294, EPI_ISL_939295, EPI_ISL_939296, EPI_ISL_939300, EPI_ISL_939301, EPI_ISL_939302, EPI_ISL_939303, EPI_ISL_939306, EPI_ISL_939307, EPI_ISL_939308, EPI_ISL_939309, EPI_ISL_939310, EPI_ISL_939311, EPI_ISL_939312, EPI_ISL_939313, EPI_ISL_939314, EPI_ISL_939315, EPI_ISL_939316, EPI_ISL_939317, EPI_ISL_939318, EPI_ISL_939319, EPI_ISL_939320, EPI_ISL_939321, EPI_ISL_939322, EPI_ISL_939323, EPI_ISL_939324, EPI_ISL_939325, EPI_ISL_939326, EPI_ISL_939327, EPI_ISL_939328, EPI_ISL_939329, EPI_ISL_939330, EPI_ISL_939331, EPI_ISL_939332, EPI_ISL_939333, EPI_ISL_939334, EPI_ISL_939335, EPI_ISL_939336, EPI_ISL_939337, EPI_ISL_939338, EPI_ISL_939339, EPI_ISL_939340, EPI_ISL_939341, EPI_ISL_939342, EPI_ISL_939343, EPI_ISL_939344, EPI_ISL_939345, EPI_ISL_939346, EPI_ISL_939347, EPI_ISL_939348, EPI_ISL_939349, EPI_ISL_939350, EPI_ISL_939351, EPI_ISL_939352, EPI_ISL_939353, EPI_ISL_939354, EPI_ISL_939355, EPI_ISL_939356, EPI_ISL_939357, EPI_ISL_939358, EPI_ISL_939359, EPI_ISL_939360, EPI_ISL_939361, EPI_ISL_939362, EPI_ISL_939363, EPI_ISL_939364, EPI_ISL_939365, EPI_ISL_939366, EPI_ISL_939367, EPI_ISL_939368, EPI_ISL_939369, EPI_ISL_939370, EPI_ISL_939371, EPI_ISL_939372, EPI_ISL_939373, EPI_ISL_939374, EPI_ISL_939375, EPI_ISL_939376, EPI_ISL_939377, EPI_ISL_939378, EPI_ISL_939379, EPI_ISL_939380, EPI_ISL_939381, EPI_ISL_939382, EPI_ISL_939383, EPI_ISL_939384, EPI_ISL_939385, EPI_ISL_939386, EPI_ISL_939387, EPI_ISL_939388, EPI_ISL_939389, EPI_ISL_939390, EPI_ISL_939391, EPI_ISL_939392, EPI_ISL_939393, EPI_ISL_939394, EPI_ISL_939395, EPI_ISL_939396, EPI_ISL_939397, EPI_ISL_939398, EPI_ISL_939399, EPI_ISL_939400, EPI_ISL_939401, EPI_ISL_939402, EPI_ISL_939403, EPI_ISL_939404, EPI_ISL_939405, EPI_ISL_939406, EPI_ISL_939407, EPI_ISL_939408, EPI_ISL_939409, EPI_ISL_939410, EPI_ISL_939411, EPI_ISL_939412, EPI_ISL_939413, EPI_ISL_939414, EPI_ISL_939415, EPI_ISL_939416, EPI_ISL_939417, EPI_ISL_939418, EPI_ISL_939419, EPI_ISL_939420, EPI_ISL_939421, EPI_ISL_939422, EPI_ISL_939423, EPI_ISL_939424, EPI_ISL_939425, EPI_ISL_939426, EPI_ISL_939427, EPI_ISL_939428, EPI_ISL_939429, EPI_ISL_939430, EPI_ISL_939431, EPI_ISL_939432, EPI_ISL_939433, EPI_ISL_939434, EPI_ISL_939435, EPI_ISL_939436, EPI_ISL_939437, EPI_ISL_939438, EPI_ISL_939439, EPI_ISL_939440, EPI_ISL_939441, EPI_ISL_939442, EPI_ISL_939443, EPI_ISL_939444, EPI_ISL_939445, EPI_ISL_939446, EPI_ISL_939447, EPI_ISL_939448, EPI_ISL_939449, EPI_ISL_939450, EPI_ISL_939451, EPI_ISL_939452, EPI_ISL_939453, EPI_ISL_939454, EPI_ISL_939455, EPI_ISL_939456, EPI_ISL_939457, EPI_ISL_939458, EPI_ISL_939459, EPI_ISL_939460, EPI_ISL_939461, EPI_ISL_939462, EPI_ISL_939463, EPI_ISL_939464, EPI_ISL_939465, EPI_ISL_939466, EPI_ISL_939467, EPI_ISL_939468, EPI_ISL_939469, EPI_ISL_939470, EPI_ISL_939471, EPI_ISL_939472, EPI_ISL_939473, EPI_ISL_939474, EPI_ISL_939475, EPI_ISL_939476, EPI_ISL_939477, EPI_ISL_939478, EPI_ISL_939479, EPI_ISL_939480, EPI_ISL_939481, EPI_ISL_939482, EPI_ISL_939483, EPI_ISL_939484, EPI_ISL_939485, EPI_ISL_939486, EPI_ISL_939487, EPI_ISL_939488, EPI_ISL_939489, EPI_ISL_939490, EPI_ISL_939491, EPI_ISL_939492, EPI_ISL_939493, EPI_ISL_939494, EPI_ISL_939495, EPI_ISL_939496, EPI_ISL_939497, EPI_ISL_939498, EPI_ISL_939499, EPI_ISL_939500, EPI_ISL_939501, EPI_ISL_939502, EPI_ISL_939503, EPI_ISL_939504, EPI_ISL_939505, EPI_ISL_939506, EPI_ISL_939507, EPI_ISL_939508, EPI_ISL_939509, EPI_ISL_939510, EPI_ISL_939511, EPI_ISL_939512, EPI_ISL_939513, EPI_ISL_939514, EPI_ISL_939515, EPI_ISL_939516, EPI_ISL_939517, EPI_ISL_939518, EPI_ISL_939519, EPI_ISL_939520, EPI_ISL_939521, EPI_ISL_939522, EPI_ISL_939523, EPI_ISL_939524, EPI_ISL_939525, EPI_ISL_939526, EPI_ISL_939527, EPI_ISL_939528, EPI_ISL_939529, EPI_ISL_939530, EPI_ISL_939531, EPI_ISL_939532, EPI_ISL_939533, EPI_ISL_939534, EPI_ISL_939535, EPI_ISL_939536, EPI_ISL_939537, EPI_ISL_939538, EPI_ISL_939539, EPI_ISL_939540, EPI_ISL_939541, EPI_ISL_939542, EPI_ISL_939543, EPI_ISL_939544, EPI_ISL_939545, EPI_ISL_939546, EPI_ISL_939547, EPI_ISL_939548, EPI_ISL_939549, EPI_ISL_939550, EPI_ISL_939551, EPI_ISL_939552, EPI_ISL_939553, EPI_ISL_939554, EPI_ISL_939555, EPI_ISL_939556, EPI_ISL_939557, EPI_ISL_939558, EPI_ISL_939559, EPI_ISL_939560, EPI_ISL_939561, EPI_ISL_939562, EPI_ISL_939563, EPI_ISL_939564, EPI_ISL_939565, EPI_ISL_939566, EPI_ISL_939567, EPI_ISL_939568, EPI_ISL_939569, EPI_ISL_939570, EPI_ISL_939571, EPI_ISL_939572, EPI_ISL_939573, EPI_ISL_939574, EPI_ISL_939575, EPI_ISL_939576, EPI_ISL_939577, EPI_ISL_939578, EPI_ISL_939579, EPI_ISL_939580, EPI_ISL_939581, EPI_ISL_939582, EPI_ISL_939583, EPI_ISL_939584, EPI_ISL_939585, EPI_ISL_939586, EPI_ISL_939587, EPI_ISL_939588, EPI_ISL_939589, EPI_ISL_939590, EPI_ISL_939591, EPI_ISL_939592, EPI_ISL_939593, EPI_ISL_939594, EPI_ISL_939595, EPI_ISL_939596, EPI_ISL_939597, EPI_ISL_939598, EPI_ISL_939599, EPI_ISL_939600, EPI_ISL_939601, EPI_ISL_939602, EPI_ISL_939603, EPI_ISL_939604, EPI_ISL_939605, EPI_ISL_939606, EPI_ISL_939607, EPI_ISL_939608, EPI_ISL_939609, EPI_ISL_939610, EPI_ISL_939611, EPI_ISL_939612, EPI_ISL_939613, EPI_ISL_939614, EPI_ISL_939615, EPI_ISL_939616, EPI_ISL_939617, EPI_ISL_939618, EPI_ISL_939619, EPI_ISL_939620, EPI_ISL_939621, EPI_ISL_939622, EPI_ISL_939623, EPI_ISL_939624, EPI_ISL_939625, EPI_ISL_939626, EPI_ISL_939627, EPI_ISL_939628, EPI_ISL_939629, EPI_ISL_939630, EPI_ISL_939631, EPI_ISL_939632, EPI_ISL_939633, EPI_ISL_939634, EPI_ISL_939635, EPI_ISL_939636, EPI_ISL_939637, EPI_ISL_939638, EPI_ISL_939639, EPI_ISL_939640, EPI_ISL_939641, EPI_ISL_939642, EPI_ISL_939643, EPI_ISL_939644, EPI_ISL_939645, EPI_ISL_939646, EPI_ISL_939647, EPI_ISL_939648, EPI_ISL_939649, EPI_ISL_939650, EPI_ISL_939651, EPI_ISL_939652, EPI_ISL_939653, EPI_ISL_939654, EPI_ISL_939655, EPI_ISL_939656, EPI_ISL_939657, EPI_ISL_939658, EPI_ISL_939659, EPI_ISL_939660, EPI_ISL_939661, EPI_ISL_939662, EPI_ISL_939663, EPI_ISL_939664, EPI_ISL_939665, EPI_ISL_939666, EPI_ISL_939667, EPI_ISL_939668, EPI_ISL_939669, EPI_ISL_939670, EPI_ISL_939671, EPI_ISL_939672, EPI_ISL_939673, EPI_ISL_939674, EPI_ISL_939675, EPI_ISL_939676, EPI_ISL_939677, EPI_ISL_939678, EPI_ISL_939679, EPI_ISL_939680, EPI_ISL_939681, EPI_ISL_939682, EPI_ISL_939683, EPI_ISL_939684, EPI_ISL_939685, EPI_ISL_939686, EPI_ISL_939687, EPI_ISL_939688, EPI_ISL_939689, EPI_ISL_939690, EPI_ISL_939691, EPI_ISL_939692, EPI_ISL_939693, EPI_ISL_939694, EPI_ISL_939695, EPI_ISL_939696, EPI_ISL_939697, EPI_ISL_939698, EPI_ISL_939699, EPI_ISL_939700, EPI_ISL_939701, EPI_ISL_939702, EPI_ISL_939703, EPI_ISL_939704, EPI_ISL_939705, EPI_ISL_939706, EPI_ISL_939707, EPI_ISL_939708, EPI_ISL_939709, EPI_ISL_939710, EPI_ISL_939711, EPI_ISL_939712, EPI_ISL_939713, EPI_ISL_939714, EPI_ISL_939715, EPI_ISL_939716, EPI_ISL_939717, EPI_ISL_939718, EPI_ISL_939719, EPI_ISL_939720, EPI_ISL_939721, EPI_ISL_939722, EPI_ISL_939723, EPI_ISL_939724, EPI_ISL_939725, EPI_ISL_939726, EPI_ISL_939727, EPI_ISL_939728, EPI_ISL_939729, EPI_ISL_939730, EPI_ISL_939731, EPI_ISL_939732, EPI_ISL_939733, EPI_ISL_939734, EPI_ISL_939735, EPI_ISL_939736, EPI_ISL_939737, EPI_ISL_939738, EPI_ISL_939739, EPI_ISL_939740, EPI_ISL_939741, EPI_ISL_939742, EPI_ISL_939743, EPI_ISL_939744, EPI_ISL_939745, EPI_ISL_939746, EPI_ISL_939747, EPI_ISL_939748, EPI_ISL_939749, EPI_ISL_939750, EPI_ISL_939751, EPI_ISL_939752, EPI_ISL_939753, EPI_ISL_939754, EPI_ISL_939755, EPI_ISL_939756, EPI_ISL_939757, EPI_ISL_939758, EPI_ISL_939759, EPI_ISL_939760, EPI_ISL_939761, EPI_ISL_939762, EPI_ISL_939763, EPI_ISL_939764, EPI_ISL_939765, EPI_ISL_939766, EPI_ISL_939767, EPI_ISL_939768, EPI_ISL_939769, EPI_ISL_939770, EPI_ISL_939771, EPI_ISL_939772, EPI_ISL_939773, EPI_ISL_939774, EPI_ISL_939775, EPI_ISL_939776, EPI_ISL_939777, EPI_ISL_9397 |                                 |                                                                            |                                                                                                                                                                                                                                                                                                   |

[illegible]



|                                                                                                                                                                                                                                                                                                                                                                                                                                                                                                                                                                                                                                                                                                                                                                                                                                                                                                                                                                                                                                                                                                                                                                                                                                                                                                                                                                                                                                                                                                                                                                                                                                                                                                                                                                                                                                                                                                                                                                                                                                                                                                                                                                                                                                                                                                                |                                                                                                                                                                                                                     |                                                                                                                                                                                                                                                                                                                                |                                                                                                                                                                                                                                                                                                                                                                                                                                                                                                                                                                                                                                                                                           |
|----------------------------------------------------------------------------------------------------------------------------------------------------------------------------------------------------------------------------------------------------------------------------------------------------------------------------------------------------------------------------------------------------------------------------------------------------------------------------------------------------------------------------------------------------------------------------------------------------------------------------------------------------------------------------------------------------------------------------------------------------------------------------------------------------------------------------------------------------------------------------------------------------------------------------------------------------------------------------------------------------------------------------------------------------------------------------------------------------------------------------------------------------------------------------------------------------------------------------------------------------------------------------------------------------------------------------------------------------------------------------------------------------------------------------------------------------------------------------------------------------------------------------------------------------------------------------------------------------------------------------------------------------------------------------------------------------------------------------------------------------------------------------------------------------------------------------------------------------------------------------------------------------------------------------------------------------------------------------------------------------------------------------------------------------------------------------------------------------------------------------------------------------------------------------------------------------------------------------------------------------------------------------------------------------------------|---------------------------------------------------------------------------------------------------------------------------------------------------------------------------------------------------------------------|--------------------------------------------------------------------------------------------------------------------------------------------------------------------------------------------------------------------------------------------------------------------------------------------------------------------------------|-------------------------------------------------------------------------------------------------------------------------------------------------------------------------------------------------------------------------------------------------------------------------------------------------------------------------------------------------------------------------------------------------------------------------------------------------------------------------------------------------------------------------------------------------------------------------------------------------------------------------------------------------------------------------------------------|
| EPI_ISL_949608, EPI_ISL_949609, EPI_ISL_949610, EPI_ISL_949614                                                                                                                                                                                                                                                                                                                                                                                                                                                                                                                                                                                                                                                                                                                                                                                                                                                                                                                                                                                                                                                                                                                                                                                                                                                                                                                                                                                                                                                                                                                                                                                                                                                                                                                                                                                                                                                                                                                                                                                                                                                                                                                                                                                                                                                 | West of Scotland Specialist Virology Centre, NHSGGC / MRC-University of Glasgow Centre for Virus Research                                                                                                           | COVID-19 Genomics UK (COG-UK) Consortium                                                                                                                                                                                                                                                                                       | Ana da Silva Filipe, Natasha Johnson, Kathy Smollett, Daniel Mair, Stephen Carmichael, Alice Broos, Lily Tong, Jenna Nichols, Kyriaki Nomikou; Sarah McDonald; Richard Orton, Joseph Hughes, Sreenu Vattipally, David L Robertson; Alasdair MacLean, Rory Gunson; Sharif Shaaban, Matthew Holden; Rachel Blacow, Guy Mollett, Kathy Li, James Shepherd, Antonia Ho, Emma Thomson                                                                                                                                                                                                                                                                                                          |
| EPI_ISL_949642                                                                                                                                                                                                                                                                                                                                                                                                                                                                                                                                                                                                                                                                                                                                                                                                                                                                                                                                                                                                                                                                                                                                                                                                                                                                                                                                                                                                                                                                                                                                                                                                                                                                                                                                                                                                                                                                                                                                                                                                                                                                                                                                                                                                                                                                                                 | Virology Department, Royal Infirmary of Edinburgh, NHS Lothian / School of Biological Sciences, University of Edinburgh / Institute of Genetics and Molecular Medicine, University of Edinburgh                     | COVID-19 Genomics UK (COG-UK) Consortium                                                                                                                                                                                                                                                                                       | McHugh M, Dewar R, Rooke S, Gallagher M, Balcaza C, O'Toole Á, Scher E, Hill V, McCrone JT, Colquhoun R, Yu X, Jackson B, Rambaut A, Williams TC, Templeton K                                                                                                                                                                                                                                                                                                                                                                                                                                                                                                                             |
| EPI_ISL_949671, EPI_ISL_949672, EPI_ISL_949684, EPI_ISL_949685, EPI_ISL_949686, EPI_ISL_949687                                                                                                                                                                                                                                                                                                                                                                                                                                                                                                                                                                                                                                                                                                                                                                                                                                                                                                                                                                                                                                                                                                                                                                                                                                                                                                                                                                                                                                                                                                                                                                                                                                                                                                                                                                                                                                                                                                                                                                                                                                                                                                                                                                                                                 | Liverpool Clinical Laboratories                                                                                                                                                                                     | COVID-19 Genomics UK (COG-UK) Consortium                                                                                                                                                                                                                                                                                       | Sam Haldenby, Anita Lucaci, Steve Paterson, Julian Hiscox, Alistair Darby, M Almsaud, A Alrezaihi, Muhannad Alruwaili, Stuart D Armstrong, Jones Benjamin, Eleanor G Bentley, Anu Chawla, Jordan J Clark, Angela Cowell, Richard Eccles, Isabel Garcia-Dorival, Matthew Gemmell, Alessandro Gerada, PKF Gilmore, Richard Gregory, Ximeng Han, Catherine Hartley, Margaret Hughes, Miren Iturriza-Gomara, James Johnson, L Luu, Jennifer Manson, Charlotte Nelson, Elaine O'Toole, Cassie Olateju, Rebekah Penrice-Randal , Lucille Rainbow, N.P Randle, Trevor Ian Robinson, Parul Sharma, Ghada T Shawli, James P Stewart, Neil Swainston, Ecaterina Vamos, Joanne Watts, Mark Whitehead |
| EPI_ISL_949751, EPI_ISL_949752                                                                                                                                                                                                                                                                                                                                                                                                                                                                                                                                                                                                                                                                                                                                                                                                                                                                                                                                                                                                                                                                                                                                                                                                                                                                                                                                                                                                                                                                                                                                                                                                                                                                                                                                                                                                                                                                                                                                                                                                                                                                                                                                                                                                                                                                                 | Barts Health NHS Trust                                                                                                                                                                                              | COVID-19 Genomics UK (COG-UK) Consortium                                                                                                                                                                                                                                                                                       | CUTINO-MOGUEL, Maria-Teresa; HARRINGTON, David; OWOYEMI, Dola; KULASEGARAN-SHYLINI, Raghavendran; BROAD, Claire; KELE, Beatrix                                                                                                                                                                                                                                                                                                                                                                                                                                                                                                                                                            |
| EPI_ISL_949792, EPI_ISL_949906, EPI_ISL_949907, EPI_ISL_949908, EPI_ISL_949975, EPI_ISL_949976, EPI_ISL_949977, EPI_ISL_949978, EPI_ISL_949980, EPI_ISL_949981, EPI_ISL_949982, EPI_ISL_949983, EPI_ISL_949984, EPI_ISL_949985, EPI_ISL_949987, EPI_ISL_949988, EPI_ISL_949989, EPI_ISL_949992, EPI_ISL_949993, EPI_ISL_949994, EPI_ISL_949995, EPI_ISL_949996, EPI_ISL_949997, EPI_ISL_949998, EPI_ISL_949999, EPI_ISL_950000, EPI_ISL_950001, EPI_ISL_950002, EPI_ISL_950003, EPI_ISL_950004, EPI_ISL_950005, EPI_ISL_950006, EPI_ISL_950007, EPI_ISL_950008, EPI_ISL_950009, EPI_ISL_950010, EPI_ISL_950011, EPI_ISL_950012, EPI_ISL_950013, EPI_ISL_950014, EPI_ISL_950015, EPI_ISL_950016, EPI_ISL_950017, EPI_ISL_950018, EPI_ISL_950020, EPI_ISL_950021, EPI_ISL_950022, EPI_ISL_950023, EPI_ISL_950024, EPI_ISL_950025, EPI_ISL_950026, EPI_ISL_950027, EPI_ISL_950029, EPI_ISL_950030, EPI_ISL_950031, EPI_ISL_950032, EPI_ISL_950033, EPI_ISL_950035, EPI_ISL_950036, EPI_ISL_950037, EPI_ISL_950038, EPI_ISL_950170                                                                                                                                                                                                                                                                                                                                                                                                                                                                                                                                                                                                                                                                                                                                                                                                                                                                                                                                                                                                                                                                                                                                                                                                                                                                                 | COVID-19 Genomics UK (COG-UK) Consortium                                                                                                                                                                            | Sergi Castellano, Rachel Williams, Mark Kristiansen, Paola Resende Silva, Sunando Roy, Tony Brooks, Helena Tutill, Paola Niola, Patricia Dyal, Charlotte Williams, Leysa Forrest, Yasmin Panchbhaya, Jacqueline Findlay, Samuel Weeks, Julianne Brown, Kathryn Harris, Paul Randell, James Price, Alison Holmes, Judith Breuer |                                                                                                                                                                                                                                                                                                                                                                                                                                                                                                                                                                                                                                                                                           |
| see above                                                                                                                                                                                                                                                                                                                                                                                                                                                                                                                                                                                                                                                                                                                                                                                                                                                                                                                                                                                                                                                                                                                                                                                                                                                                                                                                                                                                                                                                                                                                                                                                                                                                                                                                                                                                                                                                                                                                                                                                                                                                                                                                                                                                                                                                                                      | University College London, Great Ormond Street Hospital for Children NHS Foundation Trust, Imperial College Healthcare NHS Trust                                                                                    | COVID-19 Genomics UK (COG-UK) Consortium                                                                                                                                                                                                                                                                                       |                                                                                                                                                                                                                                                                                                                                                                                                                                                                                                                                                                                                                                                                                           |
| EPI_ISL_950350, EPI_ISL_950505, EPI_ISL_950506, EPI_ISL_950507, EPI_ISL_950508, EPI_ISL_950509, EPI_ISL_950510, EPI_ISL_950511, EPI_ISL_950512, EPI_ISL_950513, EPI_ISL_950514, EPI_ISL_950515, EPI_ISL_950516, EPI_ISL_950517, EPI_ISL_950518, EPI_ISL_950519, EPI_ISL_950520, EPI_ISL_950521, EPI_ISL_950522                                                                                                                                                                                                                                                                                                                                                                                                                                                                                                                                                                                                                                                                                                                                                                                                                                                                                                                                                                                                                                                                                                                                                                                                                                                                                                                                                                                                                                                                                                                                                                                                                                                                                                                                                                                                                                                                                                                                                                                                 |                                                                                                                                                                                                                     |                                                                                                                                                                                                                                                                                                                                |                                                                                                                                                                                                                                                                                                                                                                                                                                                                                                                                                                                                                                                                                           |
| see above                                                                                                                                                                                                                                                                                                                                                                                                                                                                                                                                                                                                                                                                                                                                                                                                                                                                                                                                                                                                                                                                                                                                                                                                                                                                                                                                                                                                                                                                                                                                                                                                                                                                                                                                                                                                                                                                                                                                                                                                                                                                                                                                                                                                                                                                                                      | Northumbria University / South Tees Hospitals NHS Foundation Trust / North Cumbria Integrated Care NHS Foundation Trust / North Tees and Hartlepool NHS Foundation Trust / Newcastle Hospitals NHS Foundation Trust | COVID-19 Genomics UK (COG-UK) Consortium                                                                                                                                                                                                                                                                                       | Darren L Smith, Andrew Nelson, Matthew Bashton, Greg R Young, Joshua Loh, John Allan, Mohammad A Tariq, Giles S Holt, Gary Black, Wen C Yew, Lynn Dover, Paul Baker, Steve Liggett, Sarah Essex, Jane Greenaway, Debra Padgett, Clive Graham, Garren Scott, Edward Barton, Emma Swindells, Brendan Payne, Jennifer Collins, Yusri Taha, Gary Eltringham                                                                                                                                                                                                                                                                                                                                   |
| EPI_ISL_950638                                                                                                                                                                                                                                                                                                                                                                                                                                                                                                                                                                                                                                                                                                                                                                                                                                                                                                                                                                                                                                                                                                                                                                                                                                                                                                                                                                                                                                                                                                                                                                                                                                                                                                                                                                                                                                                                                                                                                                                                                                                                                                                                                                                                                                                                                                 | Queens Medical Centre, Clinical Microbiology Department / DeepSeq Nottingham                                                                                                                                        | COVID-19 Genomics UK (COG-UK) Consortium                                                                                                                                                                                                                                                                                       | Gemma Clark, Wendy Smith, Manjinder Khakh, Vicki M Fleming, Michelle M Lister, Hannah Howson-Wells, Jonathan Ball, Patrick McClure, Joseph Chappell, Theocharis Tsoleridis, Nadine Holmes, Matthew Carlisle, Christopher Moore, Fei Sang, Johnny Debebe, Victoria Wright, Matthew Loose                                                                                                                                                                                                                                                                                                                                                                                                   |
| EPI_ISL_950729, EPI_ISL_950730, EPI_ISL_950731, EPI_ISL_950732, EPI_ISL_950733, EPI_ISL_950734, EPI_ISL_950735, EPI_ISL_950736, EPI_ISL_950737, EPI_ISL_950738, EPI_ISL_950739, EPI_ISL_950740, EPI_ISL_950741, EPI_ISL_950742, EPI_ISL_950743, EPI_ISL_950744, EPI_ISL_950745, EPI_ISL_950746, EPI_ISL_950747, EPI_ISL_950748, EPI_ISL_950749, EPI_ISL_950750, EPI_ISL_950751, EPI_ISL_950752, EPI_ISL_950753, EPI_ISL_950754                                                                                                                                                                                                                                                                                                                                                                                                                                                                                                                                                                                                                                                                                                                                                                                                                                                                                                                                                                                                                                                                                                                                                                                                                                                                                                                                                                                                                                                                                                                                                                                                                                                                                                                                                                                                                                                                                 |                                                                                                                                                                                                                     |                                                                                                                                                                                                                                                                                                                                |                                                                                                                                                                                                                                                                                                                                                                                                                                                                                                                                                                                                                                                                                           |
| see above                                                                                                                                                                                                                                                                                                                                                                                                                                                                                                                                                                                                                                                                                                                                                                                                                                                                                                                                                                                                                                                                                                                                                                                                                                                                                                                                                                                                                                                                                                                                                                                                                                                                                                                                                                                                                                                                                                                                                                                                                                                                                                                                                                                                                                                                                                      | Lincolnshire Hospitals and DeepSeq Nottingham                                                                                                                                                                       | COVID-19 Genomics UK (COG-UK) Consortium                                                                                                                                                                                                                                                                                       | Nichola Duckworth, Tim Sloan, Sarah Walsh, Jonathan Ball, Patrick McClure, Joeseph Chappell, Nadine Holmes, Matthew Carlisle, Christopher Moore, Fei Sang, Johnny Debebe, Victoria Wright, Matthew Loose                                                                                                                                                                                                                                                                                                                                                                                                                                                                                  |
| EPI_ISL_951500, EPI_ISL_951510, EPI_ISL_951511, EPI_ISL_951563, EPI_ISL_951597, EPI_ISL_951598, EPI_ISL_951601, EPI_ISL_951602, EPI_ISL_951604, EPI_ISL_951605, EPI_ISL_951606, EPI_ISL_951607, EPI_ISL_951608, EPI_ISL_951609, EPI_ISL_951610, EPI_ISL_951611, EPI_ISL_951612, EPI_ISL_951613, EPI_ISL_951614, EPI_ISL_951615, EPI_ISL_951616, EPI_ISL_951617, EPI_ISL_951618, EPI_ISL_951619, EPI_ISL_951620, EPI_ISL_951640, EPI_ISL_951643, EPI_ISL_951667, EPI_ISL_951673, EPI_ISL_951676, EPI_ISL_951677, EPI_ISL_951679, EPI_ISL_951684, EPI_ISL_951685, EPI_ISL_951686, EPI_ISL_951687, EPI_ISL_951688, EPI_ISL_951689, EPI_ISL_951690, EPI_ISL_951691, EPI_ISL_951693, EPI_ISL_951694, EPI_ISL_951695, EPI_ISL_951696, EPI_ISL_951698, EPI_ISL_951700, EPI_ISL_951701, EPI_ISL_951702, EPI_ISL_951703, EPI_ISL_951704, EPI_ISL_951705, EPI_ISL_951706, EPI_ISL_951708, EPI_ISL_951709, EPI_ISL_951711, EPI_ISL_951712, EPI_ISL_951713, EPI_ISL_951714, EPI_ISL_951715, EPI_ISL_951717, EPI_ISL_951718, EPI_ISL_951719, EPI_ISL_951720, EPI_ISL_951721, EPI_ISL_951725, EPI_ISL_951728, EPI_ISL_951730, EPI_ISL_951731, EPI_ISL_951732, EPI_ISL_951733, EPI_ISL_951735, EPI_ISL_951736, EPI_ISL_951737, EPI_ISL_951741, EPI_ISL_951743, EPI_ISL_951746, EPI_ISL_951747, EPI_ISL_951748, EPI_ISL_951749, EPI_ISL_951752, EPI_ISL_951755, EPI_ISL_951762, EPI_ISL_951763, EPI_ISL_951764, EPI_ISL_951768, EPI_ISL_951774, EPI_ISL_951775, EPI_ISL_951776, EPI_ISL_951777, EPI_ISL_951778, EPI_ISL_951784, EPI_ISL_951831, EPI_ISL_951832, EPI_ISL_951833, EPI_ISL_951834, EPI_ISL_951842, EPI_ISL_951845, EPI_ISL_951846, EPI_ISL_951847, EPI_ISL_951848, EPI_ISL_951849, EPI_ISL_951850, EPI_ISL_951987, EPI_ISL_951992, EPI_ISL_951998, EPI_ISL_951999, EPI_ISL_952000, EPI_ISL_952002, EPI_ISL_952168, EPI_ISL_952170, EPI_ISL_952171, EPI_ISL_952172, EPI_ISL_952173, EPI_ISL_952174, EPI_ISL_952175, EPI_ISL_952176, EPI_ISL_952177, EPI_ISL_952178, EPI_ISL_952179, EPI_ISL_952180, EPI_ISL_952199, EPI_ISL_952203, EPI_ISL_952213, EPI_ISL_952214, EPI_ISL_952215, EPI_ISL_952216, EPI_ISL_952223, EPI_ISL_952224, EPI_ISL_952226, EPI_ISL_952231, EPI_ISL_952234, EPI_ISL_952235, EPI_ISL_952238, EPI_ISL_952239, EPI_ISL_952241, EPI_ISL_952244, EPI_ISL_952246, EPI_ISL_952248, EPI_ISL_952250 |                                                                                                                                                                                                                     |                                                                                                                                                                                                                                                                                                                                |                                                                                                                                                                                                                                                                                                                                                                                                                                                                                                                                                                                                                                                                                           |
| see above                                                                                                                                                                                                                                                                                                                                                                                                                                                                                                                                                                                                                                                                                                                                                                                                                                                                                                                                                                                                                                                                                                                                                                                                                                                                                                                                                                                                                                                                                                                                                                                                                                                                                                                                                                                                                                                                                                                                                                                                                                                                                                                                                                                                                                                                                                      | Originating lab: Wales Specialist Virology Centre Sequencing lab: Pathogen Genomics Unit                                                                                                                            | Public Health Wales Microbiology Cardiff Wales Specialist Virology Centre                                                                                                                                                                                                                                                      | Catherine Moore, Johnathan Evans, Laura Gifford, Malorie Perry, Simon Cottrell, Angela Marchbank, Alec Birchley, Alexander Adams, Amy Gaskin, Bree Gatica-Wilcox, Jason Coombes, Joel Southgate, Lauren Gilbert, Lee Graham, Nicole Pacchiarini, Sara Kumziene-Summerhayes, Sarah Taylor, Sophie Jones, Sara Rey, Matthew Bull, Joanne Watkins, Sally Corden, Tom Connor                                                                                                                                                                                                                                                                                                                  |
| EPI_ISL_952380, EPI_ISL_952391, EPI_ISL_952395, EPI_ISL_952417, EPI_ISL_952438, EPI_ISL_952439, EPI_ISL_952440, EPI_ISL_952441, EPI_ISL_952442, EPI_ISL_952443, EPI_ISL_952444, EPI_ISL_952446, EPI_ISL_952447, EPI_ISL_952448, EPI_ISL_952450, EPI_ISL_952451, EPI_ISL_952452, EPI_ISL_952455, EPI_ISL_952457, EPI_ISL_952458, EPI_ISL_952461, EPI_ISL_952463, EPI_ISL_952468, EPI_ISL_952492, EPI_ISL_952493, EPI_ISL_952494, EPI_ISL_952495, EPI_ISL_952496, EPI_ISL_952497, EPI_ISL_952498, EPI_ISL_952499, EPI_ISL_952531, EPI_ISL_952532, EPI_ISL_952534, EPI_ISL_952535, EPI_ISL_952536, EPI_ISL_952537, EPI_ISL_952540, EPI_ISL_952541, EPI_ISL_952543, EPI_ISL_952544, EPI_ISL_952545, EPI_ISL_952546, EPI_ISL_952547, EPI_ISL_952550, EPI_ISL_952553, EPI_ISL_952555, EPI_ISL_952556, EPI_ISL_952557, EPI_ISL_952582, EPI_ISL_952823, EPI_ISL_952824, EPI_ISL_952825, EPI_ISL_952826, EPI_ISL_952827, EPI_ISL_952828, EPI_ISL_952836, EPI_ISL_952837, EPI_ISL_952838, EPI_ISL_952839, EPI_ISL_952857                                                                                                                                                                                                                                                                                                                                                                                                                                                                                                                                                                                                                                                                                                                                                                                                                                                                                                                                                                                                                                                                                                                                                                                                                                                                                                 |                                                                                                                                                                                                                     |                                                                                                                                                                                                                                                                                                                                |                                                                                                                                                                                                                                                                                                                                                                                                                                                                                                                                                                                                                                                                                           |
| see above                                                                                                                                                                                                                                                                                                                                                                                                                                                                                                                                                                                                                                                                                                                                                                                                                                                                                                                                                                                                                                                                                                                                                                                                                                                                                                                                                                                                                                                                                                                                                                                                                                                                                                                                                                                                                                                                                                                                                                                                                                                                                                                                                                                                                                                                                                      | Centre for Enzyme Innovation, University of Portsmouth / Translational Research Laboratory, Portsmouth Hospitals NHS Trust                                                                                          | COVID-19 Genomics UK (COG-UK) Consortium                                                                                                                                                                                                                                                                                       | Angela Beckett, Salman Goudarzi, Christopher Fearn, Kate Cook, Katie Loveson, Sharon Glaysher, Scott Elliott, Samuel Robson                                                                                                                                                                                                                                                                                                                                                                                                                                                                                                                                                               |
| EPI_ISL_957101                                                                                                                                                                                                                                                                                                                                                                                                                                                                                                                                                                                                                                                                                                                                                                                                                                                                                                                                                                                                                                                                                                                                                                                                                                                                                                                                                                                                                                                                                                                                                                                                                                                                                                                                                                                                                                                                                                                                                                                                                                                                                                                                                                                                                                                                                                 | Lighthouse Lab in Glasgow                                                                                                                                                                                           | Wellcome Sanger Institute for the COVID-19 Genomics UK (COG-UK) Consortium                                                                                                                                                                                                                                                     | Harper VanSteenhouse, Yumi Kasai, David Gray, Carol Clugston, Anna Dominiczak and Alex Alderton, Roberto Amato, Sonia Goncalves, Ewan Harrison, David K. Jackson, Ian Johnston, Dominic Kwiatkowski, Cordelia Langford, John Sillitoe on behalf of the Wellcome Sanger Institute COVID-19 Surveillance Team                                                                                                                                                                                                                                                                                                                                                                               |
| EPI_ISL_958276, EPI_ISL_958398, EPI_ISL_963428                                                                                                                                                                                                                                                                                                                                                                                                                                                                                                                                                                                                                                                                                                                                                                                                                                                                                                                                                                                                                                                                                                                                                                                                                                                                                                                                                                                                                                                                                                                                                                                                                                                                                                                                                                                                                                                                                                                                                                                                                                                                                                                                                                                                                                                                 | Lighthouse Lab in Milton Keynes                                                                                                                                                                                     | Wellcome Sanger Institute for the COVID-19 Genomics UK (COG-UK) Consortium                                                                                                                                                                                                                                                     | The Lighthouse Lab in Milton Keynes and Alex Alderton, Roberto Amato, Sonia Goncalves, Ewan Harrison, David K. Jackson, Ian Johnston, Dominic Kwiatkowski, Cordelia Langford, John Sillitoe on behalf of the Wellcome Sanger Institute COVID-19 Surveillance Team                                                                                                                                                                                                                                                                                                                                                                                                                         |
| EPI_ISL_987606, EPI_ISL_988214, EPI_ISL_988226, EPI_ISL_988228, EPI_ISL_988232, EPI_ISL_988247, EPI_ISL_988253, EPI_ISL_988255, EPI_ISL_988259, EPI_ISL_988264, EPI_ISL_988268, EPI_ISL_988274, EPI_ISL_988280, EPI_ISL_988285, EPI_ISL_988293, EPI_ISL_988298, EPI_ISL_988300, EPI_ISL_988302, EPI_ISL_988304, EPI_ISL_988315, EPI_ISL_988323, EPI_ISL_988324, EPI_ISL_988333, EPI_ISL_988339, EPI_ISL_988340, EPI_ISL_988343, EPI_ISL_988355, EPI_ISL_988359, EPI_ISL_988381, EPI_ISL_988390, EPI_ISL_988397, EPI_ISL_988409, EPI_ISL_988420, EPI_ISL_988429, EPI_ISL_988433, EPI_ISL_988435, EPI_ISL_988437, EPI_ISL_988442, EPI_ISL_988451, EPI_ISL_988456, EPI_ISL_988457, EPI_ISL_988475, EPI_ISL_988477, EPI_ISL_988478, EPI_ISL_988481                                                                                                                                                                                                                                                                                                                                                                                                                                                                                                                                                                                                                                                                                                                                                                                                                                                                                                                                                                                                                                                                                                                                                                                                                                                                                                                                                                                                                                                                                                                                                                 |                                                                                                                                                                                                                     |                                                                                                                                                                                                                                                                                                                                |                                                                                                                                                                                                                                                                                                                                                                                                                                                                                                                                                                                                                                                                                           |
| see above                                                                                                                                                                                                                                                                                                                                                                                                                                                                                                                                                                                                                                                                                                                                                                                                                                                                                                                                                                                                                                                                                                                                                                                                                                                                                                                                                                                                                                                                                                                                                                                                                                                                                                                                                                                                                                                                                                                                                                                                                                                                                                                                                                                                                                                                                                      | Lighthouse Lab in Cambridge                                                                                                                                                                                         | Wellcome Sanger Institute for the COVID-19 Genomics UK (COG-UK) Consortium                                                                                                                                                                                                                                                     | Rob Howes, The Lighthouse Lab in Cambridge and Alex Alderton, Roberto Amato, Sonia Goncalves, Ewan Harrison, David K. Jackson, Ian Johnston, Dominic Kwiatkowski, Cordelia Langford, John Sillitoe on behalf of the Wellcome Sanger Institute COVID-19 Surveillance Team ( <a href="http://www.sanger.ac.uk/covid-team">http://www.sanger.ac.uk/covid-team</a> )                                                                                                                                                                                                                                                                                                                          |
| EPI_ISL_990003, EPI_ISL_990043, EPI_ISL_990044, EPI_ISL_990045, EPI_ISL_990046, EPI_ISL_990047, EPI_ISL_990048, EPI_ISL_990049, EPI_ISL_990050, EPI_ISL_990051, EPI_ISL_990052, EPI_ISL_990053, EPI_ISL_990054, EPI_ISL_990055, EPI_ISL_990056, EPI_ISL_990057, EPI_ISL_990058, EPI_ISL_990059, EPI_ISL_990060, EPI_ISL_990061, EPI_ISL_990062, EPI_ISL_990063, EPI_ISL_990064, EPI_ISL_990065, EPI_ISL_990066, EPI_ISL_990067, EPI_ISL_990068, EPI_ISL_990069, EPI_ISL_990070, EPI_ISL_990071, EPI_ISL_990072, EPI_ISL_990073, EPI_ISL_990074, EPI_ISL_990075, EPI_ISL_990076, EPI_ISL_990077, EPI_ISL_990078, EPI_ISL_990079, EPI_ISL_990080, EPI_ISL_990081                                                                                                                                                                                                                                                                                                                                                                                                                                                                                                                                                                                                                                                                                                                                                                                                                                                                                                                                                                                                                                                                                                                                                                                                                                                                                                                                                                                                                                                                                                                                                                                                                                                 |                                                                                                                                                                                                                     |                                                                                                                                                                                                                                                                                                                                |                                                                                                                                                                                                                                                                                                                                                                                                                                                                                                                                                                                                                                                                                           |
| see above                                                                                                                                                                                                                                                                                                                                                                                                                                                                                                                                                                                                                                                                                                                                                                                                                                                                                                                                                                                                                                                                                                                                                                                                                                                                                                                                                                                                                                                                                                                                                                                                                                                                                                                                                                                                                                                                                                                                                                                                                                                                                                                                                                                                                                                                                                      | Lighthouse Lab in Alderley Park                                                                                                                                                                                     | Wellcome Sanger Institute for the COVID-19 Genomics UK (COG-UK) Consortium                                                                                                                                                                                                                                                     | Jacquelyn Wynn, Mairead Hyland, The Lighthouse Lab in Alderley Park and Alex Alderton, Roberto Amato, Sonia Goncalves, Ewan Harrison, David K. Jackson, Ian Johnston, Dominic Kwiatkowski, Cordelia Langford, John Sillitoe on behalf of the Wellcome Sanger Institute COVID-19 Surveillance Team                                                                                                                                                                                                                                                                                                                                                                                         |
| EPI_ISL_991173                                                                                                                                                                                                                                                                                                                                                                                                                                                                                                                                                                                                                                                                                                                                                                                                                                                                                                                                                                                                                                                                                                                                                                                                                                                                                                                                                                                                                                                                                                                                                                                                                                                                                                                                                                                                                                                                                                                                                                                                                                                                                                                                                                                                                                                                                                 | Lighthouse Lab in Glasgow                                                                                                                                                                                           | Wellcome Sanger Institute for the COVID-19 Genomics UK (COG-UK) Consortium                                                                                                                                                                                                                                                     | Harper VanSteenhouse, Yumi Kasai, David Gray, Carol Clugston, Anna Dominiczak and Alex Alderton, Roberto Amato, Sonia Goncalves, Ewan Harrison, David K. Jackson, Ian Johnston, Dominic Kwiatkowski, Cordelia Langford, John Sillitoe on behalf of the Wellcome Sanger Institute COVID-19 Surveillance Team                                                                                                                                                                                                                                                                                                                                                                               |
| EPI_ISL_991174, EPI_ISL_991175, EPI_ISL_991176, EPI_ISL_991177, EPI_ISL_991179, EPI_ISL_991180, EPI_ISL_991181, EPI_ISL_991182, EPI_ISL_991183, EPI_ISL_991184, EPI_ISL_991185, EPI_ISL_991186, EPI_ISL_991187, EPI_ISL_991188, EPI_ISL_991189, EPI_ISL_991190, EPI_ISL_991191, EPI_ISL_991192, EPI_ISL_991193, EPI_ISL_991194, EPI_ISL_991195, EPI_ISL_991196, EPI_ISL_991197, EPI_ISL_991198, EPI_ISL_991199, EPI_ISL_991200, EPI_ISL_991201, EPI_ISL_991202, EPI_ISL_991203, EPI_ISL_991204, EPI_ISL_991206, EPI_ISL_991207, EPI_ISL_991208, EPI_ISL_991209, EPI_ISL_991210, EPI_ISL_991211, EPI_ISL_991212, EPI_ISL_991214, EPI_ISL_991215, EPI_ISL_991216, EPI_ISL_991217, EPI_ISL_991218, EPI_ISL_991219, EPI_ISL_991220, EPI_ISL_991221, EPI_ISL_991269, EPI_ISL_991272, EPI_ISL_991274, EPI_ISL_991291, EPI_ISL_991292, EPI_ISL_991293, EPI_ISL_991294, EPI_ISL_991295, EPI_ISL_991300, EPI_ISL_991302, EPI_ISL_991306                                                                                                                                                                                                                                                                                                                                                                                                                                                                                                                                                                                                                                                                                                                                                                                                                                                                                                                                                                                                                                                                                                                                                                                                                                                                                                                                                                                 |                                                                                                                                                                                                                     |                                                                                                                                                                                                                                                                                                                                |                                                                                                                                                                                                                                                                                                                                                                                                                                                                                                                                                                                                                                                                                           |
| see above                                                                                                                                                                                                                                                                                                                                                                                                                                                                                                                                                                                                                                                                                                                                                                                                                                                                                                                                                                                                                                                                                                                                                                                                                                                                                                                                                                                                                                                                                                                                                                                                                                                                                                                                                                                                                                                                                                                                                                                                                                                                                                                                                                                                                                                                                                      | Lighthouse Lab in Alderley Park                                                                                                                                                                                     | Wellcome Sanger Institute for the COVID-19 Genomics UK (COG-UK) Consortium                                                                                                                                                                                                                                                     | Jacquelyn Wynn, Mairead Hyland, The Lighthouse Lab in Alderley Park and Alex Alderton, Roberto Amato, Sonia Goncalves, Ewan Harrison, David K. Jackson, Ian Johnston, Dominic Kwiatkowski, Cordelia Langford, John Sillitoe on behalf of the Wellcome Sanger Institute COVID-19 Surveillance Team                                                                                                                                                                                                                                                                                                                                                                                         |

EPI\_ISL\_991354, EPI\_ISL\_991361, EPI\_ISL\_991366, EPI\_ISL\_991371, EPI\_ISL\_991380, EPI\_ISL\_991392, EPI\_ISL\_991394, EPI\_ISL\_991398, EPI\_ISL\_991400, EPI\_ISL\_991405, EPI\_ISL\_991415, EPI\_ISL\_991418, EPI\_ISL\_991423, EPI\_ISL\_991425, EPI\_ISL\_991440, EPI\_ISL\_991447, EPI\_ISL\_991454, EPI\_ISL\_991463, EPI\_ISL\_991477, EPI\_ISL\_991479, EPI\_ISL\_991481, EPI\_ISL\_991483, EPI\_ISL\_991501, EPI\_ISL\_991510, EPI\_ISL\_991531, EPI\_ISL\_991523, EPI\_ISL\_991533, EPI\_ISL\_991545

|                                                                                                                                                                                                                                                                                                                                                                                                                                                                                                                                                                                                                                                                                                                                                                                                                                                                                                                                                                                                                                                                                                                                                                                                                                                                                                                                                                                                                                                                                                                                                                                                                                                                                                                                                                                                                                                                                                                                                                                                                                                                                                                                                                                                                                                                                                                                                                                                                                                                                                                                                                                                                                                                                                                                                                                                                                                                                                                                                                                                                                                                                                                                                                                                                                                                                                                                                                                                                                                                                                                                                                                                                                                                                                                                                                                                                                                                                                                                                                                                                                                                                                                                                                                                                                                                                                                                                                                                                                                                                                                                                                                                                                                                                                                                                                                                                                                                                                                                                                                                                                                                                                                                                                                                                                                                                                                                                |                                 |                                                                            |                                                                                                                                                                                                                                                                                                             |
|------------------------------------------------------------------------------------------------------------------------------------------------------------------------------------------------------------------------------------------------------------------------------------------------------------------------------------------------------------------------------------------------------------------------------------------------------------------------------------------------------------------------------------------------------------------------------------------------------------------------------------------------------------------------------------------------------------------------------------------------------------------------------------------------------------------------------------------------------------------------------------------------------------------------------------------------------------------------------------------------------------------------------------------------------------------------------------------------------------------------------------------------------------------------------------------------------------------------------------------------------------------------------------------------------------------------------------------------------------------------------------------------------------------------------------------------------------------------------------------------------------------------------------------------------------------------------------------------------------------------------------------------------------------------------------------------------------------------------------------------------------------------------------------------------------------------------------------------------------------------------------------------------------------------------------------------------------------------------------------------------------------------------------------------------------------------------------------------------------------------------------------------------------------------------------------------------------------------------------------------------------------------------------------------------------------------------------------------------------------------------------------------------------------------------------------------------------------------------------------------------------------------------------------------------------------------------------------------------------------------------------------------------------------------------------------------------------------------------------------------------------------------------------------------------------------------------------------------------------------------------------------------------------------------------------------------------------------------------------------------------------------------------------------------------------------------------------------------------------------------------------------------------------------------------------------------------------------------------------------------------------------------------------------------------------------------------------------------------------------------------------------------------------------------------------------------------------------------------------------------------------------------------------------------------------------------------------------------------------------------------------------------------------------------------------------------------------------------------------------------------------------------------------------------------------------------------------------------------------------------------------------------------------------------------------------------------------------------------------------------------------------------------------------------------------------------------------------------------------------------------------------------------------------------------------------------------------------------------------------------------------------------------------------------------------------------------------------------------------------------------------------------------------------------------------------------------------------------------------------------------------------------------------------------------------------------------------------------------------------------------------------------------------------------------------------------------------------------------------------------------------------------------------------------------------------------------------------------------------------------------------------------------------------------------------------------------------------------------------------------------------------------------------------------------------------------------------------------------------------------------------------------------------------------------------------------------------------------------------------------------------------------------------------------------------------------------------------------|---------------------------------|----------------------------------------------------------------------------|-------------------------------------------------------------------------------------------------------------------------------------------------------------------------------------------------------------------------------------------------------------------------------------------------------------|
| see above                                                                                                                                                                                                                                                                                                                                                                                                                                                                                                                                                                                                                                                                                                                                                                                                                                                                                                                                                                                                                                                                                                                                                                                                                                                                                                                                                                                                                                                                                                                                                                                                                                                                                                                                                                                                                                                                                                                                                                                                                                                                                                                                                                                                                                                                                                                                                                                                                                                                                                                                                                                                                                                                                                                                                                                                                                                                                                                                                                                                                                                                                                                                                                                                                                                                                                                                                                                                                                                                                                                                                                                                                                                                                                                                                                                                                                                                                                                                                                                                                                                                                                                                                                                                                                                                                                                                                                                                                                                                                                                                                                                                                                                                                                                                                                                                                                                                                                                                                                                                                                                                                                                                                                                                                                                                                                                                      | Lighthouse Lab in Glasgow       | Wellcome Sanger Institute for the COVID-19 Genomics UK (COG-UK) Consortium | Harper VanSteenhouse, Yumi Kasai, David Gray, Carol Clugston, Anna Dominiczak and Alex Alderton, Roberto Amato, Sonia Goncalves, Ewan Harrison, David K. Jackson, Ian Johnston, Dominic Kwiatkowski, Cordelia Langford, John Sillitoe on behalf of the Wellcome Sanger Institute COVID-19 Surveillance Team |
| EPI_ISL_991566, EPI_ISL_991567, EPI_ISL_991568, EPI_ISL_991569, EPI_ISL_991570, EPI_ISL_991571, EPI_ISL_991572, EPI_ISL_991573, EPI_ISL_991574, EPI_ISL_991575, EPI_ISL_991576, EPI_ISL_991577, EPI_ISL_991578, EPI_ISL_991579, EPI_ISL_991580, EPI_ISL_991581, EPI_ISL_991582, EPI_ISL_991583, EPI_ISL_991584, EPI_ISL_991585, EPI_ISL_991586, EPI_ISL_991587, EPI_ISL_991588, EPI_ISL_991589, EPI_ISL_991590, EPI_ISL_991591, EPI_ISL_991592, EPI_ISL_991593, EPI_ISL_991594, EPI_ISL_991596, EPI_ISL_991597, EPI_ISL_991598, EPI_ISL_991599, EPI_ISL_991600, EPI_ISL_991601, EPI_ISL_991602, EPI_ISL_991603, EPI_ISL_991604, EPI_ISL_991605, EPI_ISL_991606, EPI_ISL_991607, EPI_ISL_991608, EPI_ISL_991609, EPI_ISL_991610, EPI_ISL_991611, EPI_ISL_991612, EPI_ISL_991613, EPI_ISL_991614, EPI_ISL_991615, EPI_ISL_991616, EPI_ISL_991617, EPI_ISL_991618, EPI_ISL_991619, EPI_ISL_991620, EPI_ISL_991621, EPI_ISL_991622, EPI_ISL_991623, EPI_ISL_991624, EPI_ISL_991625, EPI_ISL_991626, EPI_ISL_991627, EPI_ISL_991628, EPI_ISL_991630, EPI_ISL_991631, EPI_ISL_991632, EPI_ISL_991633, EPI_ISL_991634, EPI_ISL_991635, EPI_ISL_991636, EPI_ISL_991637, EPI_ISL_991638, EPI_ISL_991639, EPI_ISL_991640, EPI_ISL_991641, EPI_ISL_991642, EPI_ISL_991643, EPI_ISL_991644, EPI_ISL_991645, EPI_ISL_991646, EPI_ISL_991647, EPI_ISL_991648, EPI_ISL_991649, EPI_ISL_991650, EPI_ISL_991651, EPI_ISL_991652, EPI_ISL_991654, EPI_ISL_991655, EPI_ISL_991656, EPI_ISL_991657, EPI_ISL_991658, EPI_ISL_991659, EPI_ISL_991660, EPI_ISL_991661, EPI_ISL_991662, EPI_ISL_991663, EPI_ISL_991664, EPI_ISL_991665, EPI_ISL_991666, EPI_ISL_991667, EPI_ISL_991668, EPI_ISL_991669, EPI_ISL_991670, EPI_ISL_991671, EPI_ISL_991672, EPI_ISL_991673, EPI_ISL_991674, EPI_ISL_991675, EPI_ISL_991676, EPI_ISL_991677, EPI_ISL_991678, EPI_ISL_991679, EPI_ISL_991681, EPI_ISL_991682, EPI_ISL_991683, EPI_ISL_991684, EPI_ISL_991685, EPI_ISL_991686, EPI_ISL_991687, EPI_ISL_991688, EPI_ISL_991689, EPI_ISL_991690, EPI_ISL_991691, EPI_ISL_991693, EPI_ISL_991695, EPI_ISL_991696, EPI_ISL_991697, EPI_ISL_991698, EPI_ISL_991699, EPI_ISL_991700, EPI_ISL_991701, EPI_ISL_991702, EPI_ISL_991704, EPI_ISL_991705, EPI_ISL_991706, EPI_ISL_991707, EPI_ISL_991708, EPI_ISL_991709, EPI_ISL_991710, EPI_ISL_991711, EPI_ISL_991712, EPI_ISL_991713, EPI_ISL_991714, EPI_ISL_991716, EPI_ISL_991717, EPI_ISL_991718, EPI_ISL_991719, EPI_ISL_991720, EPI_ISL_991721, EPI_ISL_991722, EPI_ISL_991723, EPI_ISL_991724, EPI_ISL_991725, EPI_ISL_991726, EPI_ISL_991727, EPI_ISL_991728, EPI_ISL_991729, EPI_ISL_991730, EPI_ISL_991731, EPI_ISL_991732, EPI_ISL_991733, EPI_ISL_991734, EPI_ISL_991735, EPI_ISL_991736, EPI_ISL_991737, EPI_ISL_991738, EPI_ISL_991739, EPI_ISL_991740, EPI_ISL_991741, EPI_ISL_991742, EPI_ISL_991743, EPI_ISL_991744, EPI_ISL_991745, EPI_ISL_991746, EPI_ISL_991747, EPI_ISL_991748, EPI_ISL_991749, EPI_ISL_991750, EPI_ISL_991751, EPI_ISL_991752, EPI_ISL_991753, EPI_ISL_991754, EPI_ISL_991756, EPI_ISL_991757, EPI_ISL_991758, EPI_ISL_991759, EPI_ISL_991760, EPI_ISL_991761, EPI_ISL_991762, EPI_ISL_991763, EPI_ISL_991764, EPI_ISL_991765, EPI_ISL_991766, EPI_ISL_991767, EPI_ISL_991768, EPI_ISL_991769, EPI_ISL_991770, EPI_ISL_991771, EPI_ISL_991772, EPI_ISL_991773, EPI_ISL_991774, EPI_ISL_991775, EPI_ISL_991776, EPI_ISL_991777, EPI_ISL_991778, EPI_ISL_991779, EPI_ISL_991780, EPI_ISL_991781, EPI_ISL_991782, EPI_ISL_991783, EPI_ISL_991784, EPI_ISL_991785, EPI_ISL_991786, EPI_ISL_991787, EPI_ISL_991788, EPI_ISL_991789, EPI_ISL_991790, EPI_ISL_991791, EPI_ISL_991792, EPI_ISL_991794, EPI_ISL_991795, EPI_ISL_991796, EPI_ISL_991797, EPI_ISL_991798, EPI_ISL_991799, EPI_ISL_991800, EPI_ISL_991801, EPI_ISL_991802, EPI_ISL_991803, EPI_ISL_991804, EPI_ISL_991805, EPI_ISL_991806, EPI_ISL_991807, EPI_ISL_991808, EPI_ISL_991809, EPI_ISL_991810, EPI_ISL_991811, EPI_ISL_991812, EPI_ISL_991813, EPI_ISL_991814, EPI_ISL_991815, EPI_ISL_991816, EPI_ISL_991818, EPI_ISL_991819, EPI_ISL_991820, EPI_ISL_991821, EPI_ISL_991822, EPI_ISL_991823, EPI_ISL_991824, EPI_ISL_991825, EPI_ISL_991827, EPI_ISL_991828, EPI_ISL_991829, EPI_ISL_991830, EPI_ISL_991831, EPI_ISL_991832, EPI_ISL_991833, EPI_ISL_991835, EPI_ISL_991836, EPI_ISL_991837, EPI_ISL_991838, EPI_ISL_991839, EPI_ISL_991840, EPI_ISL_991841, EPI_ISL_991842, EPI_ISL_991843, EPI_ISL_991844, EPI_ISL_991845, EPI_ISL_991847, EPI_ISL_991849, EPI_ISL_991850, EPI_ISL_991851, EPI_ISL_991852, EPI_ISL_991853, EPI_ISL_991854, EPI_ISL_991855, EPI_ISL_991856, EPI_ISL_991857, EPI_ISL_991858, EPI_ISL_991859, EPI_ISL_991861, EPI_ISL_991862, EPI_ISL_991863, EPI_ISL_991864, EPI_ISL_991865, EPI_ISL_991866, EPI_ISL_991867, EPI_ISL_991868, EPI_ISL_991869, EPI_ISL_991870, EPI_ISL_991871, EPI_ISL_991872, EPI_ISL_991874, EPI_ISL_991875, EPI_ISL_991876, EPI_ISL_991877, EPI_ISL_991878, EPI_ISL_991879, EPI_ISL_991880, EPI_ISL_991881, EPI_ISL_991882, EPI_ISL_991883, EPI_ISL_991884, EPI_ISL_991885, EPI_ISL_991886, EPI_ISL_991887, EPI_ISL_991888, EPI_ISL_991889, EPI_ISL_991890, EPI_ISL_991891, EPI_ISL_991892, EPI_ISL_991893, EPI_ISL_991894, EPI_ISL_991895, EPI_ISL_991896, EPI_ISL_991897, EPI_ISL_991898, EPI_ISL_991899, EPI_ISL_991900, EPI_ISL_991901, EPI_ISL_991902, EPI_ISL_991903 |                                 |                                                                            |                                                                                                                                                                                                                                                                                                             |
| see above                                                                                                                                                                                                                                                                                                                                                                                                                                                                                                                                                                                                                                                                                                                                                                                                                                                                                                                                                                                                                                                                                                                                                                                                                                                                                                                                                                                                                                                                                                                                                                                                                                                                                                                                                                                                                                                                                                                                                                                                                                                                                                                                                                                                                                                                                                                                                                                                                                                                                                                                                                                                                                                                                                                                                                                                                                                                                                                                                                                                                                                                                                                                                                                                                                                                                                                                                                                                                                                                                                                                                                                                                                                                                                                                                                                                                                                                                                                                                                                                                                                                                                                                                                                                                                                                                                                                                                                                                                                                                                                                                                                                                                                                                                                                                                                                                                                                                                                                                                                                                                                                                                                                                                                                                                                                                                                                      | Lighthouse Lab in Alderley Park | Wellcome Sanger Institute for the COVID-19 Genomics UK (COG-UK) Consortium | Jacquelyn Wynn, Mairead Hyland, The Lighthouse Lab in Alderley Park and Alex Alderton, Roberto Amato, Sonia Goncalves, Ewan Harrison, David K. Jackson, Ian Johnston, Dominic Kwiatkowski, Cord                                                                                                             |

| (COG-UK) Consortium                                                                                                                                                                                                                                                                                                                                                                                                                                                                                                                                                                                                                                                                                                                                                                                                                                                                                                                                                                                                                                                                                                                                                                                                                                                                                                                                                                                                                                                                                                                                                                                                                                                                                                                                                                                                                                                                                                                                                                                                                                                                                                                                                                                                                                                                                                                                                                                                                                                                                                                                                                                                                                                                                                                                                                                                                                                                                                                                                                                                                                                                                                                                                                                                                                                                                                                                                                                                                                                                                                                                                                                                                                                                                                                                                                                                                                                                                                                                                                                                                                                                                                                            |                                                                                                                                                                                                                     | David K. Jackson, Ian Johnston, Dominic Kwiatkowski, Cordelia Langford, John Sillitoe on behalf of the Wellcome Sanger Institute COVID-19 Surveillance Team |                                                                                                                                                                                                                                                                                                                                                                                                                                                                                                                                                                                                                                                                                         |
|------------------------------------------------------------------------------------------------------------------------------------------------------------------------------------------------------------------------------------------------------------------------------------------------------------------------------------------------------------------------------------------------------------------------------------------------------------------------------------------------------------------------------------------------------------------------------------------------------------------------------------------------------------------------------------------------------------------------------------------------------------------------------------------------------------------------------------------------------------------------------------------------------------------------------------------------------------------------------------------------------------------------------------------------------------------------------------------------------------------------------------------------------------------------------------------------------------------------------------------------------------------------------------------------------------------------------------------------------------------------------------------------------------------------------------------------------------------------------------------------------------------------------------------------------------------------------------------------------------------------------------------------------------------------------------------------------------------------------------------------------------------------------------------------------------------------------------------------------------------------------------------------------------------------------------------------------------------------------------------------------------------------------------------------------------------------------------------------------------------------------------------------------------------------------------------------------------------------------------------------------------------------------------------------------------------------------------------------------------------------------------------------------------------------------------------------------------------------------------------------------------------------------------------------------------------------------------------------------------------------------------------------------------------------------------------------------------------------------------------------------------------------------------------------------------------------------------------------------------------------------------------------------------------------------------------------------------------------------------------------------------------------------------------------------------------------------------------------------------------------------------------------------------------------------------------------------------------------------------------------------------------------------------------------------------------------------------------------------------------------------------------------------------------------------------------------------------------------------------------------------------------------------------------------------------------------------------------------------------------------------------------------------------------------------------------------------------------------------------------------------------------------------------------------------------------------------------------------------------------------------------------------------------------------------------------------------------------------------------------------------------------------------------------------------------------------------------------------------------------------------------------------|---------------------------------------------------------------------------------------------------------------------------------------------------------------------------------------------------------------------|-------------------------------------------------------------------------------------------------------------------------------------------------------------|-----------------------------------------------------------------------------------------------------------------------------------------------------------------------------------------------------------------------------------------------------------------------------------------------------------------------------------------------------------------------------------------------------------------------------------------------------------------------------------------------------------------------------------------------------------------------------------------------------------------------------------------------------------------------------------------|
| EPI_ISL_992350, EPI_ISL_992351, EPI_ISL_992354, EPI_ISL_992355, EPI_ISL_992356, EPI_ISL_992357, EPI_ISL_992358, EPI_ISL_992359, EPI_ISL_992367, EPI_ISL_992368, EPI_ISL_992369, EPI_ISL_992370, EPI_ISL_992372, EPI_ISL_992373, EPI_ISL_992378, EPI_ISL_992379, EPI_ISL_992381, EPI_ISL_992383, EPI_ISL_992384, EPI_ISL_992385, EPI_ISL_992386, EPI_ISL_992387, EPI_ISL_992391, EPI_ISL_992394, EPI_ISL_992397, EPI_ISL_992401, EPI_ISL_992405, EPI_ISL_992406, EPI_ISL_992407, EPI_ISL_992408, EPI_ISL_992409, EPI_ISL_992412, EPI_ISL_992414                                                                                                                                                                                                                                                                                                                                                                                                                                                                                                                                                                                                                                                                                                                                                                                                                                                                                                                                                                                                                                                                                                                                                                                                                                                                                                                                                                                                                                                                                                                                                                                                                                                                                                                                                                                                                                                                                                                                                                                                                                                                                                                                                                                                                                                                                                                                                                                                                                                                                                                                                                                                                                                                                                                                                                                                                                                                                                                                                                                                                                                                                                                                                                                                                                                                                                                                                                                                                                                                                                                                                                                                 |                                                                                                                                                                                                                     |                                                                                                                                                             |                                                                                                                                                                                                                                                                                                                                                                                                                                                                                                                                                                                                                                                                                         |
| see above                                                                                                                                                                                                                                                                                                                                                                                                                                                                                                                                                                                                                                                                                                                                                                                                                                                                                                                                                                                                                                                                                                                                                                                                                                                                                                                                                                                                                                                                                                                                                                                                                                                                                                                                                                                                                                                                                                                                                                                                                                                                                                                                                                                                                                                                                                                                                                                                                                                                                                                                                                                                                                                                                                                                                                                                                                                                                                                                                                                                                                                                                                                                                                                                                                                                                                                                                                                                                                                                                                                                                                                                                                                                                                                                                                                                                                                                                                                                                                                                                                                                                                                                      | Lighthouse Lab in Alderley Park                                                                                                                                                                                     | Wellcome Sanger Institute for the COVID-19 Genomics UK (COG-UK) Consortium                                                                                  | Jacquelyn Wynn, Mairead Hyland, The Lighthouse Lab in Alderley Park and Alex Alderton, Roberto Amato, Sonia Goncalves, Ewan Harrison, David K. Jackson, Ian Johnston, Dominic Kwiatkowski, Cordelia Langford, John Sillitoe on behalf of the Wellcome Sanger Institute COVID-19 Surveillance Team                                                                                                                                                                                                                                                                                                                                                                                       |
| EPI_ISL_992419, EPI_ISL_992420, EPI_ISL_992421, EPI_ISL_992422, EPI_ISL_992424, EPI_ISL_992425, EPI_ISL_992427, EPI_ISL_992428, EPI_ISL_992430, EPI_ISL_992431, EPI_ISL_992433, EPI_ISL_992434, EPI_ISL_992435, EPI_ISL_992441, EPI_ISL_992444, EPI_ISL_992445, EPI_ISL_992451, EPI_ISL_992452, EPI_ISL_992457, EPI_ISL_992458, EPI_ISL_992459, EPI_ISL_992464, EPI_ISL_992465, EPI_ISL_992468, EPI_ISL_992470, EPI_ISL_992471, EPI_ISL_992474, EPI_ISL_992477, EPI_ISL_992478, EPI_ISL_992480, EPI_ISL_992481, EPI_ISL_992485, EPI_ISL_992487, EPI_ISL_992489, EPI_ISL_992493, EPI_ISL_992494, EPI_ISL_992495, EPI_ISL_992498, EPI_ISL_992499, EPI_ISL_992500, EPI_ISL_992502, EPI_ISL_992505, EPI_ISL_992506, EPI_ISL_992507, EPI_ISL_992508, EPI_ISL_992510, EPI_ISL_992514, EPI_ISL_992515, EPI_ISL_992516, EPI_ISL_992519, EPI_ISL_992522, EPI_ISL_992523, EPI_ISL_992524, EPI_ISL_992526, EPI_ISL_992527, EPI_ISL_992530, EPI_ISL_992532, EPI_ISL_992534, EPI_ISL_992536, EPI_ISL_992537, EPI_ISL_992538, EPI_ISL_992541, EPI_ISL_992543, EPI_ISL_992544, EPI_ISL_992545, EPI_ISL_992548, EPI_ISL_992550, EPI_ISL_992551, EPI_ISL_992552, EPI_ISL_992553, EPI_ISL_992554, EPI_ISL_992555, EPI_ISL_992556, EPI_ISL_992558, EPI_ISL_992560, EPI_ISL_992565, EPI_ISL_992566, EPI_ISL_992567, EPI_ISL_992568, EPI_ISL_992570, EPI_ISL_992578, EPI_ISL_992579, EPI_ISL_992585, EPI_ISL_992589, EPI_ISL_992590, EPI_ISL_992591, EPI_ISL_992593, EPI_ISL_992594, EPI_ISL_992595, EPI_ISL_992596, EPI_ISL_992597, EPI_ISL_992600, EPI_ISL_992601, EPI_ISL_992602, EPI_ISL_992607, EPI_ISL_992608, EPI_ISL_992611, EPI_ISL_992616, EPI_ISL_992617, EPI_ISL_992618, EPI_ISL_992619, EPI_ISL_992620, EPI_ISL_992621, EPI_ISL_992622, EPI_ISL_992628, EPI_ISL_992631, EPI_ISL_992634, EPI_ISL_992635, EPI_ISL_992638, EPI_ISL_992642, EPI_ISL_992644, EPI_ISL_992649, EPI_ISL_992650, EPI_ISL_992654, EPI_ISL_992657, EPI_ISL_992659, EPI_ISL_992662, EPI_ISL_992663, EPI_ISL_992666, EPI_ISL_992668, EPI_ISL_992669, EPI_ISL_992671, EPI_ISL_992672, EPI_ISL_992674, EPI_ISL_992675, EPI_ISL_992676, EPI_ISL_992679, EPI_ISL_992680, EPI_ISL_992687, EPI_ISL_992688, EPI_ISL_992691, EPI_ISL_992696, EPI_ISL_992697, EPI_ISL_992704, EPI_ISL_992706, EPI_ISL_992708, EPI_ISL_992719, EPI_ISL_992723, EPI_ISL_992724, EPI_ISL_992725, EPI_ISL_992727, EPI_ISL_992731, EPI_ISL_992732, EPI_ISL_992733, EPI_ISL_992738, EPI_ISL_992747, EPI_ISL_992750, EPI_ISL_992752, EPI_ISL_992758, EPI_ISL_992759, EPI_ISL_992760, EPI_ISL_992762, EPI_ISL_992764, EPI_ISL_992767, EPI_ISL_992769, EPI_ISL_992771, EPI_ISL_992772, EPI_ISL_992777, EPI_ISL_992779, EPI_ISL_992782, EPI_ISL_992783, EPI_ISL_992784, EPI_ISL_992786, EPI_ISL_992790, EPI_ISL_992792, EPI_ISL_992793, EPI_ISL_992794, EPI_ISL_992795, EPI_ISL_992796, EPI_ISL_992797, EPI_ISL_992798, EPI_ISL_992803, EPI_ISL_992804, EPI_ISL_992806, EPI_ISL_992807, EPI_ISL_992809, EPI_ISL_992812, EPI_ISL_992813, EPI_ISL_992814, EPI_ISL_992816, EPI_ISL_992818, EPI_ISL_992819, EPI_ISL_992822, EPI_ISL_992823, EPI_ISL_992827, EPI_ISL_992830, EPI_ISL_992831, EPI_ISL_992832, EPI_ISL_992834, EPI_ISL_992836, EPI_ISL_992883, EPI_ISL_992884, EPI_ISL_992885, EPI_ISL_992887, EPI_ISL_992891, EPI_ISL_992893, EPI_ISL_992894, EPI_ISL_992895, EPI_ISL_992897, EPI_ISL_992898, EPI_ISL_992901, EPI_ISL_992903, EPI_ISL_992905, EPI_ISL_992908, EPI_ISL_992912, EPI_ISL_992924, EPI_ISL_992925, EPI_ISL_992926, EPI_ISL_992931, EPI_ISL_992934, EPI_ISL_992935, EPI_ISL_992936, EPI_ISL_992938, EPI_ISL_992939, EPI_ISL_992943, EPI_ISL_992944, EPI_ISL_992948, EPI_ISL_992954, EPI_ISL_992958, EPI_ISL_992961, EPI_ISL_992962, EPI_ISL_992965, EPI_ISL_992966, EPI_ISL_992970, EPI_ISL_992971, EPI_ISL_992972, EPI_ISL_992973, EPI_ISL_992974, EPI_ISL_992975, EPI_ISL_992977, EPI_ISL_992980, EPI_ISL_992983, EPI_ISL_992986, EPI_ISL_992993, EPI_ISL_992995, EPI_ISL_992998, EPI_ISL_992999, EPI_ISL_993003, EPI_ISL_993005, EPI_ISL_993009, EPI_ISL_993014, EPI_ISL_993020, EPI_ISL_993023, EPI_ISL_993024, EPI_ISL_993027, EPI_ISL_993033, EPI_ISL_993034, EPI_ISL_993040, EPI_ISL_993042 |                                                                                                                                                                                                                     |                                                                                                                                                             |                                                                                                                                                                                                                                                                                                                                                                                                                                                                                                                                                                                                                                                                                         |
| see above                                                                                                                                                                                                                                                                                                                                                                                                                                                                                                                                                                                                                                                                                                                                                                                                                                                                                                                                                                                                                                                                                                                                                                                                                                                                                                                                                                                                                                                                                                                                                                                                                                                                                                                                                                                                                                                                                                                                                                                                                                                                                                                                                                                                                                                                                                                                                                                                                                                                                                                                                                                                                                                                                                                                                                                                                                                                                                                                                                                                                                                                                                                                                                                                                                                                                                                                                                                                                                                                                                                                                                                                                                                                                                                                                                                                                                                                                                                                                                                                                                                                                                                                      | Lighthouse Lab in Alderley Park                                                                                                                                                                                     | Wellcome Sanger Institute for the COVID-19 Genomics UK (COG-UK) Consortium                                                                                  | Jacquelyn Wynn, Mairead Hyland, The Lighthouse Lab in Alderley Park and Alex Alderton, Roberto Amato, Sonia Goncalves, Ewan Harrison, David K. Jackson, Ian Johnston, Dominic Kwiatkowski, Cordelia Langford, John Sillitoe on behalf of the Wellcome Sanger Institute COVID-19 Surveillance Team ( <a href="http://www.sanger.ac.uk/covid-team">http://www.sanger.ac.uk/covid-team</a> )                                                                                                                                                                                                                                                                                               |
| EPI_ISL_996402, EPI_ISL_996403, EPI_ISL_996404, EPI_ISL_996405, EPI_ISL_996406, EPI_ISL_996409, EPI_ISL_996410, EPI_ISL_996411, EPI_ISL_996460, EPI_ISL_996461                                                                                                                                                                                                                                                                                                                                                                                                                                                                                                                                                                                                                                                                                                                                                                                                                                                                                                                                                                                                                                                                                                                                                                                                                                                                                                                                                                                                                                                                                                                                                                                                                                                                                                                                                                                                                                                                                                                                                                                                                                                                                                                                                                                                                                                                                                                                                                                                                                                                                                                                                                                                                                                                                                                                                                                                                                                                                                                                                                                                                                                                                                                                                                                                                                                                                                                                                                                                                                                                                                                                                                                                                                                                                                                                                                                                                                                                                                                                                                                 | University of Birmingham                                                                                                                                                                                            | COVID-19 Genomics UK (COG-UK) Consortium                                                                                                                    | Institute of Microbiology, University of Birmingham: Claire McMurray, Joanne Stockton, Samuel Nicholls, Radoslaw Poplawski, Will Rowe, Josh Quick, Nicholas Loman. University of Birmingham Testing Laboratory: Celina M Whalley, Andrew Bosworth, Charlotte Poxon, Kasun Wanigasooriya, Oliver Pickles, Mike Kidd, Alex Richter, Andrew D Beggs PHE Heartlands Lab: Husam Osman, Andrew Bosworth. Queen Elizabeth Hospital: Anna Casey                                                                                                                                                                                                                                                 |
| EPI_ISL_996599, EPI_ISL_996603, EPI_ISL_996676, EPI_ISL_996680, EPI_ISL_996682, EPI_ISL_996686, EPI_ISL_996688, EPI_ISL_996692, EPI_ISL_996738, EPI_ISL_996740                                                                                                                                                                                                                                                                                                                                                                                                                                                                                                                                                                                                                                                                                                                                                                                                                                                                                                                                                                                                                                                                                                                                                                                                                                                                                                                                                                                                                                                                                                                                                                                                                                                                                                                                                                                                                                                                                                                                                                                                                                                                                                                                                                                                                                                                                                                                                                                                                                                                                                                                                                                                                                                                                                                                                                                                                                                                                                                                                                                                                                                                                                                                                                                                                                                                                                                                                                                                                                                                                                                                                                                                                                                                                                                                                                                                                                                                                                                                                                                 | Department of Pathology, University of Cambridge                                                                                                                                                                    | COVID-19 Genomics UK (COG-UK) Consortium                                                                                                                    | Aminu S. Jahun, Yasmin Chaudhry, Iliana Georgana, Myra Hosmillo, Rhys Izuagbe, William L. Hamilton, Martin D. Curran, Surendra Parmar, Ian Goodfellow                                                                                                                                                                                                                                                                                                                                                                                                                                                                                                                                   |
| EPI_ISL_997080, EPI_ISL_997081, EPI_ISL_997082, EPI_ISL_997083, EPI_ISL_997084, EPI_ISL_997085, EPI_ISL_997086, EPI_ISL_997089, EPI_ISL_997090, EPI_ISL_997091, EPI_ISL_997092, EPI_ISL_997093, EPI_ISL_997106, EPI_ISL_997140, EPI_ISL_997141, EPI_ISL_997142, EPI_ISL_997143, EPI_ISL_997144, EPI_ISL_997145, EPI_ISL_997146, EPI_ISL_997147, EPI_ISL_997148                                                                                                                                                                                                                                                                                                                                                                                                                                                                                                                                                                                                                                                                                                                                                                                                                                                                                                                                                                                                                                                                                                                                                                                                                                                                                                                                                                                                                                                                                                                                                                                                                                                                                                                                                                                                                                                                                                                                                                                                                                                                                                                                                                                                                                                                                                                                                                                                                                                                                                                                                                                                                                                                                                                                                                                                                                                                                                                                                                                                                                                                                                                                                                                                                                                                                                                                                                                                                                                                                                                                                                                                                                                                                                                                                                                 |                                                                                                                                                                                                                     |                                                                                                                                                             |                                                                                                                                                                                                                                                                                                                                                                                                                                                                                                                                                                                                                                                                                         |
| see above                                                                                                                                                                                                                                                                                                                                                                                                                                                                                                                                                                                                                                                                                                                                                                                                                                                                                                                                                                                                                                                                                                                                                                                                                                                                                                                                                                                                                                                                                                                                                                                                                                                                                                                                                                                                                                                                                                                                                                                                                                                                                                                                                                                                                                                                                                                                                                                                                                                                                                                                                                                                                                                                                                                                                                                                                                                                                                                                                                                                                                                                                                                                                                                                                                                                                                                                                                                                                                                                                                                                                                                                                                                                                                                                                                                                                                                                                                                                                                                                                                                                                                                                      | Virology Department, Royal Infirmary of Edinburgh, NHS Lothian / School of Biological Sciences, University of Edinburgh                                                                                             | COVID-19 Genomics UK (COG-UK) Consortium                                                                                                                    | McHugh M, Dewar R, Cotton S, Rooke S, O'Toole Á, Scher E, Hill V, McCrone JT, Colquhoun R, Yu X, Jackson B, Rambaut A, Templeton K                                                                                                                                                                                                                                                                                                                                                                                                                                                                                                                                                      |
| EPI_ISL_997251, EPI_ISL_997252, EPI_ISL_997253, EPI_ISL_997254, EPI_ISL_997255, EPI_ISL_997256, EPI_ISL_997257, EPI_ISL_997259, EPI_ISL_997261, EPI_ISL_997262, EPI_ISL_997263, EPI_ISL_997264, EPI_ISL_997265, EPI_ISL_997269, EPI_ISL_997270, EPI_ISL_997271, EPI_ISL_997272, EPI_ISL_997273, EPI_ISL_997275, EPI_ISL_997276, EPI_ISL_997277, EPI_ISL_997278, EPI_ISL_997279, EPI_ISL_997280, EPI_ISL_997281, EPI_ISL_997333, EPI_ISL_997334, EPI_ISL_997335                                                                                                                                                                                                                                                                                                                                                                                                                                                                                                                                                                                                                                                                                                                                                                                                                                                                                                                                                                                                                                                                                                                                                                                                                                                                                                                                                                                                                                                                                                                                                                                                                                                                                                                                                                                                                                                                                                                                                                                                                                                                                                                                                                                                                                                                                                                                                                                                                                                                                                                                                                                                                                                                                                                                                                                                                                                                                                                                                                                                                                                                                                                                                                                                                                                                                                                                                                                                                                                                                                                                                                                                                                                                                 |                                                                                                                                                                                                                     |                                                                                                                                                             |                                                                                                                                                                                                                                                                                                                                                                                                                                                                                                                                                                                                                                                                                         |
| see above                                                                                                                                                                                                                                                                                                                                                                                                                                                                                                                                                                                                                                                                                                                                                                                                                                                                                                                                                                                                                                                                                                                                                                                                                                                                                                                                                                                                                                                                                                                                                                                                                                                                                                                                                                                                                                                                                                                                                                                                                                                                                                                                                                                                                                                                                                                                                                                                                                                                                                                                                                                                                                                                                                                                                                                                                                                                                                                                                                                                                                                                                                                                                                                                                                                                                                                                                                                                                                                                                                                                                                                                                                                                                                                                                                                                                                                                                                                                                                                                                                                                                                                                      | University of Exeter                                                                                                                                                                                                | COVID-19 Genomics UK (COG-UK) Consortium                                                                                                                    | Ben Temperton, Aaron Jeffries, Michelle Michelsen, Joanna Warwick-Dugdale, Audrey Farbos, Robyn Manley, Stephen Michell, Jane Masoli                                                                                                                                                                                                                                                                                                                                                                                                                                                                                                                                                    |
| EPI_ISL_997370                                                                                                                                                                                                                                                                                                                                                                                                                                                                                                                                                                                                                                                                                                                                                                                                                                                                                                                                                                                                                                                                                                                                                                                                                                                                                                                                                                                                                                                                                                                                                                                                                                                                                                                                                                                                                                                                                                                                                                                                                                                                                                                                                                                                                                                                                                                                                                                                                                                                                                                                                                                                                                                                                                                                                                                                                                                                                                                                                                                                                                                                                                                                                                                                                                                                                                                                                                                                                                                                                                                                                                                                                                                                                                                                                                                                                                                                                                                                                                                                                                                                                                                                 | University Hospitals Of Leicester NHS Trust and DeepSeq Nottingham                                                                                                                                                  | COVID-19 Genomics UK (COG-UK) Consortium                                                                                                                    | Christopher Holmes, Paul Bird, Thomas Helmer, Karlie Fallon, Julian Tang, Jonathan Ball, Patrick McClure, Joseph Chappell, Nadine Holmes, Matthew Carlisle, Christopher Moore, Fei Sang, Johnny Debebe, Victoria Wright, Matthew Loose                                                                                                                                                                                                                                                                                                                                                                                                                                                  |
| EPI_ISL_997381, EPI_ISL_997406                                                                                                                                                                                                                                                                                                                                                                                                                                                                                                                                                                                                                                                                                                                                                                                                                                                                                                                                                                                                                                                                                                                                                                                                                                                                                                                                                                                                                                                                                                                                                                                                                                                                                                                                                                                                                                                                                                                                                                                                                                                                                                                                                                                                                                                                                                                                                                                                                                                                                                                                                                                                                                                                                                                                                                                                                                                                                                                                                                                                                                                                                                                                                                                                                                                                                                                                                                                                                                                                                                                                                                                                                                                                                                                                                                                                                                                                                                                                                                                                                                                                                                                 | Liverpool Clinical Laboratories                                                                                                                                                                                     | COVID-19 Genomics UK (COG-UK) Consortium                                                                                                                    | Sam Haldenby, Anita Lucaci, Steve Paterson, Julian Hiscox, Alistair Darby, M Almsaud, A Alrezaihi, Muhannad Alruwaili, Stuart D Armstrong, Jones Benjamin, Eleanor G Bentley, Anu Chawla, Jordan J Clark, Angela Cowell, Richard Eccles, Isabel Garcia-Dorival, Matthew Gemmell, Alessandro Gerada, PKF Gilmore, Richard Gregory, Ximeng Han, Catherine Hartley, Margaret Hughes, Miren Iturriza-Gomara, James Johnson, L Luu, Jenifer Manson, Charlotte Nelson, Elaine O'Toole, Cassie Olateju, Rebekah Penrice-Randal, Lucille Rainbow, N.P Randle, Trevor Ian Robinson, Parul Sharma, Ghada T Shawli, James P Stewart, Neil Swainston, Ecaterina Vamos, Joanne Watts, Mark Whitehead |
| EPI_ISL_997683, EPI_ISL_997684, EPI_ISL_997685, EPI_ISL_997686, EPI_ISL_997688, EPI_ISL_997689, EPI_ISL_997693                                                                                                                                                                                                                                                                                                                                                                                                                                                                                                                                                                                                                                                                                                                                                                                                                                                                                                                                                                                                                                                                                                                                                                                                                                                                                                                                                                                                                                                                                                                                                                                                                                                                                                                                                                                                                                                                                                                                                                                                                                                                                                                                                                                                                                                                                                                                                                                                                                                                                                                                                                                                                                                                                                                                                                                                                                                                                                                                                                                                                                                                                                                                                                                                                                                                                                                                                                                                                                                                                                                                                                                                                                                                                                                                                                                                                                                                                                                                                                                                                                 | University College London, Great Ormond Street Hospital for Children NHS Foundation Trust, Imperial College Healthcare NHS Trust                                                                                    | COVID-19 Genomics UK (COG-UK) Consortium                                                                                                                    | Sergi Castellano, Rachel Williams, Mark Kristiansen, Paola Resende Silva, Sunando Roy, Tony Brooks, Helena Tutill, Paola Niola, Patricia Dyal, Charlotte Williams, Leyssa Forrest, Yasmin Panchbhaya, Jacqueline Findlay, Samuel Weeks, Julianne Brown, Kathryn Harris, Paul Randell, James Price, Alison Holmes, Judith Breuer                                                                                                                                                                                                                                                                                                                                                         |
| EPI_ISL_998181, EPI_ISL_998182, EPI_ISL_998183, EPI_ISL_998184, EPI_ISL_998185, EPI_ISL_998186, EPI_ISL_998187, EPI_ISL_998188, EPI_ISL_998226, EPI_ISL_998227, EPI_ISL_998228, EPI_ISL_998268, EPI_ISL_998270, EPI_ISL_998271, EPI_ISL_998272, EPI_ISL_998273                                                                                                                                                                                                                                                                                                                                                                                                                                                                                                                                                                                                                                                                                                                                                                                                                                                                                                                                                                                                                                                                                                                                                                                                                                                                                                                                                                                                                                                                                                                                                                                                                                                                                                                                                                                                                                                                                                                                                                                                                                                                                                                                                                                                                                                                                                                                                                                                                                                                                                                                                                                                                                                                                                                                                                                                                                                                                                                                                                                                                                                                                                                                                                                                                                                                                                                                                                                                                                                                                                                                                                                                                                                                                                                                                                                                                                                                                 |                                                                                                                                                                                                                     |                                                                                                                                                             |                                                                                                                                                                                                                                                                                                                                                                                                                                                                                                                                                                                                                                                                                         |
| see above                                                                                                                                                                                                                                                                                                                                                                                                                                                                                                                                                                                                                                                                                                                                                                                                                                                                                                                                                                                                                                                                                                                                                                                                                                                                                                                                                                                                                                                                                                                                                                                                                                                                                                                                                                                                                                                                                                                                                                                                                                                                                                                                                                                                                                                                                                                                                                                                                                                                                                                                                                                                                                                                                                                                                                                                                                                                                                                                                                                                                                                                                                                                                                                                                                                                                                                                                                                                                                                                                                                                                                                                                                                                                                                                                                                                                                                                                                                                                                                                                                                                                                                                      | Regional Virus Laboratory, Belfast Health and Social Care Trust                                                                                                                                                     | COVID-19 Genomics UK (COG-UK) Consortium                                                                                                                    | Conall McCaughey, James McKenna, Tanya Curran, Susan Feeney, Alison Watt, Ciara Cox, Mairead Connor, Zoltan Molnar, David Simpson, Derek Fairley                                                                                                                                                                                                                                                                                                                                                                                                                                                                                                                                        |
| EPI_ISL_998448, EPI_ISL_998449, EPI_ISL_998450, EPI_ISL_998451, EPI_ISL_998452, EPI_ISL_998453, EPI_ISL_998454, EPI_ISL_998455, EPI_ISL_998456, EPI_ISL_998457, EPI_ISL_998458, EPI_ISL_998459, EPI_ISL_998460, EPI_ISL_998464, EPI_ISL_998465, EPI_ISL_998466, EPI_ISL_998467, EPI_ISL_998468, EPI_ISL_998469, EPI_ISL_998470, EPI_ISL_998471, EPI_ISL_998472, EPI_ISL_998474, EPI_ISL_998476, EPI_ISL_998477, EPI_ISL_998478, EPI_ISL_998479, EPI_ISL_998480, EPI_ISL_998481, EPI_ISL_998482, EPI_ISL_998483, EPI_ISL_998485, EPI_ISL_998496, EPI_ISL_998499                                                                                                                                                                                                                                                                                                                                                                                                                                                                                                                                                                                                                                                                                                                                                                                                                                                                                                                                                                                                                                                                                                                                                                                                                                                                                                                                                                                                                                                                                                                                                                                                                                                                                                                                                                                                                                                                                                                                                                                                                                                                                                                                                                                                                                                                                                                                                                                                                                                                                                                                                                                                                                                                                                                                                                                                                                                                                                                                                                                                                                                                                                                                                                                                                                                                                                                                                                                                                                                                                                                                                                                 |                                                                                                                                                                                                                     |                                                                                                                                                             |                                                                                                                                                                                                                                                                                                                                                                                                                                                                                                                                                                                                                                                                                         |
| see above                                                                                                                                                                                                                                                                                                                                                                                                                                                                                                                                                                                                                                                                                                                                                                                                                                                                                                                                                                                                                                                                                                                                                                                                                                                                                                                                                                                                                                                                                                                                                                                                                                                                                                                                                                                                                                                                                                                                                                                                                                                                                                                                                                                                                                                                                                                                                                                                                                                                                                                                                                                                                                                                                                                                                                                                                                                                                                                                                                                                                                                                                                                                                                                                                                                                                                                                                                                                                                                                                                                                                                                                                                                                                                                                                                                                                                                                                                                                                                                                                                                                                                                                      | Northumbria University / South Tees Hospitals NHS Foundation Trust / North Cumbria Integrated Care NHS Foundation Trust / North Tees and Hartlepool NHS Foundation Trust / Newcastle Hospitals NHS Foundation Trust | COVID-19 Genomics UK (COG-UK) Consortium                                                                                                                    | Darren L Smith, Andrew Nelson, Matthew Bashton, Greg R Young, Joshua Loh, John Allan, Mohammad A Tariq, Giles S Holt, Gary Black, Wen C Yew, Lynn Dover, Paul Baker, Steve Liggett, Sarah Essex, Jane Greenaway, Debra Padgett, Clive Graham, Garren Scott, Edward Barton, Emma Swindells, Brendan Payne, Jennifer Collins, Yusri Taha, Gary Eltringham                                                                                                                                                                                                                                                                                                                                 |
| EPI_ISL_998831                                                                                                                                                                                                                                                                                                                                                                                                                                                                                                                                                                                                                                                                                                                                                                                                                                                                                                                                                                                                                                                                                                                                                                                                                                                                                                                                                                                                                                                                                                                                                                                                                                                                                                                                                                                                                                                                                                                                                                                                                                                                                                                                                                                                                                                                                                                                                                                                                                                                                                                                                                                                                                                                                                                                                                                                                                                                                                                                                                                                                                                                                                                                                                                                                                                                                                                                                                                                                                                                                                                                                                                                                                                                                                                                                                                                                                                                                                                                                                                                                                                                                                                                 | Quadram Institute Bioscience                                                                                                                                                                                        | COVID-19 Genomics UK (COG-UK) Consortium                                                                                                                    | Dave J. Baker, Gemma L. Kay, Alp Aydin, Thanh Le-Viet, Steven Rudder, Ana P. Tedim, Anastasia Kolyva, Maria Diaz, Leonardo de Oliveira Martins, Nabila-Fareed Alikhan, Lizzie Meadows, Rachael Stanley, Ngozi Elumogo, Muhammed Yasir, Nicholas M. Thomson, Alexander J Trotter, Rachel Gilroy, Samuel Bloomfield, Claire Stuart, Andrew Bell, Reenesha Prakash, Samir Devisevic, Alison E. Mather, John Wain, Mark Webber, Andrew J. Page, Justin O'Grady                                                                                                                                                                                                                              |
| EPI_ISL_998980, EPI_ISL_998981, EPI_ISL_998982, EPI_ISL_998983, EPI_ISL_998984, EPI_ISL_998985                                                                                                                                                                                                                                                                                                                                                                                                                                                                                                                                                                                                                                                                                                                                                                                                                                                                                                                                                                                                                                                                                                                                                                                                                                                                                                                                                                                                                                                                                                                                                                                                                                                                                                                                                                                                                                                                                                                                                                                                                                                                                                                                                                                                                                                                                                                                                                                                                                                                                                                                                                                                                                                                                                                                                                                                                                                                                                                                                                                                                                                                                                                                                                                                                                                                                                                                                                                                                                                                                                                                                                                                                                                                                                                                                                                                                                                                                                                                                                                                                                                 | Lincolnshire Hospitals and DeepSeq Nottingham                                                                                                                                                                       | COVID-19 Genomics UK (COG-UK) Consortium                                                                                                                    | Nichola Duckworth, Tim Sloan, Sarah Walsh, Jonathan Ball, Patrick McClure, Joseph Chappell, Nadine Holmes, Matthew Carlisle, Christopher Moore, Fei Sang, Johnny Debebe, Victoria Wright, Matthew Loose                                                                                                                                                                                                                                                                                                                                                                                                                                                                                 |
| EPI_ISL_998995, EPI_ISL_999227, EPI_ISL_999230, EPI_ISL_999232, EPI_ISL_999233, EPI_ISL_999234, EPI_ISL_999235, EPI_ISL_999238, EPI_ISL_999239, EPI_ISL_999241, EPI_ISL_999242, EPI_ISL_999243, EPI_ISL_999244, EPI_ISL_999245, EPI_ISL_999246, EPI_ISL_999249, EPI_ISL_999251, EPI_ISL_999253, EPI_ISL_999254, EPI_ISL_999256, EPI_ISL_999257, EPI_ISL_999259, EPI_ISL_999262, EPI_ISL_999268, EPI_ISL_999269, EPI_ISL_999273, EPI_ISL_999274, EPI_ISL_999275, EPI_ISL_999276, EPI_ISL_999278, EPI_ISL_999279, EPI_ISL_999281, EPI_ISL_999282, EPI_ISL_999283, EPI_ISL_999284, EPI_ISL_999287, EPI_ISL_999293, EPI_ISL_999296, EPI_ISL_999297, EPI_ISL_999298, EPI_ISL_999299, EPI_ISL_999300, EPI_ISL_999301, EPI_ISL_999314, EPI_ISL_999483, EPI_ISL_999510, EPI_ISL_999511                                                                                                                                                                                                                                                                                                                                                                                                                                                                                                                                                                                                                                                                                                                                                                                                                                                                                                                                                                                                                                                                                                                                                                                                                                                                                                                                                                                                                                                                                                                                                                                                                                                                                                                                                                                                                                                                                                                                                                                                                                                                                                                                                                                                                                                                                                                                                                                                                                                                                                                                                                                                                                                                                                                                                                                                                                                                                                                                                                                                                                                                                                                                                                                                                                                                                                                                                                 |                                                                                                                                                                                                                     |                                                                                                                                                             |                                                                                                                                                                                                                                                                                                                                                                                                                                                                                                                                                                                                                                                                                         |
| see above                                                                                                                                                                                                                                                                                                                                                                                                                                                                                                                                                                                                                                                                                                                                                                                                                                                                                                                                                                                                                                                                                                                                                                                                                                                                                                                                                                                                                                                                                                                                                                                                                                                                                                                                                                                                                                                                                                                                                                                                                                                                                                                                                                                                                                                                                                                                                                                                                                                                                                                                                                                                                                                                                                                                                                                                                                                                                                                                                                                                                                                                                                                                                                                                                                                                                                                                                                                                                                                                                                                                                                                                                                                                                                                                                                                                                                                                                                                                                                                                                                                                                                                                      | Oxford Viromics, NDM, University of Oxford; Oxford University Hospitals; Basingstoke and North Hampshire Hospital                                                                                                   | COVID-19 Genomics UK (COG-UK) Consortium                                                                                                                    | Tanya Golubchik, David Bonsall, George Macintyre, Amy Trebes, Mariateresa de Cesare, Catrin Moore, Alex Mobbs, Anita Justice, Robert Shaw, Monique Andersson, Timothy Peto, Emma Wise, Nathan Moore, Jessica Lynch, Nick Cortes, Matilde Mori, Stephen Kidd, David Buck, John Todd, Christophe Fraser                                                                                                                                                                                                                                                                                                                                                                                   |
