# Supplementary material for: Inferring the Association between the Risk of COVID-19 Case Fatality and N501Y Substitution in SARS-CoV-2
Source: MDPI journal article supplement (doi:10.3390/v13040638), 2021-04-08
Supplement: s1 [file s1]

We gratefully acknowledge the following Authors from the Originating laboratories responsible for obtaining the specimens, as well as the Submitting laboratories where the genome data were generated and shared via GISAID, on which this research is based.

All Submitters of data may be contacted directly via [www.gisaid.org](http://www.gisaid.org)

Authors are sorted alphabetically.

| Accession ID                                                                                                                                                                                                                                                                                                                                                                                                                                                                                                                                                                                                                                                                                                            | Originating Laboratory                                                                                                                                                                                              | Submitting Laboratory                                                      | Authors                                                                                                                                                                                                                                                                                                                                                                                                                                                   |
|-------------------------------------------------------------------------------------------------------------------------------------------------------------------------------------------------------------------------------------------------------------------------------------------------------------------------------------------------------------------------------------------------------------------------------------------------------------------------------------------------------------------------------------------------------------------------------------------------------------------------------------------------------------------------------------------------------------------------|---------------------------------------------------------------------------------------------------------------------------------------------------------------------------------------------------------------------|----------------------------------------------------------------------------|-----------------------------------------------------------------------------------------------------------------------------------------------------------------------------------------------------------------------------------------------------------------------------------------------------------------------------------------------------------------------------------------------------------------------------------------------------------|
| EPI_ISL_1000247, EPI_ISL_1000417, EPI_ISL_1000418, EPI_ISL_1000420, EPI_ISL_1000421, EPI_ISL_1000422, EPI_ISL_1000423, EPI_ISL_1000424, EPI_ISL_1000425, EPI_ISL_1000426, EPI_ISL_1000427, EPI_ISL_1000428, EPI_ISL_1000429, EPI_ISL_1000430, EPI_ISL_1000431, EPI_ISL_1000432, EPI_ISL_1000433, EPI_ISL_1000434, EPI_ISL_1000435, EPI_ISL_1000436, EPI_ISL_1000437, EPI_ISL_1000438, EPI_ISL_1000439, EPI_ISL_1000441, EPI_ISL_1000442, EPI_ISL_1000444, EPI_ISL_1000445, EPI_ISL_1000448, EPI_ISL_1000449                                                                                                                                                                                                             |                                                                                                                                                                                                                     |                                                                            |                                                                                                                                                                                                                                                                                                                                                                                                                                                           |
| see above                                                                                                                                                                                                                                                                                                                                                                                                                                                                                                                                                                                                                                                                                                               | Centre for Enzyme Innovation, University of Portsmouth / Translational Research Laboratory, Portsmouth Hospitals NHS Trust                                                                                          | COVID-19 Genomics UK (COG-UK) Consortium                                   | Angela Beckett,Salman Goudarzi,Christopher Fearn,Kate Cook,Katie Loveson,Sharon Glaysher,Scott Elliott,Samuel Robson                                                                                                                                                                                                                                                                                                                                      |
| EPI_ISL_1000631, EPI_ISL_1000633, EPI_ISL_1000634, EPI_ISL_1000635, EPI_ISL_1000636, EPI_ISL_1000637, EPI_ISL_1000638, EPI_ISL_1000639, EPI_ISL_1000640                                                                                                                                                                                                                                                                                                                                                                                                                                                                                                                                                                 | Department of Pathology, University of Cambridge                                                                                                                                                                    | COVID-19 Genomics UK (COG-UK) Consortium                                   | Aminu S. Jahun, Yasmin Chaudhry, Iliana Georgana, Myra Hosmillo, Rhys Izuagbe, William L. Hamilton, Martin D. Curran, Surendra Parmar, Ian Goodfellow                                                                                                                                                                                                                                                                                                     |
| EPI_ISL_1000811, EPI_ISL_1000884, EPI_ISL_1000889, EPI_ISL_1000890, EPI_ISL_1000899, EPI_ISL_1000901, EPI_ISL_1000904, EPI_ISL_1000912, EPI_ISL_1000936, EPI_ISL_1000938, EPI_ISL_1000939, EPI_ISL_1000941, EPI_ISL_1000942, EPI_ISL_1000944, EPI_ISL_1000946, EPI_ISL_1000948, EPI_ISL_1000949, EPI_ISL_1000950, EPI_ISL_1000951, EPI_ISL_1000952, EPI_ISL_1000953, EPI_ISL_1000954, EPI_ISL_1000955, EPI_ISL_1000956, EPI_ISL_1000957, EPI_ISL_1000958, EPI_ISL_1000959, EPI_ISL_1000961, EPI_ISL_1000962, EPI_ISL_1000965, EPI_ISL_1000966                                                                                                                                                                           |                                                                                                                                                                                                                     |                                                                            |                                                                                                                                                                                                                                                                                                                                                                                                                                                           |
| see above                                                                                                                                                                                                                                                                                                                                                                                                                                                                                                                                                                                                                                                                                                               | Bioinformatics and Biostatistics Lab, Advanced Sequencing Facility                                                                                                                                                  | COVID-19 Genomics UK (COG-UK) Consortium                                   | Aengus Stewart,Jerome Nicod,Chelsea Sawyer,Laura Cubitt,Harshil Patel,Margaret Crawford                                                                                                                                                                                                                                                                                                                                                                   |
| EPI_ISL_1007433                                                                                                                                                                                                                                                                                                                                                                                                                                                                                                                                                                                                                                                                                                         | Lighthouse Lab in Cambridge                                                                                                                                                                                         | Wellcome Sanger Institute for the COVID-19 Genomics UK (COG-UK) Consortium | Rob Howes, The Lighthouse Lab in Cambridge and Alex Alderton, Roberto Amato, Sonia Goncalves, Ewan Harrison, David K. Jackson, Ian Johnston, Dominic Kwiatkowski, Cordelia Langford, John Sillitoe on behalf of the Wellcome Sanger Institute COVID-19 Surveillance Team                                                                                                                                                                                  |
| EPI_ISL_1007575                                                                                                                                                                                                                                                                                                                                                                                                                                                                                                                                                                                                                                                                                                         | Lighthouse Lab in Milton Keynes                                                                                                                                                                                     | Wellcome Sanger Institute for the COVID-19 Genomics UK (COG-UK) Consortium | The Lighthouse Lab in Milton Keynes and Alex Alderton, Roberto Amato, Sonia Goncalves, Ewan Harrison, David K. Jackson, Ian Johnston, Dominic Kwiatkowski, Cordelia Langford, John Sillitoe on behalf of the Wellcome Sanger Institute COVID-19 Surveillance Team                                                                                                                                                                                         |
| EPI_ISL_1007580, EPI_ISL_1007581, EPI_ISL_1007582                                                                                                                                                                                                                                                                                                                                                                                                                                                                                                                                                                                                                                                                       | Lighthouse Lab in Alderley Park                                                                                                                                                                                     | Wellcome Sanger Institute for the COVID-19 Genomics UK (COG-UK) Consortium | Jacquelyn Wynn, Mairead Hyland, The Lighthouse Lab in Alderley Park and Alex Alderton, Roberto Amato, Sonia Goncalves, Ewan Harrison, David K. Jackson, Ian Johnston, Dominic Kwiatkowski, Cordelia Langford, John Sillitoe on behalf of the Wellcome Sanger Institute COVID-19 Surveillance Team                                                                                                                                                         |
| EPI_ISL_1019835                                                                                                                                                                                                                                                                                                                                                                                                                                                                                                                                                                                                                                                                                                         | Lighthouse Lab in Glasgow                                                                                                                                                                                           | Wellcome Sanger Institute for the COVID-19 Genomics UK (COG-UK) Consortium | Harper VanSteenhouse, Yumi Kasai, David Gray, Carol Clugston, Anna Dominiczak and Alex Alderton, Roberto Amato, Jeffrey Barrett, Sonia Goncalves, Ewan Harrison, David K. Jackson, Ian Johnston, Dominic Kwiatkowski, Cordelia Langford, John Sillitoe on behalf of the Wellcome Sanger Institute COVID-19 Surveillance Team                                                                                                                              |
| EPI_ISL_1046996, EPI_ISL_1047060, EPI_ISL_1047063, EPI_ISL_1047068                                                                                                                                                                                                                                                                                                                                                                                                                                                                                                                                                                                                                                                      | University of Birmingham                                                                                                                                                                                            | COVID-19 Genomics UK (COG-UK) Consortium                                   | Institute of Microbiology, University of Birmingham: Claire McMurray, Joanne Stockton, Samuel Nicholls, Radoslaw Poplawski, Will Rowe, Josh Quick, Nicholas Loman. University of Birmingham Testing Laboratory: Celina M Whalley, Andrew Bosworth, Charlotte Poxon, Kasun Wanigasooriya, Oliver Pickles, Mike Kidd, Alex Richter, Andrew D Beggs PHE Heartlands Lab: Husam Osman, Andrew Bosworth. Queen Elizabeth Hospital: Anna Casey                   |
| EPI_ISL_1047839, EPI_ISL_1047840                                                                                                                                                                                                                                                                                                                                                                                                                                                                                                                                                                                                                                                                                        | West of Scotland Specialist Virology Centre, NHSGGC / MRC-University of Glasgow Centre for Virus Research                                                                                                           | COVID-19 Genomics UK (COG-UK) Consortium                                   | Ana da Silva Filipe, Natasha Johnson, Kathy Smollett, Daniel Mair, Stephen Carmichael, Alice Broos, Lily Tong, Jenna Nichols, Kyriaki Nomikou; Sarah McDonald; Richard Orton, Joseph Hughes, Sreenu Vattipally, David L Robertson; Alasdair MacLean, Rory Gunson; Sharif Shaaban, Matthew Holden; Rachel Blacow, Guy Mollett, Kathy Li, James Shepherd, Antonia Ho, Emma Thomson                                                                          |
| EPI_ISL_1048051, EPI_ISL_1048052                                                                                                                                                                                                                                                                                                                                                                                                                                                                                                                                                                                                                                                                                        | University College London, Great Ormond Street Hospital for Children NHS Foundation Trust, Imperial College Healthcare NHS Trust                                                                                    | COVID-19 Genomics UK (COG-UK) Consortium                                   | Sergi Castellano, Rachel Williams, Mark Kristiansen, Paola Resende Silva, Sunando Roy, Tony Brooks, Helena Tutill, Paola Niola, Patricia Dyal, Charlotte Williams, Leysa Forrest, Yasmin Panchbhaya, Jacqueline Findlay, Samuel Weeks, Julianne Brown, Kathryn Harris, Paul Randell, James Price, Alison Holmes, Judith Breuer                                                                                                                            |
| EPI_ISL_1048071, EPI_ISL_1048088                                                                                                                                                                                                                                                                                                                                                                                                                                                                                                                                                                                                                                                                                        | Barts Health NHS Trust                                                                                                                                                                                              | COVID-19 Genomics UK (COG-UK) Consortium                                   | CUTINO-MOQUEL, Maria-Teresa; HARRINGTON, David; OWOYEMI, Dola; KULASEGARAN-SHYLINI, Raghavendran; BROAD, Claire; KELE, Beatrix                                                                                                                                                                                                                                                                                                                            |
| EPI_ISL_1048136, EPI_ISL_1048137, EPI_ISL_1050357, EPI_ISL_1050439, EPI_ISL_1050440, EPI_ISL_1050441, EPI_ISL_1050442, EPI_ISL_1050443, EPI_ISL_1050444, EPI_ISL_1050445, EPI_ISL_1050446, EPI_ISL_1050447, EPI_ISL_1050448, EPI_ISL_1050450, EPI_ISL_1050451, EPI_ISL_1050457, EPI_ISL_1050458, EPI_ISL_1050459, EPI_ISL_1050460, EPI_ISL_1050461, EPI_ISL_1050462, EPI_ISL_1050464, EPI_ISL_1050465, EPI_ISL_1050466, EPI_ISL_1050508, EPI_ISL_1050510, EPI_ISL_1050511, EPI_ISL_1050516, EPI_ISL_1050517, EPI_ISL_1050519, EPI_ISL_1050520, EPI_ISL_1050521, EPI_ISL_1050524, EPI_ISL_1050525                                                                                                                        |                                                                                                                                                                                                                     |                                                                            |                                                                                                                                                                                                                                                                                                                                                                                                                                                           |
| see above                                                                                                                                                                                                                                                                                                                                                                                                                                                                                                                                                                                                                                                                                                               | University College London, Great Ormond Street Hospital for Children NHS Foundation Trust, Imperial College Healthcare NHS Trust                                                                                    | COVID-19 Genomics UK (COG-UK) Consortium                                   | Sergi Castellano, Rachel Williams, Mark Kristiansen, Paola Resende Silva, Sunando Roy, Tony Brooks, Helena Tutill, Paola Niola, Patricia Dyal, Charlotte Williams, Leysa Forrest, Yasmin Panchbhaya, Jacqueline Findlay, Samuel Weeks, Julianne Brown, Kathryn Harris, Paul Randell, James Price, Alison Holmes, Judith Breuer                                                                                                                            |
| EPI_ISL_1050949, EPI_ISL_1050951, EPI_ISL_1050952, EPI_ISL_1050953, EPI_ISL_1050954, EPI_ISL_1050955, EPI_ISL_1050956, EPI_ISL_1050960, EPI_ISL_1050992, EPI_ISL_1051213, EPI_ISL_1051215, EPI_ISL_1051216, EPI_ISL_1051218, EPI_ISL_1051219, EPI_ISL_1051411                                                                                                                                                                                                                                                                                                                                                                                                                                                           |                                                                                                                                                                                                                     |                                                                            |                                                                                                                                                                                                                                                                                                                                                                                                                                                           |
| see above                                                                                                                                                                                                                                                                                                                                                                                                                                                                                                                                                                                                                                                                                                               | Northumbria University / South Tees Hospitals NHS Foundation Trust / North Cumbria Integrated Care NHS Foundation Trust / North Tees and Hartlepool NHS Foundation Trust / Newcastle Hospitals NHS Foundation Trust | COVID-19 Genomics UK (COG-UK) Consortium                                   | Darren L Smith,Andrew Nelson,Matthew Bashton,Greg R Young,Joshua Loh,John Allan,Mohammad A Tariq,Giles S Holt,Gary Black,Wen C Yew,Lynn Dover,Paul Baker,Steve Liggett,Sarah Essex,Jane Greenaway,Debra Padgett,Clive Graham,Garren Scott,Edward Barton,Emma Swindells,Brendan Payne,Jennifer Collins,Yusri Taha,Gary Eltringham                                                                                                                          |
| EPI_ISL_1051427, EPI_ISL_1051430, EPI_ISL_1051447, EPI_ISL_1051449, EPI_ISL_1051454, EPI_ISL_1051456, EPI_ISL_1051469, EPI_ISL_1051474, EPI_ISL_1051477, EPI_ISL_1051478, EPI_ISL_1051493, EPI_ISL_1051494, EPI_ISL_1051495, EPI_ISL_1051497, EPI_ISL_1051500, EPI_ISL_1051515                                                                                                                                                                                                                                                                                                                                                                                                                                          |                                                                                                                                                                                                                     |                                                                            |                                                                                                                                                                                                                                                                                                                                                                                                                                                           |
| see above                                                                                                                                                                                                                                                                                                                                                                                                                                                                                                                                                                                                                                                                                                               | Quadram Institute Bioscience                                                                                                                                                                                        | COVID-19 Genomics UK (COG-UK) Consortium                                   | Dave J. Baker, Gemma L. Kay, Alp Aydin, Thanh Le-Viet, Steven Rudder, Ana P. Tedim, Anastasia Kolyva, Maria Diaz, Leonardo de Oliveira Martins, Nabil-Fareed Alikhan, Lizzie Meadows, Rachael Stanley, Ngozi Elumogo, Muhammed Yasir, Nicholas M. Thomson, Alexander J. Trotter, Rachel Gilroy, Samuel Bloomfield, Claire Stuart, Andrew Bell, Reenesh Prakash, Samir Devisevic, Alison E. Mather, John Wain, Mark Webber, Andrew J. Page, Justin O'Grady |
| EPI_ISL_1051788, EPI_ISL_1051790, EPI_ISL_1051794, EPI_ISL_1051797, EPI_ISL_1051798, EPI_ISL_1051799, EPI_ISL_1051800, EPI_ISL_1051801, EPI_ISL_1051802, EPI_ISL_1051803, EPI_ISL_1051805, EPI_ISL_1051806, EPI_ISL_1051807, EPI_ISL_1051808, EPI_ISL_1051809, EPI_ISL_1051813, EPI_ISL_1051814, EPI_ISL_1051816, EPI_ISL_1051822, EPI_ISL_1051824, EPI_ISL_1051825, EPI_ISL_1051826, EPI_ISL_1051827, EPI_ISL_1051829, EPI_ISL_1051832, EPI_ISL_1051838, EPI_ISL_1051840, EPI_ISL_1051841, EPI_ISL_1051843, EPI_ISL_1051844, EPI_ISL_1051845, EPI_ISL_1051849, EPI_ISL_1051851, EPI_ISL_1051852, EPI_ISL_1051853, EPI_ISL_1051854, EPI_ISL_1051855, EPI_ISL_1051856, EPI_ISL_1051858, EPI_ISL_1051873, EPI_ISL_1051874 |                                                                                                                                                                                                                     |                                                                            |                                                                                                                                                                                                                                                                                                                                                                                                                                                           |
| see above                                                                                                                                                                                                                                                                                                                                                                                                                                                                                                                                                                                                                                                                                                               | Oxford Viromics, NDM, University of Oxford: Oxford University Hospitals; Basingstoke and North Hampshire Hospital                                                                                                   | COVID-19 Genomics UK (COG-UK) Consortium                                   | Tanya Golubchik, David Bonsall, George Macintyre, Amy Trebes, Mariateresa de Cesare, Catrin Moore, Alex Mobbs, Anita Justice, Robert Shaw, Monique Andersson, Timothy Peto, Emma Wise, Nathan Moore, Jessica Lynch, Nick Cortes, Matilde Mori, Stephen Kidd, David Buck, John Todd, Christophe Fraser                                                                                                                                                     |
| EPI_ISL_1053817, EPI_ISL_1053818, EPI_ISL_1053819                                                                                                                                                                                                                                                                                                                                                                                                                                                                                                                                                                                                                                                                       | Centre for Enzyme Innovation, University of Portsmouth / Translational Research Laboratory, Portsmouth Hospitals NHS Trust                                                                                          | COVID-19 Genomics UK (COG-UK) Consortium                                   | Angela Beckett,Salman Goudarzi,Christopher Fearn,Kate Cook,Katie Loveson,Sharon Glaysher,Scott Elliott,Samuel Robson                                                                                                                                                                                                                                                                                                                                      |
| EPI_ISL_1054792, EPI_ISL_1054794, EPI_ISL_1054796, EPI_ISL_1054798, EPI_ISL_1054801, EPI_ISL_1054803, EPI_ISL_1054804, EPI_ISL_1054805, EPI_ISL_1054806, EPI_ISL_1054807, EPI_ISL_1054809, EPI_ISL_1054810, EPI_ISL_1054811, EPI_ISL_1054812, EPI_ISL_1054813, EPI_ISL_1054814, EPI_ISL_1054816, EPI_ISL_1054817, EPI_ISL_1054819, EPI_ISL_1054821                                                                                                                                                                                                                                                                                                                                                                      |                                                                                                                                                                                                                     |                                                                            |                                                                                                                                                                                                                                                                                                                                                                                                                                                           |
| see above                                                                                                                                                                                                                                                                                                                                                                                                                                                                                                                                                                                                                                                                                                               | Bioinformatics and Biostatistics Lab, Advanced Sequencing Facility                                                                                                                                                  | COVID-19 Genomics UK (COG-UK) Consortium                                   | Aengus Stewart,Jerome Nicod,Chelsea Sawyer,Laura Cubitt,Harshil Patel,Margaret Crawford                                                                                                                                                                                                                                                                                                                                                                   |
| EPI_ISL_1101110                                                                                                                                                                                                                                                                                                                                                                                                                                                                                                                                                                                                                                                                                                         | Lighthouse Lab in Alderley Park                                                                                                                                                                                     | Wellcome Sanger Institute for the COVID-19 Genomics UK (COG-UK) Consortium | Jacquelyn Wynn, Mairead Hyland, The Lighthouse Lab in Alderley Park and Alex Alderton, Roberto Amato, Jeffrey Barrett, Sonia Goncalves, Ewan Harrison, David K. Jackson, Ian Johnston, Dominic Kwiatkowski, Cordelia Langford, John Sillitoe on behalf of the Wellcome Sanger Institute COVID-19 Surveillance Team                                                                                                                                        |

|                                                                                                                                                                                                                                                                                                                                                                                                                                                                                                                                                                                                                                                                                                                                                                                                                                                                                                                    |                                                                                                                                                                                                                     |                                          |                                                                                                                                                                                                                                                                                                                                                                                                                                                                                                                                                                                                                                                                                                            |
|--------------------------------------------------------------------------------------------------------------------------------------------------------------------------------------------------------------------------------------------------------------------------------------------------------------------------------------------------------------------------------------------------------------------------------------------------------------------------------------------------------------------------------------------------------------------------------------------------------------------------------------------------------------------------------------------------------------------------------------------------------------------------------------------------------------------------------------------------------------------------------------------------------------------|---------------------------------------------------------------------------------------------------------------------------------------------------------------------------------------------------------------------|------------------------------------------|------------------------------------------------------------------------------------------------------------------------------------------------------------------------------------------------------------------------------------------------------------------------------------------------------------------------------------------------------------------------------------------------------------------------------------------------------------------------------------------------------------------------------------------------------------------------------------------------------------------------------------------------------------------------------------------------------------|
| EPI_ISL_1104232, EPI_ISL_1104238, EPI_ISL_1104241, EPI_ISL_1104257                                                                                                                                                                                                                                                                                                                                                                                                                                                                                                                                                                                                                                                                                                                                                                                                                                                 | Virology Department, Royal Infirmary of Edinburgh, NHS Lothian / School of Biological Sciences, University of Edinburgh                                                                                             | COVID-19 Genomics UK (COG-UK) Consortium | McHugh M, Dewar R, Cotton S, Rooke S, O'Toole Á, Scher E, Hill V, McCrone JT, Colquhoun R, Yu X, Jackson B, Rambaut A, Templeton K                                                                                                                                                                                                                                                                                                                                                                                                                                                                                                                                                                         |
| EPI_ISL_1104291, EPI_ISL_1104293, EPI_ISL_1104296                                                                                                                                                                                                                                                                                                                                                                                                                                                                                                                                                                                                                                                                                                                                                                                                                                                                  | University Hospitals Of Leicester NHS Trust and DeepSeq Nottingham                                                                                                                                                  | COVID-19 Genomics UK (COG-UK) Consortium | Christopher Holmes, Paul Bird, Thomas Helmer, Karlie Fallon, Julian Tang, Jonathan Ball, Patrick McClure, Joseph Chappell, Nadine Holmes, Matthew Carlisle, Christopher Moore, Fei Sang, Johnny Debebe, Victoria Wright, Matthew Loose                                                                                                                                                                                                                                                                                                                                                                                                                                                                     |
| EPI_ISL_1104321, EPI_ISL_1104333, EPI_ISL_1104334, EPI_ISL_1104335, EPI_ISL_1104336, EPI_ISL_1104362, EPI_ISL_1104367, EPI_ISL_1104368, EPI_ISL_1104388                                                                                                                                                                                                                                                                                                                                                                                                                                                                                                                                                                                                                                                                                                                                                            | Liverpool Clinical Laboratories                                                                                                                                                                                     | COVID-19 Genomics UK (COG-UK) Consortium | Sam Haldenby, Anita Lucaci, Steve Paterson, Julian Hiscox, Alistair Darby, M Almsaud, A Alrezaihi, Muhannad Alruwaili, Stuart D Armstrong, Jones Benjamin, Eleanor G Bentley, Anu Chawla, Jordan J Clark, Angela Cowell, Richard Eccles, Isabel Garcia-Dorival, Matthew Gemmell, Alessandro Gerada, PKF Gilmore, Richard Gregory, Ximeng Han, Catherine Hartley, Margaret Hughes, Miren Iturriza-Gomara, James Johnson, L Luu, Jenifer Manson, Charlotte Nelson, Elaine O'Toole, Cassie Olateju, Rebekah Penrice-Randal , Lucille Rainbow, N.P Randle, Trevor Ian Robinson, Parul Sharma, Ghada T Shawli, James P Stewart, Neil Swainston, Ecaterina Vamos, Joanne Watts, Mark Whitehead                   |
| EPI_ISL_1105149, EPI_ISL_1105157, EPI_ISL_1105266, EPI_ISL_1105272, EPI_ISL_1105289, EPI_ISL_1105333                                                                                                                                                                                                                                                                                                                                                                                                                                                                                                                                                                                                                                                                                                                                                                                                               | University College London Hospital                                                                                                                                                                                  | COVID-19 Genomics UK (COG-UK) Consortium | Judith Heaney, Matthew Byott, Catherine Houlihan, Dan Frampton, Stuart Kirk, Moira Spyer and Eleni Nastouli                                                                                                                                                                                                                                                                                                                                                                                                                                                                                                                                                                                                |
| EPI_ISL_1107750                                                                                                                                                                                                                                                                                                                                                                                                                                                                                                                                                                                                                                                                                                                                                                                                                                                                                                    | Centre for Enzyme Innovation, University of Portsmouth / Translational Research Laboratory, Portsmouth Hospitals NHS Trust                                                                                          | COVID-19 Genomics UK (COG-UK) Consortium | Angela Beckett, Salman Goudarzi, Christopher Fearn, Kate Cook, Katie Loveson, Sharon Glaysher, Scott Elliott, Samuel Robson                                                                                                                                                                                                                                                                                                                                                                                                                                                                                                                                                                                |
| EPI_ISL_1177878                                                                                                                                                                                                                                                                                                                                                                                                                                                                                                                                                                                                                                                                                                                                                                                                                                                                                                    | Liverpool Clinical Laboratories                                                                                                                                                                                     | COVID-19 Genomics UK (COG-UK) Consortium | Sam Haldenby, Alistair Darby, Steve Paterson, Anita Lucaci, Julian Hiscox, M Almsaud, A Alrezaihi, Muhannad Alruwaili, Stuart D Armstrong, Jones Benjamin, Eleanor G Bentley, Anu Chawla, Jordan J Clark, Angela Cowell, Richard Eccles, Isabel Garcia-Dorival, Matthew Gemmell, Alessandro Gerada, PKF Gilmore, Richard Gregory, Ximeng Han, Catherine Hartley, Margaret Hughes, Miren Iturriza-Gomara, James Johnson, L Luu, Jenifer Manson, Charlotte Nelson, Elaine O'Toole, Cassie Olateju, Rebekah Penrice-Randal , Lucille Rainbow, N.P Randle, Trevor Ian Robinson, Parul Sharma, Ghada T Shawli, James P Stewart, Neil Swainston, Ecaterina Vamos, Joanne Watts, Mark Whitehead, Hermione Webster |
| EPI_ISL_1177999                                                                                                                                                                                                                                                                                                                                                                                                                                                                                                                                                                                                                                                                                                                                                                                                                                                                                                    | Barts Health NHS Trust                                                                                                                                                                                              | COVID-19 Genomics UK (COG-UK) Consortium | CUTINO-MOQUEL, Maria-Teresa; HARRINGTON, David; OWOYEMI, Dola; KULASEGARAN-SHYLINI, Raghavendran; BROAD, Claire; KELE, Beatrix                                                                                                                                                                                                                                                                                                                                                                                                                                                                                                                                                                             |
| EPI_ISL_1178009                                                                                                                                                                                                                                                                                                                                                                                                                                                                                                                                                                                                                                                                                                                                                                                                                                                                                                    | University College London, Great Ormond Street Hospital for Children NHS Foundation Trust, Imperial College Healthcare NHS Trust                                                                                    | COVID-19 Genomics UK (COG-UK) Consortium | Sergi Castellano, Rachel Williams, Mark Kristiansen, Paola Resende Silva, Sunando Roy, Tony Brooks, Helena Tutill, Paola Niola, Patricia Dyal, Charlotte Williams, Leysa Forrest, Yasmin Panchbhaya, Jacqueline Findlay, Samuel Weeks, Julianne Brown, Kathryn Harris, Paul Randell, James Price, Alison Holmes, Judith Breuer                                                                                                                                                                                                                                                                                                                                                                             |
| EPI_ISL_1178262, EPI_ISL_1178343, EPI_ISL_1178349, EPI_ISL_1178350, EPI_ISL_1178351, EPI_ISL_1178352, EPI_ISL_1178354, EPI_ISL_1178355, EPI_ISL_1178358, EPI_ISL_1178360, EPI_ISL_1178407, EPI_ISL_1178408, EPI_ISL_1178409, EPI_ISL_1178410, EPI_ISL_1178411, EPI_ISL_1178412, EPI_ISL_1178413, EPI_ISL_1178414, EPI_ISL_1178415, EPI_ISL_1178416                                                                                                                                                                                                                                                                                                                                                                                                                                                                                                                                                                 | see above                                                                                                                                                                                                           | COVID-19 Genomics UK (COG-UK) Consortium | Darren L Smith, Andrew Nelson, Matthew Bashton, Greg R Young, Joshua Loh, John Allan, Mohammad A Tariq, Giles S Holt, Gary Black, Wen C Yew, Lynn Dover, Paul Baker, Steve Liggett, Sarah Essex, Jane Greenaway, Debra Padgett, Clive Graham, Garren Scott, Edward Barton, Emma Swindells, Brendan Payne, Jennifer Collins, Yusri Taha, Gary Eltringham                                                                                                                                                                                                                                                                                                                                                    |
| EPI_ISL_1178590                                                                                                                                                                                                                                                                                                                                                                                                                                                                                                                                                                                                                                                                                                                                                                                                                                                                                                    | Northumbria University / South Tees Hospitals NHS Foundation Trust / North Cumbria Integrated Care NHS Foundation Trust / North Tees and Hartlepool NHS Foundation Trust / Newcastle Hospitals NHS Foundation Trust | COVID-19 Genomics UK (COG-UK) Consortium | Gemma Clark, Wendy Smith, Manjinder Khakh, Vicki M Fleming, Michelle M Lister, Hannah Howson-Wells, Jonathan Ball, Timothy Byaruhanga, Jayasree Dey, Emily Park, Jack Hill, Patrick McClure, Joseph Chappell, Theocharis Tsoleridis, Nadine Holmes, Matthew Carlisle, Christopher Moore, Fei Sang, Johnny Debebe, Victoria Wright, Matthew Loose                                                                                                                                                                                                                                                                                                                                                           |
| EPI_ISL_1178720, EPI_ISL_1178726, EPI_ISL_1178746, EPI_ISL_1178749, EPI_ISL_1178777, EPI_ISL_1178778, EPI_ISL_1178783, EPI_ISL_1178801, EPI_ISL_1178858                                                                                                                                                                                                                                                                                                                                                                                                                                                                                                                                                                                                                                                                                                                                                            | Oxford Viromics, NDM, University of Oxford: Oxford University Hospitals; Basingstoke and North Hampshire Hospital                                                                                                   | COVID-19 Genomics UK (COG-UK) Consortium | Tanya Golubchik, David Bonsall, George Macintyre, Amy Trebes, Mariateresa de Cesare, Catrin Moore, Alex Mobbs, Anita Justice, Robert Shaw, Monique Andersson, Timothy Peto, Emma Wise, Nathan Moore, Jessica Lynch, Nick Cortes, Matilde Mori, Stephen Kidd, David Buck, John Todd, Christophe Fraser                                                                                                                                                                                                                                                                                                                                                                                                      |
| EPI_ISL_1179792, EPI_ISL_1179825                                                                                                                                                                                                                                                                                                                                                                                                                                                                                                                                                                                                                                                                                                                                                                                                                                                                                   | Centre for Enzyme Innovation, University of Portsmouth / Translational Research Laboratory, Portsmouth Hospitals NHS Trust                                                                                          | COVID-19 Genomics UK (COG-UK) Consortium | Angela Beckett, Salman Goudarzi, Christopher Fearn, Kate Cook, Katie Loveson, Sharon Glaysher, Scott Elliott, Samuel Robson                                                                                                                                                                                                                                                                                                                                                                                                                                                                                                                                                                                |
| EPI_ISL_1247571, EPI_ISL_1247573, EPI_ISL_1247574, EPI_ISL_1247576, EPI_ISL_1247578, EPI_ISL_1247580, EPI_ISL_1247581, EPI_ISL_1247582, EPI_ISL_1247583, EPI_ISL_1247584, EPI_ISL_1247585, EPI_ISL_1247586, EPI_ISL_1247587, EPI_ISL_1247588, EPI_ISL_1247589, EPI_ISL_1247590, EPI_ISL_1247591, EPI_ISL_1247592, EPI_ISL_1247595, EPI_ISL_1247596, EPI_ISL_1247597, EPI_ISL_1247598, EPI_ISL_1247599                                                                                                                                                                                                                                                                                                                                                                                                                                                                                                              | see above                                                                                                                                                                                                           | COVID-19 Genomics UK (COG-UK) Consortium | Aminu S. Jahun, Yasmin Chaudhry, Iliana Georgana, Myra Hosmillo, Rhys Izuagbe, William L. Hamilton, Martin D. Curran, Surendra Parmar, Ian Goodfellow                                                                                                                                                                                                                                                                                                                                                                                                                                                                                                                                                      |
| EPI_ISL_1247720, EPI_ISL_1247724                                                                                                                                                                                                                                                                                                                                                                                                                                                                                                                                                                                                                                                                                                                                                                                                                                                                                   | Department of Pathology, University of Cambridge                                                                                                                                                                    | COVID-19 Genomics UK (COG-UK) Consortium | McHugh M, Dewar R, Cotton S, Rooke S, O'Toole Á, Scher E, Hill V, McCrone JT, Colquhoun R, Yu X, Jackson B, Rambaut A, Templeton K                                                                                                                                                                                                                                                                                                                                                                                                                                                                                                                                                                         |
| EPI_ISL_1248107, EPI_ISL_1248108, EPI_ISL_1248109, EPI_ISL_1248110, EPI_ISL_1248111, EPI_ISL_1248112, EPI_ISL_1248114, EPI_ISL_1248115, EPI_ISL_1248116, EPI_ISL_1248122, EPI_ISL_1248123, EPI_ISL_1248124, EPI_ISL_1248125, EPI_ISL_1248126, EPI_ISL_1248127, EPI_ISL_1248128, EPI_ISL_1248129, EPI_ISL_1248130, EPI_ISL_1248131, EPI_ISL_1248132, EPI_ISL_1248133, EPI_ISL_1248134, EPI_ISL_1248135, EPI_ISL_1248136, EPI_ISL_1248137, EPI_ISL_1248138, EPI_ISL_1248139, EPI_ISL_1248140, EPI_ISL_1248141, EPI_ISL_1248142, EPI_ISL_1248143, EPI_ISL_1248144, EPI_ISL_1248145, EPI_ISL_1248146, EPI_ISL_1248147, EPI_ISL_1248148, EPI_ISL_1248151, EPI_ISL_1248152, EPI_ISL_1248156, EPI_ISL_1248158, EPI_ISL_1248164, EPI_ISL_1248165, EPI_ISL_1248173, EPI_ISL_1248174, EPI_ISL_1248175, EPI_ISL_1248181, EPI_ISL_1248182, EPI_ISL_1248184, EPI_ISL_1248191, EPI_ISL_1248193, EPI_ISL_1248203, EPI_ISL_1248205 | Virology Department, Royal Infirmary of Edinburgh, NHS Lothian / School of Biological Sciences, University of Edinburgh                                                                                             | COVID-19 Genomics UK (COG-UK) Consortium | Sergi Castellano, Rachel Williams, Mark Kristiansen, Paola Resende Silva, Sunando Roy, Tony Brooks, Helena Tutill, Paola Niola, Patricia Dyal, Charlotte Williams, Leysa Forrest, Yasmin Panchbhaya, Jacqueline Findlay, Samuel Weeks, Julianne Brown, Kathryn Harris, Paul Randell, James Price, Alison Holmes, Judith Breuer                                                                                                                                                                                                                                                                                                                                                                             |
| see above                                                                                                                                                                                                                                                                                                                                                                                                                                                                                                                                                                                                                                                                                                                                                                                                                                                                                                          | University College London, Great Ormond Street Hospital for Children NHS Foundation Trust, Imperial College Healthcare NHS Trust                                                                                    | COVID-19 Genomics UK (COG-UK) Consortium | Dr Judith Heaney, Matthew Byott, Dr Catherine Houlihan, Dr Daniel Frampton, Stuart Kirk, Dr Moira Spyer, Dr Paul Grant and Dr Eleni Nastouli                                                                                                                                                                                                                                                                                                                                                                                                                                                                                                                                                               |
| EPI_ISL_1248372, EPI_ISL_1248373, EPI_ISL_1248382, EPI_ISL_1248383, EPI_ISL_1248394, EPI_ISL_1248406, EPI_ISL_1248417, EPI_ISL_1248438, EPI_ISL_1248439, EPI_ISL_1248482                                                                                                                                                                                                                                                                                                                                                                                                                                                                                                                                                                                                                                                                                                                                           | University College London Hospital                                                                                                                                                                                  | COVID-19 Genomics UK (COG-UK) Consortium |                                                                                                                                                                                                                                                                                                                                                                                                                                                                                                                                                                                                                                                                                                            |
| EPI_ISL_1248990, EPI_ISL_1249057                                                                                                                                                                                                                                                                                                                                                                                                                                                                                                                                                                                                                                                                                                                                                                                                                                                                                   | Quadram Institute Bioscience                                                                                                                                                                                        | COVID-19 Genomics UK (COG-UK) Consortium | Dave J. Baker, Gemma L. Kay, Alp Aydin, Thanh Le-Viet, Steven Rudder, Ana P. Tedim, Anastasia Kolyva, Maria Diaz, Leonardo de Oliveira Martins, Nabil-Fareed Alikhan, Lizzie Meadows, Rachael Stanley, Ngozi Elumogo, Muhammed Yasir, Nicholas M. Thomson, Alexander J Trotter, Rachel Gilroy, Samuel Bloomfield, Claire Stuart, Andrew Bell, Reenesh Prakash, Samir Dervisevic, Alison E. Mather, John Wain, Mark Webber, Andrew J. Page, Justin O'Grady                                                                                                                                                                                                                                                  |
| EPI_ISL_1249242, EPI_ISL_1249244                                                                                                                                                                                                                                                                                                                                                                                                                                                                                                                                                                                                                                                                                                                                                                                                                                                                                   | Oxford Viromics, NDM, University of Oxford: Oxford University Hospitals; Basingstoke and North Hampshire Hospital                                                                                                   | COVID-19 Genomics UK (COG-UK) Consortium | Tanya Golubchik, David Bonsall, George Macintyre, Amy Trebes, Mariateresa de Cesare, Catrin Moore, Alex Mobbs, Anita Justice, Robert Shaw, Monique Andersson, Timothy Peto, Emma Wise, Nathan Moore, Jessica Lynch, Nick Cortes, Matilde Mori, Stephen Kidd, David Buck, John Todd, Christophe Fraser                                                                                                                                                                                                                                                                                                                                                                                                      |
| EPI_ISL_1296524, EPI_ISL_1296528, EPI_ISL_1296529, EPI_ISL_1296533, EPI_ISL_1296534, EPI_ISL_1296535, EPI_ISL_1296538, EPI_ISL_1296547, EPI_ISL_1296548, EPI_ISL_1296551, EPI_ISL_1296571                                                                                                                                                                                                                                                                                                                                                                                                                                                                                                                                                                                                                                                                                                                          | see above                                                                                                                                                                                                           | COVID-19 Genomics UK (COG-UK) Consortium | PHE Covid Sequencing Team                                                                                                                                                                                                                                                                                                                                                                                                                                                                                                                                                                                                                                                                                  |
| EPI_ISL_1308578, EPI_ISL_1308587, EPI_ISL_1308589, EPI_ISL_1308590, EPI_ISL_1308591                                                                                                                                                                                                                                                                                                                                                                                                                                                                                                                                                                                                                                                                                                                                                                                                                                | Respiratory Virus Unit, National Infection Service, Public Health England                                                                                                                                           | COVID-19 Genomics UK (COG-UK) Consortium |                                                                                                                                                                                                                                                                                                                                                                                                                                                                                                                                                                                                                                                                                                            |
| EPI_ISL_1309051, EPI_ISL_1309070, EPI_ISL_1309077, EPI_ISL_1309078, EPI_ISL_1309085, EPI_ISL_1309090, EPI_ISL_1309097, EPI_ISL_1309099, EPI_ISL_1309103, EPI_ISL_1309109, EPI_ISL_1309113, EPI_ISL_1386855, EPI_ISL_1386856, EPI_ISL_1386859, EPI_ISL_1386873, EPI_ISL_1386895                                                                                                                                                                                                                                                                                                                                                                                                                                                                                                                                                                                                                                     | University of Exeter                                                                                                                                                                                                | COVID-19 Genomics UK (COG-UK) Consortium | Ben Temperton, Aaron Jeffries, Michelle Michelsen, Joanna Warwick-Dugdale, Audrey Farbos, Robyn Manley, Stephen Michell, Jane Masoli                                                                                                                                                                                                                                                                                                                                                                                                                                                                                                                                                                       |
| see above                                                                                                                                                                                                                                                                                                                                                                                                                                                                                                                                                                                                                                                                                                                                                                                                                                                                                                          | University College London, Great Ormond Street Hospital for                                                                                                                                                         | COVID-19 Genomics UK (COG-UK) Consortium | Sergi Castellano, Rachel Williams, Mark Kristiansen, Paola Resende Silva, Sunando Roy, Tony Brooks, Helena Tutill, Paola Niola, Patricia Dyal, Charlotte                                                                                                                                                                                                                                                                                                                                                                                                                                                                                                                                                   |

|                                                                                                                                                                                                                                                                                                 |                                                                                                                                                                                                                     |                                                                            |                                                                                                                                                                                                                                                                                                                                                                                                                                         |
|-------------------------------------------------------------------------------------------------------------------------------------------------------------------------------------------------------------------------------------------------------------------------------------------------|---------------------------------------------------------------------------------------------------------------------------------------------------------------------------------------------------------------------|----------------------------------------------------------------------------|-----------------------------------------------------------------------------------------------------------------------------------------------------------------------------------------------------------------------------------------------------------------------------------------------------------------------------------------------------------------------------------------------------------------------------------------|
|                                                                                                                                                                                                                                                                                                 | Children NHS Foundation Trust, Imperial College Healthcare NHS Trust                                                                                                                                                |                                                                            | Williams, Leysa Forrest, Yasmin Panchbhaya, Jacqueline Findlay, Samuel Weeks, Julianne Brown, Kathryn Harris, Paul Randell, James Price, Alison Holmes, Judith Breuer                                                                                                                                                                                                                                                                   |
| EPI_ISL_1474382, EPI_ISL_1474383, EPI_ISL_1474385, EPI_ISL_1474386, EPI_ISL_1474387, EPI_ISL_1474388, EPI_ISL_1474389, EPI_ISL_1474390, EPI_ISL_1474391, EPI_ISL_1474392, EPI_ISL_1474393, EPI_ISL_1474394, EPI_ISL_1474395                                                                     |                                                                                                                                                                                                                     |                                                                            |                                                                                                                                                                                                                                                                                                                                                                                                                                         |
| see above                                                                                                                                                                                                                                                                                       | University of Birmingham                                                                                                                                                                                            | COVID-19 Genomics UK (COG-UK) Consortium                                   | Institute of Microbiology, University of Birmingham: Claire McMurray, Joanne Stockton, Samuel Nicholls, Radoslaw Poplawski, Will Rowe, Josh Quick, Nicholas Loman. University of Birmingham Testing Laboratory: Celina M Whalley, Andrew Bosworth, Charlotte Poxon, Kasun Wanigasooriya, Oliver Pickles, Mike Kidd, Alex Richter, Andrew D Beggs PHE Heartlands Lab: Husam Osman, Andrew Bosworth. Queen Elizabeth Hospital: Anna Casey |
| EPI_ISL_1474578, EPI_ISL_1474579, EPI_ISL_1474580                                                                                                                                                                                                                                               | Virology Department, Royal Infirmary of Edinburgh, NHS Lothian / School of Biological Sciences, University of Edinburgh                                                                                             | COVID-19 Genomics UK (COG-UK) Consortium                                   | McHugh M, Dewar R, Cotton S, Rooke S, O'Toole Á, Scher E, Hill V, McCrone JT, Colquhoun R, Yu X, Jackson B, Rambaut A, Templeton K                                                                                                                                                                                                                                                                                                      |
| EPI_ISL_1474857                                                                                                                                                                                                                                                                                 | University College London, Great Ormond Street Hospital for Children NHS Foundation Trust, Imperial College Healthcare NHS Trust                                                                                    | COVID-19 Genomics UK (COG-UK) Consortium                                   | Sergi Castellano, Rachel Williams, Mark Kristiansen, Paola Resende Silva, Sunando Roy, Tony Brooks, Helena Tutill, Paola Niola, Patricia Dyal, Charlotte Williams, Leysa Forrest, Yasmin Panchbhaya, Jacqueline Findlay, Samuel Weeks, Julianne Brown, Kathryn Harris, Paul Randell, James Price, Alison Holmes, Judith Breuer                                                                                                          |
| EPI_ISL_1474986, EPI_ISL_1474987, EPI_ISL_1474988, EPI_ISL_1474989, EPI_ISL_1474990, EPI_ISL_1475003                                                                                                                                                                                            | Regional Virus Laboratory, Belfast Health and Social Care Trust                                                                                                                                                     | COVID-19 Genomics UK (COG-UK) Consortium                                   | Conall McCaughey, James McKenna, Tanya Curran, Susan Feeney, Alison Watt, Ciara Cox, Mairead Connor, Zoltan Molnar, David Simpson, Derek Fairley                                                                                                                                                                                                                                                                                        |
| EPI_ISL_1475239                                                                                                                                                                                                                                                                                 | Northumbria University / South Tees Hospitals NHS Foundation Trust / North Cumbria Integrated Care NHS Foundation Trust / North Tees and Hartlepool NHS Foundation Trust / Newcastle Hospitals NHS Foundation Trust | COVID-19 Genomics UK (COG-UK) Consortium                                   | Darren L Smith,Andrew Nelson,Matthew Bashton,Greg R Young,Joshua Loh,John Allan,Mohammad A Tariq,Giles S Holt,Gary Black,Wen C Yew,Lynn Dover,Paul Baker,Steve Liggett,Sarah Essex,Jane Greenaway,Debra Padgett,Clive Graham,Garren Scott,Edward Barton,Emma Swindells,Brendan Payne,Jennifer Collins,Yusri Taha,Gary Eltringham                                                                                                        |
| EPI_ISL_1476078, EPI_ISL_1476079, EPI_ISL_1476098, EPI_ISL_1476099, EPI_ISL_1476102, EPI_ISL_1476176, EPI_ISL_1476182, EPI_ISL_1476185, EPI_ISL_1476189, EPI_ISL_1476192, EPI_ISL_1476193, EPI_ISL_1476195, EPI_ISL_1476196, EPI_ISL_1476197, EPI_ISL_1476201, EPI_ISL_1476204, EPI_ISL_1476256 | see above                                                                                                                                                                                                           | Public Health Wales Microbiology Cardiff Wales Specialist Virology Centre  | Catherine Moore, Johnathan Evans, Laura Gifford, Malorie Perry, Simon Cottrell, Angela Marchbank, Alec Birchley, Alexander Adams, Amy Gaskin, Bree Gatica-Wilcox, Jason Coombes, Joel Southgate, Lauren Gilbert, Lee Graham, Nicole Pacchiarini, Sara Kumziene-Summerhayes, Sarah Taylor, Sophie Jones, Sara Rey, Matthew Bull, Joanne Watkins, Sally Corden, Tom Connor                                                                |
| EPI_ISL_1476563                                                                                                                                                                                                                                                                                 | Centre for Enzyme Innovation, University of Portsmouth / Translational Research Laboratory, Portsmouth Hospitals NHS Trust                                                                                          | COVID-19 Genomics UK (COG-UK) Consortium                                   | Angela Beckett,Salman Goudarzi,Christopher Fearn,Kate Cook,Katie Loveson,Sharon Glaysher,Scott Elliott,Samuel Robson                                                                                                                                                                                                                                                                                                                    |
| EPI_ISL_837058, EPI_ISL_837063, EPI_ISL_837065, EPI_ISL_837073, EPI_ISL_837087, EPI_ISL_837183, EPI_ISL_837196, EPI_ISL_837197, EPI_ISL_837245, EPI_ISL_837246                                                                                                                                  | Respiratory Virus Unit, National Infection Service, Public Health England                                                                                                                                           | COVID-19 Genomics UK (COG-UK) Consortium                                   | PHE Covid Sequencing Team                                                                                                                                                                                                                                                                                                                                                                                                               |
| EPI_ISL_838015, EPI_ISL_838017, EPI_ISL_838018, EPI_ISL_838021, EPI_ISL_838022, EPI_ISL_838025, EPI_ISL_838035, EPI_ISL_838038, EPI_ISL_838048                                                                                                                                                  | Department of Pathology, University of Cambridge                                                                                                                                                                    | COVID-19 Genomics UK (COG-UK) Consortium                                   | Aminu S. Jahun, Yasmin Chaudhry, Grant Hall, Iliana Georgana, Myra Hosmillo, Martin D. Curran, Malte Pinckert, Surendra Parmar, Ian Goodfellow                                                                                                                                                                                                                                                                                          |
| EPI_ISL_839006, EPI_ISL_839020                                                                                                                                                                                                                                                                  | University College London, Great Ormond Street Hospital for Children NHS Foundation Trust, Imperial College Healthcare NHS Trust                                                                                    | COVID-19 Genomics UK (COG-UK) Consortium                                   | Sergi Castellano, Rachel Williams, Mark Kristiansen, Paola Resende Silva, Sunando Roy, Tony Brooks, Helena Tutill, Paola Niola, Patricia Dyal, Charlotte Williams, Leysa Forrest, Yasmin Panchbhaya, Jacqueline Findlay, Samuel Weeks, Julianne Brown, Kathryn Harris, Paul Randell, James Price, Alison Holmes, Judith Breuer                                                                                                          |
| EPI_ISL_846774                                                                                                                                                                                                                                                                                  | Respiratory Virus Unit, National Infection Service, Public Health England                                                                                                                                           | COVID-19 Genomics UK (COG-UK) Consortium                                   | PHE Covid Sequencing Team                                                                                                                                                                                                                                                                                                                                                                                                               |
| EPI_ISL_852014                                                                                                                                                                                                                                                                                  | Lighthouse Lab in Milton Keynes                                                                                                                                                                                     | Wellcome Sanger Institute for the COVID-19 Genomics UK (COG-UK) Consortium | The Lighthouse Lab in Milton Keynes and Alex Alderton, Roberto Amato, Sonia Goncalves, Ewan Harrison, David K. Jackson, Ian Johnston, Dominic Kwiatkowski, Cordelia Langford, John Sillitoe on behalf of the Wellcome Sanger Institute COVID-19 Surveillance Team                                                                                                                                                                       |
| EPI_ISL_855603                                                                                                                                                                                                                                                                                  | Respiratory Virus Unit, National Infection Service, Public Health England                                                                                                                                           | COVID-19 Genomics UK (COG-UK) Consortium                                   | PHE Covid Sequencing Team                                                                                                                                                                                                                                                                                                                                                                                                               |
| EPI_ISL_857855                                                                                                                                                                                                                                                                                  | Lighthouse Lab in Cambridge                                                                                                                                                                                         | Wellcome Sanger Institute for the COVID-19 Genomics UK (COG-UK) Consortium | Rob Howes, The Lighthouse Lab in Cambridge and Alex Alderton, Roberto Amato, Sonia Goncalves, Ewan Harrison, David K. Jackson, Ian Johnston, Dominic Kwiatkowski, Cordelia Langford, John Sillitoe on behalf of the Wellcome Sanger Institute COVID-19 Surveillance Team                                                                                                                                                                |
| EPI_ISL_860686, EPI_ISL_860691, EPI_ISL_860694, EPI_ISL_860695, EPI_ISL_860709, EPI_ISL_862193, EPI_ISL_862259                                                                                                                                                                                  | Respiratory Virus Unit, National Infection Service, Public Health England                                                                                                                                           | COVID-19 Genomics UK (COG-UK) Consortium                                   | PHE Covid Sequencing Team                                                                                                                                                                                                                                                                                                                                                                                                               |
| EPI_ISL_863245, EPI_ISL_863246, EPI_ISL_863247, EPI_ISL_863248, EPI_ISL_863249, EPI_ISL_863250                                                                                                                                                                                                  | Lighthouse Lab in Glasgow                                                                                                                                                                                           | Wellcome Sanger Institute for the COVID-19 Genomics UK (COG-UK) Consortium | Harper VanSteenhouse, Yumi Kasai, David Gray, Carol Clugston, Anna Dominiczak and Alex Alderton, Roberto Amato, Sonia Goncalves, Ewan Harrison, David K. Jackson, Ian Johnston, Dominic Kwiatkowski, Cordelia Langford, John Sillitoe on behalf of the Wellcome Sanger Institute COVID-19 Surveillance Team                                                                                                                             |
| EPI_ISL_863251                                                                                                                                                                                                                                                                                  | Lighthouse Lab in Alderley Park                                                                                                                                                                                     | Wellcome Sanger Institute for the COVID-19 Genomics UK (COG-UK) Consortium | Jacquelyn Wynn, Mairead Hyland, The Lighthouse Lab in Alderley Park and Alex Alderton, Roberto Amato, Sonia Goncalves, Ewan Harrison, David K. Jackson, Ian Johnston, Dominic Kwiatkowski, Cordelia Langford, John Sillitoe on behalf of the Wellcome Sanger Institute COVID-19 Surveillance Team                                                                                                                                       |
| EPI_ISL_863252, EPI_ISL_863253                                                                                                                                                                                                                                                                  | Lighthouse Lab in Glasgow                                                                                                                                                                                           | Wellcome Sanger Institute for the COVID-19 Genomics UK (COG-UK) Consortium | Harper VanSteenhouse, Yumi Kasai, David Gray, Carol Clugston, Anna Dominiczak and Alex Alderton, Roberto Amato, Sonia Goncalves, Ewan Harrison, David K. Jackson, Ian Johnston, Dominic Kwiatkowski, Cordelia Langford, John Sillitoe on behalf of the Wellcome Sanger Institute COVID-19 Surveillance Team                                                                                                                             |
| EPI_ISL_863254                                                                                                                                                                                                                                                                                  | Lighthouse Lab in Alderley Park                                                                                                                                                                                     | Wellcome Sanger Institute for the COVID-19 Genomics UK (COG-UK) Consortium | Jacquelyn Wynn, Mairead Hyland, The Lighthouse Lab in Alderley Park and Alex Alderton, Roberto Amato, Sonia Goncalves, Ewan Harrison, David K. Jackson, Ian Johnston, Dominic Kwiatkowski, Cordelia Langford, John Sillitoe on behalf of the Wellcome Sanger Institute COVID-19 Surveillance Team                                                                                                                                       |
| EPI_ISL_863255, EPI_ISL_863256, EPI_ISL_863257                                                                                                                                                                                                                                                  | Lighthouse Lab in Glasgow                                                                                                                                                                                           | Wellcome Sanger Institute for the COVID-19 Genomics UK (COG-UK) Consortium | Harper VanSteenhouse, Yumi Kasai, David Gray, Carol Clugston, Anna Dominiczak and Alex Alderton, Roberto Amato, Sonia Goncalves, Ewan Harrison, David K. Jackson, Ian Johnston, Dominic Kwiatkowski, Cordelia Langford, John Sillitoe on behalf of the Wellcome Sanger Institute COVID-19 Surveillance Team                                                                                                                             |
| EPI_ISL_863258                                                                                                                                                                                                                                                                                  | Lighthouse Lab in Alderley Park                                                                                                                                                                                     | Wellcome Sanger Institute for the COVID-19 Genomics UK (COG-UK) Consortium | Jacquelyn Wynn, Mairead Hyland, The Lighthouse Lab in Alderley Park and Alex Alderton, Roberto Amato, Sonia Goncalves, Ewan Harrison, David K. Jackson, Ian Johnston, Dominic Kwiatkowski, Cordelia Langford, John Sillitoe on behalf of the Wellcome Sanger Institute COVID-19 Surveillance Team                                                                                                                                       |
| EPI_ISL_863259, EPI_ISL_863260, EPI_ISL_863261, EPI_ISL_863262, EPI_ISL_863263, EPI_ISL_863264, EPI_ISL_863265, EPI_ISL_863266, EPI_ISL_863267                                                                                                                                                  | Lighthouse Lab in Glasgow                                                                                                                                                                                           | Wellcome Sanger Institute for the COVID-19 Genomics UK (COG-UK) Consortium | Harper VanSteenhouse, Yumi Kasai, David Gray, Carol Clugston, Anna Dominiczak and Alex Alderton, Roberto Amato, Sonia Goncalves, Ewan Harrison, David K. Jackson, Ian Johnston, Dominic Kwiatkowski, Cordelia Langford, John Sillitoe on behalf of the Wellcome Sanger Institute COVID-19 Surveillance Team                                                                                                                             |
| EPI_ISL_863268                                                                                                                                                                                                                                                                                  | Lighthouse Lab in Alderley Park                                                                                                                                                                                     | Wellcome Sanger Institute for the COVID-19 Genomics UK (COG-UK) Consortium | Jacquelyn Wynn, Mairead Hyland, The Lighthouse Lab in Alderley Park and Alex Alderton, Roberto Amato, Sonia Goncalves, Ewan Harrison, David K. Jackson, Ian Johnston, Dominic Kwiatkowski, Cordelia Langford, John Sillitoe on behalf of the Wellcome Sanger Institute COVID-19 Surveillance Team                                                                                                                                       |
| EPI_ISL_863269                                                                                                                                                                                                                                                                                  | Lighthouse Lab in Glasgow                                                                                                                                                                                           | Wellcome Sanger Institute for the COVID-19 Genomics UK                     | Harper VanSteenhouse, Yumi Kasai, David Gray, Carol Clugston, Anna Dominiczak and Alex Alderton, Roberto Amato, Sonia Goncalves, Ewan Harrison,                                                                                                                                                                                                                                                                                         |

[illegible]

[illegible]

[illegible]

[illegible]

|                                                                                                                                                                                                                                                                                                                                                                                                                                                                                                                                                                                                                                                                                                                                                                                                                                                                                                                                                                                                                                                                                                                                                                                                                                                                                                                                                                                                                                                                                                                                                                                                                                                                                                                                                                                                                                                                                                                                                                                                                                                                                                                                                                                                                           |           |                                                                                                                                  |                                          |                                                                                                                                                                                                                                                                                                                                                                                                                                                            |
|---------------------------------------------------------------------------------------------------------------------------------------------------------------------------------------------------------------------------------------------------------------------------------------------------------------------------------------------------------------------------------------------------------------------------------------------------------------------------------------------------------------------------------------------------------------------------------------------------------------------------------------------------------------------------------------------------------------------------------------------------------------------------------------------------------------------------------------------------------------------------------------------------------------------------------------------------------------------------------------------------------------------------------------------------------------------------------------------------------------------------------------------------------------------------------------------------------------------------------------------------------------------------------------------------------------------------------------------------------------------------------------------------------------------------------------------------------------------------------------------------------------------------------------------------------------------------------------------------------------------------------------------------------------------------------------------------------------------------------------------------------------------------------------------------------------------------------------------------------------------------------------------------------------------------------------------------------------------------------------------------------------------------------------------------------------------------------------------------------------------------------------------------------------------------------------------------------------------------|-----------|----------------------------------------------------------------------------------------------------------------------------------|------------------------------------------|------------------------------------------------------------------------------------------------------------------------------------------------------------------------------------------------------------------------------------------------------------------------------------------------------------------------------------------------------------------------------------------------------------------------------------------------------------|
| EPI_ISL_866273, EPI_ISL_866274, EPI_ISL_866275, EPI_ISL_866276, EPI_ISL_866277, EPI_ISL_866278, EPI_ISL_866279, EPI_ISL_866280, EPI_ISL_866281, EPI_ISL_866282, EPI_ISL_866283, EPI_ISL_866284, EPI_ISL_866285, EPI_ISL_866286, EPI_ISL_866287, EPI_ISL_866288, EPI_ISL_866289, EPI_ISL_866290, EPI_ISL_866291, EPI_ISL_866292, EPI_ISL_866293, EPI_ISL_866294, EPI_ISL_866295, EPI_ISL_866296, EPI_ISL_866297, EPI_ISL_866298, EPI_ISL_866299, EPI_ISL_866300, EPI_ISL_866301, EPI_ISL_866302, EPI_ISL_866303, EPI_ISL_866304, EPI_ISL_866305, EPI_ISL_866306, EPI_ISL_866307, EPI_ISL_866308, EPI_ISL_866309, EPI_ISL_866310, EPI_ISL_866311, EPI_ISL_866312, EPI_ISL_866313, EPI_ISL_866314, EPI_ISL_866315, EPI_ISL_866316, EPI_ISL_866317, EPI_ISL_866318, EPI_ISL_866319                                                                                                                                                                                                                                                                                                                                                                                                                                                                                                                                                                                                                                                                                                                                                                                                                                                                                                                                                                                                                                                                                                                                                                                                                                                                                                                                                                                                                                            | see above | University College London, Great Ormond Street Hospital for Children NHS Foundation Trust, Imperial College Healthcare NHS Trust | COVID-19 Genomics UK (COG-UK) Consortium | Sergi Castellano, Rachel Williams, Mark Kristiansen, Paola Resende Silva, Sunardo Roy, Tony Brooks, Helena Tutill, Paola Niola, Patricia Dyal, Charlotte Williams, Leysa Forrest, Yasmin Panchbhaya, Jacqueline Findlay, Samuel Weeks, Julianne Brown, Kathryn Harris, Paul Randall, James Price, Alison Holmes, Judith Breuer                                                                                                                             |
| EPI_ISL_866541, EPI_ISL_866548, EPI_ISL_866556, EPI_ISL_866566, EPI_ISL_866569, EPI_ISL_866748, EPI_ISL_866749, EPI_ISL_866750, EPI_ISL_866751, EPI_ISL_866752, EPI_ISL_866753, EPI_ISL_866754, EPI_ISL_866755, EPI_ISL_866756, EPI_ISL_866757, EPI_ISL_866760, EPI_ISL_866763, EPI_ISL_866764, EPI_ISL_866767, EPI_ISL_866770, EPI_ISL_866774, EPI_ISL_866775, EPI_ISL_866781, EPI_ISL_866788, EPI_ISL_866789, EPI_ISL_866801, EPI_ISL_866835, EPI_ISL_866836, EPI_ISL_866837, EPI_ISL_866838, EPI_ISL_866844, EPI_ISL_866845, EPI_ISL_866846, EPI_ISL_866847, EPI_ISL_866848, EPI_ISL_866849, EPI_ISL_866850, EPI_ISL_866851, EPI_ISL_866852, EPI_ISL_866853, EPI_ISL_866854, EPI_ISL_866855, EPI_ISL_866856, EPI_ISL_866857, EPI_ISL_866858, EPI_ISL_866859, EPI_ISL_866860, EPI_ISL_866861, EPI_ISL_866862, EPI_ISL_866863, EPI_ISL_866864, EPI_ISL_866865, EPI_ISL_866866, EPI_ISL_866867, EPI_ISL_866868, EPI_ISL_866869, EPI_ISL_866871, EPI_ISL_866872, EPI_ISL_866873, EPI_ISL_866874, EPI_ISL_866875, EPI_ISL_866876, EPI_ISL_866877, EPI_ISL_866878, EPI_ISL_866879, EPI_ISL_866880, EPI_ISL_866881, EPI_ISL_866882, EPI_ISL_866883, EPI_ISL_866884, EPI_ISL_866885, EPI_ISL_866886, EPI_ISL_866887, EPI_ISL_866888                                                                                                                                                                                                                                                                                                                                                                                                                                                                                                                                                                                                                                                                                                                                                                                                                                                                                                                                                                                            | see above | Quadram Institute Bioscience                                                                                                     | COVID-19 Genomics UK (COG-UK) Consortium | Dave J. Baker, Gemma L. Kay, Alp Aydin, Thanh Le-Viet, Steven Rudder, Ana P. Tedim, Anastasia Kolyva, Maria Diaz, Leonardo de Oliveira Martins, Nabil-Fareed Alikhan, Lizzie Meadows, Rachael Stanley, Ngozi Elumogo, Muhammed Yasin, Nicholas M. Thomson, Alexander J. Trotter, Andrew Gilroy, Samuel Bloomfield, Claire Stuart, Andrew Bell, Reenesh Prakash, Samir Dervisevic, Alison E. Mather, John Wain, Mark Webber, Andrew J. Page, Justin O'Grady |
| EPI_ISL_866921, EPI_ISL_866922, EPI_ISL_866923, EPI_ISL_866924, EPI_ISL_866925, EPI_ISL_866926, EPI_ISL_866927, EPI_ISL_866928, EPI_ISL_866929, EPI_ISL_866930, EPI_ISL_866931, EPI_ISL_866932, EPI_ISL_866933, EPI_ISL_866934, EPI_ISL_866935, EPI_ISL_866936, EPI_ISL_866937, EPI_ISL_866938, EPI_ISL_866939, EPI_ISL_866940, EPI_ISL_866941, EPI_ISL_866942, EPI_ISL_866943, EPI_ISL_866944, EPI_ISL_866945, EPI_ISL_866946, EPI_ISL_866947, EPI_ISL_866948, EPI_ISL_866949, EPI_ISL_866950, EPI_ISL_866971, EPI_ISL_866972, EPI_ISL_866973, EPI_ISL_866974, EPI_ISL_866975, EPI_ISL_866976, EPI_ISL_866977, EPI_ISL_866978, EPI_ISL_866979, EPI_ISL_866980, EPI_ISL_866981, EPI_ISL_866982, EPI_ISL_866983, EPI_ISL_866984, EPI_ISL_866986, EPI_ISL_866987, EPI_ISL_866988, EPI_ISL_866989                                                                                                                                                                                                                                                                                                                                                                                                                                                                                                                                                                                                                                                                                                                                                                                                                                                                                                                                                                                                                                                                                                                                                                                                                                                                                                                                                                                                                            | see above | Queens Medical Centre, Clinical Microbiology Department / DeepSeq Nottingham                                                     | COVID-19 Genomics UK (COG-UK) Consortium | Gemma Clark, Wendy Smith, Manjinder Khakh, Vicki M Fleming, Michelle M Lister, Hannah Howson-Wells, Jonathan Ball, Patrick McClure, Joseph Chappell, Theocharis Tsoletidis, Nadine Holmes, Matthew Carlisle, Christopher Moore, Fei Sang, Johnny Debebe, Victoria Wright, Matthew Loose                                                                                                                                                                    |
| EPI_ISL_867234, EPI_ISL_867235, EPI_ISL_867236, EPI_ISL_867259, EPI_ISL_867260, EPI_ISL_867262, EPI_ISL_867263, EPI_ISL_867264, EPI_ISL_867265, EPI_ISL_867266, EPI_ISL_867267, EPI_ISL_867268, EPI_ISL_867407, EPI_ISL_867408, EPI_ISL_867409, EPI_ISL_867410, EPI_ISL_867411, EPI_ISL_867412, EPI_ISL_867413, EPI_ISL_867414, EPI_ISL_867415, EPI_ISL_867420, EPI_ISL_867421, EPI_ISL_867422, EPI_ISL_867423, EPI_ISL_867424, EPI_ISL_867425, EPI_ISL_867426, EPI_ISL_867427, EPI_ISL_867428, EPI_ISL_867436, EPI_ISL_867444, EPI_ISL_867445, EPI_ISL_867446, EPI_ISL_867447, EPI_ISL_867448, EPI_ISL_867449, EPI_ISL_867452, EPI_ISL_867453, EPI_ISL_867454, EPI_ISL_867455, EPI_ISL_867460, EPI_ISL_867462, EPI_ISL_867463, EPI_ISL_867464, EPI_ISL_867465, EPI_ISL_867466, EPI_ISL_867467, EPI_ISL_867468, EPI_ISL_867469, EPI_ISL_867470, EPI_ISL_867471, EPI_ISL_867472, EPI_ISL_867473, EPI_ISL_867474, EPI_ISL_867475, EPI_ISL_867476, EPI_ISL_867477, EPI_ISL_867478, EPI_ISL_867479, EPI_ISL_867480, EPI_ISL_867481, EPI_ISL_867482, EPI_ISL_867483, EPI_ISL_867484, EPI_ISL_867485, EPI_ISL_867487, EPI_ISL_867488, EPI_ISL_867489, EPI_ISL_867495, EPI_ISL_867496, EPI_ISL_867502, EPI_ISL_867549, EPI_ISL_867576, EPI_ISL_867577, EPI_ISL_867585, EPI_ISL_867591, EPI_ISL_867592, EPI_ISL_867594, EPI_ISL_867595, EPI_ISL_867596, EPI_ISL_867597, EPI_ISL_867599, EPI_ISL_867600, EPI_ISL_867601, EPI_ISL_867602, EPI_ISL_867605, EPI_ISL_867607, EPI_ISL_867608, EPI_ISL_867610, EPI_ISL_867611, EPI_ISL_867613, EPI_ISL_867616, EPI_ISL_867617, EPI_ISL_867618, EPI_ISL_867620, EPI_ISL_867621, EPI_ISL_867623, EPI_ISL_867624, EPI_ISL_867625, EPI_ISL_867628, EPI_ISL_867629, EPI_ISL_867630, EPI_ISL_867631, EPI_ISL_867633, EPI_ISL_867634, EPI_ISL_867635, EPI_ISL_867636, EPI_ISL_867637, EPI_ISL_867639, EPI_ISL_867640, EPI_ISL_867641, EPI_ISL_867642, EPI_ISL_867643, EPI_ISL_867644, EPI_ISL_867647, EPI_ISL_867649, EPI_ISL_867650, EPI_ISL_867651, EPI_ISL_867652, EPI_ISL_867653, EPI_ISL_867654, EPI_ISL_867655, EPI_ISL_867656, EPI_ISL_867657, EPI_ISL_867658, EPI_ISL_867659, EPI_ISL_867660, EPI_ISL_867661, EPI_ISL_867662, EPI_ISL_867663, EPI_ISL_867664, EPI_ISL_867665, EPI_ISL_8 |           |                                                                                                                                  |                                          |                                                                                                                                                                                                                                                                                                                                                                                                                                                            |



[illegible]

[illegible]

[illegible]

[illegible]

[illegible]

|                                                                                                                                                                                                                                                                                                                                                                                                                                                                                                                                                                                                                                                                                                                                                                                                                                                                                                                                                                                                                                                                                                                                                                                                                                                                                                                                                                                                                                                                                                                                                                                                                                                                                                                                                                                                                                                                                                                                                                                                                                                                                                                                                                                                                                                                                                                                                                                                                                                                                                                                                                                                                                                                                                                                                                                                                                                                                                                                                                                                                                                                                                                                                                                                                                                                                                                                                                                                                                                                                                                                                                                                                                                                                                                                                                                                                                                                                                                                                                                                                                                                                                                                                                                                                                                                                                                                                                                                                                                                                                                                                                                                                                                                                                                                                                                                                                                                                                                                                                                                                                                                |           |                                 |                                                                            |                                                                                                                                                                                                                                                                                                   |
|----------------------------------------------------------------------------------------------------------------------------------------------------------------------------------------------------------------------------------------------------------------------------------------------------------------------------------------------------------------------------------------------------------------------------------------------------------------------------------------------------------------------------------------------------------------------------------------------------------------------------------------------------------------------------------------------------------------------------------------------------------------------------------------------------------------------------------------------------------------------------------------------------------------------------------------------------------------------------------------------------------------------------------------------------------------------------------------------------------------------------------------------------------------------------------------------------------------------------------------------------------------------------------------------------------------------------------------------------------------------------------------------------------------------------------------------------------------------------------------------------------------------------------------------------------------------------------------------------------------------------------------------------------------------------------------------------------------------------------------------------------------------------------------------------------------------------------------------------------------------------------------------------------------------------------------------------------------------------------------------------------------------------------------------------------------------------------------------------------------------------------------------------------------------------------------------------------------------------------------------------------------------------------------------------------------------------------------------------------------------------------------------------------------------------------------------------------------------------------------------------------------------------------------------------------------------------------------------------------------------------------------------------------------------------------------------------------------------------------------------------------------------------------------------------------------------------------------------------------------------------------------------------------------------------------------------------------------------------------------------------------------------------------------------------------------------------------------------------------------------------------------------------------------------------------------------------------------------------------------------------------------------------------------------------------------------------------------------------------------------------------------------------------------------------------------------------------------------------------------------------------------------------------------------------------------------------------------------------------------------------------------------------------------------------------------------------------------------------------------------------------------------------------------------------------------------------------------------------------------------------------------------------------------------------------------------------------------------------------------------------------------------------------------------------------------------------------------------------------------------------------------------------------------------------------------------------------------------------------------------------------------------------------------------------------------------------------------------------------------------------------------------------------------------------------------------------------------------------------------------------------------------------------------------------------------------------------------------------------------------------------------------------------------------------------------------------------------------------------------------------------------------------------------------------------------------------------------------------------------------------------------------------------------------------------------------------------------------------------------------------------------------------------------------------------------|-----------|---------------------------------|----------------------------------------------------------------------------|---------------------------------------------------------------------------------------------------------------------------------------------------------------------------------------------------------------------------------------------------------------------------------------------------|
| EPI_ISL_878156, EPI_ISL_878160, EPI_ISL_878161, EPI_ISL_878163, EPI_ISL_878164, EPI_ISL_878166, EPI_ISL_878169, EPI_ISL_878171, EPI_ISL_878173, EPI_ISL_878174, EPI_ISL_878176, EPI_ISL_878177, EPI_ISL_878179, EPI_ISL_878181, EPI_ISL_878182, EPI_ISL_878184, EPI_ISL_878185, EPI_ISL_878187, EPI_ISL_878188, EPI_ISL_878190, EPI_ISL_878192, EPI_ISL_878193, EPI_ISL_878195, EPI_ISL_878196, EPI_ISL_878200, EPI_ISL_878201, EPI_ISL_878202, EPI_ISL_878203, EPI_ISL_878204, EPI_ISL_878206, EPI_ISL_878208, EPI_ISL_878210, EPI_ISL_878212, EPI_ISL_878213, EPI_ISL_878214, EPI_ISL_878216, EPI_ISL_878218, EPI_ISL_878219, EPI_ISL_878220, EPI_ISL_878222, EPI_ISL_878224, EPI_ISL_878225, EPI_ISL_878227, EPI_ISL_878228, EPI_ISL_878230, EPI_ISL_878231, EPI_ISL_878232, EPI_ISL_878233, EPI_ISL_878235, EPI_ISL_878236, EPI_ISL_878240, EPI_ISL_878241, EPI_ISL_878243, EPI_ISL_878244, EPI_ISL_878246, EPI_ISL_878247, EPI_ISL_878249, EPI_ISL_878251, EPI_ISL_878252, EPI_ISL_878254, EPI_ISL_878255, EPI_ISL_878257, EPI_ISL_878258, EPI_ISL_878261, EPI_ISL_878262, EPI_ISL_878264, EPI_ISL_878265, EPI_ISL_878267, EPI_ISL_878269, EPI_ISL_878270, EPI_ISL_878272, EPI_ISL_878273, EPI_ISL_878275, EPI_ISL_878277, EPI_ISL_878278, EPI_ISL_878280, EPI_ISL_878282, EPI_ISL_878283, EPI_ISL_878285, EPI_ISL_878286, EPI_ISL_878288, EPI_ISL_878289, EPI_ISL_878291, EPI_ISL_878293, EPI_ISL_878294, EPI_ISL_878296, EPI_ISL_878297, EPI_ISL_878299, EPI_ISL_878301, EPI_ISL_878302, EPI_ISL_878304, EPI_ISL_878306, EPI_ISL_878307, EPI_ISL_878309, EPI_ISL_878310, EPI_ISL_878312, EPI_ISL_878313, EPI_ISL_878315, EPI_ISL_878317, EPI_ISL_878318, EPI_ISL_878320, EPI_ISL_878321, EPI_ISL_878323, EPI_ISL_878324, EPI_ISL_878326, EPI_ISL_878328, EPI_ISL_878329, EPI_ISL_878331, EPI_ISL_878332, EPI_ISL_878334, EPI_ISL_878335, EPI_ISL_878337, EPI_ISL_878339, EPI_ISL_878340, EPI_ISL_878400, EPI_ISL_878410, EPI_ISL_878412, EPI_ISL_878414, EPI_ISL_878415, EPI_ISL_878417, EPI_ISL_878419, EPI_ISL_878420, EPI_ISL_878422, EPI_ISL_878424, EPI_ISL_878425, EPI_ISL_878427, EPI_ISL_878428, EPI_ISL_878430, EPI_ISL_878432, EPI_ISL_878435, EPI_ISL_878436, EPI_ISL_878438, EPI_ISL_878439, EPI_ISL_878441, EPI_ISL_878442, EPI_ISL_878444, EPI_ISL_878446, EPI_ISL_878449, EPI_ISL_878451, EPI_ISL_878453, EPI_ISL_878454, EPI_ISL_878456, EPI_ISL_878458, EPI_ISL_878459, EPI_ISL_878461, EPI_ISL_878462, EPI_ISL_878464, EPI_ISL_878466, EPI_ISL_878467, EPI_ISL_878469, EPI_ISL_878471, EPI_ISL_878473, EPI_ISL_878475, EPI_ISL_878476, EPI_ISL_878478, EPI_ISL_878479, EPI_ISL_878481, EPI_ISL_878482, EPI_ISL_878484, EPI_ISL_878486, EPI_ISL_878487, EPI_ISL_878489, EPI_ISL_878490, EPI_ISL_878492, EPI_ISL_878493, EPI_ISL_878494, EPI_ISL_878496, EPI_ISL_878497, EPI_ISL_878499, EPI_ISL_878501, EPI_ISL_878502, EPI_ISL_878504, EPI_ISL_878505, EPI_ISL_878507, EPI_ISL_878508, EPI_ISL_878510, EPI_ISL_878512, EPI_ISL_878513, EPI_ISL_878515, EPI_ISL_878517, EPI_ISL_878518, EPI_ISL_878520, EPI_ISL_878521, EPI_ISL_878523, EPI_ISL_878525, EPI_ISL_878527, EPI_ISL_878528, EPI_ISL_878530, EPI_ISL_878532, EPI_ISL_878533, EPI_ISL_878535, EPI_ISL_878538, EPI_ISL_878539, EPI_ISL_878541, EPI_ISL_878542, EPI_ISL_878544, EPI_ISL_878546, EPI_ISL_878548, EPI_ISL_878549, EPI_ISL_878551, EPI_ISL_878553, EPI_ISL_878555, EPI_ISL_878556, EPI_ISL_878558, EPI_ISL_878559, EPI_ISL_878561, EPI_ISL_878564, EPI_ISL_878567, EPI_ISL_878569, EPI_ISL_878570, EPI_ISL_878572, EPI_ISL_878573, EPI_ISL_878575, EPI_ISL_878577, EPI_ISL_878580, EPI_ISL_878582, EPI_ISL_878583, EPI_ISL_878585, EPI_ISL_878587, EPI_ISL_878588, EPI_ISL_878590, EPI_ISL_878591, EPI_ISL_878593, EPI_ISL_878594, EPI_ISL_878596, EPI_ISL_878598, EPI_ISL_878599, EPI_ISL_878601, EPI_ISL_878602, EPI_ISL_878604, EPI_ISL_878606, EPI_ISL_878607, EPI_ISL_878609, EPI_ISL_878612, EPI_ISL_878614, EPI_ISL_878615, EPI_ISL_878617, EPI_ISL_878618, EPI_ISL_878620, EPI_ISL_878621, EPI_ISL_878625, EPI_ISL_878626, EPI_ISL_878628, EPI_ISL_878630, EPI_ISL_878631, EPI_ISL_878633, EPI_ISL_878634, EPI_ISL_878636, EPI_ISL_878638, EPI_ISL_878639, EPI_ISL_878640, EPI_ISL_878642, EPI_ISL_878643, EPI_ISL_878645, EPI_ISL_878646, EPI_ISL_878648, EPI_ISL_878649, EPI_ISL_878650, EPI_ISL_878652, EPI_ISL_878654, EPI_ISL_878655, EPI_ISL_878657, EPI_ISL_878659, EPI_ISL_878660, EPI_ISL_878662, EPI_ISL_878663, EPI_ISL_878665, EPI_ISL_878667, EPI_ISL_878668, EPI_ISL_878670, EPI_ISL_878672, EPI_ISL_878673, EPI_ISL_878675, EPI_ISL_878677, EPI_ISL_878679, EPI_ISL_878680, EPI_ISL_878682, EPI_ISL_878683, EPI_ISL_878685, EPI_ISL_878686, EPI_ISL_878688, EPI_ISL_878689, EPI_ISL_878691, EPI_ISL_878692, EPI_ISL_878694, EPI_ISL_878696, EPI_ISL_878698, EPI_ISL_878700, EPI_ISL_878701, EPI_ISL_878703, EPI_ISL_878704, EPI_ISL_878706, EPI_ISL_878709, EPI_ISL_878711, EPI_ISL_878712, EPI_ISL_878714, EPI_ISL_878715, EPI_ISL_878718, EPI_ISL_878720, EPI_ISL_878722, EPI_ISL_878723, EPI_ISL_878725, EPI_ISL_878727, EPI_ISL_878730 | see above | Lighthouse Lab in Alderley Park | Wellcome Sanger Institute for the COVID-19 Genomics UK (COG-UK) Consortium | Jacquelyn Wynn, Mairead Hyland, The Lighthouse Lab in Alderley Park and Alex Alderton, Roberto Amato, Sonia Goncalves, Ewan Harrison, David K. Jackson, Ian Johnston, Dominic Kwiatkowski, Cordelia Langford, John Sillitoe on behalf of the Wellcome Sanger Institute COVID-19 Surveillance Team |
| EPI_ISL_878731, EPI_ISL_878740                                                                                                                                                                                                                                                                                                                                                                                                                                                                                                                                                                                                                                                                                                                                                                                                                                                                                                                                                                                                                                                                                                                                                                                                                                                                                                                                                                                                                                                                                                                                                                                                                                                                                                                                                                                                                                                                                                                                                                                                                                                                                                                                                                                                                                                                                                                                                                                                                                                                                                                                                                                                                                                                                                                                                                                                                                                                                                                                                                                                                                                                                                                                                                                                                                                                                                                                                                                                                                                                                                                                                                                                                                                                                                                                                                                                                                                                                                                                                                                                                                                                                                                                                                                                                                                                                                                                                                                                                                                                                                                                                                                                                                                                                                                                                                                                                                                                                                                                                                                                                                 |           | Lighthouse Lab in Cambridge     | Wellcome Sanger Institute for the COVID-19 Genomics UK (COG-UK) Consortium | Rob Howes, The Lighthouse Lab in Cambridge and Alex Alderton, Roberto Amato, Sonia Goncalves, Ewan Harrison, David K. Jackson, Ian Johnston, Dominic Kwiatkowski, Cordelia Langford, John Sillitoe on behalf of the Wellcome Sanger Institute COVID-19 Surveillance Team                          |
| EPI_ISL_878751, EPI_ISL_878756                                                                                                                                                                                                                                                                                                                                                                                                                                                                                                                                                                                                                                                                                                                                                                                                                                                                                                                                                                                                                                                                                                                                                                                                                                                                                                                                                                                                                                                                                                                                                                                                                                                                                                                                                                                                                                                                                                                                                                                                                                                                                                                                                                                                                                                                                                                                                                                                                                                                                                                                                                                                                                                                                                                                                                                                                                                                                                                                                                                                                                                                                                                                                                                                                                                                                                                                                                                                                                                                                                                                                                                                                                                                                                                                                                                                                                                                                                                                                                                                                                                                                                                                                                                                                                                                                                                                                                                                                                                                                                                                                                                                                                                                                                                                                                                                                                                                                                                                                                                                                                 |           | Lighthouse Lab in Milton Keynes | Wellcome Sanger Institute for the COVID-19 Genomics UK (COG-UK) Consortium | The Lighthouse Lab in Milton Keynes and Alex Alderton, Roberto Amato, Sonia Goncalves, Ewan Harrison, David K. Jackson, Ian Johnston, Dominic Kwiatkowski, Cordelia Langford, John Sillitoe on behalf of the Wellcome Sanger Institute COVID-19 Surveillance Team                                 |
| EPI_ISL_878758                                                                                                                                                                                                                                                                                                                                                                                                                                                                                                                                                                                                                                                                                                                                                                                                                                                                                                                                                                                                                                                                                                                                                                                                                                                                                                                                                                                                                                                                                                                                                                                                                                                                                                                                                                                                                                                                                                                                                                                                                                                                                                                                                                                                                                                                                                                                                                                                                                                                                                                                                                                                                                                                                                                                                                                                                                                                                                                                                                                                                                                                                                                                                                                                                                                                                                                                                                                                                                                                                                                                                                                                                                                                                                                                                                                                                                                                                                                                                                                                                                                                                                                                                                                                                                                                                                                                                                                                                                                                                                                                                                                                                                                                                                                                                                                                                                                                                                                                                                                                                                                 |           | Lighthouse                      |                                                                            |                                                                                                                                                                                                                                                                                                   |

[illegible]

[illegible]



[illegible]

[illegible]

[illegible]

[illegible]

[illegible]

[illegible]

[illegible]

[illegible]



[illegible]

[illegible]

|           |                                 |                                                                                                                                                                                                                                                                                                   |
|-----------|---------------------------------|---------------------------------------------------------------------------------------------------------------------------------------------------------------------------------------------------------------------------------------------------------------------------------------------------|
| see above | Lighthouse Lab in Alderley Park | Wellcome Sanger Institute for the COVID-19 Genomics UK (COG-UK) Consortium                                                                                                                                                                                                                        |
|           |                                 | Jacquelyn Wynn, Mairead Hyland, The Lighthouse Lab in Alderley Park and Alex Alderton, Roberto Amato, Sonia Goncalves, Ewan Harrison, David K. Jackson, Ian Johnston, Dominic Kwiatkowski, Cordelia Langford, John Sillitoe on behalf of the Wellcome Sanger Institute COVID-19 Surveillance Team |

[illegible]

|           |                                 |                                                                            |                                                                                                                                                                                                                                                                   |
|-----------|---------------------------------|----------------------------------------------------------------------------|-------------------------------------------------------------------------------------------------------------------------------------------------------------------------------------------------------------------------------------------------------------------|
| see above | Lighthouse Lab in Milton Keynes | Wellcome Sanger Institute for the COVID-19 Genomics UK (COG-UK) Consortium | The Lighthouse Lab in Milton Keynes and Alex Alderton, Roberto Amato, Sonia Gonçalves, Ewan Harrison, David K. Jackson, Ian Johnston, Dominic Kwiatkowski, Cordelia Langford, John Sillitoe on behalf of the Wellcome Sanger Institute COVID-19 Surveillance Team |
|-----------|---------------------------------|----------------------------------------------------------------------------|-------------------------------------------------------------------------------------------------------------------------------------------------------------------------------------------------------------------------------------------------------------------|

[illegible]

|           |                                 |                                                                                                                                                                                                                                                                                                                                                                                 |
|-----------|---------------------------------|---------------------------------------------------------------------------------------------------------------------------------------------------------------------------------------------------------------------------------------------------------------------------------------------------------------------------------------------------------------------------------|
| see above | Lighthouse Lab in Alderley Park | Wellcome Sanger Institute for the COVID-19 Genomics UK (COG-UK) Consortium<br>Jacquelyn Wynn, Mairead Hyland, The Lighthouse Lab in Alderley Park and Alex Alderton, Roberto Amato, Sonia Goncalves, Ewan Harrison, David K. Jackson, Ian Johnston, Dominic Kwiatkowski, Cordelia Langford, John Sillitoe on behalf of the Wellcome Sanger Institute COVID-19 Surveillance Team |
|-----------|---------------------------------|---------------------------------------------------------------------------------------------------------------------------------------------------------------------------------------------------------------------------------------------------------------------------------------------------------------------------------------------------------------------------------|

|                                |                             |                                                                            |                                                                                                                                                                                                                                                                          |
|--------------------------------|-----------------------------|----------------------------------------------------------------------------|--------------------------------------------------------------------------------------------------------------------------------------------------------------------------------------------------------------------------------------------------------------------------|
| EPI_ISL_881620, EPI_ISL_881622 | Lighthouse Lab in Cambridge | Wellcome Sanger Institute for the COVID-19 Genomics UK (COG-UK) Consortium | Rob Howes, The Lighthouse Lab in Cambridge and Alex Alderton, Roberto Amato, Sonia Gonçalves, Ewan Harrison, David K. Jackson, Ian Johnston, Dominic Kwiatkowski, Cordelia Langford, John Sillitoe on behalf of the Wellcome Sanger Institute COVID-19 Surveillance Team |
|--------------------------------|-----------------------------|----------------------------------------------------------------------------|--------------------------------------------------------------------------------------------------------------------------------------------------------------------------------------------------------------------------------------------------------------------------|

|                                                                    |                                 |                                                                            |                                                                                                                                                                                                                                                                                                   |
|--------------------------------------------------------------------|---------------------------------|----------------------------------------------------------------------------|---------------------------------------------------------------------------------------------------------------------------------------------------------------------------------------------------------------------------------------------------------------------------------------------------|
| EPI_ISL_882300, EPI_ISL_882605,<br>EPI_ISL_882606, EPI_ISL_882607, | Lighthouse Lab in Alderley Park | Wellcome Sanger Institute for the COVID-19 Genomics UK (COG-UK) Consortium | Jacquelyn Wynn, Mairead Hyland, The Lighthouse Lab in Alderley Park and Alex Alderton, Roberto Amato, Sonia Goncalves, Ewan Harrison, David K. Jackson, Ian Johnston, Dominic Kwiatkowski, Cordelia Landford, John Sillitoe on behalf of the Wellcome Sanger Institute COVID-19 Surveillance Team |
|--------------------------------------------------------------------|---------------------------------|----------------------------------------------------------------------------|---------------------------------------------------------------------------------------------------------------------------------------------------------------------------------------------------------------------------------------------------------------------------------------------------|

|                |                           |                                                        |                                                                                                                                                 |
|----------------|---------------------------|--------------------------------------------------------|-------------------------------------------------------------------------------------------------------------------------------------------------|
| EPI_ISL_882608 |                           |                                                        |                                                                                                                                                 |
| EPI_ISL_882609 | Lighthouse Lab in Glasgow | Wellcome Sanger Institute for the COVID-19 Genomics UK | Harper VanSteenhouse, Yumi Kasai, David Gray, Carol Clugston, Anna Dominiczak and Alex Alderton, Roberto Amato, Sonia Goncalves, Ewan Harrison. |

(COG-UK) Consortium

EPI\_ISL\_885160, EPI\_ISL\_885163, EPI\_ISL\_885165, EPI\_ISL\_885178, EPI\_ISL\_885180, EPI\_ISL\_885183, EPI\_ISL\_885187, EPI\_ISL\_885189, EPI\_ISL\_885197, EPI\_ISL\_885204, EPI\_ISL\_885209, EPI\_ISL\_885211, EPI\_ISL\_885213, EPI\_ISL\_885214, EPI\_ISL\_885215, EPI\_ISL\_885234, EPI\_ISL\_885236, EPI\_ISL\_885244, EPI\_ISL\_885248, EPI\_ISL\_885250, EPI\_ISL\_885264, EPI\_ISL\_885273, EPI\_ISL\_885274, EPI\_ISL\_885275, EPI\_ISL\_885288, EPI\_ISL\_885289, EPI\_ISL\_885291, EPI\_ISL\_885295, EPI\_ISL\_885297, EPI\_ISL\_885299, EPI\_ISL\_885302, EPI\_ISL\_885305, EPI\_ISL\_885307, EPI\_ISL\_885311, EPI\_ISL\_885317, EPI\_ISL\_885319, EPI\_ISL\_885321, EPI\_ISL\_885323, EPI\_ISL\_885326, EPI\_ISL\_885335, EPI\_ISL\_885337, EPI\_ISL\_885349, EPI\_ISL\_885352, EPI\_ISL\_885353, EPI\_ISL\_885359, EPI\_ISL\_885361, EPI\_ISL\_885364, EPI\_ISL\_885365, EPI\_ISL\_885367, EPI\_ISL\_885369, EPI\_ISL\_885371, EPI\_ISL\_885374, EPI\_ISL\_885376, EPI\_ISL\_885388, EPI\_ISL\_885390, EPI\_ISL\_885392, EPI\_ISL\_885396, EPI\_ISL\_885397, EPI\_ISL\_885402, EPI\_ISL\_885411, EPI\_ISL\_885413, EPI\_ISL\_885419, EPI\_ISL\_885422, EPI\_ISL\_885427, EPI\_ISL\_885431, EPI\_ISL\_885434, EPI\_ISL\_885452, EPI\_ISL\_885455, EPI\_ISL\_885458, EPI\_ISL\_885459, EPI\_ISL\_885461, EPI\_ISL\_885463, EPI\_ISL\_885471, EPI\_ISL\_885472, EPI\_ISL\_885473, EPI\_ISL\_885476, EPI\_ISL\_885478, EPI\_ISL\_885479, EPI\_ISL\_885482, EPI\_ISL\_885484, EPI\_ISL\_885499, EPI\_ISL\_885500, EPI\_ISL\_885503, EPI\_ISL\_885513, EPI\_ISL\_885514, EPI\_ISL\_885543, EPI\_ISL\_885557, EPI\_ISL\_885580, EPI\_ISL\_885586, EPI\_ISL\_885587, EPI\_ISL\_885589, EPI\_ISL\_885597, EPI\_ISL\_885619, EPI\_ISL\_885630, EPI\_ISL\_885637, EPI\_ISL\_885640, EPI\_ISL\_885649, EPI\_ISL\_885655, EPI\_ISL\_885661, EPI\_ISL\_885680, EPI\_ISL\_885683, EPI\_ISL\_885690, EPI\_ISL\_885705, EPI\_ISL\_885725, EPI\_ISL\_885754, EPI\_ISL\_885758, EPI\_ISL\_885762, EPI\_ISL\_885766, EPI\_ISL\_885813, EPI\_ISL\_885828, EPI\_ISL\_885855, EPI\_ISL\_885860, EPI\_ISL\_885867, EPI\_ISL\_885880, EPI\_ISL\_885889, EPI\_ISL\_885912, EPI\_ISL\_885916, EPI\_ISL\_885918, EPI\_ISL\_885935, EPI\_ISL\_885954, EPI\_ISL\_885958, EPI\_ISL\_885962, EPI\_ISL\_885966, EPI\_ISL\_886009, EPI\_ISL\_886056, EPI\_ISL\_886057, EPI\_ISL\_886103, EPI\_ISL\_886121, EPI\_ISL\_886136, EPI\_ISL\_886142, EPI\_ISL\_886143

|                                                                                                                                                                                                                                                                                                                                                                                                                                                                                                                                                                                                                                                                                                                                                                                                                                                                                                                                                                                                                                                                                                                                                                                                                                                                                                                                                                                                                                                                                                                                                                                                                                                                                                                                                                                                                                                                                                                                                                                                                                                                                                                                                                                                                                                                                                                                                                                                                                                                                                                                                                                                                                                                                                                                                                                                                                                                                                                                                                                                                                                                                                                |                                 |                                                                            |                                                                                                                                                                                                                                                                                                             |
|----------------------------------------------------------------------------------------------------------------------------------------------------------------------------------------------------------------------------------------------------------------------------------------------------------------------------------------------------------------------------------------------------------------------------------------------------------------------------------------------------------------------------------------------------------------------------------------------------------------------------------------------------------------------------------------------------------------------------------------------------------------------------------------------------------------------------------------------------------------------------------------------------------------------------------------------------------------------------------------------------------------------------------------------------------------------------------------------------------------------------------------------------------------------------------------------------------------------------------------------------------------------------------------------------------------------------------------------------------------------------------------------------------------------------------------------------------------------------------------------------------------------------------------------------------------------------------------------------------------------------------------------------------------------------------------------------------------------------------------------------------------------------------------------------------------------------------------------------------------------------------------------------------------------------------------------------------------------------------------------------------------------------------------------------------------------------------------------------------------------------------------------------------------------------------------------------------------------------------------------------------------------------------------------------------------------------------------------------------------------------------------------------------------------------------------------------------------------------------------------------------------------------------------------------------------------------------------------------------------------------------------------------------------------------------------------------------------------------------------------------------------------------------------------------------------------------------------------------------------------------------------------------------------------------------------------------------------------------------------------------------------------------------------------------------------------------------------------------------------|---------------------------------|----------------------------------------------------------------------------|-------------------------------------------------------------------------------------------------------------------------------------------------------------------------------------------------------------------------------------------------------------------------------------------------------------|
| see above                                                                                                                                                                                                                                                                                                                                                                                                                                                                                                                                                                                                                                                                                                                                                                                                                                                                                                                                                                                                                                                                                                                                                                                                                                                                                                                                                                                                                                                                                                                                                                                                                                                                                                                                                                                                                                                                                                                                                                                                                                                                                                                                                                                                                                                                                                                                                                                                                                                                                                                                                                                                                                                                                                                                                                                                                                                                                                                                                                                                                                                                                                      | Lighthouse Lab in Alderley Park | Wellcome Sanger Institute for the COVID-19 Genomics UK (COG-UK) Consortium | Jacquelyn Wynn, Mairead Hyland, The Lighthouse Lab in Alderley Park and Alex Alderton, Roberto Amato, Sonia Goncalves, Ewan Harrison, David K. Jackson, Ian Johnston, Dominic Kwiatkowski, Cordelia Langford, John Sillitoe on behalf of the Wellcome Sanger Institute COVID-19 Surveillance Team           |
| EPI_ISL_891700                                                                                                                                                                                                                                                                                                                                                                                                                                                                                                                                                                                                                                                                                                                                                                                                                                                                                                                                                                                                                                                                                                                                                                                                                                                                                                                                                                                                                                                                                                                                                                                                                                                                                                                                                                                                                                                                                                                                                                                                                                                                                                                                                                                                                                                                                                                                                                                                                                                                                                                                                                                                                                                                                                                                                                                                                                                                                                                                                                                                                                                                                                 | Lighthouse Lab in Glasgow       | Wellcome Sanger Institute for the COVID-19 Genomics UK (COG-UK) Consortium | Harper VanSteenhouse, Yumi Kasai, David Gray, Carol Clugston, Anna Dominiczak and Alex Alderton, Roberto Amato, Sonia Goncalves, Ewan Harrison, David K. Jackson, Ian Johnston, Dominic Kwiatkowski, Cordelia Langford, John Sillitoe on behalf of the Wellcome Sanger Institute COVID-19 Surveillance Team |
| EPI_ISL_891899, EPI_ISL_891901, EPI_ISL_891903, EPI_ISL_891905, EPI_ISL_891908, EPI_ISL_891909, EPI_ISL_891914, EPI_ISL_891918, EPI_ISL_891920, EPI_ISL_891921, EPI_ISL_891923, EPI_ISL_891924, EPI_ISL_891925, EPI_ISL_891926, EPI_ISL_891927, EPI_ISL_891928, EPI_ISL_891929, EPI_ISL_891930, EPI_ISL_891931, EPI_ISL_891932, EPI_ISL_891933, EPI_ISL_891934, EPI_ISL_891935, EPI_ISL_891936, EPI_ISL_891937, EPI_ISL_891938, EPI_ISL_891939, EPI_ISL_891940, EPI_ISL_891941, EPI_ISL_891942, EPI_ISL_891943, EPI_ISL_891944, EPI_ISL_891945, EPI_ISL_891946, EPI_ISL_891949, EPI_ISL_891950, EPI_ISL_891953, EPI_ISL_891954, EPI_ISL_891957, EPI_ISL_891958, EPI_ISL_891959, EPI_ISL_891962, EPI_ISL_891963, EPI_ISL_891967, EPI_ISL_891969, EPI_ISL_891970, EPI_ISL_891972, EPI_ISL_891973, EPI_ISL_891974, EPI_ISL_891975, EPI_ISL_891976, EPI_ISL_891977, EPI_ISL_891978, EPI_ISL_891979, EPI_ISL_891980, EPI_ISL_891981, EPI_ISL_891982, EPI_ISL_891983, EPI_ISL_891984, EPI_ISL_891985, EPI_ISL_891986, EPI_ISL_891987, EPI_ISL_891988, EPI_ISL_891989, EPI_ISL_891990, EPI_ISL_891991, EPI_ISL_891992, EPI_ISL_891993, EPI_ISL_891994, EPI_ISL_891995, EPI_ISL_891996, EPI_ISL_891997, EPI_ISL_891998, EPI_ISL_891999, EPI_ISL_892000, EPI_ISL_892001, EPI_ISL_892002, EPI_ISL_892003, EPI_ISL_892004, EPI_ISL_892005, EPI_ISL_892006, EPI_ISL_892007, EPI_ISL_892008, EPI_ISL_892009, EPI_ISL_892012, EPI_ISL_892013, EPI_ISL_892014, EPI_ISL_892015, EPI_ISL_892016, EPI_ISL_892017, EPI_ISL_892018, EPI_ISL_892019, EPI_ISL_892020, EPI_ISL_892021, EPI_ISL_892022, EPI_ISL_892023, EPI_ISL_892024, EPI_ISL_892025, EPI_ISL_892026, EPI_ISL_892027, EPI_ISL_892028, EPI_ISL_892029, EPI_ISL_892030, EPI_ISL_892031, EPI_ISL_892032, EPI_ISL_892033, EPI_ISL_892034, EPI_ISL_892035, EPI_ISL_892036, EPI_ISL_892037, EPI_ISL_892038, EPI_ISL_892039, EPI_ISL_892040, EPI_ISL_892041, EPI_ISL_892042, EPI_ISL_892043, EPI_ISL_892044, EPI_ISL_892045, EPI_ISL_892046, EPI_ISL_892047, EPI_ISL_892048, EPI_ISL_892049, EPI_ISL_892056, EPI_ISL_892127, EPI_ISL_892128, EPI_ISL_892129, EPI_ISL_892130, EPI_ISL_892131, EPI_ISL_892132, EPI_ISL_892133, EPI_ISL_892134, EPI_ISL_892135, EPI_ISL_892136, EPI_ISL_892137, EPI_ISL_892138, EPI_ISL_892139, EPI_ISL_892140, EPI_ISL_892141, EPI_ISL_892142, EPI_ISL_892143, EPI_ISL_892144, EPI_ISL_892145, EPI_ISL_892146, EPI_ISL_892147, EPI_ISL_892148, EPI_ISL_892149, EPI_ISL_892150, EPI_ISL_892151, EPI_ISL_892152, EPI_ISL_892153, EPI_ISL_892154, EPI_ISL_892155, EPI_ISL_892156, EPI_ISL_892157, EPI_ISL_892158, EPI_ISL_892159, EPI_ISL_892160, EPI_ISL_892161, EPI_ISL_892162, EPI_ISL_892163, EPI_ISL_892164, EPI_ISL_892165, EPI_ISL_892166, EPI_ISL_892167, EPI_ISL_892168, EPI_ISL_892169, EPI_ISL_892170, EPI_ISL_892171, EPI_ISL_892172, EPI_ISL_892173, EPI_ISL_892174, EPI_ISL_892175, EPI_ISL_892176, EPI_ISL_892177, EPI_ISL_892178, EPI_ISL_892180, EPI_ISL_892181, EPI_ISL_892182, EPI_ISL_892183, EPI_ISL_892184, EPI_ISL_892185, EPI_ISL_892186, EPI_ISL_892187, EPI_ISL_892188, EPI_ISL_892198, EPI_ISL_892199, EPI_ISL_892200 |                                 |                                                                            |                                                                                                                                                                                                                                                                                                             |
| see above                                                                                                                                                                                                                                                                                                                                                                                                                                                                                                                                                                                                                                                                                                                                                                                                                                                                                                                                                                                                                                                                                                                                                                                                                                                                                                                                                                                                                                                                                                                                                                                                                                                                                                                                                                                                                                                                                                                                                                                                                                                                                                                                                                                                                                                                                                                                                                                                                                                                                                                                                                                                                                                                                                                                                                                                                                                                                                                                                                                                                                                                                                      | Lighthouse Lab in Alderley Park | Wellcome Sanger Institute for the COVID-19 Genomics UK (COG-UK) Consortium | Jacquelyn Wynn, Mairead Hyland, The Lighthouse Lab in Alderley Park and Alex Alderton, Roberto Amato, Sonia Goncalves, Ewan Harrison, David K. Jackson, Ian Johnston, Dominic Kwiatkowski, Cordelia Langford, John Sillitoe on behalf of the Wellcome Sanger Institute COVID-19 Surveillance Team           |
| EPI_ISL_892201                                                                                                                                                                                                                                                                                                                                                                                                                                                                                                                                                                                                                                                                                                                                                                                                                                                                                                                                                                                                                                                                                                                                                                                                                                                                                                                                                                                                                                                                                                                                                                                                                                                                                                                                                                                                                                                                                                                                                                                                                                                                                                                                                                                                                                                                                                                                                                                                                                                                                                                                                                                                                                                                                                                                                                                                                                                                                                                                                                                                                                                                                                 | Lighthouse Lab in Glasgow       | Wellcome Sanger Institute for the COVID-19 Genomics UK (COG-UK) Consortium | Harper VanSteenhouse, Yumi Kasai, David Gray, Carol Clugston, Anna Dominiczak and Alex Alderton, Roberto Amato, Sonia Goncalves, Ewan Harrison, David K. Jackson, Ian Johnston, Dominic Kwiatkowski, Cordelia Langford, John Sillitoe on behalf of the Wellcome Sanger Institute COVID-19 Surveillance Team |
| EPI_ISL_892202, EPI_ISL_892203, EPI_ISL_892204, EPI_ISL_892205                                                                                                                                                                                                                                                                                                                                                                                                                                                                                                                                                                                                                                                                                                                                                                                                                                                                                                                                                                                                                                                                                                                                                                                                                                                                                                                                                                                                                                                                                                                                                                                                                                                                                                                                                                                                                                                                                                                                                                                                                                                                                                                                                                                                                                                                                                                                                                                                                                                                                                                                                                                                                                                                                                                                                                                                                                                                                                                                                                                                                                                 | Lighthouse Lab in Alderley Park | Wellcome Sanger Institute for the COVID-19 Genomics UK (COG-UK) Consortium | Jacquelyn Wynn, Mairead Hyland, The Lighthouse Lab in Alderley Park and Alex Alderton, Roberto Amato, Sonia Goncalves, Ewan Harrison, David K. Jackson, Ian Johnston, Dominic Kwiatkowski, Cordelia Langford, John Sillitoe on behalf of the Wellcome Sanger Institute COVID-19 Surveillance Team           |
| EPI_ISL_908934, EPI_ISL_908936, EPI_ISL_908943, EPI_ISL_908960, EPI_ISL_908966, EPI_ISL_908969, EPI_ISL_908971, EPI_ISL_908972, EPI_ISL_908973, EPI_ISL_908975, EPI_ISL_908976, EPI_ISL_908980, EPI_ISL_908981, EPI_ISL_908984, EPI_ISL_908994, EPI_ISL_909000, EPI_ISL_909001, EPI_ISL_909012, EPI_ISL_909020, EPI_ISL_909025, EPI_ISL_909028, EPI_ISL_909032, EPI_ISL_909033, EPI_ISL_909039, EPI_ISL_909042, EPI_ISL_909045, EPI_ISL_909055, EPI_ISL_909064, EPI_ISL_909073, EPI_ISL_909074, EPI_ISL_909077, EPI_ISL_909092, EPI_ISL_909098, EPI_ISL_909100, EPI_ISL_909104, EPI_ISL_909112, EPI_ISL_909115, EPI_ISL_909126, EPI_ISL_909134, EPI_ISL_909135, EPI_ISL_909138, EPI_ISL_909140, EPI_ISL_909141, EPI_ISL_909142, EPI_ISL_909143, EPI_ISL_909151, EPI_ISL_909161, EPI_ISL_909163, EPI_ISL_909164, EPI_ISL_909165, EPI_ISL_909175, EPI_ISL_909183, EPI_ISL_909188, EPI_ISL_909190, EPI_ISL_909196, EPI_ISL_909199, EPI_ISL_909209, EPI_ISL_909213, EPI_ISL_909221, EPI_ISL_909225, EPI_ISL_909229, EPI_ISL_909232, EPI_ISL_909239, EPI_ISL_909244, EPI_ISL_909249, EPI_ISL_909253, EPI_ISL_909258, EPI_ISL_909264, EPI_ISL_909404, EPI_ISL_909495                                                                                                                                                                                                                                                                                                                                                                                                                                                                                                                                                                                                                                                                                                                                                                                                                                                                                                                                                                                                                                                                                                                                                                                                                                                                                                                                                                                                                                                                                                                                                                                                                                                                                                                                                                                                                                                                                                                                                 |                                 |                                                                            |                                                                                                                                                                                                                                                                                                             |
| see above                                                                                                                                                                                                                                                                                                                                                                                                                                                                                                                                                                                                                                                                                                                                                                                                                                                                                                                                                                                                                                                                                                                                                                                                                                                                                                                                                                                                                                                                                                                                                                                                                                                                                                                                                                                                                                                                                                                                                                                                                                                                                                                                                                                                                                                                                                                                                                                                                                                                                                                                                                                                                                                                                                                                                                                                                                                                                                                                                                                                                                                                                                      | Lighthouse Lab in Milton Keynes | Wellcome Sanger Institute for the COVID-19 Genomics UK (COG-UK) Consortium | The Lighthouse Lab in Milton Keynes and Alex Alderton, Roberto Amato, Sonia Goncalves, Ewan Harrison, David K. Jackson, Ian Johnston, Dominic Kwiatkowski, Cordelia Langford, John Sillitoe on behalf of the Wellcome Sanger Institute COVID-19 Surveillance Team                                           |
| EPI_ISL_909594                                                                                                                                                                                                                                                                                                                                                                                                                                                                                                                                                                                                                                                                                                                                                                                                                                                                                                                                                                                                                                                                                                                                                                                                                                                                                                                                                                                                                                                                                                                                                                                                                                                                                                                                                                                                                                                                                                                                                                                                                                                                                                                                                                                                                                                                                                                                                                                                                                                                                                                                                                                                                                                                                                                                                                                                                                                                                                                                                                                                                                                                                                 | Lighthouse Lab in Alderley Park | Wellcome Sanger Institute for the COVID-19 Genomics UK (COG-UK) Consortium | Jacquelyn Wynn, Mairead Hyland, The Lighthouse Lab in Alderley Park and Alex Alderton, Roberto Amato, Sonia Goncalves, Ewan Harrison, David K. Jackson, Ian Johnston, Dominic Kwiatkowski, Cordelia Langford, John Sillitoe on behalf of the Wellcome Sanger Institute COVID-19 Surveillance Team           |
| EPI_ISL_912225                                                                                                                                                                                                                                                                                                                                                                                                                                                                                                                                                                                                                                                                                                                                                                                                                                                                                                                                                                                                                                                                                                                                                                                                                                                                                                                                                                                                                                                                                                                                                                                                                                                                                                                                                                                                                                                                                                                                                                                                                                                                                                                                                                                                                                                                                                                                                                                                                                                                                                                                                                                                                                                                                                                                                                                                                                                                                                                                                                                                                                                                                                 | Lighthouse                      |                                                                            |                                                                                                                                                                                                                                                                                                             |

[illegible]

[illegible]

[illegible]

[illegible]

[illegible]



[illegible]

[illegible]

[illegible]

|                                                                                                                                                                                                                                                                                                                                                                                                                                                                                                                                                                                                                                                                                                                                                                                                                                                                                                                                                                                                                                                                                                                                                                                                                                                                                                                                                                                                                                                                                                                                                                                                                                                                                                                                                                                                                                                                                                                                                                                                                                                                                                                                                                                                                                                                                                                                                                                                                                                                                                                                                                                                                                                                                                                                                                                                                                                                                                                                                                                                                                                                                                                                                                                                                                                                                                                                                                                                                                                                                                                                                                                                                                                                                                                                                                                                                                                                                                                                                                                                                                                                                                                                                                                                                                                                                                                                                                                                                                                                                                                                                                                                                                                                                                                                                                                                                                                                                                                                                                                                                                                                                                                                                                                                                                                                                                                                                                                                                                                                                                                                                                                                                                                                                                                                                                                                                                                                                                                                                                                                                                                                                                                                                                                                                                                                                                                                                                                                                                                                                                                                                                                                                                                                                                                                                                                                                                                                                                                                                                                                                                                                                                                                                                                                                                                                                                                                                                                                                                                                                                                                                                                                                                                                                                                                                                                                                                                                                                                                                                                                                                                                                                                                                                                                                                                                                                                                                                                                                                                                                                                                                                                                                                                                                |           |                                                                                                                                                                                                 |                                                                            |                                                                                                                                                                                                                                                                                                                                                                                                                                         |
|--------------------------------------------------------------------------------------------------------------------------------------------------------------------------------------------------------------------------------------------------------------------------------------------------------------------------------------------------------------------------------------------------------------------------------------------------------------------------------------------------------------------------------------------------------------------------------------------------------------------------------------------------------------------------------------------------------------------------------------------------------------------------------------------------------------------------------------------------------------------------------------------------------------------------------------------------------------------------------------------------------------------------------------------------------------------------------------------------------------------------------------------------------------------------------------------------------------------------------------------------------------------------------------------------------------------------------------------------------------------------------------------------------------------------------------------------------------------------------------------------------------------------------------------------------------------------------------------------------------------------------------------------------------------------------------------------------------------------------------------------------------------------------------------------------------------------------------------------------------------------------------------------------------------------------------------------------------------------------------------------------------------------------------------------------------------------------------------------------------------------------------------------------------------------------------------------------------------------------------------------------------------------------------------------------------------------------------------------------------------------------------------------------------------------------------------------------------------------------------------------------------------------------------------------------------------------------------------------------------------------------------------------------------------------------------------------------------------------------------------------------------------------------------------------------------------------------------------------------------------------------------------------------------------------------------------------------------------------------------------------------------------------------------------------------------------------------------------------------------------------------------------------------------------------------------------------------------------------------------------------------------------------------------------------------------------------------------------------------------------------------------------------------------------------------------------------------------------------------------------------------------------------------------------------------------------------------------------------------------------------------------------------------------------------------------------------------------------------------------------------------------------------------------------------------------------------------------------------------------------------------------------------------------------------------------------------------------------------------------------------------------------------------------------------------------------------------------------------------------------------------------------------------------------------------------------------------------------------------------------------------------------------------------------------------------------------------------------------------------------------------------------------------------------------------------------------------------------------------------------------------------------------------------------------------------------------------------------------------------------------------------------------------------------------------------------------------------------------------------------------------------------------------------------------------------------------------------------------------------------------------------------------------------------------------------------------------------------------------------------------------------------------------------------------------------------------------------------------------------------------------------------------------------------------------------------------------------------------------------------------------------------------------------------------------------------------------------------------------------------------------------------------------------------------------------------------------------------------------------------------------------------------------------------------------------------------------------------------------------------------------------------------------------------------------------------------------------------------------------------------------------------------------------------------------------------------------------------------------------------------------------------------------------------------------------------------------------------------------------------------------------------------------------------------------------------------------------------------------------------------------------------------------------------------------------------------------------------------------------------------------------------------------------------------------------------------------------------------------------------------------------------------------------------------------------------------------------------------------------------------------------------------------------------------------------------------------------------------------------------------------------------------------------------------------------------------------------------------------------------------------------------------------------------------------------------------------------------------------------------------------------------------------------------------------------------------------------------------------------------------------------------------------------------------------------------------------------------------------------------------------------------------------------------------------------------------------------------------------------------------------------------------------------------------------------------------------------------------------------------------------------------------------------------------------------------------------------------------------------------------------------------------------------------------------------------------------------------------------------------------------------------------------------------------------------------------------------------------------------------------------------------------------------------------------------------------------------------------------------------------------------------------------------------------------------------------------------------------------------------------------------------------------------------------------------------------------------------------------------------------------------------------------------------------------------------------------------------------------------------------------------------------------------------------------------------------------------------------------------------------------------------------------------------------------------------------------------------------------------------------------------------------------------------------------------------------------------------------------------------------------------------------------------------------------|-----------|-------------------------------------------------------------------------------------------------------------------------------------------------------------------------------------------------|----------------------------------------------------------------------------|-----------------------------------------------------------------------------------------------------------------------------------------------------------------------------------------------------------------------------------------------------------------------------------------------------------------------------------------------------------------------------------------------------------------------------------------|
| EPI_ISL_918062, EPI_ISL_918063, EPI_ISL_918064, EPI_ISL_918065, EPI_ISL_918066, EPI_ISL_918067, EPI_ISL_918068, EPI_ISL_918069, EPI_ISL_918070, EPI_ISL_918071, EPI_ISL_918072, EPI_ISL_918073, EPI_ISL_918074, EPI_ISL_918075, EPI_ISL_918076, EPI_ISL_918077, EPI_ISL_918078, EPI_ISL_918079, EPI_ISL_918080, EPI_ISL_918081, EPI_ISL_918082, EPI_ISL_918083, EPI_ISL_918084, EPI_ISL_918085, EPI_ISL_918086, EPI_ISL_918087, EPI_ISL_918088, EPI_ISL_918089, EPI_ISL_918090, EPI_ISL_918091, EPI_ISL_918092, EPI_ISL_918093, EPI_ISL_918094, EPI_ISL_918095, EPI_ISL_918096, EPI_ISL_918097, EPI_ISL_918098, EPI_ISL_918099, EPI_ISL_918100, EPI_ISL_918101, EPI_ISL_918102, EPI_ISL_918103, EPI_ISL_918104, EPI_ISL_918105, EPI_ISL_918106, EPI_ISL_918107, EPI_ISL_918108, EPI_ISL_918109, EPI_ISL_918110, EPI_ISL_918111, EPI_ISL_918112, EPI_ISL_918113, EPI_ISL_918114, EPI_ISL_918115, EPI_ISL_918116, EPI_ISL_918117, EPI_ISL_918118, EPI_ISL_918119, EPI_ISL_918120, EPI_ISL_918121, EPI_ISL_918122, EPI_ISL_918123, EPI_ISL_918124                                                                                                                                                                                                                                                                                                                                                                                                                                                                                                                                                                                                                                                                                                                                                                                                                                                                                                                                                                                                                                                                                                                                                                                                                                                                                                                                                                                                                                                                                                                                                                                                                                                                                                                                                                                                                                                                                                                                                                                                                                                                                                                                                                                                                                                                                                                                                                                                                                                                                                                                                                                                                                                                                                                                                                                                                                                                                                                                                                                                                                                                                                                                                                                                                                                                                                                                                                                                                                                                                                                                                                                                                                                                                                                                                                                                                                                                                                                                                                                                                                                                                                                                                                                                                                                                                                                                                                                                                                                                                                                                                                                                                                                                                                                                                                                                                                                                                                                                                                                                                                                                                                                                                                                                                                                                                                                                                                                                                                                                                                                                                                                                                                                                                                                                                                                                                                                                                                                                                                                                                                                                                                                                                                                                                                                                                                                                                                                                                                                                                                                                                                                                                                                                                                                                                                                                                                                                                                                                                                                                                                                                                                                                                                                                                                                                                                                                                                                                                                                                                                                                                                                                                                 | see above | Lighthouse Lab in Glasgow                                                                                                                                                                       | Wellcome Sanger Institute for the COVID-19 Genomics UK (COG-UK) Consortium | Harper VanSteenhouse, Yumi Kasai, David Gray, Carol Clugston, Anna Dominicczak and Alex Alderton, Roberto Amato, Sonia Goncalves, Ewan Harrison, David K. Jackson, Ian Johnston, Dominic Kwiatkowski, Cordelia Langford, John Sillitoe on behalf of the Wellcome Sanger Institute COVID-19 Surveillance Team                                                                                                                            |
| EPI_ISL_918764, EPI_ISL_918765, EPI_ISL_918766, EPI_ISL_918767, EPI_ISL_918768, EPI_ISL_918769, EPI_ISL_918770, EPI_ISL_918771, EPI_ISL_918772, EPI_ISL_918773, EPI_ISL_918774, EPI_ISL_918776, EPI_ISL_918777, EPI_ISL_918778, EPI_ISL_918780, EPI_ISL_918781, EPI_ISL_918782, EPI_ISL_918783, EPI_ISL_918784, EPI_ISL_918785, EPI_ISL_918786, EPI_ISL_918787, EPI_ISL_918788, EPI_ISL_918789, EPI_ISL_918790, EPI_ISL_918791, EPI_ISL_918792, EPI_ISL_918793, EPI_ISL_918794, EPI_ISL_918795, EPI_ISL_918796, EPI_ISL_918797, EPI_ISL_918798, EPI_ISL_918799, EPI_ISL_918800, EPI_ISL_918801, EPI_ISL_918802, EPI_ISL_918803, EPI_ISL_918804, EPI_ISL_918805, EPI_ISL_918806, EPI_ISL_918807, EPI_ISL_918808, EPI_ISL_918809, EPI_ISL_918810, EPI_ISL_918811, EPI_ISL_918812, EPI_ISL_918813, EPI_ISL_918814, EPI_ISL_918815, EPI_ISL_918816, EPI_ISL_918817, EPI_ISL_918818, EPI_ISL_918819, EPI_ISL_918820, EPI_ISL_918821, EPI_ISL_918822, EPI_ISL_918823, EPI_ISL_918824, EPI_ISL_918825, EPI_ISL_918826, EPI_ISL_918827, EPI_ISL_918828, EPI_ISL_918829, EPI_ISL_918830, EPI_ISL_918831, EPI_ISL_918832, EPI_ISL_918833                                                                                                                                                                                                                                                                                                                                                                                                                                                                                                                                                                                                                                                                                                                                                                                                                                                                                                                                                                                                                                                                                                                                                                                                                                                                                                                                                                                                                                                                                                                                                                                                                                                                                                                                                                                                                                                                                                                                                                                                                                                                                                                                                                                                                                                                                                                                                                                                                                                                                                                                                                                                                                                                                                                                                                                                                                                                                                                                                                                                                                                                                                                                                                                                                                                                                                                                                                                                                                                                                                                                                                                                                                                                                                                                                                                                                                                                                                                                                                                                                                                                                                                                                                                                                                                                                                                                                                                                                                                                                                                                                                                                                                                                                                                                                                                                                                                                                                                                                                                                                                                                                                                                                                                                                                                                                                                                                                                                                                                                                                                                                                                                                                                                                                                                                                                                                                                                                                                                                                                                                                                                                                                                                                                                                                                                                                                                                                                                                                                                                                                                                                                                                                                                                                                                                                                                                                                                                                                                                                                                                                                                                                                                                                                                                                                                                                                                                                                                                                                                                                                                                 | see above | University of Birmingham                                                                                                                                                                        | COVID-19 Genomics UK (COG-UK) Consortium                                   | Institute of Microbiology, University of Birmingham: Claire McMurray, Joanne Stockton, Samuel Nicholls, Radoslaw Poplawski, Will Rowe, Josh Quick, Nicholas Loman. University of Birmingham Testing Laboratory: Celina M Whalley, Andrew Bosworth, Charlotte Poxon, Kasun Wanigasooriya, Oliver Pickles, Mike Kidd, Alex Richter, Andrew D Beggs PHE Heartlands Lab: Husam Osman, Andrew Bosworth. Queen Elizabeth Hospital: Anna Casey |
| EPI_ISL_919057, EPI_ISL_919059, EPI_ISL_919060, EPI_ISL_919061, EPI_ISL_919064, EPI_ISL_919065, EPI_ISL_919066, EPI_ISL_919068, EPI_ISL_919069, EPI_ISL_919072, EPI_ISL_919076, EPI_ISL_919078, EPI_ISL_919083, EPI_ISL_919085, EPI_ISL_919086, EPI_ISL_919088, EPI_ISL_919090, EPI_ISL_919094, EPI_ISL_919096, EPI_ISL_919098, EPI_ISL_919100                                                                                                                                                                                                                                                                                                                                                                                                                                                                                                                                                                                                                                                                                                                                                                                                                                                                                                                                                                                                                                                                                                                                                                                                                                                                                                                                                                                                                                                                                                                                                                                                                                                                                                                                                                                                                                                                                                                                                                                                                                                                                                                                                                                                                                                                                                                                                                                                                                                                                                                                                                                                                                                                                                                                                                                                                                                                                                                                                                                                                                                                                                                                                                                                                                                                                                                                                                                                                                                                                                                                                                                                                                                                                                                                                                                                                                                                                                                                                                                                                                                                                                                                                                                                                                                                                                                                                                                                                                                                                                                                                                                                                                                                                                                                                                                                                                                                                                                                                                                                                                                                                                                                                                                                                                                                                                                                                                                                                                                                                                                                                                                                                                                                                                                                                                                                                                                                                                                                                                                                                                                                                                                                                                                                                                                                                                                                                                                                                                                                                                                                                                                                                                                                                                                                                                                                                                                                                                                                                                                                                                                                                                                                                                                                                                                                                                                                                                                                                                                                                                                                                                                                                                                                                                                                                                                                                                                                                                                                                                                                                                                                                                                                                                                                                                                                                                                                 | see above | Department of Pathology, University of Cambridge                                                                                                                                                | COVID-19 Genomics UK (COG-UK) Consortium                                   | Aminu S. Jahun, Yasmin Chaudhry, Iliana Georgana, Myra Hosmillo, Rhys Izu, Martin D. Curran, Surendra Parmar, Ian Goodfellow                                                                                                                                                                                                                                                                                                            |
| EPI_ISL_919198, EPI_ISL_919199, EPI_ISL_919200, EPI_ISL_919201, EPI_ISL_919202, EPI_ISL_919203, EPI_ISL_919204, EPI_ISL_919205, EPI_ISL_919206, EPI_ISL_919207, EPI_ISL_919209, EPI_ISL_919210, EPI_ISL_919211, EPI_ISL_919212                                                                                                                                                                                                                                                                                                                                                                                                                                                                                                                                                                                                                                                                                                                                                                                                                                                                                                                                                                                                                                                                                                                                                                                                                                                                                                                                                                                                                                                                                                                                                                                                                                                                                                                                                                                                                                                                                                                                                                                                                                                                                                                                                                                                                                                                                                                                                                                                                                                                                                                                                                                                                                                                                                                                                                                                                                                                                                                                                                                                                                                                                                                                                                                                                                                                                                                                                                                                                                                                                                                                                                                                                                                                                                                                                                                                                                                                                                                                                                                                                                                                                                                                                                                                                                                                                                                                                                                                                                                                                                                                                                                                                                                                                                                                                                                                                                                                                                                                                                                                                                                                                                                                                                                                                                                                                                                                                                                                                                                                                                                                                                                                                                                                                                                                                                                                                                                                                                                                                                                                                                                                                                                                                                                                                                                                                                                                                                                                                                                                                                                                                                                                                                                                                                                                                                                                                                                                                                                                                                                                                                                                                                                                                                                                                                                                                                                                                                                                                                                                                                                                                                                                                                                                                                                                                                                                                                                                                                                                                                                                                                                                                                                                                                                                                                                                                                                                                                                                                                                 | see above | West of Scotland Specialist Virology Centre, NHSGCG / MRC-University of Glasgow Centre for Virus Research                                                                                       | COVID-19 Genomics UK (COG-UK) Consortium                                   | Ana da Silva Filipe, Natasha Johnson, Kathy Smollett, Daniel Mair, Stephen Carmichael, Alice Broos, Lily Tong, Jenna Nichols, Kyriaki Nomikou; Sarah McDonald; Richard Orton, Joseph Hughes, Sreenu Vattipally, David L Robertson; Alasdair MacLean, Rory Gunson; Sharif Shaaban, Matthew Holden; Rachel Blacow, Guy Mollett, Kathy Li, James Shepherd, Antonia Ho, Emma Thomson                                                        |
| EPI_ISL_919339, EPI_ISL_919340, EPI_ISL_919341, EPI_ISL_919342                                                                                                                                                                                                                                                                                                                                                                                                                                                                                                                                                                                                                                                                                                                                                                                                                                                                                                                                                                                                                                                                                                                                                                                                                                                                                                                                                                                                                                                                                                                                                                                                                                                                                                                                                                                                                                                                                                                                                                                                                                                                                                                                                                                                                                                                                                                                                                                                                                                                                                                                                                                                                                                                                                                                                                                                                                                                                                                                                                                                                                                                                                                                                                                                                                                                                                                                                                                                                                                                                                                                                                                                                                                                                                                                                                                                                                                                                                                                                                                                                                                                                                                                                                                                                                                                                                                                                                                                                                                                                                                                                                                                                                                                                                                                                                                                                                                                                                                                                                                                                                                                                                                                                                                                                                                                                                                                                                                                                                                                                                                                                                                                                                                                                                                                                                                                                                                                                                                                                                                                                                                                                                                                                                                                                                                                                                                                                                                                                                                                                                                                                                                                                                                                                                                                                                                                                                                                                                                                                                                                                                                                                                                                                                                                                                                                                                                                                                                                                                                                                                                                                                                                                                                                                                                                                                                                                                                                                                                                                                                                                                                                                                                                                                                                                                                                                                                                                                                                                                                                                                                                                                                                                 |           | Virology Department, Royal Infirmary of Edinburgh, NHS Lothian / School of Biological Sciences, University of Edinburgh / Institute of Genetics and Molecular Medicine, University of Edinburgh | COVID-19 Genomics UK (COG-UK) Consortium                                   | McHugh M, Dewar R, Rooke S, Gallagher M, Balcaza C, O'Toole Á, Scher E, Hill V, McCrone JT, Colquhoun R, Yu X, Jackson B, Rambaut A, Williams TC, Templeton K                                                                                                                                                                                                                                                                           |
| EPI_ISL_919479, EPI_ISL_919480, EPI_ISL_919481, EPI_ISL_919482, EPI_ISL_919483, EPI_ISL_919484, EPI_ISL_919485, EPI_ISL_919486, EPI_ISL_919487, EPI_ISL_919488, EPI_ISL_919489, EPI_ISL_919490, EPI_ISL_919491, EPI_ISL_919492, EPI_ISL_919493, EPI_ISL_919494, EPI_ISL_919495, EPI_ISL_919496, EPI_ISL_919497, EPI_ISL_919498, EPI_ISL_919499, EPI_ISL_919500, EPI_ISL_919501, EPI_ISL_919502, EPI_ISL_919503, EPI_ISL_919504, EPI_ISL_919505, EPI_ISL_919506, EPI_ISL_919507, EPI_ISL_919508, EPI_ISL_919509, EPI_ISL_919510, EPI_ISL_919511, EPI_ISL_919512, EPI_ISL_919513, EPI_ISL_919514, EPI_ISL_919515, EPI_ISL_919516, EPI_ISL_919517, EPI_ISL_919518, EPI_ISL_919519, EPI_ISL_919520, EPI_ISL_919521, EPI_ISL_919522, EPI_ISL_919523, EPI_ISL_919524, EPI_ISL_919525, EPI_ISL_919526, EPI_ISL_919527, EPI_ISL_919528, EPI_ISL_919529, EPI_ISL_919530, EPI_ISL_919531, EPI_ISL_919532, EPI_ISL_919533, EPI_ISL_919534, EPI_ISL_919535, EPI_ISL_919536, EPI_ISL_919537, EPI_ISL_919538, EPI_ISL_919539, EPI_ISL_919540, EPI_ISL_919541, EPI_ISL_919542, EPI_ISL_919543, EPI_ISL_919544, EPI_ISL_919545, EPI_ISL_919546, EPI_ISL_919547, EPI_ISL_919548, EPI_ISL_919549, EPI_ISL_919550, EPI_ISL_919551, EPI_ISL_919552, EPI_ISL_919553, EPI_ISL_919554, EPI_ISL_919555, EPI_ISL_919556, EPI_ISL_919557, EPI_ISL_919558, EPI_ISL_919559, EPI_ISL_919560, EPI_ISL_919561, EPI_ISL_919562, EPI_ISL_919563, EPI_ISL_919564, EPI_ISL_919565, EPI_ISL_919566, EPI_ISL_919567, EPI_ISL_919568, EPI_ISL_919569, EPI_ISL_919570, EPI_ISL_919571, EPI_ISL_919572, EPI_ISL_919573, EPI_ISL_919574, EPI_ISL_919575, EPI_ISL_919576, EPI_ISL_919577, EPI_ISL_919578, EPI_ISL_919579, EPI_ISL_919580, EPI_ISL_919581, EPI_ISL_919582, EPI_ISL_919583, EPI_ISL_919584, EPI_ISL_919585, EPI_ISL_919586, EPI_ISL_919587, EPI_ISL_919588, EPI_ISL_919589, EPI_ISL_919590, EPI_ISL_919591, EPI_ISL_919592, EPI_ISL_919593, EPI_ISL_919594, EPI_ISL_919595, EPI_ISL_919596, EPI_ISL_919597, EPI_ISL_919598, EPI_ISL_919599, EPI_ISL_919600, EPI_ISL_919601, EPI_ISL_919602, EPI_ISL_919603, EPI_ISL_919604, EPI_ISL_919605, EPI_ISL_919606, EPI_ISL_919607, EPI_ISL_919608, EPI_ISL_919609, EPI_ISL_919610, EPI_ISL_919611, EPI_ISL_919612, EPI_ISL_919613, EPI_ISL_919614, EPI_ISL_919615, EPI_ISL_919616, EPI_ISL_919617, EPI_ISL_919618, EPI_ISL_919619, EPI_ISL_919620, EPI_ISL_919621, EPI_ISL_919622, EPI_ISL_919623, EPI_ISL_919624, EPI_ISL_919625, EPI_ISL_919626, EPI_ISL_919627, EPI_ISL_919628, EPI_ISL_919629, EPI_ISL_919630, EPI_ISL_919631, EPI_ISL_919632, EPI_ISL_919633, EPI_ISL_919634, EPI_ISL_919635, EPI_ISL_919636, EPI_ISL_919637, EPI_ISL_919638, EPI_ISL_919639, EPI_ISL_919640, EPI_ISL_919641, EPI_ISL_919642, EPI_ISL_919643, EPI_ISL_919644, EPI_ISL_919645, EPI_ISL_919646, EPI_ISL_919647, EPI_ISL_919648, EPI_ISL_919649, EPI_ISL_919650, EPI_ISL_919651, EPI_ISL_919652, EPI_ISL_919653, EPI_ISL_919654, EPI_ISL_919655, EPI_ISL_919656, EPI_ISL_919657, EPI_ISL_919658, EPI_ISL_919659, EPI_ISL_919660, EPI_ISL_919661, EPI_ISL_919662, EPI_ISL_919663, EPI_ISL_919664, EPI_ISL_919665, EPI_ISL_919666, EPI_ISL_919667, EPI_ISL_919668, EPI_ISL_919669, EPI_ISL_919670, EPI_ISL_919671, EPI_ISL_919672, EPI_ISL_919673, EPI_ISL_919674, EPI_ISL_919675, EPI_ISL_919676, EPI_ISL_919677, EPI_ISL_919678, EPI_ISL_919679, EPI_ISL_919680, EPI_ISL_919681, EPI_ISL_919682, EPI_ISL_919683, EPI_ISL_919684, EPI_ISL_919685, EPI_ISL_919686, EPI_ISL_919687, EPI_ISL_919688, EPI_ISL_919689, EPI_ISL_919690, EPI_ISL_919691, EPI_ISL_919692, EPI_ISL_919693, EPI_ISL_919694, EPI_ISL_919695, EPI_ISL_919696, EPI_ISL_919697, EPI_ISL_919698, EPI_ISL_919699, EPI_ISL_919700, EPI_ISL_919701, EPI_ISL_919702, EPI_ISL_919703, EPI_ISL_919704, EPI_ISL_919705, EPI_ISL_919706, EPI_ISL_919707, EPI_ISL_919708, EPI_ISL_919709, EPI_ISL_919710, EPI_ISL_919711, EPI_ISL_919712, EPI_ISL_919713, EPI_ISL_919714, EPI_ISL_919715, EPI_ISL_919716, EPI_ISL_919717, EPI_ISL_919718, EPI_ISL_919719, EPI_ISL_919720, EPI_ISL_919721, EPI_ISL_919722, EPI_ISL_919723, EPI_ISL_919724, EPI_ISL_919725, EPI_ISL_919726, EPI_ISL_919727, EPI_ISL_919728, EPI_ISL_919729, EPI_ISL_919730, EPI_ISL_919731, EPI_ISL_919732, EPI_ISL_919733, EPI_ISL_919734, EPI_ISL_919735, EPI_ISL_919736, EPI_ISL_919737, EPI_ISL_919738, EPI_ISL_919739, EPI_ISL_919740, EPI_ISL_919741, EPI_ISL_919742, EPI_ISL_919743, EPI_ISL_919744, EPI_ISL_919745, EPI_ISL_919746, EPI_ISL_919747, EPI_ISL_919748, EPI_ISL_919749, EPI_ISL_919750, EPI_ISL_919751, EPI_ISL_919752, EPI_ISL_919753, EPI_ISL_919754, EPI_ISL_919755, EPI_ISL_919756, EPI_ISL_919757, EPI_ISL_919758, EPI_ISL_919759, EPI_ISL_919760, EPI_ISL_919761, EPI_ISL_919762, EPI_ISL_919763, EPI_ISL_919764, EPI_ISL_919765, EPI_ISL_919766, EPI_ISL_919767, EPI_ISL_919768, EPI_ISL_919769, EPI_ISL_919770, EPI_ISL_919771, EPI_ISL_919772, EPI_ISL_919773, EPI_ISL_919774, EPI_ISL_919775, EPI_ISL_919776, EPI_ISL_919777, EPI_ISL_919778, EPI_ISL_919779, EPI_ISL_919780, EPI_ISL_919781, EPI_ISL_919782, EPI_ISL_919783, EPI_ISL_919784, EPI_ISL_919785, EPI_ISL_919786, EPI_ISL_919787, EPI_ISL_919788, EPI_ISL_919789, EPI_ISL_919790, EPI_ISL_919791, EPI_ISL_919792, EPI_ISL_919793, EPI_ISL_919794, EPI_ISL_919795, EPI_ISL_919796, EPI_ISL_919797, EPI_ISL_919798, EPI_ISL_919799, EPI_ISL_919800, EPI_ISL_919801, EPI_ISL_919802, EPI_ISL_919803, EPI_ISL_919804, EPI_ISL_919805, EPI_ISL_919806, EPI_ISL_919807, EPI_ISL_919808, EPI_ISL_919809, EPI_ISL_919810, EPI_ISL_919811, EPI_ISL_919812, EPI_ISL_919813, EPI_ISL_919814, EPI_ISL_919815, EPI_ISL_919816, EPI_ISL_919817, EPI_ISL_919818, EPI_ISL_919819, EPI_ISL_919820, EPI_ISL_919821, EPI_ISL_919822, EPI_ISL_919823, EPI_ISL_919824, EPI_ISL_919825, EPI_ISL_919826, EPI_ISL_919827, EPI_ISL_919828, EPI_ISL_919829, EPI_ISL_919830, EPI_ISL_919831, EPI_ISL_919832, EPI_ISL_919833, EPI_ISL_919834, EPI_ISL_919835, EPI_ISL_919836, EPI_ISL_919837, EPI_ISL_919838, EPI_ISL_919839, EPI_ISL_919840, EPI_ISL_919841, EPI_ISL_919842, EPI_ISL_919843, EPI_ISL_919844, EPI_ISL_919845, EPI_ISL_919846, EPI_ISL_919847, EPI_ISL_919848, EPI_ISL_919849, EPI_ISL_919850, EPI_ISL_919851, EPI_ISL_919852, EPI_ISL_919853, EPI_ISL_919854, EPI_ISL_919855, EPI_ISL_919856, EPI_ISL_919857, EPI_ISL_919858, EPI_ISL_919859, EPI_ISL_919860, EPI_ISL_919861, EPI_ISL_919862, EPI_ISL_919863, EPI_ISL_919864, EPI_ISL_919865, EPI_ISL_919866, EPI_ISL_919867, EPI_ISL_919868, EPI_ISL_919869, EPI_ISL_919870, EPI_ISL_919871, EPI_ISL_919872, EPI_ISL_919873, EPI_ISL_919874, EPI_ISL_919875, EPI_ISL_919876, EPI_ISL_919877, EPI_ISL_919878, EPI_ISL_919879, EPI_ISL_919880, EPI_ISL_919881, EPI_ISL_919882, EPI_ISL_919883, EPI_ISL_919884, EPI_ISL_919885, EPI_ISL_919886, EPI_ISL_919887, EPI_ISL_919888, EPI_ISL_919889, EPI_ISL_919890, EPI_ISL_919891, EPI_ISL_919892, EPI_ISL_919893, EPI_ISL_919894, EPI_ISL_919895, EPI_ISL_919896, EPI_ISL_919897, EPI_ISL_919898, EPI_ISL_919899, EPI_ISL_919900, EPI_ISL_919901, EPI_ISL_919902, EPI_ISL_919903, EPI_ISL_919904, EPI_ISL_919905, EPI_ISL_919906, EPI_ISL_919907, EPI_ISL_919908, EPI_ISL_919909, EPI_ISL_919910, EPI_ISL_919911, EPI_ISL_919912, EPI_ISL_919913, EPI_ISL_919914, EPI_ISL_919915, EPI_ISL_919916, EPI_ISL_919917, EPI_ISL_919918, EPI_ISL_919919, EPI_ISL_919920, EPI_ISL_919921, EPI_ISL_919922, EPI_ISL_919923, EPI_ISL_919924, EPI_ISL_919925, EPI_ISL_919926, EPI_ISL_919927, EPI_ISL_919928, EPI_ISL_919929, EPI_ISL_919930, EPI_ISL_919931, EPI_ISL_919932, EPI_ISL_919933, EPI_ISL_919934, EPI_ISL_919935, EPI_ISL_919936, EPI_ISL_919937, EPI_ISL_919938, EPI_ISL_919939, EPI_ISL_919940, EPI_ISL_919941, EPI_ISL_919942, EPI_ISL_919943, EPI_ISL_919944, EPI_ISL_919945, EPI_ISL_919946, EPI_ISL_919947, EPI_ISL_919948, EPI_ISL_919949, EPI_ISL_919950, EPI_ISL_919951, EPI_ISL_919952, EPI_ISL_919953, EPI_ISL_919954, EPI_ISL_919955, EPI_ISL_919956, EPI_ISL_919957, EPI_ISL_919958, EPI_ISL_919959, EPI_ISL_919960, EPI_ISL_919961, EPI_ISL_919962, EPI_ISL_919963, EPI_ISL_919964, EPI_ISL_919965, EPI_ISL_919966, EPI_ISL_919967, EPI_ISL_919968, EPI_ISL_919969, EPI_ISL_919970, EPI_ISL_919971, EPI_ISL_919972, EPI_ISL_919973, EPI_ISL_919974, EPI_ISL_919975, EPI_ISL_919976, EPI_ISL_919977, EPI_ISL_919978, EPI_ISL_919979, EPI_ISL_919980, EPI_ISL_919981, EPI_ISL_919982, EPI_ISL_919983, EPI_ISL_919984, EPI_ISL_919985, EPI_ISL_919986, EPI_ISL_919987, EPI_ISL_919988, EPI_ISL_919989, EPI_ISL_919990, EPI_ISL_919991, EPI_ISL_919992, EPI_ISL_919993, EPI_ISL_919994, EPI_ISL_919995, EPI_ISL_919996, EPI_ISL_919997, EPI_ISL_919998, EPI_ISL_919999 | see above | University College London, Great Ormond Street Hospital for Children NHS Foundation Trust, Imperial College Healthcare NHS Trust                                                                | COVID-19 Genomics UK (COG-UK) Consortium                                   | Sergi Castellano, Rachel Williams, Mark Kristiansen, Paola Resende Silva, Sunando Roy, Tony Brooks, Helena Tutill, Paola Niola, Patricia Dyal, Charlotte Williams, Leysa Forrest, Yasmin Panchbhaya, Jacqueline Findlay, Samuel Weeks, Julianne Brown, Kathryn Harris, Paul Randell, James Price, Alison Holmes, Judith Breuer                                                                                                          |
| EPI_ISL_920174, EPI_ISL_920175, EPI_ISL_920177, EPI_ISL_920180, EPI_ISL_920181, EPI_ISL_920182, EPI_ISL_920183, EPI_ISL_920184, EPI_ISL_920186, EPI_ISL_920190, EPI_ISL_920194, EPI_ISL_920195, EPI_ISL_920196, EPI_ISL_920197, EPI_ISL_920198, EPI_ISL_920199, EPI_ISL_920200, EPI_ISL_920201, EPI_ISL_920202, EPI_ISL_920203, EPI_ISL_920205, EPI_ISL_920206, EPI_ISL_920207, EPI_ISL_920208, EPI_ISL_920210, EPI_ISL_920211, EPI_ISL_920212, EPI_ISL_920214, EPI_ISL_920215, EPI_ISL_920217, EPI_ISL_920218, EPI_ISL_920219, EPI_ISL_920220, EPI_ISL_920221, EPI_ISL_920222, EPI_ISL_920224, EPI_ISL_920225, EPI_ISL_920226, EPI_ISL_920227, EPI_ISL_920228, EPI_ISL_920229, EPI_ISL_920230, EPI_ISL_920231, EPI_ISL_920232, EPI_ISL_920233, EPI_ISL_920234, EPI_ISL_920235, EPI_ISL_920236, EPI_ISL_920237, EPI_ISL_920238, EPI_ISL_920239, EPI_ISL_920240, EPI_ISL_920241, EPI_ISL_920242, EPI_ISL_920243, EPI_ISL_920244, EPI_ISL_920245, EPI_ISL_920246, EPI_ISL_920247, EPI_ISL_920248, EPI_ISL_920249, EPI_ISL_920250, EPI_ISL_920251, EPI_ISL_920252, EPI_ISL_920253, EPI_ISL_920254, EPI_ISL_920255, EPI_ISL_920256, EPI_ISL_920257, EPI_ISL_920258, EPI_ISL_920259, EPI_ISL_920260, EPI_ISL_920261, EPI_ISL_920262, EPI_ISL_920263, EPI_ISL_920264, EPI_ISL_920265, EPI_ISL_920266, EPI_ISL_920267, EPI_ISL_920268, EPI_ISL_920269, EPI_ISL_920270, EPI_ISL_920271, EPI_ISL_920272, EPI_ISL_920273, EPI_ISL_920274, EPI_ISL_920275, EPI_ISL_920276, EPI_ISL_920277, EPI_ISL_920278, EPI_ISL_920279, EPI_ISL_920280, EPI_ISL_920281, EPI_ISL_920282, EPI_ISL_920283, EPI_ISL_920284, EPI_ISL_920285, EPI_ISL_920286, EPI_ISL_920287, EPI_ISL_920288, EPI_ISL_920289, EPI_ISL_920290, EPI_ISL_920291, EPI_ISL_920292, EPI_ISL_920293, EPI_ISL_920294, EPI_ISL_920295, EPI_ISL_920296, EPI_ISL_920297, EPI_ISL_920298, EPI_ISL_920299, EPI_ISL_920300, EPI_ISL_920301, EPI_ISL_920302, EPI_ISL_920303, EPI_ISL_920304, EPI_ISL_920305, EPI_ISL_920306, EPI_ISL_920307, EPI_ISL_920308, EPI_ISL_920309, EPI_ISL_920310, EPI_ISL_920311, EPI_ISL_920312, EPI_ISL_920313, EPI_ISL_920314, EPI_ISL_920315, EPI_ISL_920316, EPI_ISL_920317, EPI_ISL_920318, EPI_ISL_920319, EPI_ISL_920320, EPI_ISL_920321, EPI_ISL_920322, EPI_ISL_920323, EPI_ISL_920324, EPI_ISL_920325, EPI_ISL_920326, EPI_ISL_920327, EPI_ISL_920328, EPI_ISL_920329, EPI_ISL_920330, EPI_ISL_920331, EPI_ISL_920332, EPI_ISL_920333, EPI_ISL_920334, EPI_ISL_920335, EPI_ISL_920336, EPI_ISL_920337, EPI_ISL_920338, EPI_ISL_920339, EPI_ISL_920340, EPI_ISL_920341, EPI_ISL_920342, EPI_ISL_920343, EPI_ISL_920344, EPI_ISL_920345, EPI_ISL_920346, EPI_ISL_920347, EPI_ISL_920348, EPI_ISL_920349, EPI_ISL_920350, EPI_ISL_920351, EPI_ISL_920352, EPI_ISL_920353, EPI_ISL_920354, EPI_ISL_920355, EPI_ISL_920356, EPI_ISL_920357, EPI_ISL_920358, EPI_ISL_920359, EPI_ISL_920360, EPI_ISL_920361, EPI_ISL_920362, EPI_ISL_920363, EPI_ISL_920364, EPI_ISL_920365, EPI_ISL_920366, EPI_ISL_920367, EPI_ISL_920368, EPI_ISL_920369, EPI_ISL_920370, EPI_ISL_920371, EPI_ISL_920372, EPI_ISL_920373, EPI_ISL_920374, EPI_ISL_920375, EPI_ISL_920376, EPI_ISL_920377, EPI_ISL_920378, EPI_ISL_920379, EPI_ISL_920380, EPI_ISL_920381, EPI_ISL_920382, EPI_ISL_920383, EPI_ISL_920384, EPI_ISL_920385, EPI_ISL_920386, EPI_ISL_920387, EPI_ISL_920388, EPI_ISL_920389, EPI_ISL_920390, EPI_ISL_920391, EPI_ISL_920392, EPI_ISL_920393, EPI_ISL_920394, EPI_ISL_920395, EPI_ISL_920396, EPI_ISL_920397, EPI_ISL_920398, EPI_ISL_920399, EPI_ISL_920400, EPI_ISL_920401, EPI_ISL_920402, EPI_ISL_920403, EPI_ISL_920404, EPI_ISL_920405, EPI_ISL_920406, EPI_ISL_920407, EPI_ISL_920408, EPI_ISL_920409, EPI_ISL_920410, EPI_ISL_920411, EPI_ISL_920412, EPI_ISL_920413, EPI_ISL_920414, EPI_ISL_920415, EPI_ISL_920416, EPI_ISL_920417, EPI_ISL_920418, EPI_ISL_920419, EPI_ISL_920420, EPI_ISL_920421, EPI_ISL_920422, EPI_ISL_920423, EPI_ISL_920424, EPI_ISL_920425, EPI_ISL_920426, EPI_ISL_920427, EPI_ISL_920428, EPI_ISL_920429, EPI_ISL_920430, EPI_ISL_920431, EPI_ISL_920432, EPI_ISL_920433, EPI_ISL_920434, EPI_ISL_920435, EPI_ISL_920436, EPI_ISL_920437, EPI_ISL_920438, EPI_ISL_920439, EPI_ISL_920440, EPI_ISL_920441, EPI_ISL_920442, EPI_ISL_920443, EPI_ISL_920444, EPI_ISL_920445, EPI_ISL_920446, EPI_ISL_920447, EPI_ISL_920448, EPI_ISL_920449, EPI_ISL_920450, EPI_ISL_920451, EPI_ISL_920452, EPI_ISL_920453, EPI_ISL_920454, EPI_ISL_920455, EPI_ISL_920456, EPI_ISL_920457, E                                                                                                                                                                                                                                                                                                                                                                                                                                                                                                                                                                                                                                                                                                                                                                                                                                                                                                                                                                                                                                                                                                                                                                                                                                                                                                                                                                                                                                                                                                                                                                                                                                                                                                                                                                                                                                                                                                                                                                                                                                                                                                                                                                                                                                                                                                                                                                                                                                                                                                                                                                                                                                                                                                                                                                                                                                                                                                                                                                                                                                                                                                                                                                                                                                                                                                                                                                                                                                                                                                                                                                                                                                                                                                                                                                                                                                                                                                                                                                                                                                                                                                                                                                                              |           |                                                                                                                                                                                                 |                                                                            |                                                                                                                                                                                                                                                                                                                                                                                                                                         |

[illegible]

|                                                                                                                                                                                                                                                                                                                                                                                                                                                                                                                                                                                                                                                                                                                                                                                                                                                                                                                                                                                                                                                                                                                                                |                                                                                                                                                                                                 |                                                                                                                                                                                                                     |                                                                                                                                                                                                                                                                                                                                                                                                     |                                                                                                                                                                                                                                                                                                                                  |
|------------------------------------------------------------------------------------------------------------------------------------------------------------------------------------------------------------------------------------------------------------------------------------------------------------------------------------------------------------------------------------------------------------------------------------------------------------------------------------------------------------------------------------------------------------------------------------------------------------------------------------------------------------------------------------------------------------------------------------------------------------------------------------------------------------------------------------------------------------------------------------------------------------------------------------------------------------------------------------------------------------------------------------------------------------------------------------------------------------------------------------------------|-------------------------------------------------------------------------------------------------------------------------------------------------------------------------------------------------|---------------------------------------------------------------------------------------------------------------------------------------------------------------------------------------------------------------------|-----------------------------------------------------------------------------------------------------------------------------------------------------------------------------------------------------------------------------------------------------------------------------------------------------------------------------------------------------------------------------------------------------|----------------------------------------------------------------------------------------------------------------------------------------------------------------------------------------------------------------------------------------------------------------------------------------------------------------------------------|
| EPI_ISL_949640, EPI_ISL_949643, EPI_ISL_949644                                                                                                                                                                                                                                                                                                                                                                                                                                                                                                                                                                                                                                                                                                                                                                                                                                                                                                                                                                                                                                                                                                 | Virology Department, Royal Infirmary of Edinburgh, NHS Lothian / School of Biological Sciences, University of Edinburgh / Institute of Genetics and Molecular Medicine, University of Edinburgh | COVID-19 Genomics UK (COG-UK) Consortium                                                                                                                                                                            | McHugh M, Dewar R, Rooke S, Gallagher M, Balcaza C, O'Toole Á, Scher E, Hill V, McCrone JT, Colquhoun R, Yu X, Jackson B, Rambaut A, Williams TC, Templeton K                                                                                                                                                                                                                                       |                                                                                                                                                                                                                                                                                                                                  |
| EPI_ISL_949749, EPI_ISL_949777, EPI_ISL_949778, EPI_ISL_949780, EPI_ISL_949783                                                                                                                                                                                                                                                                                                                                                                                                                                                                                                                                                                                                                                                                                                                                                                                                                                                                                                                                                                                                                                                                 | Barts Health NHS Trust                                                                                                                                                                          | COVID-19 Genomics UK (COG-UK) Consortium                                                                                                                                                                            | CUTINO-MOGUEL, Maria-Teresa; HARRINGTON, David; OWOYEMI, Dola; KULASEGARAN-SHYLINI, Raghavendran; BROAD, Claire; KELE, Beatrix                                                                                                                                                                                                                                                                      |                                                                                                                                                                                                                                                                                                                                  |
| EPI_ISL_950159, EPI_ISL_950211, EPI_ISL_950212, EPI_ISL_950213, EPI_ISL_950214, EPI_ISL_950215, EPI_ISL_950216, EPI_ISL_950217, EPI_ISL_950218, EPI_ISL_950219, EPI_ISL_950220, EPI_ISL_950221, EPI_ISL_950222, EPI_ISL_950223, EPI_ISL_950224, EPI_ISL_950225, EPI_ISL_950226, EPI_ISL_950227, EPI_ISL_950228, EPI_ISL_950229, EPI_ISL_950230, EPI_ISL_950231                                                                                                                                                                                                                                                                                                                                                                                                                                                                                                                                                                                                                                                                                                                                                                                 | see above                                                                                                                                                                                       | University College London, Great Ormond Street Hospital for Children NHS Foundation Trust, Imperial College Healthcare NHS Trust                                                                                    | COVID-19 Genomics UK (COG-UK) Consortium                                                                                                                                                                                                                                                                                                                                                            | Sergi Castellano, Rachel Williams, Mark Kristiansen, Paola Resende Silva, Sunando Roy, Tony Brooks, Helena Tutill, Paola Niola, Patricia Dyal, Charlotte Williams, Leysa Forrest, Yasmin Panchbhaya, Jacqueline Findlay, Samuel Weeks, Julianne Brown, Kathryn Harris, Paul Randell, James Price, Alison Holmes, Judith Breuer   |
| EPI_ISL_950294, EPI_ISL_950298, EPI_ISL_950304, EPI_ISL_950305, EPI_ISL_950306, EPI_ISL_950307, EPI_ISL_950308, EPI_ISL_950309, EPI_ISL_950310, EPI_ISL_950311, EPI_ISL_950312, EPI_ISL_950317, EPI_ISL_950321, EPI_ISL_950323, EPI_ISL_950324, EPI_ISL_950325, EPI_ISL_950326, EPI_ISL_950327, EPI_ISL_950328, EPI_ISL_950329, EPI_ISL_950330, EPI_ISL_950331, EPI_ISL_950332, EPI_ISL_950333, EPI_ISL_950334, EPI_ISL_950335, EPI_ISL_950336                                                                                                                                                                                                                                                                                                                                                                                                                                                                                                                                                                                                                                                                                                 | see above                                                                                                                                                                                       | Northumbria University / South Tees Hospitals NHS Foundation Trust / North Cumbria Integrated Care NHS Foundation Trust / North Tees and Hartlepool NHS Foundation Trust / Newcastle Hospitals NHS Foundation Trust | COVID-19 Genomics UK (COG-UK) Consortium                                                                                                                                                                                                                                                                                                                                                            | Darren L Smith,Andrew Nelson,Matthew Bashton,Greg R Young,Joshua Loh,John Allan,Mohammad A Tariq,Giles S Holt,Gary Black,Wen C Yew,Lynn Dover,Paul Baker,Steve Liggett,Sarah Essex,Jane Greenaway,Debra Padgett,Clive Graham,Garren Scott,Edward Barton,Emma Swindells,Brendan Payne,Jennifer Collins,Yusri Taha,Gary Eltringham |
| EPI_ISL_950714                                                                                                                                                                                                                                                                                                                                                                                                                                                                                                                                                                                                                                                                                                                                                                                                                                                                                                                                                                                                                                                                                                                                 | Lincolnshire Hospitals and DeepSeq Nottingham                                                                                                                                                   | COVID-19 Genomics UK (COG-UK) Consortium                                                                                                                                                                            | Nichola Duckworth, Tim Sloan, Sarah Walsh, Jonathan Ball, Patrick McClure, Joeseph Chappell, Nadine Holmes, Matthew Carlisle, Christopher Moore, Fei Sang, Johnny Debebe, Victoria Wright, Matthew Loose                                                                                                                                                                                            |                                                                                                                                                                                                                                                                                                                                  |
| EPI_ISL_951305, EPI_ISL_951311, EPI_ISL_951313, EPI_ISL_951318, EPI_ISL_951361, EPI_ISL_951374, EPI_ISL_951375, EPI_ISL_951378, EPI_ISL_951379, EPI_ISL_951380, EPI_ISL_951383, EPI_ISL_951387, EPI_ISL_951388, EPI_ISL_951416, EPI_ISL_951419, EPI_ISL_951420, EPI_ISL_951421, EPI_ISL_951423, EPI_ISL_951424, EPI_ISL_951425, EPI_ISL_951428, EPI_ISL_951435, EPI_ISL_951436, EPI_ISL_951437, EPI_ISL_951438, EPI_ISL_951442, EPI_ISL_951444, EPI_ISL_951445, EPI_ISL_951446, EPI_ISL_951447, EPI_ISL_951449, EPI_ISL_951450, EPI_ISL_951451, EPI_ISL_951452, EPI_ISL_951453, EPI_ISL_951456, EPI_ISL_951457, EPI_ISL_951458, EPI_ISL_951459                                                                                                                                                                                                                                                                                                                                                                                                                                                                                                 | see above                                                                                                                                                                                       | Oxford Viromics, NDM, University of Oxford; Oxford University Hospitals; Basingstoke and North Hampshire Hospital                                                                                                   | COVID-19 Genomics UK (COG-UK) Consortium                                                                                                                                                                                                                                                                                                                                                            | Tanya Golubchik, David Bonsall, George Macintyre, Amy Trebes, Mariateresa de Cesare, Catrin Moore, Alex Mobbs, Anita Justice, Robert Shaw, Monique Andersson, Timothy Peto, Emma Wise, Nathan Moore, Jessica Lynch, Nick Cortes, Matilde Mori, Stephen Kidd, David Buck, John Todd, Christophe Fraser                            |
| EPI_ISL_951629, EPI_ISL_951816                                                                                                                                                                                                                                                                                                                                                                                                                                                                                                                                                                                                                                                                                                                                                                                                                                                                                                                                                                                                                                                                                                                 | Originating lab: Wales Specialist Virology Centre Sequencing lab: Pathogen Genomics Unit                                                                                                        | Public Health Wales Microbiology Cardiff Wales Specialist Virology Centre                                                                                                                                           | Catherine Moore, Johnathan Evans, Laura Gifford, Malorie Perry, Simon Cottrell, Angela Marchbank, Alec Birchley, Alexander Adams, Amy Gaskin, Bree Gatica-Wilcox, Jason Coombes, Joel Southgate, Lauren Gilbert, Lee Graham, Nicole Pacchiarini, Sara Kumziene-Summerhayes, Sarah Taylor, Sophie Jones, Sara Rey, Matthew Bull, Joanne Watkins, Sally Corden, Tom Connor                            |                                                                                                                                                                                                                                                                                                                                  |
| EPI_ISL_952377, EPI_ISL_952378, EPI_ISL_952379, EPI_ISL_952382, EPI_ISL_952383, EPI_ISL_952385, EPI_ISL_952389, EPI_ISL_952392, EPI_ISL_952394, EPI_ISL_952397, EPI_ISL_952398, EPI_ISL_952409, EPI_ISL_952411, EPI_ISL_952414, EPI_ISL_952418, EPI_ISL_952422, EPI_ISL_952424, EPI_ISL_952427, EPI_ISL_952429, EPI_ISL_952433, EPI_ISL_952471, EPI_ISL_952472, EPI_ISL_952473, EPI_ISL_952474, EPI_ISL_952475, EPI_ISL_952476, EPI_ISL_952526, EPI_ISL_952569, EPI_ISL_952570, EPI_ISL_952571, EPI_ISL_952572, EPI_ISL_952573, EPI_ISL_952574, EPI_ISL_952575, EPI_ISL_952576, EPI_ISL_952578, EPI_ISL_952580, EPI_ISL_952581, EPI_ISL_952582, EPI_ISL_952583, EPI_ISL_952584, EPI_ISL_952585, EPI_ISL_952586, EPI_ISL_952587, EPI_ISL_952588, EPI_ISL_952589, EPI_ISL_952590, EPI_ISL_952591, EPI_ISL_952592, EPI_ISL_952594, EPI_ISL_952595, EPI_ISL_952597, EPI_ISL_952598, EPI_ISL_952599, EPI_ISL_952600, EPI_ISL_952601, EPI_ISL_952602, EPI_ISL_952624, EPI_ISL_952778, EPI_ISL_952779, EPI_ISL_952780, EPI_ISL_952789, EPI_ISL_952793, EPI_ISL_952794, EPI_ISL_952795, EPI_ISL_952798, EPI_ISL_952799, EPI_ISL_952804, EPI_ISL_952854 | see above                                                                                                                                                                                       | Centre for Enzyme Innovation, University of Portsmouth / Translational Research Laboratory, Portsmouth Hospitals NHS Trust                                                                                          | COVID-19 Genomics UK (COG-UK) Consortium                                                                                                                                                                                                                                                                                                                                                            | Angela Beckett,Salman Goudarzi,Christopher Fearn,Kate Cook,Katie Loveson,Sharon Glaysher,Scott Elliott,Samuel Robson                                                                                                                                                                                                             |
| EPI_ISL_952896, EPI_ISL_952897, EPI_ISL_952899, EPI_ISL_952900, EPI_ISL_952901, EPI_ISL_952902, EPI_ISL_952903, EPI_ISL_952904, EPI_ISL_952905, EPI_ISL_952906, EPI_ISL_952907, EPI_ISL_952908, EPI_ISL_952909, EPI_ISL_952910, EPI_ISL_952912, EPI_ISL_952913, EPI_ISL_952932                                                                                                                                                                                                                                                                                                                                                                                                                                                                                                                                                                                                                                                                                                                                                                                                                                                                 | see above                                                                                                                                                                                       | Department of Pathology, University of Cambridge                                                                                                                                                                    | COVID-19 Genomics UK (COG-UK) Consortium                                                                                                                                                                                                                                                                                                                                                            | Aminu S. Jahun, Yasmin Chaudhry, Iliana Georgana, Myra Hosmillo, Rhys Izu, Martin D. Curran, Surendra Parmar, Ian Goodfellow                                                                                                                                                                                                     |
| EPI_ISL_953024, EPI_ISL_953025, EPI_ISL_953026, EPI_ISL_953027, EPI_ISL_953028, EPI_ISL_953029, EPI_ISL_953030, EPI_ISL_953031, EPI_ISL_953032, EPI_ISL_953033, EPI_ISL_953034, EPI_ISL_953035, EPI_ISL_953036, EPI_ISL_953037, EPI_ISL_953038, EPI_ISL_953039, EPI_ISL_953040, EPI_ISL_953041, EPI_ISL_953042, EPI_ISL_953043, EPI_ISL_953044, EPI_ISL_953045, EPI_ISL_953046, EPI_ISL_953047, EPI_ISL_953048, EPI_ISL_953049, EPI_ISL_953050, EPI_ISL_953051, EPI_ISL_953052, EPI_ISL_953053, EPI_ISL_953054, EPI_ISL_953055, EPI_ISL_953056, EPI_ISL_953057, EPI_ISL_953058, EPI_ISL_953059, EPI_ISL_953060, EPI_ISL_953061, EPI_ISL_953062, EPI_ISL_953063, EPI_ISL_953064, EPI_ISL_953065, EPI_ISL_953066, EPI_ISL_953067, EPI_ISL_953068, EPI_ISL_953069, EPI_ISL_953070, EPI_ISL_953071, EPI_ISL_953072, EPI_ISL_953074, EPI_ISL_953077, EPI_ISL_953078, EPI_ISL_953079, EPI_ISL_953080, EPI_ISL_953081, EPI_ISL_953082, EPI_ISL_953085, EPI_ISL_953086, EPI_ISL_953087, EPI_ISL_953088, EPI_ISL_953090, EPI_ISL_953091, EPI_ISL_953092, EPI_ISL_953093, EPI_ISL_953094, EPI_ISL_953095, EPI_ISL_953100                                 | see above                                                                                                                                                                                       | Bioinformatics and Biostatistics Lab, Advanced Sequencing Facility                                                                                                                                                  | COVID-19 Genomics UK (COG-UK) Consortium                                                                                                                                                                                                                                                                                                                                                            | Aengus Stewart,Jerome Nicod,Chelsea Sawyer,Laura Cubitt,Harshil Patel,Margaret Crawford                                                                                                                                                                                                                                          |
| EPI_ISL_963321                                                                                                                                                                                                                                                                                                                                                                                                                                                                                                                                                                                                                                                                                                                                                                                                                                                                                                                                                                                                                                                                                                                                 | Lighthouse Lab in Alderley Park                                                                                                                                                                 | Wellcome Sanger Institute for the COVID-19 Genomics UK (COG-UK) Consortium                                                                                                                                          | Jacquelyn Wynn, Mairead Hyland, The Lighthouse Lab in Alderley Park and Alex Alderton, Roberto Amato, Sonia Goncalves, Ewan Harrison, David K. Jackson, Ian Johnston, Dominic Kwiatkowski, Cordelia Langford, John Sillitoe on behalf of the Wellcome Sanger Institute COVID-19 Surveillance Team                                                                                                   |                                                                                                                                                                                                                                                                                                                                  |
| EPI_ISL_987283, EPI_ISL_987287, EPI_ISL_987290, EPI_ISL_987291, EPI_ISL_987299                                                                                                                                                                                                                                                                                                                                                                                                                                                                                                                                                                                                                                                                                                                                                                                                                                                                                                                                                                                                                                                                 | Lighthouse Lab in Cambridge                                                                                                                                                                     | Wellcome Sanger Institute for the COVID-19 Genomics UK (COG-UK) Consortium                                                                                                                                          | Rob Howes, The Lighthouse Lab in Cambridge and Alex Alderton, Roberto Amato, Sonia Goncalves, Ewan Harrison, David K. Jackson, Ian Johnston, Dominic Kwiatkowski, Cordelia Langford, John Sillitoe on behalf of the Wellcome Sanger Institute COVID-19 Surveillance Team ( <a href="http://www.sanger.ac.uk/covid-team">http://www.sanger.ac.uk/covid-team</a> )                                    |                                                                                                                                                                                                                                                                                                                                  |
| EPI_ISL_987300                                                                                                                                                                                                                                                                                                                                                                                                                                                                                                                                                                                                                                                                                                                                                                                                                                                                                                                                                                                                                                                                                                                                 | Lighthouse Lab in Glasgow                                                                                                                                                                       | Wellcome Sanger Institute for the COVID-19 Genomics UK (COG-UK) Consortium                                                                                                                                          | Harper VanSteenhouse, Yumi Kasai, David Gray, Carol Clugston, Anna Dominiczak and Alex Alderton, Roberto Amato, Sonia Goncalves, Ewan Harrison, David K. Jackson, Ian Johnston, Dominic Kwiatkowski, Cordelia Langford, John Sillitoe on behalf of the Wellcome Sanger Institute COVID-19 Surveillance Team ( <a href="http://www.sanger.ac.uk/covid-team">http://www.sanger.ac.uk/covid-team</a> ) |                                                                                                                                                                                                                                                                                                                                  |
| EPI_ISL_987303, EPI_ISL_987310                                                                                                                                                                                                                                                                                                                                                                                                                                                                                                                                                                                                                                                                                                                                                                                                                                                                                                                                                                                                                                                                                                                 | Lighthouse Lab in Cambridge                                                                                                                                                                     | Wellcome Sanger Institute for the COVID-19 Genomics UK (COG-UK) Consortium                                                                                                                                          | Rob Howes, The Lighthouse Lab in Cambridge and Alex Alderton, Roberto Amato, Sonia Goncalves, Ewan Harrison, David K. Jackson, Ian Johnston, Dominic Kwiatkowski, Cordelia Langford, John Sillitoe on behalf of the Wellcome Sanger Institute COVID-19 Surveillance Team ( <a href="http://www.sanger.ac.uk/covid-team">http://www.sanger.ac.uk/covid-team</a> )                                    |                                                                                                                                                                                                                                                                                                                                  |
| EPI_ISL_987311                                                                                                                                                                                                                                                                                                                                                                                                                                                                                                                                                                                                                                                                                                                                                                                                                                                                                                                                                                                                                                                                                                                                 | Lighthouse Lab in Glasgow                                                                                                                                                                       | Wellcome Sanger Institute for the COVID-19 Genomics UK (COG-UK) Consortium                                                                                                                                          | Harper VanSteenhouse, Yumi Kasai, David Gray, Carol Clugston, Anna Dominiczak and Alex Alderton, Roberto Amato, Sonia Goncalves, Ewan Harrison, David K. Jackson, Ian Johnston, Dominic Kwiatkowski, Cordelia Langford, John Sillitoe on behalf of the Wellcome Sanger Institute COVID-19 Surveillance Team ( <a href="http://www.sanger.ac.uk/covid-team">http://www.sanger.ac.uk/covid-team</a> ) |                                                                                                                                                                                                                                                                                                                                  |
| EPI_ISL_987312                                                                                                                                                                                                                                                                                                                                                                                                                                                                                                                                                                                                                                                                                                                                                                                                                                                                                                                                                                                                                                                                                                                                 | Lighthouse Lab in Cambridge                                                                                                                                                                     | Wellcome Sanger Institute for the COVID-19 Genomics UK (COG-UK) Consortium                                                                                                                                          | Rob Howes, The Lighthouse Lab in Cambridge and Alex Alderton, Roberto Amato, Sonia Goncalves, Ewan Harrison, David K. Jackson, Ian Johnston, Dominic Kwiatkowski, Cordelia Langford, John Sillitoe on behalf of the Wellcome Sanger Institute COVID-19 Surveillance Team ( <a href="http://www.sanger.ac.uk/covid-team">http://www.sanger.ac.uk/covid-team</a> )                                    |                                                                                                                                                                                                                                                                                                                                  |
| EPI_ISL_987317                                                                                                                                                                                                                                                                                                                                                                                                                                                                                                                                                                                                                                                                                                                                                                                                                                                                                                                                                                                                                                                                                                                                 | Lighthouse Lab in Glasgow                                                                                                                                                                       | Wellcome Sanger Institute for the COVID-19 Genomics UK (COG-UK) Consortium                                                                                                                                          | Harper VanSteenhouse, Yumi Kasai, David Gray, Carol Clugston, Anna Dominiczak and Alex Alderton, Roberto Amato, Sonia Goncalves, Ewan Harrison, David K. Jackson, Ian Johnston, Dominic Kwiatkowski, Cordelia Langford, John Sillitoe on behalf of the Wellcome Sanger Institute COVID-19 Surveillance Team ( <a href="http://www.sanger.ac.uk/covid-team">http://www.sanger.ac.uk/covid-team</a> ) |                                                                                                                                                                                                                                                                                                                                  |
| EPI_ISL_987319, EPI_ISL_987322, EPI_ISL_987326, EPI_ISL_987328                                                                                                                                                                                                                                                                                                                                                                                                                                                                                                                                                                                                                                                                                                                                                                                                                                                                                                                                                                                                                                                                                 | Lighthouse Lab in Cambridge                                                                                                                                                                     | Wellcome Sanger Institute for the COVID-19 Genomics UK (COG-UK) Consortium                                                                                                                                          | Rob Howes, The Lighthouse Lab in Cambridge and Alex Alderton, Roberto Amato, Sonia Goncalves, Ewan Harrison, David K. Jackson, Ian Johnston, Dominic Kwiatkowski, Cordelia Langford, John Sillitoe on behalf of the Wellcome Sanger Institute COVID-19 Surveillance Team ( <a href="http://www.sanger.ac.uk/covid-team">http://www.sanger.ac.uk/covid-team</a> )                                    |                                                                                                                                                                                                                                                                                                                                  |
| EPI_ISL_987330, EPI_ISL_987331                                                                                                                                                                                                                                                                                                                                                                                                                                                                                                                                                                                                                                                                                                                                                                                                                                                                                                                                                                                                                                                                                                                 | Lighthouse Lab in Milton Keynes                                                                                                                                                                 | Wellcome Sanger Institute for the COVID-19 Genomics UK (COG-UK) Consortium                                                                                                                                          | The Lighthouse Lab in Milton Keynes and Alex Alderton, Roberto Amato, Sonia Goncalves, Ewan Harrison, David K. Jackson, Ian Johnston, Dominic Kwiatkowski, Cordelia Langford, John Sillitoe on behalf of the Wellcome Sanger Institute COVID-19 Surveillance Team ( <a href="http://www.sanger.ac.uk/covid-team">http://www.sanger.ac.uk/covid-team</a> )                                           |                                                                                                                                                                                                                                                                                                                                  |
| EPI_ISL_987332                                                                                                                                                                                                                                                                                                                                                                                                                                                                                                                                                                                                                                                                                                                                                                                                                                                                                                                                                                                                                                                                                                                                 | Lighthouse Lab in Cambridge                                                                                                                                                                     | Wellcome Sanger Institute for the COVID-19 Genomics UK (COG-UK) Consortium                                                                                                                                          | Rob Howes, The Lighthouse Lab in Cambridge and Alex Alderton, Roberto Amato, Sonia Goncalves, Ewan Harrison, David K. Jackson, Ian Johnston, Dominic Kwiatkowski, Cordelia Langford, John Sillitoe on behalf of the Wellcome Sanger Institute COVID-19 Surveillance Team ( <a href="http://www.sanger.ac.uk/covid-team">http://www.sanger.ac.uk/covid-team</a> )                                    |                                                                                                                                                                                                                                                                                                                                  |
| EPI_ISL_987334                                                                                                                                                                                                                                                                                                                                                                                                                                                                                                                                                                                                                                                                                                                                                                                                                                                                                                                                                                                                                                                                                                                                 | Lighthouse Lab in Milton Keynes                                                                                                                                                                 | Wellcome Sanger Institute for the COVID-19 Genomics UK (COG-UK) Consortium                                                                                                                                          | The Lighthouse Lab in Milton Keynes and Alex Alderton, Roberto Amato, Sonia Goncalves, Ewan Harrison, David K. Jackson, Ian Johnston, Dominic Kwiatkowski, Cordelia Langford, John Sillitoe on behalf of the Wellcome Sanger Institute COVID-19 Surveillance Team                                                                                                                                   |                                                                                                                                                                                                                                                                                                                                  |

[illegible]

[illegible]



[illegible]

[illegible]

[illegible]

[illegible]

[illegible]

[illegible]

|                                                                                                                                                                                                                                                                                                                                                                                                                                                                                                                                                                                                                                                                                                                                                                                                                                                |                                                                                                                                                                                                                     |                                                                            |                                                                                                                                                                                                                                                                                                                                                                                                                                                                                                                                                                                                                                                                                         |
|------------------------------------------------------------------------------------------------------------------------------------------------------------------------------------------------------------------------------------------------------------------------------------------------------------------------------------------------------------------------------------------------------------------------------------------------------------------------------------------------------------------------------------------------------------------------------------------------------------------------------------------------------------------------------------------------------------------------------------------------------------------------------------------------------------------------------------------------|---------------------------------------------------------------------------------------------------------------------------------------------------------------------------------------------------------------------|----------------------------------------------------------------------------|-----------------------------------------------------------------------------------------------------------------------------------------------------------------------------------------------------------------------------------------------------------------------------------------------------------------------------------------------------------------------------------------------------------------------------------------------------------------------------------------------------------------------------------------------------------------------------------------------------------------------------------------------------------------------------------------|
| EPI_ISL_994052, EPI_ISL_994053                                                                                                                                                                                                                                                                                                                                                                                                                                                                                                                                                                                                                                                                                                                                                                                                                 | Lighthouse Lab in Cambridge                                                                                                                                                                                         | Wellcome Sanger Institute for the COVID-19 Genomics UK (COG-UK) Consortium | Rob Howes, The Lighthouse Lab in Cambridge and Alex Alderton, Roberto Amato, Sonia Goncalves, Ewan Harrison, David K. Jackson, Ian Johnston, Dominic Kwiatkowski, Cordelia Langford, John Sillitoe on behalf of the Wellcome Sanger Institute COVID-19 Surveillance Team ( <a href="http://www.sanger.ac.uk/covid-team">http://www.sanger.ac.uk/covid-team</a> )                                                                                                                                                                                                                                                                                                                        |
| EPI_ISL_994054                                                                                                                                                                                                                                                                                                                                                                                                                                                                                                                                                                                                                                                                                                                                                                                                                                 | Lighthouse Lab in Milton Keynes                                                                                                                                                                                     | Wellcome Sanger Institute for the COVID-19 Genomics UK (COG-UK) Consortium | The Lighthouse Lab in Milton Keynes and Alex Alderton, Roberto Amato, Sonia Goncalves, Ewan Harrison, David K. Jackson, Ian Johnston, Dominic Kwiatkowski, Cordelia Langford, John Sillitoe on behalf of the Wellcome Sanger Institute COVID-19 Surveillance Team ( <a href="http://www.sanger.ac.uk/covid-team">http://www.sanger.ac.uk/covid-team</a> )                                                                                                                                                                                                                                                                                                                               |
| EPI_ISL_994055                                                                                                                                                                                                                                                                                                                                                                                                                                                                                                                                                                                                                                                                                                                                                                                                                                 | Lighthouse Lab in Cambridge                                                                                                                                                                                         | Wellcome Sanger Institute for the COVID-19 Genomics UK (COG-UK) Consortium | Rob Howes, The Lighthouse Lab in Cambridge and Alex Alderton, Roberto Amato, Sonia Goncalves, Ewan Harrison, David K. Jackson, Ian Johnston, Dominic Kwiatkowski, Cordelia Langford, John Sillitoe on behalf of the Wellcome Sanger Institute COVID-19 Surveillance Team ( <a href="http://www.sanger.ac.uk/covid-team">http://www.sanger.ac.uk/covid-team</a> )                                                                                                                                                                                                                                                                                                                        |
| EPI_ISL_994057                                                                                                                                                                                                                                                                                                                                                                                                                                                                                                                                                                                                                                                                                                                                                                                                                                 | Lighthouse Lab in Milton Keynes                                                                                                                                                                                     | Wellcome Sanger Institute for the COVID-19 Genomics UK (COG-UK) Consortium | The Lighthouse Lab in Milton Keynes and Alex Alderton, Roberto Amato, Sonia Goncalves, Ewan Harrison, David K. Jackson, Ian Johnston, Dominic Kwiatkowski, Cordelia Langford, John Sillitoe on behalf of the Wellcome Sanger Institute COVID-19 Surveillance Team ( <a href="http://www.sanger.ac.uk/covid-team">http://www.sanger.ac.uk/covid-team</a> )                                                                                                                                                                                                                                                                                                                               |
| EPI_ISL_994058, EPI_ISL_994060, EPI_ISL_994061                                                                                                                                                                                                                                                                                                                                                                                                                                                                                                                                                                                                                                                                                                                                                                                                 | Lighthouse Lab in Cambridge                                                                                                                                                                                         | Wellcome Sanger Institute for the COVID-19 Genomics UK (COG-UK) Consortium | Rob Howes, The Lighthouse Lab in Cambridge and Alex Alderton, Roberto Amato, Sonia Goncalves, Ewan Harrison, David K. Jackson, Ian Johnston, Dominic Kwiatkowski, Cordelia Langford, John Sillitoe on behalf of the Wellcome Sanger Institute COVID-19 Surveillance Team ( <a href="http://www.sanger.ac.uk/covid-team">http://www.sanger.ac.uk/covid-team</a> )                                                                                                                                                                                                                                                                                                                        |
| EPI_ISL_994062, EPI_ISL_994063                                                                                                                                                                                                                                                                                                                                                                                                                                                                                                                                                                                                                                                                                                                                                                                                                 | Lighthouse Lab in Milton Keynes                                                                                                                                                                                     | Wellcome Sanger Institute for the COVID-19 Genomics UK (COG-UK) Consortium | The Lighthouse Lab in Milton Keynes and Alex Alderton, Roberto Amato, Sonia Goncalves, Ewan Harrison, David K. Jackson, Ian Johnston, Dominic Kwiatkowski, Cordelia Langford, John Sillitoe on behalf of the Wellcome Sanger Institute COVID-19 Surveillance Team ( <a href="http://www.sanger.ac.uk/covid-team">http://www.sanger.ac.uk/covid-team</a> )                                                                                                                                                                                                                                                                                                                               |
| EPI_ISL_994064                                                                                                                                                                                                                                                                                                                                                                                                                                                                                                                                                                                                                                                                                                                                                                                                                                 | Lighthouse Lab in Cambridge                                                                                                                                                                                         | Wellcome Sanger Institute for the COVID-19 Genomics UK (COG-UK) Consortium | Rob Howes, The Lighthouse Lab in Cambridge and Alex Alderton, Roberto Amato, Sonia Goncalves, Ewan Harrison, David K. Jackson, Ian Johnston, Dominic Kwiatkowski, Cordelia Langford, John Sillitoe on behalf of the Wellcome Sanger Institute COVID-19 Surveillance Team ( <a href="http://www.sanger.ac.uk/covid-team">http://www.sanger.ac.uk/covid-team</a> )                                                                                                                                                                                                                                                                                                                        |
| EPI_ISL_994065                                                                                                                                                                                                                                                                                                                                                                                                                                                                                                                                                                                                                                                                                                                                                                                                                                 | Lighthouse Lab in Milton Keynes                                                                                                                                                                                     | Wellcome Sanger Institute for the COVID-19 Genomics UK (COG-UK) Consortium | The Lighthouse Lab in Milton Keynes and Alex Alderton, Roberto Amato, Sonia Goncalves, Ewan Harrison, David K. Jackson, Ian Johnston, Dominic Kwiatkowski, Cordelia Langford, John Sillitoe on behalf of the Wellcome Sanger Institute COVID-19 Surveillance Team ( <a href="http://www.sanger.ac.uk/covid-team">http://www.sanger.ac.uk/covid-team</a> )                                                                                                                                                                                                                                                                                                                               |
| EPI_ISL_994066                                                                                                                                                                                                                                                                                                                                                                                                                                                                                                                                                                                                                                                                                                                                                                                                                                 | Lighthouse Lab in Cambridge                                                                                                                                                                                         | Wellcome Sanger Institute for the COVID-19 Genomics UK (COG-UK) Consortium | Rob Howes, The Lighthouse Lab in Cambridge and Alex Alderton, Roberto Amato, Sonia Goncalves, Ewan Harrison, David K. Jackson, Ian Johnston, Dominic Kwiatkowski, Cordelia Langford, John Sillitoe on behalf of the Wellcome Sanger Institute COVID-19 Surveillance Team ( <a href="http://www.sanger.ac.uk/covid-team">http://www.sanger.ac.uk/covid-team</a> )                                                                                                                                                                                                                                                                                                                        |
| EPI_ISL_994288, EPI_ISL_994297, EPI_ISL_994328, EPI_ISL_994338, EPI_ISL_994339, EPI_ISL_994343, EPI_ISL_994357, EPI_ISL_994360, EPI_ISL_994361, EPI_ISL_994386, EPI_ISL_994389, EPI_ISL_994391, EPI_ISL_994402, EPI_ISL_994407, EPI_ISL_994411, EPI_ISL_994413, EPI_ISL_994416, EPI_ISL_994419                                                                                                                                                                                                                                                                                                                                                                                                                                                                                                                                                 |                                                                                                                                                                                                                     |                                                                            |                                                                                                                                                                                                                                                                                                                                                                                                                                                                                                                                                                                                                                                                                         |
| see above                                                                                                                                                                                                                                                                                                                                                                                                                                                                                                                                                                                                                                                                                                                                                                                                                                      | Lighthouse Lab in Alderley Park                                                                                                                                                                                     | Wellcome Sanger Institute for the COVID-19 Genomics UK (COG-UK) Consortium | Jacquelyn Wynn, Mairead Hyland, The Lighthouse Lab in Alderley Park and Alex Alderton, Roberto Amato, Sonia Goncalves, Ewan Harrison, David K. Jackson, Ian Johnston, Dominic Kwiatkowski, Cordelia Langford, John Sillitoe on behalf of the Wellcome Sanger Institute COVID-19 Surveillance Team ( <a href="http://www.sanger.ac.uk/covid-team">http://www.sanger.ac.uk/covid-team</a> )                                                                                                                                                                                                                                                                                               |
| EPI_ISL_994424, EPI_ISL_994446, EPI_ISL_994448, EPI_ISL_994456, EPI_ISL_994464, EPI_ISL_994467, EPI_ISL_994468, EPI_ISL_994473, EPI_ISL_994478, EPI_ISL_994481, EPI_ISL_994482, EPI_ISL_994484, EPI_ISL_994488, EPI_ISL_994496, EPI_ISL_994507, EPI_ISL_994513, EPI_ISL_994514, EPI_ISL_994515, EPI_ISL_994529, EPI_ISL_994538, EPI_ISL_994543, EPI_ISL_994590, EPI_ISL_994615, EPI_ISL_994619, EPI_ISL_994622, EPI_ISL_994623, EPI_ISL_994624, EPI_ISL_994626, EPI_ISL_994629, EPI_ISL_994630, EPI_ISL_994633, EPI_ISL_994634, EPI_ISL_994635, EPI_ISL_994636, EPI_ISL_994637, EPI_ISL_994639, EPI_ISL_994641, EPI_ISL_994643, EPI_ISL_994646                                                                                                                                                                                                 |                                                                                                                                                                                                                     |                                                                            |                                                                                                                                                                                                                                                                                                                                                                                                                                                                                                                                                                                                                                                                                         |
| see above                                                                                                                                                                                                                                                                                                                                                                                                                                                                                                                                                                                                                                                                                                                                                                                                                                      | Lighthouse Lab in Alderley Park                                                                                                                                                                                     | Wellcome Sanger Institute for the COVID-19 Genomics UK (COG-UK) Consortium | Jacquelyn Wynn, Mairead Hyland, The Lighthouse Lab in Alderley Park and Alex Alderton, Roberto Amato, Sonia Goncalves, Ewan Harrison, David K. Jackson, Ian Johnston, Dominic Kwiatkowski, Cordelia Langford, John Sillitoe on behalf of the Wellcome Sanger Institute COVID-19 Surveillance Team                                                                                                                                                                                                                                                                                                                                                                                       |
| EPI_ISL_996066, EPI_ISL_996067, EPI_ISL_996069, EPI_ISL_996070, EPI_ISL_996071, EPI_ISL_996073, EPI_ISL_996075, EPI_ISL_996079, EPI_ISL_996080, EPI_ISL_996081                                                                                                                                                                                                                                                                                                                                                                                                                                                                                                                                                                                                                                                                                 |                                                                                                                                                                                                                     |                                                                            |                                                                                                                                                                                                                                                                                                                                                                                                                                                                                                                                                                                                                                                                                         |
| see above                                                                                                                                                                                                                                                                                                                                                                                                                                                                                                                                                                                                                                                                                                                                                                                                                                      | Department of Pathology, University of Cambridge                                                                                                                                                                    | COVID-19 Genomics UK (COG-UK) Consortium                                   | Aminu S. Jahun, Yasmin Chaudhry, Iliana Georgana, Myra Hosmillo, Rhys Izuagbe, William L. Hamilton, Martin D. Curran, Surendra Parmar, Ian Goodfellow                                                                                                                                                                                                                                                                                                                                                                                                                                                                                                                                   |
| EPI_ISL_996422, EPI_ISL_996423, EPI_ISL_996431, EPI_ISL_996432, EPI_ISL_996449, EPI_ISL_996453, EPI_ISL_996455, EPI_ISL_996459                                                                                                                                                                                                                                                                                                                                                                                                                                                                                                                                                                                                                                                                                                                 | University of Birmingham                                                                                                                                                                                            | COVID-19 Genomics UK (COG-UK) Consortium                                   | Institute of Microbiology, University of Birmingham: Claire McMurray, Joanne Stockton, Samuel Nicholls, Radoslaw Poplawski, Will Rowe, Josh Quick, Nicholas Loman. University of Birmingham Testing Laboratory: Celina M Whalley, Andrew Bosworth, Charlotte Poxon, Kasun Wanigasooriya, Oliver Pickles, Mike Kidd, Alex Richter, Andrew D Beggs PHE Heartlands Lab: Husam Osman, Andrew Bosworth. Queen Elizabeth Hospital: Anna Casey                                                                                                                                                                                                                                                 |
| EPI_ISL_996579, EPI_ISL_996594                                                                                                                                                                                                                                                                                                                                                                                                                                                                                                                                                                                                                                                                                                                                                                                                                 | University of Exeter                                                                                                                                                                                                | COVID-19 Genomics UK (COG-UK) Consortium                                   | Ben Temperton, Aaron Jeffries, Michelle Michelsen, Joanna Warwick-Dugdale, Audrey Farbos, Robyn Manley, Stephen Michell, Jane Masoli                                                                                                                                                                                                                                                                                                                                                                                                                                                                                                                                                    |
| EPI_ISL_997075, EPI_ISL_997076, EPI_ISL_997159, EPI_ISL_997160, EPI_ISL_997163                                                                                                                                                                                                                                                                                                                                                                                                                                                                                                                                                                                                                                                                                                                                                                 | Virology Department, Royal Infirmary of Edinburgh, NHS Lothian / School of Biological Sciences, University of Edinburgh                                                                                             | COVID-19 Genomics UK (COG-UK) Consortium                                   | McHugh M, Dewar R, Cotton S, Rooke S, O'Toole Á, Scher E, Hill V, McCrone JT, Colquhoun R, Yu X, Jackson B, Rambaut A, Templeton K                                                                                                                                                                                                                                                                                                                                                                                                                                                                                                                                                      |
| EPI_ISL_997328, EPI_ISL_997329, EPI_ISL_997330, EPI_ISL_997331, EPI_ISL_997332, EPI_ISL_997337                                                                                                                                                                                                                                                                                                                                                                                                                                                                                                                                                                                                                                                                                                                                                 | University of Exeter                                                                                                                                                                                                | COVID-19 Genomics UK (COG-UK) Consortium                                   | Ben Temperton, Aaron Jeffries, Michelle Michelsen, Joanna Warwick-Dugdale, Audrey Farbos, Robyn Manley, Stephen Michell, Jane Masoli                                                                                                                                                                                                                                                                                                                                                                                                                                                                                                                                                    |
| EPI_ISL_997378, EPI_ISL_997384, EPI_ISL_997385, EPI_ISL_997386, EPI_ISL_997387, EPI_ISL_997388, EPI_ISL_997389, EPI_ISL_997390, EPI_ISL_997391, EPI_ISL_997392                                                                                                                                                                                                                                                                                                                                                                                                                                                                                                                                                                                                                                                                                 | Liverpool Clinical Laboratories                                                                                                                                                                                     | COVID-19 Genomics UK (COG-UK) Consortium                                   | Sam Haldenby, Anita Lucaci, Steve Paterson, Julian Hiscox, Alistair Darby, M Almsaud, A Alrezaihi, Muhannad Alruwaili, Stuart D Armstrong, Jones Benjamin, Eleanor G Bentley, Anu Chawla, Jordan J Clark, Angela Cowell, Richard Eccles, Isabel Garcia-Dorival, Matthew Gemmell, Alessandro Gerada, PKF Gilmore, Richard Gregory, Ximeng Han, Catherine Hartley, Margaret Hughes, Miren Iturriza-Gomara, James Johnson, L Luu, Jenifer Manson, Charlotte Nelson, Elaine O'Toole, Cassie Olateju, Rebekah Penrice-Randal, Lucille Rainbow, N.P Randle, Trevor Ian Robinson, Parul Sharma, Ghada T Shawli, James P Stewart, Neil Swainston, Ecaterina Vamos, Joanne Watts, Mark Whitehead |
| EPI_ISL_997616, EPI_ISL_997617, EPI_ISL_997618, EPI_ISL_997619, EPI_ISL_997620, EPI_ISL_997621, EPI_ISL_997622, EPI_ISL_997623, EPI_ISL_997624, EPI_ISL_997630, EPI_ISL_997631, EPI_ISL_997632, EPI_ISL_997633, EPI_ISL_997634, EPI_ISL_997635, EPI_ISL_997636, EPI_ISL_997637, EPI_ISL_997638, EPI_ISL_997639, EPI_ISL_997640, EPI_ISL_997641, EPI_ISL_997643, EPI_ISL_997644                                                                                                                                                                                                                                                                                                                                                                                                                                                                 |                                                                                                                                                                                                                     |                                                                            |                                                                                                                                                                                                                                                                                                                                                                                                                                                                                                                                                                                                                                                                                         |
| see above                                                                                                                                                                                                                                                                                                                                                                                                                                                                                                                                                                                                                                                                                                                                                                                                                                      | Barts Health NHS Trust                                                                                                                                                                                              | COVID-19 Genomics UK (COG-UK) Consortium                                   | CUTINO-MOGUEL, Maria-Teresa; HARRINGTON, David; OWOYEMI, Dola; KULASEGARAN-SHYLINI, Raghavendran; BROAD, Claire; KELE, Beatrix                                                                                                                                                                                                                                                                                                                                                                                                                                                                                                                                                          |
| EPI_ISL_997677, EPI_ISL_997840, EPI_ISL_997841, EPI_ISL_997842, EPI_ISL_997995, EPI_ISL_997996, EPI_ISL_998002, EPI_ISL_998003, EPI_ISL_998004, EPI_ISL_998005                                                                                                                                                                                                                                                                                                                                                                                                                                                                                                                                                                                                                                                                                 | University College London, Great Ormond Street Hospital for Children NHS Foundation Trust, Imperial College Healthcare NHS Trust                                                                                    | COVID-19 Genomics UK (COG-UK) Consortium                                   | Sergi Castellano, Rachel Williams, Mark Kristiansen, Paola Resende Silva, Sunando Roy, Tony Brooks, Helena Tuttili, Paola Niola, Patricia Dyal, Charlotte Williams, Leysa Forrest, Yasmin Panchbhaya, Jacqueline Findlay, Samuel Weeks, Julianne Brown, Kathryn Harris, Paul Randell, James Price, Alison Holmes, Judith Breuer                                                                                                                                                                                                                                                                                                                                                         |
| EPI_ISL_998150, EPI_ISL_998151, EPI_ISL_998152, EPI_ISL_998153, EPI_ISL_998155, EPI_ISL_998156, EPI_ISL_998157, EPI_ISL_998160, EPI_ISL_998161, EPI_ISL_998162, EPI_ISL_998171, EPI_ISL_998172, EPI_ISL_998174, EPI_ISL_998189, EPI_ISL_998190, EPI_ISL_998191, EPI_ISL_998192, EPI_ISL_998193, EPI_ISL_998194, EPI_ISL_998195, EPI_ISL_998196, EPI_ISL_998198, EPI_ISL_998200, EPI_ISL_998218, EPI_ISL_998219, EPI_ISL_998220, EPI_ISL_998221, EPI_ISL_998238, EPI_ISL_998240, EPI_ISL_998241, EPI_ISL_998243, EPI_ISL_998244, EPI_ISL_998245, EPI_ISL_998246, EPI_ISL_998247                                                                                                                                                                                                                                                                 |                                                                                                                                                                                                                     |                                                                            |                                                                                                                                                                                                                                                                                                                                                                                                                                                                                                                                                                                                                                                                                         |
| see above                                                                                                                                                                                                                                                                                                                                                                                                                                                                                                                                                                                                                                                                                                                                                                                                                                      | Regional Virus Laboratory, Belfast Health and Social Care Trust                                                                                                                                                     | COVID-19 Genomics UK (COG-UK) Consortium                                   | Conall McCaughey, James McKenna, Tanya Curran, Susan Feeney, Alison Watt, Ciara Cox, Mairead Connor, Zoltan Molnar, David Simpson, Derek Fairley                                                                                                                                                                                                                                                                                                                                                                                                                                                                                                                                        |
| EPI_ISL_998313, EPI_ISL_998314, EPI_ISL_998316, EPI_ISL_998317, EPI_ISL_998318, EPI_ISL_998319, EPI_ISL_998320, EPI_ISL_998321, EPI_ISL_998323, EPI_ISL_998324, EPI_ISL_998325, EPI_ISL_998326, EPI_ISL_998327, EPI_ISL_998328, EPI_ISL_998329, EPI_ISL_998330, EPI_ISL_998331, EPI_ISL_998332, EPI_ISL_998333, EPI_ISL_998334, EPI_ISL_998335, EPI_ISL_998336, EPI_ISL_998337, EPI_ISL_998338, EPI_ISL_998339, EPI_ISL_998340, EPI_ISL_998341, EPI_ISL_998346, EPI_ISL_998351, EPI_ISL_998352, EPI_ISL_998353, EPI_ISL_998354, EPI_ISL_998355, EPI_ISL_998356, EPI_ISL_998357, EPI_ISL_998358, EPI_ISL_998359, EPI_ISL_998360, EPI_ISL_998361, EPI_ISL_998362, EPI_ISL_998363, EPI_ISL_998365, EPI_ISL_998366, EPI_ISL_998367, EPI_ISL_998373, EPI_ISL_998374, EPI_ISL_998375, EPI_ISL_998376, EPI_ISL_998377, EPI_ISL_998378, EPI_ISL_998379 |                                                                                                                                                                                                                     |                                                                            |                                                                                                                                                                                                                                                                                                                                                                                                                                                                                                                                                                                                                                                                                         |
| see above                                                                                                                                                                                                                                                                                                                                                                                                                                                                                                                                                                                                                                                                                                                                                                                                                                      | Northumbria University / South Tees Hospitals NHS Foundation Trust / North Cumbria Integrated Care NHS Foundation Trust / North Tees and Hartlepool NHS Foundation Trust / Newcastle Hospitals NHS Foundation Trust | COVID-19 Genomics UK (COG-UK) Consortium                                   | Darren L Smith, Andrew Nelson, Matthew Bashton, Greg R Young, Joshua Loh, John Allan, Mohammad A Tariq, Giles S Holt, Gary Black, Wen C Yew, Lynn Dover, Paul Baker, Steve Liggett, Sarah Essex, Jane Greenaway, Debra Padgett, Clive Graham, Garren Scott, Edward Barton, Emma Swindells, Brendan Payne, Jennifer Collins, Yusra Taha, Gary Eltringham                                                                                                                                                                                                                                                                                                                                 |

|                                                                                                                                                                                                                                                                                                                                                                                                                                                                                                                                                                                                                                                                                                                                                                                                                                                                                                                                                                                                                                                                                                                                                                                                                                                                                                                                                                                                                                                |                                                                                                                   |                                          |                                                                                                                                                                                                                                                                                                       |
|------------------------------------------------------------------------------------------------------------------------------------------------------------------------------------------------------------------------------------------------------------------------------------------------------------------------------------------------------------------------------------------------------------------------------------------------------------------------------------------------------------------------------------------------------------------------------------------------------------------------------------------------------------------------------------------------------------------------------------------------------------------------------------------------------------------------------------------------------------------------------------------------------------------------------------------------------------------------------------------------------------------------------------------------------------------------------------------------------------------------------------------------------------------------------------------------------------------------------------------------------------------------------------------------------------------------------------------------------------------------------------------------------------------------------------------------|-------------------------------------------------------------------------------------------------------------------|------------------------------------------|-------------------------------------------------------------------------------------------------------------------------------------------------------------------------------------------------------------------------------------------------------------------------------------------------------|
| EPI_ISL_998945, EPI_ISL_998946, EPI_ISL_998947, EPI_ISL_998948, EPI_ISL_998949, EPI_ISL_998950, EPI_ISL_998951, EPI_ISL_998952, EPI_ISL_998953, EPI_ISL_998954, EPI_ISL_998955, EPI_ISL_998956                                                                                                                                                                                                                                                                                                                                                                                                                                                                                                                                                                                                                                                                                                                                                                                                                                                                                                                                                                                                                                                                                                                                                                                                                                                 |                                                                                                                   |                                          |                                                                                                                                                                                                                                                                                                       |
| see above                                                                                                                                                                                                                                                                                                                                                                                                                                                                                                                                                                                                                                                                                                                                                                                                                                                                                                                                                                                                                                                                                                                                                                                                                                                                                                                                                                                                                                      | Lincolnshire Hospitals and DeepSeq Nottingham                                                                     | COVID-19 Genomics UK (COG-UK) Consortium | Nichola Duckworth, Tim Sloan, Sarah Walsh, Jonathan Ball, Patrick McClure, Joeseeph Chappell, Nadine Holmes, Matthew Carlisle, Christopher Moore, Fei Sang, Johnny Debebe, Victoria Wright, Matthew Loose                                                                                             |
| EPI_ISL_999068, EPI_ISL_999069, EPI_ISL_999071, EPI_ISL_999078, EPI_ISL_999081, EPI_ISL_999083, EPI_ISL_999084, EPI_ISL_999085, EPI_ISL_999086, EPI_ISL_999087, EPI_ISL_999089, EPI_ISL_999092, EPI_ISL_999093, EPI_ISL_999095, EPI_ISL_999099, EPI_ISL_999100, EPI_ISL_999101, EPI_ISL_999102, EPI_ISL_999103, EPI_ISL_999104, EPI_ISL_999105, EPI_ISL_999106, EPI_ISL_999108, EPI_ISL_999109, EPI_ISL_999111, EPI_ISL_999112, EPI_ISL_999113, EPI_ISL_999114, EPI_ISL_999116, EPI_ISL_999119, EPI_ISL_999120, EPI_ISL_999121, EPI_ISL_999122, EPI_ISL_999123, EPI_ISL_999124, EPI_ISL_999125, EPI_ISL_999126, EPI_ISL_999127, EPI_ISL_999132, EPI_ISL_999134, EPI_ISL_999136, EPI_ISL_999137, EPI_ISL_999138, EPI_ISL_999139, EPI_ISL_999141, EPI_ISL_999142, EPI_ISL_999143, EPI_ISL_999144, EPI_ISL_999145, EPI_ISL_999146, EPI_ISL_999148, EPI_ISL_999150, EPI_ISL_999151, EPI_ISL_999152, EPI_ISL_999153, EPI_ISL_999154, EPI_ISL_999156, EPI_ISL_999161, EPI_ISL_999169, EPI_ISL_999204, EPI_ISL_999205, EPI_ISL_999207, EPI_ISL_999208, EPI_ISL_999210, EPI_ISL_999223, EPI_ISL_999374, EPI_ISL_999379, EPI_ISL_999381, EPI_ISL_999382, EPI_ISL_999385, EPI_ISL_999394, EPI_ISL_999395, EPI_ISL_999397, EPI_ISL_999401, EPI_ISL_999402, EPI_ISL_999404, EPI_ISL_999405, EPI_ISL_999406, EPI_ISL_999407, EPI_ISL_999427, EPI_ISL_999436, EPI_ISL_999462, EPI_ISL_999463, EPI_ISL_999479, EPI_ISL_999481, EPI_ISL_999506, EPI_ISL_999507 |                                                                                                                   |                                          |                                                                                                                                                                                                                                                                                                       |
| see above                                                                                                                                                                                                                                                                                                                                                                                                                                                                                                                                                                                                                                                                                                                                                                                                                                                                                                                                                                                                                                                                                                                                                                                                                                                                                                                                                                                                                                      | Oxford Viromics, NDM, University of Oxford; Oxford University Hospitals; Basingstoke and North Hampshire Hospital | COVID-19 Genomics UK (COG-UK) Consortium | Tanya Golubchik, David Bonsall, George Macintyre, Amy Trebes, Mariateresa de Cesare, Catrin Moore, Alex Mobbs, Anita Justice, Robert Shaw, Monique Andersson, Timothy Peto, Emma Wise, Nathan Moore, Jessica Lynch, Nick Cortes, Matilde Mori, Stephen Kidd, David Buck, John Todd, Christophe Fraser |
