# Supplementary material for: Inferring the Association between the Risk of COVID-19 Case Fatality and N501Y Substitution in SARS-CoV-2
Source: MDPI journal article supplement (doi:10.3390/v13040638), 2021-04-08
Supplement: s1 [file s1]

We gratefully acknowledge the following Authors from the Originating laboratories responsible for obtaining the specimens, as well as the Submitting laboratories where the genome data were generated and shared via GISAID, on which this research is based.

All Submitters of data may be contacted directly via [www.gisaid.org](http://www.gisaid.org)

Authors are sorted alphabetically.

| Accession ID                                                                                                                                                                                                                                                                                                                                                                                                                                                                                                                                                                                                                                                                                                                                                                                                                                                                                                                                                                                                                                                                                                                                                                                                                                                                                                                                                                                                                                                                                                                                                                                                                                                                                                                                                                                                                                                                                                                                                                                                                                                                                                                                                                                                                                                                                                                                                                                                                                                                                                                                                                                                                                                                                                                                                                                                                                                                                                                                                                                                                                                                                                                                                                                                                                                                                                                                                                                                                                                                                                                                                                                                                                                                                                                                                                                                                                                                                                                                                                                                                                                                                                                                                                                                                                                                                                                                                                                                                                                                                                                                                                                                                                                                                                                                                                                                                                                                                                                                                                                                                                                                                                                                                                                                                                                                                                                                                                                                                                                                                                                                                                                                                                                                                                                                        | Originating Laboratory                                                                                                                                                           | Submitting Laboratory                                                      | Authors                                                                                                                                                                                                                                                                                                                      |
|-----------------------------------------------------------------------------------------------------------------------------------------------------------------------------------------------------------------------------------------------------------------------------------------------------------------------------------------------------------------------------------------------------------------------------------------------------------------------------------------------------------------------------------------------------------------------------------------------------------------------------------------------------------------------------------------------------------------------------------------------------------------------------------------------------------------------------------------------------------------------------------------------------------------------------------------------------------------------------------------------------------------------------------------------------------------------------------------------------------------------------------------------------------------------------------------------------------------------------------------------------------------------------------------------------------------------------------------------------------------------------------------------------------------------------------------------------------------------------------------------------------------------------------------------------------------------------------------------------------------------------------------------------------------------------------------------------------------------------------------------------------------------------------------------------------------------------------------------------------------------------------------------------------------------------------------------------------------------------------------------------------------------------------------------------------------------------------------------------------------------------------------------------------------------------------------------------------------------------------------------------------------------------------------------------------------------------------------------------------------------------------------------------------------------------------------------------------------------------------------------------------------------------------------------------------------------------------------------------------------------------------------------------------------------------------------------------------------------------------------------------------------------------------------------------------------------------------------------------------------------------------------------------------------------------------------------------------------------------------------------------------------------------------------------------------------------------------------------------------------------------------------------------------------------------------------------------------------------------------------------------------------------------------------------------------------------------------------------------------------------------------------------------------------------------------------------------------------------------------------------------------------------------------------------------------------------------------------------------------------------------------------------------------------------------------------------------------------------------------------------------------------------------------------------------------------------------------------------------------------------------------------------------------------------------------------------------------------------------------------------------------------------------------------------------------------------------------------------------------------------------------------------------------------------------------------------------------------------------------------------------------------------------------------------------------------------------------------------------------------------------------------------------------------------------------------------------------------------------------------------------------------------------------------------------------------------------------------------------------------------------------------------------------------------------------------------------------------------------------------------------------------------------------------------------------------------------------------------------------------------------------------------------------------------------------------------------------------------------------------------------------------------------------------------------------------------------------------------------------------------------------------------------------------------------------------------------------------------------------------------------------------------------------------------------------------------------------------------------------------------------------------------------------------------------------------------------------------------------------------------------------------------------------------------------------------------------------------------------------------------------------------------------------------------------------------------------------------------------------------------------|----------------------------------------------------------------------------------------------------------------------------------------------------------------------------------|----------------------------------------------------------------------------|------------------------------------------------------------------------------------------------------------------------------------------------------------------------------------------------------------------------------------------------------------------------------------------------------------------------------|
| EPI_ISL_1000240, EPI_ISL_1000242, EPI_ISL_1000243, EPI_ISL_1000257, EPI_ISL_1000260, EPI_ISL_1000262, EPI_ISL_1000267, EPI_ISL_1000269, EPI_ISL_1000271, EPI_ISL_1000273, EPI_ISL_1000281, EPI_ISL_1000282, EPI_ISL_1000292, EPI_ISL_1000302, EPI_ISL_1000308, EPI_ISL_1000314, EPI_ISL_1000456, EPI_ISL_1000457, EPI_ISL_1000458, EPI_ISL_1000459, EPI_ISL_1000460, EPI_ISL_1000482, EPI_ISL_1000483, EPI_ISL_1000601, EPI_ISL_1000605, EPI_ISL_1000606, EPI_ISL_1000607, EPI_ISL_1000608, EPI_ISL_1000610, EPI_ISL_1000618, EPI_ISL_1000619, EPI_ISL_1000620, EPI_ISL_1000621, EPI_ISL_1000622, EPI_ISL_1000623, EPI_ISL_1000624, EPI_ISL_1000625, EPI_ISL_1000627                                                                                                                                                                                                                                                                                                                                                                                                                                                                                                                                                                                                                                                                                                                                                                                                                                                                                                                                                                                                                                                                                                                                                                                                                                                                                                                                                                                                                                                                                                                                                                                                                                                                                                                                                                                                                                                                                                                                                                                                                                                                                                                                                                                                                                                                                                                                                                                                                                                                                                                                                                                                                                                                                                                                                                                                                                                                                                                                                                                                                                                                                                                                                                                                                                                                                                                                                                                                                                                                                                                                                                                                                                                                                                                                                                                                                                                                                                                                                                                                                                                                                                                                                                                                                                                                                                                                                                                                                                                                                                                                                                                                                                                                                                                                                                                                                                                                                                                                                                                                                                                                                |                                                                                                                                                                                  |                                                                            |                                                                                                                                                                                                                                                                                                                              |
| see above                                                                                                                                                                                                                                                                                                                                                                                                                                                                                                                                                                                                                                                                                                                                                                                                                                                                                                                                                                                                                                                                                                                                                                                                                                                                                                                                                                                                                                                                                                                                                                                                                                                                                                                                                                                                                                                                                                                                                                                                                                                                                                                                                                                                                                                                                                                                                                                                                                                                                                                                                                                                                                                                                                                                                                                                                                                                                                                                                                                                                                                                                                                                                                                                                                                                                                                                                                                                                                                                                                                                                                                                                                                                                                                                                                                                                                                                                                                                                                                                                                                                                                                                                                                                                                                                                                                                                                                                                                                                                                                                                                                                                                                                                                                                                                                                                                                                                                                                                                                                                                                                                                                                                                                                                                                                                                                                                                                                                                                                                                                                                                                                                                                                                                                                           | Centre for Enzyme Innovation, University of Portsmouth / Translational Research Laboratory, Portsmouth Hospitals NHS Trust                                                       | COVID-19 Genomics UK (COG-UK) Consortium                                   | Angela Beckett,Salman Goudarzi,Christopher Fearn,Kate Cook,Katie Loveson,Sharon Glaysher,Scott Elliott,Samuel Robson                                                                                                                                                                                                         |
| EPI_ISL_1000763, EPI_ISL_1000787                                                                                                                                                                                                                                                                                                                                                                                                                                                                                                                                                                                                                                                                                                                                                                                                                                                                                                                                                                                                                                                                                                                                                                                                                                                                                                                                                                                                                                                                                                                                                                                                                                                                                                                                                                                                                                                                                                                                                                                                                                                                                                                                                                                                                                                                                                                                                                                                                                                                                                                                                                                                                                                                                                                                                                                                                                                                                                                                                                                                                                                                                                                                                                                                                                                                                                                                                                                                                                                                                                                                                                                                                                                                                                                                                                                                                                                                                                                                                                                                                                                                                                                                                                                                                                                                                                                                                                                                                                                                                                                                                                                                                                                                                                                                                                                                                                                                                                                                                                                                                                                                                                                                                                                                                                                                                                                                                                                                                                                                                                                                                                                                                                                                                                                    | Virology Department, Sheffield Teaching Hospitals NHS Foundation Trust/Department of Infection, Immunity and Cardiovascular Disease, The Medical School, University of Sheffield | COVID-19 Genomics UK (COG-UK) Consortium                                   | Thushan de Silva, Matthew Parker, Nikki Smith, Adri Agyal, Rebecca Brown, Luke Green, Rachel Tucker, Paul Parsons, Danielle Groves, Katie Johnson, Laura Carrilero, Alex Keeley, Dave Partridge, Matthew Wyles, Benjamin Lindsey, Mehmet Yavuz, Mohammad Raza, Cariad Evans                                                  |
| EPI_ISL_1000806, EPI_ISL_1000808, EPI_ISL_1000816, EPI_ISL_1000819, EPI_ISL_1000822, EPI_ISL_1000826, EPI_ISL_1000832, EPI_ISL_1000833, EPI_ISL_1000834, EPI_ISL_1000835, EPI_ISL_1000836, EPI_ISL_1000837, EPI_ISL_1000845, EPI_ISL_1000964                                                                                                                                                                                                                                                                                                                                                                                                                                                                                                                                                                                                                                                                                                                                                                                                                                                                                                                                                                                                                                                                                                                                                                                                                                                                                                                                                                                                                                                                                                                                                                                                                                                                                                                                                                                                                                                                                                                                                                                                                                                                                                                                                                                                                                                                                                                                                                                                                                                                                                                                                                                                                                                                                                                                                                                                                                                                                                                                                                                                                                                                                                                                                                                                                                                                                                                                                                                                                                                                                                                                                                                                                                                                                                                                                                                                                                                                                                                                                                                                                                                                                                                                                                                                                                                                                                                                                                                                                                                                                                                                                                                                                                                                                                                                                                                                                                                                                                                                                                                                                                                                                                                                                                                                                                                                                                                                                                                                                                                                                                        |                                                                                                                                                                                  |                                                                            |                                                                                                                                                                                                                                                                                                                              |
| see above                                                                                                                                                                                                                                                                                                                                                                                                                                                                                                                                                                                                                                                                                                                                                                                                                                                                                                                                                                                                                                                                                                                                                                                                                                                                                                                                                                                                                                                                                                                                                                                                                                                                                                                                                                                                                                                                                                                                                                                                                                                                                                                                                                                                                                                                                                                                                                                                                                                                                                                                                                                                                                                                                                                                                                                                                                                                                                                                                                                                                                                                                                                                                                                                                                                                                                                                                                                                                                                                                                                                                                                                                                                                                                                                                                                                                                                                                                                                                                                                                                                                                                                                                                                                                                                                                                                                                                                                                                                                                                                                                                                                                                                                                                                                                                                                                                                                                                                                                                                                                                                                                                                                                                                                                                                                                                                                                                                                                                                                                                                                                                                                                                                                                                                                           | Bioinformatics and Biostatistics Lab, Advanced Sequencing Facility                                                                                                               | COVID-19 Genomics UK (COG-UK) Consortium                                   | Aengus Stewart,Jerome Nicod,Chelsea Sawyer,Laura Cubitt,Harshil Patel,Margaret Crawford                                                                                                                                                                                                                                      |
| EPI_ISL_1006341, EPI_ISL_1006344, EPI_ISL_1006345, EPI_ISL_1006348, EPI_ISL_1006354, EPI_ISL_1006357, EPI_ISL_1006358, EPI_ISL_1006365, EPI_ISL_1006366, EPI_ISL_1006367, EPI_ISL_1006373, EPI_ISL_1006374, EPI_ISL_1006378, EPI_ISL_1006385, EPI_ISL_1006387, EPI_ISL_1006390, EPI_ISL_1006391, EPI_ISL_1006395, EPI_ISL_1006399, EPI_ISL_1006409, EPI_ISL_1006412, EPI_ISL_1006422, EPI_ISL_1006423, EPI_ISL_1006426, EPI_ISL_1006428, EPI_ISL_1006435, EPI_ISL_1006438, EPI_ISL_1006439, EPI_ISL_1006445, EPI_ISL_1006453, EPI_ISL_1006456, EPI_ISL_1006457, EPI_ISL_1006458, EPI_ISL_1006467, EPI_ISL_1006471, EPI_ISL_1006474, EPI_ISL_1006475, EPI_ISL_1006476, EPI_ISL_1006477, EPI_ISL_1006479, EPI_ISL_1006482, EPI_ISL_1006488, EPI_ISL_1006489, EPI_ISL_1006490, EPI_ISL_1006501, EPI_ISL_1006511, EPI_ISL_1006516, EPI_ISL_1006521, EPI_ISL_1006529, EPI_ISL_1006530, EPI_ISL_1006533, EPI_ISL_1006535, EPI_ISL_1006538                                                                                                                                                                                                                                                                                                                                                                                                                                                                                                                                                                                                                                                                                                                                                                                                                                                                                                                                                                                                                                                                                                                                                                                                                                                                                                                                                                                                                                                                                                                                                                                                                                                                                                                                                                                                                                                                                                                                                                                                                                                                                                                                                                                                                                                                                                                                                                                                                                                                                                                                                                                                                                                                                                                                                                                                                                                                                                                                                                                                                                                                                                                                                                                                                                                                                                                                                                                                                                                                                                                                                                                                                                                                                                                                                                                                                                                                                                                                                                                                                                                                                                                                                                                                                                                                                                                                                                                                                                                                                                                                                                                                                                                                                                                                                                                                                 |                                                                                                                                                                                  |                                                                            |                                                                                                                                                                                                                                                                                                                              |
| see above                                                                                                                                                                                                                                                                                                                                                                                                                                                                                                                                                                                                                                                                                                                                                                                                                                                                                                                                                                                                                                                                                                                                                                                                                                                                                                                                                                                                                                                                                                                                                                                                                                                                                                                                                                                                                                                                                                                                                                                                                                                                                                                                                                                                                                                                                                                                                                                                                                                                                                                                                                                                                                                                                                                                                                                                                                                                                                                                                                                                                                                                                                                                                                                                                                                                                                                                                                                                                                                                                                                                                                                                                                                                                                                                                                                                                                                                                                                                                                                                                                                                                                                                                                                                                                                                                                                                                                                                                                                                                                                                                                                                                                                                                                                                                                                                                                                                                                                                                                                                                                                                                                                                                                                                                                                                                                                                                                                                                                                                                                                                                                                                                                                                                                                                           | Lighthouse Lab in Milton Keynes                                                                                                                                                  | Wellcome Sanger Institute for the COVID-19 Genomics UK (COG-UK) Consortium | The Lighthouse Lab in Milton Keynes and Alex Alderton, Roberto Amato, Sonia Goncalves, Ewan Harrison, David K. Jackson, Ian Johnston, Dominic Kwiatkowski, Cordelia Langford, John Sillitoe on behalf of the Wellcome Sanger Institute COVID-19 Surveillance Team                                                            |
| EPI_ISL_1007549, EPI_ISL_1007550, EPI_ISL_1007551, EPI_ISL_1007552, EPI_ISL_1007553, EPI_ISL_1007554, EPI_ISL_1007555, EPI_ISL_1007556, EPI_ISL_1007557, EPI_ISL_1007558, EPI_ISL_1007559, EPI_ISL_1007560                                                                                                                                                                                                                                                                                                                                                                                                                                                                                                                                                                                                                                                                                                                                                                                                                                                                                                                                                                                                                                                                                                                                                                                                                                                                                                                                                                                                                                                                                                                                                                                                                                                                                                                                                                                                                                                                                                                                                                                                                                                                                                                                                                                                                                                                                                                                                                                                                                                                                                                                                                                                                                                                                                                                                                                                                                                                                                                                                                                                                                                                                                                                                                                                                                                                                                                                                                                                                                                                                                                                                                                                                                                                                                                                                                                                                                                                                                                                                                                                                                                                                                                                                                                                                                                                                                                                                                                                                                                                                                                                                                                                                                                                                                                                                                                                                                                                                                                                                                                                                                                                                                                                                                                                                                                                                                                                                                                                                                                                                                                                          |                                                                                                                                                                                  |                                                                            |                                                                                                                                                                                                                                                                                                                              |
| see above                                                                                                                                                                                                                                                                                                                                                                                                                                                                                                                                                                                                                                                                                                                                                                                                                                                                                                                                                                                                                                                                                                                                                                                                                                                                                                                                                                                                                                                                                                                                                                                                                                                                                                                                                                                                                                                                                                                                                                                                                                                                                                                                                                                                                                                                                                                                                                                                                                                                                                                                                                                                                                                                                                                                                                                                                                                                                                                                                                                                                                                                                                                                                                                                                                                                                                                                                                                                                                                                                                                                                                                                                                                                                                                                                                                                                                                                                                                                                                                                                                                                                                                                                                                                                                                                                                                                                                                                                                                                                                                                                                                                                                                                                                                                                                                                                                                                                                                                                                                                                                                                                                                                                                                                                                                                                                                                                                                                                                                                                                                                                                                                                                                                                                                                           | Lighthouse Lab in Alderley Park                                                                                                                                                  | Wellcome Sanger Institute for the COVID-19 Genomics UK (COG-UK) Consortium | Jacquelyn Wynn, Mairead Hyland, The Lighthouse Lab in Alderley Park and Alex Alderton, Roberto Amato, Sonia Goncalves, Ewan Harrison, David K. Jackson, Ian Johnston, Dominic Kwiatkowski, Cordelia Langford, John Sillitoe on behalf of the Wellcome Sanger Institute COVID-19 Surveillance Team                            |
| EPI_ISL_1007561, EPI_ISL_1007562                                                                                                                                                                                                                                                                                                                                                                                                                                                                                                                                                                                                                                                                                                                                                                                                                                                                                                                                                                                                                                                                                                                                                                                                                                                                                                                                                                                                                                                                                                                                                                                                                                                                                                                                                                                                                                                                                                                                                                                                                                                                                                                                                                                                                                                                                                                                                                                                                                                                                                                                                                                                                                                                                                                                                                                                                                                                                                                                                                                                                                                                                                                                                                                                                                                                                                                                                                                                                                                                                                                                                                                                                                                                                                                                                                                                                                                                                                                                                                                                                                                                                                                                                                                                                                                                                                                                                                                                                                                                                                                                                                                                                                                                                                                                                                                                                                                                                                                                                                                                                                                                                                                                                                                                                                                                                                                                                                                                                                                                                                                                                                                                                                                                                                                    | Lighthouse Lab in Glasgow                                                                                                                                                        | Wellcome Sanger Institute for the COVID-19 Genomics UK (COG-UK) Consortium | Harper VanSteenhouse, Yumi Kasai, David Gray, Carol Clugston, Anna Dominiczak and Alex Alderton, Roberto Amato, Sonia Goncalves, Ewan Harrison, David K. Jackson, Ian Johnston, Dominic Kwiatkowski, Cordelia Langford, John Sillitoe on behalf of the Wellcome Sanger Institute COVID-19 Surveillance Team                  |
| EPI_ISL_1007563, EPI_ISL_1012713, EPI_ISL_1012714, EPI_ISL_1012715, EPI_ISL_1012716, EPI_ISL_1012717, EPI_ISL_1012718, EPI_ISL_1012719, EPI_ISL_1012720, EPI_ISL_1012721, EPI_ISL_1012722, EPI_ISL_1012723, EPI_ISL_1012724, EPI_ISL_1012725, EPI_ISL_1012726, EPI_ISL_1012727, EPI_ISL_1012728, EPI_ISL_1012729, EPI_ISL_1012730, EPI_ISL_1012731, EPI_ISL_1012732, EPI_ISL_1012733, EPI_ISL_1012734, EPI_ISL_1012735, EPI_ISL_1012736, EPI_ISL_1012737, EPI_ISL_1012738, EPI_ISL_1012739, EPI_ISL_1012740, EPI_ISL_1012742, EPI_ISL_1012743, EPI_ISL_1012744, EPI_ISL_1012745, EPI_ISL_1012746, EPI_ISL_1012747, EPI_ISL_1012748, EPI_ISL_1012749, EPI_ISL_1012750, EPI_ISL_1012751, EPI_ISL_1012752, EPI_ISL_1012753, EPI_ISL_1012755, EPI_ISL_1012756, EPI_ISL_1012757, EPI_ISL_1012758, EPI_ISL_1012759, EPI_ISL_1012760, EPI_ISL_1012761, EPI_ISL_1012762, EPI_ISL_1012763, EPI_ISL_1012764, EPI_ISL_1012765, EPI_ISL_1012766, EPI_ISL_1012767, EPI_ISL_1012768, EPI_ISL_1012769, EPI_ISL_1012770, EPI_ISL_1012771, EPI_ISL_1012772, EPI_ISL_1012773, EPI_ISL_1012774, EPI_ISL_1012775, EPI_ISL_1012776, EPI_ISL_1012777, EPI_ISL_1012778, EPI_ISL_1012779, EPI_ISL_1012780, EPI_ISL_1012781, EPI_ISL_1012782, EPI_ISL_1012783, EPI_ISL_1012784, EPI_ISL_1012785, EPI_ISL_1012786                                                                                                                                                                                                                                                                                                                                                                                                                                                                                                                                                                                                                                                                                                                                                                                                                                                                                                                                                                                                                                                                                                                                                                                                                                                                                                                                                                                                                                                                                                                                                                                                                                                                                                                                                                                                                                                                                                                                                                                                                                                                                                                                                                                                                                                                                                                                                                                                                                                                                                                                                                                                                                                                                                                                                                                                                                                                                                                                                                                                                                                                                                                                                                                                                                                                                                                                                                                                                                                                                                                                                                                                                                                                                                                                                                                                                                                                                                                                                                                                                                                                                                                                                                                                                                                                                                                                                                                                                                                             |                                                                                                                                                                                  |                                                                            |                                                                                                                                                                                                                                                                                                                              |
| see above                                                                                                                                                                                                                                                                                                                                                                                                                                                                                                                                                                                                                                                                                                                                                                                                                                                                                                                                                                                                                                                                                                                                                                                                                                                                                                                                                                                                                                                                                                                                                                                                                                                                                                                                                                                                                                                                                                                                                                                                                                                                                                                                                                                                                                                                                                                                                                                                                                                                                                                                                                                                                                                                                                                                                                                                                                                                                                                                                                                                                                                                                                                                                                                                                                                                                                                                                                                                                                                                                                                                                                                                                                                                                                                                                                                                                                                                                                                                                                                                                                                                                                                                                                                                                                                                                                                                                                                                                                                                                                                                                                                                                                                                                                                                                                                                                                                                                                                                                                                                                                                                                                                                                                                                                                                                                                                                                                                                                                                                                                                                                                                                                                                                                                                                           | Lighthouse Lab in Alderley Park                                                                                                                                                  | Wellcome Sanger Institute for the COVID-19 Genomics UK (COG-UK) Consortium | Jacquelyn Wynn, Mairead Hyland, The Lighthouse Lab in Alderley Park and Alex Alderton, Roberto Amato, Sonia Goncalves, Ewan Harrison, David K. Jackson, Ian Johnston, Dominic Kwiatkowski, Cordelia Langford, John Sillitoe on behalf of the Wellcome Sanger Institute COVID-19 Surveillance Team                            |
| EPI_ISL_1019587, EPI_ISL_1019588, EPI_ISL_1019589, EPI_ISL_1019590, EPI_ISL_1019591, EPI_ISL_1019592, EPI_ISL_1019593, EPI_ISL_1019594, EPI_ISL_1019595, EPI_ISL_1019596, EPI_ISL_1019597, EPI_ISL_1019598, EPI_ISL_1019599, EPI_ISL_1019600, EPI_ISL_1019601, EPI_ISL_1019602, EPI_ISL_1019603, EPI_ISL_1019604, EPI_ISL_1019605, EPI_ISL_1019606, EPI_ISL_1019607, EPI_ISL_1019609, EPI_ISL_1019610, EPI_ISL_1019611, EPI_ISL_1019612, EPI_ISL_1019613, EPI_ISL_1019614, EPI_ISL_1019616, EPI_ISL_1019617, EPI_ISL_1019618, EPI_ISL_1019619, EPI_ISL_1019620, EPI_ISL_1019621, EPI_ISL_1019622, EPI_ISL_1019623, EPI_ISL_1019624, EPI_ISL_1019625, EPI_ISL_1019626, EPI_ISL_1019627, EPI_ISL_1019628, EPI_ISL_1019629, EPI_ISL_1019630, EPI_ISL_1019631, EPI_ISL_1019632, EPI_ISL_1019633, EPI_ISL_1019634, EPI_ISL_1019635, EPI_ISL_1019636, EPI_ISL_1019637, EPI_ISL_1019638, EPI_ISL_1019639, EPI_ISL_1019640, EPI_ISL_1019641, EPI_ISL_1019642, EPI_ISL_1019643, EPI_ISL_1019644, EPI_ISL_1019645, EPI_ISL_1019646, EPI_ISL_1019647, EPI_ISL_1019648, EPI_ISL_1019649, EPI_ISL_1019651, EPI_ISL_1019652, EPI_ISL_1019654, EPI_ISL_1019655, EPI_ISL_1019656, EPI_ISL_1019657, EPI_ISL_1019659, EPI_ISL_1019661, EPI_ISL_1019662, EPI_ISL_1019664, EPI_ISL_1019665, EPI_ISL_1019666, EPI_ISL_1019667, EPI_ISL_1019668, EPI_ISL_1019669, EPI_ISL_1019670, EPI_ISL_1019671, EPI_ISL_1019672, EPI_ISL_1019673, EPI_ISL_1019674, EPI_ISL_1019675, EPI_ISL_1019676, EPI_ISL_1019677, EPI_ISL_1019678, EPI_ISL_1019679, EPI_ISL_1019701, EPI_ISL_1019702, EPI_ISL_1019703, EPI_ISL_1019704, EPI_ISL_1019705, EPI_ISL_1019706, EPI_ISL_1019707, EPI_ISL_1019708, EPI_ISL_1019709, EPI_ISL_1019712, EPI_ISL_1019714, EPI_ISL_1019716, EPI_ISL_1019717, EPI_ISL_1019719, EPI_ISL_1019721, EPI_ISL_1019723, EPI_ISL_1019725, EPI_ISL_1019727, EPI_ISL_1019728, EPI_ISL_1019733, EPI_ISL_1019735, EPI_ISL_1019736, EPI_ISL_1019738, EPI_ISL_1019740, EPI_ISL_1019743, EPI_ISL_1019746, EPI_ISL_1019749, EPI_ISL_1019751, EPI_ISL_1019752, EPI_ISL_1019755, EPI_ISL_1019757, EPI_ISL_1019758, EPI_ISL_1019760, EPI_ISL_1019761, EPI_ISL_1019763, EPI_ISL_1019765, EPI_ISL_1019766, EPI_ISL_1019768, EPI_ISL_1019769, EPI_ISL_1019771, EPI_ISL_1019773, EPI_ISL_1019774, EPI_ISL_1019776, EPI_ISL_1019777, EPI_ISL_1019779                                                                                                                                                                                                                                                                                                                                                                                                                                                                                                                                                                                                                                                                                                                                                                                                                                                                                                                                                                                                                                                                                                                                                                                                                                                                                                                                                                                                                                                                                                                                                                                                                                                                                                                                                                                                                                                                                                                                                                                                                                                                                                                                                                                                                                                                                                                                                                                                                                                                                                                                                                                                                                                                                                                                                                                                                                                                                                                                                                                                                                                                                                                                                                                                                                                                                                                                                                                                                                   |                                                                                                                                                                                  |                                                                            |                                                                                                                                                                                                                                                                                                                              |
| see above                                                                                                                                                                                                                                                                                                                                                                                                                                                                                                                                                                                                                                                                                                                                                                                                                                                                                                                                                                                                                                                                                                                                                                                                                                                                                                                                                                                                                                                                                                                                                                                                                                                                                                                                                                                                                                                                                                                                                                                                                                                                                                                                                                                                                                                                                                                                                                                                                                                                                                                                                                                                                                                                                                                                                                                                                                                                                                                                                                                                                                                                                                                                                                                                                                                                                                                                                                                                                                                                                                                                                                                                                                                                                                                                                                                                                                                                                                                                                                                                                                                                                                                                                                                                                                                                                                                                                                                                                                                                                                                                                                                                                                                                                                                                                                                                                                                                                                                                                                                                                                                                                                                                                                                                                                                                                                                                                                                                                                                                                                                                                                                                                                                                                                                                           | Lighthouse Lab in Glasgow                                                                                                                                                        | Wellcome Sanger Institute for the COVID-19 Genomics UK (COG-UK) Consortium | Harper VanSteenhouse, Yumi Kasai, David Gray, Carol Clugston, Anna Dominiczak and Alex Alderton, Roberto Amato, Jeffrey Barrett, Sonia Goncalves, Ewan Harrison, David K. Jackson, Ian Johnston, Dominic Kwiatkowski, Cordelia Langford, John Sillitoe on behalf of the Wellcome Sanger Institute COVID-19 Surveillance Team |
| EPI_ISL_1043899, EPI_ISL_1043900, EPI_ISL_1043902, EPI_ISL_1043903, EPI_ISL_1043904, EPI_ISL_1043905, EPI_ISL_1043906, EPI_ISL_1043907, EPI_ISL_1043908, EPI_ISL_1043909, EPI_ISL_1043910, EPI_ISL_1043911, EPI_ISL_1043912, EPI_ISL_1043913, EPI_ISL_1043914, EPI_ISL_1043915, EPI_ISL_1043916, EPI_ISL_1043917, EPI_ISL_1043918, EPI_ISL_1043919, EPI_ISL_1043920, EPI_ISL_1043921, EPI_ISL_1043922, EPI_ISL_1043923, EPI_ISL_1043924, EPI_ISL_1043925, EPI_ISL_1043926, EPI_ISL_1043927, EPI_ISL_1043928, EPI_ISL_1043929, EPI_ISL_1043930, EPI_ISL_1043931, EPI_ISL_1043932, EPI_ISL_1043933, EPI_ISL_1043934, EPI_ISL_1043935, EPI_ISL_1043936, EPI_ISL_1043937, EPI_ISL_1043938, EPI_ISL_1043939, EPI_ISL_1043940, EPI_ISL_1043941, EPI_ISL_1043942, EPI_ISL_1043943, EPI_ISL_1043944, EPI_ISL_1043945, EPI_ISL_1043946, EPI_ISL_1043947, EPI_ISL_1043948, EPI_ISL_1043949, EPI_ISL_1043950, EPI_ISL_1043951, EPI_ISL_1043952, EPI_ISL_1043953, EPI_ISL_1043954, EPI_ISL_1043955, EPI_ISL_1043956, EPI_ISL_1043957, EPI_ISL_1043958, EPI_ISL_1043959, EPI_ISL_1043960, EPI_ISL_1043961, EPI_ISL_1043962, EPI_ISL_1043963, EPI_ISL_1043964, EPI_ISL_1043965, EPI_ISL_1043966, EPI_ISL_1043967, EPI_ISL_1043968, EPI_ISL_1043969, EPI_ISL_1043970, EPI_ISL_1043971, EPI_ISL_1043972, EPI_ISL_1043973, EPI_ISL_1043974, EPI_ISL_1043975, EPI_ISL_1043976, EPI_ISL_1043977, EPI_ISL_1043978, EPI_ISL_1043979, EPI_ISL_1043980, EPI_ISL_1043981, EPI_ISL_1043982, EPI_ISL_1043983, EPI_ISL_1043984, EPI_ISL_1043985, EPI_ISL_1043986, EPI_ISL_1043987, EPI_ISL_1043988, EPI_ISL_1043989, EPI_ISL_1043990, EPI_ISL_1043991, EPI_ISL_1043992, EPI_ISL_1043993, EPI_ISL_1043994, EPI_ISL_1043995, EPI_ISL_1043996, EPI_ISL_1043997, EPI_ISL_1043998, EPI_ISL_1043999, EPI_ISL_1044000, EPI_ISL_1044001, EPI_ISL_1044002, EPI_ISL_1044003, EPI_ISL_1044004, EPI_ISL_1044005, EPI_ISL_1044006, EPI_ISL_1044007, EPI_ISL_1044008, EPI_ISL_1044009, EPI_ISL_1044010, EPI_ISL_1044011, EPI_ISL_1044012, EPI_ISL_1044013, EPI_ISL_1044014, EPI_ISL_1044015, EPI_ISL_1044016, EPI_ISL_1044017, EPI_ISL_1044018, EPI_ISL_1044019, EPI_ISL_1044020, EPI_ISL_1044021, EPI_ISL_1044022, EPI_ISL_1044023, EPI_ISL_1044024, EPI_ISL_1044025, EPI_ISL_1044026, EPI_ISL_1044027, EPI_ISL_1044028, EPI_ISL_1044029, EPI_ISL_1044030, EPI_ISL_1044031, EPI_ISL_1044032, EPI_ISL_1044033, EPI_ISL_1044034, EPI_ISL_1044035, EPI_ISL_1044036, EPI_ISL_1044037, EPI_ISL_1044038, EPI_ISL_1044039, EPI_ISL_1044040, EPI_ISL_1044041, EPI_ISL_1044042, EPI_ISL_1044043, EPI_ISL_1044044, EPI_ISL_1044045, EPI_ISL_1044046, EPI_ISL_1044047, EPI_ISL_1044048, EPI_ISL_1044049, EPI_ISL_1044050, EPI_ISL_1044051, EPI_ISL_1044052, EPI_ISL_1044053, EPI_ISL_1044054, EPI_ISL_1044055, EPI_ISL_1044056, EPI_ISL_1044057, EPI_ISL_1044058, EPI_ISL_1044059, EPI_ISL_1044060, EPI_ISL_1044061, EPI_ISL_1044062, EPI_ISL_1044063, EPI_ISL_1044064, EPI_ISL_1044065, EPI_ISL_1044066, EPI_ISL_1044067, EPI_ISL_1044068, EPI_ISL_1044069, EPI_ISL_1044070, EPI_ISL_1044071, EPI_ISL_1044072, EPI_ISL_1044073, EPI_ISL_1044074, EPI_ISL_1044075, EPI_ISL_1044076, EPI_ISL_1044077, EPI_ISL_1044078, EPI_ISL_1044079, EPI_ISL_1044080, EPI_ISL_1044081, EPI_ISL_1044082, EPI_ISL_1044083, EPI_ISL_1044084, EPI_ISL_1044085, EPI_ISL_1044086, EPI_ISL_1044087, EPI_ISL_1044088, EPI_ISL_1044089, EPI_ISL_1044090, EPI_ISL_1044091, EPI_ISL_1044092, EPI_ISL_1044093, EPI_ISL_1044094, EPI_ISL_1044095, EPI_ISL_1044096, EPI_ISL_1044097, EPI_ISL_1044098, EPI_ISL_1044099, EPI_ISL_1044100, EPI_ISL_1044101, EPI_ISL_1044102, EPI_ISL_1044103, EPI_ISL_1044104, EPI_ISL_1044105, EPI_ISL_1044106, EPI_ISL_1044107, EPI_ISL_1044108, EPI_ISL_1044109, EPI_ISL_1044110, EPI_ISL_1044111, EPI_ISL_1044112, EPI_ISL_1044113, EPI_ISL_1044114, EPI_ISL_1044115, EPI_ISL_1044116, EPI_ISL_1044117, EPI_ISL_1044118, EPI_ISL_1044119, EPI_ISL_1044120, EPI_ISL_1044121, EPI_ISL_1044122, EPI_ISL_1044123, EPI_ISL_1044124, EPI_ISL_1044125, EPI_ISL_1044126, EPI_ISL_1044127, EPI_ISL_1044128, EPI_ISL_1044129, EPI_ISL_1044130, EPI_ISL_1044131, EPI_ISL_1044132, EPI_ISL_1044133, EPI_ISL_1044134, EPI_ISL_1044135, EPI_ISL_1044136, EPI_ISL_1044137, EPI_ISL_1044138, EPI_ISL_1044139, EPI_ISL_1044140, EPI_ISL_1044141, EPI_ISL_1044142, EPI_ISL_1044143, EPI_ISL_1044144, EPI_ISL_1044145, EPI_ISL_1044146, EPI_ISL_1044147, EPI_ISL_1044148, EPI_ISL_1044149, EPI_ISL_1044150, EPI_ISL_1044151, EPI_ISL_1044152, EPI_ISL_1044153, EPI_ISL_1044154, EPI_ISL_1044155, EPI_ISL_1044156, EPI_ISL_1044157, EPI_ISL_1044158, EPI_ISL_1044159, EPI_ISL_1044160, EPI_ISL_1044161, EPI_ISL_1044162, EPI_ISL_1044163, EPI_ISL_1044164, EPI_ISL_1044165, EPI_ISL_1044166, EPI_ISL_1044167, EPI_ISL_1044168, EPI_ISL_1044169, EPI_ISL_1044170, EPI_ISL_1044171, EPI_ISL_1044172, EPI_ISL_1044173, EPI_ISL_1044174, EPI_ISL_1044175, EPI_ISL_1044176, EPI_ISL_1044177, EPI_ISL_1044178, EPI_ISL_1044179, EPI_ISL_1044180, EPI_ISL_1044181, EPI_ISL_1044182, EPI_ISL_1044183, EPI_ISL_1044184, EPI_ISL_1044185, EPI_ISL_1044186, EPI_ISL_1044187, EPI_ISL_1044188, EPI_ISL_1044189, EPI_ISL_1044190, EPI_ISL_1044191, EPI_ISL_1044192, EPI_ISL_1044193, EPI_ISL_1044194, EPI_ISL_1044195, EPI_ISL_1044196, EPI_ISL_1044197, EPI_ISL_1044198, EPI_ISL_1044199, EPI_ISL_1044200, EPI_ISL_1044201, EPI_ISL_1044202, EPI_ISL_1044203, EPI_ISL_1044204, EPI_ISL_1044205, EPI_ISL_1044206, EPI_ISL_1044207, EPI_ISL_1044208, EPI_ISL_1044209, EPI_ISL_1044210, EPI_ISL_1044211, EPI_ISL_1044212, EPI_ISL_1044213, EPI_ISL_1044214, EPI_ISL_1044215, EPI_ISL_1044216, EPI_ISL_1044217, EPI_ISL_1044218, EPI_ISL_1044219, EPI_ISL_1044220, EPI_ISL_1044221, EPI_ISL_1044222, EPI_ISL_1044223, EPI_ISL_1044224 |                                                                                                                                                                                  |                                                                            |                                                                                                                                                                                                                                                                                                                              |
| see above                                                                                                                                                                                                                                                                                                                                                                                                                                                                                                                                                                                                                                                                                                                                                                                                                                                                                                                                                                                                                                                                                                                                                                                                                                                                                                                                                                                                                                                                                                                                                                                                                                                                                                                                                                                                                                                                                                                                                                                                                                                                                                                                                                                                                                                                                                                                                                                                                                                                                                                                                                                                                                                                                                                                                                                                                                                                                                                                                                                                                                                                                                                                                                                                                                                                                                                                                                                                                                                                                                                                                                                                                                                                                                                                                                                                                                                                                                                                                                                                                                                                                                                                                                                                                                                                                                                                                                                                                                                                                                                                                                                                                                                                                                                                                                                                                                                                                                                                                                                                                                                                                                                                                                                                                                                                                                                                                                                                                                                                                                                                                                                                                                                                                                                                           | Lighthouse Lab in Alderley Park                                                                                                                                                  | Wellcome Sanger Institute for the COVID-19 Genomics UK (COG-UK) Consortium | Jacquelyn Wynn, Mairead Hyland, The Lighthouse Lab in Alderley Park and Alex Alderton, Roberto Amato, Jeffrey Barrett, Sonia Goncalves, Ewan Harrison, David K. Jackson, Ian Johnston, Dominic Kwiatkowski, Cordelia Langford, John Sillitoe on behalf of the Wellcome Sanger Institute COVID-19 Surveillance Team           |
| EPI_ISL_1045980, EPI_ISL_1045981, EPI_ISL_1045982, EPI_ISL_1045984, EPI_ISL_1045985, EPI_ISL_1045986, EPI_ISL_1045987, EPI_ISL_1045988, EPI_ISL_1045989, EPI_ISL_1045990, EPI_ISL_1045991, EPI_ISL_1045992, EPI_ISL_1045993, EPI_ISL_1045994, EPI_ISL_1045995, EPI_ISL_1045996, EPI_ISL_1045997,                                                                                                                                                                                                                                                                                                                                                                                                                                                                                                                                                                                                                                                                                                                                                                                                                                                                                                                                                                                                                                                                                                                                                                                                                                                                                                                                                                                                                                                                                                                                                                                                                                                                                                                                                                                                                                                                                                                                                                                                                                                                                                                                                                                                                                                                                                                                                                                                                                                                                                                                                                                                                                                                                                                                                                                                                                                                                                                                                                                                                                                                                                                                                                                                                                                                                                                                                                                                                                                                                                                                                                                                                                                                                                                                                                                                                                                                                                                                                                                                                                                                                                                                                                                                                                                                                                                                                                                                                                                                                                                                                                                                                                                                                                                                                                                                                                                                                                                                                                                                                                                                                                                                                                                                                                                                                                                                                                                                                                                    |                                                                                                                                                                                  |                                                                            |                                                                                                                                                                                                                                                                                                                              |

|                                                                                                                                                                                                                                                                                                                                                                                                                                                                                                                                                                                                                                                                                                                                                                                                                                                                                                                                                                                                                                                                                                                                                                                                                                                                                                                                                                                                                                                                                                                                                                                                                                                                                                                                                                                                                                                                                                                                                                                                                                                                                                                                                                                                                                                                                                                                                                                                                                                                                                                                                                                                                                                                                                                                                                                                                                                                                                                                                                                                                                                                                                                                                                                                                                                                                                                                                                                                                                                                                                                                                                                                                                                                                                                                                                                                                                                                                                                                                                                                                                                                                                                                                                                                                                                                                                                                                                                                                                                                                                                                                                                                                                                                                                                                                                                                                                                                                                                                                                                                                                                                                                                                                                                                                                                                                                                                                                                                                                                                                                                                                                                                                                                                                                                                                                                                                                                                                                                                                                                                                                                                                                                                                                                                                                                                                                                                                                                                                                                                                                                                                                                                                                                                                                                                                                                                                                                                                                                                                                                                                                                                                                                                                                                                                                                                                                                                                                                                                                                                                                                                                                                                                                                                 |                                                                                                                         |                                                                                                                                                                                  |                                                                                                                                                                                                                                                                                                                                                                                                                                                                                                                                                                                                                                                                                       |                                                                                                                                                                                                                                                                                                                                                                                                                                          |
|-----------------------------------------------------------------------------------------------------------------------------------------------------------------------------------------------------------------------------------------------------------------------------------------------------------------------------------------------------------------------------------------------------------------------------------------------------------------------------------------------------------------------------------------------------------------------------------------------------------------------------------------------------------------------------------------------------------------------------------------------------------------------------------------------------------------------------------------------------------------------------------------------------------------------------------------------------------------------------------------------------------------------------------------------------------------------------------------------------------------------------------------------------------------------------------------------------------------------------------------------------------------------------------------------------------------------------------------------------------------------------------------------------------------------------------------------------------------------------------------------------------------------------------------------------------------------------------------------------------------------------------------------------------------------------------------------------------------------------------------------------------------------------------------------------------------------------------------------------------------------------------------------------------------------------------------------------------------------------------------------------------------------------------------------------------------------------------------------------------------------------------------------------------------------------------------------------------------------------------------------------------------------------------------------------------------------------------------------------------------------------------------------------------------------------------------------------------------------------------------------------------------------------------------------------------------------------------------------------------------------------------------------------------------------------------------------------------------------------------------------------------------------------------------------------------------------------------------------------------------------------------------------------------------------------------------------------------------------------------------------------------------------------------------------------------------------------------------------------------------------------------------------------------------------------------------------------------------------------------------------------------------------------------------------------------------------------------------------------------------------------------------------------------------------------------------------------------------------------------------------------------------------------------------------------------------------------------------------------------------------------------------------------------------------------------------------------------------------------------------------------------------------------------------------------------------------------------------------------------------------------------------------------------------------------------------------------------------------------------------------------------------------------------------------------------------------------------------------------------------------------------------------------------------------------------------------------------------------------------------------------------------------------------------------------------------------------------------------------------------------------------------------------------------------------------------------------------------------------------------------------------------------------------------------------------------------------------------------------------------------------------------------------------------------------------------------------------------------------------------------------------------------------------------------------------------------------------------------------------------------------------------------------------------------------------------------------------------------------------------------------------------------------------------------------------------------------------------------------------------------------------------------------------------------------------------------------------------------------------------------------------------------------------------------------------------------------------------------------------------------------------------------------------------------------------------------------------------------------------------------------------------------------------------------------------------------------------------------------------------------------------------------------------------------------------------------------------------------------------------------------------------------------------------------------------------------------------------------------------------------------------------------------------------------------------------------------------------------------------------------------------------------------------------------------------------------------------------------------------------------------------------------------------------------------------------------------------------------------------------------------------------------------------------------------------------------------------------------------------------------------------------------------------------------------------------------------------------------------------------------------------------------------------------------------------------------------------------------------------------------------------------------------------------------------------------------------------------------------------------------------------------------------------------------------------------------------------------------------------------------------------------------------------------------------------------------------------------------------------------------------------------------------------------------------------------------------------------------------------------------------------------------------------------------------------------------------------------------------------------------------------------------------------------------------------------------------------------------------------------------------------------------------------------------------------------------------------------------------------------------------------------------------------------------------------------------------------------------------------------------------------------------------------------|-------------------------------------------------------------------------------------------------------------------------|----------------------------------------------------------------------------------------------------------------------------------------------------------------------------------|---------------------------------------------------------------------------------------------------------------------------------------------------------------------------------------------------------------------------------------------------------------------------------------------------------------------------------------------------------------------------------------------------------------------------------------------------------------------------------------------------------------------------------------------------------------------------------------------------------------------------------------------------------------------------------------|------------------------------------------------------------------------------------------------------------------------------------------------------------------------------------------------------------------------------------------------------------------------------------------------------------------------------------------------------------------------------------------------------------------------------------------|
| EPI_ISL_1045998, EPI_ISL_1045999, EPI_ISL_1046000, EPI_ISL_1046001, EPI_ISL_1046002, EPI_ISL_1046003, EPI_ISL_1046004, EPI_ISL_1046005, EPI_ISL_1046006, EPI_ISL_1046007, EPI_ISL_1046008, EPI_ISL_1046009, EPI_ISL_1046010, EPI_ISL_1046011, EPI_ISL_1046012, EPI_ISL_1046013, EPI_ISL_1046014, EPI_ISL_1046015, EPI_ISL_1046016, EPI_ISL_1046017, EPI_ISL_1046018, EPI_ISL_1046019, EPI_ISL_1046020, EPI_ISL_1046021, EPI_ISL_1046022, EPI_ISL_1046023, EPI_ISL_1046024, EPI_ISL_1046025, EPI_ISL_1046026, EPI_ISL_1046027, EPI_ISL_1046028, EPI_ISL_1046029, EPI_ISL_1046030, EPI_ISL_1046031, EPI_ISL_1046032, EPI_ISL_1046033, EPI_ISL_1046034, EPI_ISL_1046035, EPI_ISL_1046036, EPI_ISL_1046037, EPI_ISL_1046038, EPI_ISL_1046039, EPI_ISL_1046040, EPI_ISL_1046041, EPI_ISL_1046042, EPI_ISL_1046043, EPI_ISL_1046044, EPI_ISL_1046045, EPI_ISL_1046046, EPI_ISL_1046047, EPI_ISL_1046048, EPI_ISL_1046049, EPI_ISL_1046050, EPI_ISL_1046051, EPI_ISL_1046052, EPI_ISL_1046053, EPI_ISL_1046054, EPI_ISL_1046055, EPI_ISL_1046056, EPI_ISL_1046057, EPI_ISL_1046058, EPI_ISL_1046059, EPI_ISL_1046060, EPI_ISL_1046061, EPI_ISL_1046062, EPI_ISL_1046063, EPI_ISL_1046064, EPI_ISL_1046065, EPI_ISL_1046066, EPI_ISL_1046067, EPI_ISL_1046068, EPI_ISL_1046069, EPI_ISL_1046070, EPI_ISL_1046071, EPI_ISL_1046072, EPI_ISL_1046073, EPI_ISL_1046074, EPI_ISL_1046075, EPI_ISL_1046076, EPI_ISL_1046077, EPI_ISL_1046078, EPI_ISL_1046079, EPI_ISL_1046080, EPI_ISL_1046081, EPI_ISL_1046082, EPI_ISL_1046083, EPI_ISL_1046084, EPI_ISL_1046085, EPI_ISL_1046086, EPI_ISL_1046087, EPI_ISL_1046088, EPI_ISL_1046089, EPI_ISL_1046090, EPI_ISL_1046091, EPI_ISL_1046092, EPI_ISL_1046093, EPI_ISL_1046094, EPI_ISL_1046095, EPI_ISL_1046096, EPI_ISL_1046097, EPI_ISL_1046098, EPI_ISL_1046099, EPI_ISL_1046100, EPI_ISL_1046101, EPI_ISL_1046102, EPI_ISL_1046103, EPI_ISL_1046104, EPI_ISL_1046105, EPI_ISL_1046106, EPI_ISL_1046107, EPI_ISL_1046108, EPI_ISL_1046109, EPI_ISL_1046110, EPI_ISL_1046111, EPI_ISL_1046112, EPI_ISL_1046113, EPI_ISL_1046114, EPI_ISL_1046115, EPI_ISL_1046117, EPI_ISL_1046118, EPI_ISL_1046119, EPI_ISL_1046120, EPI_ISL_1046121, EPI_ISL_1046122, EPI_ISL_1046123, EPI_ISL_1046124, EPI_ISL_1046125, EPI_ISL_1046126, EPI_ISL_1046127, EPI_ISL_1046128, EPI_ISL_1046129, EPI_ISL_1046130, EPI_ISL_1046131, EPI_ISL_1046132, EPI_ISL_1046133, EPI_ISL_1046134, EPI_ISL_1046135, EPI_ISL_1046136, EPI_ISL_1046137, EPI_ISL_1046138, EPI_ISL_1046139, EPI_ISL_1046140, EPI_ISL_1046141, EPI_ISL_1046142, EPI_ISL_1046143, EPI_ISL_1046144, EPI_ISL_1046145, EPI_ISL_1046146, EPI_ISL_1046147, EPI_ISL_1046148, EPI_ISL_1046149, EPI_ISL_1046150, EPI_ISL_1046151, EPI_ISL_1046152, EPI_ISL_1046153, EPI_ISL_1046154, EPI_ISL_1046155, EPI_ISL_1046156, EPI_ISL_1046157, EPI_ISL_1046158, EPI_ISL_1046159, EPI_ISL_1046160, EPI_ISL_1046161, EPI_ISL_1046162, EPI_ISL_1046163, EPI_ISL_1046164, EPI_ISL_1046165, EPI_ISL_1046166, EPI_ISL_1046167, EPI_ISL_1046168, EPI_ISL_1046169, EPI_ISL_1046170, EPI_ISL_1046171, EPI_ISL_1046172, EPI_ISL_1046173, EPI_ISL_1046174, EPI_ISL_1046175, EPI_ISL_1046176, EPI_ISL_1046177, EPI_ISL_1046178, EPI_ISL_1046179, EPI_ISL_1046180, EPI_ISL_1046181, EPI_ISL_1046182, EPI_ISL_1046183, EPI_ISL_1046184, EPI_ISL_1046185, EPI_ISL_1046186, EPI_ISL_1046187, EPI_ISL_1046188, EPI_ISL_1046189, EPI_ISL_1046190, EPI_ISL_1046191, EPI_ISL_1046192, EPI_ISL_1046193, EPI_ISL_1046194, EPI_ISL_1046195, EPI_ISL_1046196, EPI_ISL_1046197, EPI_ISL_1046198, EPI_ISL_1046199, EPI_ISL_1046200, EPI_ISL_1046201, EPI_ISL_1046202, EPI_ISL_1046203, EPI_ISL_1046204, EPI_ISL_1046205, EPI_ISL_1046206, EPI_ISL_1046207, EPI_ISL_1046208, EPI_ISL_1046209, EPI_ISL_1046210, EPI_ISL_1046211, EPI_ISL_1046212, EPI_ISL_1046213, EPI_ISL_1046214, EPI_ISL_1046215, EPI_ISL_1046216, EPI_ISL_1046217, EPI_ISL_1046218, EPI_ISL_1046219, EPI_ISL_1046220, EPI_ISL_1046221, EPI_ISL_1046222, EPI_ISL_1046223, EPI_ISL_1046224, EPI_ISL_1046225, EPI_ISL_1046226, EPI_ISL_1046227, EPI_ISL_1046228, EPI_ISL_1046229, EPI_ISL_1046230, EPI_ISL_1046231, EPI_ISL_1046232, EPI_ISL_1046233, EPI_ISL_1046234, EPI_ISL_1046235, EPI_ISL_1046236, EPI_ISL_1046237, EPI_ISL_1046238, EPI_ISL_1046239, EPI_ISL_1046240, EPI_ISL_1046241, EPI_ISL_1046242, EPI_ISL_1046243, EPI_ISL_1046244, EPI_ISL_1046245, EPI_ISL_1046246, EPI_ISL_1046247, EPI_ISL_1046248, EPI_ISL_1046249, EPI_ISL_1046250, EPI_ISL_1046251, EPI_ISL_1046252, EPI_ISL_1046253, EPI_ISL_1046254, EPI_ISL_1046255, EPI_ISL_1046256, EPI_ISL_1046257, EPI_ISL_1046258, EPI_ISL_1046259, EPI_ISL_1046260, EPI_ISL_1046261, EPI_ISL_1046262, EPI_ISL_1046263, EPI_ISL_1046264, EPI_ISL_1046265, EPI_ISL_1046266, EPI_ISL_1046267, EPI_ISL_1046268, EPI_ISL_1046269, EPI_ISL_1046270, EPI_ISL_1046271, EPI_ISL_1046272, EPI_ISL_1046273, EPI_ISL_1046274, EPI_ISL_1046275, EPI_ISL_1046276, EPI_ISL_1046277, EPI_ISL_1046278, EPI_ISL_1046279, EPI_ISL_1046280, EPI_ISL_1046281, EPI_ISL_1046282, EPI_ISL_1046283, EPI_ISL_1046284, EPI_ISL_1046285, EPI_ISL_1046286, EPI_ISL_1046287, EPI_ISL_1046288, EPI_ISL_1046289, EPI_ISL_1046290, EPI_ISL_1046291, EPI_ISL_1046292, EPI_ISL_1046293, EPI_ISL_1046294, EPI_ISL_1046295, EPI_ISL_1046296, EPI_ISL_1046297, EPI_ISL_1046298, EPI_ISL_1046299, EPI_ISL_1046300, EPI_ISL_1046301, EPI_ISL_1046302, EPI_ISL_1046303, EPI_ISL_1046304, EPI_ISL_1046305, EPI_ISL_1046306, EPI_ISL_1046307, EPI_ISL_1046308, EPI_ISL_1046309, EPI_ISL_1046310, EPI_ISL_1046311, EPI_ISL_1046312, EPI_ISL_1046313, EPI_ISL_1046314, EPI_ISL_1046315, EPI_ISL_1046316, EPI_ISL_1046317, EPI_ISL_1046318, EPI_ISL_1046319, EPI_ISL_1046320, EPI_ISL_1046321, EPI_ISL_1046322, EPI_ISL_1046323, EPI_ISL_1046324, EPI_ISL_1046325, EPI_ISL_1046326, EPI_ISL_1046327, EPI_ISL_1046328, EPI_ISL_1046329, EPI_ISL_1046330, EPI_ISL_1046331, EPI_ISL_1046332, EPI_ISL_1046333, EPI_ISL_1046334, EPI_ISL_1046335                                                                                                                                                                                                                                                                                                                                                                                                                                                                                                                                                                                                                                                                                                                                                                                                                                                                                                                                                                                                                                                                                                                                                                                                                                                                                                                                                                                                                                                                                                                                                                                                                                                                                                 | see above                                                                                                               | Randox Laboratories                                                                                                                                                              | Wellcome Sanger Institute for the COVID-19 Genomics UK (COG-UK) Consortium                                                                                                                                                                                                                                                                                                                                                                                                                                                                                                                                                                                                            | Randox Laboratories and Alex Alderton, Roberto Amato, Jeffrey Barrett, Sonia Goncalves, Ewan Harrison, David K. Jackson, Ian Johnston, Dominic Kwiatkowski, Cordelia Langford, John Sillitoe on behalf of the Wellcome Sanger Institute COVID-19 Surveillance Team                                                                                                                                                                       |
| EPI_ISL_1046990, EPI_ISL_1046995, EPI_ISL_1047011, EPI_ISL_1047019, EPI_ISL_1047034, EPI_ISL_1047036, EPI_ISL_1047045, EPI_ISL_1047049                                                                                                                                                                                                                                                                                                                                                                                                                                                                                                                                                                                                                                                                                                                                                                                                                                                                                                                                                                                                                                                                                                                                                                                                                                                                                                                                                                                                                                                                                                                                                                                                                                                                                                                                                                                                                                                                                                                                                                                                                                                                                                                                                                                                                                                                                                                                                                                                                                                                                                                                                                                                                                                                                                                                                                                                                                                                                                                                                                                                                                                                                                                                                                                                                                                                                                                                                                                                                                                                                                                                                                                                                                                                                                                                                                                                                                                                                                                                                                                                                                                                                                                                                                                                                                                                                                                                                                                                                                                                                                                                                                                                                                                                                                                                                                                                                                                                                                                                                                                                                                                                                                                                                                                                                                                                                                                                                                                                                                                                                                                                                                                                                                                                                                                                                                                                                                                                                                                                                                                                                                                                                                                                                                                                                                                                                                                                                                                                                                                                                                                                                                                                                                                                                                                                                                                                                                                                                                                                                                                                                                                                                                                                                                                                                                                                                                                                                                                                                                                                                                                          |                                                                                                                         | University of Birmingham                                                                                                                                                         | COVID-19 Genomics UK (COG-UK) Consortium                                                                                                                                                                                                                                                                                                                                                                                                                                                                                                                                                                                                                                              | Institute of Microbiology, University of Birmingham: Claire McMurrary, Joanne Stockton, Samuel Nicholls, Radoslaw Popiawski, Will Rowe, Josh Quick, Nicholas Loman. University of Birmingham Testing Laboratory: Celina M Whalley, Andrew Bosworth, Charlotte Poxon, Kasun Wanigasooriya, Oliver Pickles, Mike Kidd, Alex Richter, Andrew D Beggs PHE Heartlands Lab: Husam Osman, Andrew Bosworth. Queen Elizabeth Hospital: Anna Casey |
| EPI_ISL_1047148, EPI_ISL_1047149, EPI_ISL_1047150, EPI_ISL_1047151, EPI_ISL_1047152, EPI_ISL_1047153, EPI_ISL_1047154, EPI_ISL_1047155, EPI_ISL_1047156, EPI_ISL_1047157, EPI_ISL_1047158, EPI_ISL_1047159, EPI_ISL_1047160, EPI_ISL_1047161, EPI_ISL_1047162, EPI_ISL_1047163, EPI_ISL_1047164, EPI_ISL_1047165, EPI_ISL_1047166, EPI_ISL_1047167, EPI_ISL_1047168, EPI_ISL_1047169, EPI_ISL_1047170, EPI_ISL_1047171, EPI_ISL_1047172, EPI_ISL_1047173, EPI_ISL_1047174, EPI_ISL_1047175, EPI_ISL_1047176, EPI_ISL_1047177, EPI_ISL_1047178, EPI_ISL_1047179, EPI_ISL_1047180, EPI_ISL_1047181, EPI_ISL_1047182, EPI_ISL_1047183, EPI_ISL_1047185, EPI_ISL_1047186, EPI_ISL_1047187, EPI_ISL_1047188, EPI_ISL_1047189, EPI_ISL_1047190, EPI_ISL_1047191, EPI_ISL_1047192, EPI_ISL_1047193, EPI_ISL_1047194, EPI_ISL_1047195, EPI_ISL_1047196, EPI_ISL_1047197, EPI_ISL_1047198, EPI_ISL_1047199, EPI_ISL_1047200, EPI_ISL_1047201, EPI_ISL_1047202, EPI_ISL_1047203, EPI_ISL_1047204, EPI_ISL_1047205, EPI_ISL_1047206, EPI_ISL_1047207, EPI_ISL_1047208, EPI_ISL_1047209, EPI_ISL_1047210, EPI_ISL_1047211, EPI_ISL_1047212, EPI_ISL_1047213, EPI_ISL_1047214, EPI_ISL_1047215, EPI_ISL_1047216, EPI_ISL_1047217, EPI_ISL_1047218, EPI_ISL_1047219, EPI_ISL_1047220, EPI_ISL_1047221, EPI_ISL_1047222, EPI_ISL_1047223, EPI_ISL_1047224, EPI_ISL_1047225, EPI_ISL_1047226, EPI_ISL_1047227, EPI_ISL_1047228, EPI_ISL_1047229, EPI_ISL_1047230, EPI_ISL_1047231, EPI_ISL_1047232, EPI_ISL_1047233, EPI_ISL_1047234, EPI_ISL_1047235, EPI_ISL_1047236, EPI_ISL_1047237, EPI_ISL_1047238, EPI_ISL_1047239, EPI_ISL_1047240, EPI_ISL_1047241, EPI_ISL_1047242, EPI_ISL_1047243, EPI_ISL_1047244, EPI_ISL_1047245, EPI_ISL_1047246, EPI_ISL_1047247, EPI_ISL_1047248, EPI_ISL_1047249, EPI_ISL_1047250, EPI_ISL_1047251, EPI_ISL_1047252, EPI_ISL_1047253, EPI_ISL_1047254, EPI_ISL_1047255, EPI_ISL_1047256, EPI_ISL_1047257, EPI_ISL_1047258, EPI_ISL_1047259, EPI_ISL_1047260, EPI_ISL_1047261, EPI_ISL_1047262, EPI_ISL_1047263, EPI_ISL_1047264, EPI_ISL_1047265, EPI_ISL_1047266, EPI_ISL_1047267, EPI_ISL_1047268, EPI_ISL_1047269, EPI_ISL_1047270, EPI_ISL_1047271, EPI_ISL_1047272, EPI_ISL_1047273, EPI_ISL_1047274, EPI_ISL_1047275, EPI_ISL_1047276, EPI_ISL_1047277, EPI_ISL_1047278, EPI_ISL_1047279, EPI_ISL_1047280, EPI_ISL_1047281, EPI_ISL_1047282, EPI_ISL_1047283, EPI_ISL_1047284, EPI_ISL_1047285, EPI_ISL_1047286, EPI_ISL_1047287, EPI_ISL_1047288, EPI_ISL_1047289, EPI_ISL_1047290, EPI_ISL_1047291, EPI_ISL_1047292, EPI_ISL_1047293, EPI_ISL_1047294, EPI_ISL_1047295, EPI_ISL_1047296, EPI_ISL_1047297, EPI_ISL_1047298, EPI_ISL_1047299, EPI_ISL_1047300, EPI_ISL_1047301, EPI_ISL_1047302, EPI_ISL_1047303, EPI_ISL_1047304, EPI_ISL_1047305, EPI_ISL_1047306, EPI_ISL_1047307, EPI_ISL_1047308, EPI_ISL_1047309, EPI_ISL_1047310, EPI_ISL_1047311, EPI_ISL_1047312, EPI_ISL_1047313, EPI_ISL_1047314, EPI_ISL_1047315, EPI_ISL_1047316, EPI_ISL_1047317, EPI_ISL_1047318, EPI_ISL_1047319, EPI_ISL_1047320, EPI_ISL_1047321, EPI_ISL_1047322, EPI_ISL_1047323, EPI_ISL_1047324, EPI_ISL_1047325, EPI_ISL_1047326, EPI_ISL_1047327, EPI_ISL_1047328, EPI_ISL_1047329, EPI_ISL_1047330, EPI_ISL_1047331, EPI_ISL_1047332, EPI_ISL_1047333, EPI_ISL_1047334, EPI_ISL_1047335, EPI_ISL_1047336, EPI_ISL_1047337, EPI_ISL_1047338, EPI_ISL_1047339, EPI_ISL_1047340, EPI_ISL_1047341, EPI_ISL_1047342, EPI_ISL_1047343, EPI_ISL_1047344, EPI_ISL_1047345, EPI_ISL_1047346, EPI_ISL_1047347, EPI_ISL_1047348, EPI_ISL_1047349, EPI_ISL_1047350, EPI_ISL_1047351, EPI_ISL_1047352, EPI_ISL_1047353, EPI_ISL_1047354, EPI_ISL_1047355, EPI_ISL_1047356, EPI_ISL_1047357, EPI_ISL_1047358, EPI_ISL_1047359, EPI_ISL_1047360, EPI_ISL_1047361, EPI_ISL_1047362, EPI_ISL_1047363, EPI_ISL_1047364, EPI_ISL_1047365, EPI_ISL_1047366, EPI_ISL_1047367, EPI_ISL_1047368, EPI_ISL_1047369, EPI_ISL_1047370, EPI_ISL_1047371, EPI_ISL_1047372, EPI_ISL_1047373, EPI_ISL_1047374, EPI_ISL_1047375, EPI_ISL_1047376, EPI_ISL_1047377, EPI_ISL_1047378, EPI_ISL_1047379, EPI_ISL_1047380, EPI_ISL_1047381, EPI_ISL_1047382, EPI_ISL_1047383, EPI_ISL_1047384, EPI_ISL_1047385, EPI_ISL_1047386, EPI_ISL_1047387, EPI_ISL_1047388, EPI_ISL_1047389, EPI_ISL_1047390, EPI_ISL_1047391, EPI_ISL_1047392, EPI_ISL_1047393, EPI_ISL_1047394, EPI_ISL_1047395, EPI_ISL_1047396, EPI_ISL_1047397, EPI_ISL_1047398, EPI_ISL_1047399, EPI_ISL_1047400, EPI_ISL_1047401, EPI_ISL_1047402, EPI_ISL_1047403, EPI_ISL_1047404, EPI_ISL_1047405, EPI_ISL_1047406, EPI_ISL_1047407, EPI_ISL_1047408, EPI_ISL_1047409, EPI_ISL_1047410, EPI_ISL_1047411, EPI_ISL_1047412, EPI_ISL_1047413, EPI_ISL_1047414, EPI_ISL_1047415, EPI_ISL_1047416, EPI_ISL_1047417, EPI_ISL_1047418, EPI_ISL_1047419, EPI_ISL_1047420, EPI_ISL_1047421, EPI_ISL_1047422, EPI_ISL_1047423, EPI_ISL_1047424, EPI_ISL_1047425, EPI_ISL_1047426, EPI_ISL_1047427, EPI_ISL_1047428, EPI_ISL_1047429, EPI_ISL_1047430, EPI_ISL_1047431, EPI_ISL_1047432, EPI_ISL_1047433, EPI_ISL_1047434, EPI_ISL_1047435, EPI_ISL_1047436, EPI_ISL_1047437, EPI_ISL_1047438, EPI_ISL_1047439, EPI_ISL_1047440, EPI_ISL_1047441, EPI_ISL_1047442, EPI_ISL_1047443, EPI_ISL_1047444, EPI_ISL_1047445, EPI_ISL_1047446, EPI_ISL_1047447, EPI_ISL_1047448, EPI_ISL_1047449, EPI_ISL_1047450, EPI_ISL_1047451, EPI_ISL_1047452, EPI_ISL_1047453, EPI_ISL_1047454, EPI_ISL_1047455, EPI_ISL_1047456, EPI_ISL_1047457, EPI_ISL_1047458, EPI_ISL_1047459, EPI_ISL_1047460, EPI_ISL_1047461, EPI_ISL_1047462, EPI_ISL_1047463, EPI_ISL_1047464, EPI_ISL_1047465, EPI_ISL_1047466, EPI_ISL_1047467, EPI_ISL_1047468, EPI_ISL_1047469, EPI_ISL_1047470, EPI_ISL_1047471, EPI_ISL_1047472, EPI_ISL_1047473, EPI_ISL_1047474, EPI_ISL_1047475, EPI_ISL_1047476, EPI_ISL_1047477, EPI_ISL_1047478, EPI_ISL_1047479, EPI_ISL_1047480, EPI_ISL_1047481, EPI_ISL_1047482, EPI_ISL_1047483, EPI_ISL_1047484, EPI_ISL_1047485, EPI_ISL_1047486, EPI_ISL_1047487, EPI_ISL_1047488, EPI_ISL_1047489, EPI_ISL_1047490, EPI_ISL_1047491, EPI_ISL_1047492, EPI_ISL_1047493, EPI_ISL_1047494, EPI_ISL_1047495, EPI_ISL_1047496, EPI_ISL_1047497, EPI_ISL_1047498, EPI_ISL_1047499, EPI_ISL_1047500, EPI_ISL_1047501, EPI_ISL_1047502, EPI_ISL_1047503, EPI_ISL_1047504, EPI_ISL_1047505, EPI_ISL_1047506, EPI_ISL_1047507, EPI_ISL_1047508, EPI_ISL_1047509, EPI_ISL_1047510, EPI_ISL_1047511, EPI_ISL_1047512, EPI_ISL_1047513, EPI_ISL_1047514, EPI_ISL_1047515, EPI_ISL_1047516, EPI_ISL_1047517, EPI_ISL_1047518, EPI_ISL_1047519, EPI_ISL_1047520, EPI_ISL_1047521, EPI_ISL_1047522, EPI_ISL_1047523, EPI_ISL_1047524, EPI_ISL_1047525, EPI_ISL_1047526, EPI_ISL_1047527, EPI_ISL_1047528, EPI_ISL_1047529, EPI_ISL_1047530, EPI_ISL_1047531, EPI_ISL_1047532, EPI_ISL_1047533, EPI_ISL_1047534, EPI_ISL_1047535, EPI_ISL_1047536, EPI_ISL_1047537, EPI_ISL_1047538, EPI_ISL_1047539, EPI_ISL_1047540, EPI_ISL_1047541, EPI_ISL_1047542, EPI_ISL_1047543, EPI_ISL_1047544, EPI_ISL_1047545, EPI_ISL_1047546, EPI_ISL_1047547, EPI_ISL_1047548, EPI_ISL_1047549, EPI_ISL_1047550, EPI_ISL_1047551, EPI_ISL_1047552, EPI_ISL_1047553, EPI_ISL_1047554, EPI_ISL_1047555, EPI_ISL_1047556, EPI_ISL_1047557, EPI_ISL_1047558, EPI_ISL_1047559, EPI_ISL_1047560, EPI_ISL_1047561, EPI_ISL_1047562, EPI_ISL_1047563, EPI_ISL_1047564, EPI_ISL_1047565, EPI_ISL_1047566, EPI_ISL_1047567, EPI_ISL_1047568, EPI_ISL_1047569, EPI_ISL_1047570, EPI_ISL_1047571, EPI_ISL_1047572, EPI_ISL_1047573, EPI_ISL_1047574, EPI_ISL_1047575, EPI_ISL_1047576, EPI_ISL_1047577, EPI_ISL_1047578, EPI_ISL_1047579, EPI_ISL_1047580, EPI_ISL_1047581 | see above                                                                                                               | Department of Pathology, University of Cambridge                                                                                                                                 | COVID-19 Genomics UK (COG-UK) Consortium                                                                                                                                                                                                                                                                                                                                                                                                                                                                                                                                                                                                                                              | Aminu S. Jahun, Yasmin Chaudhry, Iliana Georgana, Myra Hosmillo, Rhys Izuagbe, William L. Hamilton, Martin D. Curran, Surendra Parmar, Ian Goodfellow                                                                                                                                                                                                                                                                                    |
| EPI_ISL_1047679, EPI_ISL_1047680, EPI_ISL_1047681, EPI_ISL_1047682, EPI_ISL_1047683, EPI_ISL_1047684, EPI_ISL_1047686, EPI_ISL_1047687, EPI_ISL_1047688, EPI_ISL_1047689, EPI_ISL_1047690, EPI_ISL_1047691, EPI_ISL_1047692, EPI_ISL_1047693, EPI_ISL_1047694, EPI_ISL_1047695, EPI_ISL_1047696, EPI_ISL_1047697, EPI_ISL_1047698, EPI_ISL_1047699, EPI_ISL_1047700, EPI_ISL_1047701, EPI_ISL_1047702, EPI_ISL_1047703, EPI_ISL_1047705, EPI_ISL_1047706, EPI_ISL_1047707, EPI_ISL_1047708, EPI_ISL_1047709, EPI_ISL_1047710, EPI_ISL_1047711                                                                                                                                                                                                                                                                                                                                                                                                                                                                                                                                                                                                                                                                                                                                                                                                                                                                                                                                                                                                                                                                                                                                                                                                                                                                                                                                                                                                                                                                                                                                                                                                                                                                                                                                                                                                                                                                                                                                                                                                                                                                                                                                                                                                                                                                                                                                                                                                                                                                                                                                                                                                                                                                                                                                                                                                                                                                                                                                                                                                                                                                                                                                                                                                                                                                                                                                                                                                                                                                                                                                                                                                                                                                                                                                                                                                                                                                                                                                                                                                                                                                                                                                                                                                                                                                                                                                                                                                                                                                                                                                                                                                                                                                                                                                                                                                                                                                                                                                                                                                                                                                                                                                                                                                                                                                                                                                                                                                                                                                                                                                                                                                                                                                                                                                                                                                                                                                                                                                                                                                                                                                                                                                                                                                                                                                                                                                                                                                                                                                                                                                                                                                                                                                                                                                                                                                                                                                                                                                                                                                                                                                                                                   | see above                                                                                                               | Virology Department, Sheffield Teaching Hospitals NHS Foundation Trust/Department of Infection, Immunity and Cardiovascular Disease, The Medical School, University of Sheffield | COVID-19 Genomics UK (COG-UK) Consortium                                                                                                                                                                                                                                                                                                                                                                                                                                                                                                                                                                                                                                              | Thushan de Silva, Matthew Parker, Nikki Smith, Adri Angyal, Rebecca Brown, Luke Green, Rachel Tucker, Paul Parsons, Danielle Groves, Katie Johnson, Laura Carrilero, Alex Keeley, Dave Partridge, Matthew Wyles, Benjamin Lindsey, Mehmet Yavuz, Mohammad Raza, Cariad Evans                                                                                                                                                             |
| EPI_ISL_1047846                                                                                                                                                                                                                                                                                                                                                                                                                                                                                                                                                                                                                                                                                                                                                                                                                                                                                                                                                                                                                                                                                                                                                                                                                                                                                                                                                                                                                                                                                                                                                                                                                                                                                                                                                                                                                                                                                                                                                                                                                                                                                                                                                                                                                                                                                                                                                                                                                                                                                                                                                                                                                                                                                                                                                                                                                                                                                                                                                                                                                                                                                                                                                                                                                                                                                                                                                                                                                                                                                                                                                                                                                                                                                                                                                                                                                                                                                                                                                                                                                                                                                                                                                                                                                                                                                                                                                                                                                                                                                                                                                                                                                                                                                                                                                                                                                                                                                                                                                                                                                                                                                                                                                                                                                                                                                                                                                                                                                                                                                                                                                                                                                                                                                                                                                                                                                                                                                                                                                                                                                                                                                                                                                                                                                                                                                                                                                                                                                                                                                                                                                                                                                                                                                                                                                                                                                                                                                                                                                                                                                                                                                                                                                                                                                                                                                                                                                                                                                                                                                                                                                                                                                                                 | West of Scotland Specialist Virology Centre, NHSGGC / MRC-University of Glasgow Centre for Virus Research               | COVID-19 Genomics UK (COG-UK) Consortium                                                                                                                                         | Ana da Silva Filipe, Natasha Johnson, Kathy Smollett, Daniel Mair, Stephen Carmichael, Alice Broos, Lily Tong, Jenna Nichols, Kyriaki Nomikou; Sarah McDonald; Richard Orton, Joseph Hughes, Sreenu Vattipally, David L Robertson; Alasdair MacLean, Rory Gunson; Sharif Shaaban, Matthew Holden; Rachel Blacow, Guy Mollett, Kathy Li, James Shepherd, Antonia Ho, Emma Thomson                                                                                                                                                                                                                                                                                                      |                                                                                                                                                                                                                                                                                                                                                                                                                                          |
| EPI_ISL_1047860                                                                                                                                                                                                                                                                                                                                                                                                                                                                                                                                                                                                                                                                                                                                                                                                                                                                                                                                                                                                                                                                                                                                                                                                                                                                                                                                                                                                                                                                                                                                                                                                                                                                                                                                                                                                                                                                                                                                                                                                                                                                                                                                                                                                                                                                                                                                                                                                                                                                                                                                                                                                                                                                                                                                                                                                                                                                                                                                                                                                                                                                                                                                                                                                                                                                                                                                                                                                                                                                                                                                                                                                                                                                                                                                                                                                                                                                                                                                                                                                                                                                                                                                                                                                                                                                                                                                                                                                                                                                                                                                                                                                                                                                                                                                                                                                                                                                                                                                                                                                                                                                                                                                                                                                                                                                                                                                                                                                                                                                                                                                                                                                                                                                                                                                                                                                                                                                                                                                                                                                                                                                                                                                                                                                                                                                                                                                                                                                                                                                                                                                                                                                                                                                                                                                                                                                                                                                                                                                                                                                                                                                                                                                                                                                                                                                                                                                                                                                                                                                                                                                                                                                                                                 | Virology Department, Royal Infirmary of Edinburgh, NHS Lothian / School of Biological Sciences, University of Edinburgh | COVID-19 Genomics UK (COG-UK) Consortium                                                                                                                                         | McHugh M, Dewar R, Cotton S, Rooke S, O'Toole Á, Scher E, Hill V, McCrone JT, Colquhoun R, Yu X, Jackson B, Rambaut A, Templeton K                                                                                                                                                                                                                                                                                                                                                                                                                                                                                                                                                    |                                                                                                                                                                                                                                                                                                                                                                                                                                          |
| EPI_ISL_1048017, EPI_ISL_1048018, EPI_ISL_1048019, EPI_ISL_1048020, EPI_ISL_1048021, EPI_ISL_1048022                                                                                                                                                                                                                                                                                                                                                                                                                                                                                                                                                                                                                                                                                                                                                                                                                                                                                                                                                                                                                                                                                                                                                                                                                                                                                                                                                                                                                                                                                                                                                                                                                                                                                                                                                                                                                                                                                                                                                                                                                                                                                                                                                                                                                                                                                                                                                                                                                                                                                                                                                                                                                                                                                                                                                                                                                                                                                                                                                                                                                                                                                                                                                                                                                                                                                                                                                                                                                                                                                                                                                                                                                                                                                                                                                                                                                                                                                                                                                                                                                                                                                                                                                                                                                                                                                                                                                                                                                                                                                                                                                                                                                                                                                                                                                                                                                                                                                                                                                                                                                                                                                                                                                                                                                                                                                                                                                                                                                                                                                                                                                                                                                                                                                                                                                                                                                                                                                                                                                                                                                                                                                                                                                                                                                                                                                                                                                                                                                                                                                                                                                                                                                                                                                                                                                                                                                                                                                                                                                                                                                                                                                                                                                                                                                                                                                                                                                                                                                                                                                                                                                            | Liverpool Clinical Laboratories                                                                                         | COVID-19 Genomics UK (COG-UK) Consortium                                                                                                                                         | Sam Haldenby, Anita Lucey, Steve Paterson, Julian Hiscox, Alistair Darby, M Almsaud, A Alrezaihi, Muhannad Alruwaili, Stuart D Armstrong, Jones Benjamin, Eleanor G Bentay, Anu Chawla, Jordan J Clark, Angela Cowell, Richard Eccles, Isabel Garcia-Dorival, Matthew Gemmell, Alessandro Gerada, PKF Gilmore, Rachel Gregory, Ximeng Han, Catherine Hartley, Margaret Hughes, Miren Iturriza-Gomara, James Johnson, L Luu, Jenifer Manson, Charlotte Nelson, Elaine O'Toole, Cassie Olateji, Rebekah Penrice-Randal , Lucille Rainbow, N.P Randle, Trevor Ian Robinson, Parul Sharma, Ghada T Shawli, James P Stewart, Neil Swainston, Ecaterina Vamos, Joanne Watts, Mark Whitehead |                                                                                                                                                                                                                                                                                                                                                                                                                                          |
| EPI_ISL_1048054, EPI_ISL_1048055, EPI_ISL_1048057, EPI_ISL_1048058, EPI_ISL_1048059, EPI_ISL_1048062, EPI_ISL_1048066, EPI_ISL_1048069, EPI_ISL_1048076, EPI_ISL_1048089, EPI_ISL_1048097                                                                                                                                                                                                                                                                                                                                                                                                                                                                                                                                                                                                                                                                                                                                                                                                                                                                                                                                                                                                                                                                                                                                                                                                                                                                                                                                                                                                                                                                                                                                                                                                                                                                                                                                                                                                                                                                                                                                                                                                                                                                                                                                                                                                                                                                                                                                                                                                                                                                                                                                                                                                                                                                                                                                                                                                                                                                                                                                                                                                                                                                                                                                                                                                                                                                                                                                                                                                                                                                                                                                                                                                                                                                                                                                                                                                                                                                                                                                                                                                                                                                                                                                                                                                                                                                                                                                                                                                                                                                                                                                                                                                                                                                                                                                                                                                                                                                                                                                                                                                                                                                                                                                                                                                                                                                                                                                                                                                                                                                                                                                                                                                                                                                                                                                                                                                                                                                                                                                                                                                                                                                                                                                                                                                                                                                                                                                                                                                                                                                                                                                                                                                                                                                                                                                                                                                                                                                                                                                                                                                                                                                                                                                                                                                                                                                                                                                                                                                                                                                       | see above                                                                                                               | Barts Health NHS Trust                                                                                                                                                           | COVID-19 Genomics UK (COG-UK) Consortium                                                                                                                                                                                                                                                                                                                                                                                                                                                                                                                                                                                                                                              | CUTINO-MOGUEL, Maria-Teresa; HARRINGTON, David; OWOYEMI, Dola; KULASEGARAN-SHYLINI, Raghavendran; BROAD, Claire; KELE, Beatrix                                                                                                                                                                                                                                                                                                           |
| EPI_ISL_1048139, EPI_ISL_1048140, EPI_ISL_1048141, EPI_ISL_1048142, EPI_ISL_1048143, EPI_ISL_1048144, EPI_ISL_1048145, EPI_ISL_1048146, EPI_ISL_1048147, EPI_ISL_1048148, EPI_ISL_1048149, EPI_ISL_1048150, EPI_ISL_1048151, EPI_ISL_1048152, EPI_ISL_1048153, EPI_ISL_1048154, EPI_ISL_1048155, EPI_ISL_1048156, EPI_ISL_1048157, EPI_ISL_1048158, EPI_ISL_1048159, EPI_ISL_1048160, EPI_ISL_1048161, EPI_ISL_1048162, EPI_ISL_1048163, EPI_ISL_1048164, EPI_ISL_1048165, EPI_ISL_1048166, EPI_ISL_1048167, EPI_ISL_1048168, EPI_ISL_1048169, EPI_ISL_1048170, EPI_ISL_1048171, EPI_ISL_1048172, EPI_ISL_1048173, EPI_ISL_10                                                                                                                                                                                                                                                                                                                                                                                                                                                                                                                                                                                                                                                                                                                                                                                                                                                                                                                                                                                                                                                                                                                                                                                                                                                                                                                                                                                                                                                                                                                                                                                                                                                                                                                                                                                                                                                                                                                                                                                                                                                                                                                                                                                                                                                                                                                                                                                                                                                                                                                                                                                                                                                                                                                                                                                                                                                                                                                                                                                                                                                                                                                                                                                                                                                                                                                                                                                                                                                                                                                                                                                                                                                                                                                                                                                                                                                                                                                                                                                                                                                                                                                                                                                                                                                                                                                                                                                                                                                                                                                                                                                                                                                                                                                                                                                                                                                                                                                                                                                                                                                                                                                                                                                                                                                                                                                                                                                                                                                                                                                                                                                                                                                                                                                                                                                                                                                                                                                                                                                                                                                                                                                                                                                                                                                                                                                                                                                                                                                                                                                                                                                                                                                                                                                                                                                                                                                                                                                                                                                                                                   |                                                                                                                         |                                                                                                                                                                                  |                                                                                                                                                                                                                                                                                                                                                                                                                                                                                                                                                                                                                                                                                       |                                                                                                                                                                                                                                                                                                                                                                                                                                          |

|                                                                                                                                                                                                                                                                                                                                                                                                                                                                                                                                                                                                                                                                                                                                                                                                                                                                                                                                                                                                                                                                                                                                                                                                                                                                                                                                                                                                                                                                                                                                                                                                                                                                                                                                                                                                                                                                                                                                                                                                                                                                                                                                                                                                                                                                                                                                                                                                                                                                                                                                                                                                                                                                                                                                                                                                                                                                                                                                                                                                                                                                                                                                                                                                                                                                                                                                                                                                                                                                                                                                                                                                                                                                                |                                                                                                                                                                                                                     |                                                                            |                                                                                                                                                                                                                                                                                                                                                                                                                                                                                                                                                                                                                                                                                          |
|--------------------------------------------------------------------------------------------------------------------------------------------------------------------------------------------------------------------------------------------------------------------------------------------------------------------------------------------------------------------------------------------------------------------------------------------------------------------------------------------------------------------------------------------------------------------------------------------------------------------------------------------------------------------------------------------------------------------------------------------------------------------------------------------------------------------------------------------------------------------------------------------------------------------------------------------------------------------------------------------------------------------------------------------------------------------------------------------------------------------------------------------------------------------------------------------------------------------------------------------------------------------------------------------------------------------------------------------------------------------------------------------------------------------------------------------------------------------------------------------------------------------------------------------------------------------------------------------------------------------------------------------------------------------------------------------------------------------------------------------------------------------------------------------------------------------------------------------------------------------------------------------------------------------------------------------------------------------------------------------------------------------------------------------------------------------------------------------------------------------------------------------------------------------------------------------------------------------------------------------------------------------------------------------------------------------------------------------------------------------------------------------------------------------------------------------------------------------------------------------------------------------------------------------------------------------------------------------------------------------------------------------------------------------------------------------------------------------------------------------------------------------------------------------------------------------------------------------------------------------------------------------------------------------------------------------------------------------------------------------------------------------------------------------------------------------------------------------------------------------------------------------------------------------------------------------------------------------------------------------------------------------------------------------------------------------------------------------------------------------------------------------------------------------------------------------------------------------------------------------------------------------------------------------------------------------------------------------------------------------------------------------------------------------------------|---------------------------------------------------------------------------------------------------------------------------------------------------------------------------------------------------------------------|----------------------------------------------------------------------------|------------------------------------------------------------------------------------------------------------------------------------------------------------------------------------------------------------------------------------------------------------------------------------------------------------------------------------------------------------------------------------------------------------------------------------------------------------------------------------------------------------------------------------------------------------------------------------------------------------------------------------------------------------------------------------------|
|                                                                                                                                                                                                                                                                                                                                                                                                                                                                                                                                                                                                                                                                                                                                                                                                                                                                                                                                                                                                                                                                                                                                                                                                                                                                                                                                                                                                                                                                                                                                                                                                                                                                                                                                                                                                                                                                                                                                                                                                                                                                                                                                                                                                                                                                                                                                                                                                                                                                                                                                                                                                                                                                                                                                                                                                                                                                                                                                                                                                                                                                                                                                                                                                                                                                                                                                                                                                                                                                                                                                                                                                                                                                                | Foundation Trust/Department of Infection, Immunity and Cardiovascular Disease, The Medical School, University of Sheffield                                                                                          |                                                                            | Laura Carrilero, Alex Keeley, Dave Partridge, Matthew Wyles, Benjamin Lindsey, Mehmet Yavuz, Mohammad Raza, Cariad Evans                                                                                                                                                                                                                                                                                                                                                                                                                                                                                                                                                                 |
| EPI_ISL_1050225, EPI_ISL_1050227                                                                                                                                                                                                                                                                                                                                                                                                                                                                                                                                                                                                                                                                                                                                                                                                                                                                                                                                                                                                                                                                                                                                                                                                                                                                                                                                                                                                                                                                                                                                                                                                                                                                                                                                                                                                                                                                                                                                                                                                                                                                                                                                                                                                                                                                                                                                                                                                                                                                                                                                                                                                                                                                                                                                                                                                                                                                                                                                                                                                                                                                                                                                                                                                                                                                                                                                                                                                                                                                                                                                                                                                                                               | Lighthouse Lab in Glasgow / MRC-University of Glasgow Centre for Virus Research                                                                                                                                     | COVID-19 Genomics UK (COG-UK) Consortium                                   | Ana da Silva Filipe, Natasha Johnson, Kathy Smollett, Daniel Mair, Stephen Carmichael, Alice Broos, Lily Tong, Jenna Nichols, Kyriaki Nomikou; Sarah McDonald; Harper VanSteenhouse, Yumi Kasai, David Gray, Carol Clugston, Anna Dominiczak; Alasdair MacLean, Rory Gunson; Richard Orton, Joseph Hughes, Sreenu Vattipally, David L Robertson; Sharif Shaaban, Matthew Holden; Kathy Li, James Shepherd, Antonia Ho, Emma Thomson                                                                                                                                                                                                                                                      |
| EPI_ISL_1050356                                                                                                                                                                                                                                                                                                                                                                                                                                                                                                                                                                                                                                                                                                                                                                                                                                                                                                                                                                                                                                                                                                                                                                                                                                                                                                                                                                                                                                                                                                                                                                                                                                                                                                                                                                                                                                                                                                                                                                                                                                                                                                                                                                                                                                                                                                                                                                                                                                                                                                                                                                                                                                                                                                                                                                                                                                                                                                                                                                                                                                                                                                                                                                                                                                                                                                                                                                                                                                                                                                                                                                                                                                                                | Barts Health NHS Trust                                                                                                                                                                                              | COVID-19 Genomics UK (COG-UK) Consortium                                   | CUTINO-MOGUEL, Maria-Teresa; HARRINGTON, David; OWOYEMI, Dola; KULASEGARAN-SHYLINI, Raghavendran; BROAD, Claire; KELE, Beatrix                                                                                                                                                                                                                                                                                                                                                                                                                                                                                                                                                           |
| EPI_ISL_1050369, EPI_ISL_1050392                                                                                                                                                                                                                                                                                                                                                                                                                                                                                                                                                                                                                                                                                                                                                                                                                                                                                                                                                                                                                                                                                                                                                                                                                                                                                                                                                                                                                                                                                                                                                                                                                                                                                                                                                                                                                                                                                                                                                                                                                                                                                                                                                                                                                                                                                                                                                                                                                                                                                                                                                                                                                                                                                                                                                                                                                                                                                                                                                                                                                                                                                                                                                                                                                                                                                                                                                                                                                                                                                                                                                                                                                                               | University College London, Great Ormond Street Hospital for Children NHS Foundation Trust, Imperial College Healthcare NHS Trust                                                                                    | COVID-19 Genomics UK (COG-UK) Consortium                                   | Sergi Castellano, Rachel Williams, Mark Kristiansen, Paola Resende Silva, Sunando Roy, Tony Brooks, Helena Tutill, Paola Niola, Patricia Dyal, Charlotte Williams, Leysa Forrest, Yasmin Panchbhaya, Jacqueline Findlay, Samuel Weeks, Julianne Brown, Kathryn Harris, Paul Randell, James Price, Alison Holmes, Judith Breuer                                                                                                                                                                                                                                                                                                                                                           |
| EPI_ISL_1051222, EPI_ISL_1051223, EPI_ISL_1051224, EPI_ISL_1051225, EPI_ISL_1051226, EPI_ISL_1051227, EPI_ISL_1051228, EPI_ISL_1051229, EPI_ISL_1051230, EPI_ISL_1051231, EPI_ISL_1051232, EPI_ISL_1051233, EPI_ISL_1051234, EPI_ISL_1051235, EPI_ISL_1051236, EPI_ISL_1051237, EPI_ISL_1051238, EPI_ISL_1051239, EPI_ISL_1051240, EPI_ISL_1051241, EPI_ISL_1051242, EPI_ISL_1051243                                                                                                                                                                                                                                                                                                                                                                                                                                                                                                                                                                                                                                                                                                                                                                                                                                                                                                                                                                                                                                                                                                                                                                                                                                                                                                                                                                                                                                                                                                                                                                                                                                                                                                                                                                                                                                                                                                                                                                                                                                                                                                                                                                                                                                                                                                                                                                                                                                                                                                                                                                                                                                                                                                                                                                                                                                                                                                                                                                                                                                                                                                                                                                                                                                                                                           |                                                                                                                                                                                                                     |                                                                            |                                                                                                                                                                                                                                                                                                                                                                                                                                                                                                                                                                                                                                                                                          |
| see above                                                                                                                                                                                                                                                                                                                                                                                                                                                                                                                                                                                                                                                                                                                                                                                                                                                                                                                                                                                                                                                                                                                                                                                                                                                                                                                                                                                                                                                                                                                                                                                                                                                                                                                                                                                                                                                                                                                                                                                                                                                                                                                                                                                                                                                                                                                                                                                                                                                                                                                                                                                                                                                                                                                                                                                                                                                                                                                                                                                                                                                                                                                                                                                                                                                                                                                                                                                                                                                                                                                                                                                                                                                                      | Northumbria University / South Tees Hospitals NHS Foundation Trust / North Cumbria Integrated Care NHS Foundation Trust / North Tees and Hartlepool NHS Foundation Trust / Newcastle Hospitals NHS Foundation Trust | COVID-19 Genomics UK (COG-UK) Consortium                                   | Darren L Smith,Andrew Nelson,Matthew Bashton,Greg R Young,Joshua Loh,John Allan,Mohammad A Tariq,Giles S Holt,Gary Black,Wen C Yew,Lynn Dover,Paul Baker,Steve Liggett,Sarah Essex,Jane Greenaway,Debra Padgett,Clive Graham,Garren Scott,Edward Barton,Emma Swindells,Brendan Payne,Jennifer Collins,Yusra Taha,Gary Eltringham                                                                                                                                                                                                                                                                                                                                                         |
| EPI_ISL_1051597, EPI_ISL_1051609, EPI_ISL_1051610, EPI_ISL_1051611, EPI_ISL_1051612, EPI_ISL_1051613, EPI_ISL_1051615, EPI_ISL_1051616, EPI_ISL_1051617, EPI_ISL_1051619, EPI_ISL_1051621, EPI_ISL_1051622, EPI_ISL_1051623, EPI_ISL_1051624, EPI_ISL_1051625, EPI_ISL_1051628, EPI_ISL_1051632, EPI_ISL_1051633, EPI_ISL_1051636, EPI_ISL_1051660, EPI_ISL_1051670, EPI_ISL_1051675, EPI_ISL_1051676, EPI_ISL_1051681, EPI_ISL_1051682, EPI_ISL_1051690, EPI_ISL_1051893, EPI_ISL_1051894, EPI_ISL_1051895, EPI_ISL_1051896, EPI_ISL_1051897, EPI_ISL_1051904, EPI_ISL_1051905                                                                                                                                                                                                                                                                                                                                                                                                                                                                                                                                                                                                                                                                                                                                                                                                                                                                                                                                                                                                                                                                                                                                                                                                                                                                                                                                                                                                                                                                                                                                                                                                                                                                                                                                                                                                                                                                                                                                                                                                                                                                                                                                                                                                                                                                                                                                                                                                                                                                                                                                                                                                                                                                                                                                                                                                                                                                                                                                                                                                                                                                                                |                                                                                                                                                                                                                     |                                                                            |                                                                                                                                                                                                                                                                                                                                                                                                                                                                                                                                                                                                                                                                                          |
| see above                                                                                                                                                                                                                                                                                                                                                                                                                                                                                                                                                                                                                                                                                                                                                                                                                                                                                                                                                                                                                                                                                                                                                                                                                                                                                                                                                                                                                                                                                                                                                                                                                                                                                                                                                                                                                                                                                                                                                                                                                                                                                                                                                                                                                                                                                                                                                                                                                                                                                                                                                                                                                                                                                                                                                                                                                                                                                                                                                                                                                                                                                                                                                                                                                                                                                                                                                                                                                                                                                                                                                                                                                                                                      | Oxford Viromics, NDM, University of Oxford; Oxford University Hospitals; Basingstoke and North Hampshire Hospital                                                                                                   | COVID-19 Genomics UK (COG-UK) Consortium                                   | Tanya Golubchik, David Bonsall, George Macintyre, Amy Trebes, Mariateresa de Cesare, Catrin Moore, Alex Mobbs, Anita Justice, Robert Shaw, Monique Andersson, Timothy Peto, Emma Wise, Nathan Moore, Jessica Lynch, Nick Cortes, Matilde Mori, Stephen Kidd, David Buck, John Todd, Christophe Frase                                                                                                                                                                                                                                                                                                                                                                                     |
| EPI_ISL_1051920, EPI_ISL_1051922, EPI_ISL_1051923, EPI_ISL_1051924, EPI_ISL_1051925, EPI_ISL_1051926, EPI_ISL_1051927, EPI_ISL_1051928, EPI_ISL_1051929, EPI_ISL_1051930, EPI_ISL_1051932, EPI_ISL_1051933, EPI_ISL_1051934, EPI_ISL_1051935, EPI_ISL_1051936, EPI_ISL_1051937, EPI_ISL_1051938, EPI_ISL_1051939, EPI_ISL_1051940, EPI_ISL_1051941, EPI_ISL_1051942, EPI_ISL_1051943, EPI_ISL_1051944, EPI_ISL_1051946, EPI_ISL_1051947, EPI_ISL_1051948, EPI_ISL_1051949, EPI_ISL_1051950, EPI_ISL_1051952, EPI_ISL_1051953, EPI_ISL_1051954, EPI_ISL_1051955, EPI_ISL_1051956, EPI_ISL_1051957, EPI_ISL_1051958, EPI_ISL_1051959, EPI_ISL_1051961, EPI_ISL_1051962, EPI_ISL_1051963, EPI_ISL_1051964, EPI_ISL_1051966, EPI_ISL_1051967, EPI_ISL_1051968, EPI_ISL_1051969, EPI_ISL_1051970, EPI_ISL_1051971, EPI_ISL_1051972, EPI_ISL_1051973, EPI_ISL_1051974, EPI_ISL_1051975, EPI_ISL_1051976, EPI_ISL_1051978, EPI_ISL_1051979, EPI_ISL_1051981, EPI_ISL_1051982, EPI_ISL_1051983, EPI_ISL_1051984, EPI_ISL_1051985, EPI_ISL_1051986, EPI_ISL_1051987, EPI_ISL_1051988, EPI_ISL_1051989, EPI_ISL_1051990, EPI_ISL_1051991, EPI_ISL_1051992, EPI_ISL_1051993, EPI_ISL_1051994, EPI_ISL_1051995, EPI_ISL_1051997, EPI_ISL_1051998, EPI_ISL_1051999, EPI_ISL_1052000, EPI_ISL_1052001, EPI_ISL_1052002, EPI_ISL_1052003, EPI_ISL_1052004, EPI_ISL_1052005, EPI_ISL_1052006, EPI_ISL_1052007, EPI_ISL_1052008, EPI_ISL_1052009, EPI_ISL_1052010, EPI_ISL_1052011, EPI_ISL_1052012, EPI_ISL_1052013, EPI_ISL_1052014, EPI_ISL_1052015, EPI_ISL_1052016, EPI_ISL_1052017, EPI_ISL_1052018, EPI_ISL_1052021, EPI_ISL_1052022, EPI_ISL_1052024, EPI_ISL_1052025, EPI_ISL_1052026, EPI_ISL_1052027, EPI_ISL_1052029, EPI_ISL_1052031, EPI_ISL_1052033, EPI_ISL_1052034, EPI_ISL_1052035, EPI_ISL_1052036, EPI_ISL_1052038, EPI_ISL_1052039, EPI_ISL_1052041, EPI_ISL_1052042, EPI_ISL_1052043, EPI_ISL_1052044, EPI_ISL_1052045, EPI_ISL_1052047, EPI_ISL_1052048, EPI_ISL_1052050, EPI_ISL_1052051, EPI_ISL_1052052, EPI_ISL_1052053, EPI_ISL_1052055, EPI_ISL_1052056, EPI_ISL_1052058, EPI_ISL_1052060, EPI_ISL_1052061, EPI_ISL_1052062, EPI_ISL_1052063, EPI_ISL_1052064, EPI_ISL_1052065, EPI_ISL_1052066, EPI_ISL_1052067, EPI_ISL_1052068, EPI_ISL_1052070, EPI_ISL_1052071, EPI_ISL_1052072, EPI_ISL_1052073, EPI_ISL_1052074, EPI_ISL_1052075, EPI_ISL_1052076, EPI_ISL_1052077, EPI_ISL_1052078, EPI_ISL_1052079, EPI_ISL_1052080, EPI_ISL_1052081, EPI_ISL_1052082, EPI_ISL_1052083, EPI_ISL_1052084, EPI_ISL_1052086, EPI_ISL_1052087, EPI_ISL_1052088, EPI_ISL_1052089, EPI_ISL_1052090, EPI_ISL_1052091, EPI_ISL_1052092, EPI_ISL_1052094, EPI_ISL_1052095, EPI_ISL_1052098, EPI_ISL_1052099, EPI_ISL_1052100, EPI_ISL_1052101, EPI_ISL_1052102, EPI_ISL_1052103, EPI_ISL_1052104, EPI_ISL_1052105, EPI_ISL_1052106, EPI_ISL_1052107, EPI_ISL_1052109, EPI_ISL_1052110, EPI_ISL_1052111, EPI_ISL_1052112, EPI_ISL_1052116, EPI_ISL_1052117, EPI_ISL_1052118, EPI_ISL_1052128, EPI_ISL_1052129, EPI_ISL_1052132, EPI_ISL_1052133, EPI_ISL_1052134, EPI_ISL_1052136, EPI_ISL_1052137, EPI_ISL_1052203, EPI_ISL_1052204, EPI_ISL_1052462, EPI_ISL_1052465, EPI_ISL_1052473, EPI_ISL_1052474, EPI_ISL_1052480, EPI_ISL_1052511, EPI_ISL_1052512, EPI_ISL_1052513, EPI_ISL_1052514, EPI_ISL_1052515, EPI_ISL_1052516, EPI_ISL_1052521, EPI_ISL_1052523, EPI_ISL_1052524, EPI_ISL_1052525, EPI_ISL_1053502, EPI_ISL_1053521, EPI_ISL_1053522, EPI_ISL_1053548, EPI_ISL_1053549, EPI_ISL_1053550, EPI_ISL_1053551, EPI_ISL_1053553, EPI_ISL_1053555, EPI_ISL_1053556, EPI_ISL_1053557, EPI_ISL_1053559, EPI_ISL_1053560, EPI_ISL_1053561, EPI_ISL_1053563, EPI_ISL_1053564 |                                                                                                                                                                                                                     |                                                                            |                                                                                                                                                                                                                                                                                                                                                                                                                                                                                                                                                                                                                                                                                          |
| see above                                                                                                                                                                                                                                                                                                                                                                                                                                                                                                                                                                                                                                                                                                                                                                                                                                                                                                                                                                                                                                                                                                                                                                                                                                                                                                                                                                                                                                                                                                                                                                                                                                                                                                                                                                                                                                                                                                                                                                                                                                                                                                                                                                                                                                                                                                                                                                                                                                                                                                                                                                                                                                                                                                                                                                                                                                                                                                                                                                                                                                                                                                                                                                                                                                                                                                                                                                                                                                                                                                                                                                                                                                                                      | Originating lab: Wales Specialist Virology Centre Sequencing lab: Pathogen Genomics Unit                                                                                                                            | Public Health Wales Microbiology Cardiff Wales Specialist Virology Centre  | Catherine Moore, Johnathan Evans, Laura Gifford, Malorie Perry, Simon Cottrell, Angela Marchbank, Alec Birchley, Alexander Adams, Amy Gaskin, Bree Gatica-Wilcox, Jason Coombes, Joel Southgate, Lauren Gilbert, Lee Graham, Nicole Pacchiarini, Sara Kuzniene-Summerhayes, Sarah Taylor, Sophie Jones, Sara Rey, Matthew Bull, Joanne Watkins, Sally Corden, Tom Connor                                                                                                                                                                                                                                                                                                                 |
| EPI_ISL_1053844, EPI_ISL_1053845, EPI_ISL_1053846, EPI_ISL_1053847, EPI_ISL_1053848, EPI_ISL_1053849, EPI_ISL_1053850, EPI_ISL_1053853, EPI_ISL_1053854, EPI_ISL_1053855, EPI_ISL_1053892, EPI_ISL_1053898, EPI_ISL_1053899, EPI_ISL_1053899, EPI_ISL_1053900, EPI_ISL_1053901, EPI_ISL_1053902, EPI_ISL_1053933                                                                                                                                                                                                                                                                                                                                                                                                                                                                                                                                                                                                                                                                                                                                                                                                                                                                                                                                                                                                                                                                                                                                                                                                                                                                                                                                                                                                                                                                                                                                                                                                                                                                                                                                                                                                                                                                                                                                                                                                                                                                                                                                                                                                                                                                                                                                                                                                                                                                                                                                                                                                                                                                                                                                                                                                                                                                                                                                                                                                                                                                                                                                                                                                                                                                                                                                                               |                                                                                                                                                                                                                     |                                                                            |                                                                                                                                                                                                                                                                                                                                                                                                                                                                                                                                                                                                                                                                                          |
| see above                                                                                                                                                                                                                                                                                                                                                                                                                                                                                                                                                                                                                                                                                                                                                                                                                                                                                                                                                                                                                                                                                                                                                                                                                                                                                                                                                                                                                                                                                                                                                                                                                                                                                                                                                                                                                                                                                                                                                                                                                                                                                                                                                                                                                                                                                                                                                                                                                                                                                                                                                                                                                                                                                                                                                                                                                                                                                                                                                                                                                                                                                                                                                                                                                                                                                                                                                                                                                                                                                                                                                                                                                                                                      | Centre for Enzyme Innovation, University of Portsmouth / Translational Research Laboratory, Portsmouth Hospitals NHS Trust                                                                                          | COVID-19 Genomics UK (COG-UK) Consortium                                   | Angela Beckett,Salman Goudarzi,Christopher Fearn,Kate Cook,Katie Loveson,Sharon Glaysher,Scott Elliott,Samuel Robson                                                                                                                                                                                                                                                                                                                                                                                                                                                                                                                                                                     |
| EPI_ISL_1054396                                                                                                                                                                                                                                                                                                                                                                                                                                                                                                                                                                                                                                                                                                                                                                                                                                                                                                                                                                                                                                                                                                                                                                                                                                                                                                                                                                                                                                                                                                                                                                                                                                                                                                                                                                                                                                                                                                                                                                                                                                                                                                                                                                                                                                                                                                                                                                                                                                                                                                                                                                                                                                                                                                                                                                                                                                                                                                                                                                                                                                                                                                                                                                                                                                                                                                                                                                                                                                                                                                                                                                                                                                                                | Queens Medical Centre, Clinical Microbiology Department / DeepSeq Nottingham                                                                                                                                        | COVID-19 Genomics UK (COG-UK) Consortium                                   | Gemma Clark, Wendy Smith, Manjinder Khakh, Vicki M Fleming, Michelle M Lister, Hannah Howson-Wells, Jonathan Ball, Patrick McClure, Joseph Chappell, Theocharis Tsoleridis, Nadine Holmes, Matthew Carlisle, Christopher Moore, Fei Sang, Johnny Debebe, Victoria Wright, Matthew Loose                                                                                                                                                                                                                                                                                                                                                                                                  |
| EPI_ISL_1054531                                                                                                                                                                                                                                                                                                                                                                                                                                                                                                                                                                                                                                                                                                                                                                                                                                                                                                                                                                                                                                                                                                                                                                                                                                                                                                                                                                                                                                                                                                                                                                                                                                                                                                                                                                                                                                                                                                                                                                                                                                                                                                                                                                                                                                                                                                                                                                                                                                                                                                                                                                                                                                                                                                                                                                                                                                                                                                                                                                                                                                                                                                                                                                                                                                                                                                                                                                                                                                                                                                                                                                                                                                                                | University of Exeter                                                                                                                                                                                                | COVID-19 Genomics UK (COG-UK) Consortium                                   | Ben Temperton,Aaron Jeffries,Michelle Michelsen,Joanna Warwick-Dugdale,Audrey Farbos,Robyn Manley,Stephen Michell,Jane Masoli                                                                                                                                                                                                                                                                                                                                                                                                                                                                                                                                                            |
| EPI_ISL_1054815, EPI_ISL_1054830, EPI_ISL_1054834                                                                                                                                                                                                                                                                                                                                                                                                                                                                                                                                                                                                                                                                                                                                                                                                                                                                                                                                                                                                                                                                                                                                                                                                                                                                                                                                                                                                                                                                                                                                                                                                                                                                                                                                                                                                                                                                                                                                                                                                                                                                                                                                                                                                                                                                                                                                                                                                                                                                                                                                                                                                                                                                                                                                                                                                                                                                                                                                                                                                                                                                                                                                                                                                                                                                                                                                                                                                                                                                                                                                                                                                                              | Bioinformatics and Biostatistics Lab, Advanced Sequencing Facility                                                                                                                                                  | COVID-19 Genomics UK (COG-UK) Consortium                                   | Aengus Stewart,Jerome Nicod,Chelsea Sawyer,Laura Cubitt,Harshil Patel,Margaret Crawford                                                                                                                                                                                                                                                                                                                                                                                                                                                                                                                                                                                                  |
| EPI_ISL_1057726, EPI_ISL_1057727, EPI_ISL_1057728, EPI_ISL_1057729, EPI_ISL_1057730, EPI_ISL_1057731, EPI_ISL_1057733, EPI_ISL_1057734, EPI_ISL_1057735, EPI_ISL_1057736, EPI_ISL_1057737, EPI_ISL_1057738, EPI_ISL_1057739, EPI_ISL_1057740, EPI_ISL_1057741, EPI_ISL_1057742, EPI_ISL_1057743, EPI_ISL_1057744, EPI_ISL_1057746, EPI_ISL_1057747, EPI_ISL_1057748, EPI_ISL_1057749, EPI_ISL_1057750, EPI_ISL_1057751, EPI_ISL_1057752, EPI_ISL_1057753, EPI_ISL_1057754, EPI_ISL_1057755, EPI_ISL_1057756, EPI_ISL_1057757, EPI_ISL_1057758, EPI_ISL_1057759, EPI_ISL_1057760, EPI_ISL_1057761, EPI_ISL_1057762, EPI_ISL_1057763                                                                                                                                                                                                                                                                                                                                                                                                                                                                                                                                                                                                                                                                                                                                                                                                                                                                                                                                                                                                                                                                                                                                                                                                                                                                                                                                                                                                                                                                                                                                                                                                                                                                                                                                                                                                                                                                                                                                                                                                                                                                                                                                                                                                                                                                                                                                                                                                                                                                                                                                                                                                                                                                                                                                                                                                                                                                                                                                                                                                                                             |                                                                                                                                                                                                                     |                                                                            |                                                                                                                                                                                                                                                                                                                                                                                                                                                                                                                                                                                                                                                                                          |
| see above                                                                                                                                                                                                                                                                                                                                                                                                                                                                                                                                                                                                                                                                                                                                                                                                                                                                                                                                                                                                                                                                                                                                                                                                                                                                                                                                                                                                                                                                                                                                                                                                                                                                                                                                                                                                                                                                                                                                                                                                                                                                                                                                                                                                                                                                                                                                                                                                                                                                                                                                                                                                                                                                                                                                                                                                                                                                                                                                                                                                                                                                                                                                                                                                                                                                                                                                                                                                                                                                                                                                                                                                                                                                      | Lighthouse Lab in Alderley Park                                                                                                                                                                                     | Wellcome Sanger Institute for the COVID-19 Genomics UK (COG-UK) Consortium | Jacquelyn Wynn, Mairead Hyland, The Lighthouse Lab in Alderley Park and Alex Alderton, Roberto Amato, Jeffrey Barrett, Sonia Goncalves, Ewan Harrison, David K. Jackson, Ian Johnston, Dominic Kwiatkowski, Cordelia Langford, John Sillitoe on behalf of the Wellcome Sanger Institute COVID-19 Surveillance Team                                                                                                                                                                                                                                                                                                                                                                       |
| EPI_ISL_1103759                                                                                                                                                                                                                                                                                                                                                                                                                                                                                                                                                                                                                                                                                                                                                                                                                                                                                                                                                                                                                                                                                                                                                                                                                                                                                                                                                                                                                                                                                                                                                                                                                                                                                                                                                                                                                                                                                                                                                                                                                                                                                                                                                                                                                                                                                                                                                                                                                                                                                                                                                                                                                                                                                                                                                                                                                                                                                                                                                                                                                                                                                                                                                                                                                                                                                                                                                                                                                                                                                                                                                                                                                                                                | University of Exeter                                                                                                                                                                                                | COVID-19 Genomics UK (COG-UK) Consortium                                   | Ben Temperton,Aaron Jeffries,Michelle Michelsen,Joanna Warwick-Dugdale,Audrey Farbos,Robyn Manley,Stephen Michell,Jane Masoli                                                                                                                                                                                                                                                                                                                                                                                                                                                                                                                                                            |
| EPI_ISL_1103936, EPI_ISL_1103937, EPI_ISL_1103938, EPI_ISL_1103939, EPI_ISL_1103940, EPI_ISL_1103941, EPI_ISL_1103942, EPI_ISL_1103943, EPI_ISL_1103944, EPI_ISL_1103946, EPI_ISL_1103947, EPI_ISL_1103948                                                                                                                                                                                                                                                                                                                                                                                                                                                                                                                                                                                                                                                                                                                                                                                                                                                                                                                                                                                                                                                                                                                                                                                                                                                                                                                                                                                                                                                                                                                                                                                                                                                                                                                                                                                                                                                                                                                                                                                                                                                                                                                                                                                                                                                                                                                                                                                                                                                                                                                                                                                                                                                                                                                                                                                                                                                                                                                                                                                                                                                                                                                                                                                                                                                                                                                                                                                                                                                                     |                                                                                                                                                                                                                     |                                                                            |                                                                                                                                                                                                                                                                                                                                                                                                                                                                                                                                                                                                                                                                                          |
| see above                                                                                                                                                                                                                                                                                                                                                                                                                                                                                                                                                                                                                                                                                                                                                                                                                                                                                                                                                                                                                                                                                                                                                                                                                                                                                                                                                                                                                                                                                                                                                                                                                                                                                                                                                                                                                                                                                                                                                                                                                                                                                                                                                                                                                                                                                                                                                                                                                                                                                                                                                                                                                                                                                                                                                                                                                                                                                                                                                                                                                                                                                                                                                                                                                                                                                                                                                                                                                                                                                                                                                                                                                                                                      | Department of Pathology, University of Cambridge                                                                                                                                                                    | COVID-19 Genomics UK (COG-UK) Consortium                                   | Aminu S. Jahun, Yasmin Chaudhry, Iliana Georgana, Myra Hosmillo, Rhys Izuagbe, William L. Hamilton, Martin D. Curran, Surendra Parmar, Ian Goodfellow                                                                                                                                                                                                                                                                                                                                                                                                                                                                                                                                    |
| EPI_ISL_1104225, EPI_ISL_1104226, EPI_ISL_1104227                                                                                                                                                                                                                                                                                                                                                                                                                                                                                                                                                                                                                                                                                                                                                                                                                                                                                                                                                                                                                                                                                                                                                                                                                                                                                                                                                                                                                                                                                                                                                                                                                                                                                                                                                                                                                                                                                                                                                                                                                                                                                                                                                                                                                                                                                                                                                                                                                                                                                                                                                                                                                                                                                                                                                                                                                                                                                                                                                                                                                                                                                                                                                                                                                                                                                                                                                                                                                                                                                                                                                                                                                              | Virology Department, Royal Infirmary of Edinburgh, NHS Lothian / School of Biological Sciences, University of Edinburgh                                                                                             | COVID-19 Genomics UK (COG-UK) Consortium                                   | McHugh M, Dewar R, Cotton S, Rooke S, O'Toole Á, Scher E, Hill V, McCrone JT, Colquhoun R, Yu X, Jackson B, Rambaut A, Templeton K                                                                                                                                                                                                                                                                                                                                                                                                                                                                                                                                                       |
| EPI_ISL_1104322, EPI_ISL_1104323, EPI_ISL_1104387, EPI_ISL_1104498, EPI_ISL_1104504                                                                                                                                                                                                                                                                                                                                                                                                                                                                                                                                                                                                                                                                                                                                                                                                                                                                                                                                                                                                                                                                                                                                                                                                                                                                                                                                                                                                                                                                                                                                                                                                                                                                                                                                                                                                                                                                                                                                                                                                                                                                                                                                                                                                                                                                                                                                                                                                                                                                                                                                                                                                                                                                                                                                                                                                                                                                                                                                                                                                                                                                                                                                                                                                                                                                                                                                                                                                                                                                                                                                                                                            | Liverpool Clinical Laboratories                                                                                                                                                                                     | COVID-19 Genomics UK (COG-UK) Consortium                                   | Sam Haldenby, Anita Lucaci, Steve Paterson, Julian Hiscox, Alistair Darby, M Almsaud, A Alrezaihi, Muhannad Alruwaili, Stuart D Armstrong, Jones Benjamin, Eleanor G Bentley, Anu Chawla, Jordan J Clark, Angela Cowell, Richard Eccles, Isabel García-Dorival, Matthew Gemmell, Alessandro Gerada, PKF Gilmore, Richard Gregory, Ximeng Han, Catherine Hartley, Margaret Hughes, Miren Iturriza-Gomara, James Johnson, L Luu, Jenifer Manson, Charlotte Nelson, Elaine O'Toole, Cassie Olateju, Rebekah Penrice-Randal , Lucille Rainbow, N.P Randle, Trevor Ian Robinson, Parul Sharma, Ghada T Shawli, James P Stewart, Neil Swainston, Ecaterina Vamos, Joanne Watts, Mark Whitehead |
| EPI_ISL_1104611, EPI_ISL_1104612, EPI_ISL_1104613, EPI_ISL_1104614, EPI_ISL_1104615, EPI_ISL_1104616, EPI_ISL_1104617, EPI_ISL_1104618, EPI_ISL_1104619                                                                                                                                                                                                                                                                                                                                                                                                                                                                                                                                                                                                                                                                                                                                                                                                                                                                                                                                                                                                                                                                                                                                                                                                                                                                                                                                                                                                                                                                                                                                                                                                                                                                                                                                                                                                                                                                                                                                                                                                                                                                                                                                                                                                                                                                                                                                                                                                                                                                                                                                                                                                                                                                                                                                                                                                                                                                                                                                                                                                                                                                                                                                                                                                                                                                                                                                                                                                                                                                                                                        | University College London, Great Ormond Street Hospital for Children NHS Foundation Trust, Imperial College Healthcare NHS Trust                                                                                    | COVID-19 Genomics UK (COG-UK) Consortium                                   | Sergi Castellano, Rachel Williams, Mark Kristiansen, Paola Resende Silva, Sunando Roy, Tony Brooks, Helena Tutill, Paola Niola, Patricia Dyal, Charlotte Williams, Leysa Forrest, Yasmin Panchbhaya, Jacqueline Findlay, Samuel Weeks, Julianne Brown, Kathryn Harris, Paul Randell, James Price, Alison Holmes, Judith Breuer                                                                                                                                                                                                                                                                                                                                                           |
| EPI_ISL_1104771, EPI_ISL_1104776, EPI_ISL_1104777, EPI_ISL_1104779, EPI_ISL_1104780, EPI_ISL_1104786, EPI_ISL_1104805, EPI_ISL_1104807, EPI_ISL_1104808, EPI_ISL_1104813, EPI_ISL_1104815, EPI_ISL_1104816, EPI_ISL_1104817, EPI_ISL_1104821, EPI_ISL_1104823, EPI_ISL_1104829, EPI_ISL_1104833, EPI_ISL_1104835, EPI_ISL_1104837, EPI_ISL_1104839, EPI_ISL_1104840, EPI_ISL_1104845, EPI_ISL_1104850, EPI_ISL_1104851, EPI_ISL_1104852, EPI_ISL_1104853, EPI_ISL_1104858, EPI_ISL_1104860, EPI_ISL_1104861, EPI_ISL_1104862, EPI_ISL_1104865, EPI_ISL_1104866, EPI_ISL_1104870, EPI_ISL_1104871, EPI_ISL_1105163, EPI_ISL_1105201, EPI_ISL_1105220, EPI_ISL_1105332, EPI_ISL_1105342, EPI_ISL_1105346, EPI_ISL_1105347                                                                                                                                                                                                                                                                                                                                                                                                                                                                                                                                                                                                                                                                                                                                                                                                                                                                                                                                                                                                                                                                                                                                                                                                                                                                                                                                                                                                                                                                                                                                                                                                                                                                                                                                                                                                                                                                                                                                                                                                                                                                                                                                                                                                                                                                                                                                                                                                                                                                                                                                                                                                                                                                                                                                                                                                                                                                                                                                                        |                                                                                                                                                                                                                     |                                                                            |                                                                                                                                                                                                                                                                                                                                                                                                                                                                                                                                                                                                                                                                                          |
| see above                                                                                                                                                                                                                                                                                                                                                                                                                                                                                                                                                                                                                                                                                                                                                                                                                                                                                                                                                                                                                                                                                                                                                                                                                                                                                                                                                                                                                                                                                                                                                                                                                                                                                                                                                                                                                                                                                                                                                                                                                                                                                                                                                                                                                                                                                                                                                                                                                                                                                                                                                                                                                                                                                                                                                                                                                                                                                                                                                                                                                                                                                                                                                                                                                                                                                                                                                                                                                                                                                                                                                                                                                                                                      | University College London Hospital                                                                                                                                                                                  | COVID-19 Genomics UK (COG-UK) Consortium                                   | Judith Heaney, Matthew Byott, Catherine Houlihan, Dan Frampton, Stuart Kirk, Moira Spyer and Eleni Nastouli                                                                                                                                                                                                                                                                                                                                                                                                                                                                                                                                                                              |
| EPI_ISL_1105463, EPI_ISL_1105465                                                                                                                                                                                                                                                                                                                                                                                                                                                                                                                                                                                                                                                                                                                                                                                                                                                                                                                                                                                                                                                                                                                                                                                                                                                                                                                                                                                                                                                                                                                                                                                                                                                                                                                                                                                                                                                                                                                                                                                                                                                                                                                                                                                                                                                                                                                                                                                                                                                                                                                                                                                                                                                                                                                                                                                                                                                                                                                                                                                                                                                                                                                                                                                                                                                                                                                                                                                                                                                                                                                                                                                                                                               | University College London, Great Ormond Street Hospital for Children NHS Foundation Trust, Imperial College Healthcare NHS Trust                                                                                    | COVID-19 Genomics UK (COG-UK) Consortium                                   | Sergi Castellano, Rachel Williams, Mark Kristiansen, Paola Resende Silva, Sunando Roy, Tony Brooks, Helena Tutill, Paola Niola, Patricia Dyal, Charlotte Williams, Leysa Forrest, Yasmin Panchbhaya, Jacqueline Findlay, Samuel Weeks, Julianne Brown, Kathryn Harris, Paul Randell, James Price, Alison Holmes, Judith Breuer                                                                                                                                                                                                                                                                                                                                                           |

|                                                                                                                                                                                                                                                                                                                                                                                                                                                                                                                                                                                                                                                                                                                                                                                                                                                                                                                                                                                                                                                                                                                                                                                                                                                                                                                                                                                                                                                                                                                                                                                                                                                                                                                                                                                                                                                                                                                                                                                                                                                                                                                                                                                                                                                                                                                                                                                                                                                                                                                                                                                                                                                                                                                                                                                                                                                 |                                                                                                                                                                                  |                                                                            |                                                                                                                                                                                                                                                                                                                                                                                                                                                                                                                                                                                                                                                                                                          |
|-------------------------------------------------------------------------------------------------------------------------------------------------------------------------------------------------------------------------------------------------------------------------------------------------------------------------------------------------------------------------------------------------------------------------------------------------------------------------------------------------------------------------------------------------------------------------------------------------------------------------------------------------------------------------------------------------------------------------------------------------------------------------------------------------------------------------------------------------------------------------------------------------------------------------------------------------------------------------------------------------------------------------------------------------------------------------------------------------------------------------------------------------------------------------------------------------------------------------------------------------------------------------------------------------------------------------------------------------------------------------------------------------------------------------------------------------------------------------------------------------------------------------------------------------------------------------------------------------------------------------------------------------------------------------------------------------------------------------------------------------------------------------------------------------------------------------------------------------------------------------------------------------------------------------------------------------------------------------------------------------------------------------------------------------------------------------------------------------------------------------------------------------------------------------------------------------------------------------------------------------------------------------------------------------------------------------------------------------------------------------------------------------------------------------------------------------------------------------------------------------------------------------------------------------------------------------------------------------------------------------------------------------------------------------------------------------------------------------------------------------------------------------------------------------------------------------------------------------|----------------------------------------------------------------------------------------------------------------------------------------------------------------------------------|----------------------------------------------------------------------------|----------------------------------------------------------------------------------------------------------------------------------------------------------------------------------------------------------------------------------------------------------------------------------------------------------------------------------------------------------------------------------------------------------------------------------------------------------------------------------------------------------------------------------------------------------------------------------------------------------------------------------------------------------------------------------------------------------|
| EPI_ISL_1105851, EPI_ISL_1105852, EPI_ISL_1105853, EPI_ISL_1105854, EPI_ISL_1105855, EPI_ISL_1105856, EPI_ISL_1105857, EPI_ISL_1105858, EPI_ISL_1105859, EPI_ISL_1105860                                                                                                                                                                                                                                                                                                                                                                                                                                                                                                                                                                                                                                                                                                                                                                                                                                                                                                                                                                                                                                                                                                                                                                                                                                                                                                                                                                                                                                                                                                                                                                                                                                                                                                                                                                                                                                                                                                                                                                                                                                                                                                                                                                                                                                                                                                                                                                                                                                                                                                                                                                                                                                                                        | Lincolnshire Hospitals and DeepSeq Nottingham                                                                                                                                    | COVID-19 Genomics UK (COG-UK) Consortium                                   | Nichola Duckworth, Tim Sloan, Sarah Walsh, Jonathan Ball, Patrick McClure, Joseph Chappell, Nadine Holmes, Matthew Carlisle, Christopher Moore, Fei Sang, Johnny Debebe, Victoria Wright, Matthew Loose                                                                                                                                                                                                                                                                                                                                                                                                                                                                                                  |
| EPI_ISL_1106645                                                                                                                                                                                                                                                                                                                                                                                                                                                                                                                                                                                                                                                                                                                                                                                                                                                                                                                                                                                                                                                                                                                                                                                                                                                                                                                                                                                                                                                                                                                                                                                                                                                                                                                                                                                                                                                                                                                                                                                                                                                                                                                                                                                                                                                                                                                                                                                                                                                                                                                                                                                                                                                                                                                                                                                                                                 | Originating lab: Wales Specialist Virology Centre Sequencing lab: Pathogen Genomics Unit                                                                                         | Public Health Wales Microbiology Cardiff Wales Specialist Virology Centre  | Catherine Moore, Johnathan Evans, Laura Gifford, Malorie Perry, Simon Cottrell, Angela Marchbank, Alec Birchley, Alexander Adams, Amy Gaskin, Bree Gatica-Wilcox, Jason Coombes, Joel Southgate, Lauren Gilbert, Lee Graham, Nicole Pacchiarini, Sara Kumziene-Summerhayes, Sarah Taylor, Sophie Jones, Sara Rey, Matthew Bull, Joanne Watkins, Sally Corden, Tom Connor                                                                                                                                                                                                                                                                                                                                 |
| EPI_ISL_1107634, EPI_ISL_1107635, EPI_ISL_1107636, EPI_ISL_1107650, EPI_ISL_1107651, EPI_ISL_1107652, EPI_ISL_1107653, EPI_ISL_1107654                                                                                                                                                                                                                                                                                                                                                                                                                                                                                                                                                                                                                                                                                                                                                                                                                                                                                                                                                                                                                                                                                                                                                                                                                                                                                                                                                                                                                                                                                                                                                                                                                                                                                                                                                                                                                                                                                                                                                                                                                                                                                                                                                                                                                                                                                                                                                                                                                                                                                                                                                                                                                                                                                                          | Centre for Enzyme Innovation, University of Portsmouth / Translational Research Laboratory, Portsmouth Hospitals NHS Trust                                                       | COVID-19 Genomics UK (COG-UK) Consortium                                   | Angela Beckett, Salman Goudarzi, Christopher Fearn, Kate Cook, Katie Loveson, Sharon Glaysher, Scott Elliott, Samuel Robson                                                                                                                                                                                                                                                                                                                                                                                                                                                                                                                                                                              |
| EPI_ISL_1108970, EPI_ISL_1108983, EPI_ISL_1109013, EPI_ISL_1109024, EPI_ISL_1109025, EPI_ISL_1109027, EPI_ISL_1109029, EPI_ISL_1109031, EPI_ISL_1109033, EPI_ISL_1109034, EPI_ISL_1109038, EPI_ISL_1109039, EPI_ISL_1109040, EPI_ISL_1109041                                                                                                                                                                                                                                                                                                                                                                                                                                                                                                                                                                                                                                                                                                                                                                                                                                                                                                                                                                                                                                                                                                                                                                                                                                                                                                                                                                                                                                                                                                                                                                                                                                                                                                                                                                                                                                                                                                                                                                                                                                                                                                                                                                                                                                                                                                                                                                                                                                                                                                                                                                                                    | see above                                                                                                                                                                        | COVID-19 Genomics UK (COG-UK) Consortium                                   | Gemma Clark, Wendy Smith, Manjinder Khakh, Vicki M Fleming, Michelle M Lister, Hannah Howson-Wells, Jonathan Ball, Patrick McClure, Joseph Chappell, Theocharis Tsoleridis, Nadine Holmes, Matthew Carlisle, Christopher Moore, Fei Sang, Johnny Debebe, Victoria Wright, Matthew Loose                                                                                                                                                                                                                                                                                                                                                                                                                  |
| EPI_ISL_1177707, EPI_ISL_1177708, EPI_ISL_1177729, EPI_ISL_1177731, EPI_ISL_1177733                                                                                                                                                                                                                                                                                                                                                                                                                                                                                                                                                                                                                                                                                                                                                                                                                                                                                                                                                                                                                                                                                                                                                                                                                                                                                                                                                                                                                                                                                                                                                                                                                                                                                                                                                                                                                                                                                                                                                                                                                                                                                                                                                                                                                                                                                                                                                                                                                                                                                                                                                                                                                                                                                                                                                             | Virology Department, Royal Infirmary of Edinburgh, NHS Lothian / School of Biological Sciences, University of Edinburgh                                                          | COVID-19 Genomics UK (COG-UK) Consortium                                   | McHugh M, Dewar R, Cotton S, Rooke S, O'Toole Á, Scher E, Hill V, McCrone JT, Colquhoun R, Yu X, Jackson B, Rambaut A, Templeton K                                                                                                                                                                                                                                                                                                                                                                                                                                                                                                                                                                       |
| EPI_ISL_1177890                                                                                                                                                                                                                                                                                                                                                                                                                                                                                                                                                                                                                                                                                                                                                                                                                                                                                                                                                                                                                                                                                                                                                                                                                                                                                                                                                                                                                                                                                                                                                                                                                                                                                                                                                                                                                                                                                                                                                                                                                                                                                                                                                                                                                                                                                                                                                                                                                                                                                                                                                                                                                                                                                                                                                                                                                                 | Liverpool Clinical Laboratories                                                                                                                                                  | COVID-19 Genomics UK (COG-UK) Consortium                                   | Sam Haldenby, Alistair Darby, Steve Paterson, Anita Lucaci, Julian Hiscox, M Almsaud, A Alrezaihi, Muhannad Alruwaili, Stuart D Armstrong, Jones Benjamin, Eleanor G Bentley, Anu Chawla, Jordan J Clark, Angela Cowell, Richard Eccles, Isabel Garcia-Dorival, Matthew Gemmell, Alessandro Gerada, PKF Gilmore, Richard Gregory, Ximeng Han, Catherine Hartley, Margaret Hughes, Miren Ituriza-Gomara, James Johnson, L Luu, Jenifer Manson, Charlotte Nelson, Elaine O'Toole, Cassie Olateju, Rebekah Penrice-Randal, Lucille Rainbow, N.P Randle, Trevor Ian Robinson, Parul Sharma, Ghada T Shawli, James P Stewart, Neil Swainston, Ecaterina Vamos, Joanne Watts, Mark Whitehead, Hermione Webster |
| EPI_ISL_1178143, EPI_ISL_1178144, EPI_ISL_1178145, EPI_ISL_1178146, EPI_ISL_1178147, EPI_ISL_1178193, EPI_ISL_1178194, EPI_ISL_1178195, EPI_ISL_1178196, EPI_ISL_1178197, EPI_ISL_1178198, EPI_ISL_1178199, EPI_ISL_1178200, EPI_ISL_1178201, EPI_ISL_1178202, EPI_ISL_1178203, EPI_ISL_1178204, EPI_ISL_1178205, EPI_ISL_1178207, EPI_ISL_1178208, EPI_ISL_1178209, EPI_ISL_1178210, EPI_ISL_1178211, EPI_ISL_1178212, EPI_ISL_1178213, EPI_ISL_1178214, EPI_ISL_1178215, EPI_ISL_1178216, EPI_ISL_1178217, EPI_ISL_1178218, EPI_ISL_1178219, EPI_ISL_1178220, EPI_ISL_1178221, EPI_ISL_1178222                                                                                                                                                                                                                                                                                                                                                                                                                                                                                                                                                                                                                                                                                                                                                                                                                                                                                                                                                                                                                                                                                                                                                                                                                                                                                                                                                                                                                                                                                                                                                                                                                                                                                                                                                                                                                                                                                                                                                                                                                                                                                                                                                                                                                                                | see above                                                                                                                                                                        | COVID-19 Genomics UK (COG-UK) Consortium                                   | Darren L Smith, Andrew Nelson, Matthew Bashton, Greg R Young, Joshua Loh, John Allan, Mohammad A Tariq, Giles S Holt, Gary Black, Wen C Yew, Lynn Dover, Paul Baker, Steve Liggett, Sarah Essex, Jane Greenaway, Debra Padgett, Clive Graham, Garren Scott, Edward Barton, Emma Swindells, Brendan Payne, Jennifer Collins, Yusra Taha, Gary Eltringham                                                                                                                                                                                                                                                                                                                                                  |
| EPI_ISL_1178435, EPI_ISL_1178438, EPI_ISL_1178439, EPI_ISL_1178441, EPI_ISL_1178445, EPI_ISL_1178447, EPI_ISL_1178449, EPI_ISL_1178452, EPI_ISL_1178453, EPI_ISL_1178455, EPI_ISL_1178457, EPI_ISL_1178459, EPI_ISL_1178463, EPI_ISL_1178472, EPI_ISL_1178474, EPI_ISL_1178477, EPI_ISL_1178478, EPI_ISL_1178480, EPI_ISL_1178482, EPI_ISL_1178483, EPI_ISL_1178487, EPI_ISL_1178493, EPI_ISL_1178495, EPI_ISL_1178507                                                                                                                                                                                                                                                                                                                                                                                                                                                                                                                                                                                                                                                                                                                                                                                                                                                                                                                                                                                                                                                                                                                                                                                                                                                                                                                                                                                                                                                                                                                                                                                                                                                                                                                                                                                                                                                                                                                                                                                                                                                                                                                                                                                                                                                                                                                                                                                                                          | see above                                                                                                                                                                        | COVID-19 Genomics UK (COG-UK) Consortium                                   | Dave J. Baker, Gemma L. Kay, Alp Aydin, Thanh Le-Viet, Steven Rudder, Ana P. Tedim, Anastasia Kolyva, Maria Diaz, Leonardo de Oliveira Martins, Nabil-Fareed Alikhan, Lizzie Meadows, Rachael Stanley, Ngozi Elumogo, Muhammed Yahir, Nicholas M. Thomson, Alexander J Trotter, Rachel Gilroy, Samuel Bloomfield, Claire Stuart, Andrew Bell, Reenesh Prakash, Samir Dervisevic, Alison E. Mather, John Wain, Mark Webber, Andrew J. Page, Justin O'Grady                                                                                                                                                                                                                                                |
| EPI_ISL_1178826                                                                                                                                                                                                                                                                                                                                                                                                                                                                                                                                                                                                                                                                                                                                                                                                                                                                                                                                                                                                                                                                                                                                                                                                                                                                                                                                                                                                                                                                                                                                                                                                                                                                                                                                                                                                                                                                                                                                                                                                                                                                                                                                                                                                                                                                                                                                                                                                                                                                                                                                                                                                                                                                                                                                                                                                                                 | Oxford Viromics, NDM, University of Oxford; Oxford University Hospitals; Basingstoke and North Hampshire Hospital                                                                | COVID-19 Genomics UK (COG-UK) Consortium                                   | Tanya Golubchik, David Bonsall, George Macintyre, Amy Trebes, Mariateresa de Cesare, Catrin Moore, Alex Mobbs, Anita Justice, Robert Shaw, Monique Andersson, Timothy Peto, Emma Wise, Nathan Moore, Jessica Lynch, Nick Cortes, Matilde Mori, Stephen Kidd, David Buck, John Todd, Christophe Fraser                                                                                                                                                                                                                                                                                                                                                                                                    |
| EPI_ISL_1179155                                                                                                                                                                                                                                                                                                                                                                                                                                                                                                                                                                                                                                                                                                                                                                                                                                                                                                                                                                                                                                                                                                                                                                                                                                                                                                                                                                                                                                                                                                                                                                                                                                                                                                                                                                                                                                                                                                                                                                                                                                                                                                                                                                                                                                                                                                                                                                                                                                                                                                                                                                                                                                                                                                                                                                                                                                 | Originating lab: Wales Specialist Virology Centre Sequencing lab: Pathogen Genomics Unit                                                                                         | Public Health Wales Microbiology Cardiff Wales Specialist Virology Centre  | Catherine Moore, Johnathan Evans, Laura Gifford, Malorie Perry, Simon Cottrell, Angela Marchbank, Alec Birchley, Alexander Adams, Amy Gaskin, Bree Gatica-Wilcox, Jason Coombes, Joel Southgate, Lauren Gilbert, Lee Graham, Nicole Pacchiarini, Sara Kumziene-Summerhayes, Sarah Taylor, Sophie Jones, Sara Rey, Matthew Bull, Joanne Watkins, Sally Corden, Tom Connor                                                                                                                                                                                                                                                                                                                                 |
| EPI_ISL_1179831, EPI_ISL_1179833                                                                                                                                                                                                                                                                                                                                                                                                                                                                                                                                                                                                                                                                                                                                                                                                                                                                                                                                                                                                                                                                                                                                                                                                                                                                                                                                                                                                                                                                                                                                                                                                                                                                                                                                                                                                                                                                                                                                                                                                                                                                                                                                                                                                                                                                                                                                                                                                                                                                                                                                                                                                                                                                                                                                                                                                                | Centre for Enzyme Innovation, University of Portsmouth / Translational Research Laboratory, Portsmouth Hospitals NHS Trust                                                       | COVID-19 Genomics UK (COG-UK) Consortium                                   | Angela Beckett, Salman Goudarzi, Christopher Fearn, Kate Cook, Katie Loveson, Sharon Glaysher, Scott Elliott, Samuel Robson                                                                                                                                                                                                                                                                                                                                                                                                                                                                                                                                                                              |
| EPI_ISL_1179911, EPI_ISL_1179933, EPI_ISL_1179935, EPI_ISL_1179936, EPI_ISL_1179951, EPI_ISL_1179952, EPI_ISL_1179953, EPI_ISL_1179954, EPI_ISL_1179955, EPI_ISL_1179956, EPI_ISL_1179957, EPI_ISL_1179958, EPI_ISL_1179959, EPI_ISL_1179977, EPI_ISL_1179978, EPI_ISL_1179983, EPI_ISL_1179990, EPI_ISL_1179991, EPI_ISL_1179992, EPI_ISL_1179993, EPI_ISL_1179994, EPI_ISL_1179995, EPI_ISL_1179996, EPI_ISL_1180017, EPI_ISL_1180023, EPI_ISL_1180024, EPI_ISL_1180025, EPI_ISL_1180026, EPI_ISL_1180027, EPI_ISL_1180028                                                                                                                                                                                                                                                                                                                                                                                                                                                                                                                                                                                                                                                                                                                                                                                                                                                                                                                                                                                                                                                                                                                                                                                                                                                                                                                                                                                                                                                                                                                                                                                                                                                                                                                                                                                                                                                                                                                                                                                                                                                                                                                                                                                                                                                                                                                    | see above                                                                                                                                                                        | COVID-19 Genomics UK (COG-UK) Consortium                                   | Aminu S. Jahun, Yasmin Chaudhry, Iliana Georgana, Myra Hosmillo, Rhys Izuagbe, William L. Hamilton, Martin D. Curran, Surendra Parmar, Ian Goodfellow                                                                                                                                                                                                                                                                                                                                                                                                                                                                                                                                                    |
| EPI_ISL_1180083, EPI_ISL_1180087                                                                                                                                                                                                                                                                                                                                                                                                                                                                                                                                                                                                                                                                                                                                                                                                                                                                                                                                                                                                                                                                                                                                                                                                                                                                                                                                                                                                                                                                                                                                                                                                                                                                                                                                                                                                                                                                                                                                                                                                                                                                                                                                                                                                                                                                                                                                                                                                                                                                                                                                                                                                                                                                                                                                                                                                                | Virology Department, Sheffield Teaching Hospitals NHS Foundation Trust/Department of Infection, Immunity and Cardiovascular Disease, The Medical School, University of Sheffield | COVID-19 Genomics UK (COG-UK) Consortium                                   | Thushan de Silva, Matthew Parker, Nikki Smith, Adri Angyal, Rebecca Brown, Luke Green, Rachel Tucker, Paul Parsons, Danielle Groves, Katie Johnson, Laura Carrilero, Alex Keeley, Dave Partridge, Matthew Wyles, Benjamin Lindsey, Mehmet Yavuz, Mohammad Raza, Cariad Evans                                                                                                                                                                                                                                                                                                                                                                                                                             |
| EPI_ISL_1187053, EPI_ISL_1187064, EPI_ISL_1187068, EPI_ISL_1187069, EPI_ISL_1187073, EPI_ISL_1187103, EPI_ISL_1187113, EPI_ISL_1187114, EPI_ISL_1187130, EPI_ISL_1187136, EPI_ISL_1187140, EPI_ISL_1187146, EPI_ISL_1187165, EPI_ISL_1187171, EPI_ISL_1187176, EPI_ISL_1187177, EPI_ISL_1187192, EPI_ISL_1187193, EPI_ISL_1187204, EPI_ISL_1187218, EPI_ISL_1187219, EPI_ISL_1187221, EPI_ISL_1187225, EPI_ISL_1187226, EPI_ISL_1187237, EPI_ISL_1187240, EPI_ISL_1187245, EPI_ISL_1187253, EPI_ISL_1206041, EPI_ISL_1206042, EPI_ISL_1206043, EPI_ISL_1206044, EPI_ISL_1206046, EPI_ISL_1206048, EPI_ISL_1206049, EPI_ISL_1206052, EPI_ISL_1206053, EPI_ISL_1206055, EPI_ISL_1206057, EPI_ISL_1206059, EPI_ISL_1206060, EPI_ISL_1206061, EPI_ISL_1206062, EPI_ISL_1206063, EPI_ISL_1206064, EPI_ISL_1206069, EPI_ISL_1206070, EPI_ISL_1206071, EPI_ISL_1206072, EPI_ISL_1206074, EPI_ISL_1206083, EPI_ISL_1206085, EPI_ISL_1206086, EPI_ISL_1206088, EPI_ISL_1206089, EPI_ISL_1206094, EPI_ISL_1206095, EPI_ISL_1206098, EPI_ISL_1206099, EPI_ISL_1206101, EPI_ISL_1206102, EPI_ISL_1206103, EPI_ISL_1206105, EPI_ISL_1206106, EPI_ISL_1206107, EPI_ISL_1206116, EPI_ISL_1206119, EPI_ISL_1206120, EPI_ISL_1206121, EPI_ISL_1206122, EPI_ISL_1206126, EPI_ISL_1206129, EPI_ISL_1206131, EPI_ISL_1206135, EPI_ISL_1206138, EPI_ISL_1206140, EPI_ISL_1206141, EPI_ISL_1206142, EPI_ISL_1206144, EPI_ISL_1206146, EPI_ISL_1206147, EPI_ISL_1206149, EPI_ISL_1206154, EPI_ISL_1206155, EPI_ISL_1206158, EPI_ISL_1206160, EPI_ISL_1206162, EPI_ISL_1206163, EPI_ISL_1206165, EPI_ISL_1206168, EPI_ISL_1206172, EPI_ISL_1206173, EPI_ISL_1206178, EPI_ISL_1206180, EPI_ISL_1206183, EPI_ISL_1206186, EPI_ISL_1206187, EPI_ISL_1206191, EPI_ISL_1206192, EPI_ISL_1206196, EPI_ISL_1206198, EPI_ISL_1206200, EPI_ISL_1206203, EPI_ISL_1206207, EPI_ISL_1206213, EPI_ISL_1206217, EPI_ISL_1206221, EPI_ISL_1206222, EPI_ISL_1206226, EPI_ISL_1206230, EPI_ISL_1206233, EPI_ISL_1206237, EPI_ISL_1206244, EPI_ISL_1206245, EPI_ISL_1206248, EPI_ISL_1206251, EPI_ISL_1206258, EPI_ISL_1206262, EPI_ISL_1206263, EPI_ISL_1206266, EPI_ISL_1206268, EPI_ISL_1206272, EPI_ISL_1206275, EPI_ISL_1206279, EPI_ISL_1206280, EPI_ISL_1206284, EPI_ISL_1206291, EPI_ISL_1223161, EPI_ISL_1223164, EPI_ISL_1223174, EPI_ISL_1223224, EPI_ISL_1223240, EPI_ISL_1223245, EPI_ISL_1223288, EPI_ISL_1223291, EPI_ISL_1223383, EPI_ISL_1223391, EPI_ISL_1223392, EPI_ISL_1223401, EPI_ISL_1223404, EPI_ISL_1223411, EPI_ISL_1223424, EPI_ISL_1223426, EPI_ISL_1223435, EPI_ISL_1242052, EPI_ISL_1242057, EPI_ISL_1242066, EPI_ISL_1242096, EPI_ISL_1242124, EPI_ISL_1242132, EPI_ISL_1242136, EPI_ISL_1242145, EPI_ISL_1242149, EPI_ISL_1242162, EPI_ISL_1242179, EPI_ISL_1242187, EPI_ISL_1242188, EPI_ISL_1242211, EPI_ISL_1242225, EPI_ISL_1242227, EPI_ISL_1242280 | see above                                                                                                                                                                        | Wellcome Sanger Institute for the COVID-19 Genomics UK (COG-UK) Consortium | Rob Howes, The Lighthouse Lab in Cambridge and Alex Alderton, Roberto Amato, Jeffrey Barrett, Sonia Goncalves, Ewan Harrison, David K. Jackson, Ian Johnston, Dominic Kwiatkowski, Cordelia Langford, John Sillitoe on behalf of the Wellcome Sanger Institute COVID-19 Surveillance Team                                                                                                                                                                                                                                                                                                                                                                                                                |
| EPI_ISL_1247689, EPI_ISL_1247690, EPI_ISL_1247693, EPI_ISL_1247729                                                                                                                                                                                                                                                                                                                                                                                                                                                                                                                                                                                                                                                                                                                                                                                                                                                                                                                                                                                                                                                                                                                                                                                                                                                                                                                                                                                                                                                                                                                                                                                                                                                                                                                                                                                                                                                                                                                                                                                                                                                                                                                                                                                                                                                                                                                                                                                                                                                                                                                                                                                                                                                                                                                                                                              | Virology Department, Royal Infirmary of Edinburgh, NHS Lothian / School of Biological Sciences, University of Edinburgh                                                          | COVID-19 Genomics UK (COG-UK) Consortium                                   | McHugh M, Dewar R, Cotton S, Rooke S, O'Toole Á, Scher E, Hill V, McCrone JT, Colquhoun R, Yu X, Jackson B, Rambaut A, Templeton K                                                                                                                                                                                                                                                                                                                                                                                                                                                                                                                                                                       |
| EPI_ISL_1247819, EPI_ISL_1247820, EPI_ISL_1247821, EPI_ISL_1247822                                                                                                                                                                                                                                                                                                                                                                                                                                                                                                                                                                                                                                                                                                                                                                                                                                                                                                                                                                                                                                                                                                                                                                                                                                                                                                                                                                                                                                                                                                                                                                                                                                                                                                                                                                                                                                                                                                                                                                                                                                                                                                                                                                                                                                                                                                                                                                                                                                                                                                                                                                                                                                                                                                                                                                              | Liverpool Clinical Laboratories                                                                                                                                                  | COVID-19 Genomics UK (COG-UK) Consortium                                   | Sam Haldenby, Alistair Darby, Steve Paterson, Anita Lucaci, Julian Hiscox, M Almsaud, A Alrezaihi, Muhannad Alruwaili, Stuart D Armstrong, Jones Benjamin, Eleanor G Bentley, Anu Chawla, Jordan J Clark, Angela Cowell, Richard Eccles, Isabel Garcia-Dorival, Matthew Gemmell, Alessandro Gerada, PKF Gilmore, Richard Gregory, Ximeng Han, Catherine Hartley, Margaret Hughes, Miren Ituriza-Gomara, James Johnson, L Luu, Jenifer Manson, Charlotte Nelson, Elaine O'Toole, Cassie Olateju, Rebekah Penrice-Randal, Lucille Rainbow, N.P Randle, Trevor Ian Robinson, Parul Sharma, Ghada T Shawli, James P Stewart, Neil Swainston, Ecaterina Vamos, Joanne Watts, Mark Whitehead, Hermione Webster |
| EPI_ISL_1248167, EPI_ISL_1248188, EPI_ISL_1248207, EPI_ISL_1248208, EPI_ISL_1248209, EPI_ISL_1248210, EPI_ISL_1248211, EPI_ISL_1248212, EPI_ISL_1248213                                                                                                                                                                                                                                                                                                                                                                                                                                                                                                                                                                                                                                                                                                                                                                                                                                                                                                                                                                                                                                                                                                                                                                                                                                                                                                                                                                                                                                                                                                                                                                                                                                                                                                                                                                                                                                                                                                                                                                                                                                                                                                                                                                                                                                                                                                                                                                                                                                                                                                                                                                                                                                                                                         | University College London, Great Ormond Street Hospital for Children NHS Foundation Trust, Imperial College Healthcare NHS Trust                                                 | COVID-19 Genomics UK (COG-UK) Consortium                                   | Sergi Castellano, Rachel Williams, Mark Kristiansen, Paola Resende Silva, Sunando Roy, Tony Brooks, Helena Tutill, Paola Niola, Patricia Dyal, Charlotte Williams, Leysa Forrest, Yasmin Panchbhaya, Jacqueline Findlay, Samuel Weeks, Julianne Brown, Kathryn Harris, Paul Randell, James Price, Alison Holmes, Judith Breuer                                                                                                                                                                                                                                                                                                                                                                           |

|                                                                                                                                                                                                                                                                                                                                                                                                                                                                                                                                                                                                                                                                |                                                                                                                                                                                                 |                                                                                                                         |                                                                            |                                                                                                                                                                                                                                                                                                                                                                                                                                                                                                                                                                                                                                                                                                           |
|----------------------------------------------------------------------------------------------------------------------------------------------------------------------------------------------------------------------------------------------------------------------------------------------------------------------------------------------------------------------------------------------------------------------------------------------------------------------------------------------------------------------------------------------------------------------------------------------------------------------------------------------------------------|-------------------------------------------------------------------------------------------------------------------------------------------------------------------------------------------------|-------------------------------------------------------------------------------------------------------------------------|----------------------------------------------------------------------------|-----------------------------------------------------------------------------------------------------------------------------------------------------------------------------------------------------------------------------------------------------------------------------------------------------------------------------------------------------------------------------------------------------------------------------------------------------------------------------------------------------------------------------------------------------------------------------------------------------------------------------------------------------------------------------------------------------------|
| EPI_ISL_1248939, EPI_ISL_1248940, EPI_ISL_1248941, EPI_ISL_1248942, EPI_ISL_1248943, EPI_ISL_1248944, EPI_ISL_1248946, EPI_ISL_1248948, EPI_ISL_1248952, EPI_ISL_1248954, EPI_ISL_1248957, EPI_ISL_1248960, EPI_ISL_1248974, EPI_ISL_1249038, EPI_ISL_1249039, EPI_ISL_1249042                                                                                                                                                                                                                                                                                                                                                                                 | see above                                                                                                                                                                                       | Quadram Institute Bioscience                                                                                            | COVID-19 Genomics UK (COG-UK) Consortium                                   | Dave J. Baker, Gemma L. Kay, Alp Aydin, Thanh Le-Viet, Steven Rudder, Ana P. Tedim, Anastasia Kolyva, Maria Diaz, Leonardo de Oliveira Martins, Nabil-Fareed Alikhan, Lizzie Meadows, Rachael Stanley, Ngozi Elumogo, Muhammed Yasir, Nicholas M. Thomson, Alexander J Trotter, Rachel Gilroy, Samuel Bloomfield, Claire Stuart, Andrew Bell, Reenesh Prakash, Samir Dervisevic, Alison E. Mather, John Wain, Mark Webber, Andrew J. Page, Justin O'Grady                                                                                                                                                                                                                                                 |
| EPI_ISL_1249220, EPI_ISL_1249221, EPI_ISL_1249222, EPI_ISL_1249223                                                                                                                                                                                                                                                                                                                                                                                                                                                                                                                                                                                             | Oxford Viromics, NDM, University of Oxford; Oxford University Hospitals; Basingstoke and North Hampshire Hospital                                                                               | Respiratory Virus Unit, National Infection Service, Public Health England                                               | COVID-19 Genomics UK (COG-UK) Consortium                                   | Tanya Golubchik, David Bonsall, George Macintyre, Amy Trebes, Mariateresa de Cesare, Catrin Moore, Alex Mobbs, Anita Justice, Robert Shaw, Monique Andersson, Timothy Peto, Emma Wise, Nathan Moore, Jessica Lynch, Nick Cortes, Matilde Mori, Stephen Kidd, David Buck, John Todd, Christophe Fraser                                                                                                                                                                                                                                                                                                                                                                                                     |
| EPI_ISL_1296578, EPI_ISL_1296581, EPI_ISL_1296582, EPI_ISL_1296585, EPI_ISL_1296586, EPI_ISL_1296588                                                                                                                                                                                                                                                                                                                                                                                                                                                                                                                                                           |                                                                                                                                                                                                 |                                                                                                                         | COVID-19 Genomics UK (COG-UK) Consortium                                   |                                                                                                                                                                                                                                                                                                                                                                                                                                                                                                                                                                                                                                                                                                           |
| EPI_ISL_1308546, EPI_ISL_1308557, EPI_ISL_1308558, EPI_ISL_1308560, EPI_ISL_1308571, EPI_ISL_1308575, EPI_ISL_1308576, EPI_ISL_1308577, EPI_ISL_1308639                                                                                                                                                                                                                                                                                                                                                                                                                                                                                                        |                                                                                                                                                                                                 | University of Exeter                                                                                                    | COVID-19 Genomics UK (COG-UK) Consortium                                   |                                                                                                                                                                                                                                                                                                                                                                                                                                                                                                                                                                                                                                                                                                           |
| EPI_ISL_1308819, EPI_ISL_1308820, EPI_ISL_1308824, EPI_ISL_1308850, EPI_ISL_1308854, EPI_ISL_1308855                                                                                                                                                                                                                                                                                                                                                                                                                                                                                                                                                           |                                                                                                                                                                                                 | Virology Department, Royal Infirmary of Edinburgh, NHS Lothian / School of Biological Sciences, University of Edinburgh | COVID-19 Genomics UK (COG-UK) Consortium                                   |                                                                                                                                                                                                                                                                                                                                                                                                                                                                                                                                                                                                                                                                                                           |
| EPI_ISL_1309055, EPI_ISL_1309063, EPI_ISL_1309066, EPI_ISL_1309110                                                                                                                                                                                                                                                                                                                                                                                                                                                                                                                                                                                             | University College London, Great Ormond Street Hospital for Children NHS Foundation Trust, Imperial College Healthcare NHS Trust                                                                |                                                                                                                         | COVID-19 Genomics UK (COG-UK) Consortium                                   | Sergi Castellano, Rachel Williams, Mark Kristiansen, Paola Resende Silva, Sunando Roy, Tony Brooks, Helena Tutill, Paola Niola, Patricia Dyal, Charlotte Williams, Leysa Forrest, Yasmin Panchbhaya, Jacqueline Findlay, Samuel Weeks, Julianne Brown, Kathryn Harris, Paul Randell, James Price, Alison Holmes, Judith Breuer                                                                                                                                                                                                                                                                                                                                                                            |
| EPI_ISL_1309668, EPI_ISL_1309669, EPI_ISL_1309673                                                                                                                                                                                                                                                                                                                                                                                                                                                                                                                                                                                                              | Quadram Institute Bioscience                                                                                                                                                                    |                                                                                                                         | COVID-19 Genomics UK (COG-UK) Consortium                                   | Dave J. Baker, Gemma L. Kay, Alp Aydin, Thanh Le-Viet, Steven Rudder, Ana P. Tedim, Anastasia Kolyva, Maria Diaz, Leonardo de Oliveira Martins, Nabil-Fareed Alikhan, Lizzie Meadows, Rachael Stanley, Ngozi Elumogo, Muhammed Yasir, Nicholas M. Thomson, Alexander J Trotter, Rachel Gilroy, Samuel Bloomfield, Claire Stuart, Andrew Bell, Reenesh Prakash, Samir Dervisevic, Alison E. Mather, John Wain, Mark Webber, Andrew J. Page, Justin O'Grady                                                                                                                                                                                                                                                 |
| EPI_ISL_1310349                                                                                                                                                                                                                                                                                                                                                                                                                                                                                                                                                                                                                                                | Centre for Enzyme Innovation, University of Portsmouth / Translational Research Laboratory, Portsmouth Hospitals NHS Trust                                                                      |                                                                                                                         | COVID-19 Genomics UK (COG-UK) Consortium                                   | Angela Beckett, Salman Goudarzi, Christopher Fearn, Kate Cook, Katie Loveson, Sharon Glaysheer, Scott Elliott, Samuel Robson                                                                                                                                                                                                                                                                                                                                                                                                                                                                                                                                                                              |
| EPI_ISL_1333481, EPI_ISL_1333488, EPI_ISL_1333490, EPI_ISL_1333491, EPI_ISL_1333492, EPI_ISL_1333500, EPI_ISL_1333502, EPI_ISL_1333504, EPI_ISL_1333505, EPI_ISL_1333507, EPI_ISL_1333508, EPI_ISL_1333834, EPI_ISL_1333835, EPI_ISL_1333836, EPI_ISL_1333839, EPI_ISL_1333935, EPI_ISL_1333941                                                                                                                                                                                                                                                                                                                                                                | see above                                                                                                                                                                                       | Lighthouse Lab in Cambridge                                                                                             | Wellcome Sanger Institute for the COVID-19 Genomics UK (COG-UK) Consortium | Rob Howes, The Lighthouse Lab in Cambridge and Alex Alderton, Roberto Amato, Jeffrey Barrett, Sonia Goncalves, Ewan Harrison, David K. Jackson, Ian Johnston, Dominic Kwiatkowski, Cordelia Langford, John Sillitoe on behalf of the Wellcome Sanger Institute COVID-19 Surveillance Team                                                                                                                                                                                                                                                                                                                                                                                                                 |
| EPI_ISL_1386883                                                                                                                                                                                                                                                                                                                                                                                                                                                                                                                                                                                                                                                | University College London, Great Ormond Street Hospital for Children NHS Foundation Trust, Imperial College Healthcare NHS Trust                                                                |                                                                                                                         | COVID-19 Genomics UK (COG-UK) Consortium                                   | Sergi Castellano, Rachel Williams, Mark Kristiansen, Paola Resende Silva, Sunando Roy, Tony Brooks, Helena Tutill, Paola Niola, Patricia Dyal, Charlotte Williams, Leysa Forrest, Yasmin Panchbhaya, Jacqueline Findlay, Samuel Weeks, Julianne Brown, Kathryn Harris, Paul Randell, James Price, Alison Holmes, Judith Breuer                                                                                                                                                                                                                                                                                                                                                                            |
| EPI_ISL_1387166                                                                                                                                                                                                                                                                                                                                                                                                                                                                                                                                                                                                                                                | Queens Medical Centre, Clinical Microbiology Department / DeepSeq Nottingham                                                                                                                    |                                                                                                                         | COVID-19 Genomics UK (COG-UK) Consortium                                   | Gemma Clark, Wendy Smith, Manjinder Khakh, Vicki M Fleming, Michelle M Lister, Hannah Howson-Wells, Jonathan Ball, Timothy Byaruhanga, Jayasree Dey, Emily Park, Jack Hill, Patrick McClure, Joseph Chappell, Theocharis Tsoleridis, Nadine Holmes, Matthew Carlisle, Christopher Moore, Fei Sang, Johnny Debebe, Victoria Wright, Matthew Loose                                                                                                                                                                                                                                                                                                                                                          |
| EPI_ISL_1387219                                                                                                                                                                                                                                                                                                                                                                                                                                                                                                                                                                                                                                                | Oxford Viromics, NDM, University of Oxford; Oxford University Hospitals; Basingstoke and North Hampshire Hospital                                                                               |                                                                                                                         | COVID-19 Genomics UK (COG-UK) Consortium                                   | Tanya Golubchik, David Bonsall, George Macintyre, Amy Trebes, Mariateresa de Cesare, Catrin Moore, Alex Mobbs, Anita Justice, Robert Shaw, Monique Andersson, Timothy Peto, Emma Wise, Nathan Moore, Jessica Lynch, Nick Cortes, Matilde Mori, Stephen Kidd, David Buck, John Todd, Christophe Fraser                                                                                                                                                                                                                                                                                                                                                                                                     |
| EPI_ISL_1391414                                                                                                                                                                                                                                                                                                                                                                                                                                                                                                                                                                                                                                                | Barts Health NHS Trust                                                                                                                                                                          |                                                                                                                         | Barts Health NHS Trust                                                     | KARAA, Esin; CUTINO-MOGUEL, Maria-Teresa; HARRINGTON, David; OWOYEMI, Dola; KULASEGARAN-SHYLINI, Raghavendran; BROAD, Claire; KELE, Beatrix                                                                                                                                                                                                                                                                                                                                                                                                                                                                                                                                                               |
| EPI_ISL_1474666                                                                                                                                                                                                                                                                                                                                                                                                                                                                                                                                                                                                                                                | Liverpool Clinical Laboratories                                                                                                                                                                 |                                                                                                                         | COVID-19 Genomics UK (COG-UK) Consortium                                   | Sam Haldenby, Alistair Darby, Steve Paterson, Anita Lucaci, Julian Hiscox, M Almsaud, A Alrezaihi, Muhannad Alruwaili, Stuart D Armstrong, Jones Benjamin, Eleanor G Bentley, Anu Chawla, Jordan J Clark, Angela Cowell, Richard Eccles, Isabel Garcia-Dorival, Matthew Gemmell, Alessandro Gerada, PKF Gilmore, Richard Gregory, Ximeng Han, Catherine Hartley, Margaret Hughes, Miren Iturriza-Gomara, James Johnson, L Luu, Jenifer Manson, Charlotte Nelson, Elaine O'Toole, Cassie Olateju, Rebekah Penrice-Randal, Lucille Rainbow, N.P Randle, Trevor Ian Robinson, Parul Sharma, Ghada T Shawli, James P Stewart, Neil Swainston, Ecaterina Vamos, Joanne Watts, Mark Whitehead, Hermione Webster |
| EPI_ISL_1474838                                                                                                                                                                                                                                                                                                                                                                                                                                                                                                                                                                                                                                                | University College London, Great Ormond Street Hospital for Children NHS Foundation Trust, Imperial College Healthcare NHS Trust                                                                |                                                                                                                         | COVID-19 Genomics UK (COG-UK) Consortium                                   | Sergi Castellano, Rachel Williams, Mark Kristiansen, Paola Resende Silva, Sunando Roy, Tony Brooks, Helena Tutill, Paola Niola, Patricia Dyal, Charlotte Williams, Leysa Forrest, Yasmin Panchbhaya, Jacqueline Findlay, Samuel Weeks, Julianne Brown, Kathryn Harris, Paul Randell, James Price, Alison Holmes, Judith Breuer                                                                                                                                                                                                                                                                                                                                                                            |
| EPI_ISL_1475010, EPI_ISL_1475011, EPI_ISL_1475012, EPI_ISL_1475013, EPI_ISL_1475014, EPI_ISL_1475015, EPI_ISL_1475016, EPI_ISL_1475040, EPI_ISL_1475042, EPI_ISL_1475045, EPI_ISL_1475046, EPI_ISL_1475049, EPI_ISL_1475050, EPI_ISL_1475057, EPI_ISL_1475058, EPI_ISL_1475059, EPI_ISL_1475060, EPI_ISL_1475119, EPI_ISL_1475120, EPI_ISL_1475124, EPI_ISL_1475125, EPI_ISL_1475127, EPI_ISL_1475131                                                                                                                                                                                                                                                          | see above                                                                                                                                                                                       | Regional Virus Laboratory, Belfast Health and Social Care Trust                                                         | COVID-19 Genomics UK (COG-UK) Consortium                                   | Conall McCaughey, James McKenna, Tanya Curran, Susan Feeney, Alison Watt, Ciara Cox, Mairead Connor, Zoltan Molnar, David Simpson, Derek Fairley                                                                                                                                                                                                                                                                                                                                                                                                                                                                                                                                                          |
| EPI_ISL_1476455, EPI_ISL_1476484, EPI_ISL_1476486, EPI_ISL_1476488, EPI_ISL_1476499                                                                                                                                                                                                                                                                                                                                                                                                                                                                                                                                                                            | Originating lab: Wales Specialist Virology Centre Sequencing lab: Pathogen Genomics Unit                                                                                                        |                                                                                                                         | Public Health Wales Microbiology Cardiff Wales Specialist Virology Centre  | Catherine Moore, Johnathan Evans, Laura Gifford, Malorie Perry, Simon Cottrell, Angela Marchbank, Alec Birchley, Alexander Adams, Amy Gaskin, Bree Gatica-Wilcox, Jason Coombes, Joel Southgate, Lauren Gilbert, Lee Graham, Nicole Pacchiari, Sara Kumziene-Summerhayes, Sarah Taylor, Sophie Jones, Sara Rey, Matthew Bull, Joanne Watkins, Sally Corden, Tom Connor                                                                                                                                                                                                                                                                                                                                    |
| EPI_ISL_919149, EPI_ISL_919150, EPI_ISL_919151, EPI_ISL_919152, EPI_ISL_919153, EPI_ISL_919154, EPI_ISL_919155, EPI_ISL_919156, EPI_ISL_919157, EPI_ISL_919158, EPI_ISL_919159, EPI_ISL_919160, EPI_ISL_919161, EPI_ISL_919162, EPI_ISL_919163, EPI_ISL_919164, EPI_ISL_919165, EPI_ISL_919166, EPI_ISL_919167, EPI_ISL_919168, EPI_ISL_919169, EPI_ISL_919170, EPI_ISL_919171, EPI_ISL_919172, EPI_ISL_919173, EPI_ISL_919174, EPI_ISL_919175, EPI_ISL_919176, EPI_ISL_919177, EPI_ISL_919179, EPI_ISL_919180, EPI_ISL_919181, EPI_ISL_919182, EPI_ISL_919183, EPI_ISL_919184, EPI_ISL_919185, EPI_ISL_919186, EPI_ISL_919187, EPI_ISL_919188, EPI_ISL_919189 | see above                                                                                                                                                                                       | Department of Pathology, University of Cambridge                                                                        | COVID-19 Genomics UK (COG-UK) Consortium                                   | Aminu S. Jahun, Yasmin Chaudhry, Iliana Georgana, Myra Hosmillo, Rhys Izu, Martin D. Curran, Surendra Parmar, Ian Goodfellow                                                                                                                                                                                                                                                                                                                                                                                                                                                                                                                                                                              |
| EPI_ISL_919405                                                                                                                                                                                                                                                                                                                                                                                                                                                                                                                                                                                                                                                 | Virology Department, Royal Infirmary of Edinburgh, NHS Lothian / School of Biological Sciences, University of Edinburgh / Institute of Genetics and Molecular Medicine, University of Edinburgh |                                                                                                                         | COVID-19 Genomics UK (COG-UK) Consortium                                   | McHugh M, Dewar R, Rooke S, Gallagher M, Balcaza C, O'Toole Á, Scher E, Hill V, McCrone JT, Colquhoun R, Yu X, Jackson B, Rambaut A, Williams TC, Templeton K                                                                                                                                                                                                                                                                                                                                                                                                                                                                                                                                             |
| EPI_ISL_919629, EPI_ISL_919630, EPI_ISL_919663, EPI_ISL_919706, EPI_ISL_919707, EPI_ISL_919708, EPI_ISL_919709, EPI_ISL_919710, EPI_ISL_919712, EPI_ISL_919713, EPI_ISL_919714, EPI_ISL_919715, EPI_ISL_919716, EPI_ISL_919717, EPI_ISL_919718, EPI_ISL_919719, EPI_ISL_919720, EPI_ISL_919721, EPI_ISL_919722, EPI_ISL_919723, EPI_ISL_919724                                                                                                                                                                                                                                                                                                                 | see above                                                                                                                                                                                       | Liverpool Clinical Laboratories                                                                                         | COVID-19 Genomics UK (COG-UK) Consortium                                   | Sam Haldenby, Anita Lucaci, Steve Paterson, Julian Hiscox, Alistair Darby, M Almsaud, A Alrezaihi, Muhannad Alruwaili, Stuart D Armstrong, Jones Benjamin, Eleanor G Bentley, Anu Chawla, Jordan J Clark, Angela Cowell, Richard Eccles, Isabel Garcia-Dorival, Matthew Gemmell, Alessandro Gerada, PKF Gilmore, Richard Gregory, Ximeng Han, Catherine Hartley, Margaret Hughes, Miren Iturriza-Gomara, James Johnson, L Luu, Jenifer Manson, Charlotte Nelson, Elaine O'Toole, Cassie Olateju, Rebekah Penrice-Randal, Lucille Rainbow, N.P Randle, Trevor Ian Robinson, Parul Sharma, Ghada T Shawli, James P Stewart, Neil Swainston, Ecaterina Vamos, Joanne Watts, Mark Whitehead                   |
| EPI_ISL_919871, EPI_ISL_919872, EPI_ISL_919873, EPI_ISL_919881, EPI_ISL_919903, EPI_ISL_919904, EPI_ISL_919905, EPI_ISL_919906, EPI_ISL_919907, EPI_ISL_919908, EPI_ISL_919909, EPI_ISL_919910, EPI_ISL_919911, EPI_ISL_919912, EPI_ISL_919913, EPI_ISL_919914, EPI_ISL_919915, EPI_ISL_919916, EPI_ISL_919917, EPI_ISL_919918, EPI_ISL_919919, EPI_ISL_919927, EPI_ISL_919928, EPI_ISL_919929, EPI_ISL_919930, EPI_ISL_919931, EPI_ISL_919932, EPI_ISL_919934, EPI_ISL_919935, EPI_ISL_919936, EPI_ISL_919937, EPI_ISL_919938, EPI_ISL_919939, EPI_ISL_919940, EPI_ISL_919941, EPI_ISL_919942                                                                 |                                                                                                                                                                                                 |                                                                                                                         |                                                                            |                                                                                                                                                                                                                                                                                                                                                                                                                                                                                                                                                                                                                                                                                                           |

|                                                                                                                                                                                                                                                                                                                                                                                                                                                                                                                                                                                                                                                                                                                                                                                                                                                                                                                                                                                                                                                                                                                                                                                                                                                                                                                                                                                                                                                                                                                                                                                                                                                                                                                                                                                                                                                                                                                                                                                                                                                                                                                                                                                                                                                                                                                                                                                                                                                                                                                                                                                                                                                                                                                                                                                                                                                                                                                                                                                                                                                                                                                                                                                                                                                                                                                                                                                                                                                                                                                                                                                                                                                                                                                                                                                                                                                                                                                                                                                                                                                                                                                                                                                                                                                                                                                                                                                                                                                                                                                                                                                                                                                                                                                                                                                                                                                                                                                                                                                                                                                                                                                                                                                                                                                                                                                                                                                                                                                                                                                                                                                                                                                                                                                                                                                                                                                                                                                                                                                                                                                                                                                                                                                                                                                                                                                                                                                                                                                                                                                                                                                                                                                                                                                                                                                                                                                                                                                                                                                                                                                                                                                                                                                                                                                                                                                                                                                                                                                                                                                                                                                                                                                                                                                                                                                                                                                                                                                                                                                                                                                                                                                                                                                                                                                                                                                                                                                                                                                                                                                                                                                                                                                                                                                                                                                                                                                                                                                                                                                                                                                                                                                                                                                                                                                                                                                                                                                                                                                                                                                                                                                                                                                                                                                                                                                                                                                                                                                                                                                                                                                                                                                                                                                                                                                                                                                                                                                                                                                                                                                                                                                                                                                                                                                                                                                                                                                                                                                                                                |                                                                                                                                                                                                                     |                                                                            |                                                                                                                                                                                                                                                                                                                                                         |
|----------------------------------------------------------------------------------------------------------------------------------------------------------------------------------------------------------------------------------------------------------------------------------------------------------------------------------------------------------------------------------------------------------------------------------------------------------------------------------------------------------------------------------------------------------------------------------------------------------------------------------------------------------------------------------------------------------------------------------------------------------------------------------------------------------------------------------------------------------------------------------------------------------------------------------------------------------------------------------------------------------------------------------------------------------------------------------------------------------------------------------------------------------------------------------------------------------------------------------------------------------------------------------------------------------------------------------------------------------------------------------------------------------------------------------------------------------------------------------------------------------------------------------------------------------------------------------------------------------------------------------------------------------------------------------------------------------------------------------------------------------------------------------------------------------------------------------------------------------------------------------------------------------------------------------------------------------------------------------------------------------------------------------------------------------------------------------------------------------------------------------------------------------------------------------------------------------------------------------------------------------------------------------------------------------------------------------------------------------------------------------------------------------------------------------------------------------------------------------------------------------------------------------------------------------------------------------------------------------------------------------------------------------------------------------------------------------------------------------------------------------------------------------------------------------------------------------------------------------------------------------------------------------------------------------------------------------------------------------------------------------------------------------------------------------------------------------------------------------------------------------------------------------------------------------------------------------------------------------------------------------------------------------------------------------------------------------------------------------------------------------------------------------------------------------------------------------------------------------------------------------------------------------------------------------------------------------------------------------------------------------------------------------------------------------------------------------------------------------------------------------------------------------------------------------------------------------------------------------------------------------------------------------------------------------------------------------------------------------------------------------------------------------------------------------------------------------------------------------------------------------------------------------------------------------------------------------------------------------------------------------------------------------------------------------------------------------------------------------------------------------------------------------------------------------------------------------------------------------------------------------------------------------------------------------------------------------------------------------------------------------------------------------------------------------------------------------------------------------------------------------------------------------------------------------------------------------------------------------------------------------------------------------------------------------------------------------------------------------------------------------------------------------------------------------------------------------------------------------------------------------------------------------------------------------------------------------------------------------------------------------------------------------------------------------------------------------------------------------------------------------------------------------------------------------------------------------------------------------------------------------------------------------------------------------------------------------------------------------------------------------------------------------------------------------------------------------------------------------------------------------------------------------------------------------------------------------------------------------------------------------------------------------------------------------------------------------------------------------------------------------------------------------------------------------------------------------------------------------------------------------------------------------------------------------------------------------------------------------------------------------------------------------------------------------------------------------------------------------------------------------------------------------------------------------------------------------------------------------------------------------------------------------------------------------------------------------------------------------------------------------------------------------------------------------------------------------------------------------------------------------------------------------------------------------------------------------------------------------------------------------------------------------------------------------------------------------------------------------------------------------------------------------------------------------------------------------------------------------------------------------------------------------------------------------------------------------------------------------------------------------------------------------------------------------------------------------------------------------------------------------------------------------------------------------------------------------------------------------------------------------------------------------------------------------------------------------------------------------------------------------------------------------------------------------------------------------------------------------------------------------------------------------------------------------------------------------------------------------------------------------------------------------------------------------------------------------------------------------------------------------------------------------------------------------------------------------------------------------------------------------------------------------------------------------------------------------------------------------------------------------------------------------------------------------------------------------------------------------------------------------------------------------------------------------------------------------------------------------------------------------------------------------------------------------------------------------------------------------------------------------------------------------------------------------------------------------------------------------------------------------------------------------------------------------------------------------------------------------------------------------------------------------------------------------------------------------------------------------------------------------------------------------------------------------------------------------------------------------------------------------------------------------------------------------------------------------------------------------------------------------------------------------------------------------------------------------------------------------------------------------------------------------------------------------------------------------------------------------------------------------------------------------------------------------------------------------------------------------------------------------------------------------------------------------------------------------------------------------------------------------------------------------------------------------------------------------------------------------------------------------------------------------------------------------------------------------------------------------------------------------------------------------------------------------------------------------------------------------------------------------------------------------------------------------------------------------------------------------------------------------------------------------------------------------------------------------------------------------------------------------------------------------------------------------------------------------------------------------------------------------------------------------------------------------------------------------------------------------------------------------------------------------------------------------------------------------------------------------------------------------------------------------------------------------------------------------------------------------------------------------------------------------------------------------------------------------------|---------------------------------------------------------------------------------------------------------------------------------------------------------------------------------------------------------------------|----------------------------------------------------------------------------|---------------------------------------------------------------------------------------------------------------------------------------------------------------------------------------------------------------------------------------------------------------------------------------------------------------------------------------------------------|
| EPI_ISL_919943, EPI_ISL_919944, EPI_ISL_919946, EPI_ISL_919947, EPI_ISL_919948, EPI_ISL_919949, EPI_ISL_919950, EPI_ISL_919951, EPI_ISL_919953, EPI_ISL_919954, EPI_ISL_919956, EPI_ISL_919958, EPI_ISL_919959, EPI_ISL_919960, EPI_ISL_920092, EPI_ISL_920093, EPI_ISL_920094, EPI_ISL_920095, EPI_ISL_920096, EPI_ISL_920097, EPI_ISL_920098, EPI_ISL_920099, EPI_ISL_920100, EPI_ISL_920101, EPI_ISL_920102, EPI_ISL_920103, EPI_ISL_920104, EPI_ISL_920105, EPI_ISL_920106, EPI_ISL_920107, EPI_ISL_920108, EPI_ISL_920109, EPI_ISL_920110, EPI_ISL_920111, EPI_ISL_920112, EPI_ISL_920113, EPI_ISL_920114, EPI_ISL_920115, EPI_ISL_920116, EPI_ISL_920152                                                                                                                                                                                                                                                                                                                                                                                                                                                                                                                                                                                                                                                                                                                                                                                                                                                                                                                                                                                                                                                                                                                                                                                                                                                                                                                                                                                                                                                                                                                                                                                                                                                                                                                                                                                                                                                                                                                                                                                                                                                                                                                                                                                                                                                                                                                                                                                                                                                                                                                                                                                                                                                                                                                                                                                                                                                                                                                                                                                                                                                                                                                                                                                                                                                                                                                                                                                                                                                                                                                                                                                                                                                                                                                                                                                                                                                                                                                                                                                                                                                                                                                                                                                                                                                                                                                                                                                                                                                                                                                                                                                                                                                                                                                                                                                                                                                                                                                                                                                                                                                                                                                                                                                                                                                                                                                                                                                                                                                                                                                                                                                                                                                                                                                                                                                                                                                                                                                                                                                                                                                                                                                                                                                                                                                                                                                                                                                                                                                                                                                                                                                                                                                                                                                                                                                                                                                                                                                                                                                                                                                                                                                                                                                                                                                                                                                                                                                                                                                                                                                                                                                                                                                                                                                                                                                                                                                                                                                                                                                                                                                                                                                                                                                                                                                                                                                                                                                                                                                                                                                                                                                                                                                                                                                                                                                                                                                                                                                                                                                                                                                                                                                                                                                                                                                                                                                                                                                                                                                                                                                                                                                                                                                                                                                                                                                                                                                                                                                                                                                                                                                                                                                                                                                                                                                                                                 |                                                                                                                                                                                                                     |                                                                            |                                                                                                                                                                                                                                                                                                                                                         |
| see above                                                                                                                                                                                                                                                                                                                                                                                                                                                                                                                                                                                                                                                                                                                                                                                                                                                                                                                                                                                                                                                                                                                                                                                                                                                                                                                                                                                                                                                                                                                                                                                                                                                                                                                                                                                                                                                                                                                                                                                                                                                                                                                                                                                                                                                                                                                                                                                                                                                                                                                                                                                                                                                                                                                                                                                                                                                                                                                                                                                                                                                                                                                                                                                                                                                                                                                                                                                                                                                                                                                                                                                                                                                                                                                                                                                                                                                                                                                                                                                                                                                                                                                                                                                                                                                                                                                                                                                                                                                                                                                                                                                                                                                                                                                                                                                                                                                                                                                                                                                                                                                                                                                                                                                                                                                                                                                                                                                                                                                                                                                                                                                                                                                                                                                                                                                                                                                                                                                                                                                                                                                                                                                                                                                                                                                                                                                                                                                                                                                                                                                                                                                                                                                                                                                                                                                                                                                                                                                                                                                                                                                                                                                                                                                                                                                                                                                                                                                                                                                                                                                                                                                                                                                                                                                                                                                                                                                                                                                                                                                                                                                                                                                                                                                                                                                                                                                                                                                                                                                                                                                                                                                                                                                                                                                                                                                                                                                                                                                                                                                                                                                                                                                                                                                                                                                                                                                                                                                                                                                                                                                                                                                                                                                                                                                                                                                                                                                                                                                                                                                                                                                                                                                                                                                                                                                                                                                                                                                                                                                                                                                                                                                                                                                                                                                                                                                                                                                                                                                                                      | University College London, Great Ormond Street Hospital for Children NHS Foundation Trust, Imperial College Healthcare NHS Trust                                                                                    | COVID-19 Genomics UK (COG-UK) Consortium                                   | Sergi Castellano, Rachel Williams, Mark Kristiansen, Paola Resende Silva, Sunando Roy, Tony Brooks, Helena Tutill, Paola Niola, Patricia Dyal, Charlotte Williams, Leysa Forrest, Yasmin Panchbhaya, Jacqueline Findlay, Samuel Weeks, Julianne Brown, Kathryn Harris, Paul Randell, James Price, Alison Holmes, Judith Breuer                          |
| EPI_ISL_920671, EPI_ISL_920685, EPI_ISL_920693, EPI_ISL_920701, EPI_ISL_920702, EPI_ISL_920723, EPI_ISL_920724, EPI_ISL_920725, EPI_ISL_920728, EPI_ISL_920731, EPI_ISL_920732, EPI_ISL_920733, EPI_ISL_920734, EPI_ISL_920752, EPI_ISL_920756, EPI_ISL_920757, EPI_ISL_920758, EPI_ISL_920761, EPI_ISL_920763, EPI_ISL_920771, EPI_ISL_920776, EPI_ISL_920777, EPI_ISL_920778, EPI_ISL_920779, EPI_ISL_920780                                                                                                                                                                                                                                                                                                                                                                                                                                                                                                                                                                                                                                                                                                                                                                                                                                                                                                                                                                                                                                                                                                                                                                                                                                                                                                                                                                                                                                                                                                                                                                                                                                                                                                                                                                                                                                                                                                                                                                                                                                                                                                                                                                                                                                                                                                                                                                                                                                                                                                                                                                                                                                                                                                                                                                                                                                                                                                                                                                                                                                                                                                                                                                                                                                                                                                                                                                                                                                                                                                                                                                                                                                                                                                                                                                                                                                                                                                                                                                                                                                                                                                                                                                                                                                                                                                                                                                                                                                                                                                                                                                                                                                                                                                                                                                                                                                                                                                                                                                                                                                                                                                                                                                                                                                                                                                                                                                                                                                                                                                                                                                                                                                                                                                                                                                                                                                                                                                                                                                                                                                                                                                                                                                                                                                                                                                                                                                                                                                                                                                                                                                                                                                                                                                                                                                                                                                                                                                                                                                                                                                                                                                                                                                                                                                                                                                                                                                                                                                                                                                                                                                                                                                                                                                                                                                                                                                                                                                                                                                                                                                                                                                                                                                                                                                                                                                                                                                                                                                                                                                                                                                                                                                                                                                                                                                                                                                                                                                                                                                                                                                                                                                                                                                                                                                                                                                                                                                                                                                                                                                                                                                                                                                                                                                                                                                                                                                                                                                                                                                                                                                                                                                                                                                                                                                                                                                                                                                                                                                                                                                                                                 |                                                                                                                                                                                                                     |                                                                            |                                                                                                                                                                                                                                                                                                                                                         |
| see above                                                                                                                                                                                                                                                                                                                                                                                                                                                                                                                                                                                                                                                                                                                                                                                                                                                                                                                                                                                                                                                                                                                                                                                                                                                                                                                                                                                                                                                                                                                                                                                                                                                                                                                                                                                                                                                                                                                                                                                                                                                                                                                                                                                                                                                                                                                                                                                                                                                                                                                                                                                                                                                                                                                                                                                                                                                                                                                                                                                                                                                                                                                                                                                                                                                                                                                                                                                                                                                                                                                                                                                                                                                                                                                                                                                                                                                                                                                                                                                                                                                                                                                                                                                                                                                                                                                                                                                                                                                                                                                                                                                                                                                                                                                                                                                                                                                                                                                                                                                                                                                                                                                                                                                                                                                                                                                                                                                                                                                                                                                                                                                                                                                                                                                                                                                                                                                                                                                                                                                                                                                                                                                                                                                                                                                                                                                                                                                                                                                                                                                                                                                                                                                                                                                                                                                                                                                                                                                                                                                                                                                                                                                                                                                                                                                                                                                                                                                                                                                                                                                                                                                                                                                                                                                                                                                                                                                                                                                                                                                                                                                                                                                                                                                                                                                                                                                                                                                                                                                                                                                                                                                                                                                                                                                                                                                                                                                                                                                                                                                                                                                                                                                                                                                                                                                                                                                                                                                                                                                                                                                                                                                                                                                                                                                                                                                                                                                                                                                                                                                                                                                                                                                                                                                                                                                                                                                                                                                                                                                                                                                                                                                                                                                                                                                                                                                                                                                                                                                                                      | University College London Hospital                                                                                                                                                                                  | COVID-19 Genomics UK (COG-UK) Consortium                                   | Judith Heaney, Matthew Byott, Catherine Houlihan, Dan Frampton, Stuart Kirk, Moira Spyer and Eleni Nastouli                                                                                                                                                                                                                                             |
| EPI_ISL_921659, EPI_ISL_921660, EPI_ISL_921661, EPI_ISL_921662                                                                                                                                                                                                                                                                                                                                                                                                                                                                                                                                                                                                                                                                                                                                                                                                                                                                                                                                                                                                                                                                                                                                                                                                                                                                                                                                                                                                                                                                                                                                                                                                                                                                                                                                                                                                                                                                                                                                                                                                                                                                                                                                                                                                                                                                                                                                                                                                                                                                                                                                                                                                                                                                                                                                                                                                                                                                                                                                                                                                                                                                                                                                                                                                                                                                                                                                                                                                                                                                                                                                                                                                                                                                                                                                                                                                                                                                                                                                                                                                                                                                                                                                                                                                                                                                                                                                                                                                                                                                                                                                                                                                                                                                                                                                                                                                                                                                                                                                                                                                                                                                                                                                                                                                                                                                                                                                                                                                                                                                                                                                                                                                                                                                                                                                                                                                                                                                                                                                                                                                                                                                                                                                                                                                                                                                                                                                                                                                                                                                                                                                                                                                                                                                                                                                                                                                                                                                                                                                                                                                                                                                                                                                                                                                                                                                                                                                                                                                                                                                                                                                                                                                                                                                                                                                                                                                                                                                                                                                                                                                                                                                                                                                                                                                                                                                                                                                                                                                                                                                                                                                                                                                                                                                                                                                                                                                                                                                                                                                                                                                                                                                                                                                                                                                                                                                                                                                                                                                                                                                                                                                                                                                                                                                                                                                                                                                                                                                                                                                                                                                                                                                                                                                                                                                                                                                                                                                                                                                                                                                                                                                                                                                                                                                                                                                                                                                                                                                                                 | Northumbria University / South Tees Hospitals NHS Foundation Trust / North Cumbria Integrated Care NHS Foundation Trust / North Tees and Hartlepool NHS Foundation Trust / Newcastle Hospitals NHS Foundation Trust | COVID-19 Genomics UK (COG-UK) Consortium                                   | Darren L Smith, Andrew Nelson, Matthew Bashton, Greg R Young, Joshua Loh, John Allan, Mohammad A Tariq, Giles S Holt, Gary Black, Wen C Yew, Lynn Dover, Paul Baker, Steve Liggett, Sarah Essex, Jane Greenaway, Debra Padgett, Clive Graham, Garren Scott, Edward Barron, Emma Swindells, Brendan Payne, Jennifer Collins, Yusra Taha, Gary Eltringham |
| EPI_ISL_922037, EPI_ISL_922038, EPI_ISL_922039, EPI_ISL_922040                                                                                                                                                                                                                                                                                                                                                                                                                                                                                                                                                                                                                                                                                                                                                                                                                                                                                                                                                                                                                                                                                                                                                                                                                                                                                                                                                                                                                                                                                                                                                                                                                                                                                                                                                                                                                                                                                                                                                                                                                                                                                                                                                                                                                                                                                                                                                                                                                                                                                                                                                                                                                                                                                                                                                                                                                                                                                                                                                                                                                                                                                                                                                                                                                                                                                                                                                                                                                                                                                                                                                                                                                                                                                                                                                                                                                                                                                                                                                                                                                                                                                                                                                                                                                                                                                                                                                                                                                                                                                                                                                                                                                                                                                                                                                                                                                                                                                                                                                                                                                                                                                                                                                                                                                                                                                                                                                                                                                                                                                                                                                                                                                                                                                                                                                                                                                                                                                                                                                                                                                                                                                                                                                                                                                                                                                                                                                                                                                                                                                                                                                                                                                                                                                                                                                                                                                                                                                                                                                                                                                                                                                                                                                                                                                                                                                                                                                                                                                                                                                                                                                                                                                                                                                                                                                                                                                                                                                                                                                                                                                                                                                                                                                                                                                                                                                                                                                                                                                                                                                                                                                                                                                                                                                                                                                                                                                                                                                                                                                                                                                                                                                                                                                                                                                                                                                                                                                                                                                                                                                                                                                                                                                                                                                                                                                                                                                                                                                                                                                                                                                                                                                                                                                                                                                                                                                                                                                                                                                                                                                                                                                                                                                                                                                                                                                                                                                                                                                                 | Queens Medical Centre, Clinical Microbiology Department / DeepSeq Nottingham                                                                                                                                        | COVID-19 Genomics UK (COG-UK) Consortium                                   | Gemma Clark, Wendy Smith, Manjinder Khakh, Vicki M Fleming, Michelle M Lister, Hannah Howson-Wells, Jonathan Ball, Patrick McClure, Joseph Chappell, Theocharis Tsoleiridis, Nadine Holmes, Matthew Carlisle, Christopher Moore, Fei Sang, Johnny Debebe, Victoria Wright, Matthew Loose                                                                |
| EPI_ISL_923349                                                                                                                                                                                                                                                                                                                                                                                                                                                                                                                                                                                                                                                                                                                                                                                                                                                                                                                                                                                                                                                                                                                                                                                                                                                                                                                                                                                                                                                                                                                                                                                                                                                                                                                                                                                                                                                                                                                                                                                                                                                                                                                                                                                                                                                                                                                                                                                                                                                                                                                                                                                                                                                                                                                                                                                                                                                                                                                                                                                                                                                                                                                                                                                                                                                                                                                                                                                                                                                                                                                                                                                                                                                                                                                                                                                                                                                                                                                                                                                                                                                                                                                                                                                                                                                                                                                                                                                                                                                                                                                                                                                                                                                                                                                                                                                                                                                                                                                                                                                                                                                                                                                                                                                                                                                                                                                                                                                                                                                                                                                                                                                                                                                                                                                                                                                                                                                                                                                                                                                                                                                                                                                                                                                                                                                                                                                                                                                                                                                                                                                                                                                                                                                                                                                                                                                                                                                                                                                                                                                                                                                                                                                                                                                                                                                                                                                                                                                                                                                                                                                                                                                                                                                                                                                                                                                                                                                                                                                                                                                                                                                                                                                                                                                                                                                                                                                                                                                                                                                                                                                                                                                                                                                                                                                                                                                                                                                                                                                                                                                                                                                                                                                                                                                                                                                                                                                                                                                                                                                                                                                                                                                                                                                                                                                                                                                                                                                                                                                                                                                                                                                                                                                                                                                                                                                                                                                                                                                                                                                                                                                                                                                                                                                                                                                                                                                                                                                                                                                                                 | Centre for Enzyme Innovation, University of Portsmouth / Translational Research Laboratory, Portsmouth Hospitals NHS Trust                                                                                          | COVID-19 Genomics UK (COG-UK) Consortium                                   | Angela Beckett, Salman Goudarzi, Christopher Fearn, Kate Cook, Katie Loveson, Sharon Glaysher, Scott Elliott, Samuel Robson                                                                                                                                                                                                                             |
| EPI_ISL_924082, EPI_ISL_924085, EPI_ISL_924087, EPI_ISL_924089, EPI_ISL_924092, EPI_ISL_924097, EPI_ISL_924099, EPI_ISL_924103, EPI_ISL_924105, EPI_ISL_924109, EPI_ISL_924111, EPI_ISL_924112, EPI_ISL_924117, EPI_ISL_924118, EPI_ISL_924125, EPI_ISL_924126, EPI_ISL_924129, EPI_ISL_924131, EPI_ISL_924136, EPI_ISL_924142, EPI_ISL_924144, EPI_ISL_924146, EPI_ISL_924151, EPI_ISL_924160, EPI_ISL_924163, EPI_ISL_924165, EPI_ISL_924173, EPI_ISL_924183, EPI_ISL_924184, EPI_ISL_924185, EPI_ISL_924186, EPI_ISL_924191, EPI_ISL_924193, EPI_ISL_924198, EPI_ISL_924200, EPI_ISL_924201, EPI_ISL_924209, EPI_ISL_924212, EPI_ISL_924216, EPI_ISL_924217, EPI_ISL_924223, EPI_ISL_924227, EPI_ISL_924228, EPI_ISL_924229, EPI_ISL_924235, EPI_ISL_924238, EPI_ISL_924243, EPI_ISL_924249, EPI_ISL_924251, EPI_ISL_924258, EPI_ISL_924263, EPI_ISL_924269, EPI_ISL_924273, EPI_ISL_924276, EPI_ISL_924277, EPI_ISL_924282, EPI_ISL_924287, EPI_ISL_924297, EPI_ISL_924298, EPI_ISL_924304, EPI_ISL_924305, EPI_ISL_924306, EPI_ISL_924308, EPI_ISL_924313, EPI_ISL_924330, EPI_ISL_924335, EPI_ISL_924339, EPI_ISL_924340, EPI_ISL_924350, EPI_ISL_924352, EPI_ISL_924356, EPI_ISL_924359, EPI_ISL_924361, EPI_ISL_924366, EPI_ISL_924368, EPI_ISL_924374, EPI_ISL_924377, EPI_ISL_924379, EPI_ISL_924382, EPI_ISL_924390, EPI_ISL_924410, EPI_ISL_924414                                                                                                                                                                                                                                                                                                                                                                                                                                                                                                                                                                                                                                                                                                                                                                                                                                                                                                                                                                                                                                                                                                                                                                                                                                                                                                                                                                                                                                                                                                                                                                                                                                                                                                                                                                                                                                                                                                                                                                                                                                                                                                                                                                                                                                                                                                                                                                                                                                                                                                                                                                                                                                                                                                                                                                                                                                                                                                                                                                                                                                                                                                                                                                                                                                                                                                                                                                                                                                                                                                                                                                                                                                                                                                                                                                                                                                                                                                                                                                                                                                                                                                                                                                                                                                                                                                                                                                                                                                                                                                                                                                                                                                                                                                                                                                                                                                                                                                                                                                                                                                                                                                                                                                                                                                                                                                                                                                                                                                                                                                                                                                                                                                                                                                                                                                                                                                                                                                                                                                                                                                                                                                                                                                                                                                                                                                                                                                                                                                                                                                                                                                                                                                                                                                                                                                                                                                                                                                                                                                                                                                                                                                                                                                                                                                                                                                                                                                                                                                                                                                                                                                                                                                                                                                                                                                                                                                                                                                                                                                                                                                                                                                                                                                                                                                                                                                                                                                                                                                                                                                                                                                                                                                                                                                                                                                                                                                                                                                                                                                                                                                                                                                                                                                                                                                                                                                                                                                                                                                                                                                                                                                                                 |                                                                                                                                                                                                                     |                                                                            |                                                                                                                                                                                                                                                                                                                                                         |
| see above                                                                                                                                                                                                                                                                                                                                                                                                                                                                                                                                                                                                                                                                                                                                                                                                                                                                                                                                                                                                                                                                                                                                                                                                                                                                                                                                                                                                                                                                                                                                                                                                                                                                                                                                                                                                                                                                                                                                                                                                                                                                                                                                                                                                                                                                                                                                                                                                                                                                                                                                                                                                                                                                                                                                                                                                                                                                                                                                                                                                                                                                                                                                                                                                                                                                                                                                                                                                                                                                                                                                                                                                                                                                                                                                                                                                                                                                                                                                                                                                                                                                                                                                                                                                                                                                                                                                                                                                                                                                                                                                                                                                                                                                                                                                                                                                                                                                                                                                                                                                                                                                                                                                                                                                                                                                                                                                                                                                                                                                                                                                                                                                                                                                                                                                                                                                                                                                                                                                                                                                                                                                                                                                                                                                                                                                                                                                                                                                                                                                                                                                                                                                                                                                                                                                                                                                                                                                                                                                                                                                                                                                                                                                                                                                                                                                                                                                                                                                                                                                                                                                                                                                                                                                                                                                                                                                                                                                                                                                                                                                                                                                                                                                                                                                                                                                                                                                                                                                                                                                                                                                                                                                                                                                                                                                                                                                                                                                                                                                                                                                                                                                                                                                                                                                                                                                                                                                                                                                                                                                                                                                                                                                                                                                                                                                                                                                                                                                                                                                                                                                                                                                                                                                                                                                                                                                                                                                                                                                                                                                                                                                                                                                                                                                                                                                                                                                                                                                                                                                                      | Virology Department, Sheffield Teaching Hospitals NHS Foundation Trust/Department of Infection, Immunity and Cardiovascular Disease, The Medical School, University of Sheffield                                    | COVID-19 Genomics UK (COG-UK) Consortium                                   | Thushan de Silva, Matthew Parker, Nikki Smith, Adri Angyal, Rebecca Brown, Luke Green, Rachel Tucker, Paul Parsons, Danielle Groves, Katie Johnson, Laura Carrilero, Alex Keeley, Dave Partridge, Matthew Wyles, Benjamin Lindsey, Mehmet Yavuz, Mohammad Raza, Cariad Evans                                                                            |
| EPI_ISL_931586, EPI_ISL_931587, EPI_ISL_931588, EPI_ISL_931590, EPI_ISL_931591, EPI_ISL_931592, EPI_ISL_931593, EPI_ISL_931594, EPI_ISL_931596, EPI_ISL_931597, EPI_ISL_931600, EPI_ISL_931601, EPI_ISL_931602, EPI_ISL_931603, EPI_ISL_931604, EPI_ISL_931605, EPI_ISL_931606, EPI_ISL_931607, EPI_ISL_931608, EPI_ISL_931609, EPI_ISL_931610, EPI_ISL_931611, EPI_ISL_931612, EPI_ISL_931613, EPI_ISL_931614, EPI_ISL_931615, EPI_ISL_931616, EPI_ISL_931619, EPI_ISL_931620, EPI_ISL_931621, EPI_ISL_931622, EPI_ISL_931623, EPI_ISL_931624, EPI_ISL_931625, EPI_ISL_931626, EPI_ISL_931627, EPI_ISL_931628, EPI_ISL_931629, EPI_ISL_931630, EPI_ISL_931631, EPI_ISL_931632, EPI_ISL_931633, EPI_ISL_931634, EPI_ISL_931635, EPI_ISL_931636, EPI_ISL_931637, EPI_ISL_931638, EPI_ISL_931639, EPI_ISL_931640, EPI_ISL_931641, EPI_ISL_931642, EPI_ISL_931643, EPI_ISL_931644, EPI_ISL_931645, EPI_ISL_931646, EPI_ISL_931647, EPI_ISL_931648, EPI_ISL_931649, EPI_ISL_931650, EPI_ISL_931651, EPI_ISL_931652, EPI_ISL_931653, EPI_ISL_931654, EPI_ISL_931655, EPI_ISL_931656, EPI_ISL_931657, EPI_ISL_931658, EPI_ISL_931659, EPI_ISL_931660, EPI_ISL_931661, EPI_ISL_931662, EPI_ISL_931663, EPI_ISL_931664, EPI_ISL_931665, EPI_ISL_931666, EPI_ISL_931667, EPI_ISL_931668, EPI_ISL_931669, EPI_ISL_931670, EPI_ISL_931671, EPI_ISL_931672, EPI_ISL_931673, EPI_ISL_931674, EPI_ISL_931675, EPI_ISL_931676, EPI_ISL_931677, EPI_ISL_931678, EPI_ISL_931679, EPI_ISL_931680, EPI_ISL_931681, EPI_ISL_931682, EPI_ISL_931683, EPI_ISL_931684, EPI_ISL_931685, EPI_ISL_931686, EPI_ISL_931687, EPI_ISL_931688, EPI_ISL_931689, EPI_ISL_931690, EPI_ISL_931691, EPI_ISL_931692, EPI_ISL_931693, EPI_ISL_931694, EPI_ISL_931695, EPI_ISL_931696, EPI_ISL_931697, EPI_ISL_931698, EPI_ISL_931699, EPI_ISL_931700, EPI_ISL_931701, EPI_ISL_931702, EPI_ISL_931703, EPI_ISL_931704, EPI_ISL_931705, EPI_ISL_931706, EPI_ISL_931707, EPI_ISL_931708, EPI_ISL_931709, EPI_ISL_931710, EPI_ISL_931711, EPI_ISL_931712, EPI_ISL_931713, EPI_ISL_931714, EPI_ISL_931715, EPI_ISL_931716, EPI_ISL_931717, EPI_ISL_931718, EPI_ISL_931719, EPI_ISL_931720, EPI_ISL_931721, EPI_ISL_931722, EPI_ISL_931723, EPI_ISL_931724, EPI_ISL_931725, EPI_ISL_931727, EPI_ISL_931728, EPI_ISL_931729, EPI_ISL_931730, EPI_ISL_931731, EPI_ISL_931732, EPI_ISL_931733, EPI_ISL_931734, EPI_ISL_931735, EPI_ISL_931736, EPI_ISL_931737, EPI_ISL_931738, EPI_ISL_931739, EPI_ISL_931740, EPI_ISL_931741, EPI_ISL_931742, EPI_ISL_931743, EPI_ISL_931744, EPI_ISL_931745, EPI_ISL_931746, EPI_ISL_931747, EPI_ISL_931748, EPI_ISL_931749, EPI_ISL_931750, EPI_ISL_931751, EPI_ISL_931752, EPI_ISL_931753, EPI_ISL_931754, EPI_ISL_931755, EPI_ISL_931756, EPI_ISL_931757, EPI_ISL_931758, EPI_ISL_931759, EPI_ISL_931760, EPI_ISL_931761, EPI_ISL_931762, EPI_ISL_931763, EPI_ISL_931764, EPI_ISL_931765, EPI_ISL_931766, EPI_ISL_931767, EPI_ISL_931768, EPI_ISL_931769, EPI_ISL_931770, EPI_ISL_931771, EPI_ISL_931772, EPI_ISL_931773, EPI_ISL_931774, EPI_ISL_931775, EPI_ISL_931776, EPI_ISL_931777, EPI_ISL_931778, EPI_ISL_931779, EPI_ISL_931780, EPI_ISL_931781, EPI_ISL_931782, EPI_ISL_931783, EPI_ISL_931784, EPI_ISL_931785, EPI_ISL_931786, EPI_ISL_931787, EPI_ISL_931788, EPI_ISL_931789, EPI_ISL_931790, EPI_ISL_931791, EPI_ISL_931792, EPI_ISL_931793, EPI_ISL_931794, EPI_ISL_931795, EPI_ISL_931796, EPI_ISL_931797, EPI_ISL_931798, EPI_ISL_931799, EPI_ISL_931800, EPI_ISL_931801, EPI_ISL_931802, EPI_ISL_931803, EPI_ISL_931804, EPI_ISL_931805, EPI_ISL_931806, EPI_ISL_931807, EPI_ISL_931808, EPI_ISL_931809, EPI_ISL_931810, EPI_ISL_931811, EPI_ISL_931812, EPI_ISL_931813, EPI_ISL_931814, EPI_ISL_931815, EPI_ISL_931816, EPI_ISL_931817, EPI_ISL_931818, EPI_ISL_931819, EPI_ISL_931820, EPI_ISL_931821, EPI_ISL_931822, EPI_ISL_931823, EPI_ISL_931824, EPI_ISL_931825, EPI_ISL_931826, EPI_ISL_931827, EPI_ISL_931828, EPI_ISL_931829, EPI_ISL_931830, EPI_ISL_931831, EPI_ISL_931832, EPI_ISL_931833, EPI_ISL_931834, EPI_ISL_931835, EPI_ISL_931836, EPI_ISL_931837, EPI_ISL_931838, EPI_ISL_931839, EPI_ISL_931840, EPI_ISL_931841, EPI_ISL_931842, EPI_ISL_931843, EPI_ISL_931844, EPI_ISL_931845, EPI_ISL_931846, EPI_ISL_931847, EPI_ISL_931848, EPI_ISL_931849, EPI_ISL_931850, EPI_ISL_931851, EPI_ISL_931852, EPI_ISL_931853, EPI_ISL_931854, EPI_ISL_931855, EPI_ISL_931856, EPI_ISL_931857, EPI_ISL_931858, EPI_ISL_931859, EPI_ISL_931860, EPI_ISL_931861, EPI_ISL_931862, EPI_ISL_931863, EPI_ISL_931864, EPI_ISL_931865, EPI_ISL_931866, EPI_ISL_931867, EPI_ISL_931868, EPI_ISL_931869, EPI_ISL_931870, EPI_ISL_931871, EPI_ISL_931872, EPI_ISL_931873, EPI_ISL_931874, EPI_ISL_931875, EPI_ISL_931876, EPI_ISL_931877, EPI_ISL_931878, EPI_ISL_931879, EPI_ISL_931880, EPI_ISL_931881, EPI_ISL_931882, EPI_ISL_931883, EPI_ISL_931884, EPI_ISL_931885, EPI_ISL_931886, EPI_ISL_931887, EPI_ISL_931888, EPI_ISL_931889, EPI_ISL_931890, EPI_ISL_931891, EPI_ISL_931892, EPI_ISL_931893, EPI_ISL_931894, EPI_ISL_931895, EPI_ISL_931896, EPI_ISL_931897, EPI_ISL_931898, EPI_ISL_931899, EPI_ISL_931900, EPI_ISL_931901, EPI_ISL_931902, EPI_ISL_931903, EPI_ISL_931904, EPI_ISL_931905, EPI_ISL_931906, EPI_ISL_931907, EPI_ISL_931908, EPI_ISL_931909, EPI_ISL_931910, EPI_ISL_931911, EPI_ISL_931912, EPI_ISL_931913, EPI_ISL_931914, EPI_ISL_931915, EPI_ISL_931916, EPI_ISL_931917, EPI_ISL_931918, EPI_ISL_931919, EPI_ISL_931920, EPI_ISL_931921, EPI_ISL_931922, EPI_ISL_931923, EPI_ISL_931924, EPI_ISL_931925, EPI_ISL_931926, EPI_ISL_931927, EPI_ISL_931928, EPI_ISL_931929, EPI_ISL_931930, EPI_ISL_931931, EPI_ISL_931932, EPI_ISL_931933, EPI_ISL_931934, EPI_ISL_931935, EPI_ISL_931936, EPI_ISL_931937, EPI_ISL_931938, EPI_ISL_931939, EPI_ISL_931940, EPI_ISL_931941, EPI_ISL_931942, EPI_ISL_931943, EPI_ISL_931944, EPI_ISL_931945, EPI_ISL_931946, EPI_ISL_931947, EPI_ISL_931948, EPI_ISL_931949, EPI_ISL_931950, EPI_ISL_931951, EPI_ISL_931952, EPI_ISL_931953, EPI_ISL_931954, EPI_ISL_931955, EPI_ISL_931956, EPI_ISL_931957, EPI_ISL_931958, EPI_ISL_931959, EPI_ISL_931960, EPI_ISL_931961, EPI_ISL_931962, EPI_ISL_931963, EPI_ISL_931964, EPI_ISL_931965, EPI_ISL_931966, EPI_ISL_931967, EPI_ISL_931968, EPI_ISL_931969, EPI_ISL_931970, EPI_ISL_931971, EPI_ISL_931972, EPI_ISL_931973, EPI_ISL_931974, EPI_ISL_931975, EPI_ISL_931976, EPI_ISL_931977, EPI_ISL_931978, EPI_ISL_931979, EPI_ISL_931980, EPI_ISL_931981, EPI_ISL_931982, EPI_ISL_931983, EPI_ISL_931984, EPI_ISL_931985, EPI_ISL_931986, EPI_ISL_931987, EPI_ISL_931988, EPI_ISL_931989, EPI_ISL_931990, EPI_ISL_931991, EPI_ISL_931992, EPI_ISL_931993, EPI_ISL_931994, EPI_ISL_931995, EPI_ISL_931996, EPI_ISL_931997, EPI_ISL_931998, EPI_ISL_931999, EPI_ISL_932000, EPI_ISL_932001, EPI_ISL_932002, EPI_ISL_932003, EPI_ISL_932004, EPI_ISL_932005, EPI_ISL_932006, EPI_ISL_932007, EPI_ISL_932008, EPI_ISL_932009, EPI_ISL_932010, EPI_ISL_932011, EPI_ISL_932012, EPI_ISL_932013, EPI_ISL_932014, EPI_ISL_932015, EPI_ISL_932016, EPI_ISL_932017, EPI_ISL_932018, EPI_ISL_932019, EPI_ISL_932020, EPI_ISL_932021, EPI_ISL_932022, EPI_ISL_932023, EPI_ISL_932024, EPI_ISL_932025, EPI_ISL_932026, EPI_ISL_932027, EPI_ISL_932028, EPI_ISL_932029, EPI_ISL_932030, EPI_ISL_932031, EPI_ISL_932032, EPI_ISL_932033, EPI_ISL_932034, EPI_ISL_932035, EPI_ISL_932036, EPI_ISL_932037, EPI_ISL_932038, EPI_ISL_932039, EPI_ISL_932040, EPI_ISL_932041, EPI_ISL_932042, EPI_ISL_932043, EPI_ISL_932044, EPI_ISL_932045, EPI_ISL_932046, EPI_ISL_932047, EPI_ISL_932048, EPI_ISL_932049, EPI_ISL_932050, EPI_ISL_932051, EPI_ISL_932052, EPI_ISL_932053, EPI_ISL_932054, EPI_ISL_932055, EPI_ISL_932056, EPI_ISL_932057, EPI_ISL_932058, EPI_ISL_932059, EPI_ISL_932060, EPI_ISL_932061, EPI_ISL_932062, EPI_ISL_932063, EPI_ISL_932064, EPI_ISL_932065, EPI_ISL_932066, EPI_ISL_932067, EPI_ISL_932068, EPI_ISL_932069, EPI_ISL_932070, EPI_ISL_932071, EPI_ISL_932072, EPI_ISL_932073, EPI_ISL_932074, EPI_ISL_932075, EPI_ISL_932076, EPI_ISL_932077, EPI_ISL_932078, EPI_ISL_932079, EPI_ISL_932080, EPI_ISL_932081, EPI_ISL_932082, EPI_ISL_932083, EPI_ISL_932084, EPI_ISL_932085, EPI_ISL_932086, EPI_ISL_932087, EPI_ISL_932088, EPI_ISL_932089, EPI_ISL_932090, EPI_ISL_932091, EPI_ISL_932092, EPI_ISL_932093, EPI_ISL_932094, EPI_ISL_932095, EPI_ISL_932096, EPI_ISL_932097, EPI_ISL_932098, EPI_ISL_932099, EPI_ISL_932100, EPI_ISL_932101, EPI_ISL_932102, EPI_ISL_932103, EPI_ISL_932104, EPI_ISL_932105, EPI_ISL_932106, EPI_ISL_932107, EPI_ISL_932108, EPI_ISL_932109, EPI_ISL_932110, EPI_ISL_932111, EPI_ISL_932112, EPI_ISL_932113, EPI_ISL_932114, EPI_ISL_932115, EPI_ISL_932116, EPI_ISL_932117, EPI_ISL_932118, EPI_ISL_932119, EPI_ISL_932120, EPI_ISL_932121, EPI_ISL_932122, EPI_ISL_932123, EPI_ISL_932124, EPI_ISL_932125, EPI_ISL_932126, EPI_ISL_932127, EPI_ISL_932128, EPI_ISL_932129, EPI_ISL_932130, EPI_ISL_932131, EPI_ISL_932132, EPI_ISL_932133, EPI_ISL_932134, EPI_ISL_932135, EPI_ISL_932136, EPI_ISL_932137, EPI_ISL_932138, EPI_ISL_932139, EPI_ISL_932140, EPI_ISL_932141, EPI_ISL_932142, EPI_ISL_932143, EPI_ISL_932144, EPI_ISL_932145, EPI_ISL_932146, EPI_ISL_932147, EPI_ISL_932148, EPI_ISL_932149, EPI_ISL_932150, EPI_ISL_932151, EPI_ISL_932152, EPI_ISL_932153, EPI_ISL_932154, EPI_ISL_932155, EPI_ISL_932156, EPI_ISL_932157, EPI_ISL_932158, EPI_ISL_932159, EPI_ISL_932160, EPI_ISL_932161, EPI_ISL_932162, EPI_ISL_932163, EPI_ISL_932164, EPI_ISL_932165, EPI_ISL_932166, EPI_ISL_932167, EPI_ISL_932168, EPI_ISL_932169, EPI_ISL_932170, EPI_ISL_932171, EPI_ISL_932172, EPI_ISL_932173, EPI_ISL_932174, EPI_ISL_932175, EPI_ISL_932176, EPI_ISL_932177, EPI_ISL_932178, EPI_ISL_932179, EPI_ISL_932180, EPI_ISL_932181, EPI_ISL_932182, EPI_ISL_932183, EPI_ISL_932184, EPI_ISL_932185, EPI_ISL_932186, EPI_ISL_932187, EPI_ISL_932188, EPI_ISL_932189, EPI_ISL_932190, EPI_ISL_932191, EPI_ISL_932192, EPI_ISL_932193, EPI_ISL_932194, EPI_ISL_932195, EPI_ISL_932196, EPI_ISL_932197, EPI_ISL_932198, EPI_ISL_932199, EPI_ISL_932200, EPI_ISL_932201, EPI_ISL_932202, EPI_ISL_932203, EPI_ISL_932204, EPI_ISL_932205, EPI_ISL_932206, EPI_ISL_932207, EPI_ISL_932208, EPI_ISL_932209, EPI_ISL_932210, EPI_ISL_932211, EPI_ISL_932212, EPI_ISL_932213, EPI_ISL_932214, EPI_ISL_932215, EPI_ISL_932216, EPI_ISL_932217, EPI_ISL_932218, EPI_ISL_932219, EPI_ISL_932220, EPI_ISL_932221, EPI_ISL_932222, EPI_ISL_932223, EPI_ISL_932224, EPI_ISL_932225, EPI_ISL_932226, EPI_ISL_932227, EPI_ISL_932228, EPI_ISL_932229, EPI_ISL_932230, EPI_ISL_932231, EPI_ISL_932232, EPI_ISL_932233, EPI_ISL_932234, EPI_ISL_932235, EPI_ISL_932236, EPI_ISL_932237, EPI_ISL_932238, EPI_ISL_932239, EPI_ISL_932240, EPI_ISL_932241, EPI_ISL_932242, EPI_ISL_932243, EPI_ISL_932244, EPI_ISL_932245, EPI_ISL_932246, EPI_ISL_932247, EPI_ISL_932248, EPI_ISL_932249, EPI_ISL_932250 |                                                                                                                                                                                                                     |                                                                            |                                                                                                                                                                                                                                                                                                                                                         |
| see above                                                                                                                                                                                                                                                                                                                                                                                                                                                                                                                                                                                                                                                                                                                                                                                                                                                                                                                                                                                                                                                                                                                                                                                                                                                                                                                                                                                                                                                                                                                                                                                                                                                                                                                                                                                                                                                                                                                                                                                                                                                                                                                                                                                                                                                                                                                                                                                                                                                                                                                                                                                                                                                                                                                                                                                                                                                                                                                                                                                                                                                                                                                                                                                                                                                                                                                                                                                                                                                                                                                                                                                                                                                                                                                                                                                                                                                                                                                                                                                                                                                                                                                                                                                                                                                                                                                                                                                                                                                                                                                                                                                                                                                                                                                                                                                                                                                                                                                                                                                                                                                                                                                                                                                                                                                                                                                                                                                                                                                                                                                                                                                                                                                                                                                                                                                                                                                                                                                                                                                                                                                                                                                                                                                                                                                                                                                                                                                                                                                                                                                                                                                                                                                                                                                                                                                                                                                                                                                                                                                                                                                                                                                                                                                                                                                                                                                                                                                                                                                                                                                                                                                                                                                                                                                                                                                                                                                                                                                                                                                                                                                                                                                                                                                                                                                                                                                                                                                                                                                                                                                                                                                                                                                                                                                                                                                                                                                                                                                                                                                                                                                                                                                                                                                                                                                                                                                                                                                                                                                                                                                                                                                                                                                                                                                                                                                                                                                                                                                                                                                                                                                                                                                                                                                                                                                                                                                                                                                                                                                                                                                                                                                                                                                                                                                                                                                                                                                                                                                                                      | Lighthouse Lab in Alderley Park                                                                                                                                                                                     | Wellcome Sanger Institute for the COVID-19 Genomics UK (COG-UK) Consortium | Jacquelyn Wynn, Mairead Hyland, The Lighthouse Lab in Alderley Park and Alex Alderton, Roberto Amato, Sonia Goncalves, Ewan Harrison, David K. Jackson, Ian Johnston, Dominic Kwiatkowski, Cordelia Langford, John Sillitoe on behalf of the Wellcome Sanger Institute COVID-19 Surveillance Team                                                       |
| EPI_ISL_932850, EPI_ISL_932853, EPI_ISL_932855, EPI_ISL_932857, EPI_ISL_932858, EPI_ISL_932859, EPI_ISL_932860, EPI_ISL_932863, EPI_ISL_932864, EPI_ISL_932865, EPI_ISL_932870, EPI_ISL_932871, EPI_ISL_932879, EPI_ISL_932884, EPI_ISL_932885, EPI_ISL_932894, EPI_ISL_932896, EPI_ISL_932897, EPI_ISL_932899, EPI_ISL_932903, EPI_ISL_932905, EPI_ISL_932908, EPI_ISL_932914, EPI_ISL_932915, EPI_ISL_932919, EPI_ISL_932920, EPI_ISL_932921, EPI_ISL_932925, EPI_ISL_932929, EPI_ISL_932930, EPI_ISL_932931, EPI_ISL_932932, EPI_ISL_932933, EPI_ISL_932934, EPI_ISL_932935, EPI_ISL_932936, EPI_ISL_932937, EPI_ISL_932938, EPI_ISL_932939, EPI_ISL_932940, EPI_ISL_932944, EPI_ISL_932948, EPI_ISL_932949, EPI_ISL_932955, EPI_ISL_932957, EPI_ISL_932958, EPI_ISL_932959, EPI_ISL_932960, EPI_ISL_932961, EPI_ISL_932966, EPI_ISL_932967, EPI_ISL_932970, EPI_ISL_932980, EPI_ISL_932981, EPI_ISL_932982, EPI_ISL_932983, EPI_ISL_932984, EPI_ISL_932985, EPI_ISL_932986, EPI_ISL_932987, EPI_ISL_932988, EPI_ISL_932989, EPI_ISL_932990, EPI_ISL_932991, EPI_ISL_932992, EPI_ISL_932993, EPI_ISL_932994, EPI_ISL_932995, EPI_ISL_932996, EPI_ISL_932997, EPI_ISL_932998, EPI_ISL_932999, EPI_ISL_933000, EPI_ISL_933001, EPI_ISL_933002, EPI_ISL_933003, EPI_ISL_933004, EPI_ISL_933005, EPI_ISL_933006, EPI_ISL_933007, EPI_ISL_933008, EPI_ISL_933009, EPI_ISL_933010, EPI_ISL_933011, EPI_ISL_933012, EPI_ISL_933013, EPI_ISL_933014, EPI_ISL_933015, EPI_ISL_933016, EPI_ISL_933017, EPI_ISL_933018, EPI_ISL_933019, EPI_ISL_933020, EPI_ISL_933021, EPI_ISL_933022, EPI_ISL_933023, EPI_ISL_933024, EPI_ISL_933025, EPI_ISL_933026, EPI_ISL_933027, EPI_ISL_933028, EPI_ISL_933029, EPI_ISL_933030, EPI_ISL_933031, EPI_ISL_933032, EPI_ISL_933033, EPI_ISL_933034, EPI_ISL_933035, EPI_ISL_933036, EPI_ISL_933037, EPI_ISL_933038, EPI_ISL_933039, EPI_ISL_933040, EPI_ISL_933041, EPI_ISL_933042, EPI_ISL_933043, EPI_ISL_933044, EPI_ISL_933045, EPI_ISL_933046, EPI_ISL_933047, EPI_ISL_933048, EPI_ISL_933049, EPI_ISL_933050, EPI_ISL_933051, EPI_ISL_933052, EPI_ISL_933053, EPI_ISL_933054, EPI_ISL_933055, EPI_ISL_933056, EPI_ISL_933057, EPI_ISL_933058, EPI_ISL_933059, EPI_ISL_933060, EPI_ISL_933061, EPI_ISL_933062, EPI_ISL_933063, EPI_ISL_933064, EPI_ISL_933065, EPI_ISL_                                                                                                                                                                                                                                                                                                                                                                                                                                                                                                                                                                                                                                                                                                                                                                                                                                                                                                                                                                                                                                                                                                                                                                                                                                                                                                                                                                                                                                                                                                                                                                                                                                                                                                                                                                                                                                                                                                                                                                                                                                                                                                                                                                                                                                                                                                                                                                                                                                                                                                                                                                                                                                                                                                                                                                                                                                                                                                                                                                                                                                                                                                                                                                                                                                                                                                                                                                                                                                                                                                                                                                                                                                                                                                                                                                                                                                                                                                                                                                                                                                                                                                                                                                                                                                                                                                                                                                                                                                                                                                                                                                                                                                                                                                                                                                                                                                                                                                                                                                                                                                                                                                                                                                                                                                                                                                                                                                                                                                                                                                                                                                                                                                                                                                                                                                                                                                                                                                                                                                                                                                                                                                                                                                                                                                                                                                                                                                                                                                                                                                                                                                                                                                                                                                                                                                                                                                                                                                                                                                                                                                                                                                                                                                                                                                                                                                                                                                                                                                                                                                                                                                                                                                                                                                                                                                                                                                                                                                                                                                                                                                                                                                                                                                                                                                                                                                                                                                                                                                                                                                                                                                                                                                                       |                                                                                                                                                                                                                     |                                                                            |                                                                                                                                                                                                                                                                                                                                                         |

|                                                                                                                                                                                                                                                                                                                                                                                                                                                                                                                                                                                                                                                                                                                                                                                                                                                                                                                                                                                                                                                                                                                                                                                                                                                                                                                                                                                                                                                                                                                                                                                                                                                                                                                                                                                                                                                                                                                                                                                                                                                                                                                                                                                                                                                                                                                                                                                                                                                                                                                                                                                                                                                                                                                                                                                                                                                                                                                                                                                                                                                                                                                                                                                                                                                                                                                                                                                                                                                                                                                                                                                                                                                                                                                                                                                                                                                                                                                                                                                                                                                                                                                                                                                                                                                                                                                                                                                                                                                                                                                                                                                                                                                                                                                                                                                                                     |                                 |                                                                            |                                                                                                                                                                                                                                                                                                   |  |
|---------------------------------------------------------------------------------------------------------------------------------------------------------------------------------------------------------------------------------------------------------------------------------------------------------------------------------------------------------------------------------------------------------------------------------------------------------------------------------------------------------------------------------------------------------------------------------------------------------------------------------------------------------------------------------------------------------------------------------------------------------------------------------------------------------------------------------------------------------------------------------------------------------------------------------------------------------------------------------------------------------------------------------------------------------------------------------------------------------------------------------------------------------------------------------------------------------------------------------------------------------------------------------------------------------------------------------------------------------------------------------------------------------------------------------------------------------------------------------------------------------------------------------------------------------------------------------------------------------------------------------------------------------------------------------------------------------------------------------------------------------------------------------------------------------------------------------------------------------------------------------------------------------------------------------------------------------------------------------------------------------------------------------------------------------------------------------------------------------------------------------------------------------------------------------------------------------------------------------------------------------------------------------------------------------------------------------------------------------------------------------------------------------------------------------------------------------------------------------------------------------------------------------------------------------------------------------------------------------------------------------------------------------------------------------------------------------------------------------------------------------------------------------------------------------------------------------------------------------------------------------------------------------------------------------------------------------------------------------------------------------------------------------------------------------------------------------------------------------------------------------------------------------------------------------------------------------------------------------------------------------------------------------------------------------------------------------------------------------------------------------------------------------------------------------------------------------------------------------------------------------------------------------------------------------------------------------------------------------------------------------------------------------------------------------------------------------------------------------------------------------------------------------------------------------------------------------------------------------------------------------------------------------------------------------------------------------------------------------------------------------------------------------------------------------------------------------------------------------------------------------------------------------------------------------------------------------------------------------------------------------------------------------------------------------------------------------------------------------------------------------------------------------------------------------------------------------------------------------------------------------------------------------------------------------------------------------------------------------------------------------------------------------------------------------------------------------------------------------------------------------------------------------------------------------------------|---------------------------------|----------------------------------------------------------------------------|---------------------------------------------------------------------------------------------------------------------------------------------------------------------------------------------------------------------------------------------------------------------------------------------------|--|
| EPI_ISL_937792, EPI_ISL_937795, EPI_ISL_937796, EPI_ISL_937797, EPI_ISL_937801, EPI_ISL_937804, EPI_ISL_937833, EPI_ISL_937834, EPI_ISL_937835, EPI_ISL_937836, EPI_ISL_937837, EPI_ISL_937838, EPI_ISL_937841, EPI_ISL_937842, EPI_ISL_937844, EPI_ISL_937845, EPI_ISL_937846, EPI_ISL_937847, EPI_ISL_937848, EPI_ISL_937851, EPI_ISL_937855, EPI_ISL_937856, EPI_ISL_937857, EPI_ISL_937858, EPI_ISL_937859, EPI_ISL_937861, EPI_ISL_937866, EPI_ISL_937868, EPI_ISL_937869, EPI_ISL_937870, EPI_ISL_937871, EPI_ISL_937876, EPI_ISL_937878, EPI_ISL_937879, EPI_ISL_937880, EPI_ISL_937882, EPI_ISL_937884, EPI_ISL_937885                                                                                                                                                                                                                                                                                                                                                                                                                                                                                                                                                                                                                                                                                                                                                                                                                                                                                                                                                                                                                                                                                                                                                                                                                                                                                                                                                                                                                                                                                                                                                                                                                                                                                                                                                                                                                                                                                                                                                                                                                                                                                                                                                                                                                                                                                                                                                                                                                                                                                                                                                                                                                                                                                                                                                                                                                                                                                                                                                                                                                                                                                                                                                                                                                                                                                                                                                                                                                                                                                                                                                                                                                                                                                                                                                                                                                                                                                                                                                                                                                                                                                                                                                                                      |                                 |                                                                            |                                                                                                                                                                                                                                                                                                   |  |
| see above                                                                                                                                                                                                                                                                                                                                                                                                                                                                                                                                                                                                                                                                                                                                                                                                                                                                                                                                                                                                                                                                                                                                                                                                                                                                                                                                                                                                                                                                                                                                                                                                                                                                                                                                                                                                                                                                                                                                                                                                                                                                                                                                                                                                                                                                                                                                                                                                                                                                                                                                                                                                                                                                                                                                                                                                                                                                                                                                                                                                                                                                                                                                                                                                                                                                                                                                                                                                                                                                                                                                                                                                                                                                                                                                                                                                                                                                                                                                                                                                                                                                                                                                                                                                                                                                                                                                                                                                                                                                                                                                                                                                                                                                                                                                                                                                           | Lighthouse Lab in Alderley Park | Wellcome Sanger Institute for the COVID-19 Genomics UK (COG-UK) Consortium | Jacquelyn Wynn, Mairead Hyland, The Lighthouse Lab in Alderley Park and Alex Alderton, Roberto Amato, Sonia Goncalves, Ewan Harrison, David K. Jackson, Ian Johnston, Dominic Kwiatkowski, Cordelia Langford, John Sillitoe on behalf of the Wellcome Sanger Institute COVID-19 Surveillance Team |  |
| EPI_ISL_938579, EPI_ISL_938580, EPI_ISL_938582, EPI_ISL_938583, EPI_ISL_938584, EPI_ISL_938585, EPI_ISL_938586, EPI_ISL_938588, EPI_ISL_938589, EPI_ISL_938601, EPI_ISL_938602, EPI_ISL_938603, EPI_ISL_938604, EPI_ISL_938605, EPI_ISL_938606, EPI_ISL_938607, EPI_ISL_938608, EPI_ISL_938609, EPI_ISL_938611, EPI_ISL_938612, EPI_ISL_938613, EPI_ISL_938614, EPI_ISL_938615, EPI_ISL_938616, EPI_ISL_938617, EPI_ISL_938618, EPI_ISL_938620, EPI_ISL_938621, EPI_ISL_938622, EPI_ISL_938623, EPI_ISL_938624, EPI_ISL_938625, EPI_ISL_938626, EPI_ISL_938627, EPI_ISL_938628, EPI_ISL_938629, EPI_ISL_938634, EPI_ISL_938635, EPI_ISL_938636, EPI_ISL_938639, EPI_ISL_938640, EPI_ISL_938641, EPI_ISL_938642, EPI_ISL_938644, EPI_ISL_938646, EPI_ISL_938647, EPI_ISL_938648, EPI_ISL_938649, EPI_ISL_938651, EPI_ISL_938652, EPI_ISL_938653, EPI_ISL_938654, EPI_ISL_938655, EPI_ISL_938656, EPI_ISL_938657, EPI_ISL_938658, EPI_ISL_938659, EPI_ISL_938660, EPI_ISL_938661, EPI_ISL_938662, EPI_ISL_938663, EPI_ISL_938664, EPI_ISL_938665, EPI_ISL_938666, EPI_ISL_938667, EPI_ISL_938668, EPI_ISL_938669, EPI_ISL_938670, EPI_ISL_938671, EPI_ISL_938672, EPI_ISL_938673, EPI_ISL_938674, EPI_ISL_938675, EPI_ISL_938676, EPI_ISL_938677, EPI_ISL_938678, EPI_ISL_938679, EPI_ISL_938680, EPI_ISL_938681, EPI_ISL_938682, EPI_ISL_938683, EPI_ISL_938684, EPI_ISL_938685, EPI_ISL_938686, EPI_ISL_938687, EPI_ISL_938688, EPI_ISL_938689, EPI_ISL_938690, EPI_ISL_938691, EPI_ISL_938692, EPI_ISL_938693, EPI_ISL_938694, EPI_ISL_938695, EPI_ISL_938696, EPI_ISL_938697, EPI_ISL_938698, EPI_ISL_938699, EPI_ISL_938700, EPI_ISL_938701, EPI_ISL_938702, EPI_ISL_938703, EPI_ISL_938704, EPI_ISL_938705, EPI_ISL_938706, EPI_ISL_938707, EPI_ISL_938708, EPI_ISL_938709, EPI_ISL_938710, EPI_ISL_938711, EPI_ISL_938712, EPI_ISL_938713, EPI_ISL_938714, EPI_ISL_938715, EPI_ISL_938716, EPI_ISL_938717, EPI_ISL_938718, EPI_ISL_938719, EPI_ISL_938720, EPI_ISL_938721, EPI_ISL_938722, EPI_ISL_938723, EPI_ISL_938724, EPI_ISL_938725, EPI_ISL_938726, EPI_ISL_938727, EPI_ISL_938728, EPI_ISL_938729, EPI_ISL_938730, EPI_ISL_938731, EPI_ISL_938732, EPI_ISL_938733, EPI_ISL_938734, EPI_ISL_938735, EPI_ISL_938736, EPI_ISL_938737, EPI_ISL_938738, EPI_ISL_938739, EPI_ISL_938740, EPI_ISL_938741, EPI_ISL_938742, EPI_ISL_938743, EPI_ISL_938744, EPI_ISL_938745, EPI_ISL_938746, EPI_ISL_938747, EPI_ISL_938748, EPI_ISL_938749, EPI_ISL_938750, EPI_ISL_938751, EPI_ISL_938752, EPI_ISL_938753, EPI_ISL_938754, EPI_ISL_938755, EPI_ISL_938756, EPI_ISL_938757, EPI_ISL_938758, EPI_ISL_938759, EPI_ISL_938760, EPI_ISL_938761, EPI_ISL_938762, EPI_ISL_938763, EPI_ISL_938764, EPI_ISL_938765, EPI_ISL_938766, EPI_ISL_938767, EPI_ISL_938768, EPI_ISL_938769, EPI_ISL_938770, EPI_ISL_938771, EPI_ISL_938772, EPI_ISL_938773, EPI_ISL_938774, EPI_ISL_938775, EPI_ISL_938776, EPI_ISL_938777, EPI_ISL_938778, EPI_ISL_938779, EPI_ISL_938780, EPI_ISL_938781, EPI_ISL_938782, EPI_ISL_938783, EPI_ISL_938784, EPI_ISL_938785, EPI_ISL_938786, EPI_ISL_938787, EPI_ISL_938788, EPI_ISL_938789, EPI_ISL_938790, EPI_ISL_938791, EPI_ISL_938792, EPI_ISL_938793, EPI_ISL_938794, EPI_ISL_938795, EPI_ISL_938796, EPI_ISL_938797, EPI_ISL_938798, EPI_ISL_938799, EPI_ISL_938800, EPI_ISL_938801, EPI_ISL_938802, EPI_ISL_938803, EPI_ISL_938804, EPI_ISL_938805, EPI_ISL_938806, EPI_ISL_938807, EPI_ISL_938808, EPI_ISL_938809, EPI_ISL_938810, EPI_ISL_938811, EPI_ISL_938812, EPI_ISL_938813, EPI_ISL_938814, EPI_ISL_938815, EPI_ISL_938816, EPI_ISL_938817, EPI_ISL_938818, EPI_ISL_938819, EPI_ISL_938820, EPI_ISL_938821, EPI_ISL_938822, EPI_ISL_938823, EPI_ISL_938824, EPI_ISL_938825, EPI_ISL_938826, EPI_ISL_938827, EPI_ISL_938828, EPI_ISL_938829, EPI_ISL_938830, EPI_ISL_938831, EPI_ISL_938832, EPI_ISL_938833, EPI_ISL_938834, EPI_ISL_938835, EPI_ISL_938836, EPI_ISL_938837, EPI_ISL_938838, EPI_ISL_938839, EPI_ISL_938840, EPI_ISL_938841, EPI_ISL_938842, EPI_ISL_938843, EPI_ISL_938844, EPI_ISL_938845, EPI_ISL_938846, EPI_ISL_938847, EPI_ISL_938848, EPI_ISL_938849, EPI_ISL_938850, EPI_ISL_938851, EPI_ISL_938852, EPI_ISL_938853, EPI_ISL_938854, EPI_ISL_938855, EPI_ISL_938856, EPI_ISL_938857, EPI_ISL_938858, EPI_ISL_938859, EPI_ISL_938860, EPI_ISL_938861, EPI_ISL_938862, EPI_ISL_938863, EPI_ISL_938864, EPI_ISL_938865, EPI_ISL_938866, EPI_ISL_938867, EPI_ISL_938868, EPI_ISL_938869, EPI_ISL_938870, EPI_ISL_938871, EPI_ISL_938872, EPI_ISL_938873, EPI_ISL_938874, EPI_ISL_938875, EPI_ISL_938876, EPI_ISL_938877, EPI_ISL_938878, EPI_ISL_938879, EPI_ISL_938880, EPI_ISL_938881, EPI_ISL_938882, EPI_ISL_938883, EPI_ISL_938884, EPI_ISL_938885, EPI_ISL_938886, EPI_ISL_938887, EPI_ISL_938888, EPI_ISL_938889, EPI_ISL_938890, EPI_ISL_938891, EPI |                                 |                                                                            |                                                                                                                                                                                                                                                                                                   |  |

[illegible]



[illegible]

[illegible]

[illegible]

[illegible]

[illegible]

[illegible]

[illegible]

[illegible]



[illegible]

[illegible]

|                                                                                                                                                                                                                                                                                                                                                                                                                                                                                                                                                                                                                                                                                                                                                                                                                                                                                                                                                                                                                                                                                                                                                                                                                                                                                                                                                                                                                                                                                                                                                                                                                                                                                                                                                                                                                                                                                                                                                                                                                                                                                                                                                                                                                                                                                                                                                                                                                                                                                                                                                                                |                                                                                                                                                                         |                                                                            | Team                                                                                                                                                                                                                                                                                                                                                                                                                                    |
|--------------------------------------------------------------------------------------------------------------------------------------------------------------------------------------------------------------------------------------------------------------------------------------------------------------------------------------------------------------------------------------------------------------------------------------------------------------------------------------------------------------------------------------------------------------------------------------------------------------------------------------------------------------------------------------------------------------------------------------------------------------------------------------------------------------------------------------------------------------------------------------------------------------------------------------------------------------------------------------------------------------------------------------------------------------------------------------------------------------------------------------------------------------------------------------------------------------------------------------------------------------------------------------------------------------------------------------------------------------------------------------------------------------------------------------------------------------------------------------------------------------------------------------------------------------------------------------------------------------------------------------------------------------------------------------------------------------------------------------------------------------------------------------------------------------------------------------------------------------------------------------------------------------------------------------------------------------------------------------------------------------------------------------------------------------------------------------------------------------------------------------------------------------------------------------------------------------------------------------------------------------------------------------------------------------------------------------------------------------------------------------------------------------------------------------------------------------------------------------------------------------------------------------------------------------------------------|-------------------------------------------------------------------------------------------------------------------------------------------------------------------------|----------------------------------------------------------------------------|-----------------------------------------------------------------------------------------------------------------------------------------------------------------------------------------------------------------------------------------------------------------------------------------------------------------------------------------------------------------------------------------------------------------------------------------|
| EPI_ISL_948389, EPI_ISL_948390                                                                                                                                                                                                                                                                                                                                                                                                                                                                                                                                                                                                                                                                                                                                                                                                                                                                                                                                                                                                                                                                                                                                                                                                                                                                                                                                                                                                                                                                                                                                                                                                                                                                                                                                                                                                                                                                                                                                                                                                                                                                                                                                                                                                                                                                                                                                                                                                                                                                                                                                                 |                                                                                                                                                                         |                                                                            |                                                                                                                                                                                                                                                                                                                                                                                                                                         |
| EPI_ISL_948391, EPI_ISL_948392, EPI_ISL_948393                                                                                                                                                                                                                                                                                                                                                                                                                                                                                                                                                                                                                                                                                                                                                                                                                                                                                                                                                                                                                                                                                                                                                                                                                                                                                                                                                                                                                                                                                                                                                                                                                                                                                                                                                                                                                                                                                                                                                                                                                                                                                                                                                                                                                                                                                                                                                                                                                                                                                                                                 | Lighthouse Lab in Cambridge                                                                                                                                             | Wellcome Sanger Institute for the COVID-19 Genomics UK (COG-UK) Consortium | Rob Howes, The Lighthouse Lab in Cambridge and Alex Alderton, Roberto Amato, Sonia Goncalves, Ewan Harrison, David K. Jackson, Ian Johnston, Dominic Kwiatkowski, Cordelia Langford, John Sillitoe on behalf of the Wellcome Sanger Institute COVID-19 Surveillance Team                                                                                                                                                                |
| EPI_ISL_948394                                                                                                                                                                                                                                                                                                                                                                                                                                                                                                                                                                                                                                                                                                                                                                                                                                                                                                                                                                                                                                                                                                                                                                                                                                                                                                                                                                                                                                                                                                                                                                                                                                                                                                                                                                                                                                                                                                                                                                                                                                                                                                                                                                                                                                                                                                                                                                                                                                                                                                                                                                 | Lighthouse Lab in Glasgow                                                                                                                                               | Wellcome Sanger Institute for the COVID-19 Genomics UK (COG-UK) Consortium | Harper VanSteenhouse, Yumi Kasai, David Gray, Carol Clugston, Anna Dominiczak and Alex Alderton, Roberto Amato, Sonia Goncalves, Ewan Harrison, David K. Jackson, Ian Johnston, Dominic Kwiatkowski, Cordelia Langford, John Sillitoe on behalf of the Wellcome Sanger Institute COVID-19 Surveillance Team                                                                                                                             |
| EPI_ISL_948395, EPI_ISL_948396, EPI_ISL_948397                                                                                                                                                                                                                                                                                                                                                                                                                                                                                                                                                                                                                                                                                                                                                                                                                                                                                                                                                                                                                                                                                                                                                                                                                                                                                                                                                                                                                                                                                                                                                                                                                                                                                                                                                                                                                                                                                                                                                                                                                                                                                                                                                                                                                                                                                                                                                                                                                                                                                                                                 | Lighthouse Lab in Cambridge                                                                                                                                             | Wellcome Sanger Institute for the COVID-19 Genomics UK (COG-UK) Consortium | Rob Howes, The Lighthouse Lab in Cambridge and Alex Alderton, Roberto Amato, Sonia Goncalves, Ewan Harrison, David K. Jackson, Ian Johnston, Dominic Kwiatkowski, Cordelia Langford, John Sillitoe on behalf of the Wellcome Sanger Institute COVID-19 Surveillance Team                                                                                                                                                                |
| EPI_ISL_948398, EPI_ISL_948399, EPI_ISL_948400, EPI_ISL_948401                                                                                                                                                                                                                                                                                                                                                                                                                                                                                                                                                                                                                                                                                                                                                                                                                                                                                                                                                                                                                                                                                                                                                                                                                                                                                                                                                                                                                                                                                                                                                                                                                                                                                                                                                                                                                                                                                                                                                                                                                                                                                                                                                                                                                                                                                                                                                                                                                                                                                                                 | Lighthouse Lab in Glasgow                                                                                                                                               | Wellcome Sanger Institute for the COVID-19 Genomics UK (COG-UK) Consortium | Harper VanSteenhouse, Yumi Kasai, David Gray, Carol Clugston, Anna Dominiczak and Alex Alderton, Roberto Amato, Sonia Goncalves, Ewan Harrison, David K. Jackson, Ian Johnston, Dominic Kwiatkowski, Cordelia Langford, John Sillitoe on behalf of the Wellcome Sanger Institute COVID-19 Surveillance Team                                                                                                                             |
| EPI_ISL_948402                                                                                                                                                                                                                                                                                                                                                                                                                                                                                                                                                                                                                                                                                                                                                                                                                                                                                                                                                                                                                                                                                                                                                                                                                                                                                                                                                                                                                                                                                                                                                                                                                                                                                                                                                                                                                                                                                                                                                                                                                                                                                                                                                                                                                                                                                                                                                                                                                                                                                                                                                                 | Lighthouse Lab in Cambridge                                                                                                                                             | Wellcome Sanger Institute for the COVID-19 Genomics UK (COG-UK) Consortium | Rob Howes, The Lighthouse Lab in Cambridge and Alex Alderton, Roberto Amato, Sonia Goncalves, Ewan Harrison, David K. Jackson, Ian Johnston, Dominic Kwiatkowski, Cordelia Langford, John Sillitoe on behalf of the Wellcome Sanger Institute COVID-19 Surveillance Team                                                                                                                                                                |
| EPI_ISL_948403, EPI_ISL_948404, EPI_ISL_948405, EPI_ISL_948406                                                                                                                                                                                                                                                                                                                                                                                                                                                                                                                                                                                                                                                                                                                                                                                                                                                                                                                                                                                                                                                                                                                                                                                                                                                                                                                                                                                                                                                                                                                                                                                                                                                                                                                                                                                                                                                                                                                                                                                                                                                                                                                                                                                                                                                                                                                                                                                                                                                                                                                 | Lighthouse Lab in Glasgow                                                                                                                                               | Wellcome Sanger Institute for the COVID-19 Genomics UK (COG-UK) Consortium | Harper VanSteenhouse, Yumi Kasai, David Gray, Carol Clugston, Anna Dominiczak and Alex Alderton, Roberto Amato, Sonia Goncalves, Ewan Harrison, David K. Jackson, Ian Johnston, Dominic Kwiatkowski, Cordelia Langford, John Sillitoe on behalf of the Wellcome Sanger Institute COVID-19 Surveillance Team                                                                                                                             |
| EPI_ISL_948408                                                                                                                                                                                                                                                                                                                                                                                                                                                                                                                                                                                                                                                                                                                                                                                                                                                                                                                                                                                                                                                                                                                                                                                                                                                                                                                                                                                                                                                                                                                                                                                                                                                                                                                                                                                                                                                                                                                                                                                                                                                                                                                                                                                                                                                                                                                                                                                                                                                                                                                                                                 | Lighthouse Lab in Cambridge                                                                                                                                             | Wellcome Sanger Institute for the COVID-19 Genomics UK (COG-UK) Consortium | Rob Howes, The Lighthouse Lab in Cambridge and Alex Alderton, Roberto Amato, Sonia Goncalves, Ewan Harrison, David K. Jackson, Ian Johnston, Dominic Kwiatkowski, Cordelia Langford, John Sillitoe on behalf of the Wellcome Sanger Institute COVID-19 Surveillance Team                                                                                                                                                                |
| EPI_ISL_948409, EPI_ISL_948410, EPI_ISL_948411                                                                                                                                                                                                                                                                                                                                                                                                                                                                                                                                                                                                                                                                                                                                                                                                                                                                                                                                                                                                                                                                                                                                                                                                                                                                                                                                                                                                                                                                                                                                                                                                                                                                                                                                                                                                                                                                                                                                                                                                                                                                                                                                                                                                                                                                                                                                                                                                                                                                                                                                 | Lighthouse Lab in Glasgow                                                                                                                                               | Wellcome Sanger Institute for the COVID-19 Genomics UK (COG-UK) Consortium | Harper VanSteenhouse, Yumi Kasai, David Gray, Carol Clugston, Anna Dominiczak and Alex Alderton, Roberto Amato, Sonia Goncalves, Ewan Harrison, David K. Jackson, Ian Johnston, Dominic Kwiatkowski, Cordelia Langford, John Sillitoe on behalf of the Wellcome Sanger Institute COVID-19 Surveillance Team                                                                                                                             |
| EPI_ISL_948412, EPI_ISL_948413, EPI_ISL_948414                                                                                                                                                                                                                                                                                                                                                                                                                                                                                                                                                                                                                                                                                                                                                                                                                                                                                                                                                                                                                                                                                                                                                                                                                                                                                                                                                                                                                                                                                                                                                                                                                                                                                                                                                                                                                                                                                                                                                                                                                                                                                                                                                                                                                                                                                                                                                                                                                                                                                                                                 | Lighthouse Lab in Cambridge                                                                                                                                             | Wellcome Sanger Institute for the COVID-19 Genomics UK (COG-UK) Consortium | Rob Howes, The Lighthouse Lab in Cambridge and Alex Alderton, Roberto Amato, Sonia Goncalves, Ewan Harrison, David K. Jackson, Ian Johnston, Dominic Kwiatkowski, Cordelia Langford, John Sillitoe on behalf of the Wellcome Sanger Institute COVID-19 Surveillance Team                                                                                                                                                                |
| EPI_ISL_948415, EPI_ISL_948416, EPI_ISL_948417, EPI_ISL_948418, EPI_ISL_948419                                                                                                                                                                                                                                                                                                                                                                                                                                                                                                                                                                                                                                                                                                                                                                                                                                                                                                                                                                                                                                                                                                                                                                                                                                                                                                                                                                                                                                                                                                                                                                                                                                                                                                                                                                                                                                                                                                                                                                                                                                                                                                                                                                                                                                                                                                                                                                                                                                                                                                 | Lighthouse Lab in Glasgow                                                                                                                                               | Wellcome Sanger Institute for the COVID-19 Genomics UK (COG-UK) Consortium | Harper VanSteenhouse, Yumi Kasai, David Gray, Carol Clugston, Anna Dominiczak and Alex Alderton, Roberto Amato, Sonia Goncalves, Ewan Harrison, David K. Jackson, Ian Johnston, Dominic Kwiatkowski, Cordelia Langford, John Sillitoe on behalf of the Wellcome Sanger Institute COVID-19 Surveillance Team                                                                                                                             |
| EPI_ISL_948420, EPI_ISL_948421, EPI_ISL_948422, EPI_ISL_948423, EPI_ISL_948424                                                                                                                                                                                                                                                                                                                                                                                                                                                                                                                                                                                                                                                                                                                                                                                                                                                                                                                                                                                                                                                                                                                                                                                                                                                                                                                                                                                                                                                                                                                                                                                                                                                                                                                                                                                                                                                                                                                                                                                                                                                                                                                                                                                                                                                                                                                                                                                                                                                                                                 | Lighthouse Lab in Cambridge                                                                                                                                             | Wellcome Sanger Institute for the COVID-19 Genomics UK (COG-UK) Consortium | Rob Howes, The Lighthouse Lab in Cambridge and Alex Alderton, Roberto Amato, Sonia Goncalves, Ewan Harrison, David K. Jackson, Ian Johnston, Dominic Kwiatkowski, Cordelia Langford, John Sillitoe on behalf of the Wellcome Sanger Institute COVID-19 Surveillance Team                                                                                                                                                                |
| EPI_ISL_948425, EPI_ISL_948426, EPI_ISL_948427, EPI_ISL_948428, EPI_ISL_948429, EPI_ISL_948430                                                                                                                                                                                                                                                                                                                                                                                                                                                                                                                                                                                                                                                                                                                                                                                                                                                                                                                                                                                                                                                                                                                                                                                                                                                                                                                                                                                                                                                                                                                                                                                                                                                                                                                                                                                                                                                                                                                                                                                                                                                                                                                                                                                                                                                                                                                                                                                                                                                                                 | Lighthouse Lab in Glasgow                                                                                                                                               | Wellcome Sanger Institute for the COVID-19 Genomics UK (COG-UK) Consortium | Harper VanSteenhouse, Yumi Kasai, David Gray, Carol Clugston, Anna Dominiczak and Alex Alderton, Roberto Amato, Sonia Goncalves, Ewan Harrison, David K. Jackson, Ian Johnston, Dominic Kwiatkowski, Cordelia Langford, John Sillitoe on behalf of the Wellcome Sanger Institute COVID-19 Surveillance Team                                                                                                                             |
| EPI_ISL_948431, EPI_ISL_948433, EPI_ISL_948434, EPI_ISL_948435                                                                                                                                                                                                                                                                                                                                                                                                                                                                                                                                                                                                                                                                                                                                                                                                                                                                                                                                                                                                                                                                                                                                                                                                                                                                                                                                                                                                                                                                                                                                                                                                                                                                                                                                                                                                                                                                                                                                                                                                                                                                                                                                                                                                                                                                                                                                                                                                                                                                                                                 | Lighthouse Lab in Cambridge                                                                                                                                             | Wellcome Sanger Institute for the COVID-19 Genomics UK (COG-UK) Consortium | Rob Howes, The Lighthouse Lab in Cambridge and Alex Alderton, Roberto Amato, Sonia Goncalves, Ewan Harrison, David K. Jackson, Ian Johnston, Dominic Kwiatkowski, Cordelia Langford, John Sillitoe on behalf of the Wellcome Sanger Institute COVID-19 Surveillance Team                                                                                                                                                                |
| EPI_ISL_948436                                                                                                                                                                                                                                                                                                                                                                                                                                                                                                                                                                                                                                                                                                                                                                                                                                                                                                                                                                                                                                                                                                                                                                                                                                                                                                                                                                                                                                                                                                                                                                                                                                                                                                                                                                                                                                                                                                                                                                                                                                                                                                                                                                                                                                                                                                                                                                                                                                                                                                                                                                 | Lighthouse Lab in Glasgow                                                                                                                                               | Wellcome Sanger Institute for the COVID-19 Genomics UK (COG-UK) Consortium | Harper VanSteenhouse, Yumi Kasai, David Gray, Carol Clugston, Anna Dominiczak and Alex Alderton, Roberto Amato, Sonia Goncalves, Ewan Harrison, David K. Jackson, Ian Johnston, Dominic Kwiatkowski, Cordelia Langford, John Sillitoe on behalf of the Wellcome Sanger Institute COVID-19 Surveillance Team                                                                                                                             |
| EPI_ISL_948437                                                                                                                                                                                                                                                                                                                                                                                                                                                                                                                                                                                                                                                                                                                                                                                                                                                                                                                                                                                                                                                                                                                                                                                                                                                                                                                                                                                                                                                                                                                                                                                                                                                                                                                                                                                                                                                                                                                                                                                                                                                                                                                                                                                                                                                                                                                                                                                                                                                                                                                                                                 | Lighthouse Lab in Cambridge                                                                                                                                             | Wellcome Sanger Institute for the COVID-19 Genomics UK (COG-UK) Consortium | Rob Howes, The Lighthouse Lab in Cambridge and Alex Alderton, Roberto Amato, Sonia Goncalves, Ewan Harrison, David K. Jackson, Ian Johnston, Dominic Kwiatkowski, Cordelia Langford, John Sillitoe on behalf of the Wellcome Sanger Institute COVID-19 Surveillance Team                                                                                                                                                                |
| EPI_ISL_948438, EPI_ISL_948439, EPI_ISL_948440                                                                                                                                                                                                                                                                                                                                                                                                                                                                                                                                                                                                                                                                                                                                                                                                                                                                                                                                                                                                                                                                                                                                                                                                                                                                                                                                                                                                                                                                                                                                                                                                                                                                                                                                                                                                                                                                                                                                                                                                                                                                                                                                                                                                                                                                                                                                                                                                                                                                                                                                 | Lighthouse Lab in Glasgow                                                                                                                                               | Wellcome Sanger Institute for the COVID-19 Genomics UK (COG-UK) Consortium | Harper VanSteenhouse, Yumi Kasai, David Gray, Carol Clugston, Anna Dominiczak and Alex Alderton, Roberto Amato, Sonia Goncalves, Ewan Harrison, David K. Jackson, Ian Johnston, Dominic Kwiatkowski, Cordelia Langford, John Sillitoe on behalf of the Wellcome Sanger Institute COVID-19 Surveillance Team                                                                                                                             |
| EPI_ISL_948441, EPI_ISL_948442                                                                                                                                                                                                                                                                                                                                                                                                                                                                                                                                                                                                                                                                                                                                                                                                                                                                                                                                                                                                                                                                                                                                                                                                                                                                                                                                                                                                                                                                                                                                                                                                                                                                                                                                                                                                                                                                                                                                                                                                                                                                                                                                                                                                                                                                                                                                                                                                                                                                                                                                                 | Lighthouse Lab in Cambridge                                                                                                                                             | Wellcome Sanger Institute for the COVID-19 Genomics UK (COG-UK) Consortium | Rob Howes, The Lighthouse Lab in Cambridge and Alex Alderton, Roberto Amato, Sonia Goncalves, Ewan Harrison, David K. Jackson, Ian Johnston, Dominic Kwiatkowski, Cordelia Langford, John Sillitoe on behalf of the Wellcome Sanger Institute COVID-19 Surveillance Team                                                                                                                                                                |
| EPI_ISL_948443, EPI_ISL_948444                                                                                                                                                                                                                                                                                                                                                                                                                                                                                                                                                                                                                                                                                                                                                                                                                                                                                                                                                                                                                                                                                                                                                                                                                                                                                                                                                                                                                                                                                                                                                                                                                                                                                                                                                                                                                                                                                                                                                                                                                                                                                                                                                                                                                                                                                                                                                                                                                                                                                                                                                 | Lighthouse Lab in Glasgow                                                                                                                                               | Wellcome Sanger Institute for the COVID-19 Genomics UK (COG-UK) Consortium | Harper VanSteenhouse, Yumi Kasai, David Gray, Carol Clugston, Anna Dominiczak and Alex Alderton, Roberto Amato, Sonia Goncalves, Ewan Harrison, David K. Jackson, Ian Johnston, Dominic Kwiatkowski, Cordelia Langford, John Sillitoe on behalf of the Wellcome Sanger Institute COVID-19 Surveillance Team                                                                                                                             |
| EPI_ISL_948445                                                                                                                                                                                                                                                                                                                                                                                                                                                                                                                                                                                                                                                                                                                                                                                                                                                                                                                                                                                                                                                                                                                                                                                                                                                                                                                                                                                                                                                                                                                                                                                                                                                                                                                                                                                                                                                                                                                                                                                                                                                                                                                                                                                                                                                                                                                                                                                                                                                                                                                                                                 | Lighthouse Lab in Cambridge                                                                                                                                             | Wellcome Sanger Institute for the COVID-19 Genomics UK (COG-UK) Consortium | Rob Howes, The Lighthouse Lab in Cambridge and Alex Alderton, Roberto Amato, Sonia Goncalves, Ewan Harrison, David K. Jackson, Ian Johnston, Dominic Kwiatkowski, Cordelia Langford, John Sillitoe on behalf of the Wellcome Sanger Institute COVID-19 Surveillance Team                                                                                                                                                                |
| EPI_ISL_948446, EPI_ISL_948447, EPI_ISL_948448, EPI_ISL_948787, EPI_ISL_948788, EPI_ISL_948789, EPI_ISL_948790, EPI_ISL_948791, EPI_ISL_948792, EPI_ISL_948793, EPI_ISL_948794, EPI_ISL_948795, EPI_ISL_948796, EPI_ISL_948797, EPI_ISL_948798, EPI_ISL_948799, EPI_ISL_948800, EPI_ISL_948801, EPI_ISL_948802, EPI_ISL_948803, EPI_ISL_948804, EPI_ISL_948805, EPI_ISL_948806, EPI_ISL_948807, EPI_ISL_948808, EPI_ISL_948809, EPI_ISL_948810, EPI_ISL_948811, EPI_ISL_948812, EPI_ISL_948813, EPI_ISL_948814, EPI_ISL_948815, EPI_ISL_948816, EPI_ISL_948817, EPI_ISL_948818, EPI_ISL_948819, EPI_ISL_948820, EPI_ISL_948821, EPI_ISL_948822, EPI_ISL_948823, EPI_ISL_948824, EPI_ISL_948825, EPI_ISL_948826, EPI_ISL_948827, EPI_ISL_948828, EPI_ISL_948831, EPI_ISL_948832, EPI_ISL_948833, EPI_ISL_948835, EPI_ISL_948836, EPI_ISL_948837, EPI_ISL_948838, EPI_ISL_948839, EPI_ISL_948840, EPI_ISL_948841, EPI_ISL_948842, EPI_ISL_948843, EPI_ISL_948844, EPI_ISL_948846, EPI_ISL_948847, EPI_ISL_948849, EPI_ISL_948850, EPI_ISL_948851, EPI_ISL_948852, EPI_ISL_948853, EPI_ISL_948854, EPI_ISL_948855, EPI_ISL_948856, EPI_ISL_948857, EPI_ISL_948858, EPI_ISL_948859, EPI_ISL_948860, EPI_ISL_948861, EPI_ISL_948862, EPI_ISL_948863, EPI_ISL_948864, EPI_ISL_948865, EPI_ISL_948866, EPI_ISL_948867, EPI_ISL_948868, EPI_ISL_948869, EPI_ISL_948870, EPI_ISL_948871, EPI_ISL_948872, EPI_ISL_948873, EPI_ISL_948874, EPI_ISL_948875, EPI_ISL_948876, EPI_ISL_948877, EPI_ISL_948878, EPI_ISL_948879, EPI_ISL_948880, EPI_ISL_948881, EPI_ISL_948882, EPI_ISL_948883, EPI_ISL_948884, EPI_ISL_948885, EPI_ISL_948886, EPI_ISL_948887, EPI_ISL_948888, EPI_ISL_948889, EPI_ISL_948890, EPI_ISL_948891, EPI_ISL_948892, EPI_ISL_948893, EPI_ISL_948894, EPI_ISL_948895, EPI_ISL_948897, EPI_ISL_948898, EPI_ISL_948899, EPI_ISL_948900, EPI_ISL_948901, EPI_ISL_948902, EPI_ISL_948903, EPI_ISL_948904, EPI_ISL_948905, EPI_ISL_948906, EPI_ISL_948907, EPI_ISL_948908, EPI_ISL_948909, EPI_ISL_948910, EPI_ISL_948911, EPI_ISL_948912, EPI_ISL_948913, EPI_ISL_948914, EPI_ISL_948915, EPI_ISL_948916, EPI_ISL_948917, EPI_ISL_948918, EPI_ISL_948919, EPI_ISL_948920, EPI_ISL_948921, EPI_ISL_948922, EPI_ISL_948923, EPI_ISL_948924, EPI_ISL_948925, EPI_ISL_948926, EPI_ISL_948927, EPI_ISL_948928, EPI_ISL_948929, EPI_ISL_948930, EPI_ISL_948931, EPI_ISL_948932, EPI_ISL_948933, EPI_ISL_948934, EPI_ISL_948935, EPI_ISL_948936, EPI_ISL_948937, EPI_ISL_948938, EPI_ISL_948939, EPI_ISL_948940, EPI_ISL_948941, EPI_ISL_948942, EPI_ISL_948943, EPI_ISL_948944 | Lighthouse Lab in Glasgow                                                                                                                                               | Wellcome Sanger Institute for the COVID-19 Genomics UK (COG-UK) Consortium | Harper VanSteenhouse, Yumi Kasai, David Gray, Carol Clugston, Anna Dominiczak and Alex Alderton, Roberto Amato, Sonia Goncalves, Ewan Harrison, David K. Jackson, Ian Johnston, Dominic Kwiatkowski, Cordelia Langford, John Sillitoe on behalf of the Wellcome Sanger Institute COVID-19 Surveillance Team                                                                                                                             |
| see above                                                                                                                                                                                                                                                                                                                                                                                                                                                                                                                                                                                                                                                                                                                                                                                                                                                                                                                                                                                                                                                                                                                                                                                                                                                                                                                                                                                                                                                                                                                                                                                                                                                                                                                                                                                                                                                                                                                                                                                                                                                                                                                                                                                                                                                                                                                                                                                                                                                                                                                                                                      | Lighthouse Lab in Glasgow                                                                                                                                               | Wellcome Sanger Institute for the COVID-19 Genomics UK (COG-UK) Consortium | Harper VanSteenhouse, Yumi Kasai, David Gray, Carol Clugston, Anna Dominiczak and Alex Alderton, Roberto Amato, Sonia Goncalves, Ewan Harrison, David K. Jackson, Ian Johnston, Dominic Kwiatkowski, Cordelia Langford, John Sillitoe on behalf of the Wellcome Sanger Institute COVID-19 Surveillance Team                                                                                                                             |
| EPI_ISL_949410                                                                                                                                                                                                                                                                                                                                                                                                                                                                                                                                                                                                                                                                                                                                                                                                                                                                                                                                                                                                                                                                                                                                                                                                                                                                                                                                                                                                                                                                                                                                                                                                                                                                                                                                                                                                                                                                                                                                                                                                                                                                                                                                                                                                                                                                                                                                                                                                                                                                                                                                                                 | University of Birmingham                                                                                                                                                | COVID-19 Genomics UK (COG-UK) Consortium                                   | Institute of Microbiology, University of Birmingham: Claire McMurray, Joanne Stockton, Samuel Nicholls, Radoslaw Poplawski, Will Rowe, Josh Quick, Nicholas Loman, University of Birmingham Testing Laboratory: Celina M Whalley, Andrew Bosworth, Charlotte Poxon, Kasun Wanigasooriya, Oliver Pickles, Mike Kidd, Alex Richter, Andrew D Beggs PHE Heartlands Lab: Husam Osman, Andrew Bosworth, Queen Elizabeth Hospital: Anna Casey |
| EPI_ISL_949462, EPI_ISL_949463, EPI_ISL_949464, EPI_ISL_949465, EPI_ISL_949467, EPI_ISL_949468, EPI_ISL_949469, EPI_ISL_949473, EPI_ISL_949475, EPI_ISL_949476, EPI_ISL_949477, EPI_ISL_949524, EPI_ISL_949525, EPI_ISL_949526, EPI_ISL_949527, EPI_ISL_949528, EPI_ISL_949529, EPI_ISL_949530, EPI_ISL_949531, EPI_ISL_949532, EPI_ISL_949533, EPI_ISL_949534, EPI_ISL_949535, EPI_ISL_949536, EPI_ISL_949537, EPI_ISL_949538, EPI_ISL_949539, EPI_ISL_949540, EPI_ISL_949542, EPI_ISL_949544, EPI_ISL_949546, EPI_ISL_949548, EPI_ISL_949549, EPI_ISL_949550, EPI_ISL_949553, EPI_ISL_949554, EPI_ISL_949555, EPI_ISL_949556                                                                                                                                                                                                                                                                                                                                                                                                                                                                                                                                                                                                                                                                                                                                                                                                                                                                                                                                                                                                                                                                                                                                                                                                                                                                                                                                                                                                                                                                                                                                                                                                                                                                                                                                                                                                                                                                                                                                                 |                                                                                                                                                                         |                                                                            |                                                                                                                                                                                                                                                                                                                                                                                                                                         |
| see above                                                                                                                                                                                                                                                                                                                                                                                                                                                                                                                                                                                                                                                                                                                                                                                                                                                                                                                                                                                                                                                                                                                                                                                                                                                                                                                                                                                                                                                                                                                                                                                                                                                                                                                                                                                                                                                                                                                                                                                                                                                                                                                                                                                                                                                                                                                                                                                                                                                                                                                                                                      | Department of Pathology, University of Cambridge                                                                                                                        | COVID-19 Genomics UK (COG-UK) Consortium                                   | Aminu S. Jahun, Yasmin Chaudhry, Iliana Georgana, Myra Hosmillo, Rhys Izu, Martin D. Curran, Surendra Parmar, Ian Goodfellow                                                                                                                                                                                                                                                                                                            |
| EPI_ISL_949611, EPI_ISL_949615                                                                                                                                                                                                                                                                                                                                                                                                                                                                                                                                                                                                                                                                                                                                                                                                                                                                                                                                                                                                                                                                                                                                                                                                                                                                                                                                                                                                                                                                                                                                                                                                                                                                                                                                                                                                                                                                                                                                                                                                                                                                                                                                                                                                                                                                                                                                                                                                                                                                                                                                                 | West of Scotland Specialist Virology Centre, NHSGGC / MRC-University of Glasgow Centre for Virus Research                                                               | COVID-19 Genomics UK (COG-UK) Consortium                                   | Ana da Silva Filipe, Natasha Johnson, Kathy Smollett, Daniel Mair, Stephen Carmichael, Alice Broos, Lily Tong, Jenna Nichols, Kyriaki Nomikou; Sarah McDonald; Richard Orton, Joseph Hughes, Sreenu Vattipally, David L Robertson; Alasdair MacLean, Rory Gunson; Rachel Blacow, Guy Mollett, Kathy Li, James Shepherd, Antonia Ho, Emma Thomson                                                                                        |
| EPI_ISL_949645, EPI_ISL_949646                                                                                                                                                                                                                                                                                                                                                                                                                                                                                                                                                                                                                                                                                                                                                                                                                                                                                                                                                                                                                                                                                                                                                                                                                                                                                                                                                                                                                                                                                                                                                                                                                                                                                                                                                                                                                                                                                                                                                                                                                                                                                                                                                                                                                                                                                                                                                                                                                                                                                                                                                 | Virology Department, Royal Infirmary of Edinburgh, NHS Lothian / School of Biological Sciences, University of Edinburgh / Institute of Genetics and Molecular Medicine, | COVID-19 Genomics UK (COG-UK) Consortium                                   | McHugh M, Dewar R, Rooke S, Gallagher M, Balcaza C, O'Toole A, Scher E, Hill V, McCrone JT, Colquhoun R, Yu X, Jackson B, Rambaut A, Williams TC, Templeton K                                                                                                                                                                                                                                                                           |

|                                                                                                                                                                                                                                                                                                                                                                                                                                                                                                                                                                                                                                                                                                                                                                                                                                                                                                                                                                                                                                                                                                                                                                                                                                                                                                                                                                                                                                                                                                                                                                                                                                                                                                                                                                                                                                                                                                                                                                                                                                                                                                                                                                                                                                                                                                                                                                                                                                                                                                                                                                                                                                                                                                                                                                                                                                                                                                                                                                                                                                                                                                                                                                                                                                                                                                                                                                                                                                                                                                                                                                                                                                                                                                                                                                                                                                                                                                                                                                                                                                                                                                                                                                                                                                                                                                                                                                                                                                                                                                                                                                                                                                                                                                                                                                                                                                                                                                                                                                                                                                                                                                                                                                                                                                                                                                                                |                                                                                                                                                                                  |                                                                                                                            |                                                                                                                                                                                                                                                                                                                                                                                                                                                                                                                                                                                                                                                                                        |                                                                                                                                                                                                                                                                                                                                                                           |
|--------------------------------------------------------------------------------------------------------------------------------------------------------------------------------------------------------------------------------------------------------------------------------------------------------------------------------------------------------------------------------------------------------------------------------------------------------------------------------------------------------------------------------------------------------------------------------------------------------------------------------------------------------------------------------------------------------------------------------------------------------------------------------------------------------------------------------------------------------------------------------------------------------------------------------------------------------------------------------------------------------------------------------------------------------------------------------------------------------------------------------------------------------------------------------------------------------------------------------------------------------------------------------------------------------------------------------------------------------------------------------------------------------------------------------------------------------------------------------------------------------------------------------------------------------------------------------------------------------------------------------------------------------------------------------------------------------------------------------------------------------------------------------------------------------------------------------------------------------------------------------------------------------------------------------------------------------------------------------------------------------------------------------------------------------------------------------------------------------------------------------------------------------------------------------------------------------------------------------------------------------------------------------------------------------------------------------------------------------------------------------------------------------------------------------------------------------------------------------------------------------------------------------------------------------------------------------------------------------------------------------------------------------------------------------------------------------------------------------------------------------------------------------------------------------------------------------------------------------------------------------------------------------------------------------------------------------------------------------------------------------------------------------------------------------------------------------------------------------------------------------------------------------------------------------------------------------------------------------------------------------------------------------------------------------------------------------------------------------------------------------------------------------------------------------------------------------------------------------------------------------------------------------------------------------------------------------------------------------------------------------------------------------------------------------------------------------------------------------------------------------------------------------------------------------------------------------------------------------------------------------------------------------------------------------------------------------------------------------------------------------------------------------------------------------------------------------------------------------------------------------------------------------------------------------------------------------------------------------------------------------------------------------------------------------------------------------------------------------------------------------------------------------------------------------------------------------------------------------------------------------------------------------------------------------------------------------------------------------------------------------------------------------------------------------------------------------------------------------------------------------------------------------------------------------------------------------------------------------------------------------------------------------------------------------------------------------------------------------------------------------------------------------------------------------------------------------------------------------------------------------------------------------------------------------------------------------------------------------------------------------------------------------------------------------------------------------|----------------------------------------------------------------------------------------------------------------------------------------------------------------------------------|----------------------------------------------------------------------------------------------------------------------------|----------------------------------------------------------------------------------------------------------------------------------------------------------------------------------------------------------------------------------------------------------------------------------------------------------------------------------------------------------------------------------------------------------------------------------------------------------------------------------------------------------------------------------------------------------------------------------------------------------------------------------------------------------------------------------------|---------------------------------------------------------------------------------------------------------------------------------------------------------------------------------------------------------------------------------------------------------------------------------------------------------------------------------------------------------------------------|
| EPI_ISL_949655, EPI_ISL_949656, EPI_ISL_949657, EPI_ISL_949658, EPI_ISL_949659, EPI_ISL_949660, EPI_ISL_949661, EPI_ISL_949665, EPI_ISL_949667, EPI_ISL_949673, EPI_ISL_949674, EPI_ISL_949675, EPI_ISL_949676, EPI_ISL_949677, EPI_ISL_949678, EPI_ISL_949679, EPI_ISL_949680, EPI_ISL_949681, EPI_ISL_949682, EPI_ISL_949683, EPI_ISL_949688, EPI_ISL_949689, EPI_ISL_949690, EPI_ISL_949691, EPI_ISL_949692, EPI_ISL_949693, EPI_ISL_949694, EPI_ISL_949695, EPI_ISL_949696, EPI_ISL_949697, EPI_ISL_949698, EPI_ISL_949699, EPI_ISL_949700, EPI_ISL_949701, EPI_ISL_949702, EPI_ISL_949703, EPI_ISL_949704, EPI_ISL_949705, EPI_ISL_949706, EPI_ISL_949707                                                                                                                                                                                                                                                                                                                                                                                                                                                                                                                                                                                                                                                                                                                                                                                                                                                                                                                                                                                                                                                                                                                                                                                                                                                                                                                                                                                                                                                                                                                                                                                                                                                                                                                                                                                                                                                                                                                                                                                                                                                                                                                                                                                                                                                                                                                                                                                                                                                                                                                                                                                                                                                                                                                                                                                                                                                                                                                                                                                                                                                                                                                                                                                                                                                                                                                                                                                                                                                                                                                                                                                                                                                                                                                                                                                                                                                                                                                                                                                                                                                                                                                                                                                                                                                                                                                                                                                                                                                                                                                                                                                                                                                                 | University of Edinburgh                                                                                                                                                          |                                                                                                                            |                                                                                                                                                                                                                                                                                                                                                                                                                                                                                                                                                                                                                                                                                        |                                                                                                                                                                                                                                                                                                                                                                           |
| see above                                                                                                                                                                                                                                                                                                                                                                                                                                                                                                                                                                                                                                                                                                                                                                                                                                                                                                                                                                                                                                                                                                                                                                                                                                                                                                                                                                                                                                                                                                                                                                                                                                                                                                                                                                                                                                                                                                                                                                                                                                                                                                                                                                                                                                                                                                                                                                                                                                                                                                                                                                                                                                                                                                                                                                                                                                                                                                                                                                                                                                                                                                                                                                                                                                                                                                                                                                                                                                                                                                                                                                                                                                                                                                                                                                                                                                                                                                                                                                                                                                                                                                                                                                                                                                                                                                                                                                                                                                                                                                                                                                                                                                                                                                                                                                                                                                                                                                                                                                                                                                                                                                                                                                                                                                                                                                                      | Liverpool Clinical Laboratories                                                                                                                                                  | COVID-19 Genomics UK (COG-UK) Consortium                                                                                   | Sam Haldenby, Anita Lucaci, Steve Paterson, Julian Hiscox, Alistair Darby, M Almsaud, A Alrezaihi, Muhannad Alruwaili, Stuart D Armstrong, Jones Benjamin, Eleanor G Bentley, Anu Chawla, Jordan J Clark, Angela Cowell, Richard Eccles, Isabel Garcia-Orivral, Michael Gemmell, Alessandro Gerada, PKF Gilmore, Richard Gregory, Ximeng Han, Catherine Hartley, Margaret Hughes, Imren Tiritza-Gomara, James Johnson, L Luu, Jenifer Manson, Charlotte Nelson, Elaine O'Toole, Cassie Olateju, Rebekah Penrice-Randal, Lucille Rainbow, N.P Randle, Trevor Ian Robinson, Parul Sharma, Ghada T Shawli, James P Stewart, Neil Swainston, Ecaterina Vamos, Joanne Watts, Mark Whitehead |                                                                                                                                                                                                                                                                                                                                                                           |
| EPI_ISL_949793, EPI_ISL_949794, EPI_ISL_949802, EPI_ISL_949909, EPI_ISL_949910, EPI_ISL_949911, EPI_ISL_949912, EPI_ISL_949913, EPI_ISL_949914, EPI_ISL_949917, EPI_ISL_949919, EPI_ISL_950019, EPI_ISL_950028, EPI_ISL_950034, EPI_ISL_950039, EPI_ISL_950040, EPI_ISL_950041, EPI_ISL_950042, EPI_ISL_950043, EPI_ISL_950044, EPI_ISL_950045, EPI_ISL_950046, EPI_ISL_950047, EPI_ISL_950049, EPI_ISL_950050, EPI_ISL_950051, EPI_ISL_950052, EPI_ISL_950053, EPI_ISL_950054, EPI_ISL_950055, EPI_ISL_950056, EPI_ISL_950057, EPI_ISL_950058, EPI_ISL_950059, EPI_ISL_950060, EPI_ISL_950061, EPI_ISL_950062, EPI_ISL_950063, EPI_ISL_950064, EPI_ISL_950065, EPI_ISL_950066, EPI_ISL_950067, EPI_ISL_950071, EPI_ISL_950172, EPI_ISL_950174, EPI_ISL_950175, EPI_ISL_950176, EPI_ISL_950178, EPI_ISL_950179, EPI_ISL_950180, EPI_ISL_950181, EPI_ISL_950182, EPI_ISL_950183, EPI_ISL_950184, EPI_ISL_950185, EPI_ISL_950186, EPI_ISL_950187, EPI_ISL_950188, EPI_ISL_950189, EPI_ISL_950190, EPI_ISL_950191, EPI_ISL_950192, EPI_ISL_950193, EPI_ISL_950194, EPI_ISL_950196, EPI_ISL_950197, EPI_ISL_950199                                                                                                                                                                                                                                                                                                                                                                                                                                                                                                                                                                                                                                                                                                                                                                                                                                                                                                                                                                                                                                                                                                                                                                                                                                                                                                                                                                                                                                                                                                                                                                                                                                                                                                                                                                                                                                                                                                                                                                                                                                                                                                                                                                                                                                                                                                                                                                                                                                                                                                                                                                                                                                                                                                                                                                                                                                                                                                                                                                                                                                                                                                                                                                                                                                                                                                                                                                                                                                                                                                                                                                                                                                                                                                                                                                                                                                                                                                                                                                                                                                                                                                                                                                                                                 | University College London, Great Ormond Street Hospital for Children NHS Foundation Trust, Imperial College Healthcare NHS Trust                                                 | COVID-19 Genomics UK (COG-UK) Consortium                                                                                   | Sergi Castellano, Rachel Williams, Mark Kristiansen, Paola Resende Silva, Sunando Roy, Tony Brooks, Helena Tutill, Paola Niola, Patricia Dyal, Charlotte Williams, Leysa Forrest, Yasmin Panchbhaya, Jacqueline Findlay, Samuel Weeks, Julianne Brown, Kathryn Harris, Paul Randell, James Price, Alison Holmes, Judith Breuer                                                                                                                                                                                                                                                                                                                                                         |                                                                                                                                                                                                                                                                                                                                                                           |
| EPI_ISL_950373, EPI_ISL_950376, EPI_ISL_950379, EPI_ISL_950382, EPI_ISL_950391, EPI_ISL_950392, EPI_ISL_950393, EPI_ISL_950394, EPI_ISL_950395, EPI_ISL_950396, EPI_ISL_950397, EPI_ISL_950398, EPI_ISL_950399, EPI_ISL_950400, EPI_ISL_950401, EPI_ISL_950523, EPI_ISL_950524, EPI_ISL_950525, EPI_ISL_950526, EPI_ISL_950527, EPI_ISL_950528, EPI_ISL_950529, EPI_ISL_950530, EPI_ISL_950531, EPI_ISL_950532, EPI_ISL_950533, EPI_ISL_950534, EPI_ISL_950535, EPI_ISL_950536, EPI_ISL_950537, EPI_ISL_950538, EPI_ISL_950539, EPI_ISL_950540, EPI_ISL_950541, EPI_ISL_950542, EPI_ISL_950543                                                                                                                                                                                                                                                                                                                                                                                                                                                                                                                                                                                                                                                                                                                                                                                                                                                                                                                                                                                                                                                                                                                                                                                                                                                                                                                                                                                                                                                                                                                                                                                                                                                                                                                                                                                                                                                                                                                                                                                                                                                                                                                                                                                                                                                                                                                                                                                                                                                                                                                                                                                                                                                                                                                                                                                                                                                                                                                                                                                                                                                                                                                                                                                                                                                                                                                                                                                                                                                                                                                                                                                                                                                                                                                                                                                                                                                                                                                                                                                                                                                                                                                                                                                                                                                                                                                                                                                                                                                                                                                                                                                                                                                                                                                                 | see above                                                                                                                                                                        | COVID-19 Genomics UK (COG-UK) Consortium                                                                                   | Darren L Smith, Andrew Nelson, Matthew Bashton, Greg R Young, Joshua Loh, John Allan, Mohammad A Tariq, Giles S Holt, Gary Black, Wen C Yew, Lynn Dover, Paul Baker, Steve Liggett, Sarah Essex, Jane Greenaway, Debra Padgett, Clive Graham, Garren Scott, Edward Barton, Emma Swindells, Brendan Payne, Jennifer Collins, Yusra Taha, Gary Eltringham                                                                                                                                                                                                                                                                                                                                |                                                                                                                                                                                                                                                                                                                                                                           |
| EPI_ISL_950639, EPI_ISL_950640, EPI_ISL_950641, EPI_ISL_950642, EPI_ISL_950643, EPI_ISL_950644, EPI_ISL_950645                                                                                                                                                                                                                                                                                                                                                                                                                                                                                                                                                                                                                                                                                                                                                                                                                                                                                                                                                                                                                                                                                                                                                                                                                                                                                                                                                                                                                                                                                                                                                                                                                                                                                                                                                                                                                                                                                                                                                                                                                                                                                                                                                                                                                                                                                                                                                                                                                                                                                                                                                                                                                                                                                                                                                                                                                                                                                                                                                                                                                                                                                                                                                                                                                                                                                                                                                                                                                                                                                                                                                                                                                                                                                                                                                                                                                                                                                                                                                                                                                                                                                                                                                                                                                                                                                                                                                                                                                                                                                                                                                                                                                                                                                                                                                                                                                                                                                                                                                                                                                                                                                                                                                                                                                 | Queens Medical Centre, Clinical Microbiology Department / DeepSeq Nottingham                                                                                                     | COVID-19 Genomics UK (COG-UK) Consortium                                                                                   | Gemma Clark, Wendy Smith, Manjinder Khakh, Vicki M Fleming, Michelle M Lister, Hannah Howson-Wells, Jonathan Ball, Patrick McClure, Joseph Chappell, Theocharis Tsoleridis, Nadine Holmes, Matthew Carlisle, Christopher Moore, Fei Sang, Johnny Debebe, Victoria Wright, Matthew Loose                                                                                                                                                                                                                                                                                                                                                                                                |                                                                                                                                                                                                                                                                                                                                                                           |
| EPI_ISL_950755, EPI_ISL_950756, EPI_ISL_950757, EPI_ISL_950758, EPI_ISL_950759, EPI_ISL_950760, EPI_ISL_950761                                                                                                                                                                                                                                                                                                                                                                                                                                                                                                                                                                                                                                                                                                                                                                                                                                                                                                                                                                                                                                                                                                                                                                                                                                                                                                                                                                                                                                                                                                                                                                                                                                                                                                                                                                                                                                                                                                                                                                                                                                                                                                                                                                                                                                                                                                                                                                                                                                                                                                                                                                                                                                                                                                                                                                                                                                                                                                                                                                                                                                                                                                                                                                                                                                                                                                                                                                                                                                                                                                                                                                                                                                                                                                                                                                                                                                                                                                                                                                                                                                                                                                                                                                                                                                                                                                                                                                                                                                                                                                                                                                                                                                                                                                                                                                                                                                                                                                                                                                                                                                                                                                                                                                                                                 | Lincolnshire Hospitals and DeepSeq Nottingham                                                                                                                                    | COVID-19 Genomics UK (COG-UK) Consortium                                                                                   | Nichola Duckworth, Tim Sloan, Sarah Walsh, Jonathan Ball, Patrick McClure, Joseph Chappell, Nadine Holmes, Matthew Carlisle, Christopher Moore, Fei Sang, Johnny Debebe, Victoria Wright, Matthew Loose                                                                                                                                                                                                                                                                                                                                                                                                                                                                                |                                                                                                                                                                                                                                                                                                                                                                           |
| EPI_ISL_951492, EPI_ISL_951493, EPI_ISL_951494, EPI_ISL_951495, EPI_ISL_951496, EPI_ISL_951497, EPI_ISL_951498, EPI_ISL_951499, EPI_ISL_951501, EPI_ISL_951502, EPI_ISL_951503, EPI_ISL_951504, EPI_ISL_951505, EPI_ISL_951506, EPI_ISL_951508, EPI_ISL_951512, EPI_ISL_951513, EPI_ISL_951514, EPI_ISL_951515, EPI_ISL_951517, EPI_ISL_951518, EPI_ISL_951519, EPI_ISL_951521, EPI_ISL_951522, EPI_ISL_951523, EPI_ISL_951524, EPI_ISL_951525, EPI_ISL_951527, EPI_ISL_951528, EPI_ISL_951529, EPI_ISL_951530, EPI_ISL_951531, EPI_ISL_951532, EPI_ISL_951533, EPI_ISL_951534, EPI_ISL_951535, EPI_ISL_951536, EPI_ISL_951537, EPI_ISL_951538, EPI_ISL_951541, EPI_ISL_951542, EPI_ISL_951543, EPI_ISL_951544, EPI_ISL_951545, EPI_ISL_951546, EPI_ISL_951547, EPI_ISL_951548, EPI_ISL_951549, EPI_ISL_951550, EPI_ISL_951552, EPI_ISL_951553, EPI_ISL_951554, EPI_ISL_951555, EPI_ISL_951556, EPI_ISL_951558, EPI_ISL_951559, EPI_ISL_951560, EPI_ISL_951561, EPI_ISL_951562, EPI_ISL_951564, EPI_ISL_951567, EPI_ISL_951569, EPI_ISL_951570, EPI_ISL_951571, EPI_ISL_951572, EPI_ISL_951573, EPI_ISL_951574, EPI_ISL_951575, EPI_ISL_951576, EPI_ISL_951577, EPI_ISL_951578, EPI_ISL_951580, EPI_ISL_951581, EPI_ISL_951582, EPI_ISL_951583, EPI_ISL_951585, EPI_ISL_951738, EPI_ISL_951739, EPI_ISL_951742, EPI_ISL_951744, EPI_ISL_951745, EPI_ISL_951753, EPI_ISL_951758, EPI_ISL_951759, EPI_ISL_951760, EPI_ISL_951761, EPI_ISL_951765, EPI_ISL_951766, EPI_ISL_951767, EPI_ISL_951769, EPI_ISL_951778, EPI_ISL_951779, EPI_ISL_951780, EPI_ISL_951781, EPI_ISL_951782, EPI_ISL_951785, EPI_ISL_951786, EPI_ISL_951787, EPI_ISL_951820, EPI_ISL_951821, EPI_ISL_951843, EPI_ISL_951844, EPI_ISL_951851, EPI_ISL_951852, EPI_ISL_951853, EPI_ISL_951855, EPI_ISL_951856, EPI_ISL_951857, EPI_ISL_951858, EPI_ISL_951859, EPI_ISL_951861, EPI_ISL_951862, EPI_ISL_951863, EPI_ISL_951866, EPI_ISL_951867, EPI_ISL_951869, EPI_ISL_951875, EPI_ISL_951876, EPI_ISL_951877, EPI_ISL_951878, EPI_ISL_951881, EPI_ISL_951882, EPI_ISL_951884, EPI_ISL_951885, EPI_ISL_951887, EPI_ISL_951888, EPI_ISL_951890, EPI_ISL_951893, EPI_ISL_951894, EPI_ISL_951895, EPI_ISL_951896, EPI_ISL_951897, EPI_ISL_951898, EPI_ISL_951899, EPI_ISL_951900, EPI_ISL_951901, EPI_ISL_951902, EPI_ISL_951903, EPI_ISL_951904, EPI_ISL_951905, EPI_ISL_951906, EPI_ISL_951907, EPI_ISL_951908, EPI_ISL_951909, EPI_ISL_951910, EPI_ISL_951911, EPI_ISL_951912, EPI_ISL_951913, EPI_ISL_951916, EPI_ISL_951917, EPI_ISL_951918, EPI_ISL_951919, EPI_ISL_951920, EPI_ISL_951921, EPI_ISL_951922, EPI_ISL_951923, EPI_ISL_951924, EPI_ISL_951925, EPI_ISL_951926, EPI_ISL_951927, EPI_ISL_951928, EPI_ISL_951929, EPI_ISL_951930, EPI_ISL_951931, EPI_ISL_951932, EPI_ISL_951933, EPI_ISL_951934, EPI_ISL_951935, EPI_ISL_951936, EPI_ISL_951937, EPI_ISL_951938, EPI_ISL_951939, EPI_ISL_951940, EPI_ISL_951941, EPI_ISL_951942, EPI_ISL_951943, EPI_ISL_951944, EPI_ISL_951945, EPI_ISL_951946, EPI_ISL_951947, EPI_ISL_951948, EPI_ISL_951949, EPI_ISL_951950, EPI_ISL_951951, EPI_ISL_951952, EPI_ISL_951953, EPI_ISL_951954, EPI_ISL_951955, EPI_ISL_951956, EPI_ISL_951957, EPI_ISL_951958, EPI_ISL_951959, EPI_ISL_951960, EPI_ISL_951961, EPI_ISL_951962, EPI_ISL_951963, EPI_ISL_951964, EPI_ISL_951965, EPI_ISL_951966, EPI_ISL_951968, EPI_ISL_951969, EPI_ISL_951972, EPI_ISL_951973, EPI_ISL_952006, EPI_ISL_952007, EPI_ISL_952008, EPI_ISL_952009, EPI_ISL_952010, EPI_ISL_952011, EPI_ISL_952012, EPI_ISL_952013, EPI_ISL_952014, EPI_ISL_952015, EPI_ISL_952018, EPI_ISL_952019, EPI_ISL_952020, EPI_ISL_952022, EPI_ISL_952025, EPI_ISL_952027, EPI_ISL_952029, EPI_ISL_952030, EPI_ISL_952031, EPI_ISL_952032, EPI_ISL_952033, EPI_ISL_952035, EPI_ISL_952036, EPI_ISL_952037, EPI_ISL_952038, EPI_ISL_952039, EPI_ISL_952040, EPI_ISL_952041, EPI_ISL_952042, EPI_ISL_952043, EPI_ISL_952044, EPI_ISL_952045, EPI_ISL_952046, EPI_ISL_952065, EPI_ISL_952066, EPI_ISL_952067, EPI_ISL_952069, EPI_ISL_952070, EPI_ISL_952071, EPI_ISL_952072, EPI_ISL_952073, EPI_ISL_952074, EPI_ISL_952075, EPI_ISL_952076, EPI_ISL_952077, EPI_ISL_952078, EPI_ISL_952079, EPI_ISL_952080, EPI_ISL_952081, EPI_ISL_952082, EPI_ISL_952083, EPI_ISL_952084, EPI_ISL_952085, EPI_ISL_952086, EPI_ISL_952087, EPI_ISL_952088, EPI_ISL_952089, EPI_ISL_952090, EPI_ISL_952091, EPI_ISL_952092, EPI_ISL_952093, EPI_ISL_952095, EPI_ISL_952096, EPI_ISL_952097, EPI_ISL_952098, EPI_ISL_952100, EPI_ISL_952102, EPI_ISL_952104, EPI_ISL_952108, EPI_ISL_952109, EPI_ISL_952110, EPI_ISL_952111, EPI_ISL_952112, EPI_ISL_952113, EPI_ISL_952114, EPI_ISL_952119, EPI_ISL_952120, EPI_ISL_952122, EPI_ISL_952123, EPI_ISL_952124, EPI_ISL_952126, EPI_ISL_952128, EPI_ISL_952129, EPI_ISL_952130, EPI_ISL_952131, EPI_ISL_952132, EPI_ISL_952133, EPI_ISL_952134, EPI_ISL_952136, EPI_ISL_952137, EPI_ISL_952138, EPI_ISL_952139, EPI_ISL_952140, EPI_ISL_952141, EPI_ISL_952143, EPI_ISL_952144, EPI_ISL_952145, EPI_ISL_952146, EPI_ISL_952147, EPI_ISL_952148, EPI_ISL_952149, EPI_ISL_952150, EPI_ISL_952151, EPI_ISL_952152, EPI_ISL_952153, EPI_ISL_952154, EPI_ISL_952156, EPI_ISL_952157, EPI_ISL_952158, EPI_ISL_952159, EPI_ISL_952161, EPI_ISL_952162, EPI_ISL_952163, EPI_ISL_952164, EPI_ISL_952165, EPI_ISL_952166, EPI_ISL_952167 | see above                                                                                                                                                                        | Originating lab: Wales Specialist Virology Centre Sequencing lab: Pathogen Genomics Unit                                   | Public Health Wales Microbiology Cardiff Wales Specialist Virology Centre                                                                                                                                                                                                                                                                                                                                                                                                                                                                                                                                                                                                              | Catherine Moore, Johnathan Evans, Laura Gifford, Malorie Perry, Simon Cottrell, Angela Marchbank, Alec Birchley, Alexander Adams, Amy Gaskin, Bree Gatica-Wilcox, Jason Coombes, Joel Southgate, Lauren Gilbert, Lee Graham, Nicole Pacchiarini, Lara Kuchniene-Summerhayes, Sarah Taylor, Sophie Jones, Sara Rey, Matthew Bull, Joanne Watkins, Sally Corden, Tom Connor |
| EPI_ISL_952453, EPI_ISL_952454, EPI_ISL_952456, EPI_ISL_952460, EPI_ISL_952462, EPI_ISL_952464, EPI_ISL_952465, EPI_ISL_952466, EPI_ISL_952467, EPI_ISL_952469, EPI_ISL_952470, EPI_ISL_952477, EPI_ISL_952478, EPI_ISL_952479, EPI_ISL_952480, EPI_ISL_952481, EPI_ISL_952482, EPI_ISL_952483, EPI_ISL_952484, EPI_ISL_952485, EPI_ISL_952558                                                                                                                                                                                                                                                                                                                                                                                                                                                                                                                                                                                                                                                                                                                                                                                                                                                                                                                                                                                                                                                                                                                                                                                                                                                                                                                                                                                                                                                                                                                                                                                                                                                                                                                                                                                                                                                                                                                                                                                                                                                                                                                                                                                                                                                                                                                                                                                                                                                                                                                                                                                                                                                                                                                                                                                                                                                                                                                                                                                                                                                                                                                                                                                                                                                                                                                                                                                                                                                                                                                                                                                                                                                                                                                                                                                                                                                                                                                                                                                                                                                                                                                                                                                                                                                                                                                                                                                                                                                                                                                                                                                                                                                                                                                                                                                                                                                                                                                                                                                 | see above                                                                                                                                                                        | Centre for Enzyme Innovation, University of Portsmouth / Translational Research Laboratory, Portsmouth Hospitals NHS Trust | COVID-19 Genomics UK (COG-UK) Consortium                                                                                                                                                                                                                                                                                                                                                                                                                                                                                                                                                                                                                                               | Angela Beckett, Salman Goudarzi, Christopher Fearn, Kate Cook, Katie Loveson, Sharon Glaysheer, Scott Elliott, Samuel Robson                                                                                                                                                                                                                                              |
| EPI_ISL_952953, EPI_ISL_952978                                                                                                                                                                                                                                                                                                                                                                                                                                                                                                                                                                                                                                                                                                                                                                                                                                                                                                                                                                                                                                                                                                                                                                                                                                                                                                                                                                                                                                                                                                                                                                                                                                                                                                                                                                                                                                                                                                                                                                                                                                                                                                                                                                                                                                                                                                                                                                                                                                                                                                                                                                                                                                                                                                                                                                                                                                                                                                                                                                                                                                                                                                                                                                                                                                                                                                                                                                                                                                                                                                                                                                                                                                                                                                                                                                                                                                                                                                                                                                                                                                                                                                                                                                                                                                                                                                                                                                                                                                                                                                                                                                                                                                                                                                                                                                                                                                                                                                                                                                                                                                                                                                                                                                                                                                                                                                 | Virology Department, Sheffield Teaching Hospitals NHS Foundation Trust/Department of Infection, Immunity and Cardiovascular Disease, The Medical School, University of Sheffield | COVID-19 Genomics UK (COG-UK) Consortium                                                                                   | Thushan de Silva, Matthew Parker, Nikki Smith, Adri Anygal, Rebecca Brown, Luke Green, Rachel Tucker, Paul Parsons, Danielle Groves, Katie Johnson, Laura Carrilero, Alex Keeley, Dave Partridge, Matthew Wyles, Benjamin Lindsey, Mehmet Yavuz, Mohammad Razi, Cariad Evans                                                                                                                                                                                                                                                                                                                                                                                                           |                                                                                                                                                                                                                                                                                                                                                                           |
| EPI_ISL_953241, EPI_ISL_953243, EPI_ISL_953244, EPI_ISL_953246, EPI_ISL_953247, EPI_ISL_953251, EPI_ISL_953254, EPI_ISL_953259, EPI_ISL_953261, EPI_ISL_953262, EPI_ISL_953263, EPI_ISL_953267, EPI_ISL_953272, EPI_ISL_953281                                                                                                                                                                                                                                                                                                                                                                                                                                                                                                                                                                                                                                                                                                                                                                                                                                                                                                                                                                                                                                                                                                                                                                                                                                                                                                                                                                                                                                                                                                                                                                                                                                                                                                                                                                                                                                                                                                                                                                                                                                                                                                                                                                                                                                                                                                                                                                                                                                                                                                                                                                                                                                                                                                                                                                                                                                                                                                                                                                                                                                                                                                                                                                                                                                                                                                                                                                                                                                                                                                                                                                                                                                                                                                                                                                                                                                                                                                                                                                                                                                                                                                                                                                                                                                                                                                                                                                                                                                                                                                                                                                                                                                                                                                                                                                                                                                                                                                                                                                                                                                                                                                 | see above                                                                                                                                                                        | Bioinformatics and Biostatistics Lab, Advanced Sequencing Facility                                                         | COVID-19 Genomics UK (COG-UK) Consortium                                                                                                                                                                                                                                                                                                                                                                                                                                                                                                                                                                                                                                               | Aengus Stewart, Jerome Nicod, Chelsea Sawyer, Laura Cubitt, Harshil Patel, Margaret Crawford                                                                                                                                                                                                                                                                              |
| EPI_ISL_956446, EPI_ISL_956487, EPI_ISL_956508, EPI_ISL_956562, EPI_ISL_956576, EPI_ISL_956585, EPI_ISL_956587, EPI_ISL_956592, EPI_ISL_956601, EPI_ISL_956602, EPI_ISL_956606, EPI_ISL_956618, EPI_ISL_956625, EPI_ISL_956626, EPI_ISL_956631, EPI_ISL_956636, EPI_ISL_956651, EPI_ISL_956690, EPI_ISL_956691, EPI_ISL_956694, EPI_ISL_956699, EPI_ISL_956729                                                                                                                                                                                                                                                                                                                                                                                                                                                                                                                                                                                                                                                                                                                                                                                                                                                                                                                                                                                                                                                                                                                                                                                                                                                                                                                                                                                                                                                                                                                                                                                                                                                                                                                                                                                                                                                                                                                                                                                                                                                                                                                                                                                                                                                                                                                                                                                                                                                                                                                                                                                                                                                                                                                                                                                                                                                                                                                                                                                                                                                                                                                                                                                                                                                                                                                                                                                                                                                                                                                                                                                                                                                                                                                                                                                                                                                                                                                                                                                                                                                                                                                                                                                                                                                                                                                                                                                                                                                                                                                                                                                                                                                                                                                                                                                                                                                                                                                                                                 | see above                                                                                                                                                                        | Lighthouse Lab in Alderley Park                                                                                            | Wellcome Sanger Institute for the COVID-19 Genomics UK (COG-UK) Consortium                                                                                                                                                                                                                                                                                                                                                                                                                                                                                                                                                                                                             | Jacquelyn Wynn, Mairead Hyland, The Lighthouse Lab in Alderley Park and Alex Alderton, Roberto Amato, Sonia Goncalves, Ewan Harrison, David K. Jackson, Ian Johnston, Dominic Kwiatkowski, Cordelia Langford, John Sillitoe on behalf of the Wellcome Sanger Institute COVID-19 Surveillance Team                                                                         |
| EPI_ISL_957613, EPI_ISL_957616, EPI_ISL_957620, EPI_ISL_957621, EPI_ISL_957624, EPI_ISL_957627, EPI_ISL_957630, EPI_ISL_957635, EPI_ISL_957641, EPI_ISL_957643, EPI_ISL_957645, EPI_ISL_957650, EPI_ISL_957652, EPI_ISL_957654, EPI_ISL_957655, EPI_ISL_957656, EPI_ISL_957660, EPI_ISL_957670, EPI_ISL_957672, EPI_ISL_957675, EPI_ISL_957677, EPI_ISL_957680, EPI_ISL_957683, EPI_ISL_957686, EPI_ISL_957687, EPI_ISL_957691, EPI_ISL_957698, EPI_ISL_957700, EPI_ISL_957701, EPI_ISL_957702, EPI_ISL_957721, EPI_ISL_957722, EPI_ISL_957723, EPI_ISL_957735, EPI_ISL_957740, EPI_ISL_957741, EPI_ISL_957745, EPI_ISL_957748, EPI_ISL_957753, EPI_ISL_957755, EPI_ISL_957757, EPI_ISL_957759, EPI_ISL_957766, EPI_ISL_957769, EPI_ISL_957771, EPI_ISL_957772, EPI_ISL_957780, EPI_ISL_957783, EPI_ISL_957787, EPI_ISL_957797, EPI_ISL_957799, EPI_ISL_957813, EPI_ISL_957817, EPI_ISL_957822, EPI_ISL_957826, EPI_ISL_957828, EPI_ISL_957829, EPI_ISL_957830, EPI_ISL_957832, EPI_ISL_957838, EPI_ISL_957841, EPI_ISL_957844, EPI_ISL_957846, EPI_ISL_957856, EPI_ISL_957859, EPI_ISL_957862, EPI_ISL_957863, EPI_ISL_957866, EPI_ISL_957867, EPI_ISL_957868, EPI_ISL_957872, EPI_ISL_957877, EPI_ISL_957878, EPI_ISL_957886, EPI_ISL_957892, EPI_ISL_957895, EPI_ISL_957897, EPI_ISL_957904, EPI_ISL_957907, EPI_ISL_957921, EPI_ISL_957961, EPI_ISL_957962, EPI_ISL_957971, EPI_ISL_958044, EPI_ISL_958194, EPI_ISL_958215, EPI_ISL_958216, EPI_ISL_958217, EPI_ISL_958218, EPI_ISL_958219, EPI_ISL_958220, EPI_ISL_958221, EPI_ISL_958222, EPI_ISL_958223, EPI_ISL_958224, EPI_ISL_958225, EPI_ISL_958226, EPI_ISL_958227, EPI_ISL_958228, EPI_ISL_958229, EPI_ISL_958230, EPI_ISL_958231, EPI_ISL_958232, EPI_ISL_958233, EPI_ISL_958234, EPI_ISL_958235, EPI_ISL_958236, EPI_ISL_958255, EPI_ISL_958256, EPI_ISL_958257, EPI_ISL_958258, EPI_ISL_958259, EPI_ISL_958260, EPI_ISL_958261, EPI_ISL_958262, EPI_ISL_958263, EPI_ISL_958264, EPI_ISL_958265, EPI_ISL_958266, EPI_ISL_958267, EPI_ISL_958268, EPI_ISL_958269, EPI_ISL_958270, EPI_ISL_958271, EPI_ISL_958272, EPI_ISL_958273, EPI_ISL_958274, EPI_ISL_958275, EPI_ISL_958277, EPI_ISL_958278, EPI_ISL_958279, EPI_ISL_958280, EPI_ISL_958281, EPI_ISL_958282, EPI_ISL_958283, EPI_ISL_958284, EPI_ISL_958285, EPI_ISL_958286, EPI_ISL_958287, EPI_ISL_958288, EPI_ISL_958289, EPI_ISL_958290, EPI_ISL_958291, EPI_ISL_958292, EPI_ISL_958293, EPI_ISL_958294, EPI_ISL_958295, EPI_ISL_958296, EPI_ISL_958297, EPI_ISL_958298, EPI_ISL_958299, EPI_ISL_958300, EPI_ISL_958301, EPI_ISL_958302, EPI_ISL_958303, EPI_ISL_958304, EPI_ISL_958305, EPI_ISL_958306, EPI_ISL_958307, EPI_ISL_958308, EPI_ISL_958309, EPI_ISL_958310, EPI_ISL_958311, EPI_ISL_958312, EPI_ISL_958313, EPI_ISL_958314, EPI_ISL_958315, EPI_ISL_958316, EPI_ISL_958317, EPI_ISL_958318, EPI_ISL_958319, EPI_ISL_958320, EPI_ISL_958321, EPI_ISL_958322, EPI_ISL_958323, EPI_ISL_958324, EPI_ISL_958325, EPI_ISL_958326                                                                                                                                                                                                                                                                                                                                                                                                                                                                                                                                                                                                                                                                                                                                                                                                                                                                                                                                                                                                                                                                                                                                                                                                                                                                                                                                                                                                                                                                                                                                                                                                                                                                                                                                                                                                                                                                                                                                                                                                                                                                                                                                                                                                                                                                                                                                                                 |                                                                                                                                                                                  |                                                                                                                            |                                                                                                                                                                                                                                                                                                                                                                                                                                                                                                                                                                                                                                                                                        |                                                                                                                                                                                                                                                                                                                                                                           |





|                                                                                                                                                                                                                                                                                                                                                                                                                                                                                                                                                                                                                                                                                                                                                                                                                                                                                                                                                                                                                                                                                                                                                                                                                                                                                                                                                                                                                                                                                                                                                                                                                                                                                                                                                                                                                                                                                                                                                                                                                                                                                                                                                                                                                                                                                                                                                                                                                                                                                                                                                                                                                                                                                                                                                                                                                                                                                                                                                                                                                                                                                                                                                                                                                                                                                                                                                                                                                                                                                                                                                                                                                                                                                                                                                                                                                                                                                                                                                                                                                                                                                                                                                                                                                                                                                                                                                                                                                                                                                                                                                                                                                                                                                                                                                                                                                                                                                |           |                                                                                                                         |                                                                            |                                                                                                                                                                                                                                                                                                                                                                                                                                                                                                                                                                                                                                                                                         |
|--------------------------------------------------------------------------------------------------------------------------------------------------------------------------------------------------------------------------------------------------------------------------------------------------------------------------------------------------------------------------------------------------------------------------------------------------------------------------------------------------------------------------------------------------------------------------------------------------------------------------------------------------------------------------------------------------------------------------------------------------------------------------------------------------------------------------------------------------------------------------------------------------------------------------------------------------------------------------------------------------------------------------------------------------------------------------------------------------------------------------------------------------------------------------------------------------------------------------------------------------------------------------------------------------------------------------------------------------------------------------------------------------------------------------------------------------------------------------------------------------------------------------------------------------------------------------------------------------------------------------------------------------------------------------------------------------------------------------------------------------------------------------------------------------------------------------------------------------------------------------------------------------------------------------------------------------------------------------------------------------------------------------------------------------------------------------------------------------------------------------------------------------------------------------------------------------------------------------------------------------------------------------------------------------------------------------------------------------------------------------------------------------------------------------------------------------------------------------------------------------------------------------------------------------------------------------------------------------------------------------------------------------------------------------------------------------------------------------------------------------------------------------------------------------------------------------------------------------------------------------------------------------------------------------------------------------------------------------------------------------------------------------------------------------------------------------------------------------------------------------------------------------------------------------------------------------------------------------------------------------------------------------------------------------------------------------------------------------------------------------------------------------------------------------------------------------------------------------------------------------------------------------------------------------------------------------------------------------------------------------------------------------------------------------------------------------------------------------------------------------------------------------------------------------------------------------------------------------------------------------------------------------------------------------------------------------------------------------------------------------------------------------------------------------------------------------------------------------------------------------------------------------------------------------------------------------------------------------------------------------------------------------------------------------------------------------------------------------------------------------------------------------------------------------------------------------------------------------------------------------------------------------------------------------------------------------------------------------------------------------------------------------------------------------------------------------------------------------------------------------------------------------------------------------------------------------------------------------------------------------------|-----------|-------------------------------------------------------------------------------------------------------------------------|----------------------------------------------------------------------------|-----------------------------------------------------------------------------------------------------------------------------------------------------------------------------------------------------------------------------------------------------------------------------------------------------------------------------------------------------------------------------------------------------------------------------------------------------------------------------------------------------------------------------------------------------------------------------------------------------------------------------------------------------------------------------------------|
| EPI_ISL_990956, EPI_ISL_990957, EPI_ISL_990958, EPI_ISL_990959, EPI_ISL_990960, EPI_ISL_990961, EPI_ISL_990962, EPI_ISL_990963, EPI_ISL_990964, EPI_ISL_990965, EPI_ISL_990966, EPI_ISL_990967, EPI_ISL_990968, EPI_ISL_990969, EPI_ISL_990970, EPI_ISL_990971, EPI_ISL_990972, EPI_ISL_990973, EPI_ISL_990974, EPI_ISL_990975, EPI_ISL_990976, EPI_ISL_990977, EPI_ISL_990978, EPI_ISL_990979, EPI_ISL_990980, EPI_ISL_990981, EPI_ISL_990982, EPI_ISL_990983, EPI_ISL_990984, EPI_ISL_990985, EPI_ISL_990986, EPI_ISL_990987, EPI_ISL_990988, EPI_ISL_990989, EPI_ISL_990990, EPI_ISL_990991, EPI_ISL_990992, EPI_ISL_990993, EPI_ISL_990994, EPI_ISL_990995, EPI_ISL_990996, EPI_ISL_990997, EPI_ISL_990998, EPI_ISL_990999, EPI_ISL_991000, EPI_ISL_991001, EPI_ISL_991002, EPI_ISL_991003, EPI_ISL_991004, EPI_ISL_991005, EPI_ISL_991006, EPI_ISL_991007, EPI_ISL_991008, EPI_ISL_991009, EPI_ISL_991010, EPI_ISL_991011, EPI_ISL_991012, EPI_ISL_991013, EPI_ISL_991014, EPI_ISL_991015, EPI_ISL_991016, EPI_ISL_991017, EPI_ISL_991018, EPI_ISL_991019, EPI_ISL_991020, EPI_ISL_991021, EPI_ISL_991022, EPI_ISL_991023, EPI_ISL_991024, EPI_ISL_991025, EPI_ISL_991026, EPI_ISL_991027, EPI_ISL_991028, EPI_ISL_991029, EPI_ISL_991030, EPI_ISL_991031, EPI_ISL_991032, EPI_ISL_991033, EPI_ISL_991034, EPI_ISL_991035, EPI_ISL_991036, EPI_ISL_991037, EPI_ISL_991038, EPI_ISL_991039, EPI_ISL_991041, EPI_ISL_991042, EPI_ISL_991043, EPI_ISL_991044, EPI_ISL_991045, EPI_ISL_991046, EPI_ISL_991047, EPI_ISL_991048, EPI_ISL_991049, EPI_ISL_991050, EPI_ISL_991051, EPI_ISL_991052, EPI_ISL_991053, EPI_ISL_991054, EPI_ISL_991055, EPI_ISL_991056, EPI_ISL_991057, EPI_ISL_991058, EPI_ISL_991059, EPI_ISL_991060, EPI_ISL_991061, EPI_ISL_991062, EPI_ISL_991063, EPI_ISL_991064, EPI_ISL_991065, EPI_ISL_991066, EPI_ISL_991067, EPI_ISL_991068, EPI_ISL_991069, EPI_ISL_991070, EPI_ISL_991071, EPI_ISL_991072, EPI_ISL_991073, EPI_ISL_991074, EPI_ISL_991075, EPI_ISL_991076, EPI_ISL_991077, EPI_ISL_991078, EPI_ISL_991079, EPI_ISL_991080, EPI_ISL_991081, EPI_ISL_991082, EPI_ISL_991083, EPI_ISL_991084, EPI_ISL_991085, EPI_ISL_991086, EPI_ISL_991087, EPI_ISL_991088, EPI_ISL_991089, EPI_ISL_991090, EPI_ISL_991091, EPI_ISL_991092, EPI_ISL_991093, EPI_ISL_991094, EPI_ISL_991095, EPI_ISL_991096, EPI_ISL_991097, EPI_ISL_991098, EPI_ISL_991099, EPI_ISL_991100, EPI_ISL_991101, EPI_ISL_991102, EPI_ISL_991103, EPI_ISL_991104, EPI_ISL_991105, EPI_ISL_991106, EPI_ISL_991107, EPI_ISL_991108, EPI_ISL_991109, EPI_ISL_991110, EPI_ISL_991111, EPI_ISL_991112, EPI_ISL_991113, EPI_ISL_991114, EPI_ISL_991115, EPI_ISL_991116, EPI_ISL_991117, EPI_ISL_991118, EPI_ISL_991119, EPI_ISL_991120, EPI_ISL_991121, EPI_ISL_991122, EPI_ISL_991123, EPI_ISL_991124, EPI_ISL_991125, EPI_ISL_991126, EPI_ISL_991127, EPI_ISL_991128, EPI_ISL_991129, EPI_ISL_991130, EPI_ISL_991131, EPI_ISL_991132, EPI_ISL_991133, EPI_ISL_991134, EPI_ISL_991135, EPI_ISL_991136, EPI_ISL_991137, EPI_ISL_991138, EPI_ISL_991139, EPI_ISL_991140, EPI_ISL_991141, EPI_ISL_991142, EPI_ISL_991143, EPI_ISL_991144, EPI_ISL_991145, EPI_ISL_991146, EPI_ISL_991147, EPI_ISL_991148, EPI_ISL_991149, EPI_ISL_991150, EPI_ISL_991151, EPI_ISL_991152, EPI_ISL_991153, EPI_ISL_991154, EPI_ISL_991155, EPI_ISL_991156, EPI_ISL_991157, EPI_ISL_991158, EPI_ISL_991159, EPI_ISL_991160, EPI_ISL_991161, EPI_ISL_991162, EPI_ISL_991163, EPI_ISL_991164, EPI_ISL_991165, EPI_ISL_991166, EPI_ISL_991167, EPI_ISL_991168, EPI_ISL_991169, EPI_ISL_991170, EPI_ISL_991171, EPI_ISL_991172, EPI_ISL_991222, EPI_ISL_991223, EPI_ISL_991224, EPI_ISL_991225, EPI_ISL_991226, EPI_ISL_991227, EPI_ISL_991228, EPI_ISL_991229, EPI_ISL_991230, EPI_ISL_991231, EPI_ISL_991232, EPI_ISL_991233, EPI_ISL_991234, EPI_ISL_991235, EPI_ISL_991236, EPI_ISL_991237, EPI_ISL_991238, EPI_ISL_991239, EPI_ISL_991240, EPI_ISL_991241, EPI_ISL_991242, EPI_ISL_991243, EPI_ISL_991244, EPI_ISL_991245, EPI_ISL_991246, EPI_ISL_991247, EPI_ISL_991248, EPI_ISL_991249, EPI_ISL_991250, EPI_ISL_991251, EPI_ISL_991252, EPI_ISL_991253, EPI_ISL_991254, EPI_ISL_991255, EPI_ISL_991256, EPI_ISL_991257, EPI_ISL_991258, EPI_ISL_991259, EPI_ISL_991260, EPI_ISL_991261, EPI_ISL_991262, EPI_ISL_991263, EPI_ISL_991264, EPI_ISL_991265, EPI_ISL_991266, EPI_ISL_991267, EPI_ISL_991268, EPI_ISL_991270, EPI_ISL_991271, EPI_ISL_991272, EPI_ISL_991273, EPI_ISL_991275, EPI_ISL_991276, EPI_ISL_991277, EPI_ISL_991278, EPI_ISL_991279, EPI_ISL_991280, EPI_ISL_991281, EPI_ISL_991282, EPI_ISL_991283, EPI_ISL_991284, EPI_ISL_991285, EPI_ISL_991286, EPI_ISL_991287, EPI_ISL_991288, EPI_ISL_991289, EPI_ISL_991290, EPI_ISL_991296, EPI_ISL_991297, EPI_ISL_991298, EPI_ISL_991299, EPI_ISL_991301, EPI_ISL_991303, EPI_ISL_991304, EPI_ISL_991305, EPI_ISL_991307, EPI_ISL_991308 | see above | Lighthouse Lab in Alderley Park                                                                                         | Wellcome Sanger Institute for the COVID-19 Genomics UK (COG-UK) Consortium | Jacquelyn Wynn, Mairead Hyland, The Lighthouse Lab in Alderley Park and Alex Alderton, Roberto Amato, Sonia Goncalves, Ewan Harrison, David K. Jackson, Ian Johnston, Dominic Kwiatkowski, Cordelia Langford, John Sillitoe on behalf of the Wellcome Sanger Institute COVID-19 Surveillance Team                                                                                                                                                                                                                                                                                                                                                                                       |
| EPI_ISL_991352, EPI_ISL_991353, EPI_ISL_991356, EPI_ISL_991357, EPI_ISL_991360, EPI_ISL_991362, EPI_ISL_991363, EPI_ISL_991364, EPI_ISL_991365, EPI_ISL_991369, EPI_ISL_991372, EPI_ISL_991373, EPI_ISL_991374, EPI_ISL_991375, EPI_ISL_991376, EPI_ISL_991378, EPI_ISL_991384, EPI_ISL_991388, EPI_ISL_991390, EPI_ISL_991391, EPI_ISL_991393, EPI_ISL_991396, EPI_ISL_991401, EPI_ISL_991402, EPI_ISL_991404, EPI_ISL_991406, EPI_ISL_991407, EPI_ISL_991408, EPI_ISL_991410, EPI_ISL_991411, EPI_ISL_991413, EPI_ISL_991414, EPI_ISL_991416, EPI_ISL_991420, EPI_ISL_991421, EPI_ISL_991424, EPI_ISL_991426, EPI_ISL_991427, EPI_ISL_991430, EPI_ISL_991431, EPI_ISL_991433, EPI_ISL_991436, EPI_ISL_991438, EPI_ISL_991439, EPI_ISL_991441, EPI_ISL_991442, EPI_ISL_991444, EPI_ISL_991445, EPI_ISL_991449, EPI_ISL_991452, EPI_ISL_991456, EPI_ISL_991457, EPI_ISL_991459, EPI_ISL_991461, EPI_ISL_991462, EPI_ISL_991466, EPI_ISL_991468, EPI_ISL_991469, EPI_ISL_991471, EPI_ISL_991472, EPI_ISL_991473, EPI_ISL_991474, EPI_ISL_991480, EPI_ISL_991484, EPI_ISL_991485, EPI_ISL_991487, EPI_ISL_991488, EPI_ISL_991490, EPI_ISL_991492, EPI_ISL_991495, EPI_ISL_991497, EPI_ISL_991504, EPI_ISL_991505, EPI_ISL_991507, EPI_ISL_991508, EPI_ISL_991509, EPI_ISL_991512, EPI_ISL_991513, EPI_ISL_991514, EPI_ISL_991516, EPI_ISL_991518, EPI_ISL_991519, EPI_ISL_991520, EPI_ISL_991521, EPI_ISL_991522, EPI_ISL_991524, EPI_ISL_991526, EPI_ISL_991529, EPI_ISL_991535, EPI_ISL_991538, EPI_ISL_991539, EPI_ISL_991542, EPI_ISL_991545, EPI_ISL_991550, EPI_ISL_991552, EPI_ISL_991554, EPI_ISL_991555, EPI_ISL_991557, EPI_ISL_991559, EPI_ISL_991560, EPI_ISL_991562, EPI_ISL_991563, EPI_ISL_991564                                                                                                                                                                                                                                                                                                                                                                                                                                                                                                                                                                                                                                                                                                                                                                                                                                                                                                                                                                                                                                                                                                                                                                                                                                                                                                                                                                                                                                                                                                                                                                                                                                                                                                                                                                                                                                                                                                                                                                                                                                                                                                                                                                                                                                                                                                                                                                                                                                                                                                                                                                                                                                                                                                                                                                                                                                                                                                                                                                                                                                                                                                                                                                 | see above | Lighthouse Lab in Glasgow                                                                                               | Wellcome Sanger Institute for the COVID-19 Genomics UK (COG-UK) Consortium | Harper VanSteenhouse, Yumi Kasai, David Gray, Carol Clugston, Anna Dominiczak and Alex Alderton, Roberto Amato, Sonia Goncalves, Ewan Harrison, David K. Jackson, Ian Johnston, Dominic Kwiatkowski, Cordelia Langford, John Sillitoe on behalf of the Wellcome Sanger Institute COVID-19 Surveillance Team                                                                                                                                                                                                                                                                                                                                                                             |
| EPI_ISL_991565, EPI_ISL_991595, EPI_ISL_991629, EPI_ISL_991637, EPI_ISL_991653, EPI_ISL_991680, EPI_ISL_991692, EPI_ISL_991694, EPI_ISL_991703, EPI_ISL_991715, EPI_ISL_991755, EPI_ISL_991781, EPI_ISL_991793, EPI_ISL_991817, EPI_ISL_991826, EPI_ISL_991834, EPI_ISL_991846, EPI_ISL_991848, EPI_ISL_991860, EPI_ISL_991873, EPI_ISL_991900                                                                                                                                                                                                                                                                                                                                                                                                                                                                                                                                                                                                                                                                                                                                                                                                                                                                                                                                                                                                                                                                                                                                                                                                                                                                                                                                                                                                                                                                                                                                                                                                                                                                                                                                                                                                                                                                                                                                                                                                                                                                                                                                                                                                                                                                                                                                                                                                                                                                                                                                                                                                                                                                                                                                                                                                                                                                                                                                                                                                                                                                                                                                                                                                                                                                                                                                                                                                                                                                                                                                                                                                                                                                                                                                                                                                                                                                                                                                                                                                                                                                                                                                                                                                                                                                                                                                                                                                                                                                                                                                 | see above | Lighthouse Lab in Alderley Park                                                                                         | Wellcome Sanger Institute for the COVID-19 Genomics UK (COG-UK) Consortium | Jacquelyn Wynn, Mairead Hyland, The Lighthouse Lab in Alderley Park and Alex Alderton, Roberto Amato, Sonia Goncalves, Ewan Harrison, David K. Jackson, Ian Johnston, Dominic Kwiatkowski, Cordelia Langford, John Sillitoe on behalf of the Wellcome Sanger Institute COVID-19 Surveillance Team                                                                                                                                                                                                                                                                                                                                                                                       |
| EPI_ISL_993004                                                                                                                                                                                                                                                                                                                                                                                                                                                                                                                                                                                                                                                                                                                                                                                                                                                                                                                                                                                                                                                                                                                                                                                                                                                                                                                                                                                                                                                                                                                                                                                                                                                                                                                                                                                                                                                                                                                                                                                                                                                                                                                                                                                                                                                                                                                                                                                                                                                                                                                                                                                                                                                                                                                                                                                                                                                                                                                                                                                                                                                                                                                                                                                                                                                                                                                                                                                                                                                                                                                                                                                                                                                                                                                                                                                                                                                                                                                                                                                                                                                                                                                                                                                                                                                                                                                                                                                                                                                                                                                                                                                                                                                                                                                                                                                                                                                                 |           | Lighthouse Lab in Alderley Park                                                                                         | Wellcome Sanger Institute for the COVID-19 Genomics UK (COG-UK) Consortium | Jacquelyn Wynn, Mairead Hyland, The Lighthouse Lab in Alderley Park and Alex Alderton, Roberto Amato, Sonia Goncalves, Ewan Harrison, David K. Jackson, Ian Johnston, Dominic Kwiatkowski, Cordelia Langford, John Sillitoe on behalf of the Wellcome Sanger Institute COVID-19 Surveillance Team ( <a href="http://www.sanger.ac.uk/covid-team">http://www.sanger.ac.uk/covid-team</a> )                                                                                                                                                                                                                                                                                               |
| EPI_ISL_996401, EPI_ISL_996408, EPI_ISL_996412, EPI_ISL_996456, EPI_ISL_996458, EPI_ISL_996462, EPI_ISL_996463, EPI_ISL_996469                                                                                                                                                                                                                                                                                                                                                                                                                                                                                                                                                                                                                                                                                                                                                                                                                                                                                                                                                                                                                                                                                                                                                                                                                                                                                                                                                                                                                                                                                                                                                                                                                                                                                                                                                                                                                                                                                                                                                                                                                                                                                                                                                                                                                                                                                                                                                                                                                                                                                                                                                                                                                                                                                                                                                                                                                                                                                                                                                                                                                                                                                                                                                                                                                                                                                                                                                                                                                                                                                                                                                                                                                                                                                                                                                                                                                                                                                                                                                                                                                                                                                                                                                                                                                                                                                                                                                                                                                                                                                                                                                                                                                                                                                                                                                 |           | University of Birmingham                                                                                                | COVID-19 Genomics UK (COG-UK) Consortium                                   | Institute of Microbiology, University of Birmingham: Claire McMurray, Joanne Stockton, Samuel Nicholls, Radoslaw Poplawski, Will Rowe, Josh Quick, Nicholas Loman. University of Birmingham Testing Laboratory: Celina M Whalley, Andrew Bosworth, Charlotte Poxon, Kasun Wanigasooriya, Oliver Pickles, Mike Kidd, Alex Richter, Andrew D Beggs PHE Heartlands Lab: Husam Osman, Andrew Bosworth. Queen Elizabeth Hospital: Anna Casey                                                                                                                                                                                                                                                 |
| EPI_ISL_996543, EPI_ISL_996544, EPI_ISL_996545, EPI_ISL_996546, EPI_ISL_996551, EPI_ISL_996552, EPI_ISL_996557, EPI_ISL_996595, EPI_ISL_996597                                                                                                                                                                                                                                                                                                                                                                                                                                                                                                                                                                                                                                                                                                                                                                                                                                                                                                                                                                                                                                                                                                                                                                                                                                                                                                                                                                                                                                                                                                                                                                                                                                                                                                                                                                                                                                                                                                                                                                                                                                                                                                                                                                                                                                                                                                                                                                                                                                                                                                                                                                                                                                                                                                                                                                                                                                                                                                                                                                                                                                                                                                                                                                                                                                                                                                                                                                                                                                                                                                                                                                                                                                                                                                                                                                                                                                                                                                                                                                                                                                                                                                                                                                                                                                                                                                                                                                                                                                                                                                                                                                                                                                                                                                                                 |           | University of Exeter                                                                                                    | COVID-19 Genomics UK (COG-UK) Consortium                                   | Ben Temperton, Aaron Jeffries, Michelle Michelsen, Joanna Warwick-Dugdale, Audrey Farbos, Robyn Manley, Stephen Michell, Jane Masoli                                                                                                                                                                                                                                                                                                                                                                                                                                                                                                                                                    |
| EPI_ISL_996673, EPI_ISL_996675, EPI_ISL_996677, EPI_ISL_996679, EPI_ISL_996687, EPI_ISL_996691, EPI_ISL_996693, EPI_ISL_996697, EPI_ISL_996699, EPI_ISL_996703, EPI_ISL_996705, EPI_ISL_996709, EPI_ISL_996713, EPI_ISL_996715, EPI_ISL_996717, EPI_ISL_996720, EPI_ISL_996722, EPI_ISL_996732, EPI_ISL_996734, EPI_ISL_996736, EPI_ISL_996865, EPI_ISL_996866, EPI_ISL_996867, EPI_ISL_996868, EPI_ISL_996869, EPI_ISL_996870, EPI_ISL_996871, EPI_ISL_996872, EPI_ISL_996873, EPI_ISL_996874, EPI_ISL_996875, EPI_ISL_996876, EPI_ISL_996877, EPI_ISL_996878, EPI_ISL_996879, EPI_ISL_996880, EPI_ISL_996881, EPI_ISL_996882, EPI_ISL_996883, EPI_ISL_996884, EPI_ISL_996885, EPI_ISL_996886, EPI_ISL_996887, EPI_ISL_996888, EPI_ISL_996889, EPI_ISL_996890, EPI_ISL_996891, EPI_ISL_996892, EPI_ISL_996894, EPI_ISL_996895, EPI_ISL_996896, EPI_ISL_996897, EPI_ISL_996898, EPI_ISL_996899, EPI_ISL_996900, EPI_ISL_996901, EPI_ISL_996902, EPI_ISL_996903, EPI_ISL_996904, EPI_ISL_996905, EPI_ISL_996906, EPI_ISL_996907, EPI_ISL_996908, EPI_ISL_996909, EPI_ISL_996910, EPI_ISL_996911, EPI_ISL_996912, EPI_ISL_996913, EPI_ISL_996914, EPI_ISL_996915, EPI_ISL_996916, EPI_ISL_996917, EPI_ISL_996918, EPI_ISL_996919, EPI_ISL_996920, EPI_ISL_996921, EPI_ISL_996922, EPI_ISL_996923, EPI_ISL_996924, EPI_ISL_996925, EPI_ISL_996926, EPI_ISL_996927, EPI_ISL_996928, EPI_ISL_996929, EPI_ISL_996930, EPI_ISL_996931, EPI_ISL_996932, EPI_ISL_996933, EPI_ISL_996934, EPI_ISL_996935, EPI_ISL_996936, EPI_ISL_996937, EPI_ISL_996938, EPI_ISL_996939, EPI_ISL_996940, EPI_ISL_996941, EPI_ISL_996942, EPI_ISL_996943, EPI_ISL_996944, EPI_ISL_996945, EPI_ISL_996946, EPI_ISL_996947, EPI_ISL_996948, EPI_ISL_996949, EPI_ISL_996950, EPI_ISL_996951, EPI_ISL_996952, EPI_ISL_996953, EPI_ISL_996954, EPI_ISL_996955, EPI_ISL_996956, EPI_ISL_996957, EPI_ISL_996958, EPI_ISL_996959, EPI_ISL_996960, EPI_ISL_996961, EPI_ISL_996962, EPI_ISL_996963, EPI_ISL_996964, EPI_ISL_996965, EPI_ISL_996966, EPI_ISL_996967, EPI_ISL_996968, EPI_ISL_996969, EPI_ISL_996970, EPI_ISL_996971, EPI_ISL_996972, EPI_ISL_996973, EPI_ISL_996974, EPI_ISL_996975, EPI_ISL_996976, EPI_ISL_996977, EPI_ISL_996978, EPI_ISL_996979, EPI_ISL_996980, EPI_ISL_996981, EPI_ISL_996982, EPI_ISL_996983, EPI_ISL_996984, EPI_ISL_996985, EPI_ISL_996986, EPI_ISL_996987, EPI_ISL_996988, EPI_ISL_996989, EPI_ISL_996990, EPI_ISL_996991, EPI_ISL_996992, EPI_ISL_996993, EPI_ISL_996994, EPI_ISL_996995, EPI_ISL_996996, EPI_ISL_996997, EPI_ISL_996998, EPI_ISL_996999, EPI_ISL_997000, EPI_ISL_997001, EPI_ISL_997002, EPI_ISL_997003, EPI_ISL_997004, EPI_ISL_997005, EPI_ISL_997006, EPI_ISL_997007, EPI_ISL_997008, EPI_ISL_997009, EPI_ISL_997010, EPI_ISL_997011, EPI_ISL_997012, EPI_ISL_997013, EPI_ISL_997014, EPI_ISL_997015, EPI_ISL_997016, EPI_ISL_997017, EPI_ISL_997018, EPI_ISL_997019, EPI_ISL_997020, EPI_ISL_997021, EPI_ISL_997022, EPI_ISL_997023, EPI_ISL_997024, EPI_ISL_997025, EPI_ISL_997026, EPI_ISL_997027, EPI_ISL_997028, EPI_ISL_997029, EPI_ISL_997030, EPI_ISL_997031, EPI_ISL_997032, EPI_ISL_997033, EPI_ISL_997034, EPI_ISL_997035, EPI_ISL_997036, EPI_ISL_997037, EPI_ISL_997038, EPI_ISL_997039, EPI_ISL_997040, EPI_ISL_997041, EPI_ISL_997042, EPI_ISL_997043, EPI_ISL_997044, EPI_ISL_997045, EPI_ISL_997046, EPI_ISL_997047, EPI_ISL_997048, EPI_ISL_997049                                                                                                                                                                                                                                                                                                                                                                                                                                                                                                                                                                                                                                                                                                                                                                                                                                                                                                                                                                                                                                                                                                                                                                                                                                                                                                                                                                                                                                                                                 | see above | Department of Pathology, University of Cambridge                                                                        | COVID-19 Genomics UK (COG-UK) Consortium                                   | Aminu S. Jahun, Yasmin Chaudhry, Iliana Georgana, Myra Hosmillo, Rhys Izuagbe, William L. Hamilton, Martin D. Curran, Surendra Parmar, Ian Goodfellow                                                                                                                                                                                                                                                                                                                                                                                                                                                                                                                                   |
| EPI_ISL_997052, EPI_ISL_997053, EPI_ISL_997054, EPI_ISL_997055, EPI_ISL_997056, EPI_ISL_997057, EPI_ISL_997058, EPI_ISL_997059, EPI_ISL_997060                                                                                                                                                                                                                                                                                                                                                                                                                                                                                                                                                                                                                                                                                                                                                                                                                                                                                                                                                                                                                                                                                                                                                                                                                                                                                                                                                                                                                                                                                                                                                                                                                                                                                                                                                                                                                                                                                                                                                                                                                                                                                                                                                                                                                                                                                                                                                                                                                                                                                                                                                                                                                                                                                                                                                                                                                                                                                                                                                                                                                                                                                                                                                                                                                                                                                                                                                                                                                                                                                                                                                                                                                                                                                                                                                                                                                                                                                                                                                                                                                                                                                                                                                                                                                                                                                                                                                                                                                                                                                                                                                                                                                                                                                                                                 |           | West of Scotland Specialist Virology Centre, NHSGGC / MRC-University of Glasgow Centre for Virus Research               | COVID-19 Genomics UK (COG-UK) Consortium                                   | Ana da Silva Filipe, Natasha Johnson, Kathy Smollett, Daniel Mair, Stephen Carmichael, Alice Broos, Lily Tong, Jenna Nichols, Kyriaki Nomikou; Sarah McDonald; Richard Orton, Joseph Hughes, Sreenu Vattipally, David L Robertson; Alasdair MacLean, Rory Gunson; Sharif Shaaban, Matthew Holden; Rachel Blacow, Guy Mollett, Kathy Li, James Shepherd, Antonia Ho, Emma Thomson                                                                                                                                                                                                                                                                                                        |
| EPI_ISL_997097, EPI_ISL_997098, EPI_ISL_997099, EPI_ISL_997100, EPI_ISL_997101, EPI_ISL_997102, EPI_ISL_997103, EPI_ISL_997132, EPI_ISL_997133, EPI_ISL_997134, EPI_ISL_997135, EPI_ISL_997136, EPI_ISL_997137, EPI_ISL_997138, EPI_ISL_997139                                                                                                                                                                                                                                                                                                                                                                                                                                                                                                                                                                                                                                                                                                                                                                                                                                                                                                                                                                                                                                                                                                                                                                                                                                                                                                                                                                                                                                                                                                                                                                                                                                                                                                                                                                                                                                                                                                                                                                                                                                                                                                                                                                                                                                                                                                                                                                                                                                                                                                                                                                                                                                                                                                                                                                                                                                                                                                                                                                                                                                                                                                                                                                                                                                                                                                                                                                                                                                                                                                                                                                                                                                                                                                                                                                                                                                                                                                                                                                                                                                                                                                                                                                                                                                                                                                                                                                                                                                                                                                                                                                                                                                 | see above | Virology Department, Royal Infirmary of Edinburgh, NHS Lothian / School of Biological Sciences, University of Edinburgh | COVID-19 Genomics UK (COG-UK) Consortium                                   | McHugh M, Dewar R, Cotton S, Rooke S, O'Toole Á, Scher E, Hill V, McCrone JT, Colquhoun R, Yu X, Jackson B, Rambaut A, Templeton K                                                                                                                                                                                                                                                                                                                                                                                                                                                                                                                                                      |
| EPI_ISL_997165, EPI_ISL_997166, EPI_ISL_997167, EPI_ISL_997168, EPI_ISL_997169, EPI_ISL_997170, EPI_ISL_997171, EPI_ISL_997172, EPI_ISL_997174, EPI_ISL_997176, EPI_ISL_997177, EPI_ISL_997178, EPI_ISL_997179, EPI_ISL_997186, EPI_ISL_997187, EPI_ISL_997266, EPI_ISL_997267, EPI_ISL_997268, EPI_ISL_997274, EPI_ISL_997282, EPI_ISL_997283, EPI_ISL_997284, EPI_ISL_997336, EPI_ISL_997338                                                                                                                                                                                                                                                                                                                                                                                                                                                                                                                                                                                                                                                                                                                                                                                                                                                                                                                                                                                                                                                                                                                                                                                                                                                                                                                                                                                                                                                                                                                                                                                                                                                                                                                                                                                                                                                                                                                                                                                                                                                                                                                                                                                                                                                                                                                                                                                                                                                                                                                                                                                                                                                                                                                                                                                                                                                                                                                                                                                                                                                                                                                                                                                                                                                                                                                                                                                                                                                                                                                                                                                                                                                                                                                                                                                                                                                                                                                                                                                                                                                                                                                                                                                                                                                                                                                                                                                                                                                                                 | see above | University of Exeter                                                                                                    | COVID-19 Genomics UK (COG-UK) Consortium                                   | Ben Temperton, Aaron Jeffries, Michelle Michelsen, Joanna Warwick-Dugdale, Audrey Farbos, Robyn Manley, Stephen Michell, Jane Masoli                                                                                                                                                                                                                                                                                                                                                                                                                                                                                                                                                    |
| EPI_ISL_997382, EPI_ISL_997393, EPI_ISL_997394, EPI_ISL_997395, EPI_ISL_997396, EPI_ISL_997397, EPI_ISL_997398, EPI_ISL_997399, EPI_ISL_997400, EPI_ISL_997401, EPI_ISL_997402, EPI_ISL_997403, EPI_ISL_997404, EPI_ISL_997407, EPI_ISL_997408, EPI_ISL_997409, EPI_ISL_997410, EPI_ISL_997411, EPI_ISL_997439, EPI_ISL_997442, EPI_ISL_997467, EPI_ISL_997468, EPI_ISL_997469, EPI_ISL_997470, EPI_ISL_997471, EPI_ISL_997472, EPI_ISL_997474, EPI_ISL_997475, EPI_ISL_997476, EPI_ISL_997477, EPI_ISL_997478, EPI_ISL_997479, EPI_ISL_997480, EPI_ISL_997481, EPI_ISL_997482                                                                                                                                                                                                                                                                                                                                                                                                                                                                                                                                                                                                                                                                                                                                                                                                                                                                                                                                                                                                                                                                                                                                                                                                                                                                                                                                                                                                                                                                                                                                                                                                                                                                                                                                                                                                                                                                                                                                                                                                                                                                                                                                                                                                                                                                                                                                                                                                                                                                                                                                                                                                                                                                                                                                                                                                                                                                                                                                                                                                                                                                                                                                                                                                                                                                                                                                                                                                                                                                                                                                                                                                                                                                                                                                                                                                                                                                                                                                                                                                                                                                                                                                                                                                                                                                                                 | see above | Liverpool Clinical Laboratories                                                                                         | COVID-19 Genomics UK (COG-UK) Consortium                                   | Sam Haldenby, Anita Lucaci, Steve Paterson, Julian Hiscox, Alistair Darby, M Almsaud, A Alrezaihi, Muhannad Alruwaili, Stuart D Armstrong, Jones Benjamin, Eleanor G Bentley, Anu Chawla, Jordan J Clark, Angela Cowell, Richard Eccles, Isabel Garcia-Dorival, Michael Gemmell, Alessandro Gerada, PKF Gilmore, Richard Gregory, Ximeng Han, Catherine Hartley, Margaret Hughes, Imren Turriza-Gomara, James Johnson, L Luu, Jenifer Manson, Charlotte Nelson, Elaine O'Toole, Cassie Olateju, Rebekah Penrice-Randal, Lucille Rainbow, N.P Randle, Trevor Ian Robinson, Parul Sharmar, Ghada T Shawli, James P Stewart, Neil Swainston, Ecaterina Vamos, Joanne Watts, Mark Whitehead |
| EPI_ISL_997615, EPI_ISL_997652, EPI_ISL_997653, EPI_ISL_997654, EPI_ISL_997655, EPI_ISL_997656, EPI_ISL_997662, EPI_ISL_997663, EPI_ISL_997664, EPI_ISL_997666, EPI_ISL_997667, EPI_ISL_997669, EPI_ISL_997670, EPI_ISL_997671, EPI_ISL_997673, EPI_ISL_997674                                                                                                                                                                                                                                                                                                                                                                                                                                                                                                                                                                                                                                                                                                                                                                                                                                                                                                                                                                                                                                                                                                                                                                                                                                                                                                                                                                                                                                                                                                                                                                                                                                                                                                                                                                                                                                                                                                                                                                                                                                                                                                                                                                                                                                                                                                                                                                                                                                                                                                                                                                                                                                                                                                                                                                                                                                                                                                                                                                                                                                                                                                                                                                                                                                                                                                                                                                                                                                                                                                                                                                                                                                                                                                                                                                                                                                                                                                                                                                                                                                                                                                                                                                                                                                                                                                                                                                                                                                                                                                                                                                                                                 |           |                                                                                                                         |                                                                            |                                                                                                                                                                                                                                                                                                                                                                                                                                                                                                                                                                                                                                                                                         |

|                                                                                                                                                                                                                                                                                                                                                                                                                                                                                                                                                                                                                                                                                                                                                                                |                                                                                                                                                                                                                     |                                                                           |                                                                                                                                                                                                                                                                                                                                                                                                                                                           |
|--------------------------------------------------------------------------------------------------------------------------------------------------------------------------------------------------------------------------------------------------------------------------------------------------------------------------------------------------------------------------------------------------------------------------------------------------------------------------------------------------------------------------------------------------------------------------------------------------------------------------------------------------------------------------------------------------------------------------------------------------------------------------------|---------------------------------------------------------------------------------------------------------------------------------------------------------------------------------------------------------------------|---------------------------------------------------------------------------|-----------------------------------------------------------------------------------------------------------------------------------------------------------------------------------------------------------------------------------------------------------------------------------------------------------------------------------------------------------------------------------------------------------------------------------------------------------|
| see above                                                                                                                                                                                                                                                                                                                                                                                                                                                                                                                                                                                                                                                                                                                                                                      | Barts Health NHS Trust                                                                                                                                                                                              | COVID-19 Genomics UK (COG-UK) Consortium                                  | CUTINO-MOGUEL, Maria-Teresa; HARRINGTON, David; OWOYEMI, Dola; KULASEGARAN-SHYLINI, Raghavendran; BROAD, Claire; KELE, Beatrix                                                                                                                                                                                                                                                                                                                            |
| EPI_ISL_997687, EPI_ISL_997691, EPI_ISL_997692, EPI_ISL_997753, EPI_ISL_997879, EPI_ISL_997880, EPI_ISL_997881, EPI_ISL_997887, EPI_ISL_997901, EPI_ISL_997904, EPI_ISL_997908, EPI_ISL_997909, EPI_ISL_997916, EPI_ISL_997922, EPI_ISL_997923                                                                                                                                                                                                                                                                                                                                                                                                                                                                                                                                 |                                                                                                                                                                                                                     |                                                                           |                                                                                                                                                                                                                                                                                                                                                                                                                                                           |
| see above                                                                                                                                                                                                                                                                                                                                                                                                                                                                                                                                                                                                                                                                                                                                                                      | University College London, Great Ormond Street Hospital for Children NHS Foundation Trust, Imperial College Healthcare NHS Trust                                                                                    | COVID-19 Genomics UK (COG-UK) Consortium                                  | Sergi Castellano, Rachel Williams, Mark Kristiansen, Paola Resende Silva, Sunando Roy, Tony Brooks, Helena Tutill, Paola Niola, Patricia Dyal, Charlotte Williams, Leysa Forrest, Yasmin Panchbhaya, Jacqueline Findlay, Samuel Weeks, Julianne Brown, Kathryn Harris, Paul Randell, James Price, Alison Holmes, Judith Breuer                                                                                                                            |
| EPI_ISL_998178, EPI_ISL_998179, EPI_ISL_998211, EPI_ISL_998229, EPI_ISL_998230, EPI_ISL_998280, EPI_ISL_998281, EPI_ISL_998283, EPI_ISL_998284, EPI_ISL_998285, EPI_ISL_998286, EPI_ISL_998288, EPI_ISL_998289, EPI_ISL_998290, EPI_ISL_998291, EPI_ISL_998292, EPI_ISL_998293, EPI_ISL_998294, EPI_ISL_998295, EPI_ISL_998296, EPI_ISL_998297, EPI_ISL_998298                                                                                                                                                                                                                                                                                                                                                                                                                 |                                                                                                                                                                                                                     |                                                                           |                                                                                                                                                                                                                                                                                                                                                                                                                                                           |
| see above                                                                                                                                                                                                                                                                                                                                                                                                                                                                                                                                                                                                                                                                                                                                                                      | Regional Virus Laboratory, Belfast Health and Social Care Trust                                                                                                                                                     | COVID-19 Genomics UK (COG-UK) Consortium                                  | Conall McCaughey, James McKenna, Tanya Curran, Susan Feeney, Alison Watt, Ciara Cox, Mairead Connor, Zoltan Molnar, David Simpson, Derek Fairley                                                                                                                                                                                                                                                                                                          |
| EPI_ISL_998484, EPI_ISL_998486, EPI_ISL_998487, EPI_ISL_998488, EPI_ISL_998489, EPI_ISL_998490, EPI_ISL_998491, EPI_ISL_998493, EPI_ISL_998494, EPI_ISL_998495, EPI_ISL_998497, EPI_ISL_998498, EPI_ISL_998500, EPI_ISL_998501, EPI_ISL_998502, EPI_ISL_998503, EPI_ISL_998559, EPI_ISL_998560, EPI_ISL_998561, EPI_ISL_998562, EPI_ISL_998563, EPI_ISL_998564, EPI_ISL_998565                                                                                                                                                                                                                                                                                                                                                                                                 |                                                                                                                                                                                                                     |                                                                           |                                                                                                                                                                                                                                                                                                                                                                                                                                                           |
| see above                                                                                                                                                                                                                                                                                                                                                                                                                                                                                                                                                                                                                                                                                                                                                                      | Northumbria University / South Tees Hospitals NHS Foundation Trust / North Cumbria Integrated Care NHS Foundation Trust / North Tees and Hartlepool NHS Foundation Trust / Newcastle Hospitals NHS Foundation Trust | COVID-19 Genomics UK (COG-UK) Consortium                                  | Darren L Smith,Andrew Nelson,Matthew Bashton,Greg R Young,Joshua Loh,John Allan,Mohammad A Tariq,Giles S Holt,Gary Black,Wen C Yew,Lynn Dover,Paul Baker,Steve Liggett,Sarah Essex,Jane Greenaway,Debra Padgett,Clive Graham,Garren Scott,Edward Barton,Emma Swindells,Brendan Payne,Jennifer Collins,Yusri Taha,Gary Eltringham                                                                                                                          |
| EPI_ISL_998772, EPI_ISL_998773, EPI_ISL_998776, EPI_ISL_998777, EPI_ISL_998780, EPI_ISL_998781, EPI_ISL_998785, EPI_ISL_998786, EPI_ISL_998788, EPI_ISL_998795, EPI_ISL_998798, EPI_ISL_998801, EPI_ISL_998802, EPI_ISL_998804, EPI_ISL_998806, EPI_ISL_998816, EPI_ISL_998817, EPI_ISL_998838, EPI_ISL_998839, EPI_ISL_998841, EPI_ISL_998842, EPI_ISL_998843, EPI_ISL_998844, EPI_ISL_998846, EPI_ISL_998847, EPI_ISL_998849, EPI_ISL_998853, EPI_ISL_998857, EPI_ISL_998858, EPI_ISL_998859, EPI_ISL_998860, EPI_ISL_998861, EPI_ISL_998864, EPI_ISL_998865, EPI_ISL_998866, EPI_ISL_998867, EPI_ISL_998870, EPI_ISL_998871, EPI_ISL_998872, EPI_ISL_998874, EPI_ISL_998875, EPI_ISL_998880, EPI_ISL_998881, EPI_ISL_998882, EPI_ISL_998884, EPI_ISL_998885, EPI_ISL_998888 |                                                                                                                                                                                                                     |                                                                           |                                                                                                                                                                                                                                                                                                                                                                                                                                                           |
| see above                                                                                                                                                                                                                                                                                                                                                                                                                                                                                                                                                                                                                                                                                                                                                                      | Quadram Institute Bioscience                                                                                                                                                                                        | COVID-19 Genomics UK (COG-UK) Consortium                                  | Dave J. Baker, Gemma L. Kay, Alp Aydin, Thanh Le-Viet, Steven Rudder, Ana P. Tedim, Anastasia Kolyva, Maria Diaz, Leonardo de Oliveira Martins, Nabil-Fareed Alikhan, Lizzie Meadows, Rachael Stanley, Ngozi Elumogo, Muhammed Yasir, Nicholas M. Thomson, Alexander J Trotter, Rachel Gilroy, Samuel Bloomfield, Claire Stuart, Andrew Bell, Reenesh Prakash, Samir Dervisevic, Alison E. Mather, John Wain, Mark Webber, Andrew J. Page, Justin O'Grady |
| EPI_ISL_998994, EPI_ISL_999302, EPI_ISL_999303, EPI_ISL_999307, EPI_ISL_999310, EPI_ISL_999311, EPI_ISL_999317, EPI_ISL_999318, EPI_ISL_999320, EPI_ISL_999322, EPI_ISL_999323, EPI_ISL_999324, EPI_ISL_999325, EPI_ISL_999326, EPI_ISL_999327, EPI_ISL_999329, EPI_ISL_999330, EPI_ISL_999331, EPI_ISL_999332, EPI_ISL_999335, EPI_ISL_999337, EPI_ISL_999339, EPI_ISL_999340, EPI_ISL_999342, EPI_ISL_999343, EPI_ISL_999344, EPI_ISL_999345, EPI_ISL_999346, EPI_ISL_999347, EPI_ISL_999484, EPI_ISL_999485, EPI_ISL_999486, EPI_ISL_999487, EPI_ISL_999488, EPI_ISL_999489, EPI_ISL_999490, EPI_ISL_999491, EPI_ISL_999492, EPI_ISL_999493, EPI_ISL_999494                                                                                                                 |                                                                                                                                                                                                                     |                                                                           |                                                                                                                                                                                                                                                                                                                                                                                                                                                           |
| see above                                                                                                                                                                                                                                                                                                                                                                                                                                                                                                                                                                                                                                                                                                                                                                      | Oxford Viromics, NDM, University of Oxford; Oxford University Hospitals; Basingstoke and North Hampshire Hospital                                                                                                   | COVID-19 Genomics UK (COG-UK) Consortium                                  | Tanya Golubchik, David Bonsall, George Macintyre, Amy Trebes, Mariateresa de Cesare, Catrin Moore, Alex Mobbs, Anita Justice, Robert Shaw, Monique Andersson, Timothy Peto, Emma Wise, Nathan Moore, Jessica Lynch, Nick Cortes, Matilde Mori, Stephen Kidd, David Buck, John Todd, Christophe Fraser                                                                                                                                                     |
| EPI_ISL_999646, EPI_ISL_999647, EPI_ISL_999652, EPI_ISL_999659, EPI_ISL_999664, EPI_ISL_999669, EPI_ISL_999683, EPI_ISL_999684, EPI_ISL_999685, EPI_ISL_999686, EPI_ISL_999687, EPI_ISL_999694, EPI_ISL_999695, EPI_ISL_999808                                                                                                                                                                                                                                                                                                                                                                                                                                                                                                                                                 |                                                                                                                                                                                                                     |                                                                           |                                                                                                                                                                                                                                                                                                                                                                                                                                                           |
| see above                                                                                                                                                                                                                                                                                                                                                                                                                                                                                                                                                                                                                                                                                                                                                                      | Originating lab: Wales Specialist Virology Centre Sequencing lab: Pathogen Genomics Unit                                                                                                                            | Public Health Wales Microbiology Cardiff Wales Specialist Virology Centre | Catherine Moore, Johnathan Evans, Laura Gifford, Malorie Perry, Simon Cottrell, Angela Marchbank, Alec Birchley, Alexander Adams, Amy Gaskin, Bree Gatica-Wilcox, Jason Coombes, Joel Southgate, Lauren Gilbert, Lee Graham, Nicole Pacchiarini, Sara Kumziene-Summerhayes, Sarah Taylor, Sophie Jones, Sara Rey, Matthew Bull, Joanne Watkins, Sally Corden, Tom Connor                                                                                  |
| EPI_ISL_999987                                                                                                                                                                                                                                                                                                                                                                                                                                                                                                                                                                                                                                                                                                                                                                 | Wales Specialist Virology Centre Sequencing lab: Pathogen Genomics Unit                                                                                                                                             | Public Health Wales Microbiology Cardiff Wales Specialist Virology Centre | Catherine Moore, Johnathan Evans, Laura Gifford, Malorie Perry, Simon Cottrell, Angela Marchbank, Alec Birchley, Alexander Adams, Amy Gaskin, Bree Gatica-Wilcox, Jason Coombes, Joel Southgate, Lauren Gilbert, Lee Graham, Nicole Pacchiarini, Sara Kumziene-Summerhayes, Sarah Taylor, Sophie Jones, Sara Rey, Matthew Bull, Joanne Watkins, Sally Corden, Tom Connor                                                                                  |
