# Supplementary material for: Inferring the Association between the Risk of COVID-19 Case Fatality and N501Y Substitution in SARS-CoV-2
Source: MDPI journal article supplement (doi:10.3390/v13040638), 2021-04-08
Supplement: s1 [file s1]

| Accession ID                                                                                                                                                                                                                                                                                                                                                                                                                                                                                                                                                                                                                                                                                                                                                                                                                                                                                                                                                                                                                                                                                                                                                                                                                                                                                                                                                                                                                                                                                                                                                                                                                                                                                                                                                                                                                                                                                                                                                                                                                                                                                                                                                                                                                                                                                                                                                                                                                                                                                                                                                                                                                                                                                                                                                                                                                                                                                                                                                                                                                                                                                                                                                                                                                                                                                                                                                                                                                                                                                                                                                                                                                                                                                                                                                                                                                                                                                                                                                                                                                                                                                                                                                                                                                                                                                                                                                                                                                                                                                                                                                                                                                                                                                                                                                                                                                                                                                                                                           | Originating Laboratory                                                                                                      | Submitting Laboratory                                                     | Authors                                                                                                                                                                                                                                                                                                                                                                                                                     |
|--------------------------------------------------------------------------------------------------------------------------------------------------------------------------------------------------------------------------------------------------------------------------------------------------------------------------------------------------------------------------------------------------------------------------------------------------------------------------------------------------------------------------------------------------------------------------------------------------------------------------------------------------------------------------------------------------------------------------------------------------------------------------------------------------------------------------------------------------------------------------------------------------------------------------------------------------------------------------------------------------------------------------------------------------------------------------------------------------------------------------------------------------------------------------------------------------------------------------------------------------------------------------------------------------------------------------------------------------------------------------------------------------------------------------------------------------------------------------------------------------------------------------------------------------------------------------------------------------------------------------------------------------------------------------------------------------------------------------------------------------------------------------------------------------------------------------------------------------------------------------------------------------------------------------------------------------------------------------------------------------------------------------------------------------------------------------------------------------------------------------------------------------------------------------------------------------------------------------------------------------------------------------------------------------------------------------------------------------------------------------------------------------------------------------------------------------------------------------------------------------------------------------------------------------------------------------------------------------------------------------------------------------------------------------------------------------------------------------------------------------------------------------------------------------------------------------------------------------------------------------------------------------------------------------------------------------------------------------------------------------------------------------------------------------------------------------------------------------------------------------------------------------------------------------------------------------------------------------------------------------------------------------------------------------------------------------------------------------------------------------------------------------------------------------------------------------------------------------------------------------------------------------------------------------------------------------------------------------------------------------------------------------------------------------------------------------------------------------------------------------------------------------------------------------------------------------------------------------------------------------------------------------------------------------------------------------------------------------------------------------------------------------------------------------------------------------------------------------------------------------------------------------------------------------------------------------------------------------------------------------------------------------------------------------------------------------------------------------------------------------------------------------------------------------------------------------------------------------------------------------------------------------------------------------------------------------------------------------------------------------------------------------------------------------------------------------------------------------------------------------------------------------------------------------------------------------------------------------------------------------------------------------------------------------------------------------------|-----------------------------------------------------------------------------------------------------------------------------|---------------------------------------------------------------------------|-----------------------------------------------------------------------------------------------------------------------------------------------------------------------------------------------------------------------------------------------------------------------------------------------------------------------------------------------------------------------------------------------------------------------------|
| EPI_ISL_1000023                                                                                                                                                                                                                                                                                                                                                                                                                                                                                                                                                                                                                                                                                                                                                                                                                                                                                                                                                                                                                                                                                                                                                                                                                                                                                                                                                                                                                                                                                                                                                                                                                                                                                                                                                                                                                                                                                                                                                                                                                                                                                                                                                                                                                                                                                                                                                                                                                                                                                                                                                                                                                                                                                                                                                                                                                                                                                                                                                                                                                                                                                                                                                                                                                                                                                                                                                                                                                                                                                                                                                                                                                                                                                                                                                                                                                                                                                                                                                                                                                                                                                                                                                                                                                                                                                                                                                                                                                                                                                                                                                                                                                                                                                                                                                                                                                                                                                                                                        | Wales Specialist Virology Centre Sequencing lab: Pathogen Genomics Unit                                                     | Public Health Wales Microbiology Cardiff Wales Specialist Virology Centre | Catherine Moore, Johnathan Evans, Laura Gifford, Malorie Perry, Simon Cottrell, Angela Marchbank, Alec Birchley, Alexander Adams, Amy Gaskin, Bree Gatica-Wilcox, Jason Coombes, Joel Southgate, Lauren Gilbert, Lee Graham, Nicole Pacchiarini, Sara Kumziene-Summerhayes, Sarah Taylor, Sophie Jones, Sara Rey, Matthew Bull, Joanne Watkins, Sally Corden, Tom Connor                                                    |
| EPI_ISL_1000237, EPI_ISL_1000238, EPI_ISL_1000239, EPI_ISL_1000255, EPI_ISL_1000264, EPI_ISL_1000266, EPI_ISL_1000275, EPI_ISL_1000276, EPI_ISL_1000279, EPI_ISL_1000283, EPI_ISL_1000284, EPI_ISL_1000285, EPI_ISL_1000287, EPI_ISL_1000325, EPI_ISL_1000326, EPI_ISL_1000327, EPI_ISL_1000328, EPI_ISL_1000329, EPI_ISL_1000330, EPI_ISL_1000332, EPI_ISL_1000333, EPI_ISL_1000334, EPI_ISL_1000335, EPI_ISL_1000337, EPI_ISL_1000338, EPI_ISL_1000339, EPI_ISL_1000340, EPI_ISL_1000341, EPI_ISL_1000342, EPI_ISL_1000343, EPI_ISL_1000344, EPI_ISL_1000345, EPI_ISL_1000346, EPI_ISL_1000347, EPI_ISL_1000348, EPI_ISL_1000349, EPI_ISL_1000350, EPI_ISL_1000351, EPI_ISL_1000352, EPI_ISL_1000353, EPI_ISL_1000354, EPI_ISL_1000355, EPI_ISL_1000356, EPI_ISL_1000357, EPI_ISL_1000358, EPI_ISL_1000359, EPI_ISL_1000361, EPI_ISL_1000362, EPI_ISL_1000363, EPI_ISL_1000364, EPI_ISL_1000365, EPI_ISL_1000366, EPI_ISL_1000367, EPI_ISL_1000368, EPI_ISL_1000369, EPI_ISL_1000370, EPI_ISL_1000371, EPI_ISL_1000372, EPI_ISL_1000373, EPI_ISL_1000374, EPI_ISL_1000375, EPI_ISL_1000376, EPI_ISL_1000377, EPI_ISL_1000378, EPI_ISL_1000379, EPI_ISL_1000380, EPI_ISL_1000381, EPI_ISL_1000382, EPI_ISL_1000383, EPI_ISL_1000384, EPI_ISL_1000385, EPI_ISL_1000386, EPI_ISL_1000387, EPI_ISL_1000388, EPI_ISL_1000389, EPI_ISL_1000390, EPI_ISL_1000391, EPI_ISL_1000392, EPI_ISL_1000393, EPI_ISL_1000394, EPI_ISL_1000395, EPI_ISL_1000396, EPI_ISL_1000397, EPI_ISL_1000398, EPI_ISL_1000399, EPI_ISL_1000400, EPI_ISL_1000401, EPI_ISL_1000402, EPI_ISL_1000403, EPI_ISL_1000404, EPI_ISL_1000405, EPI_ISL_1000406, EPI_ISL_1000407, EPI_ISL_1000408, EPI_ISL_1000409, EPI_ISL_1000410, EPI_ISL_1000411, EPI_ISL_1000412, EPI_ISL_1000413, EPI_ISL_1000414, EPI_ISL_1000415, EPI_ISL_1000416, EPI_ISL_1000417, EPI_ISL_1000418, EPI_ISL_1000419, EPI_ISL_1000420, EPI_ISL_1000421, EPI_ISL_1000422, EPI_ISL_1000423, EPI_ISL_1000424, EPI_ISL_1000425, EPI_ISL_1000426, EPI_ISL_1000427, EPI_ISL_1000428, EPI_ISL_1000429, EPI_ISL_1000430, EPI_ISL_1000431, EPI_ISL_1000432, EPI_ISL_1000433, EPI_ISL_1000434, EPI_ISL_1000435, EPI_ISL_1000436, EPI_ISL_1000437, EPI_ISL_1000438, EPI_ISL_1000439, EPI_ISL_1000440, EPI_ISL_1000441, EPI_ISL_1000442, EPI_ISL_1000443, EPI_ISL_1000444, EPI_ISL_1000445, EPI_ISL_1000446, EPI_ISL_1000447, EPI_ISL_1000448, EPI_ISL_1000449, EPI_ISL_1000450, EPI_ISL_1000451, EPI_ISL_1000452, EPI_ISL_1000453, EPI_ISL_1000454, EPI_ISL_1000455, EPI_ISL_1000456, EPI_ISL_1000457, EPI_ISL_1000458, EPI_ISL_1000459, EPI_ISL_1000460, EPI_ISL_1000461, EPI_ISL_1000462, EPI_ISL_1000463, EPI_ISL_1000464, EPI_ISL_1000465, EPI_ISL_1000466, EPI_ISL_1000467, EPI_ISL_1000468, EPI_ISL_1000469, EPI_ISL_1000470, EPI_ISL_1000471, EPI_ISL_1000472, EPI_ISL_1000473, EPI_ISL_1000474, EPI_ISL_1000475, EPI_ISL_1000476, EPI_ISL_1000477, EPI_ISL_1000478, EPI_ISL_1000479, EPI_ISL_1000480, EPI_ISL_1000481, EPI_ISL_1000482, EPI_ISL_1000483, EPI_ISL_1000484, EPI_ISL_1000485, EPI_ISL_1000486, EPI_ISL_1000487, EPI_ISL_1000488, EPI_ISL_1000489, EPI_ISL_1000490, EPI_ISL_1000491, EPI_ISL_1000492, EPI_ISL_1000493, EPI_ISL_1000494, EPI_ISL_1000495, EPI_ISL_1000496, EPI_ISL_1000497, EPI_ISL_1000498, EPI_ISL_1000499, EPI_ISL_1000500, EPI_ISL_1000501, EPI_ISL_1000502, EPI_ISL_1000503, EPI_ISL_1000504, EPI_ISL_1000505, EPI_ISL_1000506, EPI_ISL_1000507, EPI_ISL_1000508, EPI_ISL_1000509, EPI_ISL_1000510, EPI_ISL_1000511, EPI_ISL_1000512, EPI_ISL_1000513, EPI_ISL_1000514, EPI_ISL_1000515, EPI_ISL_1000516, EPI_ISL_1000517, EPI_ISL_1000518, EPI_ISL_1000519, EPI_ISL_1000520, EPI_ISL_1000521, EPI_ISL_1000522, EPI_ISL_1000523, EPI_ISL_1000524, EPI_ISL_1000525, EPI_ISL_1000526, EPI_ISL_1000527, EPI_ISL_1000528, EPI_ISL_1000529, EPI_ISL_1000530, EPI_ISL_1000531, EPI_ISL_1000532, EPI_ISL_1000533, EPI_ISL_1000534, EPI_ISL_1000535, EPI_ISL_1000536, EPI_ISL_1000537, EPI_ISL_1000538, EPI_ISL_1000539, EPI_ISL_1000540, EPI_ISL_1000541, EPI_ISL_1000542, EPI_ISL_1000543, EPI_ISL_1000544, EPI_ISL_1000545, EPI_ISL_1000546, EPI_ISL_1000547, EPI_ISL_1000548, EPI_ISL_1000549, EPI_ISL_1000550, EPI_ISL_1000551, EPI_ISL_1000552, EPI_ISL_1000553, EPI_ISL_1000554, EPI_ISL_1000555, EPI_ISL_1000556, EPI_ISL_1000557, EPI_ISL_1000558, EPI_ISL_1000559, EPI_ISL_1000560, EPI_ISL_1000561, EPI_ISL_1000562, EPI_ISL_1000563, EPI_ISL_1000564, EPI_ISL_1000565, EPI_ISL_1000566, EPI_ISL_1000567, EPI_ISL_1000568, EPI_ISL_1000569, EPI_ISL_1000570, EPI_ISL_1000571, EPI_ISL_1000572, EPI_ISL_1000573, EPI_ISL_1000574, EPI_ISL_1000575, EPI_ISL_1000576, EPI_ISL_1000577, EPI_ISL_1000578, EPI_ISL_1000579, EPI_ISL_1000580, EPI_ISL_1000581, EPI_ISL_1000582, EPI_ISL_1000583, EPI_ISL_1000584, EPI_ISL_1000585, EPI_ISL_1000586, EPI_ISL_1000587, EPI_ISL_1000588, EPI_ISL_1000589, EPI_ISL_1000590, EPI_ISL_1000591, EPI_ISL_1000592, EPI_ISL_1000593, EPI_ISL_1000594 | Angela Beckett, Salman Goudarzi, Christopher Fearn, Kate Cook, Katie Loveson, Sharon Glaysher, Scott Elliott, Samuel Robson |                                                                           |                                                                                                                                                                                                                                                                                                                                                                                                                             |
| see above                                                                                                                                                                                                                                                                                                                                                                                                                                                                                                                                                                                                                                                                                                                                                                                                                                                                                                                                                                                                                                                                                                                                                                                                                                                                                                                                                                                                                                                                                                                                                                                                                                                                                                                                                                                                                                                                                                                                                                                                                                                                                                                                                                                                                                                                                                                                                                                                                                                                                                                                                                                                                                                                                                                                                                                                                                                                                                                                                                                                                                                                                                                                                                                                                                                                                                                                                                                                                                                                                                                                                                                                                                                                                                                                                                                                                                                                                                                                                                                                                                                                                                                                                                                                                                                                                                                                                                                                                                                                                                                                                                                                                                                                                                                                                                                                                                                                                                                                              | Centre for Enzyme Innovation, University of Portsmouth / Translational Research Laboratory, Portsmouth Hospitals NHS Trust  | COVID-19 Genomics UK (COG-UK) Consortium                                  |                                                                                                                                                                                                                                                                                                                                                                                                                             |
| EPI_ISL_1047015, EPI_ISL_1047065                                                                                                                                                                                                                                                                                                                                                                                                                                                                                                                                                                                                                                                                                                                                                                                                                                                                                                                                                                                                                                                                                                                                                                                                                                                                                                                                                                                                                                                                                                                                                                                                                                                                                                                                                                                                                                                                                                                                                                                                                                                                                                                                                                                                                                                                                                                                                                                                                                                                                                                                                                                                                                                                                                                                                                                                                                                                                                                                                                                                                                                                                                                                                                                                                                                                                                                                                                                                                                                                                                                                                                                                                                                                                                                                                                                                                                                                                                                                                                                                                                                                                                                                                                                                                                                                                                                                                                                                                                                                                                                                                                                                                                                                                                                                                                                                                                                                                                                       | University of Birmingham                                                                                                    | COVID-19 Genomics UK (COG-UK) Consortium                                  | Institute of Microbiology, University of Birmingham: Claire McMurray, Joanne Stockton, Samuel Nicholls, Radoslaw Poplawski, Will Rowe, Josh Quick, Nicholas Loman. University of Birmingham Testing Laboratory: Celina M Whalley, Andrew Bosworth, Charlotte Poxon, Kasun Wanigasooriya, Oliver Pickles, Mike Kidd, Alex Richter, Andrew D Beggs PHE Heartlands Lab: Husam Osman, Andrew Bosworth. Queen Elizabeth Hospital |

|                                                                                                                                                                                                                                                                                                                                                                                                                                                                                                                                                                                                                                                                                                                                                                                                                                                                                                                                                                                                                                                                                                                                                                                                                                                                                                                                                                                                                                                                                                                                                                                                                                                                                                                                                                                                                                                                                                                                                                                                                                                                                                                                                                                                                                                                                                                                                                                                                                                                                                                                                                                                                                                                                                                                           |                                                                                                                                                                                                                     |                                                                           |                                                                                                                                                                                                                                                                                                                                                                                                                                                           |
|-------------------------------------------------------------------------------------------------------------------------------------------------------------------------------------------------------------------------------------------------------------------------------------------------------------------------------------------------------------------------------------------------------------------------------------------------------------------------------------------------------------------------------------------------------------------------------------------------------------------------------------------------------------------------------------------------------------------------------------------------------------------------------------------------------------------------------------------------------------------------------------------------------------------------------------------------------------------------------------------------------------------------------------------------------------------------------------------------------------------------------------------------------------------------------------------------------------------------------------------------------------------------------------------------------------------------------------------------------------------------------------------------------------------------------------------------------------------------------------------------------------------------------------------------------------------------------------------------------------------------------------------------------------------------------------------------------------------------------------------------------------------------------------------------------------------------------------------------------------------------------------------------------------------------------------------------------------------------------------------------------------------------------------------------------------------------------------------------------------------------------------------------------------------------------------------------------------------------------------------------------------------------------------------------------------------------------------------------------------------------------------------------------------------------------------------------------------------------------------------------------------------------------------------------------------------------------------------------------------------------------------------------------------------------------------------------------------------------------------------|---------------------------------------------------------------------------------------------------------------------------------------------------------------------------------------------------------------------|---------------------------------------------------------------------------|-----------------------------------------------------------------------------------------------------------------------------------------------------------------------------------------------------------------------------------------------------------------------------------------------------------------------------------------------------------------------------------------------------------------------------------------------------------|
| see above                                                                                                                                                                                                                                                                                                                                                                                                                                                                                                                                                                                                                                                                                                                                                                                                                                                                                                                                                                                                                                                                                                                                                                                                                                                                                                                                                                                                                                                                                                                                                                                                                                                                                                                                                                                                                                                                                                                                                                                                                                                                                                                                                                                                                                                                                                                                                                                                                                                                                                                                                                                                                                                                                                                                 | University College London, Great Ormond Street Hospital for Children NHS Foundation Trust, Imperial College Healthcare NHS Trust                                                                                    | COVID-19 Genomics UK (COG-UK) Consortium                                  | Sergi Castellano, Rachel Williams, Mark Kristiansen, Paola Resende Silva, Sunando Roy, Tony Brooks, Helena Tutill, Paola Niola, Patricia Dyal, Charlotte Williams, Leysa Forrest, Yasmin Panchbhaya, Jacqueline Findlay, Samuel Weeks, Julianne Brown, Kathryn Harris, Paul Randell, James Price, Alison Holmes, Judith Breuer                                                                                                                            |
| EPI_ISL_1104931, EPI_ISL_1104937, EPI_ISL_1104938, EPI_ISL_1104949, EPI_ISL_1104972, EPI_ISL_1104973, EPI_ISL_1104975, EPI_ISL_1104976, EPI_ISL_1104978, EPI_ISL_1104981, EPI_ISL_1104982, EPI_ISL_1104986, EPI_ISL_1104988, EPI_ISL_1104990, EPI_ISL_1104991, EPI_ISL_1104992, EPI_ISL_1104997, EPI_ISL_1104998, EPI_ISL_1104999, EPI_ISL_1105000, EPI_ISL_1105001, EPI_ISL_1105005, EPI_ISL_1105009, EPI_ISL_1105010, EPI_ISL_1105011, EPI_ISL_1105018, EPI_ISL_1105026, EPI_ISL_1105027, EPI_ISL_1105034, EPI_ISL_1105035, EPI_ISL_1105169, EPI_ISL_1105255, EPI_ISL_1105283, EPI_ISL_1105301, EPI_ISL_1105302, EPI_ISL_1105310                                                                                                                                                                                                                                                                                                                                                                                                                                                                                                                                                                                                                                                                                                                                                                                                                                                                                                                                                                                                                                                                                                                                                                                                                                                                                                                                                                                                                                                                                                                                                                                                                                                                                                                                                                                                                                                                                                                                                                                                                                                                                                        |                                                                                                                                                                                                                     |                                                                           |                                                                                                                                                                                                                                                                                                                                                                                                                                                           |
| see above                                                                                                                                                                                                                                                                                                                                                                                                                                                                                                                                                                                                                                                                                                                                                                                                                                                                                                                                                                                                                                                                                                                                                                                                                                                                                                                                                                                                                                                                                                                                                                                                                                                                                                                                                                                                                                                                                                                                                                                                                                                                                                                                                                                                                                                                                                                                                                                                                                                                                                                                                                                                                                                                                                                                 | University College London Hospital                                                                                                                                                                                  | COVID-19 Genomics UK (COG-UK) Consortium                                  | Judith Heaney, Matthew Byott, Catherine Houlihan, Dan Frampton, Stuart Kirk, Moira Spyer and Eleni Nastouli                                                                                                                                                                                                                                                                                                                                               |
| EPI_ISL_1105450                                                                                                                                                                                                                                                                                                                                                                                                                                                                                                                                                                                                                                                                                                                                                                                                                                                                                                                                                                                                                                                                                                                                                                                                                                                                                                                                                                                                                                                                                                                                                                                                                                                                                                                                                                                                                                                                                                                                                                                                                                                                                                                                                                                                                                                                                                                                                                                                                                                                                                                                                                                                                                                                                                                           | University College London, Great Ormond Street Hospital for Children NHS Foundation Trust, Imperial College Healthcare NHS Trust                                                                                    | COVID-19 Genomics UK (COG-UK) Consortium                                  | Sergi Castellano, Rachel Williams, Mark Kristiansen, Paola Resende Silva, Sunando Roy, Tony Brooks, Helena Tutill, Paola Niola, Patricia Dyal, Charlotte Williams, Leysa Forrest, Yasmin Panchbhaya, Jacqueline Findlay, Samuel Weeks, Julianne Brown, Kathryn Harris, Paul Randell, James Price, Alison Holmes, Judith Breuer                                                                                                                            |
| EPI_ISL_1105657, EPI_ISL_1105711, EPI_ISL_1105712, EPI_ISL_1105716, EPI_ISL_1105717, EPI_ISL_1105720, EPI_ISL_1105724, EPI_ISL_1105725, EPI_ISL_1105727, EPI_ISL_1105728                                                                                                                                                                                                                                                                                                                                                                                                                                                                                                                                                                                                                                                                                                                                                                                                                                                                                                                                                                                                                                                                                                                                                                                                                                                                                                                                                                                                                                                                                                                                                                                                                                                                                                                                                                                                                                                                                                                                                                                                                                                                                                                                                                                                                                                                                                                                                                                                                                                                                                                                                                  | Northumbria University / South Tees Hospitals NHS Foundation Trust / North Cumbria Integrated Care NHS Foundation Trust / North Tees and Hartlepool NHS Foundation Trust / Newcastle Hospitals NHS Foundation Trust | COVID-19 Genomics UK (COG-UK) Consortium                                  | Darren L Smith,Andrew Nelson,Matthew Bashton,Greg R Young,Joshua Loh,John Allan,Mohammad A Tariq,Giles S Holt,Gary Black,Wen C Yew,Lynn Dover,Paul Baker,Steve Liggett,Sarah Essex,Jane Greenaway,Debra Padgett,Clive Graham,Garren Scott,Edward Barton,Emma Swindells,Brendan Payne,Jennifer Collins,Yusri Taha,Gary Eltringham                                                                                                                          |
| EPI_ISL_1106644                                                                                                                                                                                                                                                                                                                                                                                                                                                                                                                                                                                                                                                                                                                                                                                                                                                                                                                                                                                                                                                                                                                                                                                                                                                                                                                                                                                                                                                                                                                                                                                                                                                                                                                                                                                                                                                                                                                                                                                                                                                                                                                                                                                                                                                                                                                                                                                                                                                                                                                                                                                                                                                                                                                           | Originating lab: Wales Specialist Virology Centre Sequencing lab: Pathogen Genomics Unit                                                                                                                            | Public Health Wales Microbiology Cardiff Wales Specialist Virology Centre | Catherine Moore, Johnathan Evans, Laura Gifford, Malorie Perry, Simon Cottrell, Angela Marchbank, Alec Birchley, Alexander Adams, Amy Gaskin, Bree Gatica-Wilcox, Jason Coombes, Joel Southgate, Lauren Gilbert, Lee Graham, Nicole Pacchiariini, Sara Kumziene-Summerhayes, Sarah Taylor, Sophie Jones, Sara Rey, Matthew Bull, Joanne Watkins, Sally Corden, Tom Connor                                                                                 |
| EPI_ISL_1107544, EPI_ISL_1107545, EPI_ISL_1107546, EPI_ISL_1107547, EPI_ISL_1107548, EPI_ISL_1107549, EPI_ISL_1107550, EPI_ISL_1107551, EPI_ISL_1107552, EPI_ISL_1107553, EPI_ISL_1107554, EPI_ISL_1107555, EPI_ISL_1107556, EPI_ISL_1107557, EPI_ISL_1107558, EPI_ISL_1107559, EPI_ISL_1107560, EPI_ISL_1107561, EPI_ISL_1107562, EPI_ISL_1107563, EPI_ISL_1107564, EPI_ISL_1107565, EPI_ISL_1107566, EPI_ISL_1107567, EPI_ISL_1107568, EPI_ISL_1107569, EPI_ISL_1107570, EPI_ISL_1107571, EPI_ISL_1107572, EPI_ISL_1107573, EPI_ISL_1107574, EPI_ISL_1107575, EPI_ISL_1107576, EPI_ISL_1107577, EPI_ISL_1107578, EPI_ISL_1107579, EPI_ISL_1107580, EPI_ISL_1107581, EPI_ISL_1107582, EPI_ISL_1107583, EPI_ISL_1107584, EPI_ISL_1107585, EPI_ISL_1107586, EPI_ISL_1107587, EPI_ISL_1107588, EPI_ISL_1107589, EPI_ISL_1107590, EPI_ISL_1107591, EPI_ISL_1107592, EPI_ISL_1107593, EPI_ISL_1107594, EPI_ISL_1107595, EPI_ISL_1107596, EPI_ISL_1107597, EPI_ISL_1107598, EPI_ISL_1107599, EPI_ISL_1107600, EPI_ISL_1107601, EPI_ISL_1107602, EPI_ISL_1107603, EPI_ISL_1107604, EPI_ISL_1107605, EPI_ISL_1107606, EPI_ISL_1107607, EPI_ISL_1107608, EPI_ISL_1107609, EPI_ISL_1107610, EPI_ISL_1107611, EPI_ISL_1107612, EPI_ISL_1107615, EPI_ISL_1107616, EPI_ISL_1107617, EPI_ISL_1107618, EPI_ISL_1107619, EPI_ISL_1107620, EPI_ISL_1107621, EPI_ISL_1107622, EPI_ISL_1107623, EPI_ISL_1107624, EPI_ISL_1107625, EPI_ISL_1107626, EPI_ISL_1107627, EPI_ISL_1107628, EPI_ISL_1107629, EPI_ISL_1107630, EPI_ISL_1107700, EPI_ISL_1107701, EPI_ISL_1107702, EPI_ISL_1107703, EPI_ISL_1107704, EPI_ISL_1107705, EPI_ISL_1107706, EPI_ISL_1107707, EPI_ISL_1107709, EPI_ISL_1107710, EPI_ISL_1107711, EPI_ISL_1107712                                                                                                                                                                                                                                                                                                                                                                                                                                                                                                                                                                                                                                                                                                                                                                                                                                                                                                                                                                                                                           |                                                                                                                                                                                                                     |                                                                           |                                                                                                                                                                                                                                                                                                                                                                                                                                                           |
| see above                                                                                                                                                                                                                                                                                                                                                                                                                                                                                                                                                                                                                                                                                                                                                                                                                                                                                                                                                                                                                                                                                                                                                                                                                                                                                                                                                                                                                                                                                                                                                                                                                                                                                                                                                                                                                                                                                                                                                                                                                                                                                                                                                                                                                                                                                                                                                                                                                                                                                                                                                                                                                                                                                                                                 | Centre for Enzyme Innovation, University of Portsmouth / Translational Research Laboratory, Portsmouth Hospitals NHS Trust                                                                                          | COVID-19 Genomics UK (COG-UK) Consortium                                  | Angela Beckett,Salman Goudarzi,Christopher Fearn,Kate Cook,Katie Loveson,Sharon Glaysher,Scott Elliott,Samuel Robson                                                                                                                                                                                                                                                                                                                                      |
| EPI_ISL_1177643, EPI_ISL_1177644, EPI_ISL_1177645, EPI_ISL_1177646, EPI_ISL_1177648, EPI_ISL_1177650, EPI_ISL_1177676                                                                                                                                                                                                                                                                                                                                                                                                                                                                                                                                                                                                                                                                                                                                                                                                                                                                                                                                                                                                                                                                                                                                                                                                                                                                                                                                                                                                                                                                                                                                                                                                                                                                                                                                                                                                                                                                                                                                                                                                                                                                                                                                                                                                                                                                                                                                                                                                                                                                                                                                                                                                                     | Department of Pathology, University of Cambridge                                                                                                                                                                    | COVID-19 Genomics UK (COG-UK) Consortium                                  | Aminu S. Jahun, Yasmin Chaudhry, Iliana Georgana, Myra Hosmillo, Rhys Izuagbe, William L. Hamilton, Martin D. Curran, Surendra Parmar, Ian Goodfellow                                                                                                                                                                                                                                                                                                     |
| EPI_ISL_1177785                                                                                                                                                                                                                                                                                                                                                                                                                                                                                                                                                                                                                                                                                                                                                                                                                                                                                                                                                                                                                                                                                                                                                                                                                                                                                                                                                                                                                                                                                                                                                                                                                                                                                                                                                                                                                                                                                                                                                                                                                                                                                                                                                                                                                                                                                                                                                                                                                                                                                                                                                                                                                                                                                                                           | University of Exeter                                                                                                                                                                                                | COVID-19 Genomics UK (COG-UK) Consortium                                  | Ben Temperton,Aaron Jeffries,Michelle Michelsen,Joanna Warwick-Dugdale,Audrey Farbos,Robyn Manley,Stephen Michell,Jane Masoli                                                                                                                                                                                                                                                                                                                             |
| EPI_ISL_1179680, EPI_ISL_1179733, EPI_ISL_1179734, EPI_ISL_1179736, EPI_ISL_1179763, EPI_ISL_1179779, EPI_ISL_1179781, EPI_ISL_1179786, EPI_ISL_1179799, EPI_ISL_1179801, EPI_ISL_1179805, EPI_ISL_1179807, EPI_ISL_1179810, EPI_ISL_1179826, EPI_ISL_1179835, EPI_ISL_1179840, EPI_ISL_1179841, EPI_ISL_1179842, EPI_ISL_1179844, EPI_ISL_1179845, EPI_ISL_1179846, EPI_ISL_1179847, EPI_ISL_1179848, EPI_ISL_1179849, EPI_ISL_1179850, EPI_ISL_1179851                                                                                                                                                                                                                                                                                                                                                                                                                                                                                                                                                                                                                                                                                                                                                                                                                                                                                                                                                                                                                                                                                                                                                                                                                                                                                                                                                                                                                                                                                                                                                                                                                                                                                                                                                                                                                                                                                                                                                                                                                                                                                                                                                                                                                                                                                  |                                                                                                                                                                                                                     |                                                                           |                                                                                                                                                                                                                                                                                                                                                                                                                                                           |
| see above                                                                                                                                                                                                                                                                                                                                                                                                                                                                                                                                                                                                                                                                                                                                                                                                                                                                                                                                                                                                                                                                                                                                                                                                                                                                                                                                                                                                                                                                                                                                                                                                                                                                                                                                                                                                                                                                                                                                                                                                                                                                                                                                                                                                                                                                                                                                                                                                                                                                                                                                                                                                                                                                                                                                 | Centre for Enzyme Innovation, University of Portsmouth / Translational Research Laboratory, Portsmouth Hospitals NHS Trust                                                                                          | COVID-19 Genomics UK (COG-UK) Consortium                                  | Angela Beckett,Salman Goudarzi,Christopher Fearn,Kate Cook,Katie Loveson,Sharon Glaysheer,Scott Elliott,Samuel Robson                                                                                                                                                                                                                                                                                                                                     |
| EPI_ISL_1247369, EPI_ISL_1247370, EPI_ISL_1247371, EPI_ISL_1247374, EPI_ISL_1247375, EPI_ISL_1247377, EPI_ISL_1247378, EPI_ISL_1247379, EPI_ISL_1247380, EPI_ISL_1247382, EPI_ISL_1247383, EPI_ISL_1247384, EPI_ISL_1247385, EPI_ISL_1247387, EPI_ISL_1247388, EPI_ISL_1247389, EPI_ISL_1247390, EPI_ISL_1247392, EPI_ISL_1247393, EPI_ISL_1247396, EPI_ISL_1247397, EPI_ISL_1247398, EPI_ISL_1247399, EPI_ISL_1247400, EPI_ISL_1247401, EPI_ISL_1247402, EPI_ISL_1247403, EPI_ISL_1247404                                                                                                                                                                                                                                                                                                                                                                                                                                                                                                                                                                                                                                                                                                                                                                                                                                                                                                                                                                                                                                                                                                                                                                                                                                                                                                                                                                                                                                                                                                                                                                                                                                                                                                                                                                                                                                                                                                                                                                                                                                                                                                                                                                                                                                                |                                                                                                                                                                                                                     |                                                                           |                                                                                                                                                                                                                                                                                                                                                                                                                                                           |
| see above                                                                                                                                                                                                                                                                                                                                                                                                                                                                                                                                                                                                                                                                                                                                                                                                                                                                                                                                                                                                                                                                                                                                                                                                                                                                                                                                                                                                                                                                                                                                                                                                                                                                                                                                                                                                                                                                                                                                                                                                                                                                                                                                                                                                                                                                                                                                                                                                                                                                                                                                                                                                                                                                                                                                 | Quadram Institute Bioscience                                                                                                                                                                                        | COVID-19 Genomics UK (COG-UK) Consortium                                  | Dave J. Baker, Gemma L. Kay, Alp Aydin, Thanh Le-Viet, Steven Rudder, Ana P. Tedim, Anastasia Kolyva, Maria Diaz, Leonardo de Oliveira Martins, Nabil-Fareed Alikhan, Lizzie Meadows, Rachael Stanley, Ngozi Elumogo, Muhammed Yasir, Nicholas M. Thomson, Alexander J Trotter, Rachel Gilroy, Samuel Bloomfield, Claire Stuart, Andrew Bell, Reenesh Prakash, Samir Dervisevic, Alison E. Mather, John Wain, Mark Webber, Andrew J. Page, Justin O'Grady |
| EPI_ISL_1247405, EPI_ISL_1247406, EPI_ISL_1247407, EPI_ISL_1247408, EPI_ISL_1247409, EPI_ISL_1247410, EPI_ISL_1247411, EPI_ISL_1247412, EPI_ISL_1247413, EPI_ISL_1247414, EPI_ISL_1247416, EPI_ISL_1247417, EPI_ISL_1247418, EPI_ISL_1247419, EPI_ISL_1247420, EPI_ISL_1247421, EPI_ISL_1247422, EPI_ISL_1247423, EPI_ISL_1247424, EPI_ISL_1247425, EPI_ISL_1247426, EPI_ISL_1247427, EPI_ISL_1247428, EPI_ISL_1247429, EPI_ISL_1247431, EPI_ISL_1247432                                                                                                                                                                                                                                                                                                                                                                                                                                                                                                                                                                                                                                                                                                                                                                                                                                                                                                                                                                                                                                                                                                                                                                                                                                                                                                                                                                                                                                                                                                                                                                                                                                                                                                                                                                                                                                                                                                                                                                                                                                                                                                                                                                                                                                                                                  |                                                                                                                                                                                                                     |                                                                           |                                                                                                                                                                                                                                                                                                                                                                                                                                                           |
| see above                                                                                                                                                                                                                                                                                                                                                                                                                                                                                                                                                                                                                                                                                                                                                                                                                                                                                                                                                                                                                                                                                                                                                                                                                                                                                                                                                                                                                                                                                                                                                                                                                                                                                                                                                                                                                                                                                                                                                                                                                                                                                                                                                                                                                                                                                                                                                                                                                                                                                                                                                                                                                                                                                                                                 | University of Birmingham                                                                                                                                                                                            | COVID-19 Genomics UK (COG-UK) Consortium                                  | Institute of Microbiology, University of Birmingham: Claire McMurray, Joanne Stockton, Samuel Nicholls, Radoslaw Poplawski, Will Rowe, Josh Quick, Nicholas Loman. University of Birmingham Testing Laboratory: Celina M Whalley, Andrew Bosworth, Charlotte Poxon, Kasun Wanigasooriya, Oliver Pickles, Mike Kidd, Alex Richter, Andrew D Beggs PHE Heartlands Lab: Husam Osman, Andrew Bosworth. Queen Elizabeth Hospital: Anna Casey                   |
| EPI_ISL_1247572, EPI_ISL_1247575, EPI_ISL_1247577, EPI_ISL_1247579, EPI_ISL_1247593, EPI_ISL_1247602, EPI_ISL_1247604, EPI_ISL_1247606, EPI_ISL_1247607, EPI_ISL_1247609, EPI_ISL_1247610, EPI_ISL_1247623, EPI_ISL_1247630                                                                                                                                                                                                                                                                                                                                                                                                                                                                                                                                                                                                                                                                                                                                                                                                                                                                                                                                                                                                                                                                                                                                                                                                                                                                                                                                                                                                                                                                                                                                                                                                                                                                                                                                                                                                                                                                                                                                                                                                                                                                                                                                                                                                                                                                                                                                                                                                                                                                                                               |                                                                                                                                                                                                                     |                                                                           |                                                                                                                                                                                                                                                                                                                                                                                                                                                           |
| see above                                                                                                                                                                                                                                                                                                                                                                                                                                                                                                                                                                                                                                                                                                                                                                                                                                                                                                                                                                                                                                                                                                                                                                                                                                                                                                                                                                                                                                                                                                                                                                                                                                                                                                                                                                                                                                                                                                                                                                                                                                                                                                                                                                                                                                                                                                                                                                                                                                                                                                                                                                                                                                                                                                                                 | Department of Pathology, University of Cambridge                                                                                                                                                                    | COVID-19 Genomics UK (COG-UK) Consortium                                  | Aminu S. Jahun, Yasmin Chaudhry, Iliana Georgana, Myra Hosmillo, Rhys Izuagbe, William L. Hamilton, Martin D. Curran, Surendra Parmar, Ian Goodfellow                                                                                                                                                                                                                                                                                                     |
| EPI_ISL_1247997, EPI_ISL_1247998, EPI_ISL_1247999, EPI_ISL_1248001, EPI_ISL_1248002, EPI_ISL_1248003, EPI_ISL_1248004, EPI_ISL_1248005, EPI_ISL_1248006, EPI_ISL_1248007, EPI_ISL_1248008, EPI_ISL_1248009, EPI_ISL_1248010, EPI_ISL_1248011, EPI_ISL_1248012, EPI_ISL_1248013                                                                                                                                                                                                                                                                                                                                                                                                                                                                                                                                                                                                                                                                                                                                                                                                                                                                                                                                                                                                                                                                                                                                                                                                                                                                                                                                                                                                                                                                                                                                                                                                                                                                                                                                                                                                                                                                                                                                                                                                                                                                                                                                                                                                                                                                                                                                                                                                                                                            |                                                                                                                                                                                                                     |                                                                           |                                                                                                                                                                                                                                                                                                                                                                                                                                                           |
| see above                                                                                                                                                                                                                                                                                                                                                                                                                                                                                                                                                                                                                                                                                                                                                                                                                                                                                                                                                                                                                                                                                                                                                                                                                                                                                                                                                                                                                                                                                                                                                                                                                                                                                                                                                                                                                                                                                                                                                                                                                                                                                                                                                                                                                                                                                                                                                                                                                                                                                                                                                                                                                                                                                                                                 | University College London, Great Ormond Street Hospital for Children NHS Foundation Trust, Imperial College Healthcare NHS Trust                                                                                    | COVID-19 Genomics UK (COG-UK) Consortium                                  | Sergi Castellano, Rachel Williams, Mark Kristiansen, Paola Resende Silva, Sunando Roy, Tony Brooks, Helena Tutill, Paola Niola, Patricia Dyal, Charlotte Williams, Leysa Forrest, Yasmin Panchbhaya, Jacqueline Findlay, Samuel Weeks, Julianne Brown, Kathryn Harris, Paul Randell, James Price, Alison Holmes, Judith Breuer                                                                                                                            |
| EPI_ISL_1248377, EPI_ISL_1248379, EPI_ISL_1248387, EPI_ISL_1248398, EPI_ISL_1248399, EPI_ISL_1248410, EPI_ISL_1248421, EPI_ISL_1248431, EPI_ISL_1248435, EPI_ISL_1248443, EPI_ISL_1248448, EPI_ISL_1248455, EPI_ISL_1248491                                                                                                                                                                                                                                                                                                                                                                                                                                                                                                                                                                                                                                                                                                                                                                                                                                                                                                                                                                                                                                                                                                                                                                                                                                                                                                                                                                                                                                                                                                                                                                                                                                                                                                                                                                                                                                                                                                                                                                                                                                                                                                                                                                                                                                                                                                                                                                                                                                                                                                               |                                                                                                                                                                                                                     |                                                                           |                                                                                                                                                                                                                                                                                                                                                                                                                                                           |
| see above                                                                                                                                                                                                                                                                                                                                                                                                                                                                                                                                                                                                                                                                                                                                                                                                                                                                                                                                                                                                                                                                                                                                                                                                                                                                                                                                                                                                                                                                                                                                                                                                                                                                                                                                                                                                                                                                                                                                                                                                                                                                                                                                                                                                                                                                                                                                                                                                                                                                                                                                                                                                                                                                                                                                 | University College London Hospital                                                                                                                                                                                  | COVID-19 Genomics UK (COG-UK) Consortium                                  | Dr Judith Heaney, Matthew Byott, Dr Catherine Houlihan, Dr Daniel Frampton, Stuart Kirk, Dr Moira Spyer, Dr Paul Grant and Dr Eleni Nastouli                                                                                                                                                                                                                                                                                                              |
| EPI_ISL_1249888, EPI_ISL_1249889, EPI_ISL_1249890, EPI_ISL_1249891, EPI_ISL_1249892, EPI_ISL_1249893, EPI_ISL_1249894, EPI_ISL_1249895, EPI_ISL_1249896, EPI_ISL_1249897, EPI_ISL_1249898, EPI_ISL_1249899, EPI_ISL_1249900, EPI_ISL_1249901, EPI_ISL_1249902, EPI_ISL_1249903, EPI_ISL_1249904, EPI_ISL_1249905, EPI_ISL_1249906, EPI_ISL_1249907, EPI_ISL_1249908, EPI_ISL_1249909, EPI_ISL_1249910, EPI_ISL_1249911, EPI_ISL_1249912, EPI_ISL_1249913, EPI_ISL_1249914, EPI_ISL_1249915, EPI_ISL_1249916, EPI_ISL_1249917, EPI_ISL_1249918, EPI_ISL_1249920, EPI_ISL_1249921, EPI_ISL_1249922, EPI_ISL_1249923, EPI_ISL_1249924, EPI_ISL_1249925, EPI_ISL_1249926, EPI_ISL_1249927, EPI_ISL_1249928, EPI_ISL_1249929, EPI_ISL_1249930, EPI_ISL_1249931, EPI_ISL_1249932, EPI_ISL_1249933, EPI_ISL_1249934, EPI_ISL_1249935, EPI_ISL_1249936, EPI_ISL_1249937, EPI_ISL_1249938, EPI_ISL_1249939, EPI_ISL_1249940, EPI_ISL_1249941, EPI_ISL_1249942, EPI_ISL_1249943, EPI_ISL_1249944, EPI_ISL_1249945, EPI_ISL_1249946, EPI_ISL_1249947, EPI_ISL_1249948, EPI_ISL_1249949, EPI_ISL_1249950, EPI_ISL_1249951, EPI_ISL_1249952, EPI_ISL_1249953, EPI_ISL_1249954, EPI_ISL_1249955, EPI_ISL_1249956, EPI_ISL_1249957, EPI_ISL_1249958, EPI_ISL_1249959, EPI_ISL_1249960, EPI_ISL_1249961, EPI_ISL_1249962, EPI_ISL_1249963, EPI_ISL_1249964, EPI_ISL_1249965, EPI_ISL_1249966, EPI_ISL_1250031, EPI_ISL_1250032, EPI_ISL_1250033, EPI_ISL_1250034, EPI_ISL_1250035, EPI_ISL_1250036, EPI_ISL_1250037, EPI_ISL_1250038, EPI_ISL_1250039, EPI_ISL_1250040, EPI_ISL_1250041, EPI_ISL_1250042, EPI_ISL_1250043, EPI_ISL_1250044, EPI_ISL_1250045, EPI_ISL_1250046, EPI_ISL_1250047, EPI_ISL_1250048, EPI_ISL_1250049, EPI_ISL_1250050, EPI_ISL_1250051, EPI_ISL_1250052, EPI_ISL_1250053, EPI_ISL_1250054, EPI_ISL_1250055, EPI_ISL_1250056, EPI_ISL_1250058, EPI_ISL_1250059, EPI_ISL_1250060, EPI_ISL_1250062, EPI_ISL_1250063, EPI_ISL_1250064, EPI_ISL_1250065, EPI_ISL_1250066, EPI_ISL_1250067, EPI_ISL_1250068, EPI_ISL_1250069, EPI_ISL_1250070, EPI_ISL_1250071, EPI_ISL_1250072, EPI_ISL_1250073, EPI_ISL_1250074, EPI_ISL_1250075, EPI_ISL_1250076, EPI_ISL_1250077, EPI_ISL_1250078, EPI_ISL_1250079, EPI_ISL_1250080, EPI_ISL_1250081, EPI_ISL_1250082, EPI_ISL_1250083, EPI_ISL_1250084, EPI_ISL_1250085, EPI_ISL_1250086, EPI_ISL_1250087, EPI_ISL_1250088, EPI_ISL_1250089, EPI_ISL_1250090, EPI_ISL_1250091, EPI_ISL_1250092, EPI_ISL_1250093, EPI_ISL_1250094, EPI_ISL_1250096, EPI_ISL_1250097, EPI_ISL_1250098, EPI_ISL_1250099, EPI_ISL_1250100, EPI_ISL_1250101, EPI_ISL_1250102, EPI_ISL_1250103, EPI_ISL_1250104, EPI_ISL_1250106, EPI_ISL_1250107, EPI_ISL_1250108, EPI_ISL_1250120, EPI_ISL_1250121, EPI_ISL_1250122 |                                                                                                                                                                                                                     |                                                                           |                                                                                                                                                                                                                                                                                                                                                                                                                                                           |
| see above                                                                                                                                                                                                                                                                                                                                                                                                                                                                                                                                                                                                                                                                                                                                                                                                                                                                                                                                                                                                                                                                                                                                                                                                                                                                                                                                                                                                                                                                                                                                                                                                                                                                                                                                                                                                                                                                                                                                                                                                                                                                                                                                                                                                                                                                                                                                                                                                                                                                                                                                                                                                                                                                                                                                 | Centre for Enzyme Innovation, University of Portsmouth / Translational Research Laboratory, Portsmouth Hospitals NHS Trust                                                                                          | COVID-19 Genomics UK (COG-UK) Consortium                                  | Angela Beckett,Salman Goudarzi,Christopher Fearn,Kate Cook,Katie Loveson,Sharon Glaysheer,Scott Elliott,Samuel Robson                                                                                                                                                                                                                                                                                                                                     |
| EPI_ISL_1296494, EPI_ISL_1296500                                                                                                                                                                                                                                                                                                                                                                                                                                                                                                                                                                                                                                                                                                                                                                                                                                                                                                                                                                                                                                                                                                                                                                                                                                                                                                                                                                                                                                                                                                                                                                                                                                                                                                                                                                                                                                                                                                                                                                                                                                                                                                                                                                                                                                                                                                                                                                                                                                                                                                                                                                                                                                                                                                          | Respiratory Virus Unit, National Infection Service, Public Health England                                                                                                                                           | COVID-19 Genomics UK (COG-UK) Consortium                                  | PHE Covid Sequencing Team                                                                                                                                                                                                                                                                                                                                                                                                                                 |
| EPI_ISL_1308448, EPI_ISL_1308449, EPI_ISL_1308450, EPI_ISL_1308452, EPI_ISL_1308453, EPI_ISL_1308454, EPI_ISL_1308455, EPI_ISL_1308456, EPI_ISL_1308457, EPI_ISL_1308458, EPI_ISL_1308459, EPI_ISL_1308460, EPI_ISL_1308461, EPI_ISL_1308462, EPI_ISL_1308463, EPI_ISL_1308464, EPI_ISL_1308465, EPI_ISL_1308466, EPI_ISL_1308467, EPI_ISL_1308468, EPI_ISL_1308469, EPI_ISL_1308470, EPI_ISL_1308480                                                                                                                                                                                                                                                                                                                                                                                                                                                                                                                                                                                                                                                                                                                                                                                                                                                                                                                                                                                                                                                                                                                                                                                                                                                                                                                                                                                                                                                                                                                                                                                                                                                                                                                                                                                                                                                                                                                                                                                                                                                                                                                                                                                                                                                                                                                                     |                                                                                                                                                                                                                     |                                                                           |                                                                                                                                                                                                                                                                                                                                                                                                                                                           |
| see above                                                                                                                                                                                                                                                                                                                                                                                                                                                                                                                                                                                                                                                                                                                                                                                                                                                                                                                                                                                                                                                                                                                                                                                                                                                                                                                                                                                                                                                                                                                                                                                                                                                                                                                                                                                                                                                                                                                                                                                                                                                                                                                                                                                                                                                                                                                                                                                                                                                                                                                                                                                                                                                                                                                                 | University of Birmingham                                                                                                                                                                                            | COVID-19 Genomics UK (COG-UK) Consortium                                  | Institute of Microbiology, University of Birmingham: Claire McMurray, Joanne Stockton, Samuel Nicholls, Radoslaw Poplawski, Will Rowe, Josh Quick,                                                                                                                                                                                                                                                                                                        |

|                                                                                                                                                                                                                                                                                                                                                                                                                                                                                                                                                                                                                                                                                                                                                                                                                                                                                                                                                                                                                                                                                                                                                                                                     |                                                                                                                                                                                                                     |                                          |                                                                                                                                                                                                                                                                                                                                                                                                                                                                                                                                                                                                                                                                                                           |
|-----------------------------------------------------------------------------------------------------------------------------------------------------------------------------------------------------------------------------------------------------------------------------------------------------------------------------------------------------------------------------------------------------------------------------------------------------------------------------------------------------------------------------------------------------------------------------------------------------------------------------------------------------------------------------------------------------------------------------------------------------------------------------------------------------------------------------------------------------------------------------------------------------------------------------------------------------------------------------------------------------------------------------------------------------------------------------------------------------------------------------------------------------------------------------------------------------|---------------------------------------------------------------------------------------------------------------------------------------------------------------------------------------------------------------------|------------------------------------------|-----------------------------------------------------------------------------------------------------------------------------------------------------------------------------------------------------------------------------------------------------------------------------------------------------------------------------------------------------------------------------------------------------------------------------------------------------------------------------------------------------------------------------------------------------------------------------------------------------------------------------------------------------------------------------------------------------------|
| EPI_ISL_1308580, EPI_ISL_1308597, EPI_ISL_1308599                                                                                                                                                                                                                                                                                                                                                                                                                                                                                                                                                                                                                                                                                                                                                                                                                                                                                                                                                                                                                                                                                                                                                   | University of Exeter                                                                                                                                                                                                | COVID-19 Genomics UK (COG-UK) Consortium | Nicholas Loman. University of Birmingham Testing Laboratory: Celina M Whalley, Andrew Bosworth, Charlotte Poxon, Kasun Wanigasooriya, Oliver Pickles, Mike Kidd, Alex Richter, Andrew D Beggs PHE Heartlands Lab: Husam Osman, Andrew Bosworth. Queen Elizabeth Hospital: Anna Casey                                                                                                                                                                                                                                                                                                                                                                                                                      |
| EPI_ISL_1308698                                                                                                                                                                                                                                                                                                                                                                                                                                                                                                                                                                                                                                                                                                                                                                                                                                                                                                                                                                                                                                                                                                                                                                                     | Department of Pathology, University of Cambridge                                                                                                                                                                    | COVID-19 Genomics UK (COG-UK) Consortium | Ben Temperton, Aaron Jeffries, Michelle Michelsen, Joanna Warwick-Dugdale, Audrey Farbos, Robyn Manley, Stephen Michell, Jane Masoli                                                                                                                                                                                                                                                                                                                                                                                                                                                                                                                                                                      |
| EPI_ISL_1308832, EPI_ISL_1308833, EPI_ISL_1308834, EPI_ISL_1308835                                                                                                                                                                                                                                                                                                                                                                                                                                                                                                                                                                                                                                                                                                                                                                                                                                                                                                                                                                                                                                                                                                                                  | Virology Department, Royal Infirmary of Edinburgh, NHS Lothian / School of Biological Sciences, University of Edinburgh                                                                                             | COVID-19 Genomics UK (COG-UK) Consortium | Aminu S. Jahun, Yasmin Chaudhry, Iliana Georgana, Myra Hosmillo, Rhys Izuagbe, William L. Hamilton, Martin D. Curran, Surendra Parmar, Ian Goodfellow                                                                                                                                                                                                                                                                                                                                                                                                                                                                                                                                                     |
| EPI_ISL_1308975, EPI_ISL_1308976, EPI_ISL_1308979, EPI_ISL_1308980, EPI_ISL_1308989, EPI_ISL_1309005, EPI_ISL_1309007, EPI_ISL_1309008, EPI_ISL_1309009, EPI_ISL_1309010, EPI_ISL_1309011, EPI_ISL_1309012, EPI_ISL_1309013, EPI_ISL_1309014, EPI_ISL_1309015, EPI_ISL_1309016, EPI_ISL_1309017, EPI_ISL_1309018, EPI_ISL_1309019, EPI_ISL_1309020, EPI_ISL_1309021, EPI_ISL_1309031, EPI_ISL_1309032, EPI_ISL_1309036, EPI_ISL_1309041, EPI_ISL_1309044, EPI_ISL_1309046, EPI_ISL_1309048, EPI_ISL_1309049, EPI_ISL_1309054, EPI_ISL_1309092, EPI_ISL_1309093, EPI_ISL_1309094, EPI_ISL_1309121, EPI_ISL_1309124                                                                                                                                                                                                                                                                                                                                                                                                                                                                                                                                                                                   |                                                                                                                                                                                                                     |                                          | McHugh M, Dewar R, Cotton S, Rooke S, O'Toole Á, Scher E, Hill V, McCrone JT, Colquhoun R, Yu X, Jackson B, Rambaut A, Templeton K                                                                                                                                                                                                                                                                                                                                                                                                                                                                                                                                                                        |
| see above                                                                                                                                                                                                                                                                                                                                                                                                                                                                                                                                                                                                                                                                                                                                                                                                                                                                                                                                                                                                                                                                                                                                                                                           | University College London, Great Ormond Street Hospital for Children NHS Foundation Trust, Imperial College Healthcare NHS Trust                                                                                    | COVID-19 Genomics UK (COG-UK) Consortium | Sergi Castellano, Rachel Williams, Mark Kristiansen, Paola Resende Silva, Sunando Roy, Tony Brooks, Helena Tutili, Paola Niola, Patricia Dyal, Charlotte Williams, Leysa Forrest, Yasmin Panchbhaya, Jacqueline Findlay, Samuel Weeks, Julianne Brown, Kathryn Harris, Paul Randell, James Price, Alison Holmes, Judith Breuer                                                                                                                                                                                                                                                                                                                                                                            |
| EPI_ISL_1309434, EPI_ISL_1309436, EPI_ISL_1309437, EPI_ISL_1309438, EPI_ISL_1309439, EPI_ISL_1309440, EPI_ISL_1309441, EPI_ISL_1309442, EPI_ISL_1309443, EPI_ISL_1309444, EPI_ISL_1309447, EPI_ISL_1309448, EPI_ISL_1309457, EPI_ISL_1309458, EPI_ISL_1309479, EPI_ISL_1309486, EPI_ISL_1309487, EPI_ISL_1309556, EPI_ISL_1309557, EPI_ISL_1309558, EPI_ISL_1309562, EPI_ISL_1309563, EPI_ISL_1309564, EPI_ISL_1309567, EPI_ISL_1309568, EPI_ISL_1309569, EPI_ISL_1309570, EPI_ISL_1309572, EPI_ISL_1309573, EPI_ISL_1309574, EPI_ISL_1309575, EPI_ISL_1309576, EPI_ISL_1309577, EPI_ISL_1309578, EPI_ISL_1309579, EPI_ISL_1309581, EPI_ISL_1309582, EPI_ISL_1309583, EPI_ISL_1309584, EPI_ISL_1309585, EPI_ISL_1309586, EPI_ISL_1309587, EPI_ISL_1309588, EPI_ISL_1309589, EPI_ISL_1309590, EPI_ISL_1309591, EPI_ISL_1309592, EPI_ISL_1309593, EPI_ISL_1309594, EPI_ISL_1309595, EPI_ISL_1309596, EPI_ISL_1309599, EPI_ISL_1309600, EPI_ISL_1309601, EPI_ISL_1309602, EPI_ISL_1309603, EPI_ISL_1309604, EPI_ISL_1309605, EPI_ISL_1309606, EPI_ISL_1309607, EPI_ISL_1309609, EPI_ISL_1309611, EPI_ISL_1309634                                                                                       |                                                                                                                                                                                                                     |                                          |                                                                                                                                                                                                                                                                                                                                                                                                                                                                                                                                                                                                                                                                                                           |
| see above                                                                                                                                                                                                                                                                                                                                                                                                                                                                                                                                                                                                                                                                                                                                                                                                                                                                                                                                                                                                                                                                                                                                                                                           | Northumbria University / South Tees Hospitals NHS Foundation Trust / North Cumbria Integrated Care NHS Foundation Trust / North Tees and Hartlepool NHS Foundation Trust / Newcastle Hospitals NHS Foundation Trust | COVID-19 Genomics UK (COG-UK) Consortium | Darren L Smith, Andrew Nelson, Matthew Bashton, Greg R Young, Joshua Loh, John Allan, Mohammad A Tariq, Giles S Holt, Gary Black, Wen C Yew, Lynn Dover, Paul Baker, Steve Liggett, Sarah Essex, Jane Greenaway, Debra Padgett, Clive Graham, Garren Scott, Edward Barton, Emma Swindells, Brendan Payne, Jennifer Collins, Yusrì Taha, Gary Eltringham                                                                                                                                                                                                                                                                                                                                                   |
| EPI_ISL_1310289, EPI_ISL_1310290, EPI_ISL_1310327, EPI_ISL_1310362, EPI_ISL_1310363, EPI_ISL_1310364, EPI_ISL_1310365, EPI_ISL_1310403, EPI_ISL_1310404, EPI_ISL_1310405, EPI_ISL_1310406, EPI_ISL_1310407, EPI_ISL_1310408, EPI_ISL_1310409, EPI_ISL_1310410, EPI_ISL_1310411, EPI_ISL_1310412, EPI_ISL_1310413, EPI_ISL_1310414, EPI_ISL_1310415, EPI_ISL_1310416, EPI_ISL_1310417, EPI_ISL_1310418, EPI_ISL_1310419, EPI_ISL_1310420, EPI_ISL_1310421, EPI_ISL_1310422, EPI_ISL_1310423, EPI_ISL_1310424, EPI_ISL_1310425, EPI_ISL_1310426, EPI_ISL_1310427, EPI_ISL_1310428, EPI_ISL_1310429, EPI_ISL_1310430, EPI_ISL_1310431, EPI_ISL_1310432, EPI_ISL_1310433, EPI_ISL_1310434, EPI_ISL_1310435, EPI_ISL_1310436, EPI_ISL_1310437                                                                                                                                                                                                                                                                                                                                                                                                                                                            |                                                                                                                                                                                                                     |                                          |                                                                                                                                                                                                                                                                                                                                                                                                                                                                                                                                                                                                                                                                                                           |
| see above                                                                                                                                                                                                                                                                                                                                                                                                                                                                                                                                                                                                                                                                                                                                                                                                                                                                                                                                                                                                                                                                                                                                                                                           | Centre for Enzyme Innovation, University of Portsmouth / Translational Research Laboratory, Portsmouth Hospitals NHS Trust                                                                                          | COVID-19 Genomics UK (COG-UK) Consortium | Angela Beckett, Salman Goudarzi, Christopher Fearn, Kate Cook, Katie Loveson, Sharon Glaysheer, Scott Elliott, Samuel Robson                                                                                                                                                                                                                                                                                                                                                                                                                                                                                                                                                                              |
| EPI_ISL_1386412, EPI_ISL_1386414, EPI_ISL_1386415, EPI_ISL_1386420, EPI_ISL_1386421, EPI_ISL_1386422, EPI_ISL_1386423, EPI_ISL_1386425, EPI_ISL_1386428, EPI_ISL_1386429, EPI_ISL_1386430, EPI_ISL_1386431, EPI_ISL_1386432, EPI_ISL_1386435, EPI_ISL_1386436, EPI_ISL_1386437, EPI_ISL_1386438, EPI_ISL_1386442, EPI_ISL_1386443, EPI_ISL_1386444, EPI_ISL_1386445, EPI_ISL_1386446, EPI_ISL_1386447, EPI_ISL_1386448, EPI_ISL_1386449, EPI_ISL_1386452, EPI_ISL_1386454, EPI_ISL_1386457, EPI_ISL_1386459, EPI_ISL_1386462, EPI_ISL_1386463, EPI_ISL_1386465, EPI_ISL_1386466, EPI_ISL_1386467, EPI_ISL_1386469, EPI_ISL_1386470, EPI_ISL_1386471, EPI_ISL_1386474, EPI_ISL_1386475                                                                                                                                                                                                                                                                                                                                                                                                                                                                                                               |                                                                                                                                                                                                                     |                                          |                                                                                                                                                                                                                                                                                                                                                                                                                                                                                                                                                                                                                                                                                                           |
| see above                                                                                                                                                                                                                                                                                                                                                                                                                                                                                                                                                                                                                                                                                                                                                                                                                                                                                                                                                                                                                                                                                                                                                                                           | Quadram Institute Bioscience                                                                                                                                                                                        | COVID-19 Genomics UK (COG-UK) Consortium | Dave J. Baker, Gemma L. Kay, Alp Aydin, Thanh Le-Viet, Steven Rudder, Ana P. Tedim, Anastasia Kolyva, Maria Diaz, Leonardo de Oliveira Martins, Nabil-Fareed Alikhan, Lizzie Meadows, Rachael Stanley, Ngozi Elumogo, Muhammed Yasir, Nicholas M. Thomas, Alexander J Trotter, Rachel Gilroy, Samuel Bloomfield, Claire Stuart, Andrew Bell, Reenesh Prakash, Samir Devisevic, Alison E. Mathar, John Wain, Mark Webber, Andrew J. Page, Justin O'Grady                                                                                                                                                                                                                                                   |
| EPI_ISL_1386523, EPI_ISL_1386529, EPI_ISL_1386534, EPI_ISL_1386535, EPI_ISL_1386536, EPI_ISL_1386537, EPI_ISL_1386539                                                                                                                                                                                                                                                                                                                                                                                                                                                                                                                                                                                                                                                                                                                                                                                                                                                                                                                                                                                                                                                                               | University of Birmingham                                                                                                                                                                                            | COVID-19 Genomics UK (COG-UK) Consortium | Institute of Microbiology, University of Birmingham: Claire McMurray, Joanne Stockton, Samuel Nicholls, Radoslaw Poplawski, Will Rowe, Josh Quick, Nicholas Loman. University of Birmingham Testing Laboratory: Celina M Whalley, Andrew Bosworth, Charlotte Poxon, Kasun Wanigasooriya, Oliver Pickles, Mike Kidd, Alex Richter, Andrew D Beggs PHE Heartlands Lab: Husam Osman, Andrew Bosworth. Queen Elizabeth Hospital: Anna Casey                                                                                                                                                                                                                                                                   |
| EPI_ISL_1386576, EPI_ISL_1386582, EPI_ISL_1386584, EPI_ISL_1386585, EPI_ISL_1386587                                                                                                                                                                                                                                                                                                                                                                                                                                                                                                                                                                                                                                                                                                                                                                                                                                                                                                                                                                                                                                                                                                                 | Department of Pathology, University of Cambridge                                                                                                                                                                    | COVID-19 Genomics UK (COG-UK) Consortium | Aminu S. Jahun, Yasmin Chaudhry, Iliana Georgana, Myra Hosmillo, Rhys Izuagbe, William L. Hamilton, Martin D. Curran, Surendra Parmar, Ian Goodfellow                                                                                                                                                                                                                                                                                                                                                                                                                                                                                                                                                     |
| EPI_ISL_1386901, EPI_ISL_1386909                                                                                                                                                                                                                                                                                                                                                                                                                                                                                                                                                                                                                                                                                                                                                                                                                                                                                                                                                                                                                                                                                                                                                                    | University College London, Great Ormond Street Hospital for Children NHS Foundation Trust, Imperial College Healthcare NHS Trust                                                                                    | COVID-19 Genomics UK (COG-UK) Consortium | Sergi Castellano, Rachel Williams, Mark Kristiansen, Paola Resende Silva, Sunando Roy, Tony Brooks, Helena Tutili, Paola Niola, Patricia Dyal, Charlotte Williams, Leysa Forrest, Yasmin Panchbhaya, Jacqueline Findlay, Samuel Weeks, Julianne Brown, Kathryn Harris, Paul Randell, James Price, Alison Holmes, Judith Breuer                                                                                                                                                                                                                                                                                                                                                                            |
| EPI_ISL_1387053, EPI_ISL_1387055, EPI_ISL_1387056, EPI_ISL_1387057, EPI_ISL_1387058, EPI_ISL_1387059, EPI_ISL_1387060, EPI_ISL_1387061, EPI_ISL_1387076, EPI_ISL_1387086, EPI_ISL_1387087, EPI_ISL_1387089, EPI_ISL_1387092, EPI_ISL_1387093, EPI_ISL_1387101, EPI_ISL_1387102, EPI_ISL_1387103, EPI_ISL_1387104, EPI_ISL_1387105, EPI_ISL_1387106, EPI_ISL_1387107, EPI_ISL_1387109, EPI_ISL_1387110, EPI_ISL_1387111, EPI_ISL_1387112                                                                                                                                                                                                                                                                                                                                                                                                                                                                                                                                                                                                                                                                                                                                                             |                                                                                                                                                                                                                     |                                          |                                                                                                                                                                                                                                                                                                                                                                                                                                                                                                                                                                                                                                                                                                           |
| see above                                                                                                                                                                                                                                                                                                                                                                                                                                                                                                                                                                                                                                                                                                                                                                                                                                                                                                                                                                                                                                                                                                                                                                                           | Northumbria University / South Tees Hospitals NHS Foundation Trust / North Cumbria Integrated Care NHS Foundation Trust / North Tees and Hartlepool NHS Foundation Trust / Newcastle Hospitals NHS Foundation Trust | COVID-19 Genomics UK (COG-UK) Consortium | Darren L Smith, Andrew Nelson, Matthew Bashton, Greg R Young, Joshua Loh, John Allan, Mohammad A Tariq, Giles S Holt, Gary Black, Wen C Yew, Lynn Dover, Paul Baker, Steve Liggett, Sarah Essex, Jane Greenaway, Debra Padgett, Clive Graham, Garren Scott, Edward Barton, Emma Swindells, Brendan Payne, Jennifer Collins, Yusrì Taha, Gary Eltringham                                                                                                                                                                                                                                                                                                                                                   |
| EPI_ISL_1388654, EPI_ISL_1388656, EPI_ISL_1388658, EPI_ISL_1388741, EPI_ISL_1388762, EPI_ISL_1388811, EPI_ISL_1388814, EPI_ISL_1388816, EPI_ISL_1388822, EPI_ISL_1388824, EPI_ISL_1388826, EPI_ISL_1388828, EPI_ISL_1388831, EPI_ISL_1388832, EPI_ISL_1388835, EPI_ISL_1388837, EPI_ISL_1388839, EPI_ISL_1388841, EPI_ISL_1388843, EPI_ISL_1388846, EPI_ISL_1388848, EPI_ISL_1388849, EPI_ISL_1388851, EPI_ISL_1388853, EPI_ISL_1388855, EPI_ISL_1388857, EPI_ISL_1388859, EPI_ISL_1388861                                                                                                                                                                                                                                                                                                                                                                                                                                                                                                                                                                                                                                                                                                          |                                                                                                                                                                                                                     |                                          |                                                                                                                                                                                                                                                                                                                                                                                                                                                                                                                                                                                                                                                                                                           |
| see above                                                                                                                                                                                                                                                                                                                                                                                                                                                                                                                                                                                                                                                                                                                                                                                                                                                                                                                                                                                                                                                                                                                                                                                           | Centre for Enzyme Innovation, University of Portsmouth / Translational Research Laboratory, Portsmouth Hospitals NHS Trust                                                                                          | COVID-19 Genomics UK (COG-UK) Consortium | Angela Beckett, Salman Goudarzi, Christopher Fearn, Kate Cook, Katie Loveson, Sharon Glaysheer, Scott Elliott, Samuel Robson                                                                                                                                                                                                                                                                                                                                                                                                                                                                                                                                                                              |
| EPI_ISL_1474397, EPI_ISL_1474441, EPI_ISL_1474443, EPI_ISL_1474445, EPI_ISL_1474455, EPI_ISL_1474463                                                                                                                                                                                                                                                                                                                                                                                                                                                                                                                                                                                                                                                                                                                                                                                                                                                                                                                                                                                                                                                                                                | University of Birmingham                                                                                                                                                                                            | COVID-19 Genomics UK (COG-UK) Consortium | Institute of Microbiology, University of Birmingham: Claire McMurray, Joanne Stockton, Samuel Nicholls, Radoslaw Poplawski, Will Rowe, Josh Quick, Nicholas Loman. University of Birmingham Testing Laboratory: Celina M Whalley, Andrew Bosworth, Charlotte Poxon, Kasun Wanigasooriya, Oliver Pickles, Mike Kidd, Alex Richter, Andrew D Beggs PHE Heartlands Lab: Husam Osman, Andrew Bosworth. Queen Elizabeth Hospital: Anna Casey                                                                                                                                                                                                                                                                   |
| EPI_ISL_1474644                                                                                                                                                                                                                                                                                                                                                                                                                                                                                                                                                                                                                                                                                                                                                                                                                                                                                                                                                                                                                                                                                                                                                                                     | University of Exeter                                                                                                                                                                                                | COVID-19 Genomics UK (COG-UK) Consortium | Ben Temperton, Aaron Jeffries, Michelle Michelsen, Joanna Warwick-Dugdale, Audrey Farbos, Robyn Manley, Stephen Michell, Jane Masoli                                                                                                                                                                                                                                                                                                                                                                                                                                                                                                                                                                      |
| EPI_ISL_1474655                                                                                                                                                                                                                                                                                                                                                                                                                                                                                                                                                                                                                                                                                                                                                                                                                                                                                                                                                                                                                                                                                                                                                                                     | Liverpool Clinical Laboratories                                                                                                                                                                                     | COVID-19 Genomics UK (COG-UK) Consortium | Sam Haldenby, Alistair Darby, Steve Paterson, Anita Lucaci, Julian Hiscoc, M Almsaud, A Alrezaihi, Muhannad Alruwaili, Stuart D Armstrong, Jones Benjamin, Eleanor G Bentley, Anu Chawla, Jordan J Clark, Angela Cowell, Richard Eccles, Isabel Garcia-Dorival, Matthew Gemmell, Alessandro Gerada, PKF Gilmore, Richard Gregory, Ximeng Han, Catherine Hartley, Margaret Hughes, Miren Iturriza-Gomara, James Johnson, L Luu, Jenifer Manson, Charlotte Nelson, Elaine O'Toole, Cassie Olateju, Rebekah Penrice-Randal, Lucille Rainbow, N.P Randle, Trevor Ian Robinson, Parul Sharma, Ghada T Shawli, James P Stewart, Neil Swainston, Ecaterina Vamos, Joanne Watts, Mark Whitehead, Hermione Webster |
| EPI_ISL_1474836, EPI_ISL_1474837, EPI_ISL_1474848, EPI_ISL_1474850, EPI_ISL_1474855                                                                                                                                                                                                                                                                                                                                                                                                                                                                                                                                                                                                                                                                                                                                                                                                                                                                                                                                                                                                                                                                                                                 | University College London, Great Ormond Street Hospital for Children NHS Foundation Trust, Imperial College Healthcare NHS Trust                                                                                    | COVID-19 Genomics UK (COG-UK) Consortium | Sergi Castellano, Rachel Williams, Mark Kristiansen, Paola Resende Silva, Sunando Roy, Tony Brooks, Helena Tutili, Paola Niola, Patricia Dyal, Charlotte Williams, Leysa Forrest, Yasmin Panchbhaya, Jacqueline Findlay, Samuel Weeks, Julianne Brown, Kathryn Harris, Paul Randell, James Price, Alison Holmes, Judith Breuer                                                                                                                                                                                                                                                                                                                                                                            |
| EPI_ISL_1475188                                                                                                                                                                                                                                                                                                                                                                                                                                                                                                                                                                                                                                                                                                                                                                                                                                                                                                                                                                                                                                                                                                                                                                                     | Regional Virus Laboratory, Belfast Health and Social Care Trust                                                                                                                                                     | COVID-19 Genomics UK (COG-UK) Consortium | Conall McCaughey, James McKenna, Tanya Curran, Susan Feeney, Alison Watt, Ciara Cox, Mairead Connor, Zoltan Molnar, David Simpson, Derek Fairley                                                                                                                                                                                                                                                                                                                                                                                                                                                                                                                                                          |
| EPI_ISL_1475190, EPI_ISL_1475194, EPI_ISL_1475195, EPI_ISL_1475197, EPI_ISL_1475198, EPI_ISL_1475199, EPI_ISL_1475200, EPI_ISL_1475201, EPI_ISL_1475202, EPI_ISL_1475203, EPI_ISL_1475205, EPI_ISL_1475223, EPI_ISL_1475224, EPI_ISL_1475225, EPI_ISL_1475226, EPI_ISL_1475227, EPI_ISL_1475228, EPI_ISL_1475229, EPI_ISL_1475230, EPI_ISL_1475231, EPI_ISL_1475232, EPI_ISL_1475233, EPI_ISL_1475234, EPI_ISL_1475235, EPI_ISL_1475236, EPI_ISL_1475237, EPI_ISL_1475238, EPI_ISL_1475240, EPI_ISL_1475241, EPI_ISL_1475242, EPI_ISL_1475243, EPI_ISL_1475244, EPI_ISL_1475245, EPI_ISL_1475246, EPI_ISL_1475247, EPI_ISL_1475248, EPI_ISL_1475249, EPI_ISL_1475250, EPI_ISL_1475251, EPI_ISL_1475252, EPI_ISL_1475253, EPI_ISL_1475254, EPI_ISL_1475255, EPI_ISL_1475256, EPI_ISL_1475257, EPI_ISL_1475258, EPI_ISL_1475259, EPI_ISL_1475260, EPI_ISL_1475261, EPI_ISL_1475262, EPI_ISL_1475263, EPI_ISL_1475264, EPI_ISL_1475265, EPI_ISL_1475266, EPI_ISL_1475267, EPI_ISL_1475268, EPI_ISL_1475269, EPI_ISL_1475270, EPI_ISL_1475271, EPI_ISL_1475272, EPI_ISL_1475273, EPI_ISL_1475274, EPI_ISL_1475275, EPI_ISL_1475276, EPI_ISL_1475277, EPI_ISL_1475278, EPI_ISL_1475279, EPI_ISL_1475280, |                                                                                                                                                                                                                     |                                          |                                                                                                                                                                                                                                                                                                                                                                                                                                                                                                                                                                                                                                                                                                           |

|                                                                                                                                                                                                                                                                                                                                                                                                                                                                                                                                                                                                                                                                                                                                                                                                                                                                                                                                                                                                                                                                                                                                                                                                                                                                                                                                                                                                                                                                                                                                                                                                                                                                                                                                                                                                                                                                                                                                                                                                                                                                                                                                                                                                                                                                                                                                                                                                                                                                                                                                                                                                                                                                                                                                                                                                                                                                                                                                                                                                                                                                                                                                                                                                                                                                                                                                                                                                                                                                                                                                                                                                                                                                                                                                                                                                                                                                                                                                                                                                                                                                                                                                                                                                                                                                                                                                                                                                                                                                                                                                                                                                                                                                                                                                                                                                                                                                                                                                                                                                                                                                                                                                                                                                                                                                                                                                                                                                                                                                                                                                                |                                                                                          |                                                                                                                                                                                                                     |                                                                                                                                                                                                                                                                                                                                                                                                                                                          |                                                                                                                                                                                                                                                                                                                                  |
|------------------------------------------------------------------------------------------------------------------------------------------------------------------------------------------------------------------------------------------------------------------------------------------------------------------------------------------------------------------------------------------------------------------------------------------------------------------------------------------------------------------------------------------------------------------------------------------------------------------------------------------------------------------------------------------------------------------------------------------------------------------------------------------------------------------------------------------------------------------------------------------------------------------------------------------------------------------------------------------------------------------------------------------------------------------------------------------------------------------------------------------------------------------------------------------------------------------------------------------------------------------------------------------------------------------------------------------------------------------------------------------------------------------------------------------------------------------------------------------------------------------------------------------------------------------------------------------------------------------------------------------------------------------------------------------------------------------------------------------------------------------------------------------------------------------------------------------------------------------------------------------------------------------------------------------------------------------------------------------------------------------------------------------------------------------------------------------------------------------------------------------------------------------------------------------------------------------------------------------------------------------------------------------------------------------------------------------------------------------------------------------------------------------------------------------------------------------------------------------------------------------------------------------------------------------------------------------------------------------------------------------------------------------------------------------------------------------------------------------------------------------------------------------------------------------------------------------------------------------------------------------------------------------------------------------------------------------------------------------------------------------------------------------------------------------------------------------------------------------------------------------------------------------------------------------------------------------------------------------------------------------------------------------------------------------------------------------------------------------------------------------------------------------------------------------------------------------------------------------------------------------------------------------------------------------------------------------------------------------------------------------------------------------------------------------------------------------------------------------------------------------------------------------------------------------------------------------------------------------------------------------------------------------------------------------------------------------------------------------------------------------------------------------------------------------------------------------------------------------------------------------------------------------------------------------------------------------------------------------------------------------------------------------------------------------------------------------------------------------------------------------------------------------------------------------------------------------------------------------------------------------------------------------------------------------------------------------------------------------------------------------------------------------------------------------------------------------------------------------------------------------------------------------------------------------------------------------------------------------------------------------------------------------------------------------------------------------------------------------------------------------------------------------------------------------------------------------------------------------------------------------------------------------------------------------------------------------------------------------------------------------------------------------------------------------------------------------------------------------------------------------------------------------------------------------------------------------------------------------------------------------------------------------------|------------------------------------------------------------------------------------------|---------------------------------------------------------------------------------------------------------------------------------------------------------------------------------------------------------------------|----------------------------------------------------------------------------------------------------------------------------------------------------------------------------------------------------------------------------------------------------------------------------------------------------------------------------------------------------------------------------------------------------------------------------------------------------------|----------------------------------------------------------------------------------------------------------------------------------------------------------------------------------------------------------------------------------------------------------------------------------------------------------------------------------|
| EPI_ISL_1475281, EPI_ISL_1475282, EPI_ISL_1475283, EPI_ISL_1475284, EPI_ISL_1475285, EPI_ISL_1475286, EPI_ISL_1475287, EPI_ISL_1475288, EPI_ISL_1475289, EPI_ISL_1475290, EPI_ISL_1475291, EPI_ISL_1475292, EPI_ISL_1475293, EPI_ISL_1475294, EPI_ISL_1475295, EPI_ISL_1475296, EPI_ISL_1475297, EPI_ISL_1475298, EPI_ISL_1475299, EPI_ISL_1475300, EPI_ISL_1475301, EPI_ISL_1475302, EPI_ISL_1475303, EPI_ISL_1475304, EPI_ISL_1475305, EPI_ISL_1475387                                                                                                                                                                                                                                                                                                                                                                                                                                                                                                                                                                                                                                                                                                                                                                                                                                                                                                                                                                                                                                                                                                                                                                                                                                                                                                                                                                                                                                                                                                                                                                                                                                                                                                                                                                                                                                                                                                                                                                                                                                                                                                                                                                                                                                                                                                                                                                                                                                                                                                                                                                                                                                                                                                                                                                                                                                                                                                                                                                                                                                                                                                                                                                                                                                                                                                                                                                                                                                                                                                                                                                                                                                                                                                                                                                                                                                                                                                                                                                                                                                                                                                                                                                                                                                                                                                                                                                                                                                                                                                                                                                                                                                                                                                                                                                                                                                                                                                                                                                                                                                                                                       | see above                                                                                | Northumbria University / South Tees Hospitals NHS Foundation Trust / North Cumbria Integrated Care NHS Foundation Trust / North Tees and Hartlepool NHS Foundation Trust / Newcastle Hospitals NHS Foundation Trust | COVID-19 Genomics UK (COG-UK) Consortium                                                                                                                                                                                                                                                                                                                                                                                                                 | Darren L Smith,Andrew Nelson,Matthew Bashton,Greg R Young,Joshua Loh,John Allan,Mohammad A Tariq,Giles S Holt,Gary Black,Wen C Yew,Lynn Dover,Paul Baker,Steve Liggett,Sarah Essex,Jane Greenaway,Debra Padgett,Clive Graham,Garren Scott,Edward Barton,Emma Swindells,Brendan Payne,Jennifer Collins,Yusri Taha,Gary Eltringham |
| EPI_ISL_1476517, EPI_ISL_1476519                                                                                                                                                                                                                                                                                                                                                                                                                                                                                                                                                                                                                                                                                                                                                                                                                                                                                                                                                                                                                                                                                                                                                                                                                                                                                                                                                                                                                                                                                                                                                                                                                                                                                                                                                                                                                                                                                                                                                                                                                                                                                                                                                                                                                                                                                                                                                                                                                                                                                                                                                                                                                                                                                                                                                                                                                                                                                                                                                                                                                                                                                                                                                                                                                                                                                                                                                                                                                                                                                                                                                                                                                                                                                                                                                                                                                                                                                                                                                                                                                                                                                                                                                                                                                                                                                                                                                                                                                                                                                                                                                                                                                                                                                                                                                                                                                                                                                                                                                                                                                                                                                                                                                                                                                                                                                                                                                                                                                                                                                                               | Originating lab: Wales Specialist Virology Centre Sequencing lab: Pathogen Genomics Unit | Public Health Wales Microbiology Cardiff Wales Specialist Virology Centre                                                                                                                                           | Catherine Moore, Johnathan Evans, Laura Gifford, Malorie Perry, Simon Cottrell, Angela Marchbank, Alec Birchley, Alexander Adams, Amy Gaskin, Bree Gatica-Wilcox, Jason Coombes, Joel Southgate, Lauren Gillett, Lee Graham, Nicole Pacchiarni, Sara Kumziene-Summerhayes, Sarah Taylor, Sophie Jones, Sara Rey, Matthew Bull, Joanne Watkins, Sally Corden, Tom Connor                                                                                  |                                                                                                                                                                                                                                                                                                                                  |
| EPI_ISL_1476566, EPI_ISL_1476567, EPI_ISL_1476568, EPI_ISL_1476569, EPI_ISL_1476570, EPI_ISL_1476571, EPI_ISL_1476572, EPI_ISL_1476573, EPI_ISL_1476574, EPI_ISL_1476575, EPI_ISL_1476576, EPI_ISL_1476577, EPI_ISL_1476578, EPI_ISL_1476579, EPI_ISL_1476580, EPI_ISL_1476581, EPI_ISL_1476582, EPI_ISL_1476583, EPI_ISL_1476584, EPI_ISL_1476585, EPI_ISL_1476586, EPI_ISL_1476587, EPI_ISL_1476588, EPI_ISL_1476589, EPI_ISL_1476590, EPI_ISL_1476591, EPI_ISL_1476592, EPI_ISL_1476593, EPI_ISL_1476594, EPI_ISL_1476595, EPI_ISL_1476596, EPI_ISL_1476597, EPI_ISL_1476598, EPI_ISL_1476599, EPI_ISL_1476600, EPI_ISL_1476601, EPI_ISL_1476602, EPI_ISL_1476603, EPI_ISL_1476604, EPI_ISL_1476605, EPI_ISL_1476606, EPI_ISL_1476607, EPI_ISL_1476608, EPI_ISL_1476609, EPI_ISL_1476610, EPI_ISL_1476611, EPI_ISL_1476612, EPI_ISL_1476613, EPI_ISL_1476614, EPI_ISL_1476615, EPI_ISL_1476616, EPI_ISL_1476617, EPI_ISL_1476618, EPI_ISL_1476619, EPI_ISL_1476620, EPI_ISL_1476621, EPI_ISL_1476622, EPI_ISL_1476623, EPI_ISL_1476624, EPI_ISL_1476625, EPI_ISL_1476630, EPI_ISL_1476631, EPI_ISL_1476632, EPI_ISL_1476633, EPI_ISL_1476634, EPI_ISL_1476635, EPI_ISL_1476636, EPI_ISL_1476637, EPI_ISL_1476638, EPI_ISL_1476639, EPI_ISL_1476640, EPI_ISL_1476641, EPI_ISL_1476642, EPI_ISL_1476643, EPI_ISL_1476644, EPI_ISL_1476645, EPI_ISL_1476646, EPI_ISL_1476647, EPI_ISL_1476648, EPI_ISL_1476649, EPI_ISL_1476651, EPI_ISL_1476652, EPI_ISL_1476653, EPI_ISL_1476654, EPI_ISL_1476655, EPI_ISL_1476656, EPI_ISL_1476657, EPI_ISL_1476658, EPI_ISL_1476659, EPI_ISL_1476660, EPI_ISL_1476661, EPI_ISL_1476662, EPI_ISL_1476663, EPI_ISL_1476664, EPI_ISL_1476665, EPI_ISL_1476666, EPI_ISL_1476667, EPI_ISL_1476668, EPI_ISL_1476669, EPI_ISL_1476670, EPI_ISL_1476671                                                                                                                                                                                                                                                                                                                                                                                                                                                                                                                                                                                                                                                                                                                                                                                                                                                                                                                                                                                                                                                                                                                                                                                                                                                                                                                                                                                                                                                                                                                                                                                                                                                                                                                                                                                                                                                                                                                                                                                                                                                                                                                                                                                                                                                                                                                                                                                                                                                                                                                                                                                                                                                                                                                                                                                                                                                                                                                                                                                                                                                                                                                                                                                                                                                                                                                                                                                                                                                                                                                                                                                                                                                                                                                                                            | see above                                                                                | Centre for Enzyme Innovation, University of Portsmouth / Translational Research Laboratory, Portsmouth Hospitals NHS Trust                                                                                          | COVID-19 Genomics UK (COG-UK) Consortium                                                                                                                                                                                                                                                                                                                                                                                                                 | Angela Beckett,Salman Goudarzi,Christopher Fearn,Kate Cook,Katie Loveson,Sharon Glaysheer,Scott Elliott,Samuel Robson                                                                                                                                                                                                            |
| EPI_ISL_754302                                                                                                                                                                                                                                                                                                                                                                                                                                                                                                                                                                                                                                                                                                                                                                                                                                                                                                                                                                                                                                                                                                                                                                                                                                                                                                                                                                                                                                                                                                                                                                                                                                                                                                                                                                                                                                                                                                                                                                                                                                                                                                                                                                                                                                                                                                                                                                                                                                                                                                                                                                                                                                                                                                                                                                                                                                                                                                                                                                                                                                                                                                                                                                                                                                                                                                                                                                                                                                                                                                                                                                                                                                                                                                                                                                                                                                                                                                                                                                                                                                                                                                                                                                                                                                                                                                                                                                                                                                                                                                                                                                                                                                                                                                                                                                                                                                                                                                                                                                                                                                                                                                                                                                                                                                                                                                                                                                                                                                                                                                                                 | Respiratory Virus Unit, National Infection Service, Public Health England                | COVID-19 Genomics UK (COG-UK) Consortium                                                                                                                                                                            | PHE Covid Sequencing Team                                                                                                                                                                                                                                                                                                                                                                                                                                |                                                                                                                                                                                                                                                                                                                                  |
| EPI_ISL_763769                                                                                                                                                                                                                                                                                                                                                                                                                                                                                                                                                                                                                                                                                                                                                                                                                                                                                                                                                                                                                                                                                                                                                                                                                                                                                                                                                                                                                                                                                                                                                                                                                                                                                                                                                                                                                                                                                                                                                                                                                                                                                                                                                                                                                                                                                                                                                                                                                                                                                                                                                                                                                                                                                                                                                                                                                                                                                                                                                                                                                                                                                                                                                                                                                                                                                                                                                                                                                                                                                                                                                                                                                                                                                                                                                                                                                                                                                                                                                                                                                                                                                                                                                                                                                                                                                                                                                                                                                                                                                                                                                                                                                                                                                                                                                                                                                                                                                                                                                                                                                                                                                                                                                                                                                                                                                                                                                                                                                                                                                                                                 | Quadram Institute Bioscience                                                             | COVID-19 Genomics UK (COG-UK) Consortium                                                                                                                                                                            | Dave J. Baker, Gemma L. Kay, Alp Aydin, Thanh Le-Viet, Steven Rudder, Ana P. Tedim, Anastasia Kolyva, Maria Diaz, Leonardo de Oliveira Martins, Nabil-Fareed Alikhan, Lizzie Meadows, Rachael Stanley, Ngozi Elumogo, Muhammed Yasir, Nicholas M. Thomson, Alexander J Trotter, Rachel Gilroy, Samuel Bloomfield, Claire Stuart, Andrew Bell, Reenesha Prakash, Samir Derवेशic, Alison E. Mather, John Wain, Mark Webber, Andrew J. Page, Justin O'Grady |                                                                                                                                                                                                                                                                                                                                  |
| EPI_ISL_766221, EPI_ISL_770462, EPI_ISL_770463, EPI_ISL_770464, EPI_ISL_770465, EPI_ISL_770466, EPI_ISL_770467, EPI_ISL_770468, EPI_ISL_770469, EPI_ISL_791193, EPI_ISL_791195, EPI_ISL_791196, EPI_ISL_791199, EPI_ISL_791200, EPI_ISL_791201, EPI_ISL_791202, EPI_ISL_791203, EPI_ISL_791209, EPI_ISL_791222, EPI_ISL_791249, EPI_ISL_791250, EPI_ISL_791251, EPI_ISL_791252, EPI_ISL_791253, EPI_ISL_791269, EPI_ISL_791270, EPI_ISL_791271, EPI_ISL_791272, EPI_ISL_791273, EPI_ISL_791274, EPI_ISL_791275, EPI_ISL_791276, EPI_ISL_791277, EPI_ISL_791278                                                                                                                                                                                                                                                                                                                                                                                                                                                                                                                                                                                                                                                                                                                                                                                                                                                                                                                                                                                                                                                                                                                                                                                                                                                                                                                                                                                                                                                                                                                                                                                                                                                                                                                                                                                                                                                                                                                                                                                                                                                                                                                                                                                                                                                                                                                                                                                                                                                                                                                                                                                                                                                                                                                                                                                                                                                                                                                                                                                                                                                                                                                                                                                                                                                                                                                                                                                                                                                                                                                                                                                                                                                                                                                                                                                                                                                                                                                                                                                                                                                                                                                                                                                                                                                                                                                                                                                                                                                                                                                                                                                                                                                                                                                                                                                                                                                                                                                                                                                 | see above                                                                                | Respiratory Virus Unit, National Infection Service, Public Health England                                                                                                                                           | COVID-19 Genomics UK (COG-UK) Consortium                                                                                                                                                                                                                                                                                                                                                                                                                 | PHE Covid Sequencing Team                                                                                                                                                                                                                                                                                                        |
| EPI_ISL_796784, EPI_ISL_796785, EPI_ISL_796786, EPI_ISL_796787, EPI_ISL_796788, EPI_ISL_796789, EPI_ISL_796790, EPI_ISL_796791, EPI_ISL_796792, EPI_ISL_796793, EPI_ISL_796794, EPI_ISL_796796, EPI_ISL_796797, EPI_ISL_796798, EPI_ISL_796799, EPI_ISL_796800, EPI_ISL_796801, EPI_ISL_796802, EPI_ISL_796803, EPI_ISL_796804, EPI_ISL_796805, EPI_ISL_796806, EPI_ISL_796807, EPI_ISL_796808, EPI_ISL_796809, EPI_ISL_796810, EPI_ISL_796811, EPI_ISL_796812, EPI_ISL_796813, EPI_ISL_796814, EPI_ISL_796815, EPI_ISL_796816, EPI_ISL_796817, EPI_ISL_796818, EPI_ISL_796819, EPI_ISL_796820, EPI_ISL_796821, EPI_ISL_796822, EPI_ISL_796823, EPI_ISL_796824, EPI_ISL_796825, EPI_ISL_796826, EPI_ISL_796827, EPI_ISL_796828, EPI_ISL_796829, EPI_ISL_796830, EPI_ISL_796831, EPI_ISL_796832, EPI_ISL_796833, EPI_ISL_796834, EPI_ISL_796835, EPI_ISL_796836, EPI_ISL_796837, EPI_ISL_796838, EPI_ISL_796839, EPI_ISL_796840, EPI_ISL_796841, EPI_ISL_796842, EPI_ISL_796843, EPI_ISL_796844, EPI_ISL_796845, EPI_ISL_796846, EPI_ISL_796847, EPI_ISL_796848, EPI_ISL_796849, EPI_ISL_796850, EPI_ISL_796851, EPI_ISL_796852, EPI_ISL_796853, EPI_ISL_796854, EPI_ISL_796855, EPI_ISL_796856, EPI_ISL_796857, EPI_ISL_796858, EPI_ISL_796859, EPI_ISL_796860, EPI_ISL_796861, EPI_ISL_796862, EPI_ISL_796863, EPI_ISL_796864, EPI_ISL_796865, EPI_ISL_796866, EPI_ISL_796867, EPI_ISL_796868, EPI_ISL_796869, EPI_ISL_796870, EPI_ISL_796871, EPI_ISL_796872, EPI_ISL_796873, EPI_ISL_796874, EPI_ISL_796875, EPI_ISL_796876, EPI_ISL_796877, EPI_ISL_796878, EPI_ISL_796879, EPI_ISL_796880, EPI_ISL_796881, EPI_ISL_796882, EPI_ISL_796883, EPI_ISL_796884, EPI_ISL_796885, EPI_ISL_796886, EPI_ISL_796887, EPI_ISL_796888, EPI_ISL_796889, EPI_ISL_796890, EPI_ISL_796891, EPI_ISL_796892, EPI_ISL_796893, EPI_ISL_796894, EPI_ISL_796895, EPI_ISL_796896, EPI_ISL_796897, EPI_ISL_796898, EPI_ISL_796899, EPI_ISL_796900, EPI_ISL_796901, EPI_ISL_796902, EPI_ISL_796903, EPI_ISL_796904, EPI_ISL_796905, EPI_ISL_796906, EPI_ISL_796907, EPI_ISL_796908, EPI_ISL_796909, EPI_ISL_796910, EPI_ISL_796911, EPI_ISL_796912, EPI_ISL_796913, EPI_ISL_796914, EPI_ISL_796915, EPI_ISL_796916, EPI_ISL_796917, EPI_ISL_796918, EPI_ISL_796919, EPI_ISL_796920, EPI_ISL_796921, EPI_ISL_796922, EPI_ISL_796923, EPI_ISL_796924, EPI_ISL_796925, EPI_ISL_796926, EPI_ISL_796927, EPI_ISL_796928, EPI_ISL_796929, EPI_ISL_796930, EPI_ISL_796931, EPI_ISL_796932, EPI_ISL_796933, EPI_ISL_796934, EPI_ISL_796935, EPI_ISL_796936, EPI_ISL_796937, EPI_ISL_796938, EPI_ISL_796939, EPI_ISL_796940, EPI_ISL_796941, EPI_ISL_796942, EPI_ISL_796943, EPI_ISL_796944, EPI_ISL_796945, EPI_ISL_796946, EPI_ISL_796947, EPI_ISL_796948, EPI_ISL_796949, EPI_ISL_796950, EPI_ISL_796951, EPI_ISL_796952, EPI_ISL_796953, EPI_ISL_796954, EPI_ISL_796955, EPI_ISL_796956, EPI_ISL_796957, EPI_ISL_796958, EPI_ISL_796959, EPI_ISL_796960, EPI_ISL_796961, EPI_ISL_796962, EPI_ISL_796963, EPI_ISL_796964, EPI_ISL_796965, EPI_ISL_796966, EPI_ISL_796967, EPI_ISL_796968, EPI_ISL_796969, EPI_ISL_796970, EPI_ISL_796971, EPI_ISL_796972, EPI_ISL_796973, EPI_ISL_796974, EPI_ISL_796975, EPI_ISL_796976, EPI_ISL_796977, EPI_ISL_796978, EPI_ISL_796979, EPI_ISL_796980, EPI_ISL_796981, EPI_ISL_796982, EPI_ISL_796983, EPI_ISL_796984, EPI_ISL_796985, EPI_ISL_796986, EPI_ISL_796987, EPI_ISL_796988, EPI_ISL_796989, EPI_ISL_796990, EPI_ISL_796991, EPI_ISL_796992, EPI_ISL_796993, EPI_ISL_796994, EPI_ISL_796995, EPI_ISL_796996, EPI_ISL_796997, EPI_ISL_796998, EPI_ISL_796999, EPI_ISL_797000, EPI_ISL_797001, EPI_ISL_797002, EPI_ISL_797003, EPI_ISL_797004, EPI_ISL_797005, EPI_ISL_797006, EPI_ISL_797007, EPI_ISL_797008, EPI_ISL_797009, EPI_ISL_797010, EPI_ISL_797011, EPI_ISL_797012, EPI_ISL_797013, EPI_ISL_797014, EPI_ISL_797015, EPI_ISL_797016, EPI_ISL_797017, EPI_ISL_797018, EPI_ISL_797019, EPI_ISL_797020, EPI_ISL_797021, EPI_ISL_797022, EPI_ISL_797023, EPI_ISL_797024, EPI_ISL_797025, EPI_ISL_797026, EPI_ISL_797027, EPI_ISL_797028, EPI_ISL_797029, EPI_ISL_797030, EPI_ISL_797031, EPI_ISL_797032, EPI_ISL_797033, EPI_ISL_797034, EPI_ISL_797035, EPI_ISL_797036, EPI_ISL_797037, EPI_ISL_797038, EPI_ISL_797039, EPI_ISL_797040, EPI_ISL_797041, EPI_ISL_797042, EPI_ISL_797043, EPI_ISL_797044, EPI_ISL_797045, EPI_ISL_797046, EPI_ISL_797047, EPI_ISL_797048, EPI_ISL_797049, EPI_ISL_797050, EPI_ISL_797051, EPI_ISL_797052, EPI_ISL_797053, EPI_ISL_797054, EPI_ISL_797055, EPI_ISL_797056, EPI_ISL_797057, EPI_ISL_797058, EPI_ISL_797059, EPI_ISL_797060, EPI_ISL_797061, EPI_ISL_797062, EPI_ISL_797063, EPI_ISL_797064, EPI_ISL_797065, EPI_ISL_797066, EPI_ISL_797067, EPI_ISL_797068, EPI_ISL_797069, EPI_ISL_797070, EPI_ISL_797071, EPI_ISL_797072, EPI_ISL_797073, EPI_ISL_797074, EPI_ISL_797075, EPI_ISL_797076, EPI_ISL_797077, EPI_ISL_797078, EPI_ISL_797079, EPI_ISL_797080, EPI_ISL_797081, EPI_ISL_797082, EPI_ISL_797083, EPI_ISL_797084, EPI_ISL_797085, EPI_ISL_797086, EPI_ISL_797087, EPI_ISL_797088, EPI_ISL_797089, EPI_ISL_797090, EPI_ISL_797091, EPI_ISL_797092, EPI_ISL_797093, EPI_ISL_797094, EPI_ISL_797095, EPI_ISL_797096, EPI_ISL_797097, EPI_ISL_797098, EPI_ISL_797099, EPI_ISL_797100, EPI_ISL_797101, EPI_ISL_797102, EPI_ISL_797103, EPI_ISL_797104, EPI_ISL_797105, EPI_ISL_797106, EPI_ISL_797107, EPI_ISL_797108, EPI_ISL_797109, EPI_ISL_797110, EPI_ISL_797111, EPI_ISL_797112, EPI_ISL_797113, EPI_ISL_797114, EPI_ISL_797115, EPI_ISL_797116, EPI_ISL_797117 | see above                                                                                | Lighthouse Lab in Alderley Park                                                                                                                                                                                     | Wellcome Sanger Institute for the COVID-19 Genomics UK (COG-UK) Consortium                                                                                                                                                                                                                                                                                                                                                                               | Jacquelyn Wynn, Mairead Hyland, The Lighthouse Lab in Alderley Park and Alex Alderton, Roberto Amato, Sonia Goncalves, Ewan Harrison, David K. Jackson, Ian Johnston, Dominic Kwiatkowski, Cordelia Langford, John Sillitoe on behalf of the Wellcome Sanger Institute COVID-19 Surveillance Team                                |
| EPI_ISL_797118, EPI_ISL_797120, EPI_ISL_797121, EPI_ISL_797122, EPI_ISL_797123, EPI_ISL_797124, EPI_ISL_797139, EPI_ISL_797140, EPI_ISL_797141, EPI_ISL_797142, EPI_ISL_797143, EPI_ISL_797144, EPI_ISL_797163, EPI_ISL_797164, EPI_ISL_797165, EPI_ISL_797166, EPI_ISL_797167, EPI_ISL_797168, EPI_ISL_797185, EPI_ISL_797187, EPI_ISL_797189, EPI_ISL_797190, EPI_ISL_797191, EPI_ISL_797194, EPI_ISL_797195, EPI_ISL_797215, EPI_ISL_797216, EPI_ISL_797217, EPI_ISL_797218, EPI_ISL_797220, EPI_ISL_797222, EPI_ISL_797243, EPI_ISL_797246, EPI_ISL_797247, EPI_ISL_797248, EPI_ISL_797249, EPI_ISL_797251, EPI_ISL_797266, EPI_ISL_797267, EPI_ISL_797269, EPI_ISL_797272, EPI_ISL_797275, EPI_ISL_797276, EPI_ISL_797294, EPI_ISL_797295, EPI_ISL_797296, EPI_ISL_797297, EPI_ISL_797299, EPI_ISL_797301, EPI_ISL_797323, EPI_ISL_797324, EPI_ISL_797325, EPI_ISL_797326, EPI_ISL_797330, EPI_ISL_797331, EPI_ISL_797357, EPI_ISL_797359, EPI_ISL_797360, EPI_ISL_797362, EPI_ISL_797363, EPI_ISL_797364, EPI_ISL_797381, EPI_ISL_797383, EPI_ISL_797384, EPI_ISL_797385, EPI_ISL_797387, EPI_ISL_797389, EPI_ISL_797390, EPI_ISL_797391, EPI_ISL_797392, EPI_ISL_797394, EPI_ISL_797395, EPI_ISL_797396                                                                                                                                                                                                                                                                                                                                                                                                                                                                                                                                                                                                                                                                                                                                                                                                                                                                                                                                                                                                                                                                                                                                                                                                                                                                                                                                                                                                                                                                                                                                                                                                                                                                                                                                                                                                                                                                                                                                                                                                                                                                                                                                                                                                                                                                                                                                                                                                                                                                                                                                                                                                                                                                                                                                                                                                                                                                                                                                                                                                                                                                                                                                                                                                                                                                                                                                                                                                                                                                                                                                                                                                                                                                                                                                                                                                                                                                                                                                                                                                                                                                                                                                                                                                                                                                                                                                 | see above                                                                                | Lighthouse Lab in Milton Keynes                                                                                                                                                                                     | Wellcome Sanger Institute for the COVID-19 Genomics UK (COG-UK) Consortium                                                                                                                                                                                                                                                                                                                                                                               | The Lighthouse Lab in Milton Keynes and Alex Alderton, Roberto Amato, Sonia Goncalves, Ewan Harrison, David K. Jackson, Ian Johnston, Dominic Kwiatkowski, Cordelia Langford, John Sillitoe on behalf of the Wellcome Sanger Institute COVID-19 Surveillance Team                                                                |
| EPI_ISL_797397, EPI_ISL_797398                                                                                                                                                                                                                                                                                                                                                                                                                                                                                                                                                                                                                                                                                                                                                                                                                                                                                                                                                                                                                                                                                                                                                                                                                                                                                                                                                                                                                                                                                                                                                                                                                                                                                                                                                                                                                                                                                                                                                                                                                                                                                                                                                                                                                                                                                                                                                                                                                                                                                                                                                                                                                                                                                                                                                                                                                                                                                                                                                                                                                                                                                                                                                                                                                                                                                                                                                                                                                                                                                                                                                                                                                                                                                                                                                                                                                                                                                                                                                                                                                                                                                                                                                                                                                                                                                                                                                                                                                                                                                                                                                                                                                                                                                                                                                                                                                                                                                                                                                                                                                                                                                                                                                                                                                                                                                                                                                                                                                                                                                                                 | Lighthouse Lab in Cambridge                                                              | Wellcome Sanger Institute for the COVID-19 Genomics UK (COG-UK) Consortium                                                                                                                                          | Rob Howes, The Lighthouse Lab in Cambridge and Alex Alderton, Roberto Amato, Sonia Goncalves, Ewan Harrison, David K. Jackson, Ian Johnston, Dominic Kwiatkowski, Cordelia Langford, John Sillitoe on behalf of the Wellcome Sanger Institute COVID-19 Surveillance Team                                                                                                                                                                                 |                                                                                                                                                                                                                                                                                                                                  |
| EPI_ISL_797399                                                                                                                                                                                                                                                                                                                                                                                                                                                                                                                                                                                                                                                                                                                                                                                                                                                                                                                                                                                                                                                                                                                                                                                                                                                                                                                                                                                                                                                                                                                                                                                                                                                                                                                                                                                                                                                                                                                                                                                                                                                                                                                                                                                                                                                                                                                                                                                                                                                                                                                                                                                                                                                                                                                                                                                                                                                                                                                                                                                                                                                                                                                                                                                                                                                                                                                                                                                                                                                                                                                                                                                                                                                                                                                                                                                                                                                                                                                                                                                                                                                                                                                                                                                                                                                                                                                                                                                                                                                                                                                                                                                                                                                                                                                                                                                                                                                                                                                                                                                                                                                                                                                                                                                                                                                                                                                                                                                                                                                                                                                                 | Lighthouse Lab in Alderley Park                                                          | Wellcome Sanger Institute for the COVID-19 Genomics UK (COG-UK) Consortium                                                                                                                                          | Jacquelyn Wynn, Mairead Hyland, The Lighthouse Lab in Alderley Park and Alex Alderton, Roberto Amato, Sonia Goncalves, Ewan Harrison, David K. Jackson, Ian Johnston, Dominic Kwiatkowski, Cordelia Langford, John Sillitoe on behalf of the Wellcome Sanger Institute COVID-19 Surveillance Team                                                                                                                                                        |                                                                                                                                                                                                                                                                                                                                  |
| EPI_ISL_797400, EPI_ISL_797401                                                                                                                                                                                                                                                                                                                                                                                                                                                                                                                                                                                                                                                                                                                                                                                                                                                                                                                                                                                                                                                                                                                                                                                                                                                                                                                                                                                                                                                                                                                                                                                                                                                                                                                                                                                                                                                                                                                                                                                                                                                                                                                                                                                                                                                                                                                                                                                                                                                                                                                                                                                                                                                                                                                                                                                                                                                                                                                                                                                                                                                                                                                                                                                                                                                                                                                                                                                                                                                                                                                                                                                                                                                                                                                                                                                                                                                                                                                                                                                                                                                                                                                                                                                                                                                                                                                                                                                                                                                                                                                                                                                                                                                                                                                                                                                                                                                                                                                                                                                                                                                                                                                                                                                                                                                                                                                                                                                                                                                                                                                 | Lighthouse Lab in Cambridge                                                              | Wellcome Sanger Institute for the COVID-19 Genomics UK (COG-UK) Consortium                                                                                                                                          | Rob Howes, The Lighthouse Lab in Cambridge and Alex Alderton, Roberto Amato, Sonia Goncalves, Ewan Harrison, David K. Jackson, Ian Johnston, Dominic Kwiatkowski, Cordelia Langford, John Sillitoe on behalf of the Wellcome Sanger Institute COVID-19 Surveillance Team                                                                                                                                                                                 |                                                                                                                                                                                                                                                                                                                                  |
| EPI_ISL_797402                                                                                                                                                                                                                                                                                                                                                                                                                                                                                                                                                                                                                                                                                                                                                                                                                                                                                                                                                                                                                                                                                                                                                                                                                                                                                                                                                                                                                                                                                                                                                                                                                                                                                                                                                                                                                                                                                                                                                                                                                                                                                                                                                                                                                                                                                                                                                                                                                                                                                                                                                                                                                                                                                                                                                                                                                                                                                                                                                                                                                                                                                                                                                                                                                                                                                                                                                                                                                                                                                                                                                                                                                                                                                                                                                                                                                                                                                                                                                                                                                                                                                                                                                                                                                                                                                                                                                                                                                                                                                                                                                                                                                                                                                                                                                                                                                                                                                                                                                                                                                                                                                                                                                                                                                                                                                                                                                                                                                                                                                                                                 | Lighthouse Lab in Alderley Park                                                          | Wellcome Sanger Institute for the COVID-19 Genomics UK (COG-UK) Consortium                                                                                                                                          | Jacquelyn Wynn, Mairead Hyland, The Lighthouse Lab in Alderley Park and Alex Alderton, Roberto Amato, Sonia Goncalves, Ewan Harrison, David K. Jackson, Ian Johnston, Dominic Kwiatkowski, Cordelia Langford, John Sillitoe on behalf of the Wellcome Sanger Institute COVID-19 Surveillance Team                                                                                                                                                        |                                                                                                                                                                                                                                                                                                                                  |
| EPI_ISL_797403, EPI_ISL_797404, EPI_ISL_797406, EPI_ISL_797407                                                                                                                                                                                                                                                                                                                                                                                                                                                                                                                                                                                                                                                                                                                                                                                                                                                                                                                                                                                                                                                                                                                                                                                                                                                                                                                                                                                                                                                                                                                                                                                                                                                                                                                                                                                                                                                                                                                                                                                                                                                                                                                                                                                                                                                                                                                                                                                                                                                                                                                                                                                                                                                                                                                                                                                                                                                                                                                                                                                                                                                                                                                                                                                                                                                                                                                                                                                                                                                                                                                                                                                                                                                                                                                                                                                                                                                                                                                                                                                                                                                                                                                                                                                                                                                                                                                                                                                                                                                                                                                                                                                                                                                                                                                                                                                                                                                                                                                                                                                                                                                                                                                                                                                                                                                                                                                                                                                                                                                                                 | Lighthouse Lab in Cambridge                                                              | Wellcome Sanger Institute for the COVID-19 Genomics UK (COG-UK) Consortium                                                                                                                                          | Rob Howes, The Lighthouse Lab in Cambridge and Alex Alderton, Roberto Amato, Sonia Goncalves, Ewan Harrison, David K. Jackson, Ian Johnston, Dominic Kwiatkowski, Cordelia Langford, John Sillitoe on behalf of the Wellcome Sanger Institute COVID-19 Surveillance Team                                                                                                                                                                                 |                                                                                                                                                                                                                                                                                                                                  |
| EPI_ISL_797409                                                                                                                                                                                                                                                                                                                                                                                                                                                                                                                                                                                                                                                                                                                                                                                                                                                                                                                                                                                                                                                                                                                                                                                                                                                                                                                                                                                                                                                                                                                                                                                                                                                                                                                                                                                                                                                                                                                                                                                                                                                                                                                                                                                                                                                                                                                                                                                                                                                                                                                                                                                                                                                                                                                                                                                                                                                                                                                                                                                                                                                                                                                                                                                                                                                                                                                                                                                                                                                                                                                                                                                                                                                                                                                                                                                                                                                                                                                                                                                                                                                                                                                                                                                                                                                                                                                                                                                                                                                                                                                                                                                                                                                                                                                                                                                                                                                                                                                                                                                                                                                                                                                                                                                                                                                                                                                                                                                                                                                                                                                                 | Lighthouse Lab in Alderley Park                                                          | Wellcome Sanger Institute for the COVID-19 Genomics UK (COG-UK) Consortium                                                                                                                                          | Jacquelyn Wynn, Mairead Hyland, The Lighthouse Lab in Alderley Park and Alex Alderton, Roberto Amato, Sonia Goncalves, Ewan Harrison, David K. Jackson, Ian Johnston, Dominic Kwiatkowski, Cordelia Langford, John Sillitoe on behalf of the Wellcome Sanger Institute COVID-19 Surveillance Team                                                                                                                                                        |                                                                                                                                                                                                                                                                                                                                  |
| EPI_ISL_797410                                                                                                                                                                                                                                                                                                                                                                                                                                                                                                                                                                                                                                                                                                                                                                                                                                                                                                                                                                                                                                                                                                                                                                                                                                                                                                                                                                                                                                                                                                                                                                                                                                                                                                                                                                                                                                                                                                                                                                                                                                                                                                                                                                                                                                                                                                                                                                                                                                                                                                                                                                                                                                                                                                                                                                                                                                                                                                                                                                                                                                                                                                                                                                                                                                                                                                                                                                                                                                                                                                                                                                                                                                                                                                                                                                                                                                                                                                                                                                                                                                                                                                                                                                                                                                                                                                                                                                                                                                                                                                                                                                                                                                                                                                                                                                                                                                                                                                                                                                                                                                                                                                                                                                                                                                                                                                                                                                                                                                                                                                                                 | Lighthouse Lab in Cambridge                                                              | Wellcome Sanger Institute for the COVID-19 Genomics UK (COG-UK) Consortium                                                                                                                                          | Rob Howes, The Lighthouse Lab in Cambridge and Alex Alderton, Roberto Amato, Sonia Goncalves, Ewan Harrison, David K. Jackson, Ian Johnston, Dominic Kwiatkowski, Cordelia Langford, John Sillitoe on behalf of the Wellcome Sanger Institute COVID-19 Surveillance Team                                                                                                                                                                                 |                                                                                                                                                                                                                                                                                                                                  |
| EPI_ISL_797411                                                                                                                                                                                                                                                                                                                                                                                                                                                                                                                                                                                                                                                                                                                                                                                                                                                                                                                                                                                                                                                                                                                                                                                                                                                                                                                                                                                                                                                                                                                                                                                                                                                                                                                                                                                                                                                                                                                                                                                                                                                                                                                                                                                                                                                                                                                                                                                                                                                                                                                                                                                                                                                                                                                                                                                                                                                                                                                                                                                                                                                                                                                                                                                                                                                                                                                                                                                                                                                                                                                                                                                                                                                                                                                                                                                                                                                                                                                                                                                                                                                                                                                                                                                                                                                                                                                                                                                                                                                                                                                                                                                                                                                                                                                                                                                                                                                                                                                                                                                                                                                                                                                                                                                                                                                                                                                                                                                                                                                                                                                                 | Lighthouse Lab in Alderley Park                                                          | Wellcome Sanger Institute for the COVID-19 Genomics UK                                                                                                                                                              | Jacquelyn Wynn, Mairead Hyland, The Lighthouse Lab in Alderley Park and Alex Alderton, Roberto Amato, Sonia Goncalves, Ewan Harrison, David K.                                                                                                                                                                                                                                                                                                           |                                                                                                                                                                                                                                                                                                                                  |

[illegible]

[illegible]

[illegible]

[illegible]



[illegible]

[illegible]

[illegible]

[illegible]

[illegible]

[illegible]

[illegible]

|                                                                                                                                                                                                                                                                                                                                                                                                                                                                                                                                                                                                                                                                                                                                                                                                                                                                                                                                                                                                                                                                                                                                                                                                                                                                                                                                                                                                                                                                                                                                                                                                                                                                                                                                                                                                                                                                                                                                                                                                                                                                                                                                                                                                                                                                                                                                                                                                                                                                                                                                                                                                                                                                                                                                                                                                                                                                                                                                                                                                                                                                                                                                                                                                                                                                                                                                                                                                                                                                                                                                                                                                                                                                                                                                                                                                                                                                                                                                                                                                                                                                                                                                                                                                                                                                                                                                                                                                                                                                                                                                                                                                                                                                                                                                                                                                                                                                                                                                                                                                                                                                                                                                                                                                                                                                                                                |                                                                                                                                  |                                                                            |                                                                                                                                                                                                                                                                                                                                                                                                                                                                                                                                                                                                                                                                                          |
|----------------------------------------------------------------------------------------------------------------------------------------------------------------------------------------------------------------------------------------------------------------------------------------------------------------------------------------------------------------------------------------------------------------------------------------------------------------------------------------------------------------------------------------------------------------------------------------------------------------------------------------------------------------------------------------------------------------------------------------------------------------------------------------------------------------------------------------------------------------------------------------------------------------------------------------------------------------------------------------------------------------------------------------------------------------------------------------------------------------------------------------------------------------------------------------------------------------------------------------------------------------------------------------------------------------------------------------------------------------------------------------------------------------------------------------------------------------------------------------------------------------------------------------------------------------------------------------------------------------------------------------------------------------------------------------------------------------------------------------------------------------------------------------------------------------------------------------------------------------------------------------------------------------------------------------------------------------------------------------------------------------------------------------------------------------------------------------------------------------------------------------------------------------------------------------------------------------------------------------------------------------------------------------------------------------------------------------------------------------------------------------------------------------------------------------------------------------------------------------------------------------------------------------------------------------------------------------------------------------------------------------------------------------------------------------------------------------------------------------------------------------------------------------------------------------------------------------------------------------------------------------------------------------------------------------------------------------------------------------------------------------------------------------------------------------------------------------------------------------------------------------------------------------------------------------------------------------------------------------------------------------------------------------------------------------------------------------------------------------------------------------------------------------------------------------------------------------------------------------------------------------------------------------------------------------------------------------------------------------------------------------------------------------------------------------------------------------------------------------------------------------------------------------------------------------------------------------------------------------------------------------------------------------------------------------------------------------------------------------------------------------------------------------------------------------------------------------------------------------------------------------------------------------------------------------------------------------------------------------------------------------------------------------------------------------------------------------------------------------------------------------------------------------------------------------------------------------------------------------------------------------------------------------------------------------------------------------------------------------------------------------------------------------------------------------------------------------------------------------------------------------------------------------------------------------------------------------------------------------------------------------------------------------------------------------------------------------------------------------------------------------------------------------------------------------------------------------------------------------------------------------------------------------------------------------------------------------------------------------------------------------------------------------------------------------|----------------------------------------------------------------------------------------------------------------------------------|----------------------------------------------------------------------------|------------------------------------------------------------------------------------------------------------------------------------------------------------------------------------------------------------------------------------------------------------------------------------------------------------------------------------------------------------------------------------------------------------------------------------------------------------------------------------------------------------------------------------------------------------------------------------------------------------------------------------------------------------------------------------------|
| EPI_ISL_811207, EPI_ISL_811211, EPI_ISL_811214, EPI_ISL_811215, EPI_ISL_811217, EPI_ISL_811229, EPI_ISL_811234, EPI_ISL_811236, EPI_ISL_811241, EPI_ISL_811247, EPI_ISL_811248, EPI_ISL_811262, EPI_ISL_811275, EPI_ISL_811280, EPI_ISL_811284, EPI_ISL_811293, EPI_ISL_811309, EPI_ISL_811310, EPI_ISL_811312, EPI_ISL_811321, EPI_ISL_811325, EPI_ISL_811335, EPI_ISL_811344, EPI_ISL_811345, EPI_ISL_811350, EPI_ISL_811353, EPI_ISL_811362, EPI_ISL_811366, EPI_ISL_811377, EPI_ISL_811380, EPI_ISL_811381, EPI_ISL_811382, EPI_ISL_811385, EPI_ISL_811389, EPI_ISL_811392, EPI_ISL_811394, EPI_ISL_811395, EPI_ISL_811400, EPI_ISL_811404, EPI_ISL_811406, EPI_ISL_811410, EPI_ISL_811414, EPI_ISL_811420, EPI_ISL_811422, EPI_ISL_811433, EPI_ISL_811436, EPI_ISL_811454, EPI_ISL_811472, EPI_ISL_811478, EPI_ISL_811482, EPI_ISL_811490, EPI_ISL_811494, EPI_ISL_811500, EPI_ISL_811502, EPI_ISL_811516, EPI_ISL_811519, EPI_ISL_811524, EPI_ISL_811530, EPI_ISL_811538, EPI_ISL_811548, EPI_ISL_811563, EPI_ISL_811565, EPI_ISL_811573, EPI_ISL_811580, EPI_ISL_811584, EPI_ISL_811594                                                                                                                                                                                                                                                                                                                                                                                                                                                                                                                                                                                                                                                                                                                                                                                                                                                                                                                                                                                                                                                                                                                                                                                                                                                                                                                                                                                                                                                                                                                                                                                                                                                                                                                                                                                                                                                                                                                                                                                                                                                                                                                                                                                                                                                                                                                                                                                                                                                                                                                                                                                                                                                                                                                                                                                                                                                                                                                                                                                                                                                                                                                                                                                                                                                                                                                                                                                                                                                                                                                                                                                                                                                                                                                                                                                                                                                                                                                                                                                                                                                                                                                                                                                                                 |                                                                                                                                  |                                                                            |                                                                                                                                                                                                                                                                                                                                                                                                                                                                                                                                                                                                                                                                                          |
| see above                                                                                                                                                                                                                                                                                                                                                                                                                                                                                                                                                                                                                                                                                                                                                                                                                                                                                                                                                                                                                                                                                                                                                                                                                                                                                                                                                                                                                                                                                                                                                                                                                                                                                                                                                                                                                                                                                                                                                                                                                                                                                                                                                                                                                                                                                                                                                                                                                                                                                                                                                                                                                                                                                                                                                                                                                                                                                                                                                                                                                                                                                                                                                                                                                                                                                                                                                                                                                                                                                                                                                                                                                                                                                                                                                                                                                                                                                                                                                                                                                                                                                                                                                                                                                                                                                                                                                                                                                                                                                                                                                                                                                                                                                                                                                                                                                                                                                                                                                                                                                                                                                                                                                                                                                                                                                                      | Lighthouse Lab in Milton Keynes                                                                                                  | Wellcome Sanger Institute for the COVID-19 Genomics UK (COG-UK) Consortium | The Lighthouse Lab in Milton Keynes and Alex Alderton, Roberto Amato, Sonia Goncalves, Ewan Harrison, David K. Jackson, Ian Johnston, Dominic Kwiatkowski, Cordelia Langford, John Sillitoe on behalf of the Wellcome Sanger Institute COVID-19 Surveillance Team                                                                                                                                                                                                                                                                                                                                                                                                                        |
| EPI_ISL_811595                                                                                                                                                                                                                                                                                                                                                                                                                                                                                                                                                                                                                                                                                                                                                                                                                                                                                                                                                                                                                                                                                                                                                                                                                                                                                                                                                                                                                                                                                                                                                                                                                                                                                                                                                                                                                                                                                                                                                                                                                                                                                                                                                                                                                                                                                                                                                                                                                                                                                                                                                                                                                                                                                                                                                                                                                                                                                                                                                                                                                                                                                                                                                                                                                                                                                                                                                                                                                                                                                                                                                                                                                                                                                                                                                                                                                                                                                                                                                                                                                                                                                                                                                                                                                                                                                                                                                                                                                                                                                                                                                                                                                                                                                                                                                                                                                                                                                                                                                                                                                                                                                                                                                                                                                                                                                                 | Lighthouse Lab in Cambridge                                                                                                      | Wellcome Sanger Institute for the COVID-19 Genomics UK (COG-UK) Consortium | Rob Howes, The Lighthouse Lab in Cambridge and Alex Alderton, Roberto Amato, Sonia Goncalves, Ewan Harrison, David K. Jackson, Ian Johnston, Dominic Kwiatkowski, Cordelia Langford, John Sillitoe on behalf of the Wellcome Sanger Institute COVID-19 Surveillance Team                                                                                                                                                                                                                                                                                                                                                                                                                 |
| EPI_ISL_811606, EPI_ISL_811610, EPI_ISL_811617, EPI_ISL_811618, EPI_ISL_811620, EPI_ISL_811621, EPI_ISL_811626, EPI_ISL_811627, EPI_ISL_811634, EPI_ISL_811645, EPI_ISL_811650, EPI_ISL_811651, EPI_ISL_811660, EPI_ISL_811661, EPI_ISL_811664, EPI_ISL_811666, EPI_ISL_811669, EPI_ISL_811670, EPI_ISL_811671, EPI_ISL_811672, EPI_ISL_811677, EPI_ISL_811678                                                                                                                                                                                                                                                                                                                                                                                                                                                                                                                                                                                                                                                                                                                                                                                                                                                                                                                                                                                                                                                                                                                                                                                                                                                                                                                                                                                                                                                                                                                                                                                                                                                                                                                                                                                                                                                                                                                                                                                                                                                                                                                                                                                                                                                                                                                                                                                                                                                                                                                                                                                                                                                                                                                                                                                                                                                                                                                                                                                                                                                                                                                                                                                                                                                                                                                                                                                                                                                                                                                                                                                                                                                                                                                                                                                                                                                                                                                                                                                                                                                                                                                                                                                                                                                                                                                                                                                                                                                                                                                                                                                                                                                                                                                                                                                                                                                                                                                                                 |                                                                                                                                  |                                                                            |                                                                                                                                                                                                                                                                                                                                                                                                                                                                                                                                                                                                                                                                                          |
| see above                                                                                                                                                                                                                                                                                                                                                                                                                                                                                                                                                                                                                                                                                                                                                                                                                                                                                                                                                                                                                                                                                                                                                                                                                                                                                                                                                                                                                                                                                                                                                                                                                                                                                                                                                                                                                                                                                                                                                                                                                                                                                                                                                                                                                                                                                                                                                                                                                                                                                                                                                                                                                                                                                                                                                                                                                                                                                                                                                                                                                                                                                                                                                                                                                                                                                                                                                                                                                                                                                                                                                                                                                                                                                                                                                                                                                                                                                                                                                                                                                                                                                                                                                                                                                                                                                                                                                                                                                                                                                                                                                                                                                                                                                                                                                                                                                                                                                                                                                                                                                                                                                                                                                                                                                                                                                                      | Lighthouse Lab in Milton Keynes                                                                                                  | Wellcome Sanger Institute for the COVID-19 Genomics UK (COG-UK) Consortium | The Lighthouse Lab in Milton Keynes and Alex Alderton, Roberto Amato, Sonia Goncalves, Ewan Harrison, David K. Jackson, Ian Johnston, Dominic Kwiatkowski, Cordelia Langford, John Sillitoe on behalf of the Wellcome Sanger Institute COVID-19 Surveillance Team                                                                                                                                                                                                                                                                                                                                                                                                                        |
| EPI_ISL_811681                                                                                                                                                                                                                                                                                                                                                                                                                                                                                                                                                                                                                                                                                                                                                                                                                                                                                                                                                                                                                                                                                                                                                                                                                                                                                                                                                                                                                                                                                                                                                                                                                                                                                                                                                                                                                                                                                                                                                                                                                                                                                                                                                                                                                                                                                                                                                                                                                                                                                                                                                                                                                                                                                                                                                                                                                                                                                                                                                                                                                                                                                                                                                                                                                                                                                                                                                                                                                                                                                                                                                                                                                                                                                                                                                                                                                                                                                                                                                                                                                                                                                                                                                                                                                                                                                                                                                                                                                                                                                                                                                                                                                                                                                                                                                                                                                                                                                                                                                                                                                                                                                                                                                                                                                                                                                                 | Lighthouse Lab in Cambridge                                                                                                      | Wellcome Sanger Institute for the COVID-19 Genomics UK (COG-UK) Consortium | Rob Howes, The Lighthouse Lab in Cambridge and Alex Alderton, Roberto Amato, Sonia Goncalves, Ewan Harrison, David K. Jackson, Ian Johnston, Dominic Kwiatkowski, Cordelia Langford, John Sillitoe on behalf of the Wellcome Sanger Institute COVID-19 Surveillance Team                                                                                                                                                                                                                                                                                                                                                                                                                 |
| EPI_ISL_811682, EPI_ISL_811688, EPI_ISL_811698, EPI_ISL_811701, EPI_ISL_811702, EPI_ISL_811703, EPI_ISL_811708                                                                                                                                                                                                                                                                                                                                                                                                                                                                                                                                                                                                                                                                                                                                                                                                                                                                                                                                                                                                                                                                                                                                                                                                                                                                                                                                                                                                                                                                                                                                                                                                                                                                                                                                                                                                                                                                                                                                                                                                                                                                                                                                                                                                                                                                                                                                                                                                                                                                                                                                                                                                                                                                                                                                                                                                                                                                                                                                                                                                                                                                                                                                                                                                                                                                                                                                                                                                                                                                                                                                                                                                                                                                                                                                                                                                                                                                                                                                                                                                                                                                                                                                                                                                                                                                                                                                                                                                                                                                                                                                                                                                                                                                                                                                                                                                                                                                                                                                                                                                                                                                                                                                                                                                 | Lighthouse Lab in Milton Keynes                                                                                                  | Wellcome Sanger Institute for the COVID-19 Genomics UK (COG-UK) Consortium | The Lighthouse Lab in Milton Keynes and Alex Alderton, Roberto Amato, Sonia Goncalves, Ewan Harrison, David K. Jackson, Ian Johnston, Dominic Kwiatkowski, Cordelia Langford, John Sillitoe on behalf of the Wellcome Sanger Institute COVID-19 Surveillance Team                                                                                                                                                                                                                                                                                                                                                                                                                        |
| EPI_ISL_811713                                                                                                                                                                                                                                                                                                                                                                                                                                                                                                                                                                                                                                                                                                                                                                                                                                                                                                                                                                                                                                                                                                                                                                                                                                                                                                                                                                                                                                                                                                                                                                                                                                                                                                                                                                                                                                                                                                                                                                                                                                                                                                                                                                                                                                                                                                                                                                                                                                                                                                                                                                                                                                                                                                                                                                                                                                                                                                                                                                                                                                                                                                                                                                                                                                                                                                                                                                                                                                                                                                                                                                                                                                                                                                                                                                                                                                                                                                                                                                                                                                                                                                                                                                                                                                                                                                                                                                                                                                                                                                                                                                                                                                                                                                                                                                                                                                                                                                                                                                                                                                                                                                                                                                                                                                                                                                 | Lighthouse Lab in Cambridge                                                                                                      | Wellcome Sanger Institute for the COVID-19 Genomics UK (COG-UK) Consortium | Rob Howes, The Lighthouse Lab in Cambridge and Alex Alderton, Roberto Amato, Sonia Goncalves, Ewan Harrison, David K. Jackson, Ian Johnston, Dominic Kwiatkowski, Cordelia Langford, John Sillitoe on behalf of the Wellcome Sanger Institute COVID-19 Surveillance Team                                                                                                                                                                                                                                                                                                                                                                                                                 |
| EPI_ISL_811720, EPI_ISL_811726, EPI_ISL_811727, EPI_ISL_811736, EPI_ISL_811740, EPI_ISL_811750, EPI_ISL_811753, EPI_ISL_811756, EPI_ISL_811759, EPI_ISL_811767, EPI_ISL_811776, EPI_ISL_811785, EPI_ISL_811802, EPI_ISL_811808, EPI_ISL_811809, EPI_ISL_811810, EPI_ISL_811811, EPI_ISL_811812, EPI_ISL_811813, EPI_ISL_811814, EPI_ISL_811815, EPI_ISL_811816, EPI_ISL_811817, EPI_ISL_811818, EPI_ISL_811819, EPI_ISL_811820, EPI_ISL_811821, EPI_ISL_811822, EPI_ISL_811823, EPI_ISL_811824, EPI_ISL_811825, EPI_ISL_811826, EPI_ISL_811827, EPI_ISL_811828, EPI_ISL_811829, EPI_ISL_811830, EPI_ISL_811831, EPI_ISL_811832, EPI_ISL_811833, EPI_ISL_811834, EPI_ISL_811835, EPI_ISL_811836, EPI_ISL_811837, EPI_ISL_811838, EPI_ISL_811839, EPI_ISL_811840, EPI_ISL_811841, EPI_ISL_811842, EPI_ISL_811843, EPI_ISL_811844, EPI_ISL_811845, EPI_ISL_811846, EPI_ISL_811847, EPI_ISL_811848, EPI_ISL_811849, EPI_ISL_811850, EPI_ISL_811851, EPI_ISL_811852, EPI_ISL_811853, EPI_ISL_811854, EPI_ISL_811855, EPI_ISL_811856, EPI_ISL_811857, EPI_ISL_811858, EPI_ISL_811859, EPI_ISL_811860, EPI_ISL_811861, EPI_ISL_811862, EPI_ISL_811863, EPI_ISL_811864, EPI_ISL_811865, EPI_ISL_811866, EPI_ISL_811867, EPI_ISL_811868, EPI_ISL_811869, EPI_ISL_811870, EPI_ISL_811871, EPI_ISL_811872, EPI_ISL_811873, EPI_ISL_811874, EPI_ISL_811875, EPI_ISL_811876, EPI_ISL_811877, EPI_ISL_811878, EPI_ISL_811879, EPI_ISL_811880, EPI_ISL_811881, EPI_ISL_811882, EPI_ISL_811883, EPI_ISL_811884, EPI_ISL_811885, EPI_ISL_811886, EPI_ISL_811887, EPI_ISL_811888, EPI_ISL_811889, EPI_ISL_811890, EPI_ISL_811891, EPI_ISL_811892, EPI_ISL_811893, EPI_ISL_811894, EPI_ISL_811895, EPI_ISL_811896, EPI_ISL_811897, EPI_ISL_811898, EPI_ISL_811899, EPI_ISL_811900, EPI_ISL_811901, EPI_ISL_811902, EPI_ISL_811903, EPI_ISL_811904, EPI_ISL_811905, EPI_ISL_811906, EPI_ISL_811907, EPI_ISL_811908, EPI_ISL_811909, EPI_ISL_811910, EPI_ISL_811911, EPI_ISL_811912, EPI_ISL_811913, EPI_ISL_811914, EPI_ISL_811915, EPI_ISL_811916, EPI_ISL_811917, EPI_ISL_811918, EPI_ISL_811919, EPI_ISL_811920, EPI_ISL_811921, EPI_ISL_811922, EPI_ISL_811923, EPI_ISL_811924, EPI_ISL_811925, EPI_ISL_811926, EPI_ISL_811927, EPI_ISL_811928, EPI_ISL_811929, EPI_ISL_811930, EPI_ISL_811931, EPI_ISL_811932, EPI_ISL_811933, EPI_ISL_811934, EPI_ISL_811935, EPI_ISL_811936, EPI_ISL_811937, EPI_ISL_811938, EPI_ISL_811939, EPI_ISL_811940, EPI_ISL_811941, EPI_ISL_811942, EPI_ISL_811943, EPI_ISL_811944, EPI_ISL_811945, EPI_ISL_811946, EPI_ISL_811947, EPI_ISL_811948, EPI_ISL_811949, EPI_ISL_811950, EPI_ISL_811951, EPI_ISL_811952, EPI_ISL_811953, EPI_ISL_811954, EPI_ISL_811955, EPI_ISL_811956, EPI_ISL_811957, EPI_ISL_811958, EPI_ISL_811959, EPI_ISL_811960, EPI_ISL_811961, EPI_ISL_811962, EPI_ISL_811963, EPI_ISL_811964, EPI_ISL_811965, EPI_ISL_811966, EPI_ISL_811967, EPI_ISL_811968, EPI_ISL_811969, EPI_ISL_811970, EPI_ISL_811971, EPI_ISL_811972, EPI_ISL_811973, EPI_ISL_811974, EPI_ISL_811975, EPI_ISL_811976, EPI_ISL_811977, EPI_ISL_811978, EPI_ISL_811979, EPI_ISL_811980, EPI_ISL_811981, EPI_ISL_811982, EPI_ISL_811983, EPI_ISL_811984, EPI_ISL_811985, EPI_ISL_811986, EPI_ISL_811987, EPI_ISL_811988, EPI_ISL_811989, EPI_ISL_811990, EPI_ISL_811991, EPI_ISL_811992, EPI_ISL_811993, EPI_ISL_811994, EPI_ISL_811995, EPI_ISL_811996, EPI_ISL_811997, EPI_ISL_811998, EPI_ISL_811999, EPI_ISL_812000, EPI_ISL_812001, EPI_ISL_812002, EPI_ISL_812003, EPI_ISL_812004, EPI_ISL_812005, EPI_ISL_812006, EPI_ISL_812007, EPI_ISL_812008, EPI_ISL_812009, EPI_ISL_812010, EPI_ISL_812011, EPI_ISL_812012, EPI_ISL_812013, EPI_ISL_812014, EPI_ISL_812015, EPI_ISL_812016, EPI_ISL_812017, EPI_ISL_812018, EPI_ISL_812019, EPI_ISL_812020, EPI_ISL_812021, EPI_ISL_812022, EPI_ISL_812023, EPI_ISL_812024, EPI_ISL_812025, EPI_ISL_812026, EPI_ISL_812027, EPI_ISL_812028, EPI_ISL_812029, EPI_ISL_812030, EPI_ISL_812031, EPI_ISL_812032, EPI_ISL_812033, EPI_ISL_812034, EPI_ISL_812035, EPI_ISL_812036, EPI_ISL_812037, EPI_ISL_812038, EPI_ISL_812039, EPI_ISL_812040, EPI_ISL_812041, EPI_ISL_812042, EPI_ISL_812043, EPI_ISL_812044, EPI_ISL_812045, EPI_ISL_812046, EPI_ISL_812047, EPI_ISL_812048, EPI_ISL_812049, EPI_ISL_812050, EPI_ISL_812051, EPI_ISL_812052, EPI_ISL_812053, EPI_ISL_812054, EPI_ISL_812055, EPI_ISL_812056, EPI_ISL_812057, EPI_ISL_812058, EPI_ISL_812059, EPI_ISL_812060, EPI_ISL_812061, EPI_ISL_812062, EPI_ISL_812063, EPI_ISL_812064, EPI_ISL_812065, EPI_ISL_812066, EPI_ISL_812067, EPI_ISL_812068, EPI_ISL_812069, EPI_ISL_812070, EPI_ISL_812071, EPI_ISL_812072, EPI_ISL_812073, EPI_ISL_812074, EPI_ISL_812075, EPI_ISL_812076, EPI_ISL_812077, EPI_ISL_812078, EPI_ISL_812079, EPI_ISL_812080, EPI_ISL_812081, EPI_ISL_812082, EPI_ISL_812083, EPI_ISL_812084, EPI_ISL_812085, EPI_ISL_812086, EPI_ISL_812087, EPI_ISL_812088, EPI_ISL_812089, EPI_ISL_812090, EPI_ISL_812091, EPI_ISL_812092, EPI_ISL_812093, EPI_ISL_812094, EPI_ISL_812095, EPI_ISL_812096, EPI_ISL_812097, EPI_ISL_812098, EPI_ISL_812099, EPI_ISL_812100, EPI_ISL_812101, EPI_ISL_812102, EPI_ISL_812103, EPI_ISL_812104, EPI_ISL_812105, EPI_ISL_812106, EPI_ISL_812107, EPI_ISL_812108, EPI_ISL_812109, EPI_ISL_812110, EPI_ISL_812111, EPI_ISL_812112, EPI_ISL_812113 |                                                                                                                                  |                                                                            |                                                                                                                                                                                                                                                                                                                                                                                                                                                                                                                                                                                                                                                                                          |
| see above                                                                                                                                                                                                                                                                                                                                                                                                                                                                                                                                                                                                                                                                                                                                                                                                                                                                                                                                                                                                                                                                                                                                                                                                                                                                                                                                                                                                                                                                                                                                                                                                                                                                                                                                                                                                                                                                                                                                                                                                                                                                                                                                                                                                                                                                                                                                                                                                                                                                                                                                                                                                                                                                                                                                                                                                                                                                                                                                                                                                                                                                                                                                                                                                                                                                                                                                                                                                                                                                                                                                                                                                                                                                                                                                                                                                                                                                                                                                                                                                                                                                                                                                                                                                                                                                                                                                                                                                                                                                                                                                                                                                                                                                                                                                                                                                                                                                                                                                                                                                                                                                                                                                                                                                                                                                                                      | Lighthouse Lab in Milton Keynes                                                                                                  | Wellcome Sanger Institute for the COVID-19 Genomics UK (COG-UK) Consortium | The Lighthouse Lab in Milton Keynes and Alex Alderton, Roberto Amato, Sonia Goncalves, Ewan Harrison, David K. Jackson, Ian Johnston, Dominic Kwiatkowski, Cordelia Langford, John Sillitoe on behalf of the Wellcome Sanger Institute COVID-19 Surveillance Team                                                                                                                                                                                                                                                                                                                                                                                                                        |
| EPI_ISL_813091, EPI_ISL_813092, EPI_ISL_813093, EPI_ISL_813116                                                                                                                                                                                                                                                                                                                                                                                                                                                                                                                                                                                                                                                                                                                                                                                                                                                                                                                                                                                                                                                                                                                                                                                                                                                                                                                                                                                                                                                                                                                                                                                                                                                                                                                                                                                                                                                                                                                                                                                                                                                                                                                                                                                                                                                                                                                                                                                                                                                                                                                                                                                                                                                                                                                                                                                                                                                                                                                                                                                                                                                                                                                                                                                                                                                                                                                                                                                                                                                                                                                                                                                                                                                                                                                                                                                                                                                                                                                                                                                                                                                                                                                                                                                                                                                                                                                                                                                                                                                                                                                                                                                                                                                                                                                                                                                                                                                                                                                                                                                                                                                                                                                                                                                                                                                 | University of Birmingham                                                                                                         | COVID-19 Genomics UK (COG-UK) Consortium                                   | Institute of Microbiology, University of Birmingham: Claire McMurrary, Joanne Stockton, Samuel Nicholls, Radoslaw Poplawski, Will Rowe, Josh Quick, Nicholas Loman. University of Birmingham Testing Laboratory: Celina M Whalley, Andrew Bosworth, Charlotte Poxon, Kasun Wanigasooriya, Oliver Pickles, Mike Kidd, Alex Richter, Andrew D Beggs PHE Heartlands Lab: Husam Osman, Andrew Bosworth. Queen Elizabeth Hospital: Anna Casey                                                                                                                                                                                                                                                 |
| EPI_ISL_813171, EPI_ISL_813198, EPI_ISL_813199, EPI_ISL_813201, EPI_ISL_813202, EPI_ISL_813203, EPI_ISL_813204, EPI_ISL_813205, EPI_ISL_813206, EPI_ISL_813207, EPI_ISL_813217, EPI_ISL_813219, EPI_ISL_813220, EPI_ISL_813221, EPI_ISL_813222, EPI_ISL_813223, EPI_ISL_813224, EPI_ISL_813227, EPI_ISL_813256, EPI_ISL_813267, EPI_ISL_813268, EPI_ISL_813269, EPI_ISL_813278, EPI_ISL_813281, EPI_ISL_813283, EPI_ISL_813285, EPI_ISL_813294                                                                                                                                                                                                                                                                                                                                                                                                                                                                                                                                                                                                                                                                                                                                                                                                                                                                                                                                                                                                                                                                                                                                                                                                                                                                                                                                                                                                                                                                                                                                                                                                                                                                                                                                                                                                                                                                                                                                                                                                                                                                                                                                                                                                                                                                                                                                                                                                                                                                                                                                                                                                                                                                                                                                                                                                                                                                                                                                                                                                                                                                                                                                                                                                                                                                                                                                                                                                                                                                                                                                                                                                                                                                                                                                                                                                                                                                                                                                                                                                                                                                                                                                                                                                                                                                                                                                                                                                                                                                                                                                                                                                                                                                                                                                                                                                                                                                 |                                                                                                                                  |                                                                            |                                                                                                                                                                                                                                                                                                                                                                                                                                                                                                                                                                                                                                                                                          |
| see above                                                                                                                                                                                                                                                                                                                                                                                                                                                                                                                                                                                                                                                                                                                                                                                                                                                                                                                                                                                                                                                                                                                                                                                                                                                                                                                                                                                                                                                                                                                                                                                                                                                                                                                                                                                                                                                                                                                                                                                                                                                                                                                                                                                                                                                                                                                                                                                                                                                                                                                                                                                                                                                                                                                                                                                                                                                                                                                                                                                                                                                                                                                                                                                                                                                                                                                                                                                                                                                                                                                                                                                                                                                                                                                                                                                                                                                                                                                                                                                                                                                                                                                                                                                                                                                                                                                                                                                                                                                                                                                                                                                                                                                                                                                                                                                                                                                                                                                                                                                                                                                                                                                                                                                                                                                                                                      | Department of Pathology, University of Cambridge                                                                                 | COVID-19 Genomics UK (COG-UK) Consortium                                   | Aminu S. Jahun, Yasmin Chaudhry, Grant Hall, Iliana Georgana, Myra Hosmillo, Martin D. Curran, Malte Pinckert, Surendra Parmar, Ian Goodfellow                                                                                                                                                                                                                                                                                                                                                                                                                                                                                                                                           |
| EPI_ISL_813581, EPI_ISL_813582, EPI_ISL_813587, EPI_ISL_813588, EPI_ISL_813589, EPI_ISL_813590, EPI_ISL_813591, EPI_ISL_813592, EPI_ISL_813593, EPI_ISL_813594, EPI_ISL_813595, EPI_ISL_813597, EPI_ISL_813600, EPI_ISL_813605, EPI_ISL_813607, EPI_ISL_813608, EPI_ISL_813609, EPI_ISL_813610, EPI_ISL_813611, EPI_ISL_813612, EPI_ISL_813613, EPI_ISL_813614, EPI_ISL_813616, EPI_ISL_813619, EPI_ISL_813623, EPI_ISL_813624, EPI_ISL_813625, EPI_ISL_813626, EPI_ISL_813627, EPI_ISL_813628, EPI_ISL_813629, EPI_ISL_813631, EPI_ISL_813632, EPI_ISL_813633, EPI_ISL_813634, EPI_ISL_813635, EPI_ISL_813636, EPI_ISL_813637, EPI_ISL_813638, EPI_ISL_813639, EPI_ISL_813640, EPI_ISL_813641, EPI_ISL_813642, EPI_ISL_813643, EPI_ISL_813644, EPI_ISL_813645, EPI_ISL_813646, EPI_ISL_813647, EPI_ISL_813648, EPI_ISL_813649, EPI_ISL_813650, EPI_ISL_813651, EPI_ISL_813652, EPI_ISL_813653, EPI_ISL_813654                                                                                                                                                                                                                                                                                                                                                                                                                                                                                                                                                                                                                                                                                                                                                                                                                                                                                                                                                                                                                                                                                                                                                                                                                                                                                                                                                                                                                                                                                                                                                                                                                                                                                                                                                                                                                                                                                                                                                                                                                                                                                                                                                                                                                                                                                                                                                                                                                                                                                                                                                                                                                                                                                                                                                                                                                                                                                                                                                                                                                                                                                                                                                                                                                                                                                                                                                                                                                                                                                                                                                                                                                                                                                                                                                                                                                                                                                                                                                                                                                                                                                                                                                                                                                                                                                                                                                                                                 |                                                                                                                                  |                                                                            |                                                                                                                                                                                                                                                                                                                                                                                                                                                                                                                                                                                                                                                                                          |
| see above                                                                                                                                                                                                                                                                                                                                                                                                                                                                                                                                                                                                                                                                                                                                                                                                                                                                                                                                                                                                                                                                                                                                                                                                                                                                                                                                                                                                                                                                                                                                                                                                                                                                                                                                                                                                                                                                                                                                                                                                                                                                                                                                                                                                                                                                                                                                                                                                                                                                                                                                                                                                                                                                                                                                                                                                                                                                                                                                                                                                                                                                                                                                                                                                                                                                                                                                                                                                                                                                                                                                                                                                                                                                                                                                                                                                                                                                                                                                                                                                                                                                                                                                                                                                                                                                                                                                                                                                                                                                                                                                                                                                                                                                                                                                                                                                                                                                                                                                                                                                                                                                                                                                                                                                                                                                                                      | University of Exeter                                                                                                             | COVID-19 Genomics UK (COG-UK) Consortium                                   | Ben Temperton, Aaron Jeffries, Michelle Michelsen, Joanna Warwick-Dugdale, Audrey Farbos, Robyn Manley, Stephen Michell, Jane Masoli                                                                                                                                                                                                                                                                                                                                                                                                                                                                                                                                                     |
| EPI_ISL_813773, EPI_ISL_813776, EPI_ISL_813778, EPI_ISL_813779, EPI_ISL_813782, EPI_ISL_813810, EPI_ISL_813811, EPI_ISL_813812, EPI_ISL_813813, EPI_ISL_813814, EPI_ISL_813815                                                                                                                                                                                                                                                                                                                                                                                                                                                                                                                                                                                                                                                                                                                                                                                                                                                                                                                                                                                                                                                                                                                                                                                                                                                                                                                                                                                                                                                                                                                                                                                                                                                                                                                                                                                                                                                                                                                                                                                                                                                                                                                                                                                                                                                                                                                                                                                                                                                                                                                                                                                                                                                                                                                                                                                                                                                                                                                                                                                                                                                                                                                                                                                                                                                                                                                                                                                                                                                                                                                                                                                                                                                                                                                                                                                                                                                                                                                                                                                                                                                                                                                                                                                                                                                                                                                                                                                                                                                                                                                                                                                                                                                                                                                                                                                                                                                                                                                                                                                                                                                                                                                                 |                                                                                                                                  |                                                                            |                                                                                                                                                                                                                                                                                                                                                                                                                                                                                                                                                                                                                                                                                          |
| see above                                                                                                                                                                                                                                                                                                                                                                                                                                                                                                                                                                                                                                                                                                                                                                                                                                                                                                                                                                                                                                                                                                                                                                                                                                                                                                                                                                                                                                                                                                                                                                                                                                                                                                                                                                                                                                                                                                                                                                                                                                                                                                                                                                                                                                                                                                                                                                                                                                                                                                                                                                                                                                                                                                                                                                                                                                                                                                                                                                                                                                                                                                                                                                                                                                                                                                                                                                                                                                                                                                                                                                                                                                                                                                                                                                                                                                                                                                                                                                                                                                                                                                                                                                                                                                                                                                                                                                                                                                                                                                                                                                                                                                                                                                                                                                                                                                                                                                                                                                                                                                                                                                                                                                                                                                                                                                      | Liverpool Clinical Laboratories                                                                                                  | COVID-19 Genomics UK (COG-UK) Consortium                                   | Sam Haldenby, Anita Lucaci, Steve Paterson, Julian Hiscox, Alistair Darby, M Almsaud, A Alrezaihi, Muhannad Alruwaili, Stuart D Armstrong, Jones Benjamin, Eleanor G Bentley, Anu Chawla, Jordan J Clark, Angela Cowell, Richard Eccles, Isabel Garcia-Dorival, Matthew Gemmell, Alessandro Gerada, PKF Gilmore, Richard Gregory, Kimeng Han, Catherine Hartley, Margaret Hughes, Miren Iturriza-Gomara, James Johnson, L Luu, Jenifer Manson, Charlotte Nelson, Elaine O'Toole, Cassie Olateju, Rebekah Penrice-Randal , Lucille Rainbow, N.P Randle, Trevor Ian Robinson, Parul Sharma, Ghada T Shawli, James P Stewart, Neil Swainston, Ecaterina Vamos, Joanne Watts, Mark Whitehead |
| EPI_ISL_813900, EPI_ISL_813956, EPI_ISL_813958                                                                                                                                                                                                                                                                                                                                                                                                                                                                                                                                                                                                                                                                                                                                                                                                                                                                                                                                                                                                                                                                                                                                                                                                                                                                                                                                                                                                                                                                                                                                                                                                                                                                                                                                                                                                                                                                                                                                                                                                                                                                                                                                                                                                                                                                                                                                                                                                                                                                                                                                                                                                                                                                                                                                                                                                                                                                                                                                                                                                                                                                                                                                                                                                                                                                                                                                                                                                                                                                                                                                                                                                                                                                                                                                                                                                                                                                                                                                                                                                                                                                                                                                                                                                                                                                                                                                                                                                                                                                                                                                                                                                                                                                                                                                                                                                                                                                                                                                                                                                                                                                                                                                                                                                                                                                 | University College London, Great Ormond Street Hospital for Children NHS Foundation Trust, Imperial College Healthcare NHS Trust | COVID-19 Genomics UK (COG-UK) Consortium                                   | Sergi Castellano, Rachel Williams, Mark Kristiansen, Paola Resende Silva, Sunando Roy, Tony Brooks, Helena Tutill, Paola Niola, Patricia Dyal, Charlotte Williams, Leyssa Forrest, Yasmin Panchbhaya, Jacqueline Findlay, Samuel Weeks, Julianne Brown, Kathryn Harris, Paul Randell, James Price, Alison Holmes, Judith Breuer                                                                                                                                                                                                                                                                                                                                                          |
| EPI_ISL_814350                                                                                                                                                                                                                                                                                                                                                                                                                                                                                                                                                                                                                                                                                                                                                                                                                                                                                                                                                                                                                                                                                                                                                                                                                                                                                                                                                                                                                                                                                                                                                                                                                                                                                                                                                                                                                                                                                                                                                                                                                                                                                                                                                                                                                                                                                                                                                                                                                                                                                                                                                                                                                                                                                                                                                                                                                                                                                                                                                                                                                                                                                                                                                                                                                                                                                                                                                                                                                                                                                                                                                                                                                                                                                                                                                                                                                                                                                                                                                                                                                                                                                                                                                                                                                                                                                                                                                                                                                                                                                                                                                                                                                                                                                                                                                                                                                                                                                                                                                                                                                                                                                                                                                                                                                                                                                                 | Wales Specialist Virology Centre Sequencing lab: Pathogen Genomics Unit                                                          | COVID-19 Genomics UK (COG-UK) Consortium                                   | Catherine Moore, Johnathan Evans, Laura Gifford, Malorie Perry, Simon Cottrell, Angela Marchbank, Alec Birchley, Alexander Adams, Amy Gaskin, Bree Gatica-Wilcox, Jason Coombes, Joel Southgate, Lauren Gilbert, Lee Graham, Nicole Pacchiariini, Sara Kumziene-Summerhayes, Sarah Taylor, Sophie Jones, Sara Rey, Matthew Bull, Joanne Watkins, Sally Corden, Tom Connor                                                                                                                                                                                                                                                                                                                |
| EPI_ISL_814358, EPI_ISL_814429, EPI_ISL_814433, EPI_ISL_814434                                                                                                                                                                                                                                                                                                                                                                                                                                                                                                                                                                                                                                                                                                                                                                                                                                                                                                                                                                                                                                                                                                                                                                                                                                                                                                                                                                                                                                                                                                                                                                                                                                                                                                                                                                                                                                                                                                                                                                                                                                                                                                                                                                                                                                                                                                                                                                                                                                                                                                                                                                                                                                                                                                                                                                                                                                                                                                                                                                                                                                                                                                                                                                                                                                                                                                                                                                                                                                                                                                                                                                                                                                                                                                                                                                                                                                                                                                                                                                                                                                                                                                                                                                                                                                                                                                                                                                                                                                                                                                                                                                                                                                                                                                                                                                                                                                                                                                                                                                                                                                                                                                                                                                                                                                                 | Bioinformatics and Biostatistics Lab, Advanced Sequencing Facility                                                               | COVID-19 Genomics UK (COG-UK) Consortium                                   | Aengus Stewart, Jerome Nicod, Chelsea Sawyer, Laura Cubitt, Harshil Patel, Margaret Crawford                                                                                                                                                                                                                                                                                                                                                                                                                                                                                                                                                                                             |
| EPI_ISL_814510, EPI_ISL_815071, EPI_ISL_815240, EPI_ISL_815241, EPI_ISL_815242, EPI_ISL_815243                                                                                                                                                                                                                                                                                                                                                                                                                                                                                                                                                                                                                                                                                                                                                                                                                                                                                                                                                                                                                                                                                                                                                                                                                                                                                                                                                                                                                                                                                                                                                                                                                                                                                                                                                                                                                                                                                                                                                                                                                                                                                                                                                                                                                                                                                                                                                                                                                                                                                                                                                                                                                                                                                                                                                                                                                                                                                                                                                                                                                                                                                                                                                                                                                                                                                                                                                                                                                                                                                                                                                                                                                                                                                                                                                                                                                                                                                                                                                                                                                                                                                                                                                                                                                                                                                                                                                                                                                                                                                                                                                                                                                                                                                                                                                                                                                                                                                                                                                                                                                                                                                                                                                                                                                 | Wales Specialist Virology Centre Sequencing lab: Pathogen Genomics Unit                                                          | COVID-19 Genomics UK (COG-UK) Consortium                                   | Catherine Moore, Johnathan Evans, Laura Gifford, Malorie Perry, Simon Cottrell, Angela Marchbank, Alec Birchley, Alexander Adams, Amy Gaskin, Bree Gatica-Wilcox, Jason Coombes, Joel Southgate, Lauren Gilbert, Lee Graham, Nicole Pacchiariini, Sara Kumziene-Summerhayes, Sarah Taylor, Sophie Jones, Sara Rey, Matthew Bull, Joanne Watkins, Sally Corden, Tom Connor                                                                                                                                                                                                                                                                                                                |
| EPI_ISL_816194, EPI_ISL_816195, EPI_ISL_816203, EPI_ISL_816212, EPI_ISL_816213, EPI_ISL_816214, EPI_ISL_816215, EPI_ISL_816217, EPI_ISL_816218, EPI_ISL_816220, EPI_ISL_816221, EPI_ISL_816222, EPI_ISL_816223, EPI_ISL_816224                                                                                                                                                                                                                                                                                                                                                                                                                                                                                                                                                                                                                                                                                                                                                                                                                                                                                                                                                                                                                                                                                                                                                                                                                                                                                                                                                                                                                                                                                                                                                                                                                                                                                                                                                                                                                                                                                                                                                                                                                                                                                                                                                                                                                                                                                                                                                                                                                                                                                                                                                                                                                                                                                                                                                                                                                                                                                                                                                                                                                                                                                                                                                                                                                                                                                                                                                                                                                                                                                                                                                                                                                                                                                                                                                                                                                                                                                                                                                                                                                                                                                                                                                                                                                                                                                                                                                                                                                                                                                                                                                                                                                                                                                                                                                                                                                                                                                                                                                                                                                                                                                 |                                                                                                                                  |                                                                            |                                                                                                                                                                                                                                                                                                                                                                                                                                                                                                                                                                                                                                                                                          |
| see above                                                                                                                                                                                                                                                                                                                                                                                                                                                                                                                                                                                                                                                                                                                                                                                                                                                                                                                                                                                                                                                                                                                                                                                                                                                                                                                                                                                                                                                                                                                                                                                                                                                                                                                                                                                                                                                                                                                                                                                                                                                                                                                                                                                                                                                                                                                                                                                                                                                                                                                                                                                                                                                                                                                                                                                                                                                                                                                                                                                                                                                                                                                                                                                                                                                                                                                                                                                                                                                                                                                                                                                                                                                                                                                                                                                                                                                                                                                                                                                                                                                                                                                                                                                                                                                                                                                                                                                                                                                                                                                                                                                                                                                                                                                                                                                                                                                                                                                                                                                                                                                                                                                                                                                                                                                                                                      | Centre for Enzyme Innovation, University of Portsmouth / Translational Research Laboratory, Portsmouth Hospitals NHS Trust       | COVID-19 Genomics UK (COG-UK) Consortium                                   | Angela Beckett, Yann Bourgeois, Garry Scarlett, Sharon Glayshear, Scott Elliott, Kelly Bicknell, Robert Impey, Allyson Lloyd, Sarah Wylie, Ethan Butcher, Anoop Chauhan, Samuel Robson                                                                                                                                                                                                                                                                                                                                                                                                                                                                                                   |
| EPI_ISL_816226, EPI_ISL_816227, EPI_ISL_816228, EPI_ISL_816229, EPI_ISL_816232, EPI_ISL_816233, EPI_ISL_816235, EPI_ISL_816239, EPI_ISL_816243, EPI_ISL_816246, EPI_ISL_816248, EPI_ISL_816255, EPI_ISL_816256, EPI_ISL_816261, EPI_ISL_816275, EPI_ISL_816276, EPI_ISL_816277, EPI_ISL_816285, EPI_ISL_816290, EPI_ISL_816291, EPI_ISL_816293, EPI_ISL_816294, EPI_ISL_816296, EPI_ISL_816297, EPI_ISL_816305, EPI_ISL_816311, EPI_ISL_816314, EPI_ISL_816316, EPI_ISL_816318, EPI_ISL_816319, EPI_ISL_816320, EPI_ISL_816323, EPI_ISL_816326, EPI_ISL_816327, EPI_ISL_816329, EPI_ISL_816331, EPI_ISL_816332, EPI_ISL_816333, EPI_ISL_816334, EPI_ISL_816350, EPI_ISL_816353, EPI_ISL_816355, EPI_ISL_816357, EPI_ISL_816364, EPI_ISL_816365, EPI_ISL_816368, EPI_ISL_816382, EPI_ISL_816383, EPI_ISL_816390, EPI_ISL_816392, EPI_ISL_816396, EPI_ISL_816407, EPI_ISL_816408, EPI_ISL_816409, EPI_ISL_816415, EPI_ISL_816421, EPI_ISL_816423, EPI_ISL_816425, EPI_ISL_816426, EPI_ISL_816427, EPI_ISL_816430, EPI_ISL_816431, EPI_ISL_816434, EPI_ISL_816436, EPI_ISL_816437, EPI_ISL_816438, EPI_ISL_816441, EPI_ISL_816442, EPI_ISL_816444, EPI_ISL_816448, EPI_ISL_816449, EPI_ISL_816458, EPI_ISL_816462, EPI_ISL_816469,                                                                                                                                                                                                                                                                                                                                                                                                                                                                                                                                                                                                                                                                                                                                                                                                                                                                                                                                                                                                                                                                                                                                                                                                                                                                                                                                                                                                                                                                                                                                                                                                                                                                                                                                                                                                                                                                                                                                                                                                                                                                                                                                                                                                                                                                                                                                                                                                                                                                                                                                                                                                                                                                                                                                                                                                                                                                                                                                                                                                                                                                                                                                                                                                                                                                                                                                                                                                                                                                                                                                                                                                                                                                                                                                                                                                                                                                                                                                                                                                                                                                                |                                                                                                                                  |                                                                            |                                                                                                                                                                                                                                                                                                                                                                                                                                                                                                                                                                                                                                                                                          |



|                                                                                                                                                                                                                                                                                                                                                                                                                                                                                                                                                                                                                                                                                                                                                |           |                                                                                                                                                                                  |                                          |                                                                                                                                                                                                                                                                                                                                                                                                                                                           |
|------------------------------------------------------------------------------------------------------------------------------------------------------------------------------------------------------------------------------------------------------------------------------------------------------------------------------------------------------------------------------------------------------------------------------------------------------------------------------------------------------------------------------------------------------------------------------------------------------------------------------------------------------------------------------------------------------------------------------------------------|-----------|----------------------------------------------------------------------------------------------------------------------------------------------------------------------------------|------------------------------------------|-----------------------------------------------------------------------------------------------------------------------------------------------------------------------------------------------------------------------------------------------------------------------------------------------------------------------------------------------------------------------------------------------------------------------------------------------------------|
| EPI_ISL_816472, EPI_ISL_816475, EPI_ISL_816477, EPI_ISL_816492, EPI_ISL_816494, EPI_ISL_816495, EPI_ISL_816496, EPI_ISL_816501, EPI_ISL_816505, EPI_ISL_816508, EPI_ISL_816517, EPI_ISL_816525, EPI_ISL_816536, EPI_ISL_816537, EPI_ISL_816539, EPI_ISL_816546, EPI_ISL_816555, EPI_ISL_816560, EPI_ISL_816561, EPI_ISL_816566, EPI_ISL_816571, EPI_ISL_816576, EPI_ISL_816581, EPI_ISL_816582, EPI_ISL_816584, EPI_ISL_816585, EPI_ISL_816600, EPI_ISL_816601, EPI_ISL_816605, EPI_ISL_816606, EPI_ISL_816607, EPI_ISL_816608, EPI_ISL_816611, EPI_ISL_816613, EPI_ISL_816616, EPI_ISL_816620, EPI_ISL_816621, EPI_ISL_816629, EPI_ISL_816632, EPI_ISL_816633, EPI_ISL_816634, EPI_ISL_816635, EPI_ISL_816641, EPI_ISL_816642, EPI_ISL_816646 | see above | Virology Department, Sheffield Teaching Hospitals NHS Foundation Trust/Department of Infection, Immunity and Cardiovascular Disease, The Medical School, University of Sheffield | COVID-19 Genomics UK (COG-UK) Consortium | Thushan de Silva, Matthew Parker, Nikki Smith, Adri Agyal, Rebecca Brown, Luke Green, Rachel Tucker, Paul Parsons, Danielle Groves, Katie Johnson, Laura Carrilero, Alex Keeley, Dave Partridge, Matthew Wyles, Benjamin Lindsey, Mehmet Yavuz, Mohammad Raza, Carlad Evans                                                                                                                                                                               |
| EPI_ISL_816825, EPI_ISL_816826, EPI_ISL_816827, EPI_ISL_816828, EPI_ISL_816829, EPI_ISL_816830, EPI_ISL_816831, EPI_ISL_816832, EPI_ISL_816833, EPI_ISL_816834, EPI_ISL_816835, EPI_ISL_816836, EPI_ISL_816837, EPI_ISL_816838, EPI_ISL_816839, EPI_ISL_816840, EPI_ISL_816841, EPI_ISL_816842, EPI_ISL_816843, EPI_ISL_816844, EPI_ISL_816845, EPI_ISL_816846, EPI_ISL_816847, EPI_ISL_816848, EPI_ISL_816849, EPI_ISL_816850, EPI_ISL_816851, EPI_ISL_816852, EPI_ISL_816853, EPI_ISL_816854, EPI_ISL_816855, EPI_ISL_816856, EPI_ISL_816857, EPI_ISL_816858, EPI_ISL_816859, EPI_ISL_816860, EPI_ISL_816892, EPI_ISL_816897, EPI_ISL_816898, EPI_ISL_816903, EPI_ISL_816959, EPI_ISL_816964, EPI_ISL_816965, EPI_ISL_816970, EPI_ISL_817039 | see above | Bioinformatics and Biostatistics Lab, Advanced Sequencing Facility                                                                                                               | COVID-19 Genomics UK (COG-UK) Consortium | Aengus Stewart,Jerome Nicod,Chelsea Sawyer,Laura Cubitt,Harshil Patel,Margaret Crawford                                                                                                                                                                                                                                                                                                                                                                   |
| EPI_ISL_819370, EPI_ISL_819378, EPI_ISL_819387, EPI_ISL_819388, EPI_ISL_819389, EPI_ISL_819390, EPI_ISL_819398, EPI_ISL_819399, EPI_ISL_819400, EPI_ISL_819401, EPI_ISL_819402, EPI_ISL_819403, EPI_ISL_819404, EPI_ISL_819428, EPI_ISL_819431, EPI_ISL_819433, EPI_ISL_819437, EPI_ISL_819438, EPI_ISL_819439                                                                                                                                                                                                                                                                                                                                                                                                                                 | see above | Quadram Institute Bioscience                                                                                                                                                     | COVID-19 Genomics UK (COG-UK) Consortium | Dave J. Baker, Gemma L. Kay, Alp Aydin, Thanh Le-Viet, Steven Rudder, Ana P. Tedim, Anastasia Kolyva, Maria Diaz, Leonardo de Oliveira Martins, Nabil-Fareed Alikhan, Lizzie Meadows, Rachael Stanley, Ngozi Elumogo, Muhammed Yasir, Nicholas M. Thomson, Alexander J Trotter, Rachel Gilroy, Samuel Bloomfield, Claire Stuart, Andrew Bell, Reenesh Prakash, Samir Dervisevic, Alison E. Mather, John Wain, Mark Webber, Andrew J. Page, Justin O'Grady |
| EPI_ISL_820246, EPI_ISL_820249, EPI_ISL_820251                                                                                                                                                                                                                                                                                                                                                                                                                                                                                                                                                                                                                                                                                                 |           | University College London, Great Ormond Street Hospital for Children NHS Foundation Trust, Imperial College Healthcare NHS Trust                                                 | COVID-19 Genomics UK (COG-UK) Consortium | Sergi Castellano, Rachel Williams, Mark Kristiansen, Paola Resende Silva, Sunando Roy, Tony Brooks, Helena Tutili, Paola Niola, Patricia Dyal, Charlotte Williams, Leysa Forrest, Yasmin Panchbhaya, Jacqueline Findlay, Samuel Weeks, Julianne Brown, Kathryn Harris, Paul Randell, James Price, Alison Holmes, Judith Breuer                                                                                                                            |
| EPI_ISL_820253                                                                                                                                                                                                                                                                                                                                                                                                                                                                                                                                                                                                                                                                                                                                 |           | Quadram Institute Bioscience                                                                                                                                                     | COVID-19 Genomics UK (COG-UK) Consortium | Dave J. Baker, Gemma L. Kay, Alp Aydin, Thanh Le-Viet, Steven Rudder, Ana P. Tedim, Anastasia Kolyva, Maria Diaz, Leonardo de Oliveira Martins, Nabil-Fareed Alikhan, Lizzie Meadows, Rachael Stanley, Ngozi Elumogo, Muhammed Yasir, Nicholas M. Thomson, Alexander J Trotter, Rachel Gilroy, Samuel Bloomfield, Claire Stuart, Andrew Bell, Reenesh Prakash, Samir Dervisevic, Alison E. Mather, John Wain, Mark Webber, Andrew J. Page, Justin O'Grady |
| EPI_ISL_820256, EPI_ISL_820259                                                                                                                                                                                                                                                                                                                                                                                                                                                                                                                                                                                                                                                                                                                 |           | University College London, Great Ormond Street Hospital for Children NHS Foundation Trust, Imperial College Healthcare NHS Trust                                                 | COVID-19 Genomics UK (COG-UK) Consortium | Sergi Castellano, Rachel Williams, Mark Kristiansen, Paola Resende Silva, Sunando Roy, Tony Brooks, Helena Tutili, Paola Niola, Patricia Dyal, Charlotte Williams, Leysa Forrest, Yasmin Panchbhaya, Jacqueline Findlay, Samuel Weeks, Julianne Brown, Kathryn Harris, Paul Randell, James Price, Alison Holmes, Judith Breuer                                                                                                                            |
| EPI_ISL_820261                                                                                                                                                                                                                                                                                                                                                                                                                                                                                                                                                                                                                                                                                                                                 |           | Quadram Institute Bioscience                                                                                                                                                     | COVID-19 Genomics UK (COG-UK) Consortium | Dave J. Baker, Gemma L. Kay, Alp Aydin, Thanh Le-Viet, Steven Rudder, Ana P. Tedim, Anastasia Kolyva, Maria Diaz, Leonardo de Oliveira Martins, Nabil-Fareed Alikhan, Lizzie Meadows, Rachael Stanley, Ngozi Elumogo, Muhammed Yasir, Nicholas M. Thomson, Alexander J Trotter, Rachel Gilroy, Samuel Bloomfield, Claire Stuart, Andrew Bell, Reenesh Prakash, Samir Dervisevic, Alison E. Mather, John Wain, Mark Webber, Andrew J. Page, Justin O'Grady |
| EPI_ISL_820264, EPI_ISL_820266, EPI_ISL_820268, EPI_ISL_820271, EPI_ISL_820273, EPI_ISL_820276                                                                                                                                                                                                                                                                                                                                                                                                                                                                                                                                                                                                                                                 |           | University College London, Great Ormond Street Hospital for Children NHS Foundation Trust, Imperial College Healthcare NHS Trust                                                 | COVID-19 Genomics UK (COG-UK) Consortium | Sergi Castellano, Rachel Williams, Mark Kristiansen, Paola Resende Silva, Sunando Roy, Tony Brooks, Helena Tutili, Paola Niola, Patricia Dyal, Charlotte Williams, Leysa Forrest, Yasmin Panchbhaya, Jacqueline Findlay, Samuel Weeks, Julianne Brown, Kathryn Harris, Paul Randell, James Price, Alison Holmes, Judith Breuer                                                                                                                            |
| EPI_ISL_820279                                                                                                                                                                                                                                                                                                                                                                                                                                                                                                                                                                                                                                                                                                                                 |           | Quadram Institute Bioscience                                                                                                                                                     | COVID-19 Genomics UK (COG-UK) Consortium | Dave J. Baker, Gemma L. Kay, Alp Aydin, Thanh Le-Viet, Steven Rudder, Ana P. Tedim, Anastasia Kolyva, Maria Diaz, Leonardo de Oliveira Martins, Nabil-Fareed Alikhan, Lizzie Meadows, Rachael Stanley, Ngozi Elumogo, Muhammed Yasir, Nicholas M. Thomson, Alexander J Trotter, Rachel Gilroy, Samuel Bloomfield, Claire Stuart, Andrew Bell, Reenesh Prakash, Samir Dervisevic, Alison E. Mather, John Wain, Mark Webber, Andrew J. Page, Justin O'Grady |
| EPI_ISL_820282                                                                                                                                                                                                                                                                                                                                                                                                                                                                                                                                                                                                                                                                                                                                 |           | University College London, Great Ormond Street Hospital for Children NHS Foundation Trust, Imperial College Healthcare NHS Trust                                                 | COVID-19 Genomics UK (COG-UK) Consortium | Sergi Castellano, Rachel Williams, Mark Kristiansen, Paola Resende Silva, Sunando Roy, Tony Brooks, Helena Tutili, Paola Niola, Patricia Dyal, Charlotte Williams, Leysa Forrest, Yasmin Panchbhaya, Jacqueline Findlay, Samuel Weeks, Julianne Brown, Kathryn Harris, Paul Randell, James Price, Alison Holmes, Judith Breuer                                                                                                                            |
| EPI_ISL_820284, EPI_ISL_820287, EPI_ISL_820289, EPI_ISL_820292, EPI_ISL_820294                                                                                                                                                                                                                                                                                                                                                                                                                                                                                                                                                                                                                                                                 |           | Quadram Institute Bioscience                                                                                                                                                     | COVID-19 Genomics UK (COG-UK) Consortium | Dave J. Baker, Gemma L. Kay, Alp Aydin, Thanh Le-Viet, Steven Rudder, Ana P. Tedim, Anastasia Kolyva, Maria Diaz, Leonardo de Oliveira Martins, Nabil-Fareed Alikhan, Lizzie Meadows, Rachael Stanley, Ngozi Elumogo, Muhammed Yasir, Nicholas M. Thomson, Alexander J Trotter, Rachel Gilroy, Samuel Bloomfield, Claire Stuart, Andrew Bell, Reenesh Prakash, Samir Dervisevic, Alison E. Mather, John Wain, Mark Webber, Andrew J. Page, Justin O'Grady |
| EPI_ISL_820297                                                                                                                                                                                                                                                                                                                                                                                                                                                                                                                                                                                                                                                                                                                                 |           | Queens Medical Centre, Clinical Microbiology Department / DeepSeq Nottingham                                                                                                     | COVID-19 Genomics UK (COG-UK) Consortium | Gemma Clark, Wendy Smith, Manjinder Khakh, Vicki M Fleming, Michelle M Lister, Hannah Howson-Wells, Jonathan Ball, Patrick McClure, Joseph Chappell, Theocharis Tsoleridis, Nadine Holmes, Matthew Carlisle, Christopher Moore, Fei Sang, Johnny Debebe, Victoria Wright, Matthew Loose                                                                                                                                                                   |
| EPI_ISL_820300, EPI_ISL_820302, EPI_ISL_820304, EPI_ISL_820306                                                                                                                                                                                                                                                                                                                                                                                                                                                                                                                                                                                                                                                                                 |           | Quadram Institute Bioscience                                                                                                                                                     | COVID-19 Genomics UK (COG-UK) Consortium | Dave J. Baker, Gemma L. Kay, Alp Aydin, Thanh Le-Viet, Steven Rudder, Ana P. Tedim, Anastasia Kolyva, Maria Diaz, Leonardo de Oliveira Martins, Nabil-Fareed Alikhan, Lizzie Meadows, Rachael Stanley, Ngozi Elumogo, Muhammed Yasir, Nicholas M. Thomson, Alexander J Trotter, Rachel Gilroy, Samuel Bloomfield, Claire Stuart, Andrew Bell, Reenesh Prakash, Samir Dervisevic, Alison E. Mather, John Wain, Mark Webber, Andrew J. Page, Justin O'Grady |
| EPI_ISL_820309                                                                                                                                                                                                                                                                                                                                                                                                                                                                                                                                                                                                                                                                                                                                 |           | University College London, Great Ormond Street Hospital for Children NHS Foundation Trust, Imperial College Healthcare NHS Trust                                                 | COVID-19 Genomics UK (COG-UK) Consortium | Sergi Castellano, Rachel Williams, Mark Kristiansen, Paola Resende Silva, Sunando Roy, Tony Brooks, Helena Tutili, Paola Niola, Patricia Dyal, Charlotte Williams, Leysa Forrest, Yasmin Panchbhaya, Jacqueline Findlay, Samuel Weeks, Julianne Brown, Kathryn Harris, Paul Randell, James Price, Alison Holmes, Judith Breuer                                                                                                                            |
| EPI_ISL_820311                                                                                                                                                                                                                                                                                                                                                                                                                                                                                                                                                                                                                                                                                                                                 |           | Quadram Institute Bioscience                                                                                                                                                     | COVID-19 Genomics UK (COG-UK) Consortium | Dave J. Baker, Gemma L. Kay, Alp Aydin, Thanh Le-Viet, Steven Rudder, Ana P. Tedim, Anastasia Kolyva, Maria Diaz, Leonardo de Oliveira Martins, Nabil-Fareed Alikhan, Lizzie Meadows, Rachael Stanley, Ngozi Elumogo, Muhammed Yasir, Nicholas M. Thomson, Alexander J Trotter, Rachel Gilroy, Samuel Bloomfield, Claire Stuart, Andrew Bell, Reenesh Prakash, Samir Dervisevic, Alison E. Mather, John Wain, Mark Webber, Andrew J. Page, Justin O'Grady |
| EPI_ISL_820314, EPI_ISL_820316, EPI_ISL_820318, EPI_ISL_820321                                                                                                                                                                                                                                                                                                                                                                                                                                                                                                                                                                                                                                                                                 |           | University College London, Great Ormond Street Hospital for Children NHS Foundation Trust, Imperial College Healthcare NHS Trust                                                 | COVID-19 Genomics UK (COG-UK) Consortium | Sergi Castellano, Rachel Williams, Mark Kristiansen, Paola Resende Silva, Sunando Roy, Tony Brooks, Helena Tutili, Paola Niola, Patricia Dyal, Charlotte Williams, Leysa Forrest, Yasmin Panchbhaya, Jacqueline Findlay, Samuel Weeks, Julianne Brown, Kathryn Harris, Paul Randell, James Price, Alison Holmes, Judith Breuer                                                                                                                            |
| EPI_ISL_820323                                                                                                                                                                                                                                                                                                                                                                                                                                                                                                                                                                                                                                                                                                                                 |           | Quadram Institute Bioscience                                                                                                                                                     | COVID-19 Genomics UK (COG-UK) Consortium | Dave J. Baker, Gemma L. Kay, Alp Aydin, Thanh Le-Viet, Steven Rudder, Ana P. Tedim, Anastasia Kolyva, Maria Diaz, Leonardo de Oliveira Martins, Nabil-Fareed Alikhan, Lizzie Meadows, Rachael Stanley, Ngozi Elumogo, Muhammed Yasir, Nicholas M. Thomson, Alexander J Trotter, Rachel Gilroy, Samuel Bloomfield, Claire Stuart, Andrew Bell, Reenesh Prakash, Samir Dervisevic, Alison E. Mather, John Wain, Mark Webber, Andrew J. Page, Justin O'Grady |
| EPI_ISL_820326, EPI_ISL_820328, EPI_ISL_820331, EPI_ISL_820333, EPI_ISL_820335, EPI_ISL_820337, EPI_ISL_820340, EPI_ISL_820343, EPI_ISL_820345, EPI_ISL_820347, EPI_ISL_820350                                                                                                                                                                                                                                                                                                                                                                                                                                                                                                                                                                 | see above | University College London, Great Ormond Street Hospital for Children NHS Foundation Trust, Imperial College Healthcare NHS Trust                                                 | COVID-19 Genomics UK (COG-UK) Consortium | Sergi Castellano, Rachel Williams, Mark Kristiansen, Paola Resende Silva, Sunando Roy, Tony Brooks, Helena Tutili, Paola Niola, Patricia Dyal, Charlotte Williams, Leysa Forrest, Yasmin Panchbhaya, Jacqueline Findlay, Samuel Weeks, Julianne Brown, Kathryn Harris, Paul Randell, James Price, Alison Holmes, Judith Breuer                                                                                                                            |
| EPI_ISL_820353, EPI_ISL_820355, EPI_ISL_820358, EPI_ISL_820360, EPI_ISL_820363, EPI_ISL_820365, EPI_ISL_820368, EPI_ISL_820371                                                                                                                                                                                                                                                                                                                                                                                                                                                                                                                                                                                                                 |           | Quadram Institute Bioscience                                                                                                                                                     | COVID-19 Genomics UK (COG-UK) Consortium | Dave J. Baker, Gemma L. Kay, Alp Aydin, Thanh Le-Viet, Steven Rudder, Ana P. Tedim, Anastasia Kolyva, Maria Diaz, Leonardo de Oliveira Martins, Nabil-Fareed Alikhan, Lizzie Meadows, Rachael Stanley, Ngozi Elumogo, Muhammed Yasir, Nicholas M. Thomson, Alexander J Trotter, Rachel Gilroy, Samuel Bloomfield, Claire Stuart, Andrew Bell, Reenesh Prakash, Samir Dervisevic, Alison E. Mather, John Wain, Mark Webber, Andrew J. Page, Justin O'Grady |
| EPI_ISL_820373, EPI_ISL_820376                                                                                                                                                                                                                                                                                                                                                                                                                                                                                                                                                                                                                                                                                                                 |           | University College London, Great Ormond Street Hospital for Children NHS Foundation Trust, Imperial College Healthcare                                                           | COVID-19 Genomics UK (COG-UK) Consortium | Sergi Castellano, Rachel Williams, Mark Kristiansen, Paola Resende Silva, Sunando Roy, Tony Brooks, Helena Tutili, Paola Niola, Patricia Dyal, Charlotte Williams, Leysa Forrest, Yasmin Panchbhaya, Jacqueline Findlay, Samuel Weeks, Julianne Brown, Kathryn Harris, Paul Randell, James Price, Alison                                                                                                                                                  |

|                                                                                                                                                                                                                                                                                                                                                                                                                                                                                                                                                                                                                                                                                                                                                                                                                                                                                                                                                                                                                                                                                                                                                                                                                                                                                                                                                                                                                                                                                                                                                                                                                                                                                                                                                                |                                                                                                                                  |                                                                            |                                                                                                                                                                                                                                                                                                                                                                                                                                                           |
|----------------------------------------------------------------------------------------------------------------------------------------------------------------------------------------------------------------------------------------------------------------------------------------------------------------------------------------------------------------------------------------------------------------------------------------------------------------------------------------------------------------------------------------------------------------------------------------------------------------------------------------------------------------------------------------------------------------------------------------------------------------------------------------------------------------------------------------------------------------------------------------------------------------------------------------------------------------------------------------------------------------------------------------------------------------------------------------------------------------------------------------------------------------------------------------------------------------------------------------------------------------------------------------------------------------------------------------------------------------------------------------------------------------------------------------------------------------------------------------------------------------------------------------------------------------------------------------------------------------------------------------------------------------------------------------------------------------------------------------------------------------|----------------------------------------------------------------------------------------------------------------------------------|----------------------------------------------------------------------------|-----------------------------------------------------------------------------------------------------------------------------------------------------------------------------------------------------------------------------------------------------------------------------------------------------------------------------------------------------------------------------------------------------------------------------------------------------------|
|                                                                                                                                                                                                                                                                                                                                                                                                                                                                                                                                                                                                                                                                                                                                                                                                                                                                                                                                                                                                                                                                                                                                                                                                                                                                                                                                                                                                                                                                                                                                                                                                                                                                                                                                                                | NHS Trust                                                                                                                        |                                                                            | Holmes, Judith Breuer                                                                                                                                                                                                                                                                                                                                                                                                                                     |
| EPI_ISL_820378                                                                                                                                                                                                                                                                                                                                                                                                                                                                                                                                                                                                                                                                                                                                                                                                                                                                                                                                                                                                                                                                                                                                                                                                                                                                                                                                                                                                                                                                                                                                                                                                                                                                                                                                                 | Quadram Institute Bioscience                                                                                                     | COVID-19 Genomics UK (COG-UK) Consortium                                   | Dave J. Baker, Gemma L. Kay, Alp Aydin, Thanh Le-Viet, Steven Rudder, Ana P. Tedim, Anastasia Kolyva, Maria Diaz, Leonardo de Oliveira Martins, Nabil-Fareed Alikhan, Lizzie Meadows, Rachael Stanley, Ngozi Elumogo, Muhammed Yasir, Nicholas M. Thomson, Alexander J Trotter, Rachel Gilroy, Samuel Bloomfield, Claire Stuart, Andrew Bell, Reenesh Prakash, Samir Dervisevic, Alison E. Mather, John Wain, Mark Webber, Andrew J. Page, Justin O'Grady |
| EPI_ISL_820381, EPI_ISL_820383, EPI_ISL_820385                                                                                                                                                                                                                                                                                                                                                                                                                                                                                                                                                                                                                                                                                                                                                                                                                                                                                                                                                                                                                                                                                                                                                                                                                                                                                                                                                                                                                                                                                                                                                                                                                                                                                                                 | University College London, Great Ormond Street Hospital for Children NHS Foundation Trust, Imperial College Healthcare NHS Trust | COVID-19 Genomics UK (COG-UK) Consortium                                   | Sergi Castellano, Rachel Williams, Mark Kristiansen, Paola Resende Silva, Sunando Roy, Tony Brooks, Helena Tutill, Paola Niola, Patricia Dyal, Charlotte Williams, Leysa Forrest, Yasmin Panchbhaya, Jacqueline Findlay, Samuel Weeks, Julianne Brown, Kathryn Harris, Paul Randell, James Price, Alison Holmes, Judith Breuer                                                                                                                            |
| EPI_ISL_820388, EPI_ISL_820391                                                                                                                                                                                                                                                                                                                                                                                                                                                                                                                                                                                                                                                                                                                                                                                                                                                                                                                                                                                                                                                                                                                                                                                                                                                                                                                                                                                                                                                                                                                                                                                                                                                                                                                                 | Quadram Institute Bioscience                                                                                                     | COVID-19 Genomics UK (COG-UK) Consortium                                   | Dave J. Baker, Gemma L. Kay, Alp Aydin, Thanh Le-Viet, Steven Rudder, Ana P. Tedim, Anastasia Kolyva, Maria Diaz, Leonardo de Oliveira Martins, Nabil-Fareed Alikhan, Lizzie Meadows, Rachael Stanley, Ngozi Elumogo, Muhammed Yasir, Nicholas M. Thomson, Alexander J Trotter, Rachel Gilroy, Samuel Bloomfield, Claire Stuart, Andrew Bell, Reenesh Prakash, Samir Dervisevic, Alison E. Mather, John Wain, Mark Webber, Andrew J. Page, Justin O'Grady |
| EPI_ISL_820394                                                                                                                                                                                                                                                                                                                                                                                                                                                                                                                                                                                                                                                                                                                                                                                                                                                                                                                                                                                                                                                                                                                                                                                                                                                                                                                                                                                                                                                                                                                                                                                                                                                                                                                                                 | Queens Medical Centre, Clinical Microbiology Department / DeepSeq Nottingham                                                     | COVID-19 Genomics UK (COG-UK) Consortium                                   | Gemma Clark, Wendy Smith, Manjinder Khakh, Vicki M Fleming, Michelle M Lister, Hannah Howson-Wells, Jonathan Ball, Patrick McClure, Joseph Chappell, Theocharis Tsoleridis, Nadine Holmes, Matthew Carlisle, Christopher Moore, Fei Sang, Johnny Debebe, Victoria Wright, Matthew Loose                                                                                                                                                                   |
| EPI_ISL_820396                                                                                                                                                                                                                                                                                                                                                                                                                                                                                                                                                                                                                                                                                                                                                                                                                                                                                                                                                                                                                                                                                                                                                                                                                                                                                                                                                                                                                                                                                                                                                                                                                                                                                                                                                 | University College London, Great Ormond Street Hospital for Children NHS Foundation Trust, Imperial College Healthcare NHS Trust | COVID-19 Genomics UK (COG-UK) Consortium                                   | Sergi Castellano, Rachel Williams, Mark Kristiansen, Paola Resende Silva, Sunando Roy, Tony Brooks, Helena Tutill, Paola Niola, Patricia Dyal, Charlotte Williams, Leysa Forrest, Yasmin Panchbhaya, Jacqueline Findlay, Samuel Weeks, Julianne Brown, Kathryn Harris, Paul Randell, James Price, Alison Holmes, Judith Breuer                                                                                                                            |
| EPI_ISL_820399                                                                                                                                                                                                                                                                                                                                                                                                                                                                                                                                                                                                                                                                                                                                                                                                                                                                                                                                                                                                                                                                                                                                                                                                                                                                                                                                                                                                                                                                                                                                                                                                                                                                                                                                                 | Quadram Institute Bioscience                                                                                                     | COVID-19 Genomics UK (COG-UK) Consortium                                   | Dave J. Baker, Gemma L. Kay, Alp Aydin, Thanh Le-Viet, Steven Rudder, Ana P. Tedim, Anastasia Kolyva, Maria Diaz, Leonardo de Oliveira Martins, Nabil-Fareed Alikhan, Lizzie Meadows, Rachael Stanley, Ngozi Elumogo, Muhammed Yasir, Nicholas M. Thomson, Alexander J Trotter, Rachel Gilroy, Samuel Bloomfield, Claire Stuart, Andrew Bell, Reenesh Prakash, Samir Dervisevic, Alison E. Mather, John Wain, Mark Webber, Andrew J. Page, Justin O'Grady |
| EPI_ISL_820402                                                                                                                                                                                                                                                                                                                                                                                                                                                                                                                                                                                                                                                                                                                                                                                                                                                                                                                                                                                                                                                                                                                                                                                                                                                                                                                                                                                                                                                                                                                                                                                                                                                                                                                                                 | Queens Medical Centre, Clinical Microbiology Department / DeepSeq Nottingham                                                     | COVID-19 Genomics UK (COG-UK) Consortium                                   | Gemma Clark, Wendy Smith, Manjinder Khakh, Vicki M Fleming, Michelle M Lister, Hannah Howson-Wells, Jonathan Ball, Patrick McClure, Joseph Chappell, Theocharis Tsoleridis, Nadine Holmes, Matthew Carlisle, Christopher Moore, Fei Sang, Johnny Debebe, Victoria Wright, Matthew Loose                                                                                                                                                                   |
| EPI_ISL_820404, EPI_ISL_820407, EPI_ISL_820410, EPI_ISL_820412, EPI_ISL_820415                                                                                                                                                                                                                                                                                                                                                                                                                                                                                                                                                                                                                                                                                                                                                                                                                                                                                                                                                                                                                                                                                                                                                                                                                                                                                                                                                                                                                                                                                                                                                                                                                                                                                 | Quadram Institute Bioscience                                                                                                     | COVID-19 Genomics UK (COG-UK) Consortium                                   | Dave J. Baker, Gemma L. Kay, Alp Aydin, Thanh Le-Viet, Steven Rudder, Ana P. Tedim, Anastasia Kolyva, Maria Diaz, Leonardo de Oliveira Martins, Nabil-Fareed Alikhan, Lizzie Meadows, Rachael Stanley, Ngozi Elumogo, Muhammed Yasir, Nicholas M. Thomson, Alexander J Trotter, Rachel Gilroy, Samuel Bloomfield, Claire Stuart, Andrew Bell, Reenesh Prakash, Samir Dervisevic, Alison E. Mather, John Wain, Mark Webber, Andrew J. Page, Justin O'Grady |
| EPI_ISL_820418                                                                                                                                                                                                                                                                                                                                                                                                                                                                                                                                                                                                                                                                                                                                                                                                                                                                                                                                                                                                                                                                                                                                                                                                                                                                                                                                                                                                                                                                                                                                                                                                                                                                                                                                                 | Queens Medical Centre, Clinical Microbiology Department / DeepSeq Nottingham                                                     | COVID-19 Genomics UK (COG-UK) Consortium                                   | Gemma Clark, Wendy Smith, Manjinder Khakh, Vicki M Fleming, Michelle M Lister, Hannah Howson-Wells, Jonathan Ball, Patrick McClure, Joseph Chappell, Theocharis Tsoleridis, Nadine Holmes, Matthew Carlisle, Christopher Moore, Fei Sang, Johnny Debebe, Victoria Wright, Matthew Loose                                                                                                                                                                   |
| EPI_ISL_820420                                                                                                                                                                                                                                                                                                                                                                                                                                                                                                                                                                                                                                                                                                                                                                                                                                                                                                                                                                                                                                                                                                                                                                                                                                                                                                                                                                                                                                                                                                                                                                                                                                                                                                                                                 | University College London, Great Ormond Street Hospital for Children NHS Foundation Trust, Imperial College Healthcare NHS Trust | COVID-19 Genomics UK (COG-UK) Consortium                                   | Sergi Castellano, Rachel Williams, Mark Kristiansen, Paola Resende Silva, Sunando Roy, Tony Brooks, Helena Tutill, Paola Niola, Patricia Dyal, Charlotte Williams, Leysa Forrest, Yasmin Panchbhaya, Jacqueline Findlay, Samuel Weeks, Julianne Brown, Kathryn Harris, Paul Randell, James Price, Alison Holmes, Judith Breuer                                                                                                                            |
| EPI_ISL_820423                                                                                                                                                                                                                                                                                                                                                                                                                                                                                                                                                                                                                                                                                                                                                                                                                                                                                                                                                                                                                                                                                                                                                                                                                                                                                                                                                                                                                                                                                                                                                                                                                                                                                                                                                 | Queens Medical Centre, Clinical Microbiology Department / DeepSeq Nottingham                                                     | COVID-19 Genomics UK (COG-UK) Consortium                                   | Gemma Clark, Wendy Smith, Manjinder Khakh, Vicki M Fleming, Michelle M Lister, Hannah Howson-Wells, Jonathan Ball, Patrick McClure, Joseph Chappell, Theocharis Tsoleridis, Nadine Holmes, Matthew Carlisle, Christopher Moore, Fei Sang, Johnny Debebe, Victoria Wright, Matthew Loose                                                                                                                                                                   |
| EPI_ISL_820426                                                                                                                                                                                                                                                                                                                                                                                                                                                                                                                                                                                                                                                                                                                                                                                                                                                                                                                                                                                                                                                                                                                                                                                                                                                                                                                                                                                                                                                                                                                                                                                                                                                                                                                                                 | Quadram Institute Bioscience                                                                                                     | COVID-19 Genomics UK (COG-UK) Consortium                                   | Dave J. Baker, Gemma L. Kay, Alp Aydin, Thanh Le-Viet, Steven Rudder, Ana P. Tedim, Anastasia Kolyva, Maria Diaz, Leonardo de Oliveira Martins, Nabil-Fareed Alikhan, Lizzie Meadows, Rachael Stanley, Ngozi Elumogo, Muhammed Yasir, Nicholas M. Thomson, Alexander J Trotter, Rachel Gilroy, Samuel Bloomfield, Claire Stuart, Andrew Bell, Reenesh Prakash, Samir Dervisevic, Alison E. Mather, John Wain, Mark Webber, Andrew J. Page, Justin O'Grady |
| EPI_ISL_820428, EPI_ISL_820431, EPI_ISL_820433                                                                                                                                                                                                                                                                                                                                                                                                                                                                                                                                                                                                                                                                                                                                                                                                                                                                                                                                                                                                                                                                                                                                                                                                                                                                                                                                                                                                                                                                                                                                                                                                                                                                                                                 | Queens Medical Centre, Clinical Microbiology Department / DeepSeq Nottingham                                                     | COVID-19 Genomics UK (COG-UK) Consortium                                   | Gemma Clark, Wendy Smith, Manjinder Khakh, Vicki M Fleming, Michelle M Lister, Hannah Howson-Wells, Jonathan Ball, Patrick McClure, Joseph Chappell, Theocharis Tsoleridis, Nadine Holmes, Matthew Carlisle, Christopher Moore, Fei Sang, Johnny Debebe, Victoria Wright, Matthew Loose                                                                                                                                                                   |
| EPI_ISL_820436, EPI_ISL_820439, EPI_ISL_820441, EPI_ISL_820444, EPI_ISL_820446, EPI_ISL_820449, EPI_ISL_820451, EPI_ISL_820454, EPI_ISL_820456, EPI_ISL_820459, EPI_ISL_820462, EPI_ISL_820464, EPI_ISL_820467, EPI_ISL_820470, EPI_ISL_820472, EPI_ISL_820475, EPI_ISL_820478, EPI_ISL_820480, EPI_ISL_820483, EPI_ISL_820485, EPI_ISL_820488, EPI_ISL_820490, EPI_ISL_820493, EPI_ISL_820496, EPI_ISL_820498, EPI_ISL_820501, EPI_ISL_820504, EPI_ISL_820506, EPI_ISL_820509, EPI_ISL_820511, EPI_ISL_820514, EPI_ISL_820516, EPI_ISL_820519, EPI_ISL_820521, EPI_ISL_820524, EPI_ISL_820526, EPI_ISL_820528, EPI_ISL_820531, EPI_ISL_820533, EPI_ISL_820536, EPI_ISL_820539, EPI_ISL_820541, EPI_ISL_820543, EPI_ISL_820546, EPI_ISL_820549, EPI_ISL_820552, EPI_ISL_820554, EPI_ISL_820557                                                                                                                                                                                                                                                                                                                                                                                                                                                                                                                                                                                                                                                                                                                                                                                                                                                                                                                                                                 |                                                                                                                                  |                                                                            |                                                                                                                                                                                                                                                                                                                                                                                                                                                           |
| see above                                                                                                                                                                                                                                                                                                                                                                                                                                                                                                                                                                                                                                                                                                                                                                                                                                                                                                                                                                                                                                                                                                                                                                                                                                                                                                                                                                                                                                                                                                                                                                                                                                                                                                                                                      | Quadram Institute Bioscience                                                                                                     | COVID-19 Genomics UK (COG-UK) Consortium                                   | Dave J. Baker, Gemma L. Kay, Alp Aydin, Thanh Le-Viet, Steven Rudder, Ana P. Tedim, Anastasia Kolyva, Maria Diaz, Leonardo de Oliveira Martins, Nabil-Fareed Alikhan, Lizzie Meadows, Rachael Stanley, Ngozi Elumogo, Muhammed Yasir, Nicholas M. Thomson, Alexander J Trotter, Rachel Gilroy, Samuel Bloomfield, Claire Stuart, Andrew Bell, Reenesh Prakash, Samir Dervisevic, Alison E. Mather, John Wain, Mark Webber, Andrew J. Page, Justin O'Grady |
| EPI_ISL_820560                                                                                                                                                                                                                                                                                                                                                                                                                                                                                                                                                                                                                                                                                                                                                                                                                                                                                                                                                                                                                                                                                                                                                                                                                                                                                                                                                                                                                                                                                                                                                                                                                                                                                                                                                 | Queens Medical Centre, Clinical Microbiology Department / DeepSeq Nottingham                                                     | COVID-19 Genomics UK (COG-UK) Consortium                                   | Gemma Clark, Wendy Smith, Manjinder Khakh, Vicki M Fleming, Michelle M Lister, Hannah Howson-Wells, Jonathan Ball, Patrick McClure, Joseph Chappell, Theocharis Tsoleridis, Nadine Holmes, Matthew Carlisle, Christopher Moore, Fei Sang, Johnny Debebe, Victoria Wright, Matthew Loose                                                                                                                                                                   |
| EPI_ISL_820563, EPI_ISL_820565, EPI_ISL_820568, EPI_ISL_820570                                                                                                                                                                                                                                                                                                                                                                                                                                                                                                                                                                                                                                                                                                                                                                                                                                                                                                                                                                                                                                                                                                                                                                                                                                                                                                                                                                                                                                                                                                                                                                                                                                                                                                 | Quadram Institute Bioscience                                                                                                     | COVID-19 Genomics UK (COG-UK) Consortium                                   | Dave J. Baker, Gemma L. Kay, Alp Aydin, Thanh Le-Viet, Steven Rudder, Ana P. Tedim, Anastasia Kolyva, Maria Diaz, Leonardo de Oliveira Martins, Nabil-Fareed Alikhan, Lizzie Meadows, Rachael Stanley, Ngozi Elumogo, Muhammed Yasir, Nicholas M. Thomson, Alexander J Trotter, Rachel Gilroy, Samuel Bloomfield, Claire Stuart, Andrew Bell, Reenesh Prakash, Samir Dervisevic, Alison E. Mather, John Wain, Mark Webber, Andrew J. Page, Justin O'Grady |
| EPI_ISL_821003, EPI_ISL_821005, EPI_ISL_821010, EPI_ISL_821011, EPI_ISL_821012, EPI_ISL_821013, EPI_ISL_821018, EPI_ISL_821020, EPI_ISL_821021, EPI_ISL_821022, EPI_ISL_821025, EPI_ISL_821026, EPI_ISL_821028, EPI_ISL_821030, EPI_ISL_821035, EPI_ISL_821036, EPI_ISL_821038, EPI_ISL_821039, EPI_ISL_821042, EPI_ISL_821046, EPI_ISL_821047, EPI_ISL_821050, EPI_ISL_821055, EPI_ISL_821060, EPI_ISL_821063, EPI_ISL_821066, EPI_ISL_821068, EPI_ISL_821073, EPI_ISL_821074, EPI_ISL_821078, EPI_ISL_821082, EPI_ISL_821084, EPI_ISL_821085, EPI_ISL_821090, EPI_ISL_821091, EPI_ISL_821093, EPI_ISL_821095, EPI_ISL_821099, EPI_ISL_821102, EPI_ISL_821104, EPI_ISL_821109, EPI_ISL_821110, EPI_ISL_821111, EPI_ISL_821117, EPI_ISL_821124, EPI_ISL_821125, EPI_ISL_821126, EPI_ISL_821127, EPI_ISL_821128, EPI_ISL_821131, EPI_ISL_821133, EPI_ISL_821134, EPI_ISL_821136, EPI_ISL_821137, EPI_ISL_821140, EPI_ISL_821144, EPI_ISL_821149, EPI_ISL_821151, EPI_ISL_821152, EPI_ISL_821156, EPI_ISL_821158, EPI_ISL_821159, EPI_ISL_821163, EPI_ISL_821165, EPI_ISL_821166, EPI_ISL_821169, EPI_ISL_821170, EPI_ISL_821172, EPI_ISL_821173, EPI_ISL_821174, EPI_ISL_821175, EPI_ISL_821178, EPI_ISL_821180, EPI_ISL_821181, EPI_ISL_821187, EPI_ISL_821190, EPI_ISL_821191, EPI_ISL_821194, EPI_ISL_821197, EPI_ISL_821199, EPI_ISL_821200, EPI_ISL_821201, EPI_ISL_821206, EPI_ISL_821208, EPI_ISL_821214, EPI_ISL_821215, EPI_ISL_821220, EPI_ISL_821222, EPI_ISL_821223, EPI_ISL_821228, EPI_ISL_821230, EPI_ISL_821231, EPI_ISL_821235, EPI_ISL_821243, EPI_ISL_821244, EPI_ISL_821248, EPI_ISL_821250, EPI_ISL_821251, EPI_ISL_821253, EPI_ISL_821254, EPI_ISL_821255, EPI_ISL_821261, EPI_ISL_821263, EPI_ISL_821264, EPI_ISL_821270, EPI_ISL_821271 |                                                                                                                                  |                                                                            |                                                                                                                                                                                                                                                                                                                                                                                                                                                           |
| see above                                                                                                                                                                                                                                                                                                                                                                                                                                                                                                                                                                                                                                                                                                                                                                                                                                                                                                                                                                                                                                                                                                                                                                                                                                                                                                                                                                                                                                                                                                                                                                                                                                                                                                                                                      | Lighthouse Lab in Alderley Park                                                                                                  | Wellcome Sanger Institute for the COVID-19 Genomics UK (COG-UK) Consortium | Jacquelyn Wynn, Mairead Hyland, The Lighthouse Lab in Alderley Park and Alex Alderton, Roberto Amato, Sonia Goncalves, Ewan Harrison, David K. Jackson, Ian Johnston, Dominic Kwiatkowski, Cordelia Langford, John Sillitoe on behalf of the Wellcome Sanger Institute COVID-19 Surveillance Team                                                                                                                                                         |
| EPI_ISL_821275, EPI_ISL_821277                                                                                                                                                                                                                                                                                                                                                                                                                                                                                                                                                                                                                                                                                                                                                                                                                                                                                                                                                                                                                                                                                                                                                                                                                                                                                                                                                                                                                                                                                                                                                                                                                                                                                                                                 | Lighthouse Lab in Milton Keynes                                                                                                  | Wellcome Sanger Institute for the COVID-19 Genomics UK (COG-UK) Consortium | The Lighthouse Lab in Milton Keynes and Alex Alderton, Roberto Amato, Sonia Goncalves, Ewan Harrison, David K. Jackson, Ian Johnston, Dominic Kwiatkowski, Cordelia Langford, John Sillitoe on behalf of the Wellcome Sanger Institute COVID-19 Surveillance Team                                                                                                                                                                                         |
| EPI_ISL_821278                                                                                                                                                                                                                                                                                                                                                                                                                                                                                                                                                                                                                                                                                                                                                                                                                                                                                                                                                                                                                                                                                                                                                                                                                                                                                                                                                                                                                                                                                                                                                                                                                                                                                                                                                 | Lighthouse Lab in Cambridge                                                                                                      | Wellcome Sanger Institute for the COVID-19 Genomics UK (COG-UK) Consortium | Rob Howes, The Lighthouse Lab in Cambridge and Alex Alderton, Roberto Amato, Sonia Goncalves, Ewan Harrison, David K. Jackson, Ian Johnston, Dominic Kwiatkowski, Cordelia Langford, John Sillitoe on behalf of the Wellcome Sanger Institute COVID-19 Surveillance Team                                                                                                                                                                                  |
| EPI_ISL_821280                                                                                                                                                                                                                                                                                                                                                                                                                                                                                                                                                                                                                                                                                                                                                                                                                                                                                                                                                                                                                                                                                                                                                                                                                                                                                                                                                                                                                                                                                                                                                                                                                                                                                                                                                 | Lighthouse Lab in Milton Keynes                                                                                                  | Wellcome Sanger Institute for the COVID-19 Genomics UK (COG-UK) Consortium | The Lighthouse Lab in Milton Keynes and Alex Alderton, Roberto Amato, Sonia Goncalves, Ewan Harrison, David K. Jackson, Ian Johnston, Dominic Kwiatkowski, Cordelia Langford, John Sillitoe on behalf of the Wellcome Sanger Institute COVID-19 Surveillance Team                                                                                                                                                                                         |
| EPI_ISL_821285                                                                                                                                                                                                                                                                                                                                                                                                                                                                                                                                                                                                                                                                                                                                                                                                                                                                                                                                                                                                                                                                                                                                                                                                                                                                                                                                                                                                                                                                                                                                                                                                                                                                                                                                                 | Lighthouse Lab in Alderley Park                                                                                                  | Wellcome Sanger Institute for the COVID-19 Genomics UK (COG-UK) Consortium | Jacquelyn Wynn, Mairead Hyland, The Lighthouse Lab in Alderley Park and Alex Alderton, Roberto Amato, Sonia Goncalves, Ewan Harrison, David K. Jackson, Ian Johnston, Dominic Kwiatkowski, Cordelia Langford, John Sillitoe on behalf of the Wellcome Sanger Institute COVID-19 Surveillance Team                                                                                                                                                         |
| EPI_ISL_821286                                                                                                                                                                                                                                                                                                                                                                                                                                                                                                                                                                                                                                                                                                                                                                                                                                                                                                                                                                                                                                                                                                                                                                                                                                                                                                                                                                                                                                                                                                                                                                                                                                                                                                                                                 | Lighthouse Lab in Cambridge                                                                                                      | Wellcome Sanger Institute for the COVID-19 Genomics UK (COG-UK) Consortium | Rob Howes, The Lighthouse Lab in Cambridge and Alex Alderton, Roberto Amato, Sonia Goncalves, Ewan Harrison, David K. Jackson, Ian Johnston, Dominic Kwiatkowski, Cordelia Langford, John Sillitoe on behalf of the Wellcome Sanger Institute COVID-19 Surveillance Team                                                                                                                                                                                  |
| EPI_ISL_821287, EPI_ISL_821291                                                                                                                                                                                                                                                                                                                                                                                                                                                                                                                                                                                                                                                                                                                                                                                                                                                                                                                                                                                                                                                                                                                                                                                                                                                                                                                                                                                                                                                                                                                                                                                                                                                                                                                                 | Lighthouse Lab in Milton Keynes                                                                                                  | Wellcome Sanger Institute for the COVID-19 Genomics UK (COG-UK) Consortium | The Lighthouse Lab in Milton Keynes and Alex Alderton, Roberto Amato, Sonia Goncalves, Ewan Harrison, David K. Jackson, Ian Johnston, Dominic Kwiatkowski, Cordelia Langford, John Sillitoe on behalf of the Wellcome Sanger Institute COVID-19 Surveillance Team                                                                                                                                                                                         |
| EPI_ISL_821292                                                                                                                                                                                                                                                                                                                                                                                                                                                                                                                                                                                                                                                                                                                                                                                                                                                                                                                                                                                                                                                                                                                                                                                                                                                                                                                                                                                                                                                                                                                                                                                                                                                                                                                                                 | Lighthouse Lab in Alderley Park                                                                                                  | Wellcome Sanger Institute for the COVID-19 Genomics UK                     | Jacquelyn Wynn, Mairead Hyland, The Lighthouse Lab in Alderley Park and Alex Alderton, Roberto Amato, Sonia Goncalves, Ewan Harrison, David K.                                                                                                                                                                                                                                                                                                            |

[illegible]

[illegible]

[illegible]

|                                                                                                                                                                                                                                                                                                                                                                                                                                                                                                                                                                                                                                                                                                                                                                                                                                                                                                                                                                                                                                                                                                                                                                                                                                                                                                                                                                                                                                                                                                                                                                                                                                                                                                                                                                                                                                                                                                                                                                                                                                                                                                                                                                                                                                                                                                                                                                                                                                                                                                                                                                                                                                                                                                                                                                                                                                                                                                                                                                                                                                                                                                                                                                                                                                                                                                                                                                                                                                                                                                                                                                                                                                                                                                                                                                                                                                                                                                                                                                                                                                                                                                                                                                                                                                                                                                                                                                                                                                                                                                                                                                                                                                                                                                                                                                                                                                                                                                                                                                                                                                                                                                                                                                                                                                                                                                                                                                                                                                                                                                                                                                                                                                                                                                                                                                                                                                                                                                                                                                |           |                                                                         |                                                                            |                                                                                                                                                                                                                                                                                                                                                                           |
|----------------------------------------------------------------------------------------------------------------------------------------------------------------------------------------------------------------------------------------------------------------------------------------------------------------------------------------------------------------------------------------------------------------------------------------------------------------------------------------------------------------------------------------------------------------------------------------------------------------------------------------------------------------------------------------------------------------------------------------------------------------------------------------------------------------------------------------------------------------------------------------------------------------------------------------------------------------------------------------------------------------------------------------------------------------------------------------------------------------------------------------------------------------------------------------------------------------------------------------------------------------------------------------------------------------------------------------------------------------------------------------------------------------------------------------------------------------------------------------------------------------------------------------------------------------------------------------------------------------------------------------------------------------------------------------------------------------------------------------------------------------------------------------------------------------------------------------------------------------------------------------------------------------------------------------------------------------------------------------------------------------------------------------------------------------------------------------------------------------------------------------------------------------------------------------------------------------------------------------------------------------------------------------------------------------------------------------------------------------------------------------------------------------------------------------------------------------------------------------------------------------------------------------------------------------------------------------------------------------------------------------------------------------------------------------------------------------------------------------------------------------------------------------------------------------------------------------------------------------------------------------------------------------------------------------------------------------------------------------------------------------------------------------------------------------------------------------------------------------------------------------------------------------------------------------------------------------------------------------------------------------------------------------------------------------------------------------------------------------------------------------------------------------------------------------------------------------------------------------------------------------------------------------------------------------------------------------------------------------------------------------------------------------------------------------------------------------------------------------------------------------------------------------------------------------------------------------------------------------------------------------------------------------------------------------------------------------------------------------------------------------------------------------------------------------------------------------------------------------------------------------------------------------------------------------------------------------------------------------------------------------------------------------------------------------------------------------------------------------------------------------------------------------------------------------------------------------------------------------------------------------------------------------------------------------------------------------------------------------------------------------------------------------------------------------------------------------------------------------------------------------------------------------------------------------------------------------------------------------------------------------------------------------------------------------------------------------------------------------------------------------------------------------------------------------------------------------------------------------------------------------------------------------------------------------------------------------------------------------------------------------------------------------------------------------------------------------------------------------------------------------------------------------------------------------------------------------------------------------------------------------------------------------------------------------------------------------------------------------------------------------------------------------------------------------------------------------------------------------------------------------------------------------------------------------------------------------------------------------------------------------------------------------------------------------------------------------|-----------|-------------------------------------------------------------------------|----------------------------------------------------------------------------|---------------------------------------------------------------------------------------------------------------------------------------------------------------------------------------------------------------------------------------------------------------------------------------------------------------------------------------------------------------------------|
| EPI_ISL_821698, EPI_ISL_821699, EPI_ISL_821700, EPI_ISL_821701, EPI_ISL_821702, EPI_ISL_821703, EPI_ISL_821704, EPI_ISL_821705, EPI_ISL_821706, EPI_ISL_821707, EPI_ISL_821708, EPI_ISL_821709, EPI_ISL_821710, EPI_ISL_821711, EPI_ISL_821712, EPI_ISL_821713, EPI_ISL_821714, EPI_ISL_821715, EPI_ISL_821716, EPI_ISL_821717, EPI_ISL_821718, EPI_ISL_821719, EPI_ISL_821720, EPI_ISL_821721, EPI_ISL_821722, EPI_ISL_821723, EPI_ISL_821724, EPI_ISL_821725, EPI_ISL_821726, EPI_ISL_821727, EPI_ISL_821728, EPI_ISL_821729, EPI_ISL_821730, EPI_ISL_821731, EPI_ISL_821732, EPI_ISL_821733, EPI_ISL_821734, EPI_ISL_821735, EPI_ISL_821736, EPI_ISL_821737, EPI_ISL_821738, EPI_ISL_821739, EPI_ISL_821740, EPI_ISL_821741, EPI_ISL_821742, EPI_ISL_821743, EPI_ISL_821744, EPI_ISL_821745, EPI_ISL_821746, EPI_ISL_821747, EPI_ISL_821748, EPI_ISL_821749, EPI_ISL_821750, EPI_ISL_821751, EPI_ISL_821752, EPI_ISL_821753, EPI_ISL_821754, EPI_ISL_821755, EPI_ISL_821756, EPI_ISL_821757, EPI_ISL_821758, EPI_ISL_821759, EPI_ISL_821760, EPI_ISL_821761, EPI_ISL_821762, EPI_ISL_821763, EPI_ISL_821764, EPI_ISL_821765, EPI_ISL_821766, EPI_ISL_821767, EPI_ISL_821768, EPI_ISL_821769, EPI_ISL_821770, EPI_ISL_821771, EPI_ISL_821772, EPI_ISL_821773, EPI_ISL_821774, EPI_ISL_821775, EPI_ISL_821776, EPI_ISL_821777, EPI_ISL_821778, EPI_ISL_821779, EPI_ISL_821780, EPI_ISL_821781, EPI_ISL_821782, EPI_ISL_821783, EPI_ISL_821784, EPI_ISL_821785, EPI_ISL_821786, EPI_ISL_821787, EPI_ISL_821788, EPI_ISL_821789, EPI_ISL_821790, EPI_ISL_821791, EPI_ISL_821792, EPI_ISL_821793, EPI_ISL_821794, EPI_ISL_821795, EPI_ISL_821796, EPI_ISL_821797, EPI_ISL_821798, EPI_ISL_821799, EPI_ISL_821800, EPI_ISL_821801, EPI_ISL_821802, EPI_ISL_821803, EPI_ISL_821804, EPI_ISL_821805, EPI_ISL_821806, EPI_ISL_821807, EPI_ISL_821808, EPI_ISL_821809, EPI_ISL_821810, EPI_ISL_821811, EPI_ISL_821812, EPI_ISL_821813, EPI_ISL_821814, EPI_ISL_821815, EPI_ISL_821816, EPI_ISL_821817, EPI_ISL_821818, EPI_ISL_821819, EPI_ISL_821820, EPI_ISL_821821, EPI_ISL_821822, EPI_ISL_821823, EPI_ISL_821824, EPI_ISL_821825, EPI_ISL_821826, EPI_ISL_821827, EPI_ISL_821828, EPI_ISL_821829, EPI_ISL_821830, EPI_ISL_821831, EPI_ISL_821832, EPI_ISL_821833, EPI_ISL_821834, EPI_ISL_821835, EPI_ISL_821836, EPI_ISL_821837, EPI_ISL_821838, EPI_ISL_821839, EPI_ISL_821840, EPI_ISL_821841, EPI_ISL_821842, EPI_ISL_821843, EPI_ISL_821844, EPI_ISL_821845, EPI_ISL_821846, EPI_ISL_821847, EPI_ISL_821848, EPI_ISL_821849, EPI_ISL_821850, EPI_ISL_821851, EPI_ISL_821852, EPI_ISL_821853, EPI_ISL_821854, EPI_ISL_821855, EPI_ISL_821856, EPI_ISL_821857, EPI_ISL_821858, EPI_ISL_821859, EPI_ISL_821860, EPI_ISL_821861, EPI_ISL_821862, EPI_ISL_821863, EPI_ISL_821864, EPI_ISL_821865, EPI_ISL_821866, EPI_ISL_821867, EPI_ISL_821868, EPI_ISL_821869, EPI_ISL_821870, EPI_ISL_821871, EPI_ISL_821872, EPI_ISL_821873, EPI_ISL_821874, EPI_ISL_821875, EPI_ISL_821876, EPI_ISL_821877, EPI_ISL_821878, EPI_ISL_821879, EPI_ISL_821880, EPI_ISL_821881, EPI_ISL_821882, EPI_ISL_821883, EPI_ISL_821885, EPI_ISL_821886, EPI_ISL_821887, EPI_ISL_821888, EPI_ISL_821889, EPI_ISL_821890, EPI_ISL_821891, EPI_ISL_821892, EPI_ISL_821893, EPI_ISL_821894, EPI_ISL_821895, EPI_ISL_821896, EPI_ISL_821897, EPI_ISL_821898, EPI_ISL_821899, EPI_ISL_821900, EPI_ISL_821901, EPI_ISL_821902, EPI_ISL_821903, EPI_ISL_821904, EPI_ISL_821905, EPI_ISL_821906, EPI_ISL_821907, EPI_ISL_821908, EPI_ISL_821909, EPI_ISL_821910, EPI_ISL_821911, EPI_ISL_821912, EPI_ISL_821913, EPI_ISL_821914, EPI_ISL_821915, EPI_ISL_821916, EPI_ISL_821917, EPI_ISL_821918, EPI_ISL_821919, EPI_ISL_821920, EPI_ISL_821921, EPI_ISL_821922, EPI_ISL_821923, EPI_ISL_821924, EPI_ISL_821925, EPI_ISL_821926, EPI_ISL_821927, EPI_ISL_821928, EPI_ISL_821929, EPI_ISL_821930, EPI_ISL_821931, EPI_ISL_821932, EPI_ISL_821933, EPI_ISL_821934, EPI_ISL_821935, EPI_ISL_821936, EPI_ISL_821937, EPI_ISL_821938, EPI_ISL_821939, EPI_ISL_821940, EPI_ISL_821941, EPI_ISL_821942, EPI_ISL_821943, EPI_ISL_821944, EPI_ISL_821945, EPI_ISL_821946, EPI_ISL_821947, EPI_ISL_821948, EPI_ISL_821949, EPI_ISL_821950, EPI_ISL_821951, EPI_ISL_821952, EPI_ISL_821953, EPI_ISL_821954, EPI_ISL_821955, EPI_ISL_821956, EPI_ISL_821957, EPI_ISL_821958, EPI_ISL_821959, EPI_ISL_821960, EPI_ISL_821961, EPI_ISL_821962, EPI_ISL_821963, EPI_ISL_821964, EPI_ISL_821965, EPI_ISL_821966, EPI_ISL_821968, EPI_ISL_821969, EPI_ISL_821970                                                                                                                                                                                                                                                                                                                                                                                                                                                                                                                                                                                                                                                                                                                                                                                                                                                                                                                                                                                                                                                                                                                                                                                                                                                                                                                                                                                                                                                 | see above | Lighthouse Lab in Cambridge                                             | Wellcome Sanger Institute for the COVID-19 Genomics UK (COG-UK) Consortium | Rob Howes, The Lighthouse Lab in Cambridge and Alex Alderton, Roberto Amato, Sonia Goncalves, Ewan Harrison, David K. Jackson, Ian Johnston, Dominic Kwiatkowski, Cordelia Langford, John Sillitoe on behalf of the Wellcome Sanger Institute COVID-19 Surveillance Team                                                                                                  |
| EPI_ISL_821971, EPI_ISL_821972, EPI_ISL_821973, EPI_ISL_821974, EPI_ISL_821976, EPI_ISL_821977, EPI_ISL_821978, EPI_ISL_821979, EPI_ISL_821980, EPI_ISL_821981, EPI_ISL_821982, EPI_ISL_821983, EPI_ISL_821984, EPI_ISL_821985, EPI_ISL_821986, EPI_ISL_821989, EPI_ISL_821990, EPI_ISL_821991, EPI_ISL_821992, EPI_ISL_821994, EPI_ISL_821996, EPI_ISL_821997, EPI_ISL_821998, EPI_ISL_821999, EPI_ISL_822000, EPI_ISL_822002, EPI_ISL_822003, EPI_ISL_822007, EPI_ISL_822008, EPI_ISL_822009, EPI_ISL_822010, EPI_ISL_822012, EPI_ISL_822013, EPI_ISL_822014, EPI_ISL_822015, EPI_ISL_822016, EPI_ISL_822017, EPI_ISL_822018, EPI_ISL_822019, EPI_ISL_822020, EPI_ISL_822021, EPI_ISL_822024, EPI_ISL_822025, EPI_ISL_822026, EPI_ISL_822027, EPI_ISL_822028, EPI_ISL_822030, EPI_ISL_822031, EPI_ISL_822032, EPI_ISL_822037, EPI_ISL_822038, EPI_ISL_822039, EPI_ISL_822042, EPI_ISL_822043, EPI_ISL_822045, EPI_ISL_822046, EPI_ISL_822047, EPI_ISL_822049, EPI_ISL_822050, EPI_ISL_822052, EPI_ISL_822053, EPI_ISL_822054, EPI_ISL_822055, EPI_ISL_822056, EPI_ISL_822057, EPI_ISL_822058, EPI_ISL_822059, EPI_ISL_822060, EPI_ISL_822061, EPI_ISL_822062, EPI_ISL_822063, EPI_ISL_822064, EPI_ISL_822065, EPI_ISL_822066, EPI_ISL_822068, EPI_ISL_822070, EPI_ISL_822071, EPI_ISL_822073, EPI_ISL_822074, EPI_ISL_822075, EPI_ISL_822076, EPI_ISL_822077, EPI_ISL_822079, EPI_ISL_822081, EPI_ISL_822082, EPI_ISL_822084, EPI_ISL_822085, EPI_ISL_822087, EPI_ISL_822088, EPI_ISL_822089, EPI_ISL_822090, EPI_ISL_822091, EPI_ISL_822092, EPI_ISL_822093, EPI_ISL_822094, EPI_ISL_822095, EPI_ISL_822096, EPI_ISL_822097, EPI_ISL_822098, EPI_ISL_822099, EPI_ISL_822100, EPI_ISL_822101, EPI_ISL_822102, EPI_ISL_822103, EPI_ISL_822104, EPI_ISL_822105, EPI_ISL_822106, EPI_ISL_822107, EPI_ISL_822108, EPI_ISL_822109, EPI_ISL_822110, EPI_ISL_822111, EPI_ISL_822112, EPI_ISL_822114, EPI_ISL_822115, EPI_ISL_822116, EPI_ISL_822118, EPI_ISL_822119, EPI_ISL_822120, EPI_ISL_822121, EPI_ISL_822122, EPI_ISL_822123, EPI_ISL_822124, EPI_ISL_822125, EPI_ISL_822126, EPI_ISL_822127, EPI_ISL_822128, EPI_ISL_822129, EPI_ISL_822130, EPI_ISL_822131, EPI_ISL_822132, EPI_ISL_822133, EPI_ISL_822134, EPI_ISL_822135, EPI_ISL_822136, EPI_ISL_822137, EPI_ISL_822138, EPI_ISL_822139, EPI_ISL_822141, EPI_ISL_822142, EPI_ISL_822143, EPI_ISL_822144, EPI_ISL_822145, EPI_ISL_822146, EPI_ISL_822147, EPI_ISL_822149, EPI_ISL_822150, EPI_ISL_822151, EPI_ISL_822152, EPI_ISL_822154, EPI_ISL_822155, EPI_ISL_822157, EPI_ISL_822160, EPI_ISL_822161, EPI_ISL_822162, EPI_ISL_822163, EPI_ISL_822164, EPI_ISL_822166, EPI_ISL_822167, EPI_ISL_822168, EPI_ISL_822171, EPI_ISL_822172, EPI_ISL_822173, EPI_ISL_822174, EPI_ISL_822175, EPI_ISL_822176, EPI_ISL_822177, EPI_ISL_822179, EPI_ISL_822180, EPI_ISL_822181, EPI_ISL_822183, EPI_ISL_822184, EPI_ISL_822185, EPI_ISL_822186, EPI_ISL_822187, EPI_ISL_822188, EPI_ISL_822189, EPI_ISL_822190, EPI_ISL_822191, EPI_ISL_822192, EPI_ISL_822194, EPI_ISL_822195, EPI_ISL_822196, EPI_ISL_822197, EPI_ISL_822198, EPI_ISL_822199, EPI_ISL_822200, EPI_ISL_822202, EPI_ISL_822203, EPI_ISL_822205, EPI_ISL_822206, EPI_ISL_822207, EPI_ISL_822208, EPI_ISL_822209, EPI_ISL_822210, EPI_ISL_822211, EPI_ISL_822212, EPI_ISL_822213, EPI_ISL_822214, EPI_ISL_822215, EPI_ISL_822216, EPI_ISL_822217, EPI_ISL_822218, EPI_ISL_822219, EPI_ISL_822220, EPI_ISL_822221, EPI_ISL_822222, EPI_ISL_822223, EPI_ISL_822224, EPI_ISL_822225, EPI_ISL_822226, EPI_ISL_822227, EPI_ISL_822228, EPI_ISL_822229, EPI_ISL_822230, EPI_ISL_822231, EPI_ISL_822232, EPI_ISL_822233, EPI_ISL_822234, EPI_ISL_822235, EPI_ISL_822236, EPI_ISL_822237, EPI_ISL_822238, EPI_ISL_822239, EPI_ISL_822240, EPI_ISL_822241, EPI_ISL_822242, EPI_ISL_822243, EPI_ISL_822244, EPI_ISL_822245, EPI_ISL_822246, EPI_ISL_822247, EPI_ISL_822248, EPI_ISL_822249, EPI_ISL_822250, EPI_ISL_822251, EPI_ISL_822252, EPI_ISL_822254, EPI_ISL_822255, EPI_ISL_822257, EPI_ISL_822258, EPI_ISL_822259, EPI_ISL_822260, EPI_ISL_822261, EPI_ISL_822262, EPI_ISL_822263, EPI_ISL_822264, EPI_ISL_822265, EPI_ISL_822266, EPI_ISL_822267, EPI_ISL_822269, EPI_ISL_822270, EPI_ISL_822271, EPI_ISL_822272, EPI_ISL_822273, EPI_ISL_822274, EPI_ISL_822275, EPI_ISL_822276, EPI_ISL_822277, EPI_ISL_822278, EPI_ISL_822279, EPI_ISL_822280, EPI_ISL_822281, EPI_ISL_822282, EPI_ISL_822283, EPI_ISL_822284, EPI_ISL_822285, EPI_ISL_822286, EPI_ISL_822287, EPI_ISL_822288, EPI_ISL_822289, EPI_ISL_822290, EPI_ISL_822291                                                                                                                                                                                                                                                                                                                                                                                                                                                                                                                                                                                                                                                                                                                                                                                                                                                                                                                                                                                                                                                                                                                                                                                                                                                                                                                                                                                                                 | see above | Lighthouse Lab in Alderley Park                                         | Wellcome Sanger Institute for the COVID-19 Genomics UK (COG-UK) Consortium | Jacquelyn Wynn, Mairead Hyland, The Lighthouse Lab in Alderley Park and Alex Alderton, Roberto Amato, Sonia Goncalves, Ewan Harrison, David K. Jackson, Ian Johnston, Dominic Kwiatkowski, Cordelia Langford, John Sillitoe on behalf of the Wellcome Sanger Institute COVID-19 Surveillance Team                                                                         |
| EPI_ISL_822292, EPI_ISL_822293                                                                                                                                                                                                                                                                                                                                                                                                                                                                                                                                                                                                                                                                                                                                                                                                                                                                                                                                                                                                                                                                                                                                                                                                                                                                                                                                                                                                                                                                                                                                                                                                                                                                                                                                                                                                                                                                                                                                                                                                                                                                                                                                                                                                                                                                                                                                                                                                                                                                                                                                                                                                                                                                                                                                                                                                                                                                                                                                                                                                                                                                                                                                                                                                                                                                                                                                                                                                                                                                                                                                                                                                                                                                                                                                                                                                                                                                                                                                                                                                                                                                                                                                                                                                                                                                                                                                                                                                                                                                                                                                                                                                                                                                                                                                                                                                                                                                                                                                                                                                                                                                                                                                                                                                                                                                                                                                                                                                                                                                                                                                                                                                                                                                                                                                                                                                                                                                                                                                 |           | Lighthouse Lab in Glasgow                                               | Wellcome Sanger Institute for the COVID-19 Genomics UK (COG-UK) Consortium | Harper VanSteenhouse, Yumi Kasai, David Gray, Carol Clugston, Anna Dominiczak and Alex Alderton, Roberto Amato, Sonia Goncalves, Ewan Harrison, David K. Jackson, Ian Johnston, Dominic Kwiatkowski, Cordelia Langford, John Sillitoe on behalf of the Wellcome Sanger Institute COVID-19 Surveillance Team                                                               |
| EPI_ISL_822294                                                                                                                                                                                                                                                                                                                                                                                                                                                                                                                                                                                                                                                                                                                                                                                                                                                                                                                                                                                                                                                                                                                                                                                                                                                                                                                                                                                                                                                                                                                                                                                                                                                                                                                                                                                                                                                                                                                                                                                                                                                                                                                                                                                                                                                                                                                                                                                                                                                                                                                                                                                                                                                                                                                                                                                                                                                                                                                                                                                                                                                                                                                                                                                                                                                                                                                                                                                                                                                                                                                                                                                                                                                                                                                                                                                                                                                                                                                                                                                                                                                                                                                                                                                                                                                                                                                                                                                                                                                                                                                                                                                                                                                                                                                                                                                                                                                                                                                                                                                                                                                                                                                                                                                                                                                                                                                                                                                                                                                                                                                                                                                                                                                                                                                                                                                                                                                                                                                                                 |           | Lighthouse Lab in Alderley Park                                         | Wellcome Sanger Institute for the COVID-19 Genomics UK (COG-UK) Consortium | Jacquelyn Wynn, Mairead Hyland, The Lighthouse Lab in Alderley Park and Alex Alderton, Roberto Amato, Sonia Goncalves, Ewan Harrison, David K. Jackson, Ian Johnston, Dominic Kwiatkowski, Cordelia Langford, John Sillitoe on behalf of the Wellcome Sanger Institute COVID-19 Surveillance Team                                                                         |
| EPI_ISL_822295, EPI_ISL_822296                                                                                                                                                                                                                                                                                                                                                                                                                                                                                                                                                                                                                                                                                                                                                                                                                                                                                                                                                                                                                                                                                                                                                                                                                                                                                                                                                                                                                                                                                                                                                                                                                                                                                                                                                                                                                                                                                                                                                                                                                                                                                                                                                                                                                                                                                                                                                                                                                                                                                                                                                                                                                                                                                                                                                                                                                                                                                                                                                                                                                                                                                                                                                                                                                                                                                                                                                                                                                                                                                                                                                                                                                                                                                                                                                                                                                                                                                                                                                                                                                                                                                                                                                                                                                                                                                                                                                                                                                                                                                                                                                                                                                                                                                                                                                                                                                                                                                                                                                                                                                                                                                                                                                                                                                                                                                                                                                                                                                                                                                                                                                                                                                                                                                                                                                                                                                                                                                                                                 |           | Lighthouse Lab in Glasgow                                               | Wellcome Sanger Institute for the COVID-19 Genomics UK (COG-UK) Consortium | Harper VanSteenhouse, Yumi Kasai, David Gray, Carol Clugston, Anna Dominiczak and Alex Alderton, Roberto Amato, Sonia Goncalves, Ewan Harrison, David K. Jackson, Ian Johnston, Dominic Kwiatkowski, Cordelia Langford, John Sillitoe on behalf of the Wellcome Sanger Institute COVID-19 Surveillance Team                                                               |
| EPI_ISL_822297, EPI_ISL_822298                                                                                                                                                                                                                                                                                                                                                                                                                                                                                                                                                                                                                                                                                                                                                                                                                                                                                                                                                                                                                                                                                                                                                                                                                                                                                                                                                                                                                                                                                                                                                                                                                                                                                                                                                                                                                                                                                                                                                                                                                                                                                                                                                                                                                                                                                                                                                                                                                                                                                                                                                                                                                                                                                                                                                                                                                                                                                                                                                                                                                                                                                                                                                                                                                                                                                                                                                                                                                                                                                                                                                                                                                                                                                                                                                                                                                                                                                                                                                                                                                                                                                                                                                                                                                                                                                                                                                                                                                                                                                                                                                                                                                                                                                                                                                                                                                                                                                                                                                                                                                                                                                                                                                                                                                                                                                                                                                                                                                                                                                                                                                                                                                                                                                                                                                                                                                                                                                                                                 |           | Lighthouse Lab in Alderley Park                                         | Wellcome Sanger Institute for the COVID-19 Genomics UK (COG-UK) Consortium | Jacquelyn Wynn, Mairead Hyland, The Lighthouse Lab in Alderley Park and Alex Alderton, Roberto Amato, Sonia Goncalves, Ewan Harrison, David K. Jackson, Ian Johnston, Dominic Kwiatkowski, Cordelia Langford, John Sillitoe on behalf of the Wellcome Sanger Institute COVID-19 Surveillance Team                                                                         |
| EPI_ISL_822302                                                                                                                                                                                                                                                                                                                                                                                                                                                                                                                                                                                                                                                                                                                                                                                                                                                                                                                                                                                                                                                                                                                                                                                                                                                                                                                                                                                                                                                                                                                                                                                                                                                                                                                                                                                                                                                                                                                                                                                                                                                                                                                                                                                                                                                                                                                                                                                                                                                                                                                                                                                                                                                                                                                                                                                                                                                                                                                                                                                                                                                                                                                                                                                                                                                                                                                                                                                                                                                                                                                                                                                                                                                                                                                                                                                                                                                                                                                                                                                                                                                                                                                                                                                                                                                                                                                                                                                                                                                                                                                                                                                                                                                                                                                                                                                                                                                                                                                                                                                                                                                                                                                                                                                                                                                                                                                                                                                                                                                                                                                                                                                                                                                                                                                                                                                                                                                                                                                                                 |           | Lighthouse Lab in Glasgow                                               | Wellcome Sanger Institute for the COVID-19 Genomics UK (COG-UK) Consortium | Harper VanSteenhouse, Yumi Kasai, David Gray, Carol Clugston, Anna Dominiczak and Alex Alderton, Roberto Amato, Sonia Goncalves, Ewan Harrison, David K. Jackson, Ian Johnston, Dominic Kwiatkowski, Cordelia Langford, John Sillitoe on behalf of the Wellcome Sanger Institute COVID-19 Surveillance Team                                                               |
| EPI_ISL_822303                                                                                                                                                                                                                                                                                                                                                                                                                                                                                                                                                                                                                                                                                                                                                                                                                                                                                                                                                                                                                                                                                                                                                                                                                                                                                                                                                                                                                                                                                                                                                                                                                                                                                                                                                                                                                                                                                                                                                                                                                                                                                                                                                                                                                                                                                                                                                                                                                                                                                                                                                                                                                                                                                                                                                                                                                                                                                                                                                                                                                                                                                                                                                                                                                                                                                                                                                                                                                                                                                                                                                                                                                                                                                                                                                                                                                                                                                                                                                                                                                                                                                                                                                                                                                                                                                                                                                                                                                                                                                                                                                                                                                                                                                                                                                                                                                                                                                                                                                                                                                                                                                                                                                                                                                                                                                                                                                                                                                                                                                                                                                                                                                                                                                                                                                                                                                                                                                                                                                 |           | Lighthouse Lab in Alderley Park                                         | Wellcome Sanger Institute for the COVID-19 Genomics UK (COG-UK) Consortium | Jacquelyn Wynn, Mairead Hyland, The Lighthouse Lab in Alderley Park and Alex Alderton, Roberto Amato, Sonia Goncalves, Ewan Harrison, David K. Jackson, Ian Johnston, Dominic Kwiatkowski, Cordelia Langford, John Sillitoe on behalf of the Wellcome Sanger Institute COVID-19 Surveillance Team                                                                         |
| EPI_ISL_822304                                                                                                                                                                                                                                                                                                                                                                                                                                                                                                                                                                                                                                                                                                                                                                                                                                                                                                                                                                                                                                                                                                                                                                                                                                                                                                                                                                                                                                                                                                                                                                                                                                                                                                                                                                                                                                                                                                                                                                                                                                                                                                                                                                                                                                                                                                                                                                                                                                                                                                                                                                                                                                                                                                                                                                                                                                                                                                                                                                                                                                                                                                                                                                                                                                                                                                                                                                                                                                                                                                                                                                                                                                                                                                                                                                                                                                                                                                                                                                                                                                                                                                                                                                                                                                                                                                                                                                                                                                                                                                                                                                                                                                                                                                                                                                                                                                                                                                                                                                                                                                                                                                                                                                                                                                                                                                                                                                                                                                                                                                                                                                                                                                                                                                                                                                                                                                                                                                                                                 |           | Lighthouse Lab in Glasgow                                               | Wellcome Sanger Institute for the COVID-19 Genomics UK (COG-UK) Consortium | Harper VanSteenhouse, Yumi Kasai, David Gray, Carol Clugston, Anna Dominiczak and Alex Alderton, Roberto Amato, Sonia Goncalves, Ewan Harrison, David K. Jackson, Ian Johnston, Dominic Kwiatkowski, Cordelia Langford, John Sillitoe on behalf of the Wellcome Sanger Institute COVID-19 Surveillance Team                                                               |
| EPI_ISL_822612, EPI_ISL_822613, EPI_ISL_822614, EPI_ISL_822615, EPI_ISL_822616, EPI_ISL_822617, EPI_ISL_822618, EPI_ISL_822619, EPI_ISL_822620, EPI_ISL_822621, EPI_ISL_822622, EPI_ISL_822623, EPI_ISL_822624, EPI_ISL_822625, EPI_ISL_822626, EPI_ISL_822627, EPI_ISL_822628, EPI_ISL_822629, EPI_ISL_822630, EPI_ISL_822631, EPI_ISL_822632, EPI_ISL_822633, EPI_ISL_822634, EPI_ISL_822635, EPI_ISL_822636, EPI_ISL_822637, EPI_ISL_822638, EPI_ISL_822639, EPI_ISL_822640, EPI_ISL_822641, EPI_ISL_822642, EPI_ISL_822643, EPI_ISL_822644, EPI_ISL_822645, EPI_ISL_822646, EPI_ISL_822647, EPI_ISL_822648, EPI_ISL_822649, EPI_ISL_822650, EPI_ISL_822651, EPI_ISL_822652, EPI_ISL_822653, EPI_ISL_822654, EPI_ISL_822655, EPI_ISL_822656, EPI_ISL_822657, EPI_ISL_822658, EPI_ISL_822659, EPI_ISL_822660, EPI_ISL_822661, EPI_ISL_822662, EPI_ISL_822663, EPI_ISL_822664, EPI_ISL_822665, EPI_ISL_822666, EPI_ISL_822667, EPI_ISL_822668, EPI_ISL_822669, EPI_ISL_822670, EPI_ISL_822671, EPI_ISL_822672, EPI_ISL_822673, EPI_ISL_822674, EPI_ISL_822675, EPI_ISL_822676, EPI_ISL_822677, EPI_ISL_822678, EPI_ISL_822679, EPI_ISL_822680, EPI_ISL_822681, EPI_ISL_822682, EPI_ISL_822683, EPI_ISL_822684, EPI_ISL_822685, EPI_ISL_822686, EPI_ISL_822687, EPI_ISL_822688, EPI_ISL_822689, EPI_ISL_822690, EPI_ISL_822691, EPI_ISL_822692, EPI_ISL_822693, EPI_ISL_822694, EPI_ISL_822695, EPI_ISL_822696, EPI_ISL_822697, EPI_ISL_822698, EPI_ISL_822699, EPI_ISL_822700, EPI_ISL_822701, EPI_ISL_822702, EPI_ISL_822703, EPI_ISL_822704, EPI_ISL_822705, EPI_ISL_822706, EPI_ISL_822707, EPI_ISL_822708, EPI_ISL_822709, EPI_ISL_822710, EPI_ISL_822711, EPI_ISL_822712, EPI_ISL_822713, EPI_ISL_822714, EPI_ISL_822715, EPI_ISL_822716, EPI_ISL_822717, EPI_ISL_822718, EPI_ISL_822719, EPI_ISL_822720, EPI_ISL_822721, EPI_ISL_822722, EPI_ISL_822723, EPI_ISL_822724, EPI_ISL_822725, EPI_ISL_822726, EPI_ISL_822727, EPI_ISL_822728, EPI_ISL_822729, EPI_ISL_822730, EPI_ISL_822731, EPI_ISL_822732, EPI_ISL_822733, EPI_ISL_822734, EPI_ISL_822735, EPI_ISL_822736, EPI_ISL_822737, EPI_ISL_822738, EPI_ISL_822739, EPI_ISL_822740, EPI_ISL_822741, EPI_ISL_822742, EPI_ISL_822743, EPI_ISL_822744, EPI_ISL_822745, EPI_ISL_822746, EPI_ISL_822747, EPI_ISL_822748, EPI_ISL_822749, EPI_ISL_822750, EPI_ISL_822751, EPI_ISL_822752, EPI_ISL_822753, EPI_ISL_822754, EPI_ISL_822755, EPI_ISL_822756, EPI_ISL_822757, EPI_ISL_822758, EPI_ISL_822759, EPI_ISL_822760, EPI_ISL_822761, EPI_ISL_822762, EPI_ISL_822763, EPI_ISL_822764, EPI_ISL_822765, EPI_ISL_822766, EPI_ISL_822767, EPI_ISL_822768, EPI_ISL_822769, EPI_ISL_822770, EPI_ISL_822771, EPI_ISL_822772, EPI_ISL_822773, EPI_ISL_822774, EPI_ISL_822775, EPI_ISL_822776, EPI_ISL_822777, EPI_ISL_822778, EPI_ISL_822779, EPI_ISL_822780, EPI_ISL_822781, EPI_ISL_822782, EPI_ISL_822783, EPI_ISL_822784, EPI_ISL_822785, EPI_ISL_822786, EPI_ISL_822787, EPI_ISL_822788, EPI_ISL_822789, EPI_ISL_822790, EPI_ISL_822791, EPI_ISL_822792, EPI_ISL_822793, EPI_ISL_822794, EPI_ISL_822795, EPI_ISL_822796, EPI_ISL_822797, EPI_ISL_822798, EPI_ISL_822799, EPI_ISL_822800, EPI_ISL_822801, EPI_ISL_822802, EPI_ISL_822803, EPI_ISL_822804, EPI_ISL_822805, EPI_ISL_822806, EPI_ISL_822807, EPI_ISL_822808, EPI_ISL_822809, EPI_ISL_822810, EPI_ISL_822811, EPI_ISL_822812, EPI_ISL_822813, EPI_ISL_822814, EPI_ISL_822815, EPI_ISL_822816, EPI_ISL_822817, EPI_ISL_822818, EPI_ISL_822819, EPI_ISL_822820, EPI_ISL_822821, EPI_ISL_822822, EPI_ISL_822823, EPI_ISL_822824, EPI_ISL_822825, EPI_ISL_822826, EPI_ISL_822827, EPI_ISL_822828, EPI_ISL_822829, EPI_ISL_822830, EPI_ISL_822831, EPI_ISL_822832, EPI_ISL_822833, EPI_ISL_822834, EPI_ISL_822835, EPI_ISL_822836, EPI_ISL_822837, EPI_ISL_822838, EPI_ISL_822839, EPI_ISL_822840, EPI_ISL_822841, EPI_ISL_822842, EPI_ISL_822843, EPI_ISL_822844, EPI_ISL_822845, EPI_ISL_822846, EPI_ISL_822847, EPI_ISL_822848, EPI_ISL_822849, EPI_ISL_822850, EPI_ISL_822851, EPI_ISL_822852, EPI_ISL_822853, EPI_ISL_822854, EPI_ISL_822855, EPI_ISL_822856, EPI_ISL_822857, EPI_ISL_822858, EPI_ISL_822859, EPI_ISL_822860, EPI_ISL_822861, EPI_ISL_822862, EPI_ISL_822863, EPI_ISL_822864, EPI_ISL_822865, EPI_ISL_822866, EPI_ISL_822867, EPI_ISL_822868, EPI_ISL_822869, EPI_ISL_822870, EPI_ISL_822871, EPI_ISL_822872, EPI_ISL_822873, EPI_ISL_822874, EPI_ISL_822875, EPI_ISL_822876, EPI_ISL_822877, EPI_ISL_822878, EPI_ISL_822879, EPI_ISL_822880, EPI_ISL_822881, EPI_ISL_822882, EPI_ISL_822883, EPI_ISL_822884, EPI_ISL_822885, EPI_ISL_822886, EPI_ISL_822887, EPI_ISL_822888, EPI_ISL_822889, EPI_ISL_822890, EPI_ISL_822891, EPI_ISL_822892, EPI_ISL_822893, EPI_ISL_822894, EPI_ISL_822895, EPI_ISL_822896, EPI_ISL_822897, EPI_ISL_822898, EPI_ISL_822899, EPI_ISL_822900, EPI_ISL_822901, EPI_ISL_822902, EPI_ISL_822903, EPI_ISL_822904, EPI_ISL_822905, EPI_ISL_822906, EPI_ISL_822907, EPI_ISL_822908, EPI_ISL_822909, EPI_ISL_822910, EPI_ISL_822911, EPI_ISL_822912, EPI_ISL_822913, EPI_ISL_822914, EPI_ISL_822915, EPI_ISL_822916, EPI_ISL_822917, EPI_ISL_822918, EPI_ISL_822919, EPI_ISL_822920, EPI_ISL_822921, EPI_ISL_822922, EPI_ISL_822923, EPI_ISL_822924, EPI_ISL_822925, EPI_ISL_822926, EPI_ISL_822927, EPI_ISL_822928, EPI_ISL_822929, EPI_ISL_822930, EPI_ISL_822931, EPI_ISL_822932, EPI_ISL_822933, EPI_ISL_822934, EPI_ISL_822935, EPI_ISL_822936, EPI_ISL_822937, EPI_ISL_822938, EPI_ISL_822939, EPI_ISL_822940, EPI_ISL_822941, EPI_ISL_822942, EPI_ISL_822943, EPI_ISL_822944, EPI_ISL_822945, EPI_ISL_822946, EPI_ISL_822947, EPI_ISL_822948, EPI_ISL_822949, EPI_ISL_822950, EPI_ISL_822951, EPI_ISL_822952, EPI_ISL_822953, EPI_ISL_822954, EPI_ISL_822955, EPI_ISL_822956, EPI_ISL_822957, EPI_ISL_822958, EPI_ISL_822959, EPI_ISL_822960, EPI_ISL_822961, EPI_ISL_822962, EPI_ISL_822963, EPI_ISL_822964, EPI_ISL_822965, EPI_ISL_822966, EPI_ISL_822968, EPI_ISL_822969, EPI_ISL_822970 | see above | Wales Specialist Virology Centre Sequencing lab: Pathogen Genomics Unit | COVID-19 Genomics UK (COG-UK) Consortium                                   | Catherine Moore, Johnathan Evans, Laura Gifford, Malorie Perry, Simon Cottrell, Angela Marchbank, Alec Birchley, Alexander Adams, Amy Gaskin, Bree Gatica-Wilcox, Jason Coombes, Joel Southgate, Lauren Gilbert, Lee Graham, Nicole Pacchiaroni, Sara Kumziene-Summerhayes, Sarah Taylor, Sophie Jones, Sarah Rey, Matthew Bull, Joanne Watkins, Sally Corden, Tom Connor |
| EPI_ISL_825499, EPI_ISL_825500, EPI_ISL_825504, EPI_ISL_825534, EPI_ISL_825535, EPI_ISL_825536, EPI_ISL_825537, EPI_ISL_825538, EPI_ISL_825539, EPI_ISL_8255                                                                                                                                                                                                                                                                                                                                                                                                                                                                                                                                                                                                                                                                                                                                                                                                                                                                                                                                                                                                                                                                                                                                                                                                                                                                                                                                                                                                                                                                                                                                                                                                                                                                                                                                                                                                                                                                                                                                                                                                                                                                                                                                                                                                                                                                                                                                                                                                                                                                                                                                                                                                                                                                                                                                                                                                                                                                                                                                                                                                                                                                                                                                                                                                                                                                                                                                                                                                                                                                                                                                                                                                                                                                                                                                                                                                                                                                                                                                                                                                                                                                                                                                                                                                                                                                                                                                                                                                                                                                                                                                                                                                                                                                                                                                                                                                                                                                                                                                                                                                                                                                                                                                                                                                                                                                                                                                                                                                                                                                                                                                                                                                                                                                                                                                                                                                   |           |                                                                         |                                                                            |                                                                                                                                                                                                                                                                                                                                                                           |

|                                                                                                                                                                                                                                                                                                                                                                                                                                                                                                                                                                                                                                                                                                                                                                                                                                                                                                                                                                                                                                                                                                                                                                                                                                                                                                                                                                                                                                                                                                                                                                                                                                                                                                                                                                                                                                                                                                                                                                                                                                                                                                                                                                                                                                                                                                                                                                                                                                                                                                                                                                                                                                                                                                                                                                                                                                                                                                                                                                                                                                                                                                                                                                                                                                                                                                                                                                                                                                                                                                                                                                                                                                                                                                                                                                                                                                                                                                                                                                                                                                                                                                                                                                                                                                                                                                                |                                                                                                                                                                                                                                                                                                                                                                                                                                                                                                                                                                                                                                                                                                                                                                                                                                                                                                                |                                                                                                                                                                                                 |                                                                            |                                                                                                                                                                                                                                                                                                                                                                                                                                                                                                                                                                                                                                                                                          |
|----------------------------------------------------------------------------------------------------------------------------------------------------------------------------------------------------------------------------------------------------------------------------------------------------------------------------------------------------------------------------------------------------------------------------------------------------------------------------------------------------------------------------------------------------------------------------------------------------------------------------------------------------------------------------------------------------------------------------------------------------------------------------------------------------------------------------------------------------------------------------------------------------------------------------------------------------------------------------------------------------------------------------------------------------------------------------------------------------------------------------------------------------------------------------------------------------------------------------------------------------------------------------------------------------------------------------------------------------------------------------------------------------------------------------------------------------------------------------------------------------------------------------------------------------------------------------------------------------------------------------------------------------------------------------------------------------------------------------------------------------------------------------------------------------------------------------------------------------------------------------------------------------------------------------------------------------------------------------------------------------------------------------------------------------------------------------------------------------------------------------------------------------------------------------------------------------------------------------------------------------------------------------------------------------------------------------------------------------------------------------------------------------------------------------------------------------------------------------------------------------------------------------------------------------------------------------------------------------------------------------------------------------------------------------------------------------------------------------------------------------------------------------------------------------------------------------------------------------------------------------------------------------------------------------------------------------------------------------------------------------------------------------------------------------------------------------------------------------------------------------------------------------------------------------------------------------------------------------------------------------------------------------------------------------------------------------------------------------------------------------------------------------------------------------------------------------------------------------------------------------------------------------------------------------------------------------------------------------------------------------------------------------------------------------------------------------------------------------------------------------------------------------------------------------------------------------------------------------------------------------------------------------------------------------------------------------------------------------------------------------------------------------------------------------------------------------------------------------------------------------------------------------------------------------------------------------------------------------------------------------------------------------------------------------------------|----------------------------------------------------------------------------------------------------------------------------------------------------------------------------------------------------------------------------------------------------------------------------------------------------------------------------------------------------------------------------------------------------------------------------------------------------------------------------------------------------------------------------------------------------------------------------------------------------------------------------------------------------------------------------------------------------------------------------------------------------------------------------------------------------------------------------------------------------------------------------------------------------------------|-------------------------------------------------------------------------------------------------------------------------------------------------------------------------------------------------|----------------------------------------------------------------------------|------------------------------------------------------------------------------------------------------------------------------------------------------------------------------------------------------------------------------------------------------------------------------------------------------------------------------------------------------------------------------------------------------------------------------------------------------------------------------------------------------------------------------------------------------------------------------------------------------------------------------------------------------------------------------------------|
| EPI_ISL_826476, EPI_ISL_834141, EPI_ISL_834211, EPI_ISL_834212, EPI_ISL_834223, EPI_ISL_834226, EPI_ISL_834228, EPI_ISL_834230, EPI_ISL_834231, EPI_ISL_834233, EPI_ISL_834235, EPI_ISL_834236, EPI_ISL_834237, EPI_ISL_834246, EPI_ISL_834248, EPI_ISL_834250, EPI_ISL_834256, EPI_ISL_834263, EPI_ISL_834264, EPI_ISL_834271, EPI_ISL_834274, EPI_ISL_834276, EPI_ISL_834280, EPI_ISL_834283, EPI_ISL_834288, EPI_ISL_834290, EPI_ISL_834293, EPI_ISL_834298, EPI_ISL_834299, EPI_ISL_834312, EPI_ISL_834313, EPI_ISL_834316, EPI_ISL_834317, EPI_ISL_834344, EPI_ISL_834352, EPI_ISL_834353, EPI_ISL_834360, EPI_ISL_834368, EPI_ISL_834370, EPI_ISL_834373, EPI_ISL_834376, EPI_ISL_834377, EPI_ISL_834378, EPI_ISL_834380, EPI_ISL_834381, EPI_ISL_834382, EPI_ISL_834388, EPI_ISL_834400, EPI_ISL_834402, EPI_ISL_834404, EPI_ISL_834407, EPI_ISL_834409, EPI_ISL_834417, EPI_ISL_834423, EPI_ISL_834427, EPI_ISL_834430, EPI_ISL_834433, EPI_ISL_834436, EPI_ISL_834440, EPI_ISL_834446, EPI_ISL_834445, EPI_ISL_834448, EPI_ISL_834449, EPI_ISL_834456, EPI_ISL_834459, EPI_ISL_834460, EPI_ISL_834466, EPI_ISL_834467, EPI_ISL_834468, EPI_ISL_834484, EPI_ISL_834485, EPI_ISL_834486, EPI_ISL_834488, EPI_ISL_834492, EPI_ISL_834494, EPI_ISL_834497, EPI_ISL_834499, EPI_ISL_834500, EPI_ISL_834503, EPI_ISL_834507, EPI_ISL_834511, EPI_ISL_834517, EPI_ISL_834519, EPI_ISL_834524, EPI_ISL_834529, EPI_ISL_834541, EPI_ISL_834545                                                                                                                                                                                                                                                                                                                                                                                                                                                                                                                                                                                                                                                                                                                                                                                                                                                                                                                                                                                                                                                                                                                                                                                                                                                                                                                                                                                                                                                                                                                                                                                                                                                                                                                                                                                                                                                                                                                                                                                                                                                                                                                                                                                                                                                                                                                                                                                                                                                                                                                                                                                                                                                                                                                                                                                                                                                                 | see above                                                                                                                                                                                                                                                                                                                                                                                                                                                                                                                                                                                                                                                                                                                                                                                                                                                                                                      | Lighthouse Lab in Alderley Park                                                                                                                                                                 | Wellcome Sanger Institute for the COVID-19 Genomics UK (COG-UK) Consortium | Jacquelyn Wynn, Mairead Hyland, The Lighthouse Lab in Alderley Park and Alex Alderton, Roberto Amato, Sonia Goncalves, Ewan Harrison, David K. Jackson, Ian Johnston, Dominic Kwiatkowski, Cordelia Langford, John Sillitoe on behalf of the Wellcome Sanger Institute COVID-19 Surveillance Team                                                                                                                                                                                                                                                                                                                                                                                        |
| EPI_ISL_834578                                                                                                                                                                                                                                                                                                                                                                                                                                                                                                                                                                                                                                                                                                                                                                                                                                                                                                                                                                                                                                                                                                                                                                                                                                                                                                                                                                                                                                                                                                                                                                                                                                                                                                                                                                                                                                                                                                                                                                                                                                                                                                                                                                                                                                                                                                                                                                                                                                                                                                                                                                                                                                                                                                                                                                                                                                                                                                                                                                                                                                                                                                                                                                                                                                                                                                                                                                                                                                                                                                                                                                                                                                                                                                                                                                                                                                                                                                                                                                                                                                                                                                                                                                                                                                                                                                 | EPI_ISL_834578                                                                                                                                                                                                                                                                                                                                                                                                                                                                                                                                                                                                                                                                                                                                                                                                                                                                                                 | Lighthouse Lab in Glasgow                                                                                                                                                                       | Wellcome Sanger Institute for the COVID-19 Genomics UK (COG-UK) Consortium | Harper VanSteenhouse, Yumi Kasai, David Gray, Carol Clugston, Anna Dominiczak and Alex Alderton, Roberto Amato, Sonia Goncalves, Ewan Harrison, David K. Jackson, Ian Johnston, Dominic Kwiatkowski, Cordelia Langford, John Sillitoe on behalf of the Wellcome Sanger Institute COVID-19 Surveillance Team                                                                                                                                                                                                                                                                                                                                                                              |
| EPI_ISL_834804, EPI_ISL_834814, EPI_ISL_834823, EPI_ISL_834825, EPI_ISL_834826, EPI_ISL_834833, EPI_ISL_834834, EPI_ISL_834837, EPI_ISL_834848, EPI_ISL_834865, EPI_ISL_834867, EPI_ISL_834870, EPI_ISL_834874, EPI_ISL_834875, EPI_ISL_834886, EPI_ISL_834889, EPI_ISL_834901, EPI_ISL_834903, EPI_ISL_834909, EPI_ISL_834910, EPI_ISL_834920, EPI_ISL_834921, EPI_ISL_834925, EPI_ISL_834931, EPI_ISL_834933, EPI_ISL_834937, EPI_ISL_834947, EPI_ISL_834949, EPI_ISL_834959, EPI_ISL_834963, EPI_ISL_834972, EPI_ISL_834979, EPI_ISL_834981, EPI_ISL_834982, EPI_ISL_834983, EPI_ISL_834989, EPI_ISL_834991, EPI_ISL_835001, EPI_ISL_835004, EPI_ISL_835008, EPI_ISL_835017, EPI_ISL_835031, EPI_ISL_835038, EPI_ISL_835043, EPI_ISL_835047, EPI_ISL_835047, EPI_ISL_835055, EPI_ISL_835058, EPI_ISL_835060, EPI_ISL_835067, EPI_ISL_835091, EPI_ISL_835094, EPI_ISL_835114, EPI_ISL_835115, EPI_ISL_835127, EPI_ISL_835130, EPI_ISL_835132, EPI_ISL_835140, EPI_ISL_835146, EPI_ISL_835148, EPI_ISL_835149, EPI_ISL_835152, EPI_ISL_835153, EPI_ISL_835154, EPI_ISL_835155, EPI_ISL_835156, EPI_ISL_835157, EPI_ISL_835158, EPI_ISL_835159, EPI_ISL_835160, EPI_ISL_835161, EPI_ISL_835162, EPI_ISL_835163, EPI_ISL_835164, EPI_ISL_835165, EPI_ISL_835166, EPI_ISL_835167, EPI_ISL_835168, EPI_ISL_835169, EPI_ISL_835170, EPI_ISL_835171, EPI_ISL_835172, EPI_ISL_835173, EPI_ISL_835174, EPI_ISL_835175, EPI_ISL_835176, EPI_ISL_835177, EPI_ISL_835178, EPI_ISL_835179, EPI_ISL_835180, EPI_ISL_835181, EPI_ISL_835182, EPI_ISL_835183, EPI_ISL_835184, EPI_ISL_835185, EPI_ISL_835186, EPI_ISL_835187, EPI_ISL_835188, EPI_ISL_835189, EPI_ISL_835190, EPI_ISL_835191, EPI_ISL_835192, EPI_ISL_835193, EPI_ISL_835194, EPI_ISL_835195, EPI_ISL_835196, EPI_ISL_835197, EPI_ISL_835198, EPI_ISL_835199, EPI_ISL_835200, EPI_ISL_835201, EPI_ISL_835202, EPI_ISL_835203, EPI_ISL_835204, EPI_ISL_835205, EPI_ISL_835206, EPI_ISL_835207, EPI_ISL_835208, EPI_ISL_835209, EPI_ISL_835210, EPI_ISL_835211, EPI_ISL_835212, EPI_ISL_835213, EPI_ISL_835214, EPI_ISL_835215, EPI_ISL_835216, EPI_ISL_835217, EPI_ISL_835218, EPI_ISL_835219, EPI_ISL_835220, EPI_ISL_835221, EPI_ISL_835222, EPI_ISL_835223, EPI_ISL_835224, EPI_ISL_835225, EPI_ISL_835226, EPI_ISL_835227, EPI_ISL_835228, EPI_ISL_835229, EPI_ISL_835230, EPI_ISL_835231, EPI_ISL_835232, EPI_ISL_835233, EPI_ISL_835234, EPI_ISL_835235, EPI_ISL_835236, EPI_ISL_835237, EPI_ISL_835238, EPI_ISL_835239                                                                                                                                                                                                                                                                                                                                                                                                                                                                                                                                                                                                                                                                                                                                                                                                                                                                                                                                                                                                                                                                                                                                                                                                                                                                                                                                                                                                                                                                                                                                                                                                                                                                                                                                                                                                                                 | see above                                                                                                                                                                                                                                                                                                                                                                                                                                                                                                                                                                                                                                                                                                                                                                                                                                                                                                      | Lighthouse Lab in Alderley Park                                                                                                                                                                 | Wellcome Sanger Institute for the COVID-19 Genomics UK (COG-UK) Consortium | Jacquelyn Wynn, Mairead Hyland, The Lighthouse Lab in Alderley Park and Alex Alderton, Roberto Amato, Sonia Goncalves, Ewan Harrison, David K. Jackson, Ian Johnston, Dominic Kwiatkowski, Cordelia Langford, John Sillitoe on behalf of the Wellcome Sanger Institute COVID-19 Surveillance Team                                                                                                                                                                                                                                                                                                                                                                                        |
| EPI_ISL_837041, EPI_ISL_837042, EPI_ISL_837043, EPI_ISL_837044, EPI_ISL_837045, EPI_ISL_837046, EPI_ISL_837047, EPI_ISL_837048, EPI_ISL_837049, EPI_ISL_837050, EPI_ISL_837051, EPI_ISL_837052, EPI_ISL_837053, EPI_ISL_837054, EPI_ISL_837055, EPI_ISL_837056, EPI_ISL_837057, EPI_ISL_837058, EPI_ISL_837059, EPI_ISL_837060, EPI_ISL_837061, EPI_ISL_837062, EPI_ISL_837063, EPI_ISL_837064, EPI_ISL_837065, EPI_ISL_837066, EPI_ISL_837067, EPI_ISL_837068, EPI_ISL_837069, EPI_ISL_837070, EPI_ISL_837071, EPI_ISL_837072, EPI_ISL_837073, EPI_ISL_837074, EPI_ISL_837075, EPI_ISL_837076, EPI_ISL_837077, EPI_ISL_837078, EPI_ISL_837079, EPI_ISL_837080, EPI_ISL_837081, EPI_ISL_837082, EPI_ISL_837083, EPI_ISL_837084, EPI_ISL_837085, EPI_ISL_837086, EPI_ISL_837087, EPI_ISL_837088, EPI_ISL_837089, EPI_ISL_837090, EPI_ISL_837091, EPI_ISL_837092, EPI_ISL_837093, EPI_ISL_837094, EPI_ISL_837095, EPI_ISL_837096, EPI_ISL_837097, EPI_ISL_837098, EPI_ISL_837099, EPI_ISL_837100, EPI_ISL_837101, EPI_ISL_837102, EPI_ISL_837103, EPI_ISL_837104, EPI_ISL_837105, EPI_ISL_837106, EPI_ISL_837107, EPI_ISL_837108, EPI_ISL_837109, EPI_ISL_837110, EPI_ISL_837111, EPI_ISL_837112, EPI_ISL_837113, EPI_ISL_837114, EPI_ISL_837115, EPI_ISL_837116, EPI_ISL_837117, EPI_ISL_837118, EPI_ISL_837119, EPI_ISL_837120, EPI_ISL_837121, EPI_ISL_837122, EPI_ISL_837123, EPI_ISL_837124, EPI_ISL_837125, EPI_ISL_837126, EPI_ISL_837127, EPI_ISL_837128, EPI_ISL_837129, EPI_ISL_837130, EPI_ISL_837131, EPI_ISL_837132, EPI_ISL_837133, EPI_ISL_837134, EPI_ISL_837135, EPI_ISL_837136, EPI_ISL_837137, EPI_ISL_837138, EPI_ISL_837139, EPI_ISL_837140, EPI_ISL_837141, EPI_ISL_837142, EPI_ISL_837143, EPI_ISL_837144, EPI_ISL_837145, EPI_ISL_837146, EPI_ISL_837147, EPI_ISL_837148, EPI_ISL_837149, EPI_ISL_837150, EPI_ISL_837151, EPI_ISL_837152, EPI_ISL_837153, EPI_ISL_837154, EPI_ISL_837155, EPI_ISL_837156, EPI_ISL_837157, EPI_ISL_837158, EPI_ISL_837159, EPI_ISL_837160, EPI_ISL_837161, EPI_ISL_837162, EPI_ISL_837163, EPI_ISL_837164, EPI_ISL_837165, EPI_ISL_837166, EPI_ISL_837167, EPI_ISL_837168, EPI_ISL_837169, EPI_ISL_837170, EPI_ISL_837171, EPI_ISL_837172, EPI_ISL_837173, EPI_ISL_837174, EPI_ISL_837175, EPI_ISL_837176, EPI_ISL_837177, EPI_ISL_837178, EPI_ISL_837179, EPI_ISL_837180, EPI_ISL_837181, EPI_ISL_837182, EPI_ISL_837183, EPI_ISL_837184, EPI_ISL_837185, EPI_ISL_837186, EPI_ISL_837187, EPI_ISL_837188, EPI_ISL_837189, EPI_ISL_837190, EPI_ISL_837191, EPI_ISL_837192, EPI_ISL_837193, EPI_ISL_837194, EPI_ISL_837195, EPI_ISL_837196, EPI_ISL_837197, EPI_ISL_837198, EPI_ISL_837199, EPI_ISL_837200, EPI_ISL_837201, EPI_ISL_837202, EPI_ISL_837203, EPI_ISL_837204, EPI_ISL_837205, EPI_ISL_837206, EPI_ISL_837207, EPI_ISL_837208, EPI_ISL_837209, EPI_ISL_837210, EPI_ISL_837211, EPI_ISL_837212, EPI_ISL_837213, EPI_ISL_837214, EPI_ISL_837215, EPI_ISL_837216, EPI_ISL_837217, EPI_ISL_837218, EPI_ISL_837219, EPI_ISL_837220, EPI_ISL_837221, EPI_ISL_837222, EPI_ISL_837223, EPI_ISL_837224, EPI_ISL_837225, EPI_ISL_837226, EPI_ISL_837227, EPI_ISL_837228, EPI_ISL_837229, EPI_ISL_837230, EPI_ISL_837231, EPI_ISL_837232, EPI_ISL_837233, EPI_ISL_837234, EPI_ISL_837235, EPI_ISL_837236, EPI_ISL_837237, EPI_ISL_837238, EPI_ISL_837239                                                                                                                                                                                                                                                                                                                                                                                                                                                                                                                                                                                                                                                                                                                                                                                                                                                                                                                                                                                                 | see above                                                                                                                                                                                                                                                                                                                                                                                                                                                                                                                                                                                                                                                                                                                                                                                                                                                                                                      | Respiratory Virus Unit, National Infection Service, Public Health England                                                                                                                       | COVID-19 Genomics UK (COG-UK) Consortium                                   | PHE Covid Sequencing Team                                                                                                                                                                                                                                                                                                                                                                                                                                                                                                                                                                                                                                                                |
| EPI_ISL_837849, EPI_ISL_837851, EPI_ISL_837853, EPI_ISL_837855, EPI_ISL_837858, EPI_ISL_837860, EPI_ISL_837862, EPI_ISL_837864, EPI_ISL_837866, EPI_ISL_837867, EPI_ISL_837868, EPI_ISL_837870, EPI_ISL_837872, EPI_ISL_837873, EPI_ISL_837874, EPI_ISL_837875, EPI_ISL_837878, EPI_ISL_837880, EPI_ISL_837881, EPI_ISL_837883, EPI_ISL_837884, EPI_ISL_837885, EPI_ISL_837888, EPI_ISL_837889, EPI_ISL_837890, EPI_ISL_837891, EPI_ISL_837893, EPI_ISL_837894, EPI_ISL_837895, EPI_ISL_837897, EPI_ISL_837899, EPI_ISL_837900, EPI_ISL_837926, EPI_ISL_837928                                                                                                                                                                                                                                                                                                                                                                                                                                                                                                                                                                                                                                                                                                                                                                                                                                                                                                                                                                                                                                                                                                                                                                                                                                                                                                                                                                                                                                                                                                                                                                                                                                                                                                                                                                                                                                                                                                                                                                                                                                                                                                                                                                                                                                                                                                                                                                                                                                                                                                                                                                                                                                                                                                                                                                                                                                                                                                                                                                                                                                                                                                                                                                                                                                                                                                                                                                                                                                                                                                                                                                                                                                                                                                                                                 | see above                                                                                                                                                                                                                                                                                                                                                                                                                                                                                                                                                                                                                                                                                                                                                                                                                                                                                                      | Department of Pathology, University of Cambridge                                                                                                                                                | COVID-19 Genomics UK (COG-UK) Consortium                                   | Aminu S. Jahun, Yasmin Chaudhry, Grant Hall, Iliana Georgana, Myra Hosmillo, Martin D. Curran, Maite Pinckert, Surendra Parmar, Ian Goodfellow                                                                                                                                                                                                                                                                                                                                                                                                                                                                                                                                           |
| EPI_ISL_838192, EPI_ISL_838195                                                                                                                                                                                                                                                                                                                                                                                                                                                                                                                                                                                                                                                                                                                                                                                                                                                                                                                                                                                                                                                                                                                                                                                                                                                                                                                                                                                                                                                                                                                                                                                                                                                                                                                                                                                                                                                                                                                                                                                                                                                                                                                                                                                                                                                                                                                                                                                                                                                                                                                                                                                                                                                                                                                                                                                                                                                                                                                                                                                                                                                                                                                                                                                                                                                                                                                                                                                                                                                                                                                                                                                                                                                                                                                                                                                                                                                                                                                                                                                                                                                                                                                                                                                                                                                                                 | EPI_ISL_838192, EPI_ISL_838195                                                                                                                                                                                                                                                                                                                                                                                                                                                                                                                                                                                                                                                                                                                                                                                                                                                                                 | West of Scotland Specialist Virology Centre, NHSGGC / MRC-University of Glasgow Centre for Virus Research                                                                                       | COVID-19 Genomics UK (COG-UK) Consortium                                   | Ana da Silva Filipe, Natasha Johnson, Kathy Smollett, Daniel Mair, Stephen Carmichael, Alice Buras, Lily Tong, Jenna Nichols, Kyriaki Nomikou; Sarah McDonald; Richard Orton, Joseph Hughes, Sreenu Vattipally, David L Robertson; Alasdair MacLean, Rory Gunson; Sharif Shaaban, Matthew Holden; Rachel Blacow, Guy Mollett, Kathy Li, James Shepherd, Antonia Ho, Emma Thomson                                                                                                                                                                                                                                                                                                         |
| EPI_ISL_838268, EPI_ISL_838269, EPI_ISL_838270, EPI_ISL_838271, EPI_ISL_838273, EPI_ISL_838277, EPI_ISL_838278, EPI_ISL_838279                                                                                                                                                                                                                                                                                                                                                                                                                                                                                                                                                                                                                                                                                                                                                                                                                                                                                                                                                                                                                                                                                                                                                                                                                                                                                                                                                                                                                                                                                                                                                                                                                                                                                                                                                                                                                                                                                                                                                                                                                                                                                                                                                                                                                                                                                                                                                                                                                                                                                                                                                                                                                                                                                                                                                                                                                                                                                                                                                                                                                                                                                                                                                                                                                                                                                                                                                                                                                                                                                                                                                                                                                                                                                                                                                                                                                                                                                                                                                                                                                                                                                                                                                                                 | EPI_ISL_838268, EPI_ISL_838269, EPI_ISL_838270, EPI_ISL_838271, EPI_ISL_838273, EPI_ISL_838277, EPI_ISL_838278, EPI_ISL_838279                                                                                                                                                                                                                                                                                                                                                                                                                                                                                                                                                                                                                                                                                                                                                                                 | Virology Department, Royal Infirmary of Edinburgh, NHS Lothian / School of Biological Sciences, University of Edinburgh / Institute of Genetics and Molecular Medicine, University of Edinburgh | COVID-19 Genomics UK (COG-UK) Consortium                                   | McHugh M, Dewar R, Rooke S, Gallagher M, Balcaza C, O'Toole Á, Scher E, Hill V, McCrone JT, Colquhoun R, Yu X, Jackson B, Rambaut A, Williams TC, Templeton K                                                                                                                                                                                                                                                                                                                                                                                                                                                                                                                            |
| EPI_ISL_838330, EPI_ISL_838332, EPI_ISL_838333, EPI_ISL_838338                                                                                                                                                                                                                                                                                                                                                                                                                                                                                                                                                                                                                                                                                                                                                                                                                                                                                                                                                                                                                                                                                                                                                                                                                                                                                                                                                                                                                                                                                                                                                                                                                                                                                                                                                                                                                                                                                                                                                                                                                                                                                                                                                                                                                                                                                                                                                                                                                                                                                                                                                                                                                                                                                                                                                                                                                                                                                                                                                                                                                                                                                                                                                                                                                                                                                                                                                                                                                                                                                                                                                                                                                                                                                                                                                                                                                                                                                                                                                                                                                                                                                                                                                                                                                                                 | EPI_ISL_838330, EPI_ISL_838332, EPI_ISL_838333, EPI_ISL_838338                                                                                                                                                                                                                                                                                                                                                                                                                                                                                                                                                                                                                                                                                                                                                                                                                                                 | University of Exeter                                                                                                                                                                            | COVID-19 Genomics UK (COG-UK) Consortium                                   | Ben Temperton, Aaron Jeffries, Michelle Michelson, Joanna Warwick-Dugdale, Audrey Farbos, Robyn Manley, Stephen Michell, Jane Masoli                                                                                                                                                                                                                                                                                                                                                                                                                                                                                                                                                     |
| EPI_ISL_838580, EPI_ISL_838581, EPI_ISL_838582, EPI_ISL_838583, EPI_ISL_838584, EPI_ISL_838589, EPI_ISL_838590, EPI_ISL_838591, EPI_ISL_838594, EPI_ISL_838595, EPI_ISL_838596, EPI_ISL_838598, EPI_ISL_838601, EPI_ISL_838604, EPI_ISL_838606, EPI_ISL_838607, EPI_ISL_838608, EPI_ISL_838609, EPI_ISL_838610, EPI_ISL_838611, EPI_ISL_838612, EPI_ISL_838614, EPI_ISL_838615, EPI_ISL_838616, EPI_ISL_838618, EPI_ISL_838621, EPI_ISL_838622, EPI_ISL_838623, EPI_ISL_838624, EPI_ISL_838629, EPI_ISL_838630, EPI_ISL_838631, EPI_ISL_838632, EPI_ISL_838633, EPI_ISL_838634, EPI_ISL_838635, EPI_ISL_838636, EPI_ISL_838637, EPI_ISL_838639, EPI_ISL_838640, EPI_ISL_838641, EPI_ISL_838642, EPI_ISL_838643, EPI_ISL_838644, EPI_ISL_838647, EPI_ISL_838648, EPI_ISL_838649, EPI_ISL_838650, EPI_ISL_838651, EPI_ISL_838652, EPI_ISL_838653, EPI_ISL_838654, EPI_ISL_838656, EPI_ISL_838657, EPI_ISL_838658                                                                                                                                                                                                                                                                                                                                                                                                                                                                                                                                                                                                                                                                                                                                                                                                                                                                                                                                                                                                                                                                                                                                                                                                                                                                                                                                                                                                                                                                                                                                                                                                                                                                                                                                                                                                                                                                                                                                                                                                                                                                                                                                                                                                                                                                                                                                                                                                                                                                                                                                                                                                                                                                                                                                                                                                                                                                                                                                                                                                                                                                                                                                                                                                                                                                                                                                                                                                 | EPI_ISL_838580, EPI_ISL_838581, EPI_ISL_838582, EPI_ISL_838583, EPI_ISL_838584, EPI_ISL_838589, EPI_ISL_838590, EPI_ISL_838591, EPI_ISL_838594, EPI_ISL_838595, EPI_ISL_838596, EPI_ISL_838598, EPI_ISL_838601, EPI_ISL_838604, EPI_ISL_838606, EPI_ISL_838607, EPI_ISL_838608, EPI_ISL_838609, EPI_ISL_838610, EPI_ISL_838611, EPI_ISL_838612, EPI_ISL_838614, EPI_ISL_838615, EPI_ISL_838616, EPI_ISL_838618, EPI_ISL_838621, EPI_ISL_838622, EPI_ISL_838623, EPI_ISL_838624, EPI_ISL_838629, EPI_ISL_838630, EPI_ISL_838631, EPI_ISL_838632, EPI_ISL_838633, EPI_ISL_838634, EPI_ISL_838635, EPI_ISL_838636, EPI_ISL_838637, EPI_ISL_838639, EPI_ISL_838640, EPI_ISL_838641, EPI_ISL_838642, EPI_ISL_838643, EPI_ISL_838644, EPI_ISL_838647, EPI_ISL_838648, EPI_ISL_838649, EPI_ISL_838650, EPI_ISL_838651, EPI_ISL_838652, EPI_ISL_838653, EPI_ISL_838654, EPI_ISL_838656, EPI_ISL_838657, EPI_ISL_838658 | Liverpool Clinical Laboratories                                                                                                                                                                 | COVID-19 Genomics UK (COG-UK) Consortium                                   | Sam Haldenby, Anita Lucaci, Steve Paterson, Julian Hiscox, Alistair Darby, M Almsaud, A Alrezaihi, Muhannad Alruwaili, Stuart D Armstrong, Jones Benjamin, Eleanor G Bentley, Anu Chawla, Jordan J Clark, Angela Cowell, Richard Eccles, Isabel Garcia-Dorival, Margaret Gemmell, Alessandro Gerada, PKF Gilmore, Richard Gregory, Ximeng Han, Catherine Hartley, Margaret Hughes, Miren Iturriza-Gomara, James Johnson, L Luu, Jenifer Manson, Charlotte Nelson, Elaine O'Toole, Cassie Olateju, Rebekah Penrice-Randal, Lucille Rainbow, N.P Randle, Trevor Ian Robinson, Parul Sharma, Ghada T Shawli, James P Stewart, Neil Swainston, Ecaterina Vamos, Joanne Watts, Mark Whitehead |
| EPI_ISL_838765, EPI_ISL_838766, EPI_ISL_838767, EPI_ISL_838768, EPI_ISL_838769, EPI_ISL_838770, EPI_ISL_838771, EPI_ISL_838772, EPI_ISL_838773, EPI_ISL_838774, EPI_ISL_838775, EPI_ISL_838776, EPI_ISL_838777, EPI_ISL_838778, EPI_ISL_838779, EPI_ISL_838780, EPI_ISL_838781, EPI_ISL_838782, EPI_ISL_838783, EPI_ISL_838784, EPI_ISL_838785, EPI_ISL_838786, EPI_ISL_838787, EPI_ISL_838788, EPI_ISL_838789, EPI_ISL_838790, EPI_ISL_838791, EPI_ISL_838792, EPI_ISL_838793, EPI_ISL_838794, EPI_ISL_838795, EPI_ISL_838796, EPI_ISL_838797, EPI_ISL_838798, EPI_ISL_838799, EPI_ISL_838800, EPI_ISL_838801, EPI_ISL_838802, EPI_ISL_838803, EPI_ISL_838804, EPI_ISL_838805, EPI_ISL_838806, EPI_ISL_838807, EPI_ISL_838808, EPI_ISL_838809, EPI_ISL_838810, EPI_ISL_838811, EPI_ISL_838812, EPI_ISL_838813, EPI_ISL_838814, EPI_ISL_838815, EPI_ISL_838816, EPI_ISL_838817, EPI_ISL_838818, EPI_ISL_838819, EPI_ISL_838820, EPI_ISL_838821, EPI_ISL_838822, EPI_ISL_838823, EPI_ISL_838824, EPI_ISL_838825, EPI_ISL_838826, EPI_ISL_838827, EPI_ISL_838828, EPI_ISL_838829, EPI_ISL_838830, EPI_ISL_838831, EPI_ISL_838832, EPI_ISL_838833, EPI_ISL_838834, EPI_ISL_838835, EPI_ISL_838836, EPI_ISL_838837, EPI_ISL_838838, EPI_ISL_838839, EPI_ISL_838840, EPI_ISL_838841, EPI_ISL_839041, EPI_ISL_839042, EPI_ISL_839043, EPI_ISL_839054, EPI_ISL_839060, EPI_ISL_839063, EPI_ISL_839064, EPI_ISL_839065, EPI_ISL_839066, EPI_ISL_839067, EPI_ISL_839068, EPI_ISL_839069, EPI_ISL_839070, EPI_ISL_839071, EPI_ISL_839072, EPI_ISL_839073, EPI_ISL_839074, EPI_ISL_839075, EPI_ISL_839076, EPI_ISL_839077, EPI_ISL_839078, EPI_ISL_839079, EPI_ISL_839080, EPI_ISL_839081, EPI_ISL_839082, EPI_ISL_839083, EPI_ISL_839084, EPI_ISL_839085, EPI_ISL_839086, EPI_ISL_839087, EPI_ISL_839088, EPI_ISL_839089, EPI_ISL_839090, EPI_ISL_839091, EPI_ISL_839092, EPI_ISL_839093, EPI_ISL_839094, EPI_ISL_839095, EPI_ISL_839096, EPI_ISL_839097, EPI_ISL_839098, EPI_ISL_839099, EPI_ISL_839100, EPI_ISL_839101, EPI_ISL_839102, EPI_ISL_839103, EPI_ISL_839104, EPI_ISL_839105, EPI_ISL_839106, EPI_ISL_839107, EPI_ISL_839108, EPI_ISL_839109, EPI_ISL_839110, EPI_ISL_839111, EPI_ISL_839112, EPI_ISL_839113, EPI_ISL_839114, EPI_ISL_839115, EPI_ISL_839116, EPI_ISL_839117, EPI_ISL_839118, EPI_ISL_839119, EPI_ISL_839120, EPI_ISL_839121, EPI_ISL_839122, EPI_ISL_839123, EPI_ISL_839124, EPI_ISL_839125, EPI_ISL_839126, EPI_ISL_839127, EPI_ISL_839128, EPI_ISL_839129, EPI_ISL_839130, EPI_ISL_839131, EPI_ISL_839132, EPI_ISL_839133, EPI_ISL_839134, EPI_ISL_839135, EPI_ISL_839136, EPI_ISL_839137, EPI_ISL_839138, EPI_ISL_839139, EPI_ISL_839140, EPI_ISL_839141, EPI_ISL_839142, EPI_ISL_839143, EPI_ISL_839144, EPI_ISL_839145, EPI_ISL_839146, EPI_ISL_839147, EPI_ISL_839148, EPI_ISL_839149, EPI_ISL_839150, EPI_ISL_839151, EPI_ISL_839152, EPI_ISL_839153, EPI_ISL_839154, EPI_ISL_839155, EPI_ISL_839156, EPI_ISL_839157, EPI_ISL_839158, EPI_ISL_839159, EPI_ISL_839160, EPI_ISL_839161, EPI_ISL_839162, EPI_ISL_839163, EPI_ISL_839164, EPI_ISL_839165, EPI_ISL_839166, EPI_ISL_839167, EPI_ISL_839168, EPI_ISL_839169, EPI_ISL_839170, EPI_ISL_839171, EPI_ISL_839172, EPI_ISL_839173, EPI_ISL_839174, EPI_ISL_839175, EPI_ISL_839176, EPI_ISL_839177, EPI_ISL_839178, EPI_ISL_839179, EPI_ISL_839180, EPI_ISL_839181, EPI_ISL_839182, EPI_ISL_839183, EPI_ISL_839184, EPI_ISL_839185, EPI_ISL_839186, EPI_ISL_839187, EPI_ISL_839188, EPI_ISL_839189, EPI_ISL_839190, EPI_ISL_839191, EPI_ISL_839192, EPI_ISL_839193, EPI_ISL_839194, EPI_ISL_839195, EPI_ISL_839196, EPI_ISL_839197, EPI_ISL_839198, EPI_ISL_839199, EPI_ISL_839200, EPI_ISL_839201, EPI_ISL_839202, EPI_ISL_839203, EPI_ISL_839204, EPI_ISL_839205, EPI_ISL_839206, EPI_ISL_839207, EPI_ISL_839208, EPI_ISL_839209, EPI_ISL_839210, EPI_ISL_839211, EPI_ISL_839212, EPI_ISL_839213, EPI_ISL_839214, EPI_ISL_839215, EPI_ISL_839216, EPI_ISL_839217, EPI_ISL_839218, EPI_ISL_839219, EPI_ISL_839220, EPI_ISL_839221, EPI_ISL_839222, EPI_ISL_839223, EPI_ISL_839224, EPI_ISL_839225, EPI_ISL_839226, EPI_ISL_839227, EPI_ISL_839228, EPI_ISL_839229, EPI_ISL_839230, EPI_ISL_839231, EPI_ISL_839232, EPI_ISL_839233, EPI_ISL_839234, EPI_ISL_839235, EPI_ISL_839236, EPI_ISL_839237, EPI_ISL_839238, EPI_ISL_839239 | see above                                                                                                                                                                                                                                                                                                                                                                                                                                                                                                                                                                                                                                                                                                                                                                                                                                                                                                      | University College London, Great Ormond Street Hospital for Children NHS Foundation Trust, Imperial College Healthcare NHS Trust                                                                | COVID-19 Genomics UK (COG-UK) Consortium                                   | Sergi Castellano, Rachel Williams, Mark Kristiansen, Paola Resende Silva, Sunando Roy, Tony Brooks, Helena Tutill, Paola Niala, Patricia Dyal, Charlotte Williams, Leysa Forrest, Yasmin Panchbhaya, Jacqueline Findlay, Samuel Weeks, Julianne Brown, Kathryn Harris, Paul Randell, James Price, Alison Holmes, Judith Breuer                                                                                                                                                                                                                                                                                                                                                           |
| EPI_ISL_839683, EPI_ISL_839684, EPI_ISL_839685, EPI_ISL_839686, EPI_ISL_839687, EPI_ISL_839688, EPI_ISL_839689, EPI_ISL_839690, EPI_ISL_839691, EPI_ISL_839692, EPI_ISL_839693, EPI_ISL_839694, EPI_ISL_839695, EPI_ISL_839696, EPI_ISL_839697, EPI_ISL_839698, EPI_ISL_839699, EPI_ISL_839700, EPI_ISL_839701, EPI_ISL_839702, EPI_ISL_839703, EPI_ISL_839704, EPI_ISL_839705, EPI_ISL_839706, EPI_ISL_839707, EPI_ISL_839708, EPI_ISL_839709, EPI_ISL_839710, EPI_ISL_839711, EPI_ISL_839712, EPI_ISL_839713, EPI_ISL_839714, EPI_ISL_839715, EPI_ISL_839716, EPI_ISL_839717, EPI_ISL_839718, EPI_ISL_839719, EPI_ISL_839720, EPI_ISL_839721, EPI_ISL_839722, EPI_ISL_839723, EPI_ISL_839724, EPI_ISL_839725, EPI_ISL_839726, EPI_ISL_839727, EPI_ISL_839728, EPI_ISL_839729, EPI_ISL_839730                                                                                                                                                                                                                                                                                                                                                                                                                                                                                                                                                                                                                                                                                                                                                                                                                                                                                                                                                                                                                                                                                                                                                                                                                                                                                                                                                                                                                                                                                                                                                                                                                                                                                                                                                                                                                                                                                                                                                                                                                                                                                                                                                                                                                                                                                                                                                                                                                                                                                                                                                                                                                                                                                                                                                                                                                                                                                                                                                                                                                                                                                                                                                                                                                                                                                                                                                                                                                                                                                                                 | EPI_ISL_839683, EPI_ISL_839684, EPI_ISL_839685, EPI_ISL_839686, EPI_ISL_839687, EPI_ISL_839688, E                                                                                                                                                                                                                                                                                                                                                                                                                                                                                                                                                                                                                                                                                                                                                                                                              |                                                                                                                                                                                                 |                                                                            |                                                                                                                                                                                                                                                                                                                                                                                                                                                                                                                                                                                                                                                                                          |

|                                                                                                                                                                                                                                                                                                                                                                                                                                                                                                                                                                                                                                                                                                                                                                                                                                                                                                                                                                                                                                                                                                                                                                                                                                                                                                                                                                                                                                                                                                                                                                                                                                                                                                                                                                                                                                                                                                |           |                                                                                                                                                                                  |                                                                            |                                                                                                                                                                                                                                                                                                                                                                          |
|------------------------------------------------------------------------------------------------------------------------------------------------------------------------------------------------------------------------------------------------------------------------------------------------------------------------------------------------------------------------------------------------------------------------------------------------------------------------------------------------------------------------------------------------------------------------------------------------------------------------------------------------------------------------------------------------------------------------------------------------------------------------------------------------------------------------------------------------------------------------------------------------------------------------------------------------------------------------------------------------------------------------------------------------------------------------------------------------------------------------------------------------------------------------------------------------------------------------------------------------------------------------------------------------------------------------------------------------------------------------------------------------------------------------------------------------------------------------------------------------------------------------------------------------------------------------------------------------------------------------------------------------------------------------------------------------------------------------------------------------------------------------------------------------------------------------------------------------------------------------------------------------|-----------|----------------------------------------------------------------------------------------------------------------------------------------------------------------------------------|----------------------------------------------------------------------------|--------------------------------------------------------------------------------------------------------------------------------------------------------------------------------------------------------------------------------------------------------------------------------------------------------------------------------------------------------------------------|
| EPI_ISL_840657, EPI_ISL_840658, EPI_ISL_840671, EPI_ISL_840672, EPI_ISL_840673, EPI_ISL_840674, EPI_ISL_840675, EPI_ISL_840676, EPI_ISL_840695, EPI_ISL_840696, EPI_ISL_840697, EPI_ISL_840698, EPI_ISL_840699, EPI_ISL_840700, EPI_ISL_840701, EPI_ISL_840702, EPI_ISL_840703, EPI_ISL_840774, EPI_ISL_840775, EPI_ISL_840776, EPI_ISL_840777, EPI_ISL_840778, EPI_ISL_840779, EPI_ISL_840781, EPI_ISL_840782, EPI_ISL_840783, EPI_ISL_840785, EPI_ISL_840787, EPI_ISL_840790, EPI_ISL_840794, EPI_ISL_840795, EPI_ISL_840796, EPI_ISL_840798, EPI_ISL_840799, EPI_ISL_840801, EPI_ISL_840802, EPI_ISL_840803, EPI_ISL_840804, EPI_ISL_840805, EPI_ISL_840806, EPI_ISL_840808, EPI_ISL_840810, EPI_ISL_840811, EPI_ISL_840812, EPI_ISL_840813, EPI_ISL_840814, EPI_ISL_840815                                                                                                                                                                                                                                                                                                                                                                                                                                                                                                                                                                                                                                                                                                                                                                                                                                                                                                                                                                                                                                                                                                                 | see above | Originating lab: Wales Specialist Virology Centre Sequencing lab: Pathogen Genomics Unit                                                                                         | Public Health Wales Microbiology Cardiff Wales Specialist Virology Centre  | Catherine Moore, Johnathan Evans, Laura Gifford, Malorie Perry, Simon Cottrell, Angela Marchbank, Alec Birchley, Alexander Adams, Amy Gaskin, Bree Gatica-Wilcox, Jason Coombes, Joel Southgate, Lauren Gilbert, Lee Graham, Nicole Pacchiarini, Sara Kumziene-Summerhayes, Sarah Taylor, Sophie Jones, Sara Rey, Matthew Bull, Joanne Watkins, Sally Corden, Tom Connor |
| EPI_ISL_840816, EPI_ISL_840819, EPI_ISL_840821, EPI_ISL_840837, EPI_ISL_840839, EPI_ISL_840841, EPI_ISL_840895, EPI_ISL_840897, EPI_ISL_840898, EPI_ISL_840899, EPI_ISL_840900, EPI_ISL_840916, EPI_ISL_840917, EPI_ISL_840918, EPI_ISL_840919, EPI_ISL_841057, EPI_ISL_841058, EPI_ISL_841083, EPI_ISL_841087, EPI_ISL_841088, EPI_ISL_841089, EPI_ISL_841090, EPI_ISL_841091, EPI_ISL_841092, EPI_ISL_841093, EPI_ISL_841094, EPI_ISL_841095, EPI_ISL_841096, EPI_ISL_841097, EPI_ISL_841099, EPI_ISL_841100, EPI_ISL_841101, EPI_ISL_841102, EPI_ISL_841103, EPI_ISL_841104, EPI_ISL_841105, EPI_ISL_841106, EPI_ISL_841107, EPI_ISL_841109, EPI_ISL_841110, EPI_ISL_841111, EPI_ISL_841112, EPI_ISL_841113, EPI_ISL_841114, EPI_ISL_841115, EPI_ISL_841117, EPI_ISL_841118, EPI_ISL_841119, EPI_ISL_841120, EPI_ISL_841121, EPI_ISL_841122, EPI_ISL_841123, EPI_ISL_841302, EPI_ISL_841303, EPI_ISL_841304, EPI_ISL_841305                                                                                                                                                                                                                                                                                                                                                                                                                                                                                                                                                                                                                                                                                                                                                                                                                                                                                                                                                                 | see above | Wales Specialist Virology Centre Sequencing lab: Pathogen Genomics Unit                                                                                                          | Public Health Wales Microbiology Cardiff Wales Specialist Virology Centre  | Catherine Moore, Johnathan Evans, Laura Gifford, Malorie Perry, Simon Cottrell, Angela Marchbank, Alec Birchley, Alexander Adams, Amy Gaskin, Bree Gatica-Wilcox, Jason Coombes, Joel Southgate, Lauren Gilbert, Lee Graham, Nicole Pacchiarini, Sara Kumziene-Summerhayes, Sarah Taylor, Sophie Jones, Sara Rey, Matthew Bull, Joanne Watkins, Sally Corden, Tom Connor |
| EPI_ISL_841321, EPI_ISL_841355, EPI_ISL_841359, EPI_ISL_841360, EPI_ISL_841361, EPI_ISL_841362, EPI_ISL_841363, EPI_ISL_841364, EPI_ISL_841365, EPI_ISL_841366, EPI_ISL_841367, EPI_ISL_841368, EPI_ISL_841369, EPI_ISL_841370, EPI_ISL_841508, EPI_ISL_841509, EPI_ISL_841521, EPI_ISL_841522, EPI_ISL_841580, EPI_ISL_841581, EPI_ISL_841584, EPI_ISL_841587, EPI_ISL_841591, EPI_ISL_841608                                                                                                                                                                                                                                                                                                                                                                                                                                                                                                                                                                                                                                                                                                                                                                                                                                                                                                                                                                                                                                                                                                                                                                                                                                                                                                                                                                                                                                                                                                 | see above | Originating lab: Wales Specialist Virology Centre Sequencing lab: Pathogen Genomics Unit                                                                                         | Public Health Wales Microbiology Cardiff Wales Specialist Virology Centre  | Catherine Moore, Johnathan Evans, Laura Gifford, Malorie Perry, Simon Cottrell, Angela Marchbank, Alec Birchley, Alexander Adams, Amy Gaskin, Bree Gatica-Wilcox, Jason Coombes, Joel Southgate, Lauren Gilbert, Lee Graham, Nicole Pacchiarini, Sara Kumziene-Summerhayes, Sarah Taylor, Sophie Jones, Sara Rey, Matthew Bull, Joanne Watkins, Sally Corden, Tom Connor |
| EPI_ISL_841978, EPI_ISL_842004, EPI_ISL_842014, EPI_ISL_842015                                                                                                                                                                                                                                                                                                                                                                                                                                                                                                                                                                                                                                                                                                                                                                                                                                                                                                                                                                                                                                                                                                                                                                                                                                                                                                                                                                                                                                                                                                                                                                                                                                                                                                                                                                                                                                 |           | Centre for Enzyme Innovation, University of Portsmouth / Translational Research Laboratory, Portsmouth Hospitals NHS Trust                                                       | COVID-19 Genomics UK (COG-UK) Consortium                                   | Angela Beckett, Yann Bourgeois, Garry Scarlett, Sharon Glaysheer, Scott Elliott, Kelly Bicknell, Robert Impey, Allyson Lloyd, Sarah Wyllie, Ethan Butcher, Anoop Chauhan, Samuel Robson                                                                                                                                                                                  |
| EPI_ISL_842209, EPI_ISL_842265, EPI_ISL_842270, EPI_ISL_842273, EPI_ISL_842293, EPI_ISL_842312, EPI_ISL_842325, EPI_ISL_842338, EPI_ISL_842341                                                                                                                                                                                                                                                                                                                                                                                                                                                                                                                                                                                                                                                                                                                                                                                                                                                                                                                                                                                                                                                                                                                                                                                                                                                                                                                                                                                                                                                                                                                                                                                                                                                                                                                                                 |           | Virology Department, Sheffield Teaching Hospitals NHS Foundation Trust/Department of Infection, Immunity and Cardiovascular Disease, The Medical School, University of Sheffield | COVID-19 Genomics UK (COG-UK) Consortium                                   | Thushan de Silva, Matthew Parker, Nikki Smith, Adri Agyal, Rebecca Brown, Luke Green, Rachel Tucker, Paul Parsons, Danielle Groves, Katie Johnson, Laura Carrilero, Alex Keeley, Dave Partridge, Matthew Wyles, Benjamin Lindsey, Mehmet Yavuz, Mohammad Raza, Cariad Evans                                                                                              |
| EPI_ISL_842356, EPI_ISL_842361, EPI_ISL_842362, EPI_ISL_842367, EPI_ISL_842422, EPI_ISL_842423, EPI_ISL_842424, EPI_ISL_842425, EPI_ISL_842426, EPI_ISL_842427, EPI_ISL_842428, EPI_ISL_842429, EPI_ISL_842430, EPI_ISL_842431, EPI_ISL_842432, EPI_ISL_842433, EPI_ISL_842434, EPI_ISL_842435, EPI_ISL_842436, EPI_ISL_842437, EPI_ISL_842438, EPI_ISL_842439, EPI_ISL_842440, EPI_ISL_842441, EPI_ISL_842442, EPI_ISL_842443, EPI_ISL_842444, EPI_ISL_842445, EPI_ISL_842447, EPI_ISL_842448, EPI_ISL_842449, EPI_ISL_842450, EPI_ISL_842451, EPI_ISL_842452, EPI_ISL_842453, EPI_ISL_842454, EPI_ISL_842455, EPI_ISL_842456, EPI_ISL_842457, EPI_ISL_842458, EPI_ISL_842459, EPI_ISL_842460, EPI_ISL_842461, EPI_ISL_842462, EPI_ISL_842463, EPI_ISL_842464, EPI_ISL_842465, EPI_ISL_842466, EPI_ISL_842467, EPI_ISL_842468, EPI_ISL_842469, EPI_ISL_842470, EPI_ISL_842472, EPI_ISL_842473, EPI_ISL_842474, EPI_ISL_842475, EPI_ISL_842476, EPI_ISL_842477, EPI_ISL_842478, EPI_ISL_842479, EPI_ISL_842480, EPI_ISL_842481, EPI_ISL_842482, EPI_ISL_842483, EPI_ISL_842484, EPI_ISL_842485, EPI_ISL_842486, EPI_ISL_842487, EPI_ISL_842488, EPI_ISL_842489, EPI_ISL_842490, EPI_ISL_842491, EPI_ISL_842492, EPI_ISL_842493, EPI_ISL_842494, EPI_ISL_842496, EPI_ISL_842497, EPI_ISL_842498, EPI_ISL_842499, EPI_ISL_842500, EPI_ISL_842501, EPI_ISL_842502, EPI_ISL_842503, EPI_ISL_842504, EPI_ISL_842505, EPI_ISL_842506, EPI_ISL_842507, EPI_ISL_842508, EPI_ISL_842509, EPI_ISL_842510, EPI_ISL_842511, EPI_ISL_842513, EPI_ISL_842585, EPI_ISL_842586, EPI_ISL_842587, EPI_ISL_842588, EPI_ISL_842589, EPI_ISL_842590, EPI_ISL_842591, EPI_ISL_842592, EPI_ISL_842593, EPI_ISL_842594, EPI_ISL_842596, EPI_ISL_842598, EPI_ISL_842599, EPI_ISL_842600, EPI_ISL_842601, EPI_ISL_842602, EPI_ISL_842603, EPI_ISL_842604, EPI_ISL_842605, EPI_ISL_842606, EPI_ISL_842607, EPI_ISL_842608 | see above | Bioinformatics and Biostatistics Lab, Advanced Sequencing Facility                                                                                                               | COVID-19 Genomics UK (COG-UK) Consortium                                   | Aengus Stewart, Jerome Nicod, Chelsea Sawyer, Laura Cubitt, Harshil Patel, Margaret Crawford                                                                                                                                                                                                                                                                             |
| EPI_ISL_843145, EPI_ISL_843146, EPI_ISL_843147, EPI_ISL_843148, EPI_ISL_843149, EPI_ISL_843150                                                                                                                                                                                                                                                                                                                                                                                                                                                                                                                                                                                                                                                                                                                                                                                                                                                                                                                                                                                                                                                                                                                                                                                                                                                                                                                                                                                                                                                                                                                                                                                                                                                                                                                                                                                                 |           | Barts Health NHS Trust                                                                                                                                                           | COVID-19 Genomics UK (COG-UK) Consortium                                   | CUTINO-MOGUEL, Maria-Teresa; HARRINGTON, David; OWOYEMI, Dola; SHYLINI, Raghavendran; BROAD, Claire; KELE, Beatrix                                                                                                                                                                                                                                                       |
| EPI_ISL_843151, EPI_ISL_843152, EPI_ISL_843153, EPI_ISL_843154, EPI_ISL_843155, EPI_ISL_843156, EPI_ISL_843157, EPI_ISL_843158, EPI_ISL_843159, EPI_ISL_843160, EPI_ISL_843161, EPI_ISL_843162, EPI_ISL_843163, EPI_ISL_843164, EPI_ISL_843165, EPI_ISL_843166                                                                                                                                                                                                                                                                                                                                                                                                                                                                                                                                                                                                                                                                                                                                                                                                                                                                                                                                                                                                                                                                                                                                                                                                                                                                                                                                                                                                                                                                                                                                                                                                                                 | see above | Regional Virus Laboratory, Belfast Health and Social Care Trust                                                                                                                  | COVID-19 Genomics UK (COG-UK) Consortium                                   | Conall McCaughey, James McKenna, Tanya Curran, Susan Feeney, Alison Watt, Ciara Cox, Mairead Connor, Zoltan Molnar, David Simpson, Derek Fairley                                                                                                                                                                                                                         |
| EPI_ISL_846526, EPI_ISL_846536                                                                                                                                                                                                                                                                                                                                                                                                                                                                                                                                                                                                                                                                                                                                                                                                                                                                                                                                                                                                                                                                                                                                                                                                                                                                                                                                                                                                                                                                                                                                                                                                                                                                                                                                                                                                                                                                 |           | Lighthouse Lab in Alderley Park                                                                                                                                                  | Wellcome Sanger Institute for the COVID-19 Genomics UK (COG-UK) Consortium | Jacquelyn Wynn, Mairead Hyland, The Lighthouse Lab in Alderley Park and Alex Alderton, Roberto Amato, Sonia Goncalves, Ewan Harrison, David K. Jackson, Ian Johnston, Dominic Kwiatkowski, Cordelia Langford, John Sillitoe on behalf of the Wellcome Sanger Institute COVID-19 Surveillance Team                                                                        |
| EPI_ISL_852017                                                                                                                                                                                                                                                                                                                                                                                                                                                                                                                                                                                                                                                                                                                                                                                                                                                                                                                                                                                                                                                                                                                                                                                                                                                                                                                                                                                                                                                                                                                                                                                                                                                                                                                                                                                                                                                                                 |           | Lighthouse Lab in Milton Keynes                                                                                                                                                  | Wellcome Sanger Institute for the COVID-19 Genomics UK (COG-UK) Consortium | The Lighthouse Lab in Milton Keynes and Alex Alderton, Roberto Amato, Sonia Goncalves, Ewan Harrison, David K. Jackson, Ian Johnston, Dominic Kwiatkowski, Cordelia Langford, John Sillitoe on behalf of the Wellcome Sanger Institute COVID-19 Surveillance Team                                                                                                        |
| EPI_ISL_852191                                                                                                                                                                                                                                                                                                                                                                                                                                                                                                                                                                                                                                                                                                                                                                                                                                                                                                                                                                                                                                                                                                                                                                                                                                                                                                                                                                                                                                                                                                                                                                                                                                                                                                                                                                                                                                                                                 |           | Lighthouse Lab in Alderley Park                                                                                                                                                  | Wellcome Sanger Institute for the COVID-19 Genomics UK (COG-UK) Consortium | Jacquelyn Wynn, Mairead Hyland, The Lighthouse Lab in Alderley Park and Alex Alderton, Roberto Amato, Sonia Goncalves, Ewan Harrison, David K. Jackson, Ian Johnston, Dominic Kwiatkowski, Cordelia Langford, John Sillitoe on behalf of the Wellcome Sanger Institute COVID-19 Surveillance Team                                                                        |
| EPI_ISL_858274, EPI_ISL_858313                                                                                                                                                                                                                                                                                                                                                                                                                                                                                                                                                                                                                                                                                                                                                                                                                                                                                                                                                                                                                                                                                                                                                                                                                                                                                                                                                                                                                                                                                                                                                                                                                                                                                                                                                                                                                                                                 |           | Lighthouse Lab in Glasgow                                                                                                                                                        | Wellcome Sanger Institute for the COVID-19 Genomics UK (COG-UK) Consortium | Harper VanSteenhouse, Yumi Kasai, David Gray, Carol Clugston, Anna Dominiczak and Alex Alderton, Roberto Amato, Sonia Goncalves, Ewan Harrison, David K. Jackson, Ian Johnston, Dominic Kwiatkowski, Cordelia Langford, John Sillitoe on behalf of the Wellcome Sanger Institute COVID-19 Surveillance Team                                                              |
| EPI_ISL_858573, EPI_ISL_858575, EPI_ISL_858577, EPI_ISL_858578, EPI_ISL_858579, EPI_ISL_858580, EPI_ISL_858582                                                                                                                                                                                                                                                                                                                                                                                                                                                                                                                                                                                                                                                                                                                                                                                                                                                                                                                                                                                                                                                                                                                                                                                                                                                                                                                                                                                                                                                                                                                                                                                                                                                                                                                                                                                 |           | Lighthouse Lab in Alderley Park                                                                                                                                                  | Wellcome Sanger Institute for the COVID-19 Genomics UK (COG-UK) Consortium | Jacquelyn Wynn, Mairead Hyland, The Lighthouse Lab in Alderley Park and Alex Alderton, Roberto Amato, Sonia Goncalves, Ewan Harrison, David K. Jackson, Ian Johnston, Dominic Kwiatkowski, Cordelia Langford, John Sillitoe on behalf of the Wellcome Sanger Institute COVID-19 Surveillance Team                                                                        |
| EPI_ISL_858583, EPI_ISL_858584, EPI_ISL_858586, EPI_ISL_858589, EPI_ISL_858590, EPI_ISL_858591, EPI_ISL_858593, EPI_ISL_858595, EPI_ISL_858596, EPI_ISL_858597, EPI_ISL_858599, EPI_ISL_858602, EPI_ISL_858603, EPI_ISL_858605, EPI_ISL_858606, EPI_ISL_858611, EPI_ISL_858614, EPI_ISL_858617, EPI_ISL_858619, EPI_ISL_858620, EPI_ISL_858621, EPI_ISL_858622, EPI_ISL_858624, EPI_ISL_858625, EPI_ISL_858629, EPI_ISL_858631, EPI_ISL_858632, EPI_ISL_858633, EPI_ISL_858634, EPI_ISL_858636, EPI_ISL_858639                                                                                                                                                                                                                                                                                                                                                                                                                                                                                                                                                                                                                                                                                                                                                                                                                                                                                                                                                                                                                                                                                                                                                                                                                                                                                                                                                                                 | see above | Lighthouse Lab in Glasgow                                                                                                                                                        | Wellcome Sanger Institute for the COVID-19 Genomics UK (COG-UK) Consortium | Harper VanSteenhouse, Yumi Kasai, David Gray, Carol Clugston, Anna Dominiczak and Alex Alderton, Roberto Amato, Sonia Goncalves, Ewan Harrison, David K. Jackson, Ian Johnston, Dominic Kwiatkowski, Cordelia Langford, John Sillitoe on behalf of the Wellcome Sanger Institute COVID-19 Surveillance Team                                                              |
| EPI_ISL_858644, EPI_ISL_858645, EPI_ISL_858647, EPI_ISL_858648, EPI_ISL_858649, EPI_ISL_858653, EPI_ISL_858654, EPI_ISL_858655, EPI_ISL_858662, EPI_ISL_858663, EPI_ISL_858666, EPI_ISL_858667, EPI_ISL_858669, EPI_ISL_858670, EPI_ISL_858671, EPI_ISL_858672, EPI_ISL_858673, EPI_ISL_858674, EPI_ISL_858675, EPI_ISL_858676, EPI_ISL_858677, EPI_ISL_858678, EPI_ISL_858679, EPI_ISL_858680, EPI_ISL_858681, EPI_ISL_858682, EPI_ISL_858683, EPI_ISL_858684, EPI_ISL_858685, EPI_ISL_858686, EPI_ISL_858687, EPI_ISL_858688, EPI_ISL_858689, EPI_ISL_858690, EPI_ISL_858691, EPI_ISL_858692, EPI_ISL_858693, EPI_ISL_858694, EPI_ISL_858696, EPI_ISL_858697, EPI_ISL_858698, EPI_ISL_858699, EPI_ISL_858700                                                                                                                                                                                                                                                                                                                                                                                                                                                                                                                                                                                                                                                                                                                                                                                                                                                                                                                                                                                                                                                                                                                                                                                 | see above | Lighthouse Lab in Alderley Park                                                                                                                                                  | Wellcome Sanger Institute for the COVID-19 Genomics UK (COG-UK) Consortium | Jacquelyn Wynn, Mairead Hyland, The Lighthouse Lab in Alderley Park and Alex Alderton, Roberto Amato, Sonia Goncalves, Ewan Harrison, David K. Jackson, Ian Johnston, Dominic Kwiatkowski, Cordelia Langford, John Sillitoe on behalf of the Wellcome Sanger Institute COVID-19 Surveillance Team                                                                        |
| EPI_ISL_858711, EPI_ISL_858712                                                                                                                                                                                                                                                                                                                                                                                                                                                                                                                                                                                                                                                                                                                                                                                                                                                                                                                                                                                                                                                                                                                                                                                                                                                                                                                                                                                                                                                                                                                                                                                                                                                                                                                                                                                                                                                                 |           | Lighthouse Lab in Glasgow                                                                                                                                                        | Wellcome Sanger Institute for the COVID-19 Genomics UK (COG-UK) Consortium | Harper VanSteenhouse, Yumi Kasai, David Gray, Carol Clugston, Anna Dominiczak and Alex Alderton, Roberto Amato, Sonia Goncalves, Ewan Harrison, David K. Jackson, Ian Johnston, Dominic Kwiatkowski, Cordelia Langford, John Sillitoe on behalf of the Wellcome Sanger Institute COVID-19 Surveillance Team                                                              |
| EPI_ISL_858713, EPI_ISL_858714                                                                                                                                                                                                                                                                                                                                                                                                                                                                                                                                                                                                                                                                                                                                                                                                                                                                                                                                                                                                                                                                                                                                                                                                                                                                                                                                                                                                                                                                                                                                                                                                                                                                                                                                                                                                                                                                 |           | Lighthouse Lab in Alderley Park                                                                                                                                                  | Wellcome Sanger Institute for the COVID-19 Genomics UK (COG-UK) Consortium | Jacquelyn Wynn, Mairead Hyland, The Lighthouse Lab in Alderley Park and Alex Alderton, Roberto Amato, Sonia Goncalves, Ewan Harrison, David K. Jackson, Ian Johnston, Dominic Kwiatkowski, Cordelia Langford, John Sillitoe on behalf of the Wellcome Sanger Institute COVID-19 Surveillance Team                                                                        |
| EPI_ISL_858715, EPI_ISL_858716, EPI_ISL_858717, EPI_ISL_858718                                                                                                                                                                                                                                                                                                                                                                                                                                                                                                                                                                                                                                                                                                                                                                                                                                                                                                                                                                                                                                                                                                                                                                                                                                                                                                                                                                                                                                                                                                                                                                                                                                                                                                                                                                                                                                 |           | Lighthouse Lab in Glasgow                                                                                                                                                        | Wellcome Sanger Institute for the COVID-19 Genomics UK (COG-UK) Consortium | Harper VanSteenhouse, Yumi Kasai, David Gray, Carol Clugston, Anna Dominiczak and Alex Alderton, Roberto Amato, Sonia Goncalves, Ewan Harrison, David K. Jackson, Ian Johnston, Dominic Kwiatkowski, Cordelia Langford, John Sillitoe on behalf of the Wellcome Sanger Institute COVID-19 Surveillance Team                                                              |
| EPI_ISL_858719, EPI_ISL_858720                                                                                                                                                                                                                                                                                                                                                                                                                                                                                                                                                                                                                                                                                                                                                                                                                                                                                                                                                                                                                                                                                                                                                                                                                                                                                                                                                                                                                                                                                                                                                                                                                                                                                                                                                                                                                                                                 |           | Lighthouse Lab in Alderley Park                                                                                                                                                  | Wellcome Sanger Institute for the COVID-19 Genomics UK (COG-UK) Consortium | Jacquelyn Wynn, Mairead Hyland, The Lighthouse Lab in Alderley Park and Alex Alderton, Roberto Amato, Sonia Goncalves, Ewan Harrison, David K. Jackson, Ian Johnston, Dominic Kwiatkowski, Cordelia Langford, John Sillitoe on behalf of the Wellcome Sanger Institute COVID-19 Surveillance Team                                                                        |
| EPI_ISL_858721, EPI_ISL_858722,                                                                                                                                                                                                                                                                                                                                                                                                                                                                                                                                                                                                                                                                                                                                                                                                                                                                                                                                                                                                                                                                                                                                                                                                                                                                                                                                                                                                                                                                                                                                                                                                                                                                                                                                                                                                                                                                |           | Lighthouse Lab in Glasgow                                                                                                                                                        | Wellcome Sanger Institute for the COVID-19 Genomics UK                     | Harper VanSteenhouse, Yumi Kasai, David Gray, Carol Clugston, Anna Dominiczak and Alex Alderton, Roberto Amato, Sonia Goncalves, Ewan Harrison,                                                                                                                                                                                                                          |



|                                                                                                                                                                                                                                                                                                                                                                                                                                                                                                                                                                                                                                                                                                                                                                                                                                                                                                                                                                                                                |                                                                                                                                                                                                 |                                                                            |                                                                                                                                                                                                                                                                                                                                                                                                                                     |
|----------------------------------------------------------------------------------------------------------------------------------------------------------------------------------------------------------------------------------------------------------------------------------------------------------------------------------------------------------------------------------------------------------------------------------------------------------------------------------------------------------------------------------------------------------------------------------------------------------------------------------------------------------------------------------------------------------------------------------------------------------------------------------------------------------------------------------------------------------------------------------------------------------------------------------------------------------------------------------------------------------------|-------------------------------------------------------------------------------------------------------------------------------------------------------------------------------------------------|----------------------------------------------------------------------------|-------------------------------------------------------------------------------------------------------------------------------------------------------------------------------------------------------------------------------------------------------------------------------------------------------------------------------------------------------------------------------------------------------------------------------------|
| EPI_ISL_858723, EPI_ISL_858724                                                                                                                                                                                                                                                                                                                                                                                                                                                                                                                                                                                                                                                                                                                                                                                                                                                                                                                                                                                 |                                                                                                                                                                                                 | (COG-UK) Consortium                                                        | David K. Jackson, Ian Johnston, Dominic Kwiatkowski, Cordelia Langford, John Sillitoe on behalf of the Wellcome Sanger Institute COVID-19 Surveillance Team                                                                                                                                                                                                                                                                         |
| EPI_ISL_858725                                                                                                                                                                                                                                                                                                                                                                                                                                                                                                                                                                                                                                                                                                                                                                                                                                                                                                                                                                                                 | Lighthouse Lab in Alderley Park                                                                                                                                                                 | Wellcome Sanger Institute for the COVID-19 Genomics UK (COG-UK) Consortium | Jacquelyn Wynn, Mairead Hyland, The Lighthouse Lab in Alderley Park and Alex Alderton, Roberto Amato, Sonia Goncalves, Ewan Harrison, David K. Jackson, Ian Johnston, Dominic Kwiatkowski, Cordelia Langford, John Sillitoe on behalf of the Wellcome Sanger Institute COVID-19 Surveillance Team                                                                                                                                   |
| EPI_ISL_858726, EPI_ISL_858727, EPI_ISL_858728, EPI_ISL_858729, EPI_ISL_858730, EPI_ISL_858731                                                                                                                                                                                                                                                                                                                                                                                                                                                                                                                                                                                                                                                                                                                                                                                                                                                                                                                 | Lighthouse Lab in Glasgow                                                                                                                                                                       | Wellcome Sanger Institute for the COVID-19 Genomics UK (COG-UK) Consortium | Harper VanSteenhouse, Yumi Kasai, David Gray, Carol Clugston, Anna Dominiczak and Alex Alderton, Roberto Amato, Sonia Goncalves, Ewan Harrison, David K. Jackson, Ian Johnston, Dominic Kwiatkowski, Cordelia Langford, John Sillitoe on behalf of the Wellcome Sanger Institute COVID-19 Surveillance Team                                                                                                                         |
| EPI_ISL_858732                                                                                                                                                                                                                                                                                                                                                                                                                                                                                                                                                                                                                                                                                                                                                                                                                                                                                                                                                                                                 | Lighthouse Lab in Alderley Park                                                                                                                                                                 | Wellcome Sanger Institute for the COVID-19 Genomics UK (COG-UK) Consortium | Jacquelyn Wynn, Mairead Hyland, The Lighthouse Lab in Alderley Park and Alex Alderton, Roberto Amato, Sonia Goncalves, Ewan Harrison, David K. Jackson, Ian Johnston, Dominic Kwiatkowski, Cordelia Langford, John Sillitoe on behalf of the Wellcome Sanger Institute COVID-19 Surveillance Team                                                                                                                                   |
| EPI_ISL_858733, EPI_ISL_858734, EPI_ISL_858735, EPI_ISL_858736                                                                                                                                                                                                                                                                                                                                                                                                                                                                                                                                                                                                                                                                                                                                                                                                                                                                                                                                                 | Lighthouse Lab in Glasgow                                                                                                                                                                       | Wellcome Sanger Institute for the COVID-19 Genomics UK (COG-UK) Consortium | Harper VanSteenhouse, Yumi Kasai, David Gray, Carol Clugston, Anna Dominiczak and Alex Alderton, Roberto Amato, Sonia Goncalves, Ewan Harrison, David K. Jackson, Ian Johnston, Dominic Kwiatkowski, Cordelia Langford, John Sillitoe on behalf of the Wellcome Sanger Institute COVID-19 Surveillance Team                                                                                                                         |
| EPI_ISL_858737                                                                                                                                                                                                                                                                                                                                                                                                                                                                                                                                                                                                                                                                                                                                                                                                                                                                                                                                                                                                 | Lighthouse Lab in Alderley Park                                                                                                                                                                 | Wellcome Sanger Institute for the COVID-19 Genomics UK (COG-UK) Consortium | Jacquelyn Wynn, Mairead Hyland, The Lighthouse Lab in Alderley Park and Alex Alderton, Roberto Amato, Sonia Goncalves, Ewan Harrison, David K. Jackson, Ian Johnston, Dominic Kwiatkowski, Cordelia Langford, John Sillitoe on behalf of the Wellcome Sanger Institute COVID-19 Surveillance Team                                                                                                                                   |
| EPI_ISL_858738                                                                                                                                                                                                                                                                                                                                                                                                                                                                                                                                                                                                                                                                                                                                                                                                                                                                                                                                                                                                 | Lighthouse Lab in Glasgow                                                                                                                                                                       | Wellcome Sanger Institute for the COVID-19 Genomics UK (COG-UK) Consortium | Harper VanSteenhouse, Yumi Kasai, David Gray, Carol Clugston, Anna Dominiczak and Alex Alderton, Roberto Amato, Sonia Goncalves, Ewan Harrison, David K. Jackson, Ian Johnston, Dominic Kwiatkowski, Cordelia Langford, John Sillitoe on behalf of the Wellcome Sanger Institute COVID-19 Surveillance Team                                                                                                                         |
| EPI_ISL_858739                                                                                                                                                                                                                                                                                                                                                                                                                                                                                                                                                                                                                                                                                                                                                                                                                                                                                                                                                                                                 | Lighthouse Lab in Alderley Park                                                                                                                                                                 | Wellcome Sanger Institute for the COVID-19 Genomics UK (COG-UK) Consortium | Jacquelyn Wynn, Mairead Hyland, The Lighthouse Lab in Alderley Park and Alex Alderton, Roberto Amato, Sonia Goncalves, Ewan Harrison, David K. Jackson, Ian Johnston, Dominic Kwiatkowski, Cordelia Langford, John Sillitoe on behalf of the Wellcome Sanger Institute COVID-19 Surveillance Team                                                                                                                                   |
| EPI_ISL_858740, EPI_ISL_858741, EPI_ISL_858742, EPI_ISL_858743, EPI_ISL_858744, EPI_ISL_858745, EPI_ISL_858746, EPI_ISL_858747                                                                                                                                                                                                                                                                                                                                                                                                                                                                                                                                                                                                                                                                                                                                                                                                                                                                                 | Lighthouse Lab in Glasgow                                                                                                                                                                       | Wellcome Sanger Institute for the COVID-19 Genomics UK (COG-UK) Consortium | Harper VanSteenhouse, Yumi Kasai, David Gray, Carol Clugston, Anna Dominiczak and Alex Alderton, Roberto Amato, Sonia Goncalves, Ewan Harrison, David K. Jackson, Ian Johnston, Dominic Kwiatkowski, Cordelia Langford, John Sillitoe on behalf of the Wellcome Sanger Institute COVID-19 Surveillance Team                                                                                                                         |
| EPI_ISL_858748                                                                                                                                                                                                                                                                                                                                                                                                                                                                                                                                                                                                                                                                                                                                                                                                                                                                                                                                                                                                 | Lighthouse Lab in Alderley Park                                                                                                                                                                 | Wellcome Sanger Institute for the COVID-19 Genomics UK (COG-UK) Consortium | Jacquelyn Wynn, Mairead Hyland, The Lighthouse Lab in Alderley Park and Alex Alderton, Roberto Amato, Sonia Goncalves, Ewan Harrison, David K. Jackson, Ian Johnston, Dominic Kwiatkowski, Cordelia Langford, John Sillitoe on behalf of the Wellcome Sanger Institute COVID-19 Surveillance Team                                                                                                                                   |
| EPI_ISL_858749, EPI_ISL_858750, EPI_ISL_858751                                                                                                                                                                                                                                                                                                                                                                                                                                                                                                                                                                                                                                                                                                                                                                                                                                                                                                                                                                 | Lighthouse Lab in Glasgow                                                                                                                                                                       | Wellcome Sanger Institute for the COVID-19 Genomics UK (COG-UK) Consortium | Harper VanSteenhouse, Yumi Kasai, David Gray, Carol Clugston, Anna Dominiczak and Alex Alderton, Roberto Amato, Sonia Goncalves, Ewan Harrison, David K. Jackson, Ian Johnston, Dominic Kwiatkowski, Cordelia Langford, John Sillitoe on behalf of the Wellcome Sanger Institute COVID-19 Surveillance Team                                                                                                                         |
| EPI_ISL_858752, EPI_ISL_858753                                                                                                                                                                                                                                                                                                                                                                                                                                                                                                                                                                                                                                                                                                                                                                                                                                                                                                                                                                                 | Lighthouse Lab in Alderley Park                                                                                                                                                                 | Wellcome Sanger Institute for the COVID-19 Genomics UK (COG-UK) Consortium | Jacquelyn Wynn, Mairead Hyland, The Lighthouse Lab in Alderley Park and Alex Alderton, Roberto Amato, Sonia Goncalves, Ewan Harrison, David K. Jackson, Ian Johnston, Dominic Kwiatkowski, Cordelia Langford, John Sillitoe on behalf of the Wellcome Sanger Institute COVID-19 Surveillance Team                                                                                                                                   |
| EPI_ISL_858754, EPI_ISL_858755, EPI_ISL_858756, EPI_ISL_858757, EPI_ISL_858758, EPI_ISL_858759, EPI_ISL_858760, EPI_ISL_858761, EPI_ISL_858762, EPI_ISL_858763, EPI_ISL_858764, EPI_ISL_858765, EPI_ISL_858766, EPI_ISL_858767, EPI_ISL_858768, EPI_ISL_858769, EPI_ISL_858770, EPI_ISL_858771, EPI_ISL_858772, EPI_ISL_858773, EPI_ISL_858774, EPI_ISL_858775, EPI_ISL_858776, EPI_ISL_858777, EPI_ISL_858778                                                                                                                                                                                                                                                                                                                                                                                                                                                                                                                                                                                                 |                                                                                                                                                                                                 |                                                                            |                                                                                                                                                                                                                                                                                                                                                                                                                                     |
| see above                                                                                                                                                                                                                                                                                                                                                                                                                                                                                                                                                                                                                                                                                                                                                                                                                                                                                                                                                                                                      | Lighthouse Lab in Glasgow                                                                                                                                                                       | Wellcome Sanger Institute for the COVID-19 Genomics UK (COG-UK) Consortium | Harper VanSteenhouse, Yumi Kasai, David Gray, Carol Clugston, Anna Dominiczak and Alex Alderton, Roberto Amato, Sonia Goncalves, Ewan Harrison, David K. Jackson, Ian Johnston, Dominic Kwiatkowski, Cordelia Langford, John Sillitoe on behalf of the Wellcome Sanger Institute COVID-19 Surveillance Team                                                                                                                         |
| EPI_ISL_858779, EPI_ISL_858780                                                                                                                                                                                                                                                                                                                                                                                                                                                                                                                                                                                                                                                                                                                                                                                                                                                                                                                                                                                 | Lighthouse Lab in Alderley Park                                                                                                                                                                 | Wellcome Sanger Institute for the COVID-19 Genomics UK (COG-UK) Consortium | Jacquelyn Wynn, Mairead Hyland, The Lighthouse Lab in Alderley Park and Alex Alderton, Roberto Amato, Sonia Goncalves, Ewan Harrison, David K. Jackson, Ian Johnston, Dominic Kwiatkowski, Cordelia Langford, John Sillitoe on behalf of the Wellcome Sanger Institute COVID-19 Surveillance Team                                                                                                                                   |
| EPI_ISL_858781, EPI_ISL_858782, EPI_ISL_858783                                                                                                                                                                                                                                                                                                                                                                                                                                                                                                                                                                                                                                                                                                                                                                                                                                                                                                                                                                 | Lighthouse Lab in Glasgow                                                                                                                                                                       | Wellcome Sanger Institute for the COVID-19 Genomics UK (COG-UK) Consortium | Harper VanSteenhouse, Yumi Kasai, David Gray, Carol Clugston, Anna Dominiczak and Alex Alderton, Roberto Amato, Sonia Goncalves, Ewan Harrison, David K. Jackson, Ian Johnston, Dominic Kwiatkowski, Cordelia Langford, John Sillitoe on behalf of the Wellcome Sanger Institute COVID-19 Surveillance Team                                                                                                                         |
| EPI_ISL_860642, EPI_ISL_860643, EPI_ISL_860644, EPI_ISL_860645, EPI_ISL_860646, EPI_ISL_860647, EPI_ISL_860648, EPI_ISL_860649, EPI_ISL_860650, EPI_ISL_860651, EPI_ISL_860653, EPI_ISL_860654, EPI_ISL_860655, EPI_ISL_860656, EPI_ISL_860657, EPI_ISL_860658, EPI_ISL_860659, EPI_ISL_860660, EPI_ISL_860661, EPI_ISL_860662, EPI_ISL_860663, EPI_ISL_860664, EPI_ISL_860665, EPI_ISL_860782                                                                                                                                                                                                                                                                                                                                                                                                                                                                                                                                                                                                                 |                                                                                                                                                                                                 |                                                                            |                                                                                                                                                                                                                                                                                                                                                                                                                                     |
| see above                                                                                                                                                                                                                                                                                                                                                                                                                                                                                                                                                                                                                                                                                                                                                                                                                                                                                                                                                                                                      | Respiratory Virus Unit, National Infection Service, Public Health England                                                                                                                       | COVID-19 Genomics UK (COG-UK) Consortium                                   | PHE Covid Sequencing Team                                                                                                                                                                                                                                                                                                                                                                                                           |
| EPI_ISL_863532, EPI_ISL_863590, EPI_ISL_863600, EPI_ISL_863631, EPI_ISL_863635, EPI_ISL_863639, EPI_ISL_863645, EPI_ISL_863651, EPI_ISL_863707, EPI_ISL_863721, EPI_ISL_863729, EPI_ISL_863746, EPI_ISL_863803, EPI_ISL_863811, EPI_ISL_863830, EPI_ISL_863841, EPI_ISL_863853                                                                                                                                                                                                                                                                                                                                                                                                                                                                                                                                                                                                                                                                                                                                 |                                                                                                                                                                                                 |                                                                            |                                                                                                                                                                                                                                                                                                                                                                                                                                     |
| see above                                                                                                                                                                                                                                                                                                                                                                                                                                                                                                                                                                                                                                                                                                                                                                                                                                                                                                                                                                                                      | Lighthouse Lab in Glasgow                                                                                                                                                                       | Wellcome Sanger Institute for the COVID-19 Genomics UK (COG-UK) Consortium | Harper VanSteenhouse, Yumi Kasai, David Gray, Carol Clugston, Anna Dominiczak and Alex Alderton, Roberto Amato, Sonia Goncalves, Ewan Harrison, David K. Jackson, Ian Johnston, Dominic Kwiatkowski, Cordelia Langford, John Sillitoe on behalf of the Wellcome Sanger Institute COVID-19 Surveillance Team                                                                                                                         |
| EPI_ISL_864738, EPI_ISL_864739, EPI_ISL_864740, EPI_ISL_864741, EPI_ISL_864742, EPI_ISL_864743, EPI_ISL_864744, EPI_ISL_864745, EPI_ISL_864746, EPI_ISL_864747, EPI_ISL_864749, EPI_ISL_864750, EPI_ISL_864752, EPI_ISL_864753, EPI_ISL_864757, EPI_ISL_864759, EPI_ISL_864761, EPI_ISL_864763, EPI_ISL_864765, EPI_ISL_864767, EPI_ISL_864769, EPI_ISL_864770, EPI_ISL_864772, EPI_ISL_864785, EPI_ISL_864787, EPI_ISL_864790, EPI_ISL_864795, EPI_ISL_864801, EPI_ISL_864812, EPI_ISL_864816, EPI_ISL_864817, EPI_ISL_864820, EPI_ISL_864822, EPI_ISL_864823, EPI_ISL_864824, EPI_ISL_864825, EPI_ISL_864826, EPI_ISL_864827, EPI_ISL_864830, EPI_ISL_864831, EPI_ISL_864836, EPI_ISL_864848, EPI_ISL_864853, EPI_ISL_864855, EPI_ISL_864858, EPI_ISL_864860, EPI_ISL_864869, EPI_ISL_864871, EPI_ISL_864873, EPI_ISL_864877, EPI_ISL_864879, EPI_ISL_864881, EPI_ISL_864885, EPI_ISL_864887, EPI_ISL_864891, EPI_ISL_864895, EPI_ISL_864917, EPI_ISL_864918, EPI_ISL_864925, EPI_ISL_864947, EPI_ISL_864948 |                                                                                                                                                                                                 |                                                                            |                                                                                                                                                                                                                                                                                                                                                                                                                                     |
| see above                                                                                                                                                                                                                                                                                                                                                                                                                                                                                                                                                                                                                                                                                                                                                                                                                                                                                                                                                                                                      | Department of Pathology, University of Cambridge                                                                                                                                                | COVID-19 Genomics UK (COG-UK) Consortium                                   | Aminu S. Jahun, Yasmin Chaudhry, Grant Hall, Iliana Georgana, Myra Hosmillo, Martin D. Curran, Malte Pinckert, Surendra Parmar, Ian Goodfellow                                                                                                                                                                                                                                                                                      |
| EPI_ISL_864961, EPI_ISL_864962, EPI_ISL_864963, EPI_ISL_864964, EPI_ISL_864965, EPI_ISL_864966, EPI_ISL_864967, EPI_ISL_864968, EPI_ISL_864969, EPI_ISL_864970, EPI_ISL_864971, EPI_ISL_864972, EPI_ISL_864973, EPI_ISL_864974, EPI_ISL_864975, EPI_ISL_864976, EPI_ISL_864977, EPI_ISL_864978, EPI_ISL_864979, EPI_ISL_864980, EPI_ISL_864981, EPI_ISL_864982, EPI_ISL_864983, EPI_ISL_864992, EPI_ISL_864993                                                                                                                                                                                                                                                                                                                                                                                                                                                                                                                                                                                                 |                                                                                                                                                                                                 |                                                                            |                                                                                                                                                                                                                                                                                                                                                                                                                                     |
| see above                                                                                                                                                                                                                                                                                                                                                                                                                                                                                                                                                                                                                                                                                                                                                                                                                                                                                                                                                                                                      | West of Scotland Specialist Virology Centre, NHSGGC / MRC-University of Glasgow Centre for Virus Research                                                                                       | COVID-19 Genomics UK (COG-UK) Consortium                                   | Ana da Silva Filipe, Natasha Johnson, Kathy Smollett, Daniel Mair, Stephen Carmichael, Alice Broos, Lily Tong, Jenna Nichols, Kyriaki Nomikou; Sarah McDonald; Richard Orton, Joseph Hughes, Sreenu Vattipally, David L Robertson; Alasdair MacLean, Rory Gunson; Sharif Shaaban, Matthew Holden; Rachel Blacow, Guy Mollett, Kathy Li, James Shepherd, Antonia Ho, Emma Thomson                                                    |
| EPI_ISL_865000, EPI_ISL_865001, EPI_ISL_865002, EPI_ISL_865003, EPI_ISL_865004, EPI_ISL_865005, EPI_ISL_865006, EPI_ISL_865008                                                                                                                                                                                                                                                                                                                                                                                                                                                                                                                                                                                                                                                                                                                                                                                                                                                                                 | Lighthouse Lab in Glasgow / MRC-University of Glasgow Centre for Virus Research                                                                                                                 | COVID-19 Genomics UK (COG-UK) Consortium                                   | Ana da Silva Filipe, Natasha Johnson, Kathy Smollett, Daniel Mair, Stephen Carmichael, Alice Broos, Lily Tong, Jenna Nichols, Kyriaki Nomikou; Sarah McDonald; Harper VanSteenhouse, Yumi Kasai, David Gray, Carol Clugston, Anna Dominiczak; Alasdair MacLean, Rory Gunson; Richard Orton, Joseph Hughes, Sreenu Vattipally, David L Robertson; Sharif Shaaban, Matthew Holden; Kathy Li, James Shepherd, Antonia Ho, Emma Thomson |
| EPI_ISL_865073, EPI_ISL_865079, EPI_ISL_865080, EPI_ISL_865081, EPI_ISL_865082, EPI_ISL_865083, EPI_ISL_865084, EPI_ISL_865085, EPI_ISL_865086, EPI_ISL_865087, EPI_ISL_865088                                                                                                                                                                                                                                                                                                                                                                                                                                                                                                                                                                                                                                                                                                                                                                                                                                 |                                                                                                                                                                                                 |                                                                            |                                                                                                                                                                                                                                                                                                                                                                                                                                     |
| see above                                                                                                                                                                                                                                                                                                                                                                                                                                                                                                                                                                                                                                                                                                                                                                                                                                                                                                                                                                                                      | Virology Department, Royal Infirmary of Edinburgh, NHS Lothian / School of Biological Sciences, University of Edinburgh / Institute of Genetics and Molecular Medicine, University of Edinburgh | COVID-19 Genomics UK (COG-UK) Consortium                                   | McHugh M, Dewar R, Rooke S, Gallagher M, Balcaza C, O'Toole Á, Scher E, Hill V, McCrone JT, Colquhoun R, Yu X, Jackson B, Rambaut A, Williams TC, Templeton K                                                                                                                                                                                                                                                                       |
| EPI_ISL_865177, EPI_ISL_865354, EPI_ISL_865355, EPI_ISL_865356, EPI_ISL_865357, EPI_ISL_865358, EPI_ISL_865359, EPI_ISL_865360, EPI_ISL_865361, EPI_ISL_865362, EPI_ISL_865363, EPI_ISL_865364, EPI_ISL_865367, EPI_ISL_865368, EPI_ISL_865371, EPI_ISL_865372, EPI_ISL_865373, EPI_ISL_865374, EPI_ISL_865375, EPI_ISL_865376, EPI_ISL_865377, EPI_ISL_865378, EPI_ISL_865379, EPI_ISL_865380, EPI_ISL_865381, EPI_ISL_865382, EPI_ISL_865386, EPI_ISL_865389, EPI_ISL_865398, EPI_ISL_865405                                                                                                                                                                                                                                                                                                                                                                                                                                                                                                                 |                                                                                                                                                                                                 |                                                                            |                                                                                                                                                                                                                                                                                                                                                                                                                                     |
| see above                                                                                                                                                                                                                                                                                                                                                                                                                                                                                                                                                                                                                                                                                                                                                                                                                                                                                                                                                                                                      | Liverpool Clinical Laboratories                                                                                                                                                                 | COVID-19 Genomics UK (COG-UK) Consortium                                   | Sam Haldenby, Anita Lucaci, Steve Paterson, Julian Hiscox, Alistair Darby, M Almsaud, A Alrezaihi, Muhannad Alruwaili, Stuart D Armstrong, Jones Benjamin, Eleanor G Bentley, Anu Chawla, Jordan J Clark, Angela Cowell, Richard Eccles, Isabel Garcia-Dorival, Matthew Gemmell, Alessandro Gerada,                                                                                                                                 |

|                                                                                                                                                                                                                                                                                                                                                                                                                                                                                                                                                                                                                                                                                                                                                                                                                                                                                                                                                                                                                                                                                                                                                                                                                                                                                                                                                                                                                                                                                                                                                                                                                                                                                                                                                                                                                                                                                                                                                                                                                                                                                                                                                                                                                                                                                                                                                                                                                                                                                                                                                                                                                                                                                                                                                                                                                                                                                                                                                                                                                                                                                                                                                                                                                                                                                                                                                                                                                                                                                                                                                                                                                                                                                                                                                                                                                                                                                                                                                                                                                                                                                                                                                                                                                                                                                                                                                                                |                                                                                                                                                                                                                     |                                                                           |                                                                                                                                                                                                                                                                                                                                                                                                                                                          |
|--------------------------------------------------------------------------------------------------------------------------------------------------------------------------------------------------------------------------------------------------------------------------------------------------------------------------------------------------------------------------------------------------------------------------------------------------------------------------------------------------------------------------------------------------------------------------------------------------------------------------------------------------------------------------------------------------------------------------------------------------------------------------------------------------------------------------------------------------------------------------------------------------------------------------------------------------------------------------------------------------------------------------------------------------------------------------------------------------------------------------------------------------------------------------------------------------------------------------------------------------------------------------------------------------------------------------------------------------------------------------------------------------------------------------------------------------------------------------------------------------------------------------------------------------------------------------------------------------------------------------------------------------------------------------------------------------------------------------------------------------------------------------------------------------------------------------------------------------------------------------------------------------------------------------------------------------------------------------------------------------------------------------------------------------------------------------------------------------------------------------------------------------------------------------------------------------------------------------------------------------------------------------------------------------------------------------------------------------------------------------------------------------------------------------------------------------------------------------------------------------------------------------------------------------------------------------------------------------------------------------------------------------------------------------------------------------------------------------------------------------------------------------------------------------------------------------------------------------------------------------------------------------------------------------------------------------------------------------------------------------------------------------------------------------------------------------------------------------------------------------------------------------------------------------------------------------------------------------------------------------------------------------------------------------------------------------------------------------------------------------------------------------------------------------------------------------------------------------------------------------------------------------------------------------------------------------------------------------------------------------------------------------------------------------------------------------------------------------------------------------------------------------------------------------------------------------------------------------------------------------------------------------------------------------------------------------------------------------------------------------------------------------------------------------------------------------------------------------------------------------------------------------------------------------------------------------------------------------------------------------------------------------------------------------------------------------------------------------------------------------------|---------------------------------------------------------------------------------------------------------------------------------------------------------------------------------------------------------------------|---------------------------------------------------------------------------|----------------------------------------------------------------------------------------------------------------------------------------------------------------------------------------------------------------------------------------------------------------------------------------------------------------------------------------------------------------------------------------------------------------------------------------------------------|
| <p>PKF Gilmore, Richard Gregory, Ximeng Han, Catherine Hartley, Margaret Hughes, Miren Iturriza-Gomara, James Johnson, L Luu, Jenifer Manson, Charlotte Nelson, Elaine O'Toole, Cassie Olateju, Rebekah Penrice-Randal, Lucille Rainbow, N.P Randle, Trevor Ian Robinson, Parul Sharma, Ghada T Shawli, James P Stewart, Neil Swainston, Ecaterina Varnos, Joanne Watts, Mark Whitehead</p>                                                                                                                                                                                                                                                                                                                                                                                                                                                                                                                                                                                                                                                                                                                                                                                                                                                                                                                                                                                                                                                                                                                                                                                                                                                                                                                                                                                                                                                                                                                                                                                                                                                                                                                                                                                                                                                                                                                                                                                                                                                                                                                                                                                                                                                                                                                                                                                                                                                                                                                                                                                                                                                                                                                                                                                                                                                                                                                                                                                                                                                                                                                                                                                                                                                                                                                                                                                                                                                                                                                                                                                                                                                                                                                                                                                                                                                                                                                                                                                    |                                                                                                                                                                                                                     |                                                                           |                                                                                                                                                                                                                                                                                                                                                                                                                                                          |
| EPI_ISL_865489, EPI_ISL_865496, EPI_ISL_865497, EPI_ISL_865498, EPI_ISL_865501, EPI_ISL_865502, EPI_ISL_865516, EPI_ISL_865517, EPI_ISL_865518, EPI_ISL_865519, EPI_ISL_865520, EPI_ISL_865521, EPI_ISL_865522, EPI_ISL_865523, EPI_ISL_865524, EPI_ISL_865525, EPI_ISL_865526, EPI_ISL_865527, EPI_ISL_865528, EPI_ISL_865529, EPI_ISL_865530, EPI_ISL_865531, EPI_ISL_865532, EPI_ISL_865533, EPI_ISL_865534, EPI_ISL_865535, EPI_ISL_865536, EPI_ISL_865537, EPI_ISL_865538, EPI_ISL_865539, EPI_ISL_865541, EPI_ISL_865542, EPI_ISL_865543, EPI_ISL_865544, EPI_ISL_865545, EPI_ISL_865546, EPI_ISL_865547, EPI_ISL_865548, EPI_ISL_865549, EPI_ISL_865550, EPI_ISL_865551, EPI_ISL_865552, EPI_ISL_865553, EPI_ISL_865554, EPI_ISL_865555, EPI_ISL_865556, EPI_ISL_865557, EPI_ISL_865558, EPI_ISL_865561, EPI_ISL_865562, EPI_ISL_865564, EPI_ISL_865567, EPI_ISL_865568, EPI_ISL_865569, EPI_ISL_865570, EPI_ISL_865572, EPI_ISL_865573, EPI_ISL_865579, EPI_ISL_865580, EPI_ISL_865581, EPI_ISL_865582, EPI_ISL_865583                                                                                                                                                                                                                                                                                                                                                                                                                                                                                                                                                                                                                                                                                                                                                                                                                                                                                                                                                                                                                                                                                                                                                                                                                                                                                                                                                                                                                                                                                                                                                                                                                                                                                                                                                                                                                                                                                                                                                                                                                                                                                                                                                                                                                                                                                                                                                                                                                                                                                                                                                                                                                                                                                                                                                                                                                                                                                                                                                                                                                                                                                                                                                                                                                                                                                                                                                 | see above                                                                                                                                                                                                           |                                                                           |                                                                                                                                                                                                                                                                                                                                                                                                                                                          |
|                                                                                                                                                                                                                                                                                                                                                                                                                                                                                                                                                                                                                                                                                                                                                                                                                                                                                                                                                                                                                                                                                                                                                                                                                                                                                                                                                                                                                                                                                                                                                                                                                                                                                                                                                                                                                                                                                                                                                                                                                                                                                                                                                                                                                                                                                                                                                                                                                                                                                                                                                                                                                                                                                                                                                                                                                                                                                                                                                                                                                                                                                                                                                                                                                                                                                                                                                                                                                                                                                                                                                                                                                                                                                                                                                                                                                                                                                                                                                                                                                                                                                                                                                                                                                                                                                                                                                                                | Barts Health NHS Trust                                                                                                                                                                                              | COVID-19 Genomics UK (COG-UK) Consortium                                  | CUTINO-MOGUEL, Maria-Teresa; HARRINGTON, David; OWOYEMI, Dola; KULASEGARAN-SHYLINI, Raghavendran; BROAD, Claire; KELE, Beatrix                                                                                                                                                                                                                                                                                                                           |
| EPI_ISL_865682, EPI_ISL_865689, EPI_ISL_865691, EPI_ISL_865692, EPI_ISL_865693, EPI_ISL_865694, EPI_ISL_865806, EPI_ISL_865807, EPI_ISL_865809, EPI_ISL_865810, EPI_ISL_865811, EPI_ISL_865812, EPI_ISL_865813, EPI_ISL_865814, EPI_ISL_865816, EPI_ISL_865817, EPI_ISL_865818, EPI_ISL_865819, EPI_ISL_865820, EPI_ISL_865821, EPI_ISL_865822, EPI_ISL_865823, EPI_ISL_865824, EPI_ISL_865825, EPI_ISL_865826, EPI_ISL_865827, EPI_ISL_865828, EPI_ISL_865829, EPI_ISL_865830, EPI_ISL_865831, EPI_ISL_865832, EPI_ISL_865833, EPI_ISL_865834, EPI_ISL_865835, EPI_ISL_865836, EPI_ISL_865837, EPI_ISL_865838, EPI_ISL_865839, EPI_ISL_865840, EPI_ISL_865841, EPI_ISL_865842, EPI_ISL_865843, EPI_ISL_865844, EPI_ISL_865845, EPI_ISL_865846                                                                                                                                                                                                                                                                                                                                                                                                                                                                                                                                                                                                                                                                                                                                                                                                                                                                                                                                                                                                                                                                                                                                                                                                                                                                                                                                                                                                                                                                                                                                                                                                                                                                                                                                                                                                                                                                                                                                                                                                                                                                                                                                                                                                                                                                                                                                                                                                                                                                                                                                                                                                                                                                                                                                                                                                                                                                                                                                                                                                                                                                                                                                                                                                                                                                                                                                                                                                                                                                                                                                                                                                                                 | see above                                                                                                                                                                                                           |                                                                           |                                                                                                                                                                                                                                                                                                                                                                                                                                                          |
|                                                                                                                                                                                                                                                                                                                                                                                                                                                                                                                                                                                                                                                                                                                                                                                                                                                                                                                                                                                                                                                                                                                                                                                                                                                                                                                                                                                                                                                                                                                                                                                                                                                                                                                                                                                                                                                                                                                                                                                                                                                                                                                                                                                                                                                                                                                                                                                                                                                                                                                                                                                                                                                                                                                                                                                                                                                                                                                                                                                                                                                                                                                                                                                                                                                                                                                                                                                                                                                                                                                                                                                                                                                                                                                                                                                                                                                                                                                                                                                                                                                                                                                                                                                                                                                                                                                                                                                | University College London, Great Ormond Street Hospital for Children NHS Foundation Trust, Imperial College Healthcare NHS Trust                                                                                    | COVID-19 Genomics UK (COG-UK) Consortium                                  | Sergi Castellano, Rachel Williams, Mark Kristiansen, Paola Resende Silva, Sunando Roy, Tony Brooks, Helena Tullis, Paola Niola, Patricia Dyal, Charlotte Williams, Leysa Forrest, Yasmin Panchbhaya, Jacqueline Findlay, Samuel Weeks, Julian Brown, Kathryn Pannock, Kathryn Pannock, Paul Randell, James Price, Alison Holmes, Judith Breuer                                                                                                           |
| EPI_ISL_866071, EPI_ISL_866072, EPI_ISL_866073, EPI_ISL_866074, EPI_ISL_866115, EPI_ISL_866122, EPI_ISL_866127, EPI_ISL_866135, EPI_ISL_866140, EPI_ISL_866162, EPI_ISL_866168                                                                                                                                                                                                                                                                                                                                                                                                                                                                                                                                                                                                                                                                                                                                                                                                                                                                                                                                                                                                                                                                                                                                                                                                                                                                                                                                                                                                                                                                                                                                                                                                                                                                                                                                                                                                                                                                                                                                                                                                                                                                                                                                                                                                                                                                                                                                                                                                                                                                                                                                                                                                                                                                                                                                                                                                                                                                                                                                                                                                                                                                                                                                                                                                                                                                                                                                                                                                                                                                                                                                                                                                                                                                                                                                                                                                                                                                                                                                                                                                                                                                                                                                                                                                 | see above                                                                                                                                                                                                           |                                                                           |                                                                                                                                                                                                                                                                                                                                                                                                                                                          |
|                                                                                                                                                                                                                                                                                                                                                                                                                                                                                                                                                                                                                                                                                                                                                                                                                                                                                                                                                                                                                                                                                                                                                                                                                                                                                                                                                                                                                                                                                                                                                                                                                                                                                                                                                                                                                                                                                                                                                                                                                                                                                                                                                                                                                                                                                                                                                                                                                                                                                                                                                                                                                                                                                                                                                                                                                                                                                                                                                                                                                                                                                                                                                                                                                                                                                                                                                                                                                                                                                                                                                                                                                                                                                                                                                                                                                                                                                                                                                                                                                                                                                                                                                                                                                                                                                                                                                                                | University College London Hospital                                                                                                                                                                                  | COVID-19 Genomics UK (COG-UK) Consortium                                  | Judith Heaney, Matthew Byott, Catherine Houlihan, Dan Frampton, Stuart Kirk, Moira Spyer and Eleni Nastouli                                                                                                                                                                                                                                                                                                                                              |
| EPI_ISL_866346, EPI_ISL_866347, EPI_ISL_866348, EPI_ISL_866349, EPI_ISL_866350, EPI_ISL_866351, EPI_ISL_866352, EPI_ISL_866364, EPI_ISL_866365, EPI_ISL_866372                                                                                                                                                                                                                                                                                                                                                                                                                                                                                                                                                                                                                                                                                                                                                                                                                                                                                                                                                                                                                                                                                                                                                                                                                                                                                                                                                                                                                                                                                                                                                                                                                                                                                                                                                                                                                                                                                                                                                                                                                                                                                                                                                                                                                                                                                                                                                                                                                                                                                                                                                                                                                                                                                                                                                                                                                                                                                                                                                                                                                                                                                                                                                                                                                                                                                                                                                                                                                                                                                                                                                                                                                                                                                                                                                                                                                                                                                                                                                                                                                                                                                                                                                                                                                 | Regional Virus Laboratory, Belfast Health and Social Care Trust                                                                                                                                                     |                                                                           | Conall McCaughey, James McKenna, Tanya Curran, Susan Feeney, Alison Watt, Ciara Cox, Mairead Connor, Zoltan Molnar, David Simpson, Derek Fairley                                                                                                                                                                                                                                                                                                         |
| EPI_ISL_866486, EPI_ISL_866487, EPI_ISL_866488, EPI_ISL_866489, EPI_ISL_866490, EPI_ISL_866491, EPI_ISL_866492, EPI_ISL_866493, EPI_ISL_866494, EPI_ISL_866495, EPI_ISL_866496, EPI_ISL_866497, EPI_ISL_866498, EPI_ISL_866499, EPI_ISL_866500, EPI_ISL_866501, EPI_ISL_866502, EPI_ISL_866503, EPI_ISL_866504, EPI_ISL_866505, EPI_ISL_866506, EPI_ISL_866507, EPI_ISL_866508, EPI_ISL_866509, EPI_ISL_866510, EPI_ISL_866511, EPI_ISL_866512, EPI_ISL_866513, EPI_ISL_866514, EPI_ISL_866515, EPI_ISL_866516, EPI_ISL_866517, EPI_ISL_866518, EPI_ISL_866519, EPI_ISL_866520, EPI_ISL_866521, EPI_ISL_866522, EPI_ISL_866523, EPI_ISL_866524, EPI_ISL_866525, EPI_ISL_866526, EPI_ISL_866535                                                                                                                                                                                                                                                                                                                                                                                                                                                                                                                                                                                                                                                                                                                                                                                                                                                                                                                                                                                                                                                                                                                                                                                                                                                                                                                                                                                                                                                                                                                                                                                                                                                                                                                                                                                                                                                                                                                                                                                                                                                                                                                                                                                                                                                                                                                                                                                                                                                                                                                                                                                                                                                                                                                                                                                                                                                                                                                                                                                                                                                                                                                                                                                                                                                                                                                                                                                                                                                                                                                                                                                                                                                                                 | see above                                                                                                                                                                                                           |                                                                           |                                                                                                                                                                                                                                                                                                                                                                                                                                                          |
|                                                                                                                                                                                                                                                                                                                                                                                                                                                                                                                                                                                                                                                                                                                                                                                                                                                                                                                                                                                                                                                                                                                                                                                                                                                                                                                                                                                                                                                                                                                                                                                                                                                                                                                                                                                                                                                                                                                                                                                                                                                                                                                                                                                                                                                                                                                                                                                                                                                                                                                                                                                                                                                                                                                                                                                                                                                                                                                                                                                                                                                                                                                                                                                                                                                                                                                                                                                                                                                                                                                                                                                                                                                                                                                                                                                                                                                                                                                                                                                                                                                                                                                                                                                                                                                                                                                                                                                | Northumbria University / South Tees Hospitals NHS Foundation Trust / North Cumbria Integrated Care NHS Foundation Trust / North Tees and Hartlepool NHS Foundation Trust / Newcastle Hospitals NHS Foundation Trust | COVID-19 Genomics UK (COG-UK) Consortium                                  | Darren L Smith, Andrew Nelson, Matthew Bashton, Greg R Young, Joshua Loh, John Allan, Mohammad A Tariq, Giles S Holt, Gary Black, Wen C Yew, Lynn Dover, Paul Baker, Steve Liggett, Sarah Essex, Jane Greenaway, Debra Padgett, Clive Graham, Garren Scott, Edward Barton, Emma Swindells, Brendan Payne, Jennifer Collins, Yusrri Taha, Gary Eltringham                                                                                                 |
| EPI_ISL_866601                                                                                                                                                                                                                                                                                                                                                                                                                                                                                                                                                                                                                                                                                                                                                                                                                                                                                                                                                                                                                                                                                                                                                                                                                                                                                                                                                                                                                                                                                                                                                                                                                                                                                                                                                                                                                                                                                                                                                                                                                                                                                                                                                                                                                                                                                                                                                                                                                                                                                                                                                                                                                                                                                                                                                                                                                                                                                                                                                                                                                                                                                                                                                                                                                                                                                                                                                                                                                                                                                                                                                                                                                                                                                                                                                                                                                                                                                                                                                                                                                                                                                                                                                                                                                                                                                                                                                                 | Quadram Institute Bioscience                                                                                                                                                                                        |                                                                           | Dave J. Baker, Gemma L. Kay, Al Aydin, Thanh Le-Viet, Steven Rudder, Ana P. Tedim, Anastasia Kolyva, Maria Diaz, Leonardo de Oliveira Martins, Nabil-Fareed Alikhan, Lizzie Meadows, Rachael Stanley, Ngozi Elumogo, Muhammed Yasir, Nicholas M. Thomson, Alexander J Trotter, Rachel Gilroy, Samuel Bloomfield, Claire Stuart, Andrew Bell, Reenesh Prakash, Samir Dervisevic, Alison E. Mather, John Wain, Mark Webber, Andrew J. Page, Justin O'Grady |
| EPI_ISL_866905                                                                                                                                                                                                                                                                                                                                                                                                                                                                                                                                                                                                                                                                                                                                                                                                                                                                                                                                                                                                                                                                                                                                                                                                                                                                                                                                                                                                                                                                                                                                                                                                                                                                                                                                                                                                                                                                                                                                                                                                                                                                                                                                                                                                                                                                                                                                                                                                                                                                                                                                                                                                                                                                                                                                                                                                                                                                                                                                                                                                                                                                                                                                                                                                                                                                                                                                                                                                                                                                                                                                                                                                                                                                                                                                                                                                                                                                                                                                                                                                                                                                                                                                                                                                                                                                                                                                                                 | Queens Medical Centre, Clinical Microbiology Department / DeepSeq Nottingham                                                                                                                                        |                                                                           | Gemma Clark, Wendy Smith, Manjinder Khakh, Vicki M Fleming, Michelle M Lister, Hannah Howson-Wells, Jonathan Ball, Patrick McClure, Joseph Chappell, Theocharis Tsoleiridis, Nadine Holmes, Matthew Carlisle, Christopher Moore, Fei Sang, Johnny Debebe, Victoria Wright, Matthew Loose                                                                                                                                                                 |
| EPI_ISL_866992, EPI_ISL_866993, EPI_ISL_866994, EPI_ISL_866995, EPI_ISL_866996, EPI_ISL_866997, EPI_ISL_866998, EPI_ISL_866999, EPI_ISL_867000, EPI_ISL_867001, EPI_ISL_867002, EPI_ISL_867003, EPI_ISL_867004, EPI_ISL_867005, EPI_ISL_867006, EPI_ISL_867007, EPI_ISL_867008, EPI_ISL_867009, EPI_ISL_867010, EPI_ISL_867011, EPI_ISL_867012, EPI_ISL_867013, EPI_ISL_867014, EPI_ISL_867015, EPI_ISL_867016, EPI_ISL_867017                                                                                                                                                                                                                                                                                                                                                                                                                                                                                                                                                                                                                                                                                                                                                                                                                                                                                                                                                                                                                                                                                                                                                                                                                                                                                                                                                                                                                                                                                                                                                                                                                                                                                                                                                                                                                                                                                                                                                                                                                                                                                                                                                                                                                                                                                                                                                                                                                                                                                                                                                                                                                                                                                                                                                                                                                                                                                                                                                                                                                                                                                                                                                                                                                                                                                                                                                                                                                                                                                                                                                                                                                                                                                                                                                                                                                                                                                                                                                 | see above                                                                                                                                                                                                           |                                                                           |                                                                                                                                                                                                                                                                                                                                                                                                                                                          |
|                                                                                                                                                                                                                                                                                                                                                                                                                                                                                                                                                                                                                                                                                                                                                                                                                                                                                                                                                                                                                                                                                                                                                                                                                                                                                                                                                                                                                                                                                                                                                                                                                                                                                                                                                                                                                                                                                                                                                                                                                                                                                                                                                                                                                                                                                                                                                                                                                                                                                                                                                                                                                                                                                                                                                                                                                                                                                                                                                                                                                                                                                                                                                                                                                                                                                                                                                                                                                                                                                                                                                                                                                                                                                                                                                                                                                                                                                                                                                                                                                                                                                                                                                                                                                                                                                                                                                                                | Lincolnshire Hospitals and DeepSeq Nottingham                                                                                                                                                                       | COVID-19 Genomics UK (COG-UK) Consortium                                  | Nichola Duckworth, Tim Sloan, Sarah Walsh, Jonathan Ball, Patrick McClure, Joseph Chappell, Nadine Holmes, Matthew Carlisle, Christopher Moore, Fei Sang, Johnny Debebe, Victoria Wright, Matthew Loose                                                                                                                                                                                                                                                  |
| EPI_ISL_867038, EPI_ISL_867039, EPI_ISL_867040, EPI_ISL_867041, EPI_ISL_867044, EPI_ISL_867045, EPI_ISL_867046, EPI_ISL_867047, EPI_ISL_867048, EPI_ISL_867049, EPI_ISL_867050, EPI_ISL_867052, EPI_ISL_867053, EPI_ISL_867054, EPI_ISL_867055, EPI_ISL_867056, EPI_ISL_867057, EPI_ISL_867058, EPI_ISL_867059, EPI_ISL_867060, EPI_ISL_867061, EPI_ISL_867062, EPI_ISL_867063, EPI_ISL_867064, EPI_ISL_867065, EPI_ISL_867066, EPI_ISL_867067, EPI_ISL_867068, EPI_ISL_867069, EPI_ISL_867071, EPI_ISL_867073, EPI_ISL_867074, EPI_ISL_867075, EPI_ISL_867076, EPI_ISL_867077, EPI_ISL_867078, EPI_ISL_867079, EPI_ISL_867080, EPI_ISL_867081, EPI_ISL_867082, EPI_ISL_867084, EPI_ISL_867087, EPI_ISL_867088, EPI_ISL_867089, EPI_ISL_867090, EPI_ISL_867093, EPI_ISL_867094, EPI_ISL_867095, EPI_ISL_867096, EPI_ISL_867097, EPI_ISL_867098, EPI_ISL_867130, EPI_ISL_867155, EPI_ISL_867159, EPI_ISL_867161, EPI_ISL_867162, EPI_ISL_867169, EPI_ISL_867170, EPI_ISL_867171, EPI_ISL_867181                                                                                                                                                                                                                                                                                                                                                                                                                                                                                                                                                                                                                                                                                                                                                                                                                                                                                                                                                                                                                                                                                                                                                                                                                                                                                                                                                                                                                                                                                                                                                                                                                                                                                                                                                                                                                                                                                                                                                                                                                                                                                                                                                                                                                                                                                                                                                                                                                                                                                                                                                                                                                                                                                                                                                                                                                                                                                                                                                                                                                                                                                                                                                                                                                                                                                                                                                                                 | see above                                                                                                                                                                                                           |                                                                           |                                                                                                                                                                                                                                                                                                                                                                                                                                                          |
|                                                                                                                                                                                                                                                                                                                                                                                                                                                                                                                                                                                                                                                                                                                                                                                                                                                                                                                                                                                                                                                                                                                                                                                                                                                                                                                                                                                                                                                                                                                                                                                                                                                                                                                                                                                                                                                                                                                                                                                                                                                                                                                                                                                                                                                                                                                                                                                                                                                                                                                                                                                                                                                                                                                                                                                                                                                                                                                                                                                                                                                                                                                                                                                                                                                                                                                                                                                                                                                                                                                                                                                                                                                                                                                                                                                                                                                                                                                                                                                                                                                                                                                                                                                                                                                                                                                                                                                | Oxford Viromics, NDM, University of Oxford; Oxford University Hospitals; Basingstoke and North Hampshire Hospital                                                                                                   | COVID-19 Genomics UK (COG-UK) Consortium                                  | Tanya Golubchik, David Bonsall, George Macintyre, Amy Trebes, Mariateresa de Cesare, Catrin Moore, Alex Mobbs, Anita Justice, Robert Shaw, Monique Andersson, Timothy Peto, Emma Wise, Nathan Moore, Jessica Lynch, Nick Cortes, Matilde Mori, Stephen Kidd, David Buck, John Todd, Christophe Fraser                                                                                                                                                    |
| EPI_ISL_867216, EPI_ISL_867217, EPI_ISL_867218, EPI_ISL_867431, EPI_ISL_867437, EPI_ISL_867438, EPI_ISL_867439, EPI_ISL_867440, EPI_ISL_867441, EPI_ISL_867442, EPI_ISL_867443, EPI_ISL_867486                                                                                                                                                                                                                                                                                                                                                                                                                                                                                                                                                                                                                                                                                                                                                                                                                                                                                                                                                                                                                                                                                                                                                                                                                                                                                                                                                                                                                                                                                                                                                                                                                                                                                                                                                                                                                                                                                                                                                                                                                                                                                                                                                                                                                                                                                                                                                                                                                                                                                                                                                                                                                                                                                                                                                                                                                                                                                                                                                                                                                                                                                                                                                                                                                                                                                                                                                                                                                                                                                                                                                                                                                                                                                                                                                                                                                                                                                                                                                                                                                                                                                                                                                                                 | see above                                                                                                                                                                                                           |                                                                           |                                                                                                                                                                                                                                                                                                                                                                                                                                                          |
|                                                                                                                                                                                                                                                                                                                                                                                                                                                                                                                                                                                                                                                                                                                                                                                                                                                                                                                                                                                                                                                                                                                                                                                                                                                                                                                                                                                                                                                                                                                                                                                                                                                                                                                                                                                                                                                                                                                                                                                                                                                                                                                                                                                                                                                                                                                                                                                                                                                                                                                                                                                                                                                                                                                                                                                                                                                                                                                                                                                                                                                                                                                                                                                                                                                                                                                                                                                                                                                                                                                                                                                                                                                                                                                                                                                                                                                                                                                                                                                                                                                                                                                                                                                                                                                                                                                                                                                | Originating lab: Wales Specialist Virology Centre Sequencing lab: Pathogen Genomics Unit                                                                                                                            | Public Health Wales Microbiology Cardiff Wales Specialist Virology Centre | Catherine Moore, Johnathan Evans, Laura Gifford, Malorie Perry, Simon Cottrell, Angela Marchbank, Alec Birchley, Alexander Adams, Amy Gaskin, Bree Gaica-Wilcox, Jason Coombes, Joel Southgate, Lauren Gilbert, Lee Graham, Nicole Pacchianni, Sara Kumziene-Summerhayes, Sarah Taylor, Sophie Jones, Sara Rey, Matthew Bull, Joanne Watkins, Sally Corden, Tom Connor                                                                                   |
| EPI_ISL_867982, EPI_ISL_867983, EPI_ISL_867985, EPI_ISL_867986, EPI_ISL_867987, EPI_ISL_867988, EPI_ISL_867989, EPI_ISL_867991, EPI_ISL_867992, EPI_ISL_867994, EPI_ISL_867995, EPI_ISL_867996, EPI_ISL_867997, EPI_ISL_867998, EPI_ISL_868000, EPI_ISL_868002, EPI_ISL_868003, EPI_ISL_868004, EPI_ISL_868005, EPI_ISL_868006, EPI_ISL_868007, EPI_ISL_868009, EPI_ISL_868010, EPI_ISL_868011, EPI_ISL_868012, EPI_ISL_868013, EPI_ISL_868014, EPI_ISL_868015, EPI_ISL_868017, EPI_ISL_868018, EPI_ISL_868019, EPI_ISL_868020, EPI_ISL_868021, EPI_ISL_868022, EPI_ISL_868024, EPI_ISL_868025, EPI_ISL_868026, EPI_ISL_868027, EPI_ISL_868028, EPI_ISL_868029, EPI_ISL_868030, EPI_ISL_868031, EPI_ISL_868032, EPI_ISL_868033, EPI_ISL_868035, EPI_ISL_868036, EPI_ISL_868037, EPI_ISL_868038, EPI_ISL_868039, EPI_ISL_868040, EPI_ISL_868041, EPI_ISL_868042, EPI_ISL_868043, EPI_ISL_868044, EPI_ISL_868046, EPI_ISL_868047, EPI_ISL_868048, EPI_ISL_868049, EPI_ISL_868050, EPI_ISL_868051, EPI_ISL_868052, EPI_ISL_868053, EPI_ISL_868054, EPI_ISL_868055, EPI_ISL_868056, EPI_ISL_868057, EPI_ISL_868058, EPI_ISL_868059, EPI_ISL_868060, EPI_ISL_868061, EPI_ISL_868062, EPI_ISL_868063, EPI_ISL_868064, EPI_ISL_868066, EPI_ISL_868067, EPI_ISL_868068, EPI_ISL_868069, EPI_ISL_868070, EPI_ISL_868071, EPI_ISL_868072, EPI_ISL_868073, EPI_ISL_868074, EPI_ISL_868076, EPI_ISL_868077, EPI_ISL_868078, EPI_ISL_868079, EPI_ISL_868080, EPI_ISL_868082, EPI_ISL_868083, EPI_ISL_868084, EPI_ISL_868085, EPI_ISL_868086, EPI_ISL_868087, EPI_ISL_868088, EPI_ISL_868089, EPI_ISL_868090, EPI_ISL_868091, EPI_ISL_868092, EPI_ISL_868093, EPI_ISL_868094, EPI_ISL_868095, EPI_ISL_868096, EPI_ISL_868097, EPI_ISL_868098, EPI_ISL_868099, EPI_ISL_868100, EPI_ISL_868101, EPI_ISL_868103, EPI_ISL_868104, EPI_ISL_868105, EPI_ISL_868106, EPI_ISL_868107, EPI_ISL_868108, EPI_ISL_868109, EPI_ISL_868110, EPI_ISL_868111, EPI_ISL_868112, EPI_ISL_868113, EPI_ISL_868114, EPI_ISL_868115, EPI_ISL_868117, EPI_ISL_868118, EPI_ISL_868119, EPI_ISL_868120, EPI_ISL_868121, EPI_ISL_868122, EPI_ISL_868123, EPI_ISL_868124, EPI_ISL_868125, EPI_ISL_868126, EPI_ISL_868127, EPI_ISL_868128, EPI_ISL_868129, EPI_ISL_868130, EPI_ISL_868131, EPI_ISL_868132, EPI_ISL_868133, EPI_ISL_868134, EPI_ISL_868135, EPI_ISL_868136, EPI_ISL_868137, EPI_ISL_868138, EPI_ISL_868139, EPI_ISL_868140, EPI_ISL_868259, EPI_ISL_868260, EPI_ISL_868261, EPI_ISL_868262, EPI_ISL_868263, EPI_ISL_868264, EPI_ISL_868265, EPI_ISL_868266, EPI_ISL_868267, EPI_ISL_868268, EPI_ISL_868269, EPI_ISL_868270, EPI_ISL_868271, EPI_ISL_868272, EPI_ISL_868273, EPI_ISL_868274, EPI_ISL_868275, EPI_ISL_868276, EPI_ISL_868277, EPI_ISL_868278, EPI_ISL_868279, EPI_ISL_868281, EPI_ISL_868282, EPI_ISL_868283, EPI_ISL_868284, EPI_ISL_868285, EPI_ISL_868286, EPI_ISL_868287, EPI_ISL_868288, EPI_ISL_868289, EPI_ISL_868291, EPI_ISL_868292, EPI_ISL_868293, EPI_ISL_868294, EPI_ISL_868295, EPI_ISL_868296, EPI_ISL_868297, EPI_ISL_868298, EPI_ISL_868299, EPI_ISL_868300, EPI_ISL_868301, EPI_ISL_868302, EPI_ISL_868303, EPI_ISL_868304, EPI_ISL_868305, EPI_ISL_868306, EPI_ISL_868307, EPI_ISL_868308, EPI_ISL_868318, EPI_ISL_868320                                                                                                                                                                                                                                                                                                                                                                                                                                                                                                                                                                                                                                                                                                                                                                                                                                                                                                                                                                                                                                                                                                                                                 | see above                                                                                                                                                                                                           |                                                                           |                                                                                                                                                                                                                                                                                                                                                                                                                                                          |
|                                                                                                                                                                                                                                                                                                                                                                                                                                                                                                                                                                                                                                                                                                                                                                                                                                                                                                                                                                                                                                                                                                                                                                                                                                                                                                                                                                                                                                                                                                                                                                                                                                                                                                                                                                                                                                                                                                                                                                                                                                                                                                                                                                                                                                                                                                                                                                                                                                                                                                                                                                                                                                                                                                                                                                                                                                                                                                                                                                                                                                                                                                                                                                                                                                                                                                                                                                                                                                                                                                                                                                                                                                                                                                                                                                                                                                                                                                                                                                                                                                                                                                                                                                                                                                                                                                                                                                                | Centre for Enzyme Innovation, University of Portsmouth / Translational Research Laboratory, Portsmouth Hospitals NHS Trust                                                                                          | COVID-19 Genomics UK (COG-UK) Consortium                                  | Angela Beckett, Yann Bourgeois, Garry Scarlett, Sharon Glayshear, Scott Elliott, Kelly Bicknell, Robert Impey, Allyson Lloyd, Sarah Wyllie, Ethan Butcher, Anoop Chauhan, Samuel Robson                                                                                                                                                                                                                                                                  |
| EPI_ISL_868372, EPI_ISL_868420, EPI_ISL_868423, EPI_ISL_868485, EPI_ISL_868559, EPI_ISL_868570, EPI_ISL_868576, EPI_ISL_868629                                                                                                                                                                                                                                                                                                                                                                                                                                                                                                                                                                                                                                                                                                                                                                                                                                                                                                                                                                                                                                                                                                                                                                                                                                                                                                                                                                                                                                                                                                                                                                                                                                                                                                                                                                                                                                                                                                                                                                                                                                                                                                                                                                                                                                                                                                                                                                                                                                                                                                                                                                                                                                                                                                                                                                                                                                                                                                                                                                                                                                                                                                                                                                                                                                                                                                                                                                                                                                                                                                                                                                                                                                                                                                                                                                                                                                                                                                                                                                                                                                                                                                                                                                                                                                                 | Virology Department, Sheffield Teaching Hospitals NHS Foundation Trust/Department of Infection, Immunity and Cardiovascular Disease, The Medical School, University of Sheffield                                    |                                                                           | Thushan de Silva, Matthew Parker, Nikki Smith, Adri Angyal, Rebecca Brown, Luke Green, Rachel Tucker, Paul Parsons, Danielle Groves, Katie Johnson, Laura Carrilero, Alex Keeley, Dave Partridge, Matthew Wyles, Benjamin Lindsey, Mehmet Yavuz, Mohammad Raza, Cariad Evans                                                                                                                                                                             |
| EPI_ISL_868716, EPI_ISL_868717, EPI_ISL_868718, EPI_ISL_868719, EPI_ISL_868720, EPI_ISL_868721, EPI_ISL_868722, EPI_ISL_868723, EPI_ISL_868724, EPI_ISL_868725, EPI_ISL_868726, EPI_ISL_868727, EPI_ISL_868728, EPI_ISL_868729, EPI_ISL_868730, EPI_ISL_868731, EPI_ISL_868732, EPI_ISL_868733, EPI_ISL_868734, EPI_ISL_868735, EPI_ISL_868736, EPI_ISL_868737, EPI_ISL_868738, EPI_ISL_868739, EPI_ISL_868740, EPI_ISL_868741, EPI_ISL_868742, EPI_ISL_868743, EPI_ISL_868744, EPI_ISL_868745, EPI_ISL_868746, EPI_ISL_868747, EPI_ISL_868748, EPI_ISL_868749, EPI_ISL_868750, EPI_ISL_868751, EPI_ISL_868752, EPI_ISL_868753, EPI_ISL_868754, EPI_ISL_868755, EPI_ISL_868756, EPI_ISL_868757, EPI_ISL_868758, EPI_ISL_868759, EPI_ISL_868760, EPI_ISL_868761, EPI_ISL_868762, EPI_ISL_868763, EPI_ISL_868764, EPI_ISL_868765, EPI_ISL_868766, EPI_ISL_868767, EPI_ISL_868768, EPI_ISL_868769, EPI_ISL_868770, EPI_ISL_868771, EPI_ISL_868772, EPI_ISL_868773, EPI_ISL_868774, EPI_ISL_868775, EPI_ISL_868776, EPI_ISL_868777, EPI_ISL_868778, EPI_ISL_868779, EPI_ISL_868780, EPI_ISL_868781, EPI_ISL_868782, EPI_ISL_868783, EPI_ISL_868784, EPI_ISL_868785, EPI_ISL_868786, EPI_ISL_868787, EPI_ISL_868788, EPI_ISL_868789, EPI_ISL_868790, EPI_ISL_868791, EPI_ISL_868792, EPI_ISL_868793, EPI_ISL_868794, EPI_ISL_868795, EPI_ISL_868796, EPI_ISL_868797, EPI_ISL_868798, EPI_ISL_868799, EPI_ISL_868800, EPI_ISL_868801, EPI_ISL_868802, EPI_ISL_868803, EPI_ISL_868804, EPI_ISL_868805, EPI_ISL_868806, EPI_ISL_868807, EPI_ISL_868808, EPI_ISL_868809, EPI_ISL_868810, EPI_ISL_868811, EPI_ISL_868812, EPI_ISL_868813, EPI_ISL_868814, EPI_ISL_868815, EPI_ISL_868816, EPI_ISL_868817, EPI_ISL_868818, EPI_ISL_868819, EPI_ISL_868820, EPI_ISL_868821, EPI_ISL_868822, EPI_ISL_868823, EPI_ISL_868824, EPI_ISL_868825, EPI_ISL_868826, EPI_ISL_868827, EPI_ISL_868828, EPI_ISL_868829, EPI_ISL_868830, EPI_ISL_868831, EPI_ISL_868832, EPI_ISL_868833, EPI_ISL_868834, EPI_ISL_868835, EPI_ISL_868836, EPI_ISL_868837, EPI_ISL_868838, EPI_ISL_868839, EPI_ISL_868840, EPI_ISL_868841, EPI_ISL_868842, EPI_ISL_868843, EPI_ISL_868844, EPI_ISL_868845, EPI_ISL_868846, EPI_ISL_868847, EPI_ISL_868848, EPI_ISL_868849, EPI_ISL_868850, EPI_ISL_868851, EPI_ISL_868852, EPI_ISL_868853, EPI_ISL_868854, EPI_ISL_868855, EPI_ISL_868856, EPI_ISL_868857, EPI_ISL_868858, EPI_ISL_868859, EPI_ISL_868860, EPI_ISL_868861, EPI_ISL_868862, EPI_ISL_868863, EPI_ISL_868864, EPI_ISL_868865, EPI_ISL_868866, EPI_ISL_868867, EPI_ISL_868868, EPI_ISL_868869, EPI_ISL_868870, EPI_ISL_868871, EPI_ISL_868872, EPI_ISL_868873, EPI_ISL_868874, EPI_ISL_868875, EPI_ISL_868876, EPI_ISL_868877, EPI_ISL_868878, EPI_ISL_868879, EPI_ISL_868880, EPI_ISL_868881, EPI_ISL_868882, EPI_ISL_868883, EPI_ISL_868884, EPI_ISL_868885, EPI_ISL_868886, EPI_ISL_868887, EPI_ISL_868888, EPI_ISL_868889, EPI_ISL_868890, EPI_ISL_868891, EPI_ISL_868892, EPI_ISL_868893, EPI_ISL_868894, EPI_ISL_868895, EPI_ISL_868896, EPI_ISL_868897, EPI_ISL_868898, EPI_ISL_868899, EPI_ISL_868900, EPI_ISL_868901, EPI_ISL_868902, EPI_ISL_868903, EPI_ISL_868904, EPI_ISL_868905, EPI_ISL_868906, EPI_ISL_868907, EPI_ISL_868908, EPI_ISL_868909, EPI_ISL_868910, EPI_ISL_868911, EPI_ISL_868912, EPI_ISL_868913, EPI_ISL_868914, EPI_ISL_868915, EPI_ISL_868916, EPI_ISL_868917, EPI_ISL_868918, EPI_ISL_868919, EPI_ISL_868920, EPI_ISL_868921, EPI_ISL_868922, EPI_ISL_868923, EPI_ISL_868924, EPI_ISL_868925, EPI_ISL_868926, EPI_ISL_868927, EPI_ISL_868928, EPI_ISL_868929, EPI_ISL_868930, EPI_ISL_868931, EPI_ISL_868932, EPI_ISL_868933, EPI_ISL_868934, EPI_ISL_868935, EPI_ISL_868936, EPI_ISL_868937, EPI_ISL_868938, EPI_ISL_868939, EPI_ISL_868940, EPI_ISL_868941, EPI_ISL_868942, EPI_ISL_868943, EPI_ISL_868944, EPI_ISL_868945, EPI_ISL_868946, EPI_ISL_868947, EPI_ISL_868948, EPI_ISL_868949, EPI_ISL_868950, EPI_ISL_868951, EPI_ISL_868952, EPI_ISL_868953, EPI_ISL_868954, EPI_ISL_868955, EPI_ISL_868956, EPI_ISL_868957, EPI_ISL_868958, EPI_ISL_868959, EPI_ISL_868960, EPI_ISL_868961, EPI_ISL_868962, EPI_ISL_868963, EPI_ISL_868964, EPI_ISL_868965, EPI_ISL_868966, EPI_ISL_868967, EPI_ISL_868968, EPI_ISL_868969, EPI_ISL_868970, EPI_ISL_868971, EPI_ISL_868972, EPI_ISL_868973, EPI_ISL_868974, EPI_ISL_868975, EPI_ISL_868976, EPI_ISL_868977, EPI_ISL_868978 | see above                                                                                                                                                                                                           |                                                                           |                                                                                                                                                                                                                                                                                                                                                                                                                                                          |
|                                                                                                                                                                                                                                                                                                                                                                                                                                                                                                                                                                                                                                                                                                                                                                                                                                                                                                                                                                                                                                                                                                                                                                                                                                                                                                                                                                                                                                                                                                                                                                                                                                                                                                                                                                                                                                                                                                                                                                                                                                                                                                                                                                                                                                                                                                                                                                                                                                                                                                                                                                                                                                                                                                                                                                                                                                                                                                                                                                                                                                                                                                                                                                                                                                                                                                                                                                                                                                                                                                                                                                                                                                                                                                                                                                                                                                                                                                                                                                                                                                                                                                                                                                                                                                                                                                                                                                                | Bioinformatics and Biostatistics Lab, Advanced Sequencing                                                                                                                                                           | COVID-19 Genomics UK (COG-UK) Consortium                                  | Aengus Stewart, Jerome Nicod, Chelsea Sawyer, Laura Cubitt, Harshil Patel, Margaret Crawford                                                                                                                                                                                                                                                                                                                                                             |

| Facility                                                                                                                                                                                                                                                                                                                                                                                                                                                                                                                                                                                                                                                                                                                                                                                                                                                                                                                                                                                                                                                                                                                                                                                                                                                                                                                                                                                                                                                                                                                                                                                                                                                                                                                                                                                       |                                                                                                                                                                                                                     |                                                                            |                                                                                                                                                                                                                                                                                                                                                                                                                                                                                                                                                                                                                                                                                         |
|------------------------------------------------------------------------------------------------------------------------------------------------------------------------------------------------------------------------------------------------------------------------------------------------------------------------------------------------------------------------------------------------------------------------------------------------------------------------------------------------------------------------------------------------------------------------------------------------------------------------------------------------------------------------------------------------------------------------------------------------------------------------------------------------------------------------------------------------------------------------------------------------------------------------------------------------------------------------------------------------------------------------------------------------------------------------------------------------------------------------------------------------------------------------------------------------------------------------------------------------------------------------------------------------------------------------------------------------------------------------------------------------------------------------------------------------------------------------------------------------------------------------------------------------------------------------------------------------------------------------------------------------------------------------------------------------------------------------------------------------------------------------------------------------|---------------------------------------------------------------------------------------------------------------------------------------------------------------------------------------------------------------------|----------------------------------------------------------------------------|-----------------------------------------------------------------------------------------------------------------------------------------------------------------------------------------------------------------------------------------------------------------------------------------------------------------------------------------------------------------------------------------------------------------------------------------------------------------------------------------------------------------------------------------------------------------------------------------------------------------------------------------------------------------------------------------|
| EPI_ISL_882303, EPI_ISL_882305, EPI_ISL_882307, EPI_ISL_882308, EPI_ISL_882309, EPI_ISL_882314, EPI_ISL_882316, EPI_ISL_882319, EPI_ISL_882320, EPI_ISL_882321, EPI_ISL_882323, EPI_ISL_882327, EPI_ISL_882332, EPI_ISL_882339, EPI_ISL_882341, EPI_ISL_882343, EPI_ISL_882344, EPI_ISL_882352, EPI_ISL_882360, EPI_ISL_882361, EPI_ISL_882363, EPI_ISL_882364, EPI_ISL_882365, EPI_ISL_882371, EPI_ISL_882372, EPI_ISL_882375, EPI_ISL_882376, EPI_ISL_882377, EPI_ISL_882379, EPI_ISL_882382, EPI_ISL_882385, EPI_ISL_882388, EPI_ISL_882390, EPI_ISL_882393, EPI_ISL_882397, EPI_ISL_882398, EPI_ISL_882402, EPI_ISL_882404, EPI_ISL_882409, EPI_ISL_882413, EPI_ISL_882415, EPI_ISL_882418, EPI_ISL_882420, EPI_ISL_882421, EPI_ISL_882427, EPI_ISL_882428, EPI_ISL_882429, EPI_ISL_882434, EPI_ISL_882437, EPI_ISL_882438, EPI_ISL_882440, EPI_ISL_882441, EPI_ISL_882442, EPI_ISL_882445, EPI_ISL_882452, EPI_ISL_882471, EPI_ISL_882473, EPI_ISL_882475, EPI_ISL_882476, EPI_ISL_882480, EPI_ISL_882481, EPI_ISL_882482, EPI_ISL_882484, EPI_ISL_882491, EPI_ISL_882494, EPI_ISL_882506, EPI_ISL_882512, EPI_ISL_882518, EPI_ISL_882520, EPI_ISL_882524, EPI_ISL_882525, EPI_ISL_882534, EPI_ISL_882537, EPI_ISL_882538, EPI_ISL_882539, EPI_ISL_882542, EPI_ISL_882544, EPI_ISL_882548, EPI_ISL_882549, EPI_ISL_882550, EPI_ISL_882559, EPI_ISL_882562, EPI_ISL_882563, EPI_ISL_882564, EPI_ISL_882565, EPI_ISL_882566, EPI_ISL_882568, EPI_ISL_882571, EPI_ISL_882576, EPI_ISL_882579, EPI_ISL_882580, EPI_ISL_882585, EPI_ISL_882586, EPI_ISL_882589, EPI_ISL_882593, EPI_ISL_882595, EPI_ISL_882600, EPI_ISL_882601, EPI_ISL_882602, EPI_ISL_882612                                                                                                                                 |                                                                                                                                                                                                                     |                                                                            |                                                                                                                                                                                                                                                                                                                                                                                                                                                                                                                                                                                                                                                                                         |
| see above                                                                                                                                                                                                                                                                                                                                                                                                                                                                                                                                                                                                                                                                                                                                                                                                                                                                                                                                                                                                                                                                                                                                                                                                                                                                                                                                                                                                                                                                                                                                                                                                                                                                                                                                                                                      | Lighthouse Lab in Alderley Park                                                                                                                                                                                     | Wellcome Sanger Institute for the COVID-19 Genomics UK (COG-UK) Consortium | Jacquelyn Wynn, Mairead Hyland, The Lighthouse Lab in Alderley Park and Alex Alderton, Roberto Amato, Sonia Goncalves, Ewan Harrison, David K. Jackson, Ian Johnston, Dominic Kwiatkowski, Cordelia Langford, John Sillitoe on behalf of the Wellcome Sanger Institute COVID-19 Surveillance Team                                                                                                                                                                                                                                                                                                                                                                                       |
| EPI_ISL_918748, EPI_ISL_918749, EPI_ISL_918750, EPI_ISL_918751, EPI_ISL_918752, EPI_ISL_918753, EPI_ISL_918754, EPI_ISL_918755, EPI_ISL_918756, EPI_ISL_918757, EPI_ISL_918761, EPI_ISL_918762, EPI_ISL_918763, EPI_ISL_918940, EPI_ISL_918941, EPI_ISL_918942, EPI_ISL_918943, EPI_ISL_918944, EPI_ISL_918945, EPI_ISL_918946, EPI_ISL_918947, EPI_ISL_918948, EPI_ISL_918949, EPI_ISL_918950, EPI_ISL_918951, EPI_ISL_918952, EPI_ISL_918953, EPI_ISL_918954, EPI_ISL_918955, EPI_ISL_918958, EPI_ISL_918959, EPI_ISL_918960, EPI_ISL_918961, EPI_ISL_918962, EPI_ISL_918963, EPI_ISL_918964, EPI_ISL_918965, EPI_ISL_918966, EPI_ISL_918967, EPI_ISL_918968                                                                                                                                                                                                                                                                                                                                                                                                                                                                                                                                                                                                                                                                                                                                                                                                                                                                                                                                                                                                                                                                                                                                 |                                                                                                                                                                                                                     |                                                                            |                                                                                                                                                                                                                                                                                                                                                                                                                                                                                                                                                                                                                                                                                         |
| see above                                                                                                                                                                                                                                                                                                                                                                                                                                                                                                                                                                                                                                                                                                                                                                                                                                                                                                                                                                                                                                                                                                                                                                                                                                                                                                                                                                                                                                                                                                                                                                                                                                                                                                                                                                                      | University of Birmingham                                                                                                                                                                                            | COVID-19 Genomics UK (COG-UK) Consortium                                   | Institute of Microbiology, University of Birmingham: Claire McMurray, Joanne Stockton, Samuel Nicholls, Radoslaw Poplawski, Will Rowe, Josh Quick, Nicholas Loman. University of Birmingham Testing Laboratory: Celina M Whalley, Andrew Bosworth, Charlotte Poxon, Kasun Wanigasooriya, Oliver Pickles, Mike Kidd, Alex Richter, Andrew D Beggs PHE Heartlands Lab: Husam Osman, Andrew Bosworth. Queen Elizabeth Hospital: Anna Casey                                                                                                                                                                                                                                                 |
| EPI_ISL_918984, EPI_ISL_918997, EPI_ISL_919005, EPI_ISL_919018, EPI_ISL_919019, EPI_ISL_919020, EPI_ISL_919021, EPI_ISL_919022, EPI_ISL_919024, EPI_ISL_919025, EPI_ISL_919026, EPI_ISL_919027, EPI_ISL_919028, EPI_ISL_919030, EPI_ISL_919031, EPI_ISL_919032, EPI_ISL_919033, EPI_ISL_919034, EPI_ISL_919035, EPI_ISL_919036, EPI_ISL_919038, EPI_ISL_919038, EPI_ISL_919040, EPI_ISL_919042, EPI_ISL_919053, EPI_ISL_919054, EPI_ISL_919055, EPI_ISL_919058, EPI_ISL_919062, EPI_ISL_919063, EPI_ISL_919067, EPI_ISL_919070, EPI_ISL_919074, EPI_ISL_919075, EPI_ISL_919079, EPI_ISL_919080, EPI_ISL_919082, EPI_ISL_919084, EPI_ISL_919087, EPI_ISL_919091, EPI_ISL_919092, EPI_ISL_919093, EPI_ISL_919095, EPI_ISL_919097, EPI_ISL_919099, EPI_ISL_919101, EPI_ISL_919102, EPI_ISL_919103, EPI_ISL_919106, EPI_ISL_919107, EPI_ISL_919114, EPI_ISL_919119, EPI_ISL_919134, EPI_ISL_919136, EPI_ISL_919139, EPI_ISL_919143                                                                                                                                                                                                                                                                                                                                                                                                                                                                                                                                                                                                                                                                                                                                                                                                                                                                 |                                                                                                                                                                                                                     |                                                                            |                                                                                                                                                                                                                                                                                                                                                                                                                                                                                                                                                                                                                                                                                         |
| see above                                                                                                                                                                                                                                                                                                                                                                                                                                                                                                                                                                                                                                                                                                                                                                                                                                                                                                                                                                                                                                                                                                                                                                                                                                                                                                                                                                                                                                                                                                                                                                                                                                                                                                                                                                                      | Department of Pathology, University of Cambridge                                                                                                                                                                    | COVID-19 Genomics UK (COG-UK) Consortium                                   | Aminu S. Jahun, Yasmin Chaudhry, Iliana Georgana, Myra Hosmillo, Rhys Izu, Martin D. Curran, Surendra Parmar, Ian Goodfellow                                                                                                                                                                                                                                                                                                                                                                                                                                                                                                                                                            |
| EPI_ISL_919257                                                                                                                                                                                                                                                                                                                                                                                                                                                                                                                                                                                                                                                                                                                                                                                                                                                                                                                                                                                                                                                                                                                                                                                                                                                                                                                                                                                                                                                                                                                                                                                                                                                                                                                                                                                 | West of Scotland Specialist Virology Centre, NHSGGC / MRC-University of Glasgow Centre for Virus Research                                                                                                           | COVID-19 Genomics UK (COG-UK) Consortium                                   | Ana da Silva Filipe, Natasha Johnson, Kathy Smollett, Daniel Mair, Stephen Carmichael, Alice Broos, Lily Tong, Jenna Nichols, Kyriaki Nomikou; Sarah McDonald; Richard Orton, Joseph Hughes, Sreenu Vattipally, David L Robertson; Alasdair MacLean, Rory Gunson; Sharif Shaaban, Matthew Holden; Rachel Blacow, Guy Mollett, Kathy Li, James Shepherd, Antonia Ho, Emma Thomson                                                                                                                                                                                                                                                                                                        |
| EPI_ISL_919321, EPI_ISL_919322, EPI_ISL_919323, EPI_ISL_919324, EPI_ISL_919325, EPI_ISL_919326, EPI_ISL_919327, EPI_ISL_919328, EPI_ISL_919329, EPI_ISL_919330, EPI_ISL_919331, EPI_ISL_919332, EPI_ISL_919333, EPI_ISL_919334, EPI_ISL_919335, EPI_ISL_919336                                                                                                                                                                                                                                                                                                                                                                                                                                                                                                                                                                                                                                                                                                                                                                                                                                                                                                                                                                                                                                                                                                                                                                                                                                                                                                                                                                                                                                                                                                                                 |                                                                                                                                                                                                                     |                                                                            |                                                                                                                                                                                                                                                                                                                                                                                                                                                                                                                                                                                                                                                                                         |
| see above                                                                                                                                                                                                                                                                                                                                                                                                                                                                                                                                                                                                                                                                                                                                                                                                                                                                                                                                                                                                                                                                                                                                                                                                                                                                                                                                                                                                                                                                                                                                                                                                                                                                                                                                                                                      | Virology Department, Royal Infirmary of Edinburgh, NHS Lothian / School of Biological Sciences, University of Edinburgh / Institute of Genetics and Molecular Medicine, University of Edinburgh                     | COVID-19 Genomics UK (COG-UK) Consortium                                   | McHugh M, Dewar R, Rooke S, Gallagher M, Balcaza C, O'Toole Á, Scher E, Hill V, McCrone JT, Colquhoun R, Yu X, Jackson B, Rambaut A, Williams TC, Templeton K                                                                                                                                                                                                                                                                                                                                                                                                                                                                                                                           |
| EPI_ISL_919407, EPI_ISL_919408, EPI_ISL_919409, EPI_ISL_919410, EPI_ISL_919411, EPI_ISL_919412, EPI_ISL_919413, EPI_ISL_919414, EPI_ISL_919415, EPI_ISL_919416, EPI_ISL_919417, EPI_ISL_919418, EPI_ISL_919419, EPI_ISL_919421, EPI_ISL_919422, EPI_ISL_919423, EPI_ISL_919424, EPI_ISL_919425, EPI_ISL_919426, EPI_ISL_919427, EPI_ISL_919428, EPI_ISL_919429, EPI_ISL_919430, EPI_ISL_919431, EPI_ISL_919432, EPI_ISL_919433, EPI_ISL_919434, EPI_ISL_919435, EPI_ISL_919436, EPI_ISL_919437, EPI_ISL_919438, EPI_ISL_919439, EPI_ISL_919440, EPI_ISL_919441, EPI_ISL_919442, EPI_ISL_919443, EPI_ISL_919444                                                                                                                                                                                                                                                                                                                                                                                                                                                                                                                                                                                                                                                                                                                                                                                                                                                                                                                                                                                                                                                                                                                                                                                 |                                                                                                                                                                                                                     |                                                                            |                                                                                                                                                                                                                                                                                                                                                                                                                                                                                                                                                                                                                                                                                         |
| see above                                                                                                                                                                                                                                                                                                                                                                                                                                                                                                                                                                                                                                                                                                                                                                                                                                                                                                                                                                                                                                                                                                                                                                                                                                                                                                                                                                                                                                                                                                                                                                                                                                                                                                                                                                                      | University of Exeter                                                                                                                                                                                                | COVID-19 Genomics UK (COG-UK) Consortium                                   | Ben Temperton, Aaron Jeffries, Michelle Michelsen, Joanna Warwick-Dugdale, Audrey Farbos, Robyn Manley, Stephen Michell, Jane Masoli                                                                                                                                                                                                                                                                                                                                                                                                                                                                                                                                                    |
| EPI_ISL_919452, EPI_ISL_919453, EPI_ISL_919476                                                                                                                                                                                                                                                                                                                                                                                                                                                                                                                                                                                                                                                                                                                                                                                                                                                                                                                                                                                                                                                                                                                                                                                                                                                                                                                                                                                                                                                                                                                                                                                                                                                                                                                                                 | Liverpool Clinical Laboratories                                                                                                                                                                                     | COVID-19 Genomics UK (COG-UK) Consortium                                   | Sam Haldenby, Anita Lucaci, Steve Paterson, Julian Hiscox, Alistair Darby, M Almsaud, A Alrezaihi, Muhannad Alruwaili, Stuart D Armstrong, Jones Benjamin, Eleanor G Bentley, Anu Chawla, Jordan J Clark, Angela Cowell, Richard Eccles, Isabel Garcia-Dorival, Matthew Gemmell, Alessandro Gerada, PKF Gilmore, Richard Gregory, Ximeng Han, Catherine Hartley, Margaret Hughes, Miren Iturriza-Gomara, James Johnson, L Luu, Jenifer Manson, Charlotte Nelson, Elaine O'Toole, Cassie Olateju, Rebekah Penrice-Randal, Lucille Rainbow, N.P Randle, Trevor Ian Robinson, Parul Sharma, Ghada T Shawli, James P Stewart, Neil Swainston, Ecatarina Vasos, Joanne Watts, Mark Whitehead |
| EPI_ISL_919781, EPI_ISL_919782, EPI_ISL_919783, EPI_ISL_919784, EPI_ISL_919785, EPI_ISL_919786, EPI_ISL_919787, EPI_ISL_919788, EPI_ISL_919789, EPI_ISL_919790, EPI_ISL_919791, EPI_ISL_919792, EPI_ISL_919793, EPI_ISL_919794, EPI_ISL_919795, EPI_ISL_919796                                                                                                                                                                                                                                                                                                                                                                                                                                                                                                                                                                                                                                                                                                                                                                                                                                                                                                                                                                                                                                                                                                                                                                                                                                                                                                                                                                                                                                                                                                                                 |                                                                                                                                                                                                                     |                                                                            |                                                                                                                                                                                                                                                                                                                                                                                                                                                                                                                                                                                                                                                                                         |
| see above                                                                                                                                                                                                                                                                                                                                                                                                                                                                                                                                                                                                                                                                                                                                                                                                                                                                                                                                                                                                                                                                                                                                                                                                                                                                                                                                                                                                                                                                                                                                                                                                                                                                                                                                                                                      | Barts Health NHS Trust                                                                                                                                                                                              | COVID-19 Genomics UK (COG-UK) Consortium                                   | CUTINO-MOGUEL, Maria-Teresa; HARRINGTON, David; OWOYEMI, Dola; KULASEGARAN-SHYLINI, Raghavendran; BROAD, Claire; KELE, Beatrix                                                                                                                                                                                                                                                                                                                                                                                                                                                                                                                                                          |
| EPI_ISL_919961, EPI_ISL_919964, EPI_ISL_919966                                                                                                                                                                                                                                                                                                                                                                                                                                                                                                                                                                                                                                                                                                                                                                                                                                                                                                                                                                                                                                                                                                                                                                                                                                                                                                                                                                                                                                                                                                                                                                                                                                                                                                                                                 | University College London, Great Ormond Street Hospital for Children NHS Foundation Trust, Imperial College Healthcare NHS Trust                                                                                    | COVID-19 Genomics UK (COG-UK) Consortium                                   | Sergi Castellano, Rachel Williams, Mark Kristiansen, Paola Resende Silva, Sunando Roy, Tony Brooks, Helena Tutili, Paola Niola, Patricia Dyal, Charlotte Williams, Leysa Forrest, Yasmin Panchbhaya, Jacqueline Findlay, Samuel Weeks, Julianne Brown, Kathryn Harris, Paul Randell, James Price, Alison Holmes, Judith Breuer                                                                                                                                                                                                                                                                                                                                                          |
| EPI_ISL_920319, EPI_ISL_920344, EPI_ISL_920354, EPI_ISL_920457, EPI_ISL_920499, EPI_ISL_920629, EPI_ISL_920653                                                                                                                                                                                                                                                                                                                                                                                                                                                                                                                                                                                                                                                                                                                                                                                                                                                                                                                                                                                                                                                                                                                                                                                                                                                                                                                                                                                                                                                                                                                                                                                                                                                                                 | University College London Hospital                                                                                                                                                                                  | COVID-19 Genomics UK (COG-UK) Consortium                                   | Judith Heaney, Matthew Byott, Catherine Houlihan, Dan Frampton, Stuart Kirk, Moira Spyer and Eleni Nastouli                                                                                                                                                                                                                                                                                                                                                                                                                                                                                                                                                                             |
| EPI_ISL_920841, EPI_ISL_920842, EPI_ISL_920843, EPI_ISL_920844, EPI_ISL_920845, EPI_ISL_920846, EPI_ISL_920847, EPI_ISL_920854, EPI_ISL_920855                                                                                                                                                                                                                                                                                                                                                                                                                                                                                                                                                                                                                                                                                                                                                                                                                                                                                                                                                                                                                                                                                                                                                                                                                                                                                                                                                                                                                                                                                                                                                                                                                                                 | University College London, Great Ormond Street Hospital for Children NHS Foundation Trust, Imperial College Healthcare NHS Trust                                                                                    | COVID-19 Genomics UK (COG-UK) Consortium                                   | Sergi Castellano, Rachel Williams, Mark Kristiansen, Paola Resende Silva, Sunando Roy, Tony Brooks, Helena Tutili, Paola Niola, Patricia Dyal, Charlotte Williams, Leysa Forrest, Yasmin Panchbhaya, Jacqueline Findlay, Samuel Weeks, Julianne Brown, Kathryn Harris, Paul Randell, James Price, Alison Holmes, Judith Breuer                                                                                                                                                                                                                                                                                                                                                          |
| EPI_ISL_921022, EPI_ISL_921027, EPI_ISL_921028, EPI_ISL_921029, EPI_ISL_921030, EPI_ISL_921031, EPI_ISL_921032, EPI_ISL_921033, EPI_ISL_921034, EPI_ISL_921035, EPI_ISL_921036, EPI_ISL_921038, EPI_ISL_921039, EPI_ISL_921041, EPI_ISL_921042, EPI_ISL_921043, EPI_ISL_921044, EPI_ISL_921045, EPI_ISL_921046, EPI_ISL_921072, EPI_ISL_921073, EPI_ISL_921074, EPI_ISL_921075, EPI_ISL_921076, EPI_ISL_921077, EPI_ISL_921085, EPI_ISL_921087, EPI_ISL_921088, EPI_ISL_921089, EPI_ISL_921090, EPI_ISL_921118, EPI_ISL_921119, EPI_ISL_921120, EPI_ISL_921133, EPI_ISL_921135, EPI_ISL_921136                                                                                                                                                                                                                                                                                                                                                                                                                                                                                                                                                                                                                                                                                                                                                                                                                                                                                                                                                                                                                                                                                                                                                                                                 |                                                                                                                                                                                                                     |                                                                            |                                                                                                                                                                                                                                                                                                                                                                                                                                                                                                                                                                                                                                                                                         |
| see above                                                                                                                                                                                                                                                                                                                                                                                                                                                                                                                                                                                                                                                                                                                                                                                                                                                                                                                                                                                                                                                                                                                                                                                                                                                                                                                                                                                                                                                                                                                                                                                                                                                                                                                                                                                      | Regional Virus Laboratory, Belfast Health and Social Care Trust                                                                                                                                                     | COVID-19 Genomics UK (COG-UK) Consortium                                   | Conall McCaughey, James McKenna, Tanya Curran, Susan Feeney, Alison Watt, Ciara Cox, Mairead Connor, Zoltan Molnar, David Simpson, Derek Fairley                                                                                                                                                                                                                                                                                                                                                                                                                                                                                                                                        |
| EPI_ISL_921231, EPI_ISL_921233, EPI_ISL_921234, EPI_ISL_921235, EPI_ISL_921236, EPI_ISL_921237, EPI_ISL_921242, EPI_ISL_921249, EPI_ISL_921253, EPI_ISL_921254, EPI_ISL_921255, EPI_ISL_921259, EPI_ISL_921260, EPI_ISL_921261, EPI_ISL_921262, EPI_ISL_921264, EPI_ISL_921265, EPI_ISL_921268, EPI_ISL_921271, EPI_ISL_921272, EPI_ISL_921273, EPI_ISL_921274, EPI_ISL_921276, EPI_ISL_921278, EPI_ISL_921280, EPI_ISL_921281, EPI_ISL_921282, EPI_ISL_921283, EPI_ISL_921284, EPI_ISL_921286, EPI_ISL_921288, EPI_ISL_921295, EPI_ISL_921297, EPI_ISL_921298, EPI_ISL_921301, EPI_ISL_921303, EPI_ISL_921305, EPI_ISL_921313, EPI_ISL_921314, EPI_ISL_921317, EPI_ISL_921318, EPI_ISL_921364, EPI_ISL_921365, EPI_ISL_921366, EPI_ISL_921367, EPI_ISL_921368, EPI_ISL_921369, EPI_ISL_921370, EPI_ISL_921371, EPI_ISL_921372, EPI_ISL_921373, EPI_ISL_921374, EPI_ISL_921375, EPI_ISL_921376, EPI_ISL_921377, EPI_ISL_921378, EPI_ISL_921379, EPI_ISL_921380, EPI_ISL_921381, EPI_ISL_921382, EPI_ISL_921383, EPI_ISL_921384, EPI_ISL_921385, EPI_ISL_921386, EPI_ISL_921387, EPI_ISL_921388, EPI_ISL_921389, EPI_ISL_921391, EPI_ISL_921392, EPI_ISL_921393, EPI_ISL_921394, EPI_ISL_921395, EPI_ISL_921396, EPI_ISL_921397, EPI_ISL_921398, EPI_ISL_921399, EPI_ISL_921400, EPI_ISL_921401, EPI_ISL_921402, EPI_ISL_921403, EPI_ISL_921404, EPI_ISL_921405, EPI_ISL_921406, EPI_ISL_921414, EPI_ISL_921415, EPI_ISL_921416, EPI_ISL_921417, EPI_ISL_921418, EPI_ISL_921420, EPI_ISL_921421, EPI_ISL_921422, EPI_ISL_921423, EPI_ISL_921424, EPI_ISL_921425, EPI_ISL_921426, EPI_ISL_921432, EPI_ISL_921433, EPI_ISL_921665, EPI_ISL_921666, EPI_ISL_921667, EPI_ISL_921668, EPI_ISL_921669, EPI_ISL_921670, EPI_ISL_921671, EPI_ISL_921672, EPI_ISL_921673, EPI_ISL_921674, EPI_ISL_921675 |                                                                                                                                                                                                                     |                                                                            |                                                                                                                                                                                                                                                                                                                                                                                                                                                                                                                                                                                                                                                                                         |
| see above                                                                                                                                                                                                                                                                                                                                                                                                                                                                                                                                                                                                                                                                                                                                                                                                                                                                                                                                                                                                                                                                                                                                                                                                                                                                                                                                                                                                                                                                                                                                                                                                                                                                                                                                                                                      | Northumbria University / South Tees Hospitals NHS Foundation Trust / North Cumbria Integrated Care NHS Foundation Trust / North Tees and Hartlepool NHS Foundation Trust / Newcastle Hospitals NHS Foundation Trust | COVID-19 Genomics UK (COG-UK) Consortium                                   | Darren L Smith, Andrew Nelson, Matthew Bashton, Greg R Young, Joshua Loh, John Allan, Mohammad A Tariq, Giles S Holt, Gary Black, Wen C Yew, Lynn Dover, Paul Baker, Steve Liggett, Sarah Essex, Jane Greenaway, Debra Padgett, Clive Padgett, Clive Garren, Garren Scott, Edward Barton, Emma Swindells, Brendan Payne, Jennifer Collins, Yusra Taha, Gary Eltringham                                                                                                                                                                                                                                                                                                                  |
| EPI_ISL_921786, EPI_ISL_921787, EPI_ISL_921788, EPI_ISL_921789, EPI_ISL_921790, EPI_ISL_921791, EPI_ISL_921792, EPI_ISL_921793, EPI_ISL_921796, EPI_ISL_921798, EPI_ISL_921799, EPI_ISL_921800, EPI_ISL_921801, EPI_ISL_921802, EPI_ISL_921805, EPI_ISL_921808, EPI_ISL_921809, EPI_ISL_921810, EPI_ISL_921811, EPI_ISL_921813, EPI_ISL_921815, EPI_ISL_921820, EPI_ISL_921821, EPI_ISL_921824, EPI_ISL_921825, EPI_ISL_921826, EPI_ISL_921828, EPI_ISL_921839, EPI_ISL_921841, EPI_ISL_921842, EPI_ISL_921846, EPI_ISL_921847, EPI_ISL_921848, EPI_ISL_921849                                                                                                                                                                                                                                                                                                                                                                                                                                                                                                                                                                                                                                                                                                                                                                                                                                                                                                                                                                                                                                                                                                                                                                                                                                 |                                                                                                                                                                                                                     |                                                                            |                                                                                                                                                                                                                                                                                                                                                                                                                                                                                                                                                                                                                                                                                         |
| see above                                                                                                                                                                                                                                                                                                                                                                                                                                                                                                                                                                                                                                                                                                                                                                                                                                                                                                                                                                                                                                                                                                                                                                                                                                                                                                                                                                                                                                                                                                                                                                                                                                                                                                                                                                                      | Quadram Institute Bioscience                                                                                                                                                                                        | COVID-19 Genomics UK (COG-UK) Consortium                                   | Dave J. Baker, Gemma L. Kay, Alp Aydin, Thanh Le-Viet, Steven Rudder, Ana P. Tedim, Anastasia Kolyva, Maria Diaz, Leonardo de Oliveira Martins, Nabil-Fareed Alikhan, Lizzie Meadows, Rachael Stanley, Ngozi Elumogo, Muhammed Yasir, Nicholas M. Thomson, Alexander J Trotter, Rachel Gilroy, Samuel Bloomfield, Claire Stuart, Andrew Bell, Reenesh Prakash, Samir Devisevic, Alison E. Mather, John Wain, Mark Webber, Andrew J. Page, Justin O'Grady                                                                                                                                                                                                                                |
| EPI_ISL_922241, EPI_ISL_922260, EPI_ISL_922261, EPI_ISL_922262, EPI_ISL_922263, EPI_ISL_922264, EPI_ISL_922267, EPI_ISL_922268, EPI_ISL_922270, EPI_ISL_922271, EPI_ISL_922272, EPI_ISL_922274, EPI_ISL_922275, EPI_ISL_922276, EPI_ISL_922277, EPI_ISL_922279, EPI_ISL_922281, EPI_ISL_922282, EPI_ISL_922287, EPI_ISL_922288, EPI_ISL_922289, EPI_ISL_922290, EPI_ISL_922291, EPI_ISL_922292, EPI_ISL_922293, EPI_ISL_922296, EPI_ISL_922297, EPI_ISL_922299, EPI_ISL_922300, EPI_ISL_922302, EPI_ISL_922305, EPI_ISL_922313, EPI_ISL_922314                                                                                                                                                                                                                                                                                                                                                                                                                                                                                                                                                                                                                                                                                                                                                                                                                                                                                                                                                                                                                                                                                                                                                                                                                                                 |                                                                                                                                                                                                                     |                                                                            |                                                                                                                                                                                                                                                                                                                                                                                                                                                                                                                                                                                                                                                                                         |
| see above                                                                                                                                                                                                                                                                                                                                                                                                                                                                                                                                                                                                                                                                                                                                                                                                                                                                                                                                                                                                                                                                                                                                                                                                                                                                                                                                                                                                                                                                                                                                                                                                                                                                                                                                                                                      | Oxford Viromics, NDM, University of Oxford; Oxford University                                                                                                                                                       | COVID-19 Genomics UK (COG-UK) Consortium                                   | Tanya Golubchik, David Bonsall, George Macintyre, Amy Trebes, Mariateresa de Cesare, Catrin Moore, Alex Mobbs, Anita Justice, Robert Shaw, Monique                                                                                                                                                                                                                                                                                                                                                                                                                                                                                                                                      |

|                                                                                                                                                                                                                                                                                                                                                                                                                                                                                                                                                                                                                                                                                                                                                                                                                                                                                                                                                                                                                                                                                                                                                                                                                                                                                                                                                                                                                                                                                                                                                                                                                                                                                                                                                                                                                                                                                                                                                                                                                                                                                                                                                                                                                                                                                                                                                                                                                                                                                                                                                                                                                                                                                                                                                                                                                                                                                                                                                                                                                                                                                                                                                                                                                                                                                                                                                                                                                                                                                                                                                                                                                                                                                                                                                                                                                                                                                                                                |           |                                                                                                                                                                                  |                                                                                                                                                    |                                                                                                                                                                                                                                                                              |  |
|--------------------------------------------------------------------------------------------------------------------------------------------------------------------------------------------------------------------------------------------------------------------------------------------------------------------------------------------------------------------------------------------------------------------------------------------------------------------------------------------------------------------------------------------------------------------------------------------------------------------------------------------------------------------------------------------------------------------------------------------------------------------------------------------------------------------------------------------------------------------------------------------------------------------------------------------------------------------------------------------------------------------------------------------------------------------------------------------------------------------------------------------------------------------------------------------------------------------------------------------------------------------------------------------------------------------------------------------------------------------------------------------------------------------------------------------------------------------------------------------------------------------------------------------------------------------------------------------------------------------------------------------------------------------------------------------------------------------------------------------------------------------------------------------------------------------------------------------------------------------------------------------------------------------------------------------------------------------------------------------------------------------------------------------------------------------------------------------------------------------------------------------------------------------------------------------------------------------------------------------------------------------------------------------------------------------------------------------------------------------------------------------------------------------------------------------------------------------------------------------------------------------------------------------------------------------------------------------------------------------------------------------------------------------------------------------------------------------------------------------------------------------------------------------------------------------------------------------------------------------------------------------------------------------------------------------------------------------------------------------------------------------------------------------------------------------------------------------------------------------------------------------------------------------------------------------------------------------------------------------------------------------------------------------------------------------------------------------------------------------------------------------------------------------------------------------------------------------------------------------------------------------------------------------------------------------------------------------------------------------------------------------------------------------------------------------------------------------------------------------------------------------------------------------------------------------------------------------------------------------------------------------------------------------------------|-----------|----------------------------------------------------------------------------------------------------------------------------------------------------------------------------------|----------------------------------------------------------------------------------------------------------------------------------------------------|------------------------------------------------------------------------------------------------------------------------------------------------------------------------------------------------------------------------------------------------------------------------------|--|
| Hospitals: Basingstoke and North Hampshire Hospital                                                                                                                                                                                                                                                                                                                                                                                                                                                                                                                                                                                                                                                                                                                                                                                                                                                                                                                                                                                                                                                                                                                                                                                                                                                                                                                                                                                                                                                                                                                                                                                                                                                                                                                                                                                                                                                                                                                                                                                                                                                                                                                                                                                                                                                                                                                                                                                                                                                                                                                                                                                                                                                                                                                                                                                                                                                                                                                                                                                                                                                                                                                                                                                                                                                                                                                                                                                                                                                                                                                                                                                                                                                                                                                                                                                                                                                                            |           |                                                                                                                                                                                  | Andersson, Timothy Peto, Emma Wise, Nathan Moore, Jessica Lynch, Nick Cortes, Matilde Mori, Stephen Kidd, David Buck, John Todd, Christophe Fraser |                                                                                                                                                                                                                                                                              |  |
| EPI_ISL_923242, EPI_ISL_923244, EPI_ISL_923258, EPI_ISL_923265, EPI_ISL_923267, EPI_ISL_923268, EPI_ISL_923295, EPI_ISL_923425, EPI_ISL_923426, EPI_ISL_923427, EPI_ISL_923429, EPI_ISL_923431, EPI_ISL_923432, EPI_ISL_923433, EPI_ISL_923434, EPI_ISL_923437, EPI_ISL_923439, EPI_ISL_923440, EPI_ISL_923441, EPI_ISL_923442, EPI_ISL_923444, EPI_ISL_923445, EPI_ISL_923446, EPI_ISL_923447, EPI_ISL_923448, EPI_ISL_923449, EPI_ISL_923451, EPI_ISL_923452, EPI_ISL_923453, EPI_ISL_923454, EPI_ISL_923455, EPI_ISL_923456, EPI_ISL_923457, EPI_ISL_923459, EPI_ISL_923460, EPI_ISL_923461, EPI_ISL_923462, EPI_ISL_923463, EPI_ISL_923464, EPI_ISL_923465, EPI_ISL_923466, EPI_ISL_923467, EPI_ISL_923468, EPI_ISL_923469, EPI_ISL_923470, EPI_ISL_923471, EPI_ISL_923472, EPI_ISL_923473, EPI_ISL_923475, EPI_ISL_923476, EPI_ISL_923477, EPI_ISL_923478, EPI_ISL_923479, EPI_ISL_923480, EPI_ISL_923481, EPI_ISL_923482, EPI_ISL_923483, EPI_ISL_923484, EPI_ISL_923485, EPI_ISL_923486, EPI_ISL_923487, EPI_ISL_923488, EPI_ISL_923489, EPI_ISL_923490, EPI_ISL_923491, EPI_ISL_923492, EPI_ISL_923493, EPI_ISL_923494, EPI_ISL_923495, EPI_ISL_923496, EPI_ISL_923497, EPI_ISL_923498, EPI_ISL_923499, EPI_ISL_923500, EPI_ISL_923501, EPI_ISL_923502, EPI_ISL_923503, EPI_ISL_923504, EPI_ISL_923505, EPI_ISL_923506, EPI_ISL_923507, EPI_ISL_923508, EPI_ISL_923509, EPI_ISL_923510, EPI_ISL_923511, EPI_ISL_923512, EPI_ISL_923513, EPI_ISL_923514, EPI_ISL_923515, EPI_ISL_923516, EPI_ISL_923517, EPI_ISL_923518, EPI_ISL_923519, EPI_ISL_923520, EPI_ISL_923521, EPI_ISL_923522, EPI_ISL_923523, EPI_ISL_923524, EPI_ISL_923525, EPI_ISL_923526, EPI_ISL_923527, EPI_ISL_923528, EPI_ISL_923529, EPI_ISL_923530, EPI_ISL_923531, EPI_ISL_923532, EPI_ISL_923533, EPI_ISL_923534, EPI_ISL_923535, EPI_ISL_923536, EPI_ISL_923537, EPI_ISL_923538, EPI_ISL_923539, EPI_ISL_923540, EPI_ISL_923541, EPI_ISL_923542, EPI_ISL_923543, EPI_ISL_923544, EPI_ISL_923545, EPI_ISL_923546, EPI_ISL_923547, EPI_ISL_923548, EPI_ISL_923549, EPI_ISL_923550, EPI_ISL_923551, EPI_ISL_923552, EPI_ISL_923553, EPI_ISL_923554, EPI_ISL_923555, EPI_ISL_923556, EPI_ISL_923557, EPI_ISL_923558, EPI_ISL_923559, EPI_ISL_923560, EPI_ISL_923561, EPI_ISL_923562, EPI_ISL_923563, EPI_ISL_923564, EPI_ISL_923565, EPI_ISL_923566, EPI_ISL_923567, EPI_ISL_923568, EPI_ISL_923569, EPI_ISL_923570, EPI_ISL_923571, EPI_ISL_923572, EPI_ISL_923573, EPI_ISL_923574, EPI_ISL_923575, EPI_ISL_923576, EPI_ISL_923577, EPI_ISL_923578, EPI_ISL_923579, EPI_ISL_923580, EPI_ISL_923581, EPI_ISL_923582, EPI_ISL_923583, EPI_ISL_923584, EPI_ISL_923585, EPI_ISL_923586, EPI_ISL_923587, EPI_ISL_923588, EPI_ISL_923589, EPI_ISL_923590, EPI_ISL_923591, EPI_ISL_923592, EPI_ISL_923593, EPI_ISL_923594, EPI_ISL_923595, EPI_ISL_923596, EPI_ISL_923597, EPI_ISL_923598, EPI_ISL_923599, EPI_ISL_923600, EPI_ISL_923601, EPI_ISL_923602, EPI_ISL_923603, EPI_ISL_923604, EPI_ISL_923605, EPI_ISL_923606, EPI_ISL_923607, EPI_ISL_923608, EPI_ISL_923609, EPI_ISL_923610, EPI_ISL_923611, EPI_ISL_923612, EPI_ISL_923613, EPI_ISL_923614, EPI_ISL_923615, EPI_ISL_923616, EPI_ISL_923617, EPI_ISL_923618, EPI_ISL_923619, EPI_ISL_923620, EPI_ISL_923621, EPI_ISL_923622, EPI_ISL_923623, EPI_ISL_923624, EPI_ISL_923625, EPI_ISL_923626, EPI_ISL_923627, EPI_ISL_923628, EPI_ISL_923629, EPI_ISL_923630, EPI_ISL_923631, EPI_ISL_923632, EPI_ISL_923633, EPI_ISL_923634, EPI_ISL_923635, EPI_ISL_923636, EPI_ISL_923637, EPI_ISL_923638, EPI_ISL_923639, EPI_ISL_923640, EPI_ISL_923641, EPI_ISL_923642, EPI_ISL_923643, EPI_ISL_923644, EPI_ISL_923645, EPI_ISL_923646, EPI_ISL_923647, EPI_ISL_923648, EPI_ISL_923649, EPI_ISL_923650, EPI_ISL_923651, EPI_ISL_923652, EPI_ISL_923653, EPI_ISL_923654, EPI_ISL_923655, EPI_ISL_923656, EPI_ISL_923657, EPI_ISL_923658, EPI_ISL_923659, EPI_ISL_923660, EPI_ISL_923661, EPI_ISL_923662 | see above | Centre for Enzyme Innovation, University of Portsmouth / Translational Research Laboratory, Portsmouth Hospitals NHS Trust                                                       | COVID-19 Genomics UK (COG-UK) Consortium                                                                                                           | Angela Beckett,Salman Goudarzi,Christopher Fearn,Kate Cook,Katie Loveson,Sharon Glaysher,Scott Elliott,Samuel Robson                                                                                                                                                         |  |
| EPI_ISL_924094, EPI_ISL_924168, EPI_ISL_924213, EPI_ISL_924237, EPI_ISL_924250, EPI_ISL_924280, EPI_ISL_924283, EPI_ISL_924402                                                                                                                                                                                                                                                                                                                                                                                                                                                                                                                                                                                                                                                                                                                                                                                                                                                                                                                                                                                                                                                                                                                                                                                                                                                                                                                                                                                                                                                                                                                                                                                                                                                                                                                                                                                                                                                                                                                                                                                                                                                                                                                                                                                                                                                                                                                                                                                                                                                                                                                                                                                                                                                                                                                                                                                                                                                                                                                                                                                                                                                                                                                                                                                                                                                                                                                                                                                                                                                                                                                                                                                                                                                                                                                                                                                                 |           | Virology Department, Sheffield Teaching Hospitals NHS Foundation Trust/Department of Infection, Immunity and Cardiovascular Disease, The Medical School, University of Sheffield | COVID-19 Genomics UK (COG-UK) Consortium                                                                                                           | Thushan de Silva, Matthew Parker, Nikki Smith, Adri Anygal, Rebecca Brown, Luke Green, Rachel Tucker, Paul Parsons, Danielle Groves, Katie Johnson, Laura Carrilero, Alex Keeley, Dave Partridge, Matthew Wyles, Benjamin Lindsey, Mehmet Yavuz, Mohammad Raza, Cariad Evans |  |
| EPI_ISL_924430, EPI_ISL_924431, EPI_ISL_924432, EPI_ISL_924433, EPI_ISL_924434, EPI_ISL_924435, EPI_ISL_924436, EPI_ISL_924437, EPI_ISL_924438, EPI_ISL_924439, EPI_ISL_924440, EPI_ISL_924441, EPI_ISL_924443, EPI_ISL_924444, EPI_ISL_924445, EPI_ISL_924446, EPI_ISL_924447, EPI_ISL_924448, EPI_ISL_924449, EPI_ISL_924450, EPI_ISL_924451, EPI_ISL_924452, EPI_ISL_924453, EPI_ISL_924454, EPI_ISL_924455, EPI_ISL_924456, EPI_ISL_924457, EPI_ISL_924458, EPI_ISL_924459, EPI_ISL_924460, EPI_ISL_924461, EPI_ISL_924462, EPI_ISL_924463, EPI_ISL_924464, EPI_ISL_924465, EPI_ISL_924466, EPI_ISL_924467, EPI_ISL_924468, EPI_ISL_924469, EPI_ISL_924470, EPI_ISL_924471, EPI_ISL_924472, EPI_ISL_924473, EPI_ISL_924474, EPI_ISL_924475, EPI_ISL_924476, EPI_ISL_924477, EPI_ISL_924478, EPI_ISL_924479, EPI_ISL_924480, EPI_ISL_924481, EPI_ISL_924482, EPI_ISL_924483, EPI_ISL_924484, EPI_ISL_924485, EPI_ISL_924486, EPI_ISL_924487, EPI_ISL_924488, EPI_ISL_924489, EPI_ISL_924490, EPI_ISL_924491, EPI_ISL_924492, EPI_ISL_924493, EPI_ISL_924494, EPI_ISL_924495, EPI_ISL_924497, EPI_ISL_924498, EPI_ISL_924500, EPI_ISL_924501, EPI_ISL_924502, EPI_ISL_924503, EPI_ISL_92                                                                                                                                                                                                                                                                                                                                                                                                                                                                                                                                                                                                                                                                                                                                                                                                                                                                                                                                                                                                                                                                                                                                                                                                                                                                                                                                                                                                                                                                                                                                                                                                                                                                                                                                                                                                                                                                                                                                                                                                                                                                                                                                                                                                                                                                                                                                                                                                                                                                                                                                                                                                                                                                                                                                     |           |                                                                                                                                                                                  |                                                                                                                                                    |                                                                                                                                                                                                                                                                              |  |

|                                                                                                                                                                                                                                                                                                                                                                                                                                                                                                                                                                                                                                                                                                                                                                                                                                                                                                                                                                                                                                                                                                                                                                                                                                                                                                                                                                                                                                                                                                                                                                                                                                                                                                                                                                                                                                                                                                                                                                                                                                                                                                                                                                                                                                                                                                                                                                                                                                                                                                                                                                                                                                                                                                                                                                                                                                                                                                                                                                                                                                                                                                                                                                                                                                                                                                                                                                                                                                                                                                                                                                                                                                                                                                                                                                                                                                                                                                                                                                                                                                                                                                                                                                                                                                                                                                                                                                                                                                                                                                                                                                                                                                                                                                |           |                                                                                                                                                                                                                     |                                          |                                                                                                                                                                                                                                                                                                                                                                                                                                                        |
|------------------------------------------------------------------------------------------------------------------------------------------------------------------------------------------------------------------------------------------------------------------------------------------------------------------------------------------------------------------------------------------------------------------------------------------------------------------------------------------------------------------------------------------------------------------------------------------------------------------------------------------------------------------------------------------------------------------------------------------------------------------------------------------------------------------------------------------------------------------------------------------------------------------------------------------------------------------------------------------------------------------------------------------------------------------------------------------------------------------------------------------------------------------------------------------------------------------------------------------------------------------------------------------------------------------------------------------------------------------------------------------------------------------------------------------------------------------------------------------------------------------------------------------------------------------------------------------------------------------------------------------------------------------------------------------------------------------------------------------------------------------------------------------------------------------------------------------------------------------------------------------------------------------------------------------------------------------------------------------------------------------------------------------------------------------------------------------------------------------------------------------------------------------------------------------------------------------------------------------------------------------------------------------------------------------------------------------------------------------------------------------------------------------------------------------------------------------------------------------------------------------------------------------------------------------------------------------------------------------------------------------------------------------------------------------------------------------------------------------------------------------------------------------------------------------------------------------------------------------------------------------------------------------------------------------------------------------------------------------------------------------------------------------------------------------------------------------------------------------------------------------------------------------------------------------------------------------------------------------------------------------------------------------------------------------------------------------------------------------------------------------------------------------------------------------------------------------------------------------------------------------------------------------------------------------------------------------------------------------------------------------------------------------------------------------------------------------------------------------------------------------------------------------------------------------------------------------------------------------------------------------------------------------------------------------------------------------------------------------------------------------------------------------------------------------------------------------------------------------------------------------------------------------------------------------------------------------------------------------------------------------------------------------------------------------------------------------------------------------------------------------------------------------------------------------------------------------------------------------------------------------------------------------------------------------------------------------------------------------------------------------------------------------------------------------------|-----------|---------------------------------------------------------------------------------------------------------------------------------------------------------------------------------------------------------------------|------------------------------------------|--------------------------------------------------------------------------------------------------------------------------------------------------------------------------------------------------------------------------------------------------------------------------------------------------------------------------------------------------------------------------------------------------------------------------------------------------------|
| EPI_ISL_950965, EPI_ISL_950966, EPI_ISL_950968, EPI_ISL_950970, EPI_ISL_950971, EPI_ISL_950972, EPI_ISL_950973, EPI_ISL_950974, EPI_ISL_950976, EPI_ISL_950979, EPI_ISL_950980, EPI_ISL_950981, EPI_ISL_950982, EPI_ISL_950983, EPI_ISL_950984, EPI_ISL_950985, EPI_ISL_950987, EPI_ISL_950988, EPI_ISL_950989, EPI_ISL_950990, EPI_ISL_950991, EPI_ISL_950992, EPI_ISL_950993, EPI_ISL_950994, EPI_ISL_950995, EPI_ISL_950996, EPI_ISL_950997, EPI_ISL_950999, EPI_ISL_951000, EPI_ISL_951002, EPI_ISL_951003, EPI_ISL_951004, EPI_ISL_951005, EPI_ISL_951006, EPI_ISL_951007, EPI_ISL_951008, EPI_ISL_951009, EPI_ISL_951010, EPI_ISL_951011, EPI_ISL_951012, EPI_ISL_951013, EPI_ISL_951014, EPI_ISL_951016, EPI_ISL_951018, EPI_ISL_951020, EPI_ISL_951021, EPI_ISL_951023, EPI_ISL_951024, EPI_ISL_951025, EPI_ISL_951026, EPI_ISL_951027, EPI_ISL_951028, EPI_ISL_951029, EPI_ISL_951030, EPI_ISL_951031, EPI_ISL_951032, EPI_ISL_951033, EPI_ISL_951034, EPI_ISL_951036, EPI_ISL_951037, EPI_ISL_951038, EPI_ISL_951042, EPI_ISL_951043, EPI_ISL_951044, EPI_ISL_951045, EPI_ISL_951046, EPI_ISL_951048, EPI_ISL_951049, EPI_ISL_951050, EPI_ISL_951052, EPI_ISL_951053, EPI_ISL_951054, EPI_ISL_951055, EPI_ISL_951056, EPI_ISL_951057, EPI_ISL_951058, EPI_ISL_951059, EPI_ISL_951061, EPI_ISL_951062, EPI_ISL_951064, EPI_ISL_951066, EPI_ISL_951079, EPI_ISL_951080, EPI_ISL_951081, EPI_ISL_951083, EPI_ISL_951094, EPI_ISL_951097, EPI_ISL_951098, EPI_ISL_951163, EPI_ISL_951164, EPI_ISL_951165, EPI_ISL_951166, EPI_ISL_951169, EPI_ISL_951170, EPI_ISL_951171, EPI_ISL_951249                                                                                                                                                                                                                                                                                                                                                                                                                                                                                                                                                                                                                                                                                                                                                                                                                                                                                                                                                                                                                                                                                                                                                                                                                                                                                                                                                                                                                                                                                                                                                                                                                                                                                                                                                                                                                                                                                                                                                                                                                                                                                                                                                                                                                                                                                                                                                                                                                                                                                                                                                                                                                                                                                                                                                                                                                                                                                                                                                                                                                                                                                                 | see above | Oxford Viroemics, NDM, University of Oxford; Oxford University Hospitals; Basingstoke and North Hampshire Hospital                                                                                                  | COVID-19 Genomics UK (COG-UK) Consortium | Tanya Golubchik, David Bonsall, George Macintyre, Amy Trebes, Mariateresa de Cesare, Catrin Moore, Alex Mobbs, Anita Justice, Robert Shaw, Monique Andersson, Timothy Peto, Emma Wise, Nathan Moore, Jessica Lynch, Nick Cortes, Matilde Mori, Stephen Kidd, David Buck, John Todd, Christophe Fraser                                                                                                                                                  |
| EPI_ISL_952430, EPI_ISL_952435, EPI_ISL_952500, EPI_ISL_952501, EPI_ISL_952502, EPI_ISL_952503, EPI_ISL_952504, EPI_ISL_952505, EPI_ISL_952506, EPI_ISL_952508, EPI_ISL_952509, EPI_ISL_952510, EPI_ISL_952511, EPI_ISL_952512, EPI_ISL_952513, EPI_ISL_952514, EPI_ISL_952515, EPI_ISL_952516, EPI_ISL_952517, EPI_ISL_952518, EPI_ISL_952519, EPI_ISL_952520, EPI_ISL_952603, EPI_ISL_952604, EPI_ISL_952605, EPI_ISL_952606, EPI_ISL_952607, EPI_ISL_952608, EPI_ISL_952609, EPI_ISL_952610, EPI_ISL_952611, EPI_ISL_952612, EPI_ISL_952613, EPI_ISL_952614, EPI_ISL_952615, EPI_ISL_952616, EPI_ISL_952617, EPI_ISL_952618, EPI_ISL_952619, EPI_ISL_952620, EPI_ISL_952621, EPI_ISL_952622, EPI_ISL_952623, EPI_ISL_952625, EPI_ISL_952626, EPI_ISL_952627, EPI_ISL_952628, EPI_ISL_952629, EPI_ISL_952630, EPI_ISL_952631, EPI_ISL_952632, EPI_ISL_952633, EPI_ISL_952634, EPI_ISL_952635, EPI_ISL_952637, EPI_ISL_952638, EPI_ISL_952639, EPI_ISL_952640, EPI_ISL_952641, EPI_ISL_952642, EPI_ISL_952643, EPI_ISL_952644, EPI_ISL_952645, EPI_ISL_952646, EPI_ISL_952647, EPI_ISL_952648, EPI_ISL_952649, EPI_ISL_952650, EPI_ISL_952651, EPI_ISL_952652, EPI_ISL_952653, EPI_ISL_952654, EPI_ISL_952655, EPI_ISL_952656, EPI_ISL_952657, EPI_ISL_952658, EPI_ISL_952659, EPI_ISL_952660, EPI_ISL_952661, EPI_ISL_952662, EPI_ISL_952663, EPI_ISL_952664, EPI_ISL_952665, EPI_ISL_952666, EPI_ISL_952667, EPI_ISL_952668, EPI_ISL_952669, EPI_ISL_952670, EPI_ISL_952671, EPI_ISL_952672, EPI_ISL_952674, EPI_ISL_952676, EPI_ISL_952678, EPI_ISL_952681, EPI_ISL_952681, EPI_ISL_952682, EPI_ISL_952683, EPI_ISL_952684, EPI_ISL_952685, EPI_ISL_952686, EPI_ISL_952687, EPI_ISL_952688, EPI_ISL_952689, EPI_ISL_952690, EPI_ISL_952691, EPI_ISL_952692, EPI_ISL_952693, EPI_ISL_952694, EPI_ISL_952695, EPI_ISL_952696, EPI_ISL_952697, EPI_ISL_952698, EPI_ISL_952699, EPI_ISL_952700, EPI_ISL_952701, EPI_ISL_952702, EPI_ISL_952703, EPI_ISL_952704, EPI_ISL_952705, EPI_ISL_952706, EPI_ISL_952707, EPI_ISL_952708, EPI_ISL_952709, EPI_ISL_952710, EPI_ISL_952711, EPI_ISL_952712, EPI_ISL_952713, EPI_ISL_952714, EPI_ISL_952715, EPI_ISL_952716, EPI_ISL_952717, EPI_ISL_952718, EPI_ISL_952719, EPI_ISL_952720, EPI_ISL_952721, EPI_ISL_952722, EPI_ISL_952723, EPI_ISL_952724, EPI_ISL_952725, EPI_ISL_952726, EPI_ISL_952727, EPI_ISL_952728, EPI_ISL_952729, EPI_ISL_952730, EPI_ISL_952731, EPI_ISL_952732, EPI_ISL_952733, EPI_ISL_952734, EPI_ISL_952735, EPI_ISL_952736, EPI_ISL_952737, EPI_ISL_952738, EPI_ISL_952739, EPI_ISL_952740, EPI_ISL_952741, EPI_ISL_952742, EPI_ISL_952743, EPI_ISL_952744, EPI_ISL_952745, EPI_ISL_952746, EPI_ISL_952747, EPI_ISL_952748, EPI_ISL_952749, EPI_ISL_952750, EPI_ISL_952751, EPI_ISL_952752, EPI_ISL_952753, EPI_ISL_952754, EPI_ISL_952755, EPI_ISL_952756, EPI_ISL_952757, EPI_ISL_952758, EPI_ISL_952759, EPI_ISL_952760, EPI_ISL_952761, EPI_ISL_952762, EPI_ISL_952763, EPI_ISL_952764, EPI_ISL_952765, EPI_ISL_952766, EPI_ISL_952767, EPI_ISL_952768, EPI_ISL_952769, EPI_ISL_952770, EPI_ISL_952771, EPI_ISL_952772, EPI_ISL_952773, EPI_ISL_952774, EPI_ISL_952775, EPI_ISL_952776                                                                                                                                                                                                                                                                                                                                                                                                                                                                                                                                                                                                                                                                                                                                                                                                                                                                                                                                                                                                                                                                                                                                                                                                                                                                                                                                                                                                                                                                                                                                 | see above | Centre for Enzyme Innovation, University of Portsmouth / Translational Research Laboratory, Portsmouth Hospitals NHS Trust                                                                                          | COVID-19 Genomics UK (COG-UK) Consortium | Angela Beckett, Salman Goudarzi, Christopher Fearn, Kate Cook, Katie Loveson, Sharon Glaysheer, Scott Elliott, Samuel Robson                                                                                                                                                                                                                                                                                                                           |
| EPI_ISL_996083, EPI_ISL_996084, EPI_ISL_996085, EPI_ISL_996086, EPI_ISL_996087, EPI_ISL_996089, EPI_ISL_996090, EPI_ISL_996091, EPI_ISL_996092, EPI_ISL_996093, EPI_ISL_996094, EPI_ISL_996095, EPI_ISL_996096, EPI_ISL_996097, EPI_ISL_996098, EPI_ISL_996099, EPI_ISL_996100, EPI_ISL_996101, EPI_ISL_996102, EPI_ISL_996103, EPI_ISL_996104, EPI_ISL_996105, EPI_ISL_996106, EPI_ISL_996107, EPI_ISL_996108, EPI_ISL_996109, EPI_ISL_996110, EPI_ISL_996111, EPI_ISL_996112, EPI_ISL_996113, EPI_ISL_996114, EPI_ISL_996115, EPI_ISL_996116, EPI_ISL_996118, EPI_ISL_996119, EPI_ISL_996120, EPI_ISL_996121, EPI_ISL_996122, EPI_ISL_996123, EPI_ISL_996124, EPI_ISL_996125, EPI_ISL_996126, EPI_ISL_996127, EPI_ISL_996128, EPI_ISL_996129, EPI_ISL_996130, EPI_ISL_996131, EPI_ISL_996132, EPI_ISL_996133, EPI_ISL_996134, EPI_ISL_996135, EPI_ISL_996136, EPI_ISL_996137, EPI_ISL_996138, EPI_ISL_996139, EPI_ISL_996140, EPI_ISL_996141, EPI_ISL_996142, EPI_ISL_996143, EPI_ISL_996145, EPI_ISL_996146, EPI_ISL_996147, EPI_ISL_996148, EPI_ISL_996149, EPI_ISL_996150, EPI_ISL_996151, EPI_ISL_996152, EPI_ISL_996153, EPI_ISL_996154, EPI_ISL_996155, EPI_ISL_996156, EPI_ISL_996157, EPI_ISL_996158, EPI_ISL_996159, EPI_ISL_996160, EPI_ISL_996161, EPI_ISL_996162, EPI_ISL_996163, EPI_ISL_996164, EPI_ISL_996166, EPI_ISL_996177, EPI_ISL_996178, EPI_ISL_996179, EPI_ISL_996180, EPI_ISL_996181, EPI_ISL_996183, EPI_ISL_996185, EPI_ISL_996186, EPI_ISL_996187, EPI_ISL_996188, EPI_ISL_996189, EPI_ISL_996190, EPI_ISL_996191, EPI_ISL_996192, EPI_ISL_996195, EPI_ISL_996196, EPI_ISL_996197, EPI_ISL_996198, EPI_ISL_996199, EPI_ISL_996200, EPI_ISL_996201, EPI_ISL_996202, EPI_ISL_996203, EPI_ISL_996204, EPI_ISL_996205, EPI_ISL_996206, EPI_ISL_996207, EPI_ISL_996208, EPI_ISL_996209, EPI_ISL_996210, EPI_ISL_996211, EPI_ISL_996212, EPI_ISL_996213, EPI_ISL_996214, EPI_ISL_996215, EPI_ISL_996216, EPI_ISL_996217, EPI_ISL_996218, EPI_ISL_996219, EPI_ISL_996220, EPI_ISL_996221, EPI_ISL_996223, EPI_ISL_996224, EPI_ISL_996225, EPI_ISL_996226, EPI_ISL_996227, EPI_ISL_996228, EPI_ISL_996229, EPI_ISL_996230, EPI_ISL_996231, EPI_ISL_996232, EPI_ISL_996233, EPI_ISL_996234, EPI_ISL_996235, EPI_ISL_996236, EPI_ISL_996237, EPI_ISL_996238, EPI_ISL_996239, EPI_ISL_996240, EPI_ISL_996241, EPI_ISL_996242, EPI_ISL_996243, EPI_ISL_996244, EPI_ISL_996246, EPI_ISL_996247, EPI_ISL_996248, EPI_ISL_996249, EPI_ISL_996250, EPI_ISL_996251, EPI_ISL_996252, EPI_ISL_996253, EPI_ISL_996254, EPI_ISL_996255, EPI_ISL_996256, EPI_ISL_996257, EPI_ISL_996258, EPI_ISL_996259, EPI_ISL_996260, EPI_ISL_996261, EPI_ISL_996262, EPI_ISL_996263, EPI_ISL_996264, EPI_ISL_996265, EPI_ISL_996266, EPI_ISL_996267, EPI_ISL_996268, EPI_ISL_996269, EPI_ISL_996270, EPI_ISL_996271, EPI_ISL_996272, EPI_ISL_996273, EPI_ISL_996274, EPI_ISL_996275, EPI_ISL_996276, EPI_ISL_996277, EPI_ISL_996278, EPI_ISL_996279, EPI_ISL_996280, EPI_ISL_996281, EPI_ISL_996283, EPI_ISL_996284, EPI_ISL_996285, EPI_ISL_996286, EPI_ISL_996287, EPI_ISL_996288, EPI_ISL_996289, EPI_ISL_996290, EPI_ISL_996291, EPI_ISL_996292, EPI_ISL_996293, EPI_ISL_996294, EPI_ISL_996295, EPI_ISL_996296, EPI_ISL_996298, EPI_ISL_996299, EPI_ISL_996300, EPI_ISL_996301, EPI_ISL_996302, EPI_ISL_996303, EPI_ISL_996304, EPI_ISL_996305, EPI_ISL_996306, EPI_ISL_996307, EPI_ISL_996308, EPI_ISL_996309, EPI_ISL_996310, EPI_ISL_996311, EPI_ISL_996312, EPI_ISL_996313, EPI_ISL_996314, EPI_ISL_996315, EPI_ISL_996317, EPI_ISL_996318, EPI_ISL_996319, EPI_ISL_996320, EPI_ISL_996321, EPI_ISL_996322, EPI_ISL_996323, EPI_ISL_996324, EPI_ISL_996325, EPI_ISL_996326, EPI_ISL_996327, EPI_ISL_996328, EPI_ISL_996329, EPI_ISL_996330, EPI_ISL_996331, EPI_ISL_996332, EPI_ISL_996333, EPI_ISL_996334, EPI_ISL_996335, EPI_ISL_996336, EPI_ISL_996337, EPI_ISL_996338, EPI_ISL_996339, EPI_ISL_996340, EPI_ISL_996341, EPI_ISL_996343, EPI_ISL_996344, EPI_ISL_996345, EPI_ISL_996346, EPI_ISL_996347, EPI_ISL_996348, EPI_ISL_996349, EPI_ISL_996350, EPI_ISL_996351, EPI_ISL_996352, EPI_ISL_996353, EPI_ISL_996354, EPI_ISL_996355, EPI_ISL_996356, EPI_ISL_996357, EPI_ISL_996358, EPI_ISL_996359, EPI_ISL_996360, EPI_ISL_996361, EPI_ISL_996362, EPI_ISL_996363, EPI_ISL_996364, EPI_ISL_996365, EPI_ISL_996366, EPI_ISL_996367, EPI_ISL_996368, EPI_ISL_996369, EPI_ISL_996370, EPI_ISL_996371, EPI_ISL_996372, EPI_ISL_996373, EPI_ISL_996374, EPI_ISL_996375, EPI_ISL_996376, EPI_ISL_996377, EPI_ISL_996378, EPI_ISL_996379, EPI_ISL_996380, EPI_ISL_996381, EPI_ISL_996382, EPI_ISL_996383, EPI_ISL_996384, EPI_ISL_996385, EPI_ISL_996386, EPI_ISL_996387, EPI_ISL_996388 | see above | Quadram Institute Bioscience                                                                                                                                                                                        | COVID-19 Genomics UK (COG-UK) Consortium | Dave J. Baker, Gemma L. Kay, Alp Aydin, Thanh Le-Viet, Steven Rudder, Ana P. Tedim, Anastasia Kolyva, Maria Diaz, Leonardo de Oliveira Martins, Nabil-Fareed Alkhan, Lizzie Meadows, Rachael Stanley, Ngozi Elumogo, Muhammed Yasir, Nicholas M. Thomson, Alexander J Trotter, Rachel Gilroy, Samuel Bloomfield, Claire E Stuart, Andrew Bell, Reesh Prakash, Samir Dervisic, Alison E. Mathar, John Wain, Mark Webber, Andrew J. Page, Justin O'Grady |
| EPI_ISL_996424, EPI_ISL_996441                                                                                                                                                                                                                                                                                                                                                                                                                                                                                                                                                                                                                                                                                                                                                                                                                                                                                                                                                                                                                                                                                                                                                                                                                                                                                                                                                                                                                                                                                                                                                                                                                                                                                                                                                                                                                                                                                                                                                                                                                                                                                                                                                                                                                                                                                                                                                                                                                                                                                                                                                                                                                                                                                                                                                                                                                                                                                                                                                                                                                                                                                                                                                                                                                                                                                                                                                                                                                                                                                                                                                                                                                                                                                                                                                                                                                                                                                                                                                                                                                                                                                                                                                                                                                                                                                                                                                                                                                                                                                                                                                                                                                                                                 |           | University of Birmingham                                                                                                                                                                                            | COVID-19 Genomics UK (COG-UK) Consortium | Institute of Microbiology, University of Birmingham: Claire McMurray, Joanne Stockton, Samuel Nicholls, Radoslaw Poplawski, Will Rowe, Josh Quick, Nicholas Loman, University of Birmingham Testing Laboratory: Celina M Whalley, Andrew Bosworth, Charlotte Poxon, Kasun Wanigasooriya, Oliver Pickles, Mike Kidd, Alex Richter, Andrew D Begg's PHE Heartlands Lab: Husam Osman, Andrew Bosworth. Queen Elizabeth Hospital: Anna Casey               |
| EPI_ISL_996483, EPI_ISL_996485, EPI_ISL_996490, EPI_ISL_996492, EPI_ISL_996493, EPI_ISL_996494, EPI_ISL_996495, EPI_ISL_996496, EPI_ISL_996497, EPI_ISL_996498, EPI_ISL_996499, EPI_ISL_996506, EPI_ISL_996507, EPI_ISL_996509, EPI_ISL_996510, EPI_ISL_996512, EPI_ISL_996513                                                                                                                                                                                                                                                                                                                                                                                                                                                                                                                                                                                                                                                                                                                                                                                                                                                                                                                                                                                                                                                                                                                                                                                                                                                                                                                                                                                                                                                                                                                                                                                                                                                                                                                                                                                                                                                                                                                                                                                                                                                                                                                                                                                                                                                                                                                                                                                                                                                                                                                                                                                                                                                                                                                                                                                                                                                                                                                                                                                                                                                                                                                                                                                                                                                                                                                                                                                                                                                                                                                                                                                                                                                                                                                                                                                                                                                                                                                                                                                                                                                                                                                                                                                                                                                                                                                                                                                                                 | see above | University of Exeter                                                                                                                                                                                                | COVID-19 Genomics UK (COG-UK) Consortium | Ben Temperton, Aaron Jeffries, Michelle Michelsen, Joanna Warwick-Dugdale, Audrey Farbos, Robyn Manley, Stephen Michell, Jane Masoli                                                                                                                                                                                                                                                                                                                   |
| EPI_ISL_996627, EPI_ISL_996630, EPI_ISL_996672, EPI_ISL_996674, EPI_ISL_996678, EPI_ISL_996681, EPI_ISL_996683, EPI_ISL_996684, EPI_ISL_996685, EPI_ISL_996689, EPI_ISL_996690, EPI_ISL_996694, EPI_ISL_996695, EPI_ISL_996696, EPI_ISL_996704, EPI_ISL_996707, EPI_ISL_996708, EPI_ISL_996712, EPI_ISL_996719, EPI_ISL_996724, EPI_ISL_996726, EPI_ISL_996728, EPI_ISL_996730, EPI_ISL_996735, EPI_ISL_996737, EPI_ISL_996741, EPI_ISL_996742, EPI_ISL_996778, EPI_ISL_996791, EPI_ISL_996807, EPI_ISL_996834, EPI_ISL_996852, EPI_ISL_996853                                                                                                                                                                                                                                                                                                                                                                                                                                                                                                                                                                                                                                                                                                                                                                                                                                                                                                                                                                                                                                                                                                                                                                                                                                                                                                                                                                                                                                                                                                                                                                                                                                                                                                                                                                                                                                                                                                                                                                                                                                                                                                                                                                                                                                                                                                                                                                                                                                                                                                                                                                                                                                                                                                                                                                                                                                                                                                                                                                                                                                                                                                                                                                                                                                                                                                                                                                                                                                                                                                                                                                                                                                                                                                                                                                                                                                                                                                                                                                                                                                                                                                                                                 | see above | Department of Pathology, University of Cambridge                                                                                                                                                                    | COVID-19 Genomics UK (COG-UK) Consortium | Aminu S. Jahun, Yasmin Chaudhry, Iliana Georgana, Myra Hosmillo, Rhys Izuaqbe, William L. Hamilton, Martin D. Curran, Surendra Parmar, Ian Goodfellow                                                                                                                                                                                                                                                                                                  |
| EPI_ISL_997118, EPI_ISL_997119                                                                                                                                                                                                                                                                                                                                                                                                                                                                                                                                                                                                                                                                                                                                                                                                                                                                                                                                                                                                                                                                                                                                                                                                                                                                                                                                                                                                                                                                                                                                                                                                                                                                                                                                                                                                                                                                                                                                                                                                                                                                                                                                                                                                                                                                                                                                                                                                                                                                                                                                                                                                                                                                                                                                                                                                                                                                                                                                                                                                                                                                                                                                                                                                                                                                                                                                                                                                                                                                                                                                                                                                                                                                                                                                                                                                                                                                                                                                                                                                                                                                                                                                                                                                                                                                                                                                                                                                                                                                                                                                                                                                                                                                 |           | Virology Department, Royal Infirmary of Edinburgh, NHS Lothian / School of Biological Sciences, University of Edinburgh                                                                                             | COVID-19 Genomics UK (COG-UK) Consortium | McHugh M, Dewar R, Cotton S, Rooke S, O'Toole Á, Scher E, Hill V, McCrone JT, Colquhoun R, Yu X, Jackson B, Rambaut A, Templeton K                                                                                                                                                                                                                                                                                                                     |
| EPI_ISL_997209, EPI_ISL_997210, EPI_ISL_997211, EPI_ISL_997212, EPI_ISL_997213, EPI_ISL_997214, EPI_ISL_997215, EPI_ISL_997217, EPI_ISL_997218, EPI_ISL_997219, EPI_ISL_997220, EPI_ISL_997221, EPI_ISL_997222, EPI_ISL_997223, EPI_ISL_997224, EPI_ISL_997225, EPI_ISL_997226, EPI_ISL_997227, EPI_ISL_997228, EPI_ISL_997229, EPI_ISL_997230, EPI_ISL_997231, EPI_ISL_997232, EPI_ISL_997233, EPI_ISL_997234, EPI_ISL_997235, EPI_ISL_997236, EPI_ISL_997237, EPI_ISL_997238, EPI_ISL_997240, EPI_ISL_997241, EPI_ISL_997242, EPI_ISL_997243, EPI_ISL_997244, EPI_ISL_997245, EPI_ISL_997246, EPI_ISL_997247, EPI_ISL_997248, EPI_ISL_997249, EPI_ISL_997285, EPI_ISL_997347, EPI_ISL_997366                                                                                                                                                                                                                                                                                                                                                                                                                                                                                                                                                                                                                                                                                                                                                                                                                                                                                                                                                                                                                                                                                                                                                                                                                                                                                                                                                                                                                                                                                                                                                                                                                                                                                                                                                                                                                                                                                                                                                                                                                                                                                                                                                                                                                                                                                                                                                                                                                                                                                                                                                                                                                                                                                                                                                                                                                                                                                                                                                                                                                                                                                                                                                                                                                                                                                                                                                                                                                                                                                                                                                                                                                                                                                                                                                                                                                                                                                                                                                                                                 | see above | University of Exeter                                                                                                                                                                                                | COVID-19 Genomics UK (COG-UK) Consortium | Ben Temperton, Aaron Jeffries, Michelle Michelsen, Joanna Warwick-Dugdale, Audrey Farbos, Robyn Manley, Stephen Michell, Jane Masoli                                                                                                                                                                                                                                                                                                                   |
| EPI_ISL_997579, EPI_ISL_997580, EPI_ISL_997581, EPI_ISL_997582, EPI_ISL_997583, EPI_ISL_997584, EPI_ISL_997585, EPI_ISL_997586, EPI_ISL_997587, EPI_ISL_997588, EPI_ISL_997589, EPI_ISL_997590, EPI_ISL_997591, EPI_ISL_997592, EPI_ISL_997593, EPI_ISL_997594, EPI_ISL_997595, EPI_ISL_997597, EPI_ISL_997598, EPI_ISL_997599, EPI_ISL_997600, EPI_ISL_997601, EPI_ISL_997602, EPI_ISL_997603, EPI_ISL_997604, EPI_ISL_997605, EPI_ISL_997606, EPI_ISL_997607, EPI_ISL_997608, EPI_ISL_997609, EPI_ISL_997610, EPI_ISL_997611, EPI_ISL_997612, EPI_ISL_997613                                                                                                                                                                                                                                                                                                                                                                                                                                                                                                                                                                                                                                                                                                                                                                                                                                                                                                                                                                                                                                                                                                                                                                                                                                                                                                                                                                                                                                                                                                                                                                                                                                                                                                                                                                                                                                                                                                                                                                                                                                                                                                                                                                                                                                                                                                                                                                                                                                                                                                                                                                                                                                                                                                                                                                                                                                                                                                                                                                                                                                                                                                                                                                                                                                                                                                                                                                                                                                                                                                                                                                                                                                                                                                                                                                                                                                                                                                                                                                                                                                                                                                                                 | see above | University College London, Great Ormond Street Hospital for Children NHS Foundation Trust, Imperial College Healthcare NHS Trust                                                                                    | COVID-19 Genomics UK (COG-UK) Consortium | Sergi Castellano, Rachel Williams, Mark Kristiansen, Paola Resende Silva, Suanado Roy, Tony Brooks, Helena Tutill, Paola Niola, Patricia Dyal, Charlotte Williams, Leysa Forrest, Yasmin Panchbhaya, Jacqueline Findlay, Samuel Weeks, Julianne Brown, Kathryn Harris, Paul Randall, James Price, Alison Holmes, Judith Breuer                                                                                                                         |
| EPI_ISL_998138, EPI_ISL_998139, EPI_ISL_998141, EPI_ISL_998142, EPI_ISL_998143, EPI_ISL_998305, EPI_ISL_998306, EPI_ISL_998307, EPI_ISL_998308                                                                                                                                                                                                                                                                                                                                                                                                                                                                                                                                                                                                                                                                                                                                                                                                                                                                                                                                                                                                                                                                                                                                                                                                                                                                                                                                                                                                                                                                                                                                                                                                                                                                                                                                                                                                                                                                                                                                                                                                                                                                                                                                                                                                                                                                                                                                                                                                                                                                                                                                                                                                                                                                                                                                                                                                                                                                                                                                                                                                                                                                                                                                                                                                                                                                                                                                                                                                                                                                                                                                                                                                                                                                                                                                                                                                                                                                                                                                                                                                                                                                                                                                                                                                                                                                                                                                                                                                                                                                                                                                                 |           | Regional Virus Laboratory, Belfast Health and Social Care Trust                                                                                                                                                     | COVID-19 Genomics UK (COG-UK) Consortium | Conall McCaughey, James McKenna, Tanya Curran, Susan Feeney, Alison Watt, Ciara Cox, Mairead Connor, Zoltan Molnar, David Simpson, Derek Fairley                                                                                                                                                                                                                                                                                                       |
| EPI_ISL_998315, EPI_ISL_998322, EPI_ISL_998461, EPI_ISL_998462, EPI_ISL_998463, EPI_ISL_998492, EPI_ISL_998505, EPI_ISL_998506, EPI_ISL_998517, EPI_ISL_998520, EPI_ISL_998525, EPI_ISL_998536, EPI_ISL_998537, EPI_ISL_998538, EPI_ISL_998539, EPI_ISL_998540, EPI_ISL_998541, EPI_ISL_998545, EPI_ISL_998547, EPI_ISL_998548, EPI_ISL_998549, EPI_ISL_998550, EPI_ISL_998551                                                                                                                                                                                                                                                                                                                                                                                                                                                                                                                                                                                                                                                                                                                                                                                                                                                                                                                                                                                                                                                                                                                                                                                                                                                                                                                                                                                                                                                                                                                                                                                                                                                                                                                                                                                                                                                                                                                                                                                                                                                                                                                                                                                                                                                                                                                                                                                                                                                                                                                                                                                                                                                                                                                                                                                                                                                                                                                                                                                                                                                                                                                                                                                                                                                                                                                                                                                                                                                                                                                                                                                                                                                                                                                                                                                                                                                                                                                                                                                                                                                                                                                                                                                                                                                                                                                 | see above | Northumbria University / South Tees Hospitals NHS Foundation Trust / North Cumbria Integrated Care NHS Foundation Trust / North Tees and Hartlepool NHS Foundation Trust / Newcastle Hospitals NHS Foundation Trust | COVID-19 Genomics UK (COG-UK) Consortium | Darren L Smith, Andrew Nelson, Matthew Bashton, Greg R Young, Joshua Loh, John Allan, Mohammad A Tariq, Giles S Holt, Gary Black, Wen C Yew, Lynn Dover, Paul Baker, Steve Liggett, Sarah Essex, Jane Greenaway, Debra Padgett, Clive Graham, Garren Scott, Edward Barton, Emma Swindells, Brendan Payne, Jennifer Collins, Yusrì Taha, Gary Eltringham                                                                                                |
| EPI_ISL_998926, EPI_ISL_998927, EPI_ISL_998928, EPI_ISL_998929, EPI_ISL_998930, EPI_ISL_998931,                                                                                                                                                                                                                                                                                                                                                                                                                                                                                                                                                                                                                                                                                                                                                                                                                                                                                                                                                                                                                                                                                                                                                                                                                                                                                                                                                                                                                                                                                                                                                                                                                                                                                                                                                                                                                                                                                                                                                                                                                                                                                                                                                                                                                                                                                                                                                                                                                                                                                                                                                                                                                                                                                                                                                                                                                                                                                                                                                                                                                                                                                                                                                                                                                                                                                                                                                                                                                                                                                                                                                                                                                                                                                                                                                                                                                                                                                                                                                                                                                                                                                                                                                                                                                                                                                                                                                                                                                                                                                                                                                                                                |           | Lincolnshire Hospitals and DeepSeq Nottingham                                                                                                                                                                       | COVID-19 Genomics UK (COG-UK) Consortium | Nichola Duckworth, Tim Sloan, Sarah Walsh, Jonathan Ball, Patrick McClure, Joseph Chappell, Nadine Holmes, Matthew Carlisle, Christopher Moore, Fei Sang, Johnny Debebe, Victoria Wright, Matthew Loose                                                                                                                                                                                                                                                |

|                                                                     |                                                                                                                      |                                          |                                                                                                                                                                                                                                                                                                       |
|---------------------------------------------------------------------|----------------------------------------------------------------------------------------------------------------------|------------------------------------------|-------------------------------------------------------------------------------------------------------------------------------------------------------------------------------------------------------------------------------------------------------------------------------------------------------|
| EPI_ISL_998932, EPI_ISL_998933,<br>EPI_ISL_998934<br>EPI_ISL_998991 | Oxford Viromics, NDM, University of Oxford; Oxford University<br>Hospitals; Basingstoke and North Hampshire Hospital | COVID-19 Genomics UK (COG-UK) Consortium | Tanya Golubchik, David Bonsall, George Macintyre, Amy Trebes, Mariateresa de Cesare, Catrin Moore, Alex Mobbs, Anita Justice, Robert Shaw, Monique Andersson, Timothy Peto, Emma Wise, Nathan Moore, Jessica Lynch, Nick Cortes, Matilde Mori, Stephen Kidd, David Buck, John Todd, Christophe Fraser |
|---------------------------------------------------------------------|----------------------------------------------------------------------------------------------------------------------|------------------------------------------|-------------------------------------------------------------------------------------------------------------------------------------------------------------------------------------------------------------------------------------------------------------------------------------------------------|
