# Supplementary material for: Inferring the Association between the Risk of COVID-19 Case Fatality and N501Y Substitution in SARS-CoV-2
Source: MDPI journal article supplement (doi:10.3390/v13040638), 2021-04-08
Supplement: s1 [file s1]

We gratefully acknowledge the following Authors from the Originating laboratories responsible for obtaining the specimens, as well as the Submitting laboratories where the genome data were generated and shared via GISAID, on which this research is based.

All Submitters of data may be contacted directly via [www.gisaid.org](http://www.gisaid.org)

Authors are sorted alphabetically.

| Accession ID                                                                                                                                                                                                                                                                                                                                                                                                                                                                                                                                                                                                                                                                                                                                                                                                                                                                                                                                                                                                                                                                                                                                                                                                                                                                                                                                                                                                                                                                                                                                                                                                                                                                                                                                                                                                                                                                                                                                                                                                                                                                                                                                                                                                                                                                                                                                                                                                                                                                                                                                                                                                                                                                                                                                                                                                                                                                                                                                                                                                                                                                                                                                                                                                                                                                                                                                                                                                                                                                                                                                                                                                                                                                                                                                                                                                                                                                                                                                                                                                                                                                                                                                                                                                                                                                                                                                                                                                                                                                                                                                                                                                                                                                                                                                                                                                                    | Originating Laboratory                                                                                                                                                           | Submitting Laboratory                                                      | Authors                                                                                                                                                                                                                                                                                                                                                                                                                                 |
|---------------------------------------------------------------------------------------------------------------------------------------------------------------------------------------------------------------------------------------------------------------------------------------------------------------------------------------------------------------------------------------------------------------------------------------------------------------------------------------------------------------------------------------------------------------------------------------------------------------------------------------------------------------------------------------------------------------------------------------------------------------------------------------------------------------------------------------------------------------------------------------------------------------------------------------------------------------------------------------------------------------------------------------------------------------------------------------------------------------------------------------------------------------------------------------------------------------------------------------------------------------------------------------------------------------------------------------------------------------------------------------------------------------------------------------------------------------------------------------------------------------------------------------------------------------------------------------------------------------------------------------------------------------------------------------------------------------------------------------------------------------------------------------------------------------------------------------------------------------------------------------------------------------------------------------------------------------------------------------------------------------------------------------------------------------------------------------------------------------------------------------------------------------------------------------------------------------------------------------------------------------------------------------------------------------------------------------------------------------------------------------------------------------------------------------------------------------------------------------------------------------------------------------------------------------------------------------------------------------------------------------------------------------------------------------------------------------------------------------------------------------------------------------------------------------------------------------------------------------------------------------------------------------------------------------------------------------------------------------------------------------------------------------------------------------------------------------------------------------------------------------------------------------------------------------------------------------------------------------------------------------------------------------------------------------------------------------------------------------------------------------------------------------------------------------------------------------------------------------------------------------------------------------------------------------------------------------------------------------------------------------------------------------------------------------------------------------------------------------------------------------------------------------------------------------------------------------------------------------------------------------------------------------------------------------------------------------------------------------------------------------------------------------------------------------------------------------------------------------------------------------------------------------------------------------------------------------------------------------------------------------------------------------------------------------------------------------------------------------------------------------------------------------------------------------------------------------------------------------------------------------------------------------------------------------------------------------------------------------------------------------------------------------------------------------------------------------------------------------------------------------------------------------------------------------------------------|----------------------------------------------------------------------------------------------------------------------------------------------------------------------------------|----------------------------------------------------------------------------|-----------------------------------------------------------------------------------------------------------------------------------------------------------------------------------------------------------------------------------------------------------------------------------------------------------------------------------------------------------------------------------------------------------------------------------------|
| EPI_ISL_1000190, EPI_ISL_1000199, EPI_ISL_1000289, EPI_ISL_1000291, EPI_ISL_1000295, EPI_ISL_1000296, EPI_ISL_1000297, EPI_ISL_1000298, EPI_ISL_1000309, EPI_ISL_1000310, EPI_ISL_1000315, EPI_ISL_1000317, EPI_ISL_1000320, EPI_ISL_1000463, EPI_ISL_1000464, EPI_ISL_1000477, EPI_ISL_1000596, EPI_ISL_1000598, EPI_ISL_1000611, EPI_ISL_1000612, EPI_ISL_1000613, EPI_ISL_1000628, EPI_ISL_1000629, EPI_ISL_1000630                                                                                                                                                                                                                                                                                                                                                                                                                                                                                                                                                                                                                                                                                                                                                                                                                                                                                                                                                                                                                                                                                                                                                                                                                                                                                                                                                                                                                                                                                                                                                                                                                                                                                                                                                                                                                                                                                                                                                                                                                                                                                                                                                                                                                                                                                                                                                                                                                                                                                                                                                                                                                                                                                                                                                                                                                                                                                                                                                                                                                                                                                                                                                                                                                                                                                                                                                                                                                                                                                                                                                                                                                                                                                                                                                                                                                                                                                                                                                                                                                                                                                                                                                                                                                                                                                                                                                                                                          |                                                                                                                                                                                  |                                                                            |                                                                                                                                                                                                                                                                                                                                                                                                                                         |
| see above                                                                                                                                                                                                                                                                                                                                                                                                                                                                                                                                                                                                                                                                                                                                                                                                                                                                                                                                                                                                                                                                                                                                                                                                                                                                                                                                                                                                                                                                                                                                                                                                                                                                                                                                                                                                                                                                                                                                                                                                                                                                                                                                                                                                                                                                                                                                                                                                                                                                                                                                                                                                                                                                                                                                                                                                                                                                                                                                                                                                                                                                                                                                                                                                                                                                                                                                                                                                                                                                                                                                                                                                                                                                                                                                                                                                                                                                                                                                                                                                                                                                                                                                                                                                                                                                                                                                                                                                                                                                                                                                                                                                                                                                                                                                                                                                                       | Centre for Enzyme Innovation, University of Portsmouth / Translational Research Laboratory, Portsmouth Hospitals NHS Trust                                                       | COVID-19 Genomics UK (COG-UK) Consortium                                   | Angela Beckett,Salman Goudarzi,Christopher Fearn,Kate Cook,Katie Loveson,Sharon Glaysher,Scott Elliott,Samuel Robson                                                                                                                                                                                                                                                                                                                    |
| EPI_ISL_1000653                                                                                                                                                                                                                                                                                                                                                                                                                                                                                                                                                                                                                                                                                                                                                                                                                                                                                                                                                                                                                                                                                                                                                                                                                                                                                                                                                                                                                                                                                                                                                                                                                                                                                                                                                                                                                                                                                                                                                                                                                                                                                                                                                                                                                                                                                                                                                                                                                                                                                                                                                                                                                                                                                                                                                                                                                                                                                                                                                                                                                                                                                                                                                                                                                                                                                                                                                                                                                                                                                                                                                                                                                                                                                                                                                                                                                                                                                                                                                                                                                                                                                                                                                                                                                                                                                                                                                                                                                                                                                                                                                                                                                                                                                                                                                                                                                 | Virology Department, Sheffield Teaching Hospitals NHS Foundation Trust/Department of Infection, Immunity and Cardiovascular Disease, The Medical School, University of Sheffield | COVID-19 Genomics UK (COG-UK) Consortium                                   | Thushan de Silva, Matthew Parker, Nikki Smith, Adri Angyal, Rebecca Brown, Luke Green, Rachel Tucker, Paul Parsons, Danielle Groves, Katie Johnson, Laura Carrilero, Alex Keeley, Dave Partridge, Matthew Wyles, Benjamin Lindsey, Mehmet Yavuz, Mohammad Raza, Cariad Evans                                                                                                                                                            |
| EPI_ISL_1000842, EPI_ISL_1000846, EPI_ISL_1000852, EPI_ISL_1000854, EPI_ISL_1000856, EPI_ISL_1000864                                                                                                                                                                                                                                                                                                                                                                                                                                                                                                                                                                                                                                                                                                                                                                                                                                                                                                                                                                                                                                                                                                                                                                                                                                                                                                                                                                                                                                                                                                                                                                                                                                                                                                                                                                                                                                                                                                                                                                                                                                                                                                                                                                                                                                                                                                                                                                                                                                                                                                                                                                                                                                                                                                                                                                                                                                                                                                                                                                                                                                                                                                                                                                                                                                                                                                                                                                                                                                                                                                                                                                                                                                                                                                                                                                                                                                                                                                                                                                                                                                                                                                                                                                                                                                                                                                                                                                                                                                                                                                                                                                                                                                                                                                                            | Bioinformatics and Biostatistics Lab, Advanced Sequencing Facility                                                                                                               | COVID-19 Genomics UK (COG-UK) Consortium                                   | Aengus Stewart,Jerome Nicod,Chelsea Sawyer,Laura Cubitt,Harshil Patel,Margaret Crawford                                                                                                                                                                                                                                                                                                                                                 |
| EPI_ISL_1006546, EPI_ISL_1006960, EPI_ISL_1006971, EPI_ISL_1007015, EPI_ISL_1007022, EPI_ISL_1007083                                                                                                                                                                                                                                                                                                                                                                                                                                                                                                                                                                                                                                                                                                                                                                                                                                                                                                                                                                                                                                                                                                                                                                                                                                                                                                                                                                                                                                                                                                                                                                                                                                                                                                                                                                                                                                                                                                                                                                                                                                                                                                                                                                                                                                                                                                                                                                                                                                                                                                                                                                                                                                                                                                                                                                                                                                                                                                                                                                                                                                                                                                                                                                                                                                                                                                                                                                                                                                                                                                                                                                                                                                                                                                                                                                                                                                                                                                                                                                                                                                                                                                                                                                                                                                                                                                                                                                                                                                                                                                                                                                                                                                                                                                                            | Lighthouse Lab in Milton Keynes                                                                                                                                                  | Wellcome Sanger Institute for the COVID-19 Genomics UK (COG-UK) Consortium | The Lighthouse Lab in Milton Keynes and Alex Alderton, Roberto Amato, Sonia Goncalves, Ewan Harrison, David K. Jackson, Ian Johnston, Dominic Kwiatkowski, Cordelia Langford, John Sillitoe on behalf of the Wellcome Sanger Institute COVID-19 Surveillance Team                                                                                                                                                                       |
| EPI_ISL_1007440, EPI_ISL_1007441, EPI_ISL_1007442, EPI_ISL_1007443, EPI_ISL_1007444                                                                                                                                                                                                                                                                                                                                                                                                                                                                                                                                                                                                                                                                                                                                                                                                                                                                                                                                                                                                                                                                                                                                                                                                                                                                                                                                                                                                                                                                                                                                                                                                                                                                                                                                                                                                                                                                                                                                                                                                                                                                                                                                                                                                                                                                                                                                                                                                                                                                                                                                                                                                                                                                                                                                                                                                                                                                                                                                                                                                                                                                                                                                                                                                                                                                                                                                                                                                                                                                                                                                                                                                                                                                                                                                                                                                                                                                                                                                                                                                                                                                                                                                                                                                                                                                                                                                                                                                                                                                                                                                                                                                                                                                                                                                             | Lighthouse Lab in Alderley Park                                                                                                                                                  | Wellcome Sanger Institute for the COVID-19 Genomics UK (COG-UK) Consortium | Jacquelyn Wynn, Mairead Hyland, The Lighthouse Lab in Alderley Park and Alex Alderton, Roberto Amato, Sonia Goncalves, Ewan Harrison, David K. Jackson, Ian Johnston, Dominic Kwiatkowski, Cordelia Langford, John Sillitoe on behalf of the Wellcome Sanger Institute COVID-19 Surveillance Team                                                                                                                                       |
| EPI_ISL_1007527                                                                                                                                                                                                                                                                                                                                                                                                                                                                                                                                                                                                                                                                                                                                                                                                                                                                                                                                                                                                                                                                                                                                                                                                                                                                                                                                                                                                                                                                                                                                                                                                                                                                                                                                                                                                                                                                                                                                                                                                                                                                                                                                                                                                                                                                                                                                                                                                                                                                                                                                                                                                                                                                                                                                                                                                                                                                                                                                                                                                                                                                                                                                                                                                                                                                                                                                                                                                                                                                                                                                                                                                                                                                                                                                                                                                                                                                                                                                                                                                                                                                                                                                                                                                                                                                                                                                                                                                                                                                                                                                                                                                                                                                                                                                                                                                                 | Lighthouse Lab in Milton Keynes                                                                                                                                                  | Wellcome Sanger Institute for the COVID-19 Genomics UK (COG-UK) Consortium | The Lighthouse Lab in Milton Keynes and Alex Alderton, Roberto Amato, Sonia Goncalves, Ewan Harrison, David K. Jackson, Ian Johnston, Dominic Kwiatkowski, Cordelia Langford, John Sillitoe on behalf of the Wellcome Sanger Institute COVID-19 Surveillance Team                                                                                                                                                                       |
| EPI_ISL_1012695, EPI_ISL_1012696, EPI_ISL_1012697, EPI_ISL_1012698, EPI_ISL_1012699, EPI_ISL_1012700, EPI_ISL_1012702, EPI_ISL_1012703, EPI_ISL_1012704, EPI_ISL_1012705, EPI_ISL_1012706, EPI_ISL_1012707, EPI_ISL_1012708, EPI_ISL_1012709, EPI_ISL_1012710, EPI_ISL_1012711, EPI_ISL_1012712                                                                                                                                                                                                                                                                                                                                                                                                                                                                                                                                                                                                                                                                                                                                                                                                                                                                                                                                                                                                                                                                                                                                                                                                                                                                                                                                                                                                                                                                                                                                                                                                                                                                                                                                                                                                                                                                                                                                                                                                                                                                                                                                                                                                                                                                                                                                                                                                                                                                                                                                                                                                                                                                                                                                                                                                                                                                                                                                                                                                                                                                                                                                                                                                                                                                                                                                                                                                                                                                                                                                                                                                                                                                                                                                                                                                                                                                                                                                                                                                                                                                                                                                                                                                                                                                                                                                                                                                                                                                                                                                 |                                                                                                                                                                                  |                                                                            |                                                                                                                                                                                                                                                                                                                                                                                                                                         |
| see above                                                                                                                                                                                                                                                                                                                                                                                                                                                                                                                                                                                                                                                                                                                                                                                                                                                                                                                                                                                                                                                                                                                                                                                                                                                                                                                                                                                                                                                                                                                                                                                                                                                                                                                                                                                                                                                                                                                                                                                                                                                                                                                                                                                                                                                                                                                                                                                                                                                                                                                                                                                                                                                                                                                                                                                                                                                                                                                                                                                                                                                                                                                                                                                                                                                                                                                                                                                                                                                                                                                                                                                                                                                                                                                                                                                                                                                                                                                                                                                                                                                                                                                                                                                                                                                                                                                                                                                                                                                                                                                                                                                                                                                                                                                                                                                                                       | Lighthouse Lab in Alderley Park                                                                                                                                                  | Wellcome Sanger Institute for the COVID-19 Genomics UK (COG-UK) Consortium | Jacquelyn Wynn, Mairead Hyland, The Lighthouse Lab in Alderley Park and Alex Alderton, Roberto Amato, Sonia Goncalves, Ewan Harrison, David K. Jackson, Ian Johnston, Dominic Kwiatkowski, Cordelia Langford, John Sillitoe on behalf of the Wellcome Sanger Institute COVID-19 Surveillance Team                                                                                                                                       |
| EPI_ISL_1018766                                                                                                                                                                                                                                                                                                                                                                                                                                                                                                                                                                                                                                                                                                                                                                                                                                                                                                                                                                                                                                                                                                                                                                                                                                                                                                                                                                                                                                                                                                                                                                                                                                                                                                                                                                                                                                                                                                                                                                                                                                                                                                                                                                                                                                                                                                                                                                                                                                                                                                                                                                                                                                                                                                                                                                                                                                                                                                                                                                                                                                                                                                                                                                                                                                                                                                                                                                                                                                                                                                                                                                                                                                                                                                                                                                                                                                                                                                                                                                                                                                                                                                                                                                                                                                                                                                                                                                                                                                                                                                                                                                                                                                                                                                                                                                                                                 | Lighthouse Lab in Cambridge                                                                                                                                                      | Wellcome Sanger Institute for the COVID-19 Genomics UK (COG-UK) Consortium | Rob Howes, The Lighthouse Lab in Cambridge and Alex Alderton, Roberto Amato, Jeffrey Barrett, Sonia Goncalves, Ewan Harrison, David K. Jackson, Ian Johnston, Dominic Kwiatkowski, Cordelia Langford, John Sillitoe on behalf of the Wellcome Sanger Institute COVID-19 Surveillance Team                                                                                                                                               |
| EPI_ISL_1019586                                                                                                                                                                                                                                                                                                                                                                                                                                                                                                                                                                                                                                                                                                                                                                                                                                                                                                                                                                                                                                                                                                                                                                                                                                                                                                                                                                                                                                                                                                                                                                                                                                                                                                                                                                                                                                                                                                                                                                                                                                                                                                                                                                                                                                                                                                                                                                                                                                                                                                                                                                                                                                                                                                                                                                                                                                                                                                                                                                                                                                                                                                                                                                                                                                                                                                                                                                                                                                                                                                                                                                                                                                                                                                                                                                                                                                                                                                                                                                                                                                                                                                                                                                                                                                                                                                                                                                                                                                                                                                                                                                                                                                                                                                                                                                                                                 | Lighthouse Lab in Milton Keynes                                                                                                                                                  | Wellcome Sanger Institute for the COVID-19 Genomics UK (COG-UK) Consortium | The Lighthouse Lab in Milton Keynes and Alex Alderton, Roberto Amato, Jeffrey Barrett, Sonia Goncalves, Ewan Harrison, David K. Jackson, Ian Johnston, Dominic Kwiatkowski, Cordelia Langford, John Sillitoe on behalf of the Wellcome Sanger Institute COVID-19 Surveillance Team                                                                                                                                                      |
| EPI_ISL_1042058, EPI_ISL_1042251, EPI_ISL_1042338, EPI_ISL_1042647, EPI_ISL_1043383, EPI_ISL_1043484, EPI_ISL_1043552, EPI_ISL_1045289, EPI_ISL_1045471, EPI_ISL_1045793, EPI_ISL_1046166, EPI_ISL_1046338, EPI_ISL_1046341, EPI_ISL_1046347, EPI_ISL_1046352, EPI_ISL_1046354, EPI_ISL_1046355, EPI_ISL_1046357, EPI_ISL_1046359, EPI_ISL_1046361, EPI_ISL_1046365, EPI_ISL_1046366, EPI_ISL_1046375, EPI_ISL_1046381, EPI_ISL_1046394, EPI_ISL_1046396, EPI_ISL_1046402, EPI_ISL_1046404, EPI_ISL_1046409, EPI_ISL_1046411, EPI_ISL_1046435, EPI_ISL_1046440, EPI_ISL_1046442, EPI_ISL_1046449, EPI_ISL_1046474, EPI_ISL_1046491, EPI_ISL_1046493, EPI_ISL_1046495, EPI_ISL_1046504, EPI_ISL_1046507, EPI_ISL_1046508, EPI_ISL_1046510, EPI_ISL_1046513, EPI_ISL_1046514, EPI_ISL_1046515, EPI_ISL_1046516, EPI_ISL_1046517, EPI_ISL_1046518, EPI_ISL_1046519, EPI_ISL_1046520, EPI_ISL_1046521, EPI_ISL_1046522, EPI_ISL_1046523, EPI_ISL_1046524, EPI_ISL_1046525, EPI_ISL_1046526, EPI_ISL_1046527, EPI_ISL_1046528, EPI_ISL_1046529, EPI_ISL_1046530, EPI_ISL_1046531, EPI_ISL_1046532, EPI_ISL_1046533, EPI_ISL_1046534, EPI_ISL_1046535, EPI_ISL_1046536, EPI_ISL_1046537, EPI_ISL_1046538, EPI_ISL_1046539, EPI_ISL_1046541, EPI_ISL_1046542, EPI_ISL_1046544, EPI_ISL_1046546, EPI_ISL_1046547, EPI_ISL_1046548, EPI_ISL_1046549, EPI_ISL_1046550, EPI_ISL_1046551, EPI_ISL_1046552, EPI_ISL_1046553, EPI_ISL_1046554, EPI_ISL_1046555, EPI_ISL_1046556, EPI_ISL_1046557, EPI_ISL_1046558, EPI_ISL_1046559, EPI_ISL_1046560, EPI_ISL_1046561, EPI_ISL_1046562, EPI_ISL_1046563, EPI_ISL_1046564, EPI_ISL_1046565, EPI_ISL_1046566, EPI_ISL_1046567, EPI_ISL_1046568, EPI_ISL_1046569, EPI_ISL_1046570, EPI_ISL_1046571, EPI_ISL_1046572, EPI_ISL_1046573, EPI_ISL_1046574, EPI_ISL_1046575, EPI_ISL_1046577, EPI_ISL_1046578, EPI_ISL_1046580, EPI_ISL_1046581, EPI_ISL_1046582, EPI_ISL_1046583, EPI_ISL_1046584, EPI_ISL_1046585, EPI_ISL_1046586, EPI_ISL_1046587, EPI_ISL_1046588, EPI_ISL_1046589, EPI_ISL_1046590, EPI_ISL_1046592, EPI_ISL_1046593, EPI_ISL_1046594, EPI_ISL_1046595, EPI_ISL_1046596, EPI_ISL_1046597, EPI_ISL_1046598, EPI_ISL_1046599, EPI_ISL_1046601, EPI_ISL_1046602, EPI_ISL_1046603, EPI_ISL_1046604, EPI_ISL_1046605, EPI_ISL_1046606, EPI_ISL_1046607, EPI_ISL_1046609, EPI_ISL_1046611, EPI_ISL_1046612, EPI_ISL_1046614, EPI_ISL_1046615, EPI_ISL_1046618, EPI_ISL_1046619, EPI_ISL_1046620, EPI_ISL_1046621, EPI_ISL_1046622, EPI_ISL_1046623, EPI_ISL_1046624, EPI_ISL_1046626, EPI_ISL_1046628, EPI_ISL_1046629, EPI_ISL_1046631, EPI_ISL_1046632, EPI_ISL_1046633, EPI_ISL_1046635, EPI_ISL_1046636, EPI_ISL_1046637, EPI_ISL_1046638, EPI_ISL_1046639, EPI_ISL_1046641, EPI_ISL_1046642, EPI_ISL_1046643, EPI_ISL_1046644, EPI_ISL_1046645, EPI_ISL_1046646, EPI_ISL_1046647, EPI_ISL_1046648, EPI_ISL_1046649, EPI_ISL_1046650, EPI_ISL_1046651, EPI_ISL_1046652, EPI_ISL_1046653, EPI_ISL_1046654, EPI_ISL_1046655, EPI_ISL_1046656, EPI_ISL_1046657, EPI_ISL_1046658, EPI_ISL_1046659, EPI_ISL_1046660, EPI_ISL_1046661, EPI_ISL_1046662, EPI_ISL_1046663, EPI_ISL_1046664, EPI_ISL_1046665, EPI_ISL_1046666, EPI_ISL_1046667, EPI_ISL_1046668, EPI_ISL_1046669, EPI_ISL_1046670, EPI_ISL_1046671, EPI_ISL_1046672, EPI_ISL_1046673, EPI_ISL_1046674, EPI_ISL_1046675, EPI_ISL_1046676, EPI_ISL_1046677, EPI_ISL_1046678, EPI_ISL_1046679, EPI_ISL_1046680, EPI_ISL_1046681, EPI_ISL_1046682, EPI_ISL_1046683, EPI_ISL_1046684, EPI_ISL_1046685, EPI_ISL_1046686, EPI_ISL_1046687, EPI_ISL_1046688, EPI_ISL_1046689, EPI_ISL_1046690, EPI_ISL_1046691, EPI_ISL_1046692, EPI_ISL_1046693, EPI_ISL_1046694, EPI_ISL_1046695, EPI_ISL_1046696, EPI_ISL_1046697, EPI_ISL_1046698, EPI_ISL_1046699, EPI_ISL_1046700, EPI_ISL_1046701, EPI_ISL_1046702, EPI_ISL_1046703, EPI_ISL_1046704, EPI_ISL_1046705, EPI_ISL_1046706, EPI_ISL_1046707, EPI_ISL_1046708, EPI_ISL_1046709, EPI_ISL_1046710, EPI_ISL_1046711, EPI_ISL_1046712, EPI_ISL_1046713, EPI_ISL_1046714, EPI_ISL_1046715, EPI_ISL_1046716, EPI_ISL_1046717, EPI_ISL_1046718, EPI_ISL_1046719, EPI_ISL_1046720, EPI_ISL_1046721, EPI_ISL_1046722, EPI_ISL_1046723, EPI_ISL_1046724, EPI_ISL_1046725, EPI_ISL_1046726, EPI_ISL_1046727, EPI_ISL_1046728, EPI_ISL_1046729, EPI_ISL_1046730, EPI_ISL_1046731, EPI_ISL_1046732, EPI_ISL_1046733, EPI_ISL_1046734, EPI_ISL_1046735, EPI_ISL_1046736, EPI_ISL_1046737, EPI_ISL_1046738, EPI_ISL_1046739, EPI_ISL_1046740, EPI_ISL_1046741, EPI_ISL_1046742, EPI_ISL_1046743, EPI_ISL_1046744, EPI_ISL_1046745, EPI_ISL_1046746, EPI_ISL_1046747, EPI_ISL_1046748, EPI_ISL_1046749, EPI_ISL_1046750, EPI_ISL_1046751, EPI_ISL_1046752, EPI_ISL_1046753, EPI_ISL_1046754, EPI_ISL_1046755, EPI_ISL_1046756, EPI_ISL_1046757, EPI_ISL_1046758, EPI_ISL_1046759, EPI_ISL_1046760 |                                                                                                                                                                                  |                                                                            |                                                                                                                                                                                                                                                                                                                                                                                                                                         |
| see above                                                                                                                                                                                                                                                                                                                                                                                                                                                                                                                                                                                                                                                                                                                                                                                                                                                                                                                                                                                                                                                                                                                                                                                                                                                                                                                                                                                                                                                                                                                                                                                                                                                                                                                                                                                                                                                                                                                                                                                                                                                                                                                                                                                                                                                                                                                                                                                                                                                                                                                                                                                                                                                                                                                                                                                                                                                                                                                                                                                                                                                                                                                                                                                                                                                                                                                                                                                                                                                                                                                                                                                                                                                                                                                                                                                                                                                                                                                                                                                                                                                                                                                                                                                                                                                                                                                                                                                                                                                                                                                                                                                                                                                                                                                                                                                                                       | Randox Laboratories                                                                                                                                                              | Wellcome Sanger Institute for the COVID-19 Genomics UK (COG-UK) Consortium | Randox Laboratories and Alex Alderton, Roberto Amato, Jeffrey Barrett, Sonia Goncalves, Ewan Harrison, David K. Jackson, Ian Johnston, Dominic Kwiatkowski, Cordelia Langford, John Sillitoe on behalf of the Wellcome Sanger Institute COVID-19 Surveillance Team                                                                                                                                                                      |
| EPI_ISL_1047012, EPI_ISL_1047014, EPI_ISL_1047021, EPI_ISL_1047037, EPI_ISL_1047041, EPI_ISL_1047055, EPI_ISL_1047056                                                                                                                                                                                                                                                                                                                                                                                                                                                                                                                                                                                                                                                                                                                                                                                                                                                                                                                                                                                                                                                                                                                                                                                                                                                                                                                                                                                                                                                                                                                                                                                                                                                                                                                                                                                                                                                                                                                                                                                                                                                                                                                                                                                                                                                                                                                                                                                                                                                                                                                                                                                                                                                                                                                                                                                                                                                                                                                                                                                                                                                                                                                                                                                                                                                                                                                                                                                                                                                                                                                                                                                                                                                                                                                                                                                                                                                                                                                                                                                                                                                                                                                                                                                                                                                                                                                                                                                                                                                                                                                                                                                                                                                                                                           | University of Birmingham                                                                                                                                                         | COVID-19 Genomics UK (COG-UK) Consortium                                   | Institute of Microbiology, University of Birmingham: Claire McMurray, Joanne Stockton, Samuel Nicholls, Radoslaw Poplawski, Will Rowe, Josh Quick, Nicholas Loman. University of Birmingham Testing Laboratory: Celina M Whalley, Andrew Bosworth, Charlotte Poxon, Kasun Wanigasooriya, Oliver Pickles, Mike Kidd, Alex Richter, Andrew D Beggs PHE Heartlands Lab: Husam Osman, Andrew Bosworth. Queen Elizabeth Hospital: Anna Casey |
| EPI_ISL_1047583, EPI_ISL_1047584, EPI_ISL_1047585, EPI_ISL_1047586, EPI_ISL_1047587, EPI_ISL_1047588, EPI_ISL_1047589, EPI_ISL_1047590, EPI_ISL_1047591, EPI_ISL_1047592, EPI_ISL_1047593, EPI_ISL_1047594, EPI_ISL_1047595, EPI_ISL_1047596, EPI_ISL_1047597, EPI_ISL_1047598, EPI_ISL_1047599, EPI_ISL_1047600, EPI_ISL_1047601, EPI_ISL_1047602, EPI_ISL_1047603, EPI_ISL_1047604, EPI_ISL_1047605, EPI_ISL_1047606, EPI_ISL_1047607, EPI_ISL_1047608, EPI_ISL_1047609, EPI_ISL_1047610, EPI_ISL_1047611, EPI_ISL_1047612, EPI_ISL_1047613, EPI_ISL_1047614, EPI_ISL_1047615, EPI_ISL_1047616, EPI_ISL_1047617, EPI_ISL_1047618, EPI_ISL_1047619, EPI_ISL_1047620, EPI_ISL_1047621, EPI_ISL_1047622, EPI_ISL_1047623, EPI_ISL_1047624, EPI_ISL_1047625, EPI_ISL_1047626, EPI_ISL_1047627, EPI_ISL_1047628, EPI_ISL_1047629, EPI_ISL_1047630, EPI_ISL_1047631, EPI_ISL_1047632, EPI_ISL_1047633, EPI_ISL_1047634, EPI_ISL_1047635, EPI_ISL_1047636, EPI_ISL_1047637, EPI_ISL_1047638, EPI_ISL_1047639, EPI_ISL_1047640, EPI_ISL_1047641, EPI_ISL_1047642, EPI_ISL_1047643, EPI_ISL_1047644, EPI_ISL_1047645, EPI_ISL_1047646, EPI_ISL_1047647, EPI_ISL_1047648, EPI_ISL_1047649, EPI_ISL_1047650, EPI_ISL_1047651, EPI_ISL_1047652, EPI_ISL_1047653, EPI_ISL_1047654, EPI_ISL_1047655, EPI_ISL_1047656, EPI_ISL_1047657, EPI_ISL_1047658, EPI_ISL_1047659, EPI_ISL_1047660, EPI_ISL_1047661, EPI_ISL_1047662, EPI_ISL_1047663, EPI_ISL_1047664, EPI_ISL_1047665, EPI_ISL_1047666, EPI_ISL_1047667, EPI_ISL_1047668, EPI_ISL_1047669, EPI_ISL_1047670, EPI_ISL_1047671, EPI_ISL_1047672, EPI_ISL_1047673, EPI_ISL_1047674, EPI_ISL_1047675, EPI_ISL_1047676, EPI_ISL_1047677, EPI_ISL_1047678, EPI_ISL_1047679, EPI_ISL_1047680, EPI_ISL_1047681, EPI_ISL_1047682, EPI_ISL_1047683, EPI_ISL_1047684, EPI_ISL_1047685, EPI_ISL_1047686, EPI_ISL_1047687, EPI_ISL_1047688, EPI_ISL_1047689, EPI_ISL_1047690, EPI_ISL_1047691, EPI_ISL_1047692, EPI_ISL_1047693, EPI_ISL_1047694, EPI_ISL_1047695, EPI_ISL_1047696, EPI_ISL_1047697, EPI_ISL_1047698, EPI_ISL_1047699, EPI_ISL_1047700, EPI_ISL_1047701, EPI_ISL_1047702, EPI_ISL_1047703, EPI_ISL_1047704, EPI_ISL_1047705, EPI_ISL_1047706, EPI_ISL_1047707, EPI_ISL_1047708, EPI_ISL_1047709, EPI_ISL_1047710, EPI_ISL_1047711, EPI_ISL_1047712, EPI_ISL_1047713, EPI_ISL_1047714, EPI_ISL_1047715, EPI_ISL_1047716, EPI_ISL_1047717, EPI_ISL_1047718, EPI_ISL_1047719, EPI_ISL_1047720, EPI_ISL_1047721, EPI_ISL_1047722, EPI_ISL_1047723, EPI_ISL_1047724, EPI_ISL_1047725, EPI_ISL_1047726, EPI_ISL_1047727, EPI_ISL_1047728, EPI_ISL_1047729, EPI_ISL_1047730, EPI_ISL_1047731, EPI_ISL_1047732, EPI_ISL_1047733, EPI_ISL_1047734, EPI_ISL_1047735, EPI_ISL_1047736, EPI_ISL_1047737, EPI_ISL_1047738, EPI_ISL_1047739, EPI_ISL_1047740, EPI_ISL_1047741, EPI_ISL_1047742, EPI_ISL_1047743, EPI_ISL_1047744, EPI_ISL_1047745, EPI_ISL_1047746, EPI_ISL_1047747, EPI_ISL_1047748, EPI_ISL_1047749, EPI_ISL_1047750, EPI_ISL_1047751, EPI_ISL_1047752, EPI_ISL_1047753, EPI_ISL_1047754, EPI_ISL_1047755, EPI_ISL_1047756, EPI_ISL_1047757, EPI_ISL_1047758, EPI_ISL_1047759, EPI_ISL_1047760, EPI_ISL_1047761, EPI_ISL_1047762, EPI_ISL_1047763, EPI_ISL_1047764, EPI_ISL_1047765, EPI_ISL_1047766, EPI_ISL_1047767, EPI_ISL_1047768, EPI_ISL_1047769, EPI_ISL_1047770, EPI_ISL_1047771, EPI_ISL_1047772, EPI_ISL_1047773, EPI_ISL_1047774, EPI_ISL_1047775, EPI_ISL_1047776, EPI_ISL_1047777, EPI_ISL_1047778, EPI_ISL_1047779, EPI_ISL_1047780, EPI_ISL_1047781, EPI_ISL_1047782, EPI_ISL_1047783, EPI_ISL_1047784, EPI_ISL_1047785, EPI_ISL_1047786, EPI_ISL_1047787, EPI_ISL_1047788, EPI_ISL_1047789, EPI_ISL_1047790, EPI_ISL_1047791, EPI_ISL_1047792, EPI_ISL_1047793, EPI_ISL_1047794, EPI_ISL_1047795, EPI_ISL_1047796, EPI_ISL_1047797, EPI_ISL_1047798, EPI_ISL_1047799, EPI_ISL_1047800, EPI_ISL_1047801, EPI_ISL_1047802                                                                                                                                                                                                                                                                                                                                                                                                                                                                                                                                                                                                                                                                                                                                                                                                                                                                                                                                      |                                                                                                                                                                                  |                                                                            |                                                                                                                                                                                                                                                                                                                                                                                                                                         |
| see above                                                                                                                                                                                                                                                                                                                                                                                                                                                                                                                                                                                                                                                                                                                                                                                                                                                                                                                                                                                                                                                                                                                                                                                                                                                                                                                                                                                                                                                                                                                                                                                                                                                                                                                                                                                                                                                                                                                                                                                                                                                                                                                                                                                                                                                                                                                                                                                                                                                                                                                                                                                                                                                                                                                                                                                                                                                                                                                                                                                                                                                                                                                                                                                                                                                                                                                                                                                                                                                                                                                                                                                                                                                                                                                                                                                                                                                                                                                                                                                                                                                                                                                                                                                                                                                                                                                                                                                                                                                                                                                                                                                                                                                                                                                                                                                                                       | Virology Department, Sheffield Teaching Hospitals NHS Foundation Trust/Department of Infection, Immunity and Cardiovascular Disease, The Medical School, University of Sheffield | COVID-19 Genomics UK (COG-UK) Consortium                                   | Thushan de Silva, Matthew Parker, Nikki Smith, Adri Angyal, Rebecca Brown, Luke Green, Rachel Tucker, Paul Parsons, Danielle Groves, Katie Johnson, Laura Carrilero, Alex Keeley, Dave Partridge, Matthew Wyles, Benjamin Lindsey, Mehmet Yavuz, Mohammad Raza, Cariad Evans                                                                                                                                                            |
| EPI_ISL_1047822, EPI_ISL_1047825, EPI_ISL_1047826, EPI_ISL_1047827, EPI_ISL_1047828, EPI_ISL_1047829, EPI_ISL_1047830, EPI_ISL_1047831, EPI_ISL_1047832                                                                                                                                                                                                                                                                                                                                                                                                                                                                                                                                                                                                                                                                                                                                                                                                                                                                                                                                                                                                                                                                                                                                                                                                                                                                                                                                                                                                                                                                                                                                                                                                                                                                                                                                                                                                                                                                                                                                                                                                                                                                                                                                                                                                                                                                                                                                                                                                                                                                                                                                                                                                                                                                                                                                                                                                                                                                                                                                                                                                                                                                                                                                                                                                                                                                                                                                                                                                                                                                                                                                                                                                                                                                                                                                                                                                                                                                                                                                                                                                                                                                                                                                                                                                                                                                                                                                                                                                                                                                                                                                                                                                                                                                         | West of Scotland Specialist Virology Centre, NHSGGC / MRC-University of Glasgow Centre for Virus Research                                                                        | COVID-19 Genomics UK (COG-UK) Consortium                                   | Ana da Silva Filipe, Natasha Johnson, Kathy Smollett, Daniel Mair, Stephen Carmichael, Alice Broos, Lily Tong, Jenna Nichols, Kyriaki Nomikou; Sarah McDonald; Richard Orton, Joseph Hughes, Sreenu Vattipally, David L Robertson; Alasdair MacLean, Rory Gunson; Sharif Shaaban, Matthew Holden; Rachel Blacow, Guy Mollett, Kathy Li, James Shepherd, Antonia Ho, Emma Thomson                                                        |
| EPI_ISL_1047866, EPI_ISL_1047867, EPI_ISL_1047868, EPI_ISL_1047869,                                                                                                                                                                                                                                                                                                                                                                                                                                                                                                                                                                                                                                                                                                                                                                                                                                                                                                                                                                                                                                                                                                                                                                                                                                                                                                                                                                                                                                                                                                                                                                                                                                                                                                                                                                                                                                                                                                                                                                                                                                                                                                                                                                                                                                                                                                                                                                                                                                                                                                                                                                                                                                                                                                                                                                                                                                                                                                                                                                                                                                                                                                                                                                                                                                                                                                                                                                                                                                                                                                                                                                                                                                                                                                                                                                                                                                                                                                                                                                                                                                                                                                                                                                                                                                                                                                                                                                                                                                                                                                                                                                                                                                                                                                                                                             | Virology Department, Royal Infirmary of Edinburgh, NHS Lothian / School of Biological Sciences, University of                                                                    | COVID-19 Genomics UK (COG-UK) Consortium                                   | McHugh M, Dewar R, Cotton S, Rooke S, O'Toole Á, Scher E, Hill V, McCrone JT, Colquhoun R, Yu X, Jackson B, Rambaut A, Templeton K                                                                                                                                                                                                                                                                                                      |

|                                                                                                                                                                                                                                                                                                                                                                                                                                                                                                                                                                                                                                                                                                                                                                                                                                                                                                                                                                                                                                                                                                                                                                                                                                                                                                                                                                                                                |                                                                                                                                                                                                                     |                                          |                                                                                                                                                                                                                                                                                                                                                                                                                                                                                                                                                                                                                                                                                           |
|----------------------------------------------------------------------------------------------------------------------------------------------------------------------------------------------------------------------------------------------------------------------------------------------------------------------------------------------------------------------------------------------------------------------------------------------------------------------------------------------------------------------------------------------------------------------------------------------------------------------------------------------------------------------------------------------------------------------------------------------------------------------------------------------------------------------------------------------------------------------------------------------------------------------------------------------------------------------------------------------------------------------------------------------------------------------------------------------------------------------------------------------------------------------------------------------------------------------------------------------------------------------------------------------------------------------------------------------------------------------------------------------------------------|---------------------------------------------------------------------------------------------------------------------------------------------------------------------------------------------------------------------|------------------------------------------|-------------------------------------------------------------------------------------------------------------------------------------------------------------------------------------------------------------------------------------------------------------------------------------------------------------------------------------------------------------------------------------------------------------------------------------------------------------------------------------------------------------------------------------------------------------------------------------------------------------------------------------------------------------------------------------------|
| EPI_ISL_1047870, EPI_ISL_1047892                                                                                                                                                                                                                                                                                                                                                                                                                                                                                                                                                                                                                                                                                                                                                                                                                                                                                                                                                                                                                                                                                                                                                                                                                                                                                                                                                                               | Edinburgh                                                                                                                                                                                                           |                                          |                                                                                                                                                                                                                                                                                                                                                                                                                                                                                                                                                                                                                                                                                           |
| EPI_ISL_1047967, EPI_ISL_1047968, EPI_ISL_1047970, EPI_ISL_1047971, EPI_ISL_1047972, EPI_ISL_1047973, EPI_ISL_1048026, EPI_ISL_1048028, EPI_ISL_1048029, EPI_ISL_1048034                                                                                                                                                                                                                                                                                                                                                                                                                                                                                                                                                                                                                                                                                                                                                                                                                                                                                                                                                                                                                                                                                                                                                                                                                                       | Liverpool Clinical Laboratories                                                                                                                                                                                     | COVID-19 Genomics UK (COG-UK) Consortium | Sam Haldenby, Anita Lucaci, Steve Paterson, Julian Hiscox, Alistair Darby, M Almsaud, A Alrezaihi, Muhannad Alruwaili, Stuart D Armstrong, Jones Benjamin, Eleanor G Bentley, Anu Chawla, Jordan J Clark, Angela Cowell, Richard Eccles, Isabel Garcia-Dorival, Matthew Gemmell, Alessandro Gerada, PKF Gilmore, Richard Gregory, Ximeng Han, Catherine Hartley, Margaret Hughes, Miren Iturriza-Gomara, James Johnson, L Luu, Jenifer Manson, Charlotte Nelson, Elaine O'Toole, Cassie Olateju, Rebekah Penrice-Randal , Lucille Rainbow, N.P Randle, Trevor Ian Robinson, Parul Sharma, Ghada T Shawli, James P Stewart, Neil Swainston, Ecaterina Varnos, Joanne Watts, Mark Whitehead |
| EPI_ISL_1048070, EPI_ISL_1048074, EPI_ISL_1048079, EPI_ISL_1048101                                                                                                                                                                                                                                                                                                                                                                                                                                                                                                                                                                                                                                                                                                                                                                                                                                                                                                                                                                                                                                                                                                                                                                                                                                                                                                                                             | Barts Health NHS Trust                                                                                                                                                                                              | COVID-19 Genomics UK (COG-UK) Consortium | CUTINO-MOGUEL, Maria-Teresa; HARRINGTON, David; OWOYEMI, Dola; KULASEGARAN-SHYLINI, Raghavendran; BROAD, Claire; KELE, Beatrix                                                                                                                                                                                                                                                                                                                                                                                                                                                                                                                                                            |
| EPI_ISL_1050067                                                                                                                                                                                                                                                                                                                                                                                                                                                                                                                                                                                                                                                                                                                                                                                                                                                                                                                                                                                                                                                                                                                                                                                                                                                                                                                                                                                                | Virology Department, Sheffield Teaching Hospitals NHS Foundation Trust/Department of Infection, Immunity and Cardiovascular Disease, The Medical School, University of Sheffield                                    | COVID-19 Genomics UK (COG-UK) Consortium | Thushan de Silva, Matthew Parker, Nikki Smith, Adri Angyal, Rebecca Brown, Luke Green, Rachel Tucker, Paul Parsons, Danielle Groves, Katie Johnson, Laura Carrilero, Alex Keeley, Dave Partridge, Matthew Wyles, Benjamin Lindsey, Mehmet Yavuz, Mohammad Raza, Cariad Evans                                                                                                                                                                                                                                                                                                                                                                                                              |
| EPI_ISL_1050174, EPI_ISL_1050175                                                                                                                                                                                                                                                                                                                                                                                                                                                                                                                                                                                                                                                                                                                                                                                                                                                                                                                                                                                                                                                                                                                                                                                                                                                                                                                                                                               | West of Scotland Specialist Virology Centre, NHSGGC / MRC-University of Glasgow Centre for Virus Research                                                                                                           | COVID-19 Genomics UK (COG-UK) Consortium | Ana da Silva Filipe, Natasha Johnson, Kathy Smollett, Daniel Mair, Stephen Carmichael, Alice Broos, Lily Tong, Jenna Nichols, Kyriaki Nomikou; Sarah McDonald; Richard Orton, Joseph Hughes, Sreenu Vattipally, David L Robertson; Alasdair MacLean, Rory Gunson; Sharif Shaaban, Matthew Holden; Rachel Blacow, Guy Mollett, Kathy Li, James Shepherd, Antonia Ho, Emma Thomson                                                                                                                                                                                                                                                                                                          |
| EPI_ISL_1050296, EPI_ISL_1050297, EPI_ISL_1050298, EPI_ISL_1050299, EPI_ISL_1050304, EPI_ISL_1050305, EPI_ISL_1050306                                                                                                                                                                                                                                                                                                                                                                                                                                                                                                                                                                                                                                                                                                                                                                                                                                                                                                                                                                                                                                                                                                                                                                                                                                                                                          | University of Exeter                                                                                                                                                                                                | COVID-19 Genomics UK (COG-UK) Consortium | Ben Temperton,Aaron Jeffries,Michelle Michelsen,Joanna Warwick-Dugdale,Audrey Farbos,Robyn Manley,Stephen Michell,Jane Masoli                                                                                                                                                                                                                                                                                                                                                                                                                                                                                                                                                             |
| EPI_ISL_1050748, EPI_ISL_1050749, EPI_ISL_1050750, EPI_ISL_1050751, EPI_ISL_1050752, EPI_ISL_1050753, EPI_ISL_1050754, EPI_ISL_1050755, EPI_ISL_1050756, EPI_ISL_1050757, EPI_ISL_1050758, EPI_ISL_1050759, EPI_ISL_1050760, EPI_ISL_1050761, EPI_ISL_1050762, EPI_ISL_1050763, EPI_ISL_1050764, EPI_ISL_1050765, EPI_ISL_1050766, EPI_ISL_1050767, EPI_ISL_1050768, EPI_ISL_1050769, EPI_ISL_1050770, EPI_ISL_1050771, EPI_ISL_1050772, EPI_ISL_1050773, EPI_ISL_1050774, EPI_ISL_1050775, EPI_ISL_1050776, EPI_ISL_1050777, EPI_ISL_1050778, EPI_ISL_1050779, EPI_ISL_1050780, EPI_ISL_1050781, EPI_ISL_1050782, EPI_ISL_1050783, EPI_ISL_1050784, EPI_ISL_1050785, EPI_ISL_1050786, EPI_ISL_1050787, EPI_ISL_1050788, EPI_ISL_1050789, EPI_ISL_1050790, EPI_ISL_1050791, EPI_ISL_1050792, EPI_ISL_1050793, EPI_ISL_1050794, EPI_ISL_1050795, EPI_ISL_1050796, EPI_ISL_1050797, EPI_ISL_1050798, EPI_ISL_1050799, EPI_ISL_1050800, EPI_ISL_1050801, EPI_ISL_1050802, EPI_ISL_1050803, EPI_ISL_1050804, EPI_ISL_1050805, EPI_ISL_1050806, EPI_ISL_1050807, EPI_ISL_1050808, EPI_ISL_1050809, EPI_ISL_1050810, EPI_ISL_1050811, EPI_ISL_1050812, EPI_ISL_1050813, EPI_ISL_1050814, EPI_ISL_1050815, EPI_ISL_1050816, EPI_ISL_1050817, EPI_ISL_1050818, EPI_ISL_1050819, EPI_ISL_1050820, EPI_ISL_1050821, EPI_ISL_1050822, EPI_ISL_1050823, EPI_ISL_1050824, EPI_ISL_1050825, EPI_ISL_1050826, EPI_ISL_1050827 |                                                                                                                                                                                                                     |                                          |                                                                                                                                                                                                                                                                                                                                                                                                                                                                                                                                                                                                                                                                                           |
| see above                                                                                                                                                                                                                                                                                                                                                                                                                                                                                                                                                                                                                                                                                                                                                                                                                                                                                                                                                                                                                                                                                                                                                                                                                                                                                                                                                                                                      | Centre for Enzyme Innovation, University of Portsmouth / Translational Research Laboratory, Portsmouth Hospitals NHS Trust                                                                                          | COVID-19 Genomics UK (COG-UK) Consortium | Angela Beckett,Salman Goudarzi,Christopher Fearn,Kate Cook,Katie Loveson,Sharon Glaysher,Scott Elliott,Samuel Robson                                                                                                                                                                                                                                                                                                                                                                                                                                                                                                                                                                      |
| EPI_ISL_1050828, EPI_ISL_1050829, EPI_ISL_1050830, EPI_ISL_1050831, EPI_ISL_1050832, EPI_ISL_1050833, EPI_ISL_1050834                                                                                                                                                                                                                                                                                                                                                                                                                                                                                                                                                                                                                                                                                                                                                                                                                                                                                                                                                                                                                                                                                                                                                                                                                                                                                          | Virology Department, Sheffield Teaching Hospitals NHS Foundation Trust/Department of Infection, Immunity and Cardiovascular Disease, The Medical School, University of Sheffield                                    | COVID-19 Genomics UK (COG-UK) Consortium | Thushan de Silva, Matthew Parker, Nikki Smith, Adri Angyal, Rebecca Brown, Luke Green, Rachel Tucker, Paul Parsons, Danielle Groves, Katie Johnson, Laura Carrilero, Alex Keeley, Dave Partridge, Matthew Wyles, Benjamin Lindsey, Mehmet Yavuz, Mohammad Raza, Cariad Evans                                                                                                                                                                                                                                                                                                                                                                                                              |
| EPI_ISL_1050835, EPI_ISL_1050836, EPI_ISL_1050837, EPI_ISL_1050838, EPI_ISL_1050839                                                                                                                                                                                                                                                                                                                                                                                                                                                                                                                                                                                                                                                                                                                                                                                                                                                                                                                                                                                                                                                                                                                                                                                                                                                                                                                            | Centre for Enzyme Innovation, University of Portsmouth / Translational Research Laboratory, Portsmouth Hospitals NHS Trust                                                                                          | COVID-19 Genomics UK (COG-UK) Consortium | Angela Beckett,Salman Goudarzi,Christopher Fearn,Kate Cook,Katie Loveson,Sharon Glaysher,Scott Elliott,Samuel Robson                                                                                                                                                                                                                                                                                                                                                                                                                                                                                                                                                                      |
| EPI_ISL_1050840, EPI_ISL_1050841                                                                                                                                                                                                                                                                                                                                                                                                                                                                                                                                                                                                                                                                                                                                                                                                                                                                                                                                                                                                                                                                                                                                                                                                                                                                                                                                                                               | Virology Department, Sheffield Teaching Hospitals NHS Foundation Trust/Department of Infection, Immunity and Cardiovascular Disease, The Medical School, University of Sheffield                                    | COVID-19 Genomics UK (COG-UK) Consortium | Thushan de Silva, Matthew Parker, Nikki Smith, Adri Angyal, Rebecca Brown, Luke Green, Rachel Tucker, Paul Parsons, Danielle Groves, Katie Johnson, Laura Carrilero, Alex Keeley, Dave Partridge, Matthew Wyles, Benjamin Lindsey, Mehmet Yavuz, Mohammad Raza, Cariad Evans                                                                                                                                                                                                                                                                                                                                                                                                              |
| EPI_ISL_1050842, EPI_ISL_1050843, EPI_ISL_1050844, EPI_ISL_1050845, EPI_ISL_1050846, EPI_ISL_1050847, EPI_ISL_1050848, EPI_ISL_1050849, EPI_ISL_1050850, EPI_ISL_1050851, EPI_ISL_1050852, EPI_ISL_1050853, EPI_ISL_1050854, EPI_ISL_1050855, EPI_ISL_1050856, EPI_ISL_1050857, EPI_ISL_1050858, EPI_ISL_1050859, EPI_ISL_1050860, EPI_ISL_1050861                                                                                                                                                                                                                                                                                                                                                                                                                                                                                                                                                                                                                                                                                                                                                                                                                                                                                                                                                                                                                                                             |                                                                                                                                                                                                                     |                                          |                                                                                                                                                                                                                                                                                                                                                                                                                                                                                                                                                                                                                                                                                           |
| see above                                                                                                                                                                                                                                                                                                                                                                                                                                                                                                                                                                                                                                                                                                                                                                                                                                                                                                                                                                                                                                                                                                                                                                                                                                                                                                                                                                                                      | Centre for Enzyme Innovation, University of Portsmouth / Translational Research Laboratory, Portsmouth Hospitals NHS Trust                                                                                          | COVID-19 Genomics UK (COG-UK) Consortium | Angela Beckett,Salman Goudarzi,Christopher Fearn,Kate Cook,Katie Loveson,Sharon Glaysher,Scott Elliott,Samuel Robson                                                                                                                                                                                                                                                                                                                                                                                                                                                                                                                                                                      |
| EPI_ISL_1050863, EPI_ISL_1050864, EPI_ISL_1050865, EPI_ISL_1050866, EPI_ISL_1050867, EPI_ISL_1050868, EPI_ISL_1050870                                                                                                                                                                                                                                                                                                                                                                                                                                                                                                                                                                                                                                                                                                                                                                                                                                                                                                                                                                                                                                                                                                                                                                                                                                                                                          | Virology Department, Sheffield Teaching Hospitals NHS Foundation Trust/Department of Infection, Immunity and Cardiovascular Disease, The Medical School, University of Sheffield                                    | COVID-19 Genomics UK (COG-UK) Consortium | Thushan de Silva, Matthew Parker, Nikki Smith, Adri Angyal, Rebecca Brown, Luke Green, Rachel Tucker, Paul Parsons, Danielle Groves, Katie Johnson, Laura Carrilero, Alex Keeley, Dave Partridge, Matthew Wyles, Benjamin Lindsey, Mehmet Yavuz, Mohammad Raza, Cariad Evans                                                                                                                                                                                                                                                                                                                                                                                                              |
| EPI_ISL_1050871, EPI_ISL_1050872, EPI_ISL_1050873, EPI_ISL_1050874, EPI_ISL_1050875, EPI_ISL_1050876, EPI_ISL_1050877, EPI_ISL_1050878, EPI_ISL_1050879, EPI_ISL_1050880, EPI_ISL_1050881, EPI_ISL_1050882                                                                                                                                                                                                                                                                                                                                                                                                                                                                                                                                                                                                                                                                                                                                                                                                                                                                                                                                                                                                                                                                                                                                                                                                     |                                                                                                                                                                                                                     |                                          |                                                                                                                                                                                                                                                                                                                                                                                                                                                                                                                                                                                                                                                                                           |
| see above                                                                                                                                                                                                                                                                                                                                                                                                                                                                                                                                                                                                                                                                                                                                                                                                                                                                                                                                                                                                                                                                                                                                                                                                                                                                                                                                                                                                      | Centre for Enzyme Innovation, University of Portsmouth / Translational Research Laboratory, Portsmouth Hospitals NHS Trust                                                                                          | COVID-19 Genomics UK (COG-UK) Consortium | Angela Beckett,Salman Goudarzi,Christopher Fearn,Kate Cook,Katie Loveson,Sharon Glaysher,Scott Elliott,Samuel Robson                                                                                                                                                                                                                                                                                                                                                                                                                                                                                                                                                                      |
| EPI_ISL_1050883, EPI_ISL_1050884, EPI_ISL_1050885, EPI_ISL_1050886, EPI_ISL_1050887, EPI_ISL_1050888, EPI_ISL_1050889, EPI_ISL_1050890, EPI_ISL_1050891, EPI_ISL_1050892, EPI_ISL_1050893, EPI_ISL_1050894, EPI_ISL_1050895, EPI_ISL_1050896, EPI_ISL_1050897, EPI_ISL_1050898, EPI_ISL_1050899, EPI_ISL_1050900, EPI_ISL_1050901, EPI_ISL_1050902, EPI_ISL_1050903, EPI_ISL_1050904, EPI_ISL_1050905, EPI_ISL_1050906, EPI_ISL_1050907, EPI_ISL_1050908                                                                                                                                                                                                                                                                                                                                                                                                                                                                                                                                                                                                                                                                                                                                                                                                                                                                                                                                                       |                                                                                                                                                                                                                     |                                          |                                                                                                                                                                                                                                                                                                                                                                                                                                                                                                                                                                                                                                                                                           |
| see above                                                                                                                                                                                                                                                                                                                                                                                                                                                                                                                                                                                                                                                                                                                                                                                                                                                                                                                                                                                                                                                                                                                                                                                                                                                                                                                                                                                                      | Virology Department, Sheffield Teaching Hospitals NHS Foundation Trust/Department of Infection, Immunity and Cardiovascular Disease, The Medical School, University of Sheffield                                    | COVID-19 Genomics UK (COG-UK) Consortium | Thushan de Silva, Matthew Parker, Nikki Smith, Adri Angyal, Rebecca Brown, Luke Green, Rachel Tucker, Paul Parsons, Danielle Groves, Katie Johnson, Laura Carrilero, Alex Keeley, Dave Partridge, Matthew Wyles, Benjamin Lindsey, Mehmet Yavuz, Mohammad Raza, Cariad Evans                                                                                                                                                                                                                                                                                                                                                                                                              |
| EPI_ISL_1050909, EPI_ISL_1050910, EPI_ISL_1050911, EPI_ISL_1050912, EPI_ISL_1050913, EPI_ISL_1050914                                                                                                                                                                                                                                                                                                                                                                                                                                                                                                                                                                                                                                                                                                                                                                                                                                                                                                                                                                                                                                                                                                                                                                                                                                                                                                           | Centre for Enzyme Innovation, University of Portsmouth / Translational Research Laboratory, Portsmouth Hospitals NHS Trust                                                                                          | COVID-19 Genomics UK (COG-UK) Consortium | Angela Beckett,Salman Goudarzi,Christopher Fearn,Kate Cook,Katie Loveson,Sharon Glaysher,Scott Elliott,Samuel Robson                                                                                                                                                                                                                                                                                                                                                                                                                                                                                                                                                                      |
| EPI_ISL_1051261, EPI_ISL_1051262, EPI_ISL_1051263, EPI_ISL_1051264, EPI_ISL_1051265, EPI_ISL_1051266, EPI_ISL_1051267, EPI_ISL_1051268, EPI_ISL_1051269, EPI_ISL_1051270, EPI_ISL_1051271, EPI_ISL_1051272, EPI_ISL_1051273, EPI_ISL_1051274, EPI_ISL_1051275, EPI_ISL_1051276, EPI_ISL_1051277, EPI_ISL_1051278, EPI_ISL_1051279                                                                                                                                                                                                                                                                                                                                                                                                                                                                                                                                                                                                                                                                                                                                                                                                                                                                                                                                                                                                                                                                              |                                                                                                                                                                                                                     |                                          |                                                                                                                                                                                                                                                                                                                                                                                                                                                                                                                                                                                                                                                                                           |
| see above                                                                                                                                                                                                                                                                                                                                                                                                                                                                                                                                                                                                                                                                                                                                                                                                                                                                                                                                                                                                                                                                                                                                                                                                                                                                                                                                                                                                      | Northumbria University / South Tees Hospitals NHS Foundation Trust / North Cumbria Integrated Care NHS Foundation Trust / North Tees and Hartlepool NHS Foundation Trust / Newcastle Hospitals NHS Foundation Trust | COVID-19 Genomics UK (COG-UK) Consortium | Darren L Smith,Andrew Nelson,Matthew Bashton,Greg R Young,Joshua Loh,John Allan,Mohammad A Tariq,Giles S Holt,Gary Black,Wen C Yew,Lynn Dover,Paul Baker,Steve Liggett,Sarah Essex,Jane Greenaway,Debra Padgett,Clive Graham,Garren Scott,Edward Barton,Emma Swindells,Brendan Payne,Jennifer Collins,Yusri Taha,Gary Eltringham                                                                                                                                                                                                                                                                                                                                                          |
| EPI_ISL_1051639, EPI_ISL_1051640, EPI_ISL_1051642, EPI_ISL_1051643, EPI_ISL_1051646, EPI_ISL_1051649, EPI_ISL_1051651, EPI_ISL_1051655, EPI_ISL_1051694, EPI_ISL_1051695, EPI_ISL_1051696, EPI_ISL_1051698, EPI_ISL_1051700, EPI_ISL_1051701, EPI_ISL_1051702, EPI_ISL_1051703, EPI_ISL_1051704, EPI_ISL_1051705, EPI_ISL_1051706, EPI_ISL_1051707, EPI_ISL_1051708, EPI_ISL_1051709, EPI_ISL_1051711, EPI_ISL_1051713, EPI_ISL_1051714, EPI_ISL_1051723, EPI_ISL_1051724, EPI_ISL_1051729, EPI_ISL_1051734, EPI_ISL_1051735, EPI_ISL_1051736, EPI_ISL_1051738, EPI_ISL_1051741, EPI_ISL_1051742, EPI_ISL_1051744, EPI_ISL_1051745, EPI_ISL_1051747, EPI_ISL_1051755, EPI_ISL_1051756, EPI_ISL_1051775, EPI_ISL_1051880, EPI_ISL_1051900, EPI_ISL_1051901, EPI_ISL_1051912, EPI_ISL_1051913, EPI_ISL_1051916, EPI_ISL_1051917                                                                                                                                                                                                                                                                                                                                                                                                                                                                                                                                                                                  |                                                                                                                                                                                                                     |                                          |                                                                                                                                                                                                                                                                                                                                                                                                                                                                                                                                                                                                                                                                                           |
| see above                                                                                                                                                                                                                                                                                                                                                                                                                                                                                                                                                                                                                                                                                                                                                                                                                                                                                                                                                                                                                                                                                                                                                                                                                                                                                                                                                                                                      | Oxford Viromics, NDM, University of Oxford: Oxford University Hospitals; Basingstoke and North Hampshire Hospital                                                                                                   | COVID-19 Genomics UK (COG-UK) Consortium | Tanya Golubchik, David Bonsall, George Macintyre, Amy Trebes, Mariateresa de Cesare, Catrin Moore, Alex Mobbs, Anita Justice, Robert Shaw, Monique Andersson, Timothy Peto, Emma Wise, Nathan Moore, Jessica Lynch, Nick Cortes, Matilde Mori, Stephen Kidd, David Buck, John Todd, Christophe Fraser                                                                                                                                                                                                                                                                                                                                                                                     |
| EPI_ISL_1052139, EPI_ISL_1052140, EPI_ISL_1052141, EPI_ISL_1052148, EPI_ISL_1052149, EPI_ISL_1052151, EPI_ISL_1052152, EPI_ISL_1052153, EPI_ISL_1052154, EPI_ISL_1052155, EPI_ISL_1052156, EPI_ISL_1052157, EPI_ISL_1052172, EPI_ISL_1052173, EPI_ISL_1052174, EPI_ISL_1052175, EPI_ISL_1052176, EPI_ISL_1052177, EPI_ISL_1052178, EPI_ISL_1052179, EPI_ISL_1052180, EPI_ISL_1052181, EPI_ISL_1052182, EPI_ISL_1052183, EPI_ISL_1052184, EPI_ISL_1052186, EPI_ISL_1052187, EPI_ISL_1052188, EPI_ISL_1052189, EPI_ISL_1052190, EPI_ISL_1052191, EPI_ISL_1052192, EPI_ISL_1052193, EPI_ISL_1052195, EPI_ISL_1052196, EPI_ISL_1052197, EPI_ISL_1052198, EPI_ISL_1052199, EPI_ISL_1052200, EPI_ISL_1052201, EPI_ISL_1052202, EPI_ISL_1052205, EPI_ISL_1052208, EPI_ISL_1052210, EPI_ISL_1052223, EPI_ISL_1052241, EPI_ISL_1052244, EPI_ISL_1052248, EPI_ISL_1052249, EPI_ISL_1052254, EPI_ISL_1052255, EPI_ISL_1052256, EPI_ISL_1052257, EPI_ISL_1052258, EPI_ISL_1052268, EPI_ISL_1052271, EPI_ISL_1052286, EPI_ISL_1052330, EPI_ISL_1052472, EPI_ISL_1052484, EPI_ISL_1052485, EPI_ISL_1052486, EPI_ISL_1052487, EPI_ISL_1052495, EPI_ISL_1052529, EPI_ISL_1052531, EPI_ISL_1052532, EPI_ISL_1052533, EPI_ISL_1052534, EPI_ISL_1052535,                                                                                                                                                                          |                                                                                                                                                                                                                     |                                          |                                                                                                                                                                                                                                                                                                                                                                                                                                                                                                                                                                                                                                                                                           |

|                                                                                                                                                                                                                                                                                                                                                                                                                                                                                                                                                                                                                                                                                                                                                                                                                                                                                                                                                                                                                                                                                                                                                                                                                                                                                                                                                                                                                                                                                                                                                                                                                                                                                                                                                                                                                                                                                                                                                                                                                                                                                                                                                                                            |                                                                                                                                                                                                                     |                                                                           |                                                                                                                                                                                                                                                                                                                                                                                                                                                                                                                                                                                                                                                                                        |
|--------------------------------------------------------------------------------------------------------------------------------------------------------------------------------------------------------------------------------------------------------------------------------------------------------------------------------------------------------------------------------------------------------------------------------------------------------------------------------------------------------------------------------------------------------------------------------------------------------------------------------------------------------------------------------------------------------------------------------------------------------------------------------------------------------------------------------------------------------------------------------------------------------------------------------------------------------------------------------------------------------------------------------------------------------------------------------------------------------------------------------------------------------------------------------------------------------------------------------------------------------------------------------------------------------------------------------------------------------------------------------------------------------------------------------------------------------------------------------------------------------------------------------------------------------------------------------------------------------------------------------------------------------------------------------------------------------------------------------------------------------------------------------------------------------------------------------------------------------------------------------------------------------------------------------------------------------------------------------------------------------------------------------------------------------------------------------------------------------------------------------------------------------------------------------------------|---------------------------------------------------------------------------------------------------------------------------------------------------------------------------------------------------------------------|---------------------------------------------------------------------------|----------------------------------------------------------------------------------------------------------------------------------------------------------------------------------------------------------------------------------------------------------------------------------------------------------------------------------------------------------------------------------------------------------------------------------------------------------------------------------------------------------------------------------------------------------------------------------------------------------------------------------------------------------------------------------------|
| EPI_ISL_1052536, EPI_ISL_1052537, EPI_ISL_1052542, EPI_ISL_1052606, EPI_ISL_1052607, EPI_ISL_1052675, EPI_ISL_1053517, EPI_ISL_1053518, EPI_ISL_1053519, EPI_ISL_1053520, EPI_ISL_1053527, EPI_ISL_1053528, EPI_ISL_1053529, EPI_ISL_1053532, EPI_ISL_1053533, EPI_ISL_1053534, EPI_ISL_1053535, EPI_ISL_1053537, EPI_ISL_1053579, EPI_ISL_1053581, EPI_ISL_1053588, EPI_ISL_1053589, EPI_ISL_1053590, EPI_ISL_1053591, EPI_ISL_1053592, EPI_ISL_1053593, EPI_ISL_1053595, EPI_ISL_1053597                                                                                                                                                                                                                                                                                                                                                                                                                                                                                                                                                                                                                                                                                                                                                                                                                                                                                                                                                                                                                                                                                                                                                                                                                                                                                                                                                                                                                                                                                                                                                                                                                                                                                                 |                                                                                                                                                                                                                     |                                                                           |                                                                                                                                                                                                                                                                                                                                                                                                                                                                                                                                                                                                                                                                                        |
| see above                                                                                                                                                                                                                                                                                                                                                                                                                                                                                                                                                                                                                                                                                                                                                                                                                                                                                                                                                                                                                                                                                                                                                                                                                                                                                                                                                                                                                                                                                                                                                                                                                                                                                                                                                                                                                                                                                                                                                                                                                                                                                                                                                                                  | Originating lab: Wales Specialist Virology Centre Sequencing lab: Pathogen Genomics Unit                                                                                                                            | Public Health Wales Microbiology Cardiff Wales Specialist Virology Centre | Catherine Moore, Johnathan Evans, Laura Gifford, Malorie Perry, Simon Cottrell, Angela Marchbank, Alec Birchley, Alexander Adams, Amy Gaskin, Bree Gatica-Wilcox, Jason Coombes, Joel Southgate, Lauren Gilbert, Eue Graham, Nicole Pacchiarini, Sara Kumziene-Summerhayes, Sarah Taylor, Sophie Jones, Sara Rey, Matthew Bull, Joanne Watkins, Sally Corden, Tom Connor                                                                                                                                                                                                                                                                                                               |
| EPI_ISL_1053821, EPI_ISL_1053858, EPI_ISL_1053859, EPI_ISL_1053893, EPI_ISL_1053939, EPI_ISL_1053953, EPI_ISL_1053954, EPI_ISL_1053955, EPI_ISL_1053956, EPI_ISL_1053957, EPI_ISL_1053958, EPI_ISL_1053959, EPI_ISL_1053960                                                                                                                                                                                                                                                                                                                                                                                                                                                                                                                                                                                                                                                                                                                                                                                                                                                                                                                                                                                                                                                                                                                                                                                                                                                                                                                                                                                                                                                                                                                                                                                                                                                                                                                                                                                                                                                                                                                                                                |                                                                                                                                                                                                                     |                                                                           |                                                                                                                                                                                                                                                                                                                                                                                                                                                                                                                                                                                                                                                                                        |
| see above                                                                                                                                                                                                                                                                                                                                                                                                                                                                                                                                                                                                                                                                                                                                                                                                                                                                                                                                                                                                                                                                                                                                                                                                                                                                                                                                                                                                                                                                                                                                                                                                                                                                                                                                                                                                                                                                                                                                                                                                                                                                                                                                                                                  | Centre for Enzyme Innovation, University of Portsmouth / Translational Research Laboratory, Portsmouth Hospitals NHS Trust                                                                                          | COVID-19 Genomics UK (COG-UK) Consortium                                  | Angela Beckett,Salman Goudarzi,Christopher Fearn,Kate Cook,Katie Loveson,Sharon Glaysher,Scott Elliott,Samuel Robson                                                                                                                                                                                                                                                                                                                                                                                                                                                                                                                                                                   |
| EPI_ISL_1053977, EPI_ISL_1053978, EPI_ISL_1053979, EPI_ISL_1053980, EPI_ISL_1053982, EPI_ISL_1053983, EPI_ISL_1053984, EPI_ISL_1053985, EPI_ISL_1053986, EPI_ISL_1053987, EPI_ISL_1053989, EPI_ISL_1053990, EPI_ISL_1053991, EPI_ISL_1053992, EPI_ISL_1053993, EPI_ISL_1053994, EPI_ISL_1053995, EPI_ISL_1053996, EPI_ISL_1053998, EPI_ISL_1053999, EPI_ISL_1054001, EPI_ISL_1054002, EPI_ISL_1054004, EPI_ISL_1054005, EPI_ISL_1054006, EPI_ISL_1054007, EPI_ISL_1054009, EPI_ISL_1054010, EPI_ISL_1054012, EPI_ISL_1054013, EPI_ISL_1054014, EPI_ISL_1054015, EPI_ISL_1054016, EPI_ISL_1054018, EPI_ISL_1054019, EPI_ISL_1054020, EPI_ISL_1054022, EPI_ISL_1054023, EPI_ISL_1054024, EPI_ISL_1054025, EPI_ISL_1054026, EPI_ISL_1054027, EPI_ISL_1054028, EPI_ISL_1054029, EPI_ISL_1054030, EPI_ISL_1054031, EPI_ISL_1054032, EPI_ISL_1054033, EPI_ISL_1054034, EPI_ISL_1054035, EPI_ISL_1054036, EPI_ISL_1054037, EPI_ISL_1054040, EPI_ISL_1054042, EPI_ISL_1054043, EPI_ISL_1054044, EPI_ISL_1054045, EPI_ISL_1054046, EPI_ISL_1054047, EPI_ISL_1054048, EPI_ISL_1054049, EPI_ISL_1054050, EPI_ISL_1054053, EPI_ISL_1054054, EPI_ISL_1054055, EPI_ISL_1054056, EPI_ISL_1054057, EPI_ISL_1054058, EPI_ISL_1054059, EPI_ISL_1054060, EPI_ISL_1054065, EPI_ISL_1054066, EPI_ISL_1054067, EPI_ISL_1054069, EPI_ISL_1054070, EPI_ISL_1054071, EPI_ISL_1054072, EPI_ISL_1054073, EPI_ISL_1054074, EPI_ISL_1054075, EPI_ISL_1054076, EPI_ISL_1054077, EPI_ISL_1054078, EPI_ISL_1054079, EPI_ISL_1054081, EPI_ISL_1054082, EPI_ISL_1054083, EPI_ISL_1054084, EPI_ISL_1054085, EPI_ISL_1054086, EPI_ISL_1054087, EPI_ISL_1054088, EPI_ISL_1054089, EPI_ISL_1054090, EPI_ISL_1054091, EPI_ISL_1054092, EPI_ISL_1054093, EPI_ISL_1054094, EPI_ISL_1054096, EPI_ISL_1054097, EPI_ISL_1054098, EPI_ISL_1054099, EPI_ISL_1054100, EPI_ISL_1054101, EPI_ISL_1054102, EPI_ISL_1054103, EPI_ISL_1054104, EPI_ISL_1054105, EPI_ISL_1054106, EPI_ISL_1054107, EPI_ISL_1054110, EPI_ISL_1054111, EPI_ISL_1054112, EPI_ISL_1054114, EPI_ISL_1054115, EPI_ISL_1054116, EPI_ISL_1054117, EPI_ISL_1054118, EPI_ISL_1054120, EPI_ISL_1054122, EPI_ISL_1054125, EPI_ISL_1054126, EPI_ISL_1054128, EPI_ISL_1054130 |                                                                                                                                                                                                                     |                                                                           |                                                                                                                                                                                                                                                                                                                                                                                                                                                                                                                                                                                                                                                                                        |
| see above                                                                                                                                                                                                                                                                                                                                                                                                                                                                                                                                                                                                                                                                                                                                                                                                                                                                                                                                                                                                                                                                                                                                                                                                                                                                                                                                                                                                                                                                                                                                                                                                                                                                                                                                                                                                                                                                                                                                                                                                                                                                                                                                                                                  | University of Exeter                                                                                                                                                                                                | COVID-19 Genomics UK (COG-UK) Consortium                                  | Ben Temperton,Aaron Jeffries,Michelle Michelsen,Joanna Warwick-Dugdale,Audrey Farbos,Robyn Manley,Stephen Michell,Jane Masoli                                                                                                                                                                                                                                                                                                                                                                                                                                                                                                                                                          |
| EPI_ISL_1054131, EPI_ISL_1054132, EPI_ISL_1054133, EPI_ISL_1054134, EPI_ISL_1054135, EPI_ISL_1054136, EPI_ISL_1054137, EPI_ISL_1054138, EPI_ISL_1054139, EPI_ISL_1054140, EPI_ISL_1054142, EPI_ISL_1054143, EPI_ISL_1054144, EPI_ISL_1054145, EPI_ISL_1054146, EPI_ISL_1054147, EPI_ISL_1054148, EPI_ISL_1054149, EPI_ISL_1054150, EPI_ISL_1054151, EPI_ISL_1054152, EPI_ISL_1054153, EPI_ISL_1054154, EPI_ISL_1054155, EPI_ISL_1054156, EPI_ISL_1054157, EPI_ISL_1054158, EPI_ISL_1054159, EPI_ISL_1054160, EPI_ISL_1054161, EPI_ISL_1054162, EPI_ISL_1054163, EPI_ISL_1054164, EPI_ISL_1054165, EPI_ISL_1054166, EPI_ISL_1054167, EPI_ISL_1054168, EPI_ISL_1054169, EPI_ISL_1054170, EPI_ISL_1054171, EPI_ISL_1054172, EPI_ISL_1054173, EPI_ISL_1054174, EPI_ISL_1054175, EPI_ISL_1054176, EPI_ISL_1054177, EPI_ISL_1054178, EPI_ISL_1054179, EPI_ISL_1054180, EPI_ISL_1054181, EPI_ISL_1054182, EPI_ISL_1054183, EPI_ISL_1054184, EPI_ISL_1054185, EPI_ISL_1054186, EPI_ISL_1054187, EPI_ISL_1054188, EPI_ISL_1054189, EPI_ISL_1054190, EPI_ISL_1054191, EPI_ISL_1054192, EPI_ISL_1054193, EPI_ISL_1054194, EPI_ISL_1054195, EPI_ISL_1054196, EPI_ISL_1054197, EPI_ISL_1054198, EPI_ISL_1054199, EPI_ISL_1054200, EPI_ISL_1054201, EPI_ISL_1054202, EPI_ISL_1054203, EPI_ISL_1054204, EPI_ISL_1054205, EPI_ISL_1054206, EPI_ISL_1054207, EPI_ISL_1054208, EPI_ISL_1054209, EPI_ISL_1054210, EPI_ISL_1054211, EPI_ISL_1054212, EPI_ISL_1054213, EPI_ISL_1054214, EPI_ISL_1054215, EPI_ISL_1054216, EPI_ISL_1054217, EPI_ISL_1054218, EPI_ISL_1054220, EPI_ISL_1054221, EPI_ISL_1054222, EPI_ISL_1054223, EPI_ISL_1054225, EPI_ISL_1054226, EPI_ISL_1054227, EPI_ISL_1054228, EPI_ISL_1054229, EPI_ISL_1054230, EPI_ISL_1054231, EPI_ISL_1054232, EPI_ISL_1054233, EPI_ISL_1054234, EPI_ISL_1054235, EPI_ISL_1054236, EPI_ISL_1054237, EPI_ISL_1054238, EPI_ISL_1054239, EPI_ISL_1054240, EPI_ISL_1054243, EPI_ISL_1054244, EPI_ISL_1054245, EPI_ISL_1054246, EPI_ISL_1054247, EPI_ISL_1054248, EPI_ISL_1054249, EPI_ISL_1054251, EPI_ISL_1054252, EPI_ISL_1054253, EPI_ISL_1054255, EPI_ISL_1054256, EPI_ISL_1054257                                                                     |                                                                                                                                                                                                                     |                                                                           |                                                                                                                                                                                                                                                                                                                                                                                                                                                                                                                                                                                                                                                                                        |
| see above                                                                                                                                                                                                                                                                                                                                                                                                                                                                                                                                                                                                                                                                                                                                                                                                                                                                                                                                                                                                                                                                                                                                                                                                                                                                                                                                                                                                                                                                                                                                                                                                                                                                                                                                                                                                                                                                                                                                                                                                                                                                                                                                                                                  | Northumbria University / South Tees Hospitals NHS Foundation Trust / North Cumbria Integrated Care NHS Foundation Trust / North Tees and Hartlepool NHS Foundation Trust / Newcastle Hospitals NHS Foundation Trust | COVID-19 Genomics UK (COG-UK) Consortium                                  | Darren L Smith,Andrew Nelson,Matthew Bashton,Greg R Young,Joshua Loh,John Allan,Mohammad A Tariq,Giles S Holt,Gary Black,Wen C Yew,Lynn Dover,Paul Baker,Steve Liggett,Sarah Essex,Jane Greenaway,Debra Padgett,Clive Graham,Garren Scott,Edward Barton,Emma Swindells,Brendan Payne,Jennifer Collins,Yusri Taha,Gary Eltringham                                                                                                                                                                                                                                                                                                                                                       |
| EPI_ISL_1054372, EPI_ISL_1054373, EPI_ISL_1054374, EPI_ISL_1054375, EPI_ISL_1054376, EPI_ISL_1054377, EPI_ISL_1054378, EPI_ISL_1054379, EPI_ISL_1054380, EPI_ISL_1054381, EPI_ISL_1054382, EPI_ISL_1054383, EPI_ISL_1054384, EPI_ISL_1054385, EPI_ISL_1054386, EPI_ISL_1054387, EPI_ISL_1054388, EPI_ISL_1054389, EPI_ISL_1054390, EPI_ISL_1054404, EPI_ISL_1054405, EPI_ISL_1054406, EPI_ISL_1054407, EPI_ISL_1054408, EPI_ISL_1054409, EPI_ISL_1054410, EPI_ISL_1054417, EPI_ISL_1054418, EPI_ISL_1054419, EPI_ISL_1054429, EPI_ISL_1054430, EPI_ISL_1054431, EPI_ISL_1054438, EPI_ISL_1054439, EPI_ISL_1054440, EPI_ISL_1054441, EPI_ISL_1054442, EPI_ISL_1054443, EPI_ISL_1054447, EPI_ISL_1054448, EPI_ISL_1054449, EPI_ISL_1054450, EPI_ISL_1054454, EPI_ISL_1054457, EPI_ISL_1054458, EPI_ISL_1054461                                                                                                                                                                                                                                                                                                                                                                                                                                                                                                                                                                                                                                                                                                                                                                                                                                                                                                                                                                                                                                                                                                                                                                                                                                                                                                                                                                               |                                                                                                                                                                                                                     |                                                                           |                                                                                                                                                                                                                                                                                                                                                                                                                                                                                                                                                                                                                                                                                        |
| see above                                                                                                                                                                                                                                                                                                                                                                                                                                                                                                                                                                                                                                                                                                                                                                                                                                                                                                                                                                                                                                                                                                                                                                                                                                                                                                                                                                                                                                                                                                                                                                                                                                                                                                                                                                                                                                                                                                                                                                                                                                                                                                                                                                                  | Queens Medical Centre, Clinical Microbiology Department / DeepSeq Nottingham                                                                                                                                        | COVID-19 Genomics UK (COG-UK) Consortium                                  | Gemma Clark, Wendy Smith, Manjinder Khakh, Vicki M Fleming, Michelle M Lister, Hannah Howson-Wells, Jonathan Ball, Patrick McClure, Joseph Chappell, Theocharis Tsoleridis, Nadine Holmes, Matthew Carlisle, Christopher Moore, Fei Sang, Johnny Debebe, Victoria Wright, Matthew Loose                                                                                                                                                                                                                                                                                                                                                                                                |
| EPI_ISL_1054507, EPI_ISL_1054508, EPI_ISL_1054519, EPI_ISL_1054520, EPI_ISL_1054522, EPI_ISL_1054523, EPI_ISL_1054524, EPI_ISL_1054525, EPI_ISL_1054526, EPI_ISL_1054527                                                                                                                                                                                                                                                                                                                                                                                                                                                                                                                                                                                                                                                                                                                                                                                                                                                                                                                                                                                                                                                                                                                                                                                                                                                                                                                                                                                                                                                                                                                                                                                                                                                                                                                                                                                                                                                                                                                                                                                                                   | University of Exeter                                                                                                                                                                                                | COVID-19 Genomics UK (COG-UK) Consortium                                  | Ben Temperton,Aaron Jeffries,Michelle Michelsen,Joanna Warwick-Dugdale,Audrey Farbos,Robyn Manley,Stephen Michell,Jane Masoli                                                                                                                                                                                                                                                                                                                                                                                                                                                                                                                                                          |
| EPI_ISL_1054825, EPI_ISL_1054832                                                                                                                                                                                                                                                                                                                                                                                                                                                                                                                                                                                                                                                                                                                                                                                                                                                                                                                                                                                                                                                                                                                                                                                                                                                                                                                                                                                                                                                                                                                                                                                                                                                                                                                                                                                                                                                                                                                                                                                                                                                                                                                                                           | Bioinformatics and Biostatistics Lab, Advanced Sequencing Facility                                                                                                                                                  | COVID-19 Genomics UK (COG-UK) Consortium                                  | Aengus Stewart,Jerome Nicod,Chelsea Sawyer,Laura Cubitt,Harshil Patel,Margaret Crawford                                                                                                                                                                                                                                                                                                                                                                                                                                                                                                                                                                                                |
| EPI_ISL_1103792, EPI_ISL_1103797                                                                                                                                                                                                                                                                                                                                                                                                                                                                                                                                                                                                                                                                                                                                                                                                                                                                                                                                                                                                                                                                                                                                                                                                                                                                                                                                                                                                                                                                                                                                                                                                                                                                                                                                                                                                                                                                                                                                                                                                                                                                                                                                                           | University of Exeter                                                                                                                                                                                                | COVID-19 Genomics UK (COG-UK) Consortium                                  | Ben Temperton,Aaron Jeffries,Michelle Michelsen,Joanna Warwick-Dugdale,Audrey Farbos,Robyn Manley,Stephen Michell,Jane Masoli                                                                                                                                                                                                                                                                                                                                                                                                                                                                                                                                                          |
| EPI_ISL_1103953, EPI_ISL_1103954, EPI_ISL_1103955, EPI_ISL_1103956, EPI_ISL_1103957, EPI_ISL_1103958, EPI_ISL_1103959, EPI_ISL_1103960, EPI_ISL_1103961, EPI_ISL_1103962, EPI_ISL_1103963, EPI_ISL_1103964, EPI_ISL_1103967, EPI_ISL_1103968, EPI_ISL_1104007, EPI_ISL_1104008, EPI_ISL_1104009, EPI_ISL_1104010, EPI_ISL_1104011, EPI_ISL_1104012, EPI_ISL_1104013                                                                                                                                                                                                                                                                                                                                                                                                                                                                                                                                                                                                                                                                                                                                                                                                                                                                                                                                                                                                                                                                                                                                                                                                                                                                                                                                                                                                                                                                                                                                                                                                                                                                                                                                                                                                                        |                                                                                                                                                                                                                     |                                                                           |                                                                                                                                                                                                                                                                                                                                                                                                                                                                                                                                                                                                                                                                                        |
| see above                                                                                                                                                                                                                                                                                                                                                                                                                                                                                                                                                                                                                                                                                                                                                                                                                                                                                                                                                                                                                                                                                                                                                                                                                                                                                                                                                                                                                                                                                                                                                                                                                                                                                                                                                                                                                                                                                                                                                                                                                                                                                                                                                                                  | Northumbria University / South Tees Hospitals NHS Foundation Trust / North Cumbria Integrated Care NHS Foundation Trust / North Tees and Hartlepool NHS Foundation Trust / Newcastle Hospitals NHS Foundation Trust | COVID-19 Genomics UK (COG-UK) Consortium                                  | Darren L Smith,Andrew Nelson,Matthew Bashton,Greg R Young,Joshua Loh,John Allan,Mohammad A Tariq,Giles S Holt,Gary Black,Wen C Yew,Lynn Dover,Paul Baker,Steve Liggett,Sarah Essex,Jane Greenaway,Debra Padgett,Clive Graham,Garren Scott,Edward Barton,Emma Swindells,Brendan Payne,Jennifer Collins,Yusri Taha,Gary Eltringham                                                                                                                                                                                                                                                                                                                                                       |
| EPI_ISL_1104029, EPI_ISL_1104041, EPI_ISL_1104042, EPI_ISL_1104043, EPI_ISL_1104044, EPI_ISL_1104045, EPI_ISL_1104046, EPI_ISL_1104048, EPI_ISL_1104051, EPI_ISL_1104052, EPI_ISL_1104053, EPI_ISL_1104054, EPI_ISL_1104055, EPI_ISL_1104056, EPI_ISL_1104057, EPI_ISL_1104058, EPI_ISL_1104059, EPI_ISL_1104060, EPI_ISL_1104062, EPI_ISL_1104063, EPI_ISL_1104065, EPI_ISL_1104066, EPI_ISL_1104067, EPI_ISL_1104068, EPI_ISL_1104069, EPI_ISL_1104070                                                                                                                                                                                                                                                                                                                                                                                                                                                                                                                                                                                                                                                                                                                                                                                                                                                                                                                                                                                                                                                                                                                                                                                                                                                                                                                                                                                                                                                                                                                                                                                                                                                                                                                                   |                                                                                                                                                                                                                     |                                                                           |                                                                                                                                                                                                                                                                                                                                                                                                                                                                                                                                                                                                                                                                                        |
| see above                                                                                                                                                                                                                                                                                                                                                                                                                                                                                                                                                                                                                                                                                                                                                                                                                                                                                                                                                                                                                                                                                                                                                                                                                                                                                                                                                                                                                                                                                                                                                                                                                                                                                                                                                                                                                                                                                                                                                                                                                                                                                                                                                                                  | Virology Department, Sheffield Teaching Hospitals NHS Foundation Trust/Department of Infection, Immunity and Cardiovascular Disease, The Medical School, University of Sheffield                                    | COVID-19 Genomics UK (COG-UK) Consortium                                  | Thushan de Silva, Matthew Parker, Nikki Smith, Adri Agyal, Rebecca Brown, Luke Green, Rachel Tucker, Paul Parsons, Danielle Groves, Katie Johnson, Laura Carrilero, Alex Keeley, Dave Partridge, Matthew Wyles, Benjamin Lindsey, Mehmet Yavuz, Mohammad Raza, Cariad Evans                                                                                                                                                                                                                                                                                                                                                                                                            |
| EPI_ISL_1104223                                                                                                                                                                                                                                                                                                                                                                                                                                                                                                                                                                                                                                                                                                                                                                                                                                                                                                                                                                                                                                                                                                                                                                                                                                                                                                                                                                                                                                                                                                                                                                                                                                                                                                                                                                                                                                                                                                                                                                                                                                                                                                                                                                            | Virology Department, Royal Infirmary of Edinburgh, NHS Lothian / School of Biological Sciences, University of Edinburgh                                                                                             | COVID-19 Genomics UK (COG-UK) Consortium                                  | McHugh M, Dewar R, Cotton S, Rooke S, O'Toole Á, Scher E, Hill V, McCrone JT, Colquhoun R, Yu X, Jackson B, Rambaut A, Templeton K                                                                                                                                                                                                                                                                                                                                                                                                                                                                                                                                                     |
| EPI_ISL_1104502, EPI_ISL_1104503, EPI_ISL_1104506, EPI_ISL_1104507, EPI_ISL_1104508, EPI_ISL_1104509, EPI_ISL_1104510, EPI_ISL_1104568                                                                                                                                                                                                                                                                                                                                                                                                                                                                                                                                                                                                                                                                                                                                                                                                                                                                                                                                                                                                                                                                                                                                                                                                                                                                                                                                                                                                                                                                                                                                                                                                                                                                                                                                                                                                                                                                                                                                                                                                                                                     | Liverpool Clinical Laboratories                                                                                                                                                                                     | COVID-19 Genomics UK (COG-UK) Consortium                                  | Sam Haldenby, Anita Lucaci, Steve Paterson, Julian Hiscox, Alistair Darby, M Almsaud, A Alrezaihi, Muhanad Alruwaili, Stuart D Armstrong, Jones Benjamin, Eleanor G Bentley, Anu Chawla, Jordan J Clark, Angela Cowell, Richard Eccles, Isabel Garcia-Dorival, Matthew Gemmell, Alessandro Gerada, PKF Gilmore, Richard Gregory, Ximeng Han, Catherine Hartley, Margaret Hughes, Miren Iturria-Gomara, James Johnson, L Luu, Jenifer Manson, Charlotte Nelson, Elaine O'Toole, Cassie Olateju, Rebekah Penrice-Randal , Lucille Rainbow, N.P Randle, Trevor Ian Robinson, Parul Sharma, Ghada T Shawli, James P Stewart, Neil Swainston, Ecaterina Vamos, Joanne Watts, Mark Whitehead |
| EPI_ISL_1104899, EPI_ISL_1104933, EPI_ISL_1104939, EPI_ISL_1104943, EPI_ISL_1104946, EPI_ISL_1104950, EPI_ISL_1104952, EPI_ISL_1104953, EPI_ISL_1104956, EPI_ISL_1104957, EPI_ISL_1104959, EPI_ISL_1104960, EPI_ISL_1104962, EPI_ISL_1104965, EPI_ISL_1104966, EPI_ISL_1104970, EPI_ISL_1104985, EPI_ISL_1105151, EPI_ISL_1105156, EPI_ISL_1105173, EPI_ISL_1105186                                                                                                                                                                                                                                                                                                                                                                                                                                                                                                                                                                                                                                                                                                                                                                                                                                                                                                                                                                                                                                                                                                                                                                                                                                                                                                                                                                                                                                                                                                                                                                                                                                                                                                                                                                                                                        |                                                                                                                                                                                                                     |                                                                           |                                                                                                                                                                                                                                                                                                                                                                                                                                                                                                                                                                                                                                                                                        |
| see above                                                                                                                                                                                                                                                                                                                                                                                                                                                                                                                                                                                                                                                                                                                                                                                                                                                                                                                                                                                                                                                                                                                                                                                                                                                                                                                                                                                                                                                                                                                                                                                                                                                                                                                                                                                                                                                                                                                                                                                                                                                                                                                                                                                  | University College London Hospital                                                                                                                                                                                  | COVID-19 Genomics UK (COG-UK) Consortium                                  | Judith Heaney, Matthew Byott, Catherine Houlihan, Dan Frampton, Stuart Kirk, Moira Spyer and Eleni Nastouli                                                                                                                                                                                                                                                                                                                                                                                                                                                                                                                                                                            |
| EPI_ISL_1105447, EPI_ISL_1105448, EPI_ISL_1105449                                                                                                                                                                                                                                                                                                                                                                                                                                                                                                                                                                                                                                                                                                                                                                                                                                                                                                                                                                                                                                                                                                                                                                                                                                                                                                                                                                                                                                                                                                                                                                                                                                                                                                                                                                                                                                                                                                                                                                                                                                                                                                                                          | University College London, Great Ormond Street Hospital for Children NHS Foundation Trust, Imperial College Healthcare NHS Trust                                                                                    | COVID-19 Genomics UK (COG-UK) Consortium                                  | Sergi Castellano, Rachel Williams, Mark Kristiansen, Paola Resende Silva, Sunando Roy, Tony Brooks, Helena Tutill, Paola Niola, Patricia Dyal, Charlotte Williams, Leysa Forrest, Yasmin Panchbhaya, Jacqueline Findlay, Samuel Weeks, Julianne Brown, Kathryn Harris, Paul Randell, James Price, Alison Holmes, Judith Breuer                                                                                                                                                                                                                                                                                                                                                         |
| EPI_ISL_1105473, EPI_ISL_1105474, EPI_ISL_1105475, EPI_ISL_1105476, EPI_ISL_1105477, EPI_ISL_1105478, EPI_ISL_1105479, EPI_ISL_1105480, EPI_ISL_1105481, EPI_ISL_1105482, EPI_ISL_1105483, EPI_ISL_1105484, EPI_ISL_1105485, EPI_ISL_1105486, EPI_ISL_1105487, EPI_ISL_1105488, EPI_ISL_1105489, EPI_ISL_1105490, EPI_ISL_1105491, EPI_ISL_1105492, EPI_ISL_1105493                                                                                                                                                                                                                                                                                                                                                                                                                                                                                                                                                                                                                                                                                                                                                                                                                                                                                                                                                                                                                                                                                                                                                                                                                                                                                                                                                                                                                                                                                                                                                                                                                                                                                                                                                                                                                        |                                                                                                                                                                                                                     |                                                                           |                                                                                                                                                                                                                                                                                                                                                                                                                                                                                                                                                                                                                                                                                        |
| see above                                                                                                                                                                                                                                                                                                                                                                                                                                                                                                                                                                                                                                                                                                                                                                                                                                                                                                                                                                                                                                                                                                                                                                                                                                                                                                                                                                                                                                                                                                                                                                                                                                                                                                                                                                                                                                                                                                                                                                                                                                                                                                                                                                                  | Northumbria University / South Tees Hospitals NHS Foundation Trust / North Cumbria Integrated Care NHS Foundation Trust / North Tees and Hartlepool NHS Foundation Trust / Newcastle Hospitals NHS Foundation Trust | COVID-19 Genomics UK (COG-UK) Consortium                                  | Darren L Smith,Andrew Nelson,Matthew Bashton,Greg R Young,Joshua Loh,John Allan,Mohammad A Tariq,Giles S Holt,Gary Black,Wen C Yew,Lynn Dover,Paul Baker,Steve Liggett,Sarah Essex,Jane Greenaway,Debra Padgett,Clive Graham,Garren Scott,Edward Barton,Emma Swindells,Brendan Payne,Jennifer Collins,Yusri Taha,Gary Eltringham                                                                                                                                                                                                                                                                                                                                                       |

|                                                                                                                                                                                                                                                                                                                                   |                                                                                                                                                                                  |                                                                                                                                                                                                                     |                                                                                                                                                                                                                                                                                                                                                                                                                                                                                                                                                                                                                                                                                                             |                                                                                                                                                                                                                                                                                                                                  |
|-----------------------------------------------------------------------------------------------------------------------------------------------------------------------------------------------------------------------------------------------------------------------------------------------------------------------------------|----------------------------------------------------------------------------------------------------------------------------------------------------------------------------------|---------------------------------------------------------------------------------------------------------------------------------------------------------------------------------------------------------------------|-------------------------------------------------------------------------------------------------------------------------------------------------------------------------------------------------------------------------------------------------------------------------------------------------------------------------------------------------------------------------------------------------------------------------------------------------------------------------------------------------------------------------------------------------------------------------------------------------------------------------------------------------------------------------------------------------------------|----------------------------------------------------------------------------------------------------------------------------------------------------------------------------------------------------------------------------------------------------------------------------------------------------------------------------------|
| EPI_ISL_1105494, EPI_ISL_1105495                                                                                                                                                                                                                                                                                                  | Centre for Enzyme Innovation, University of Portsmouth / Translational Research Laboratory, Portsmouth Hospitals NHS Trust                                                       | COVID-19 Genomics UK (COG-UK) Consortium                                                                                                                                                                            | Angela Beckett,Salman Goudarzi,Christopher Fearn,Kate Cook,Katie Loveson,Sharon Glaysher,Scott Elliott,Samuel Robson                                                                                                                                                                                                                                                                                                                                                                                                                                                                                                                                                                                        |                                                                                                                                                                                                                                                                                                                                  |
| EPI_ISL_1105496, EPI_ISL_1105497, EPI_ISL_1105498, EPI_ISL_1105499, EPI_ISL_1105500, EPI_ISL_1105501, EPI_ISL_1105502, EPI_ISL_1105503, EPI_ISL_1105504, EPI_ISL_1105505, EPI_ISL_1105506, EPI_ISL_1105507, EPI_ISL_1105508, EPI_ISL_1105509, EPI_ISL_1105510                                                                     | see above                                                                                                                                                                        | Northumbria University / South Tees Hospitals NHS Foundation Trust / North Cumbria Integrated Care NHS Foundation Trust / North Tees and Hartlepool NHS Foundation Trust / Newcastle Hospitals NHS Foundation Trust | COVID-19 Genomics UK (COG-UK) Consortium                                                                                                                                                                                                                                                                                                                                                                                                                                                                                                                                                                                                                                                                    | Darren L Smith,Andrew Nelson,Matthew Bashton,Greg R Young,Joshua Loh,John Allan,Mohammad A Tariq,Giles S Holt,Gary Black,Wen C Yew,Lynn Dover,Paul Baker,Steve Liggett,Sarah Essex,Jane Greenaway,Debra Padgett,Clive Graham,Garren Scott,Edward Barton,Emma Swindells,Brendan Payne,Jennifer Collins,Yusri Taha,Gary Eltringham |
| EPI_ISL_1105511, EPI_ISL_1105512                                                                                                                                                                                                                                                                                                  | Centre for Enzyme Innovation, University of Portsmouth / Translational Research Laboratory, Portsmouth Hospitals NHS Trust                                                       | COVID-19 Genomics UK (COG-UK) Consortium                                                                                                                                                                            | Angela Beckett,Salman Goudarzi,Christopher Fearn,Kate Cook,Katie Loveson,Sharon Glaysher,Scott Elliott,Samuel Robson                                                                                                                                                                                                                                                                                                                                                                                                                                                                                                                                                                                        |                                                                                                                                                                                                                                                                                                                                  |
| EPI_ISL_1105513, EPI_ISL_1105514, EPI_ISL_1105515, EPI_ISL_1105516, EPI_ISL_1105517, EPI_ISL_1105518, EPI_ISL_1105519, EPI_ISL_1105520, EPI_ISL_1105521, EPI_ISL_1105522, EPI_ISL_1105523                                                                                                                                         | see above                                                                                                                                                                        | Northumbria University / South Tees Hospitals NHS Foundation Trust / North Cumbria Integrated Care NHS Foundation Trust / North Tees and Hartlepool NHS Foundation Trust / Newcastle Hospitals NHS Foundation Trust | COVID-19 Genomics UK (COG-UK) Consortium                                                                                                                                                                                                                                                                                                                                                                                                                                                                                                                                                                                                                                                                    | Darren L Smith,Andrew Nelson,Matthew Bashton,Greg R Young,Joshua Loh,John Allan,Mohammad A Tariq,Giles S Holt,Gary Black,Wen C Yew,Lynn Dover,Paul Baker,Steve Liggett,Sarah Essex,Jane Greenaway,Debra Padgett,Clive Graham,Garren Scott,Edward Barton,Emma Swindells,Brendan Payne,Jennifer Collins,Yusri Taha,Gary Eltringham |
| EPI_ISL_1105871, EPI_ISL_1105889, EPI_ISL_1105890, EPI_ISL_1105891, EPI_ISL_1105892, EPI_ISL_1105893, EPI_ISL_1105895, EPI_ISL_1105896, EPI_ISL_1105899, EPI_ISL_1105902                                                                                                                                                          | Lincolnshire Hospitals and DeepSeq Nottingham                                                                                                                                    | COVID-19 Genomics UK (COG-UK) Consortium                                                                                                                                                                            | Nichola Duckworth, Tim Sloan, Sarah Walsh, Jonathan Ball, Patrick McClure, Joeseph Chappell, Nadine Holmes, Matthew Carlisle, Christopher Moore, Fei Sang, Johnny Debebe, Victoria Wright, Matthew Loose                                                                                                                                                                                                                                                                                                                                                                                                                                                                                                    |                                                                                                                                                                                                                                                                                                                                  |
| EPI_ISL_1107586, EPI_ISL_1107663, EPI_ISL_1107664, EPI_ISL_1107785                                                                                                                                                                                                                                                                | Centre for Enzyme Innovation, University of Portsmouth / Translational Research Laboratory, Portsmouth Hospitals NHS Trust                                                       | COVID-19 Genomics UK (COG-UK) Consortium                                                                                                                                                                            | Angela Beckett,Salman Goudarzi,Christopher Fearn,Kate Cook,Katie Loveson,Sharon Glaysher,Scott Elliott,Samuel Robson                                                                                                                                                                                                                                                                                                                                                                                                                                                                                                                                                                                        |                                                                                                                                                                                                                                                                                                                                  |
| EPI_ISL_1177722, EPI_ISL_1177723                                                                                                                                                                                                                                                                                                  | Virology Department, Royal Infirmary of Edinburgh, NHS Lothian / School of Biological Sciences, University of Edinburgh                                                          | COVID-19 Genomics UK (COG-UK) Consortium                                                                                                                                                                            | McHugh M, Dewar R, Cotton S, Rooke S, O'Toole Á, Scher E, Hill V, McCrone JT, Colquhoun R, Yu X, Jackson B, Rambaut A, Templeton K                                                                                                                                                                                                                                                                                                                                                                                                                                                                                                                                                                          |                                                                                                                                                                                                                                                                                                                                  |
| EPI_ISL_1178150, EPI_ISL_1178151, EPI_ISL_1178152, EPI_ISL_1178153, EPI_ISL_1178154, EPI_ISL_1178155, EPI_ISL_1178156, EPI_ISL_1178157, EPI_ISL_1178158, EPI_ISL_1178159, EPI_ISL_1178160, EPI_ISL_1178161, EPI_ISL_1178162, EPI_ISL_1178163, EPI_ISL_1178164, EPI_ISL_1178165, EPI_ISL_1178166, EPI_ISL_1178167, EPI_ISL_1178168 | see above                                                                                                                                                                        | Northumbria University / South Tees Hospitals NHS Foundation Trust / North Cumbria Integrated Care NHS Foundation Trust / North Tees and Hartlepool NHS Foundation Trust / Newcastle Hospitals NHS Foundation Trust | COVID-19 Genomics UK (COG-UK) Consortium                                                                                                                                                                                                                                                                                                                                                                                                                                                                                                                                                                                                                                                                    | Darren L Smith,Andrew Nelson,Matthew Bashton,Greg R Young,Joshua Loh,John Allan,Mohammad A Tariq,Giles S Holt,Gary Black,Wen C Yew,Lynn Dover,Paul Baker,Steve Liggett,Sarah Essex,Jane Greenaway,Debra Padgett,Clive Graham,Garren Scott,Edward Barton,Emma Swindells,Brendan Payne,Jennifer Collins,Yusri Taha,Gary Eltringham |
| EPI_ISL_1178498, EPI_ISL_1178502, EPI_ISL_1178503, EPI_ISL_1178505                                                                                                                                                                                                                                                                | Quadram Institute Bioscience                                                                                                                                                     | COVID-19 Genomics UK (COG-UK) Consortium                                                                                                                                                                            | Dave J. Baker, Gemma L. Kay, Alp Aydin, Thanh Le-Viet, Steven Rudder, Ana P. Tedim, Anastasia Kolyva, Maria Diaz, Leonardo de Oliveira Martins, Nabil-Fareed Alikhan, Lizzie Meadows, Rachael Stanley, Ngozi Elumogo, Muhammed Yasir, Nicholas M. Thomson, Alexander J Trotter, Rachel Gilroy, Samuel Bloomfield, Claire Stuart, Andrew Bell, Reenesh Prakash, Samir Dervisevic, Alison E. Mather, John Wain, Mark Webber, Andrew J. Page, Justin O'Grady                                                                                                                                                                                                                                                   |                                                                                                                                                                                                                                                                                                                                  |
| EPI_ISL_1180058, EPI_ISL_1180059                                                                                                                                                                                                                                                                                                  | Virology Department, Sheffield Teaching Hospitals NHS Foundation Trust/Department of Infection, Immunity and Cardiovascular Disease, The Medical School, University of Sheffield | COVID-19 Genomics UK (COG-UK) Consortium                                                                                                                                                                            | Thushan de Silva, Matthew Parker, Nikki Smith, Adri Angyal, Rebecca Brown, Luke Green, Rachel Tucker, Paul Parsons, Danielle Groves, Katie Johnson, Laura Carrilero, Alex Keeley, Dave Partridge, Matthew Wyles, Benjamin Lindsey, Mehmet Yavuz, Mohammad Raza, Cariad Evans                                                                                                                                                                                                                                                                                                                                                                                                                                |                                                                                                                                                                                                                                                                                                                                  |
| EPI_ISL_1223167, EPI_ISL_1223193, EPI_ISL_1223236, EPI_ISL_1223246, EPI_ISL_1223258, EPI_ISL_1223265, EPI_ISL_1223270, EPI_ISL_1223283, EPI_ISL_1223285, EPI_ISL_1223357                                                                                                                                                          | Lighthouse Lab in Cambridge                                                                                                                                                      | Wellcome Sanger Institute for the COVID-19 Genomics UK (COG-UK) Consortium                                                                                                                                          | Rob Howes, The Lighthouse Lab in Cambridge and Alex Alderton, Roberto Amato, Jeffrey Barrett, Sonia Goncalves, Ewan Harrison, David K. Jackson, Ian Johnston, Dominic Kwiatkowski, Cordelia Langford, John Sillitoe on behalf of the Wellcome Sanger Institute COVID-19 Surveillance Team                                                                                                                                                                                                                                                                                                                                                                                                                   |                                                                                                                                                                                                                                                                                                                                  |
| EPI_ISL_1247691, EPI_ISL_1247692                                                                                                                                                                                                                                                                                                  | Virology Department, Royal Infirmary of Edinburgh, NHS Lothian / School of Biological Sciences, University of Edinburgh                                                          | COVID-19 Genomics UK (COG-UK) Consortium                                                                                                                                                                            | McHugh M, Dewar R, Cotton S, Rooke S, O'Toole Á, Scher E, Hill V, McCrone JT, Colquhoun R, Yu X, Jackson B, Rambaut A, Templeton K                                                                                                                                                                                                                                                                                                                                                                                                                                                                                                                                                                          |                                                                                                                                                                                                                                                                                                                                  |
| EPI_ISL_1247823, EPI_ISL_1247824                                                                                                                                                                                                                                                                                                  | Liverpool Clinical Laboratories                                                                                                                                                  | COVID-19 Genomics UK (COG-UK) Consortium                                                                                                                                                                            | Sam Haldenby, Alistair Darby, Steve Paterson, Anita Lucaci, Julian Hiscox, M Almsaud, A Alrezaihi, Muhannad Alruwaili, Stuart D Armstrong, Jones Benjamin, Eleanor G Bentley, Anu Chawla, Jordan J Clark, Angela Cowell, Richard Eccles, Isabel Garcia-Dorival, Matthew Gemmell, Alessandro Gerada, PKF Gilmore, Richard Gregory, Ximeng Han, Catherine Hartley, Margaret Hughes, Miren Iturriza-Gomara, James Johnson, L Luu, Jenifer Manson, Charlotte Nelson, Elaine O'Toole, Cassie Olateju, Rebekah Penrice-Randal , Lucille Rainbow, N.P Randle, Trevor Ian Robinson, Parul Sharma, Ghada T Shawli, James P Stewart, Neil Swainston, Ecaterina Varnos, Joanne Watts, Mark Whitehead, Hermione Webster |                                                                                                                                                                                                                                                                                                                                  |
| EPI_ISL_1248160, EPI_ISL_1248161, EPI_ISL_1248170, EPI_ISL_1248180, EPI_ISL_1248190, EPI_ISL_1248198, EPI_ISL_1248199, EPI_ISL_1248258, EPI_ISL_1248262, EPI_ISL_1248264, EPI_ISL_1248266, EPI_ISL_1248531                                                                                                                        | see above                                                                                                                                                                        | University College London, Great Ormond Street Hospital for Children NHS Foundation Trust, Imperial College Healthcare NHS Trust                                                                                    | COVID-19 Genomics UK (COG-UK) Consortium                                                                                                                                                                                                                                                                                                                                                                                                                                                                                                                                                                                                                                                                    | Sergi Castellano, Rachel Williams, Mark Kristiansen, Paola Resende Silva, Sunando Roy, Tony Brooks, Helena Tutill, Paola Niola, Patricia Dyal, Charlotte Williams, Leysa Forrest, Yasmin Panchbhaya, Jacqueline Findlay, Samuel Weeks, Julianne Brown, Kathryn Harris, Paul Randell, James Price, Alison Holmes, Judith Breuer   |
| EPI_ISL_1248998, EPI_ISL_1249011, EPI_ISL_1249014, EPI_ISL_1249019, EPI_ISL_1249027                                                                                                                                                                                                                                               | Quadram Institute Bioscience                                                                                                                                                     | COVID-19 Genomics UK (COG-UK) Consortium                                                                                                                                                                            | Dave J. Baker, Gemma L. Kay, Alp Aydin, Thanh Le-Viet, Steven Rudder, Ana P. Tedim, Anastasia Kolyva, Maria Diaz, Leonardo de Oliveira Martins, Nabil-Fareed Alikhan, Lizzie Meadows, Rachael Stanley, Ngozi Elumogo, Muhammed Yasir, Nicholas M. Thomson, Alexander J Trotter, Rachel Gilroy, Samuel Bloomfield, Claire Stuart, Andrew Bell, Reenesh Prakash, Samir Dervisevic, Alison E. Mather, John Wain, Mark Webber, Andrew J. Page, Justin O'Grady                                                                                                                                                                                                                                                   |                                                                                                                                                                                                                                                                                                                                  |
| EPI_ISL_1249233, EPI_ISL_1249236, EPI_ISL_1249238, EPI_ISL_1249240                                                                                                                                                                                                                                                                | Oxford Viromics, NDM, University of Oxford: Oxford University Hospitals; Basingstoke and North Hampshire Hospital                                                                | COVID-19 Genomics UK (COG-UK) Consortium                                                                                                                                                                            | Tanya Golubchik, David Bonsall, George Macintyre, Amy Trebes, Mariateresa de Cesare, Catrin Moore, Alex Mobbs, Anita Justice, Robert Shaw, Monique Andersson, Timothy Peto, Emma Wise, Nathan Moore, Jessica Lynch, Nick Cortes, Matilde Mori, Stephen Kidd, David Buck, John Todd, Christophe Fraser                                                                                                                                                                                                                                                                                                                                                                                                       |                                                                                                                                                                                                                                                                                                                                  |
| EPI_ISL_1249257                                                                                                                                                                                                                                                                                                                   | Liverpool Clinical Laboratories                                                                                                                                                  | COVID-19 Genomics UK (COG-UK) Consortium                                                                                                                                                                            | Sam Haldenby, Alistair Darby, Steve Paterson, Anita Lucaci, Julian Hiscox, M Almsaud, A Alrezaihi, Muhannad Alruwaili, Stuart D Armstrong, Jones Benjamin, Eleanor G Bentley, Anu Chawla, Jordan J Clark, Angela Cowell, Richard Eccles, Isabel Garcia-Dorival, Matthew Gemmell, Alessandro Gerada, PKF Gilmore, Richard Gregory, Ximeng Han, Catherine Hartley, Margaret Hughes, Miren Iturriza-Gomara, James Johnson, L Luu, Jenifer Manson, Charlotte Nelson, Elaine O'Toole, Cassie Olateju, Rebekah Penrice-Randal , Lucille Rainbow, N.P Randle, Trevor Ian Robinson, Parul Sharma, Ghada T Shawli, James P Stewart, Neil Swainston, Ecaterina Varnos, Joanne Watts, Mark Whitehead, Hermione Webster |                                                                                                                                                                                                                                                                                                                                  |
| EPI_ISL_1250123                                                                                                                                                                                                                                                                                                                   | University of Exeter                                                                                                                                                             | COVID-19 Genomics UK (COG-UK) Consortium                                                                                                                                                                            | Ben Temperton,Aaron Jeffries,Michelle Michelsen,Joanna Warwick-Dugdale,Audrey Farbos,Robyn Manley,Stephen Michell,Jane Masoli                                                                                                                                                                                                                                                                                                                                                                                                                                                                                                                                                                               |                                                                                                                                                                                                                                                                                                                                  |
| EPI_ISL_1296594, EPI_ISL_1296595, EPI_ISL_1296596                                                                                                                                                                                                                                                                                 | Respiratory Virus Unit, National Infection Service, Public Health England                                                                                                        | COVID-19 Genomics UK (COG-UK) Consortium                                                                                                                                                                            | PHE Covid Sequencing Team                                                                                                                                                                                                                                                                                                                                                                                                                                                                                                                                                                                                                                                                                   |                                                                                                                                                                                                                                                                                                                                  |
| EPI_ISL_1308542, EPI_ISL_1308568, EPI_ISL_1308581                                                                                                                                                                                                                                                                                 | University of Exeter                                                                                                                                                             | COVID-19 Genomics UK (COG-UK) Consortium                                                                                                                                                                            | Ben Temperton,Aaron Jeffries,Michelle Michelsen,Joanna Warwick-Dugdale,Audrey Farbos,Robyn Manley,Stephen Michell,Jane Masoli                                                                                                                                                                                                                                                                                                                                                                                                                                                                                                                                                                               |                                                                                                                                                                                                                                                                                                                                  |
| EPI_ISL_1308706, EPI_ISL_1308840                                                                                                                                                                                                                                                                                                  | Virology Department, Royal Infirmary of Edinburgh, NHS                                                                                                                           | COVID-19 Genomics UK (COG-UK) Consortium                                                                                                                                                                            | McHugh M, Dewar R, Cotton S, Rooke S, O'Toole Á, Scher E, Hill V, McCrone JT, Colquhoun R, Yu X, Jackson B, Rambaut A, Templeton K                                                                                                                                                                                                                                                                                                                                                                                                                                                                                                                                                                          |                                                                                                                                                                                                                                                                                                                                  |

|                                                                                                                                                                                                                                                                                                                                                                                                                                                                                                                                                                                                                                                                                                                                                                                                                                                                                                                                                                                                                                                                                                                                                                                                                                                                                                                                                                                                                                                                                                                                                                                                                                                                                                                                                                                                                                                                                                                                                                                                                                |                                                                                                                                                                                                                     |                                                                            |                                                                                                                                                                                                                                                                                                                                                                                                                                                                                                                                                                                                                                                                                          |
|--------------------------------------------------------------------------------------------------------------------------------------------------------------------------------------------------------------------------------------------------------------------------------------------------------------------------------------------------------------------------------------------------------------------------------------------------------------------------------------------------------------------------------------------------------------------------------------------------------------------------------------------------------------------------------------------------------------------------------------------------------------------------------------------------------------------------------------------------------------------------------------------------------------------------------------------------------------------------------------------------------------------------------------------------------------------------------------------------------------------------------------------------------------------------------------------------------------------------------------------------------------------------------------------------------------------------------------------------------------------------------------------------------------------------------------------------------------------------------------------------------------------------------------------------------------------------------------------------------------------------------------------------------------------------------------------------------------------------------------------------------------------------------------------------------------------------------------------------------------------------------------------------------------------------------------------------------------------------------------------------------------------------------|---------------------------------------------------------------------------------------------------------------------------------------------------------------------------------------------------------------------|----------------------------------------------------------------------------|------------------------------------------------------------------------------------------------------------------------------------------------------------------------------------------------------------------------------------------------------------------------------------------------------------------------------------------------------------------------------------------------------------------------------------------------------------------------------------------------------------------------------------------------------------------------------------------------------------------------------------------------------------------------------------------|
| Lothian / School of Biological Sciences, University of Edinburgh                                                                                                                                                                                                                                                                                                                                                                                                                                                                                                                                                                                                                                                                                                                                                                                                                                                                                                                                                                                                                                                                                                                                                                                                                                                                                                                                                                                                                                                                                                                                                                                                                                                                                                                                                                                                                                                                                                                                                               |                                                                                                                                                                                                                     |                                                                            |                                                                                                                                                                                                                                                                                                                                                                                                                                                                                                                                                                                                                                                                                          |
| EPI_ISL_1309060, EPI_ISL_1309122                                                                                                                                                                                                                                                                                                                                                                                                                                                                                                                                                                                                                                                                                                                                                                                                                                                                                                                                                                                                                                                                                                                                                                                                                                                                                                                                                                                                                                                                                                                                                                                                                                                                                                                                                                                                                                                                                                                                                                                               | University College London, Great Ormond Street Hospital for Children NHS Foundation Trust, Imperial College Healthcare NHS Trust                                                                                    | COVID-19 Genomics UK (COG-UK) Consortium                                   | Sergi Castellano, Rachel Williams, Mark Kristiansen, Paola Resende Silva, Sunando Roy, Tony Brooks, Helena Tutill, Paola Niola, Patricia Dyal, Charlotte Williams, Leysa Forrest, Yasmin Panchbhaya, Jacqueline Findlay, Samuel Weeks, Julianne Brown, Kathryn Harris, Paul Randell, James Price, Alison Holmes, Judith Breuer                                                                                                                                                                                                                                                                                                                                                           |
| EPI_ISL_1309782, EPI_ISL_1387225, EPI_ISL_1387226, EPI_ISL_1387227                                                                                                                                                                                                                                                                                                                                                                                                                                                                                                                                                                                                                                                                                                                                                                                                                                                                                                                                                                                                                                                                                                                                                                                                                                                                                                                                                                                                                                                                                                                                                                                                                                                                                                                                                                                                                                                                                                                                                             | Oxford Viromics, NDM, University of Oxford; Oxford University Hospitals; Basingstoke and North Hampshire Hospital                                                                                                   | COVID-19 Genomics UK (COG-UK) Consortium                                   | Tanya Golubchik, David Bonsall, George Macintyre, Amy Trebes, Mariateresa de Cesare, Catrin Moore, Alex Mobbs, Anita Justice, Robert Shaw, Monique Andersson, Timothy Peto, Emma Wise, Nathan Moore, Jessica Lynch, Nick Cortes, Matilde Mori, Stephen Kidd, David Buck, John Todd, Christophe Fraser                                                                                                                                                                                                                                                                                                                                                                                    |
| EPI_ISL_1388738                                                                                                                                                                                                                                                                                                                                                                                                                                                                                                                                                                                                                                                                                                                                                                                                                                                                                                                                                                                                                                                                                                                                                                                                                                                                                                                                                                                                                                                                                                                                                                                                                                                                                                                                                                                                                                                                                                                                                                                                                | Centre for Enzyme Innovation, University of Portsmouth / Translational Research Laboratory, Portsmouth Hospitals NHS Trust                                                                                          | COVID-19 Genomics UK (COG-UK) Consortium                                   | Angela Beckett,Salman Goudarzi,Christopher Fearn,Kate Cook,Katie Loveson,Sharon Glaysher,Scott Elliott,Samuel Robson                                                                                                                                                                                                                                                                                                                                                                                                                                                                                                                                                                     |
| EPI_ISL_1475001, EPI_ISL_1475132, EPI_ISL_1475134                                                                                                                                                                                                                                                                                                                                                                                                                                                                                                                                                                                                                                                                                                                                                                                                                                                                                                                                                                                                                                                                                                                                                                                                                                                                                                                                                                                                                                                                                                                                                                                                                                                                                                                                                                                                                                                                                                                                                                              | Regional Virus Laboratory, Belfast Health and Social Care Trust                                                                                                                                                     | COVID-19 Genomics UK (COG-UK) Consortium                                   | Conall McCaughey, James McKenna, Tanya Curran, Susan Feeney, Alison Watt, Ciara Cox, Mairead Connor, Zoltan Molnar, David Simpson, Derek Fairley                                                                                                                                                                                                                                                                                                                                                                                                                                                                                                                                         |
| EPI_ISL_924166, EPI_ISL_924231, EPI_ISL_924281, EPI_ISL_924290, EPI_ISL_924296, EPI_ISL_924351, EPI_ISL_924376                                                                                                                                                                                                                                                                                                                                                                                                                                                                                                                                                                                                                                                                                                                                                                                                                                                                                                                                                                                                                                                                                                                                                                                                                                                                                                                                                                                                                                                                                                                                                                                                                                                                                                                                                                                                                                                                                                                 | Virology Department, Sheffield Teaching Hospitals NHS Foundation Trust/Department of Infection, Immunity and Cardiovascular Disease, The Medical School, University of Sheffield                                    | COVID-19 Genomics UK (COG-UK) Consortium                                   | Thushan de Silva, Matthew Parker, Nikki Smith, Adri Angyal, Rebecca Brown, Luke Green, Rachel Tucker, Paul Parsons, Danielle Groves, Katie Johnson, Laura Carrilero, Alex Keeley, Dave Partridge, Matthew Wyles, Benjamin Lindsey, Mehmet Yavuz, Mohammad Raza, Cariad Evans                                                                                                                                                                                                                                                                                                                                                                                                             |
| EPI_ISL_949559                                                                                                                                                                                                                                                                                                                                                                                                                                                                                                                                                                                                                                                                                                                                                                                                                                                                                                                                                                                                                                                                                                                                                                                                                                                                                                                                                                                                                                                                                                                                                                                                                                                                                                                                                                                                                                                                                                                                                                                                                 | Department of Pathology, University of Cambridge                                                                                                                                                                    | COVID-19 Genomics UK (COG-UK) Consortium                                   | Aminu S. Jahun, Yasmin Chaudhry, Iliana Georgana, Myra Hosmillo, Rhys Izu, Martin D. Curran, Surendra Parmar, Ian Goodfellow                                                                                                                                                                                                                                                                                                                                                                                                                                                                                                                                                             |
| EPI_ISL_949613, EPI_ISL_949629                                                                                                                                                                                                                                                                                                                                                                                                                                                                                                                                                                                                                                                                                                                                                                                                                                                                                                                                                                                                                                                                                                                                                                                                                                                                                                                                                                                                                                                                                                                                                                                                                                                                                                                                                                                                                                                                                                                                                                                                 | West of Scotland Specialist Virology Centre, NHSGGC / MRC-University of Glasgow Centre for Virus Research                                                                                                           | COVID-19 Genomics UK (COG-UK) Consortium                                   | Ana da Silva Filipe, Natasha Johnson, Kathy Smollett, Daniel Mair, Stephen Carmichael, Alice Broos, Lily Tong, Jenna Nichols, Kyriaki Nomikou; Sarah McDonald; Richard Orton, Joseph Hughes, Sreenu Vattipally, David L Robertson; Alasdair MacLean, Rory Gunson; Sharif Shaaban, Matthew Holden; Rachel Blacow, Guy Mollett, Kathy Li, James Shepherd, Antonia Ho, Emma Thomson                                                                                                                                                                                                                                                                                                         |
| EPI_ISL_949712, EPI_ISL_949713, EPI_ISL_949714, EPI_ISL_949715, EPI_ISL_949716, EPI_ISL_949718, EPI_ISL_949721, EPI_ISL_949724, EPI_ISL_949725, EPI_ISL_949729, EPI_ISL_949731, EPI_ISL_949732, EPI_ISL_949733, EPI_ISL_949734, EPI_ISL_949735, EPI_ISL_949736, EPI_ISL_949737, EPI_ISL_949738, EPI_ISL_949739, EPI_ISL_949741                                                                                                                                                                                                                                                                                                                                                                                                                                                                                                                                                                                                                                                                                                                                                                                                                                                                                                                                                                                                                                                                                                                                                                                                                                                                                                                                                                                                                                                                                                                                                                                                                                                                                                 |                                                                                                                                                                                                                     |                                                                            |                                                                                                                                                                                                                                                                                                                                                                                                                                                                                                                                                                                                                                                                                          |
| see above                                                                                                                                                                                                                                                                                                                                                                                                                                                                                                                                                                                                                                                                                                                                                                                                                                                                                                                                                                                                                                                                                                                                                                                                                                                                                                                                                                                                                                                                                                                                                                                                                                                                                                                                                                                                                                                                                                                                                                                                                      | Liverpool Clinical Laboratories                                                                                                                                                                                     | COVID-19 Genomics UK (COG-UK) Consortium                                   | Sam Haldenby, Anita Lucaci, Steve Paterson, Julian Hiscox, Alistair Darby, M Almsaud, A Alrezaihi, Muhannad Alruwaili, Stuart D Armstrong, Jones Benjamin, Eleanor G Bentley, Anu Chawla, Jordan J Clark, Angela Cowell, Richard Eccles, Isabel Garcia-Dorival, Matthew Gemmell, Alessandro Gerada, PKF Gilmore, Richard Gregory, Ximeng Han, Catherine Hartley, Margaret Hughes, Miren Iturriza-Gomara, James Johnson, L Luu, Jenifer Manson, Charlotte Nelson, Elaine O'Toole, Cassie Olateju, Rebekah Penrice-Randal , Lucille Rainbow, N.P Randle, Trevor Ian Robinson, Parul Sharma, Ghada T Shawli, James P Stewart, Neil Swainston, Ecaterina Vamos, Joanne Watts, Mark Whitehead |
| EPI_ISL_949812, EPI_ISL_949813, EPI_ISL_949819, EPI_ISL_949831, EPI_ISL_949833, EPI_ISL_949834, EPI_ISL_949836, EPI_ISL_949837, EPI_ISL_949838, EPI_ISL_949839, EPI_ISL_949840, EPI_ISL_949841, EPI_ISL_949842, EPI_ISL_949843, EPI_ISL_949844, EPI_ISL_949845, EPI_ISL_949846, EPI_ISL_949847, EPI_ISL_949848, EPI_ISL_949855, EPI_ISL_949920, EPI_ISL_949926, EPI_ISL_949928, EPI_ISL_949929, EPI_ISL_949931, EPI_ISL_949934, EPI_ISL_949938, EPI_ISL_949939, EPI_ISL_949941, EPI_ISL_949942, EPI_ISL_949943, EPI_ISL_949945, EPI_ISL_949946, EPI_ISL_949951, EPI_ISL_949952, EPI_ISL_949954, EPI_ISL_949955, EPI_ISL_949956, EPI_ISL_949958, EPI_ISL_949960                                                                                                                                                                                                                                                                                                                                                                                                                                                                                                                                                                                                                                                                                                                                                                                                                                                                                                                                                                                                                                                                                                                                                                                                                                                                                                                                                                 |                                                                                                                                                                                                                     |                                                                            |                                                                                                                                                                                                                                                                                                                                                                                                                                                                                                                                                                                                                                                                                          |
| see above                                                                                                                                                                                                                                                                                                                                                                                                                                                                                                                                                                                                                                                                                                                                                                                                                                                                                                                                                                                                                                                                                                                                                                                                                                                                                                                                                                                                                                                                                                                                                                                                                                                                                                                                                                                                                                                                                                                                                                                                                      | University College London, Great Ormond Street Hospital for Children NHS Foundation Trust, Imperial College Healthcare NHS Trust                                                                                    | COVID-19 Genomics UK (COG-UK) Consortium                                   | Sergi Castellano, Rachel Williams, Mark Kristiansen, Paola Resende Silva, Sunando Roy, Tony Brooks, Helena Tutill, Paola Niola, Patricia Dyal, Charlotte Williams, Leysa Forrest, Yasmin Panchbhaya, Jacqueline Findlay, Samuel Weeks, Julianne Brown, Kathryn Harris, Paul Randell, James Price, Alison Holmes, Judith Breuer                                                                                                                                                                                                                                                                                                                                                           |
| EPI_ISL_950424, EPI_ISL_950428, EPI_ISL_950429, EPI_ISL_950430, EPI_ISL_950431, EPI_ISL_950432, EPI_ISL_950433, EPI_ISL_950434                                                                                                                                                                                                                                                                                                                                                                                                                                                                                                                                                                                                                                                                                                                                                                                                                                                                                                                                                                                                                                                                                                                                                                                                                                                                                                                                                                                                                                                                                                                                                                                                                                                                                                                                                                                                                                                                                                 | Northumbria University / South Tees Hospitals NHS Foundation Trust / North Cumbria Integrated Care NHS Foundation Trust / North Tees and Hartlepool NHS Foundation Trust / Newcastle Hospitals NHS Foundation Trust | COVID-19 Genomics UK (COG-UK) Consortium                                   | Darren L Smith,Andrew Nelson,Matthew Bashton,Greg R Young,Joshua Loh,John Allan,Mohammad A Tariq,Gilles S Holt,Gary Black,Wen C Yew,Lynn Dover,Paul Baker,Steve Liggett,Sarah Essex,Jane Greenaway,Debra Padgett,Clive Graham,Garren Scott,Edward Barton,Emma Swindells,Brendan Payne,Jennifer Collins,Yusrli Taha,Gary Eltringham                                                                                                                                                                                                                                                                                                                                                       |
| EPI_ISL_950662, EPI_ISL_950663, EPI_ISL_950664, EPI_ISL_950665, EPI_ISL_950666, EPI_ISL_950667, EPI_ISL_950668, EPI_ISL_950669, EPI_ISL_950670, EPI_ISL_950671, EPI_ISL_950672, EPI_ISL_950673, EPI_ISL_950674, EPI_ISL_950675, EPI_ISL_950676                                                                                                                                                                                                                                                                                                                                                                                                                                                                                                                                                                                                                                                                                                                                                                                                                                                                                                                                                                                                                                                                                                                                                                                                                                                                                                                                                                                                                                                                                                                                                                                                                                                                                                                                                                                 |                                                                                                                                                                                                                     |                                                                            |                                                                                                                                                                                                                                                                                                                                                                                                                                                                                                                                                                                                                                                                                          |
| see above                                                                                                                                                                                                                                                                                                                                                                                                                                                                                                                                                                                                                                                                                                                                                                                                                                                                                                                                                                                                                                                                                                                                                                                                                                                                                                                                                                                                                                                                                                                                                                                                                                                                                                                                                                                                                                                                                                                                                                                                                      | Queens Medical Centre, Clinical Microbiology Department / DeepSeq Nottingham                                                                                                                                        | COVID-19 Genomics UK (COG-UK) Consortium                                   | Gemma Clark, Wendy Smith, Manjinder Khakh, Vicki M Fleming, Michelle M Lister, Hannah Howson-Wells, Jonathan Ball, Patrick McClure, Joseph Chappell, Theocharis Tsoleiridis, Nadine Holmes, Matthew Carlisle, Christopher Moore, Fei Sang, Johnny Debebe, Victoria Wright, Matthew Loose                                                                                                                                                                                                                                                                                                                                                                                                 |
| EPI_ISL_952251, EPI_ISL_952252, EPI_ISL_952253, EPI_ISL_952255, EPI_ISL_952256, EPI_ISL_952257, EPI_ISL_952258, EPI_ISL_952259, EPI_ISL_952261, EPI_ISL_952262, EPI_ISL_952263, EPI_ISL_952264, EPI_ISL_952266, EPI_ISL_952267, EPI_ISL_952268, EPI_ISL_952269, EPI_ISL_952270, EPI_ISL_952271, EPI_ISL_952272, EPI_ISL_952273, EPI_ISL_952274, EPI_ISL_952275, EPI_ISL_952276, EPI_ISL_952277, EPI_ISL_952278, EPI_ISL_952279, EPI_ISL_952280, EPI_ISL_952281, EPI_ISL_952282, EPI_ISL_952283, EPI_ISL_952284, EPI_ISL_952285, EPI_ISL_952286, EPI_ISL_952287, EPI_ISL_952288, EPI_ISL_952289, EPI_ISL_952290, EPI_ISL_952291, EPI_ISL_952292, EPI_ISL_952293, EPI_ISL_952294, EPI_ISL_952295, EPI_ISL_952296, EPI_ISL_952297, EPI_ISL_952299, EPI_ISL_952300, EPI_ISL_952301, EPI_ISL_952302, EPI_ISL_952303, EPI_ISL_952304, EPI_ISL_952305, EPI_ISL_952306, EPI_ISL_952307, EPI_ISL_952308, EPI_ISL_952309, EPI_ISL_952310, EPI_ISL_952311, EPI_ISL_952312, EPI_ISL_952313, EPI_ISL_952314, EPI_ISL_952315, EPI_ISL_952316, EPI_ISL_952317, EPI_ISL_952318, EPI_ISL_952319, EPI_ISL_952320, EPI_ISL_952321, EPI_ISL_952322, EPI_ISL_952323, EPI_ISL_952324, EPI_ISL_952325, EPI_ISL_952326, EPI_ISL_952327, EPI_ISL_952328, EPI_ISL_952329, EPI_ISL_952330, EPI_ISL_952331, EPI_ISL_952332, EPI_ISL_952333, EPI_ISL_952334, EPI_ISL_952335, EPI_ISL_952337, EPI_ISL_952338, EPI_ISL_952339, EPI_ISL_952340, EPI_ISL_952341, EPI_ISL_952342, EPI_ISL_952343, EPI_ISL_952344, EPI_ISL_952346, EPI_ISL_952347, EPI_ISL_952348, EPI_ISL_952349, EPI_ISL_952350, EPI_ISL_952351, EPI_ISL_952352, EPI_ISL_952353, EPI_ISL_952354, EPI_ISL_952355, EPI_ISL_952356, EPI_ISL_952357, EPI_ISL_952358, EPI_ISL_952359, EPI_ISL_952360, EPI_ISL_952361, EPI_ISL_952362, EPI_ISL_952363, EPI_ISL_952364, EPI_ISL_952366, EPI_ISL_952367, EPI_ISL_952368, EPI_ISL_952370, EPI_ISL_952371, EPI_ISL_952372, EPI_ISL_952373, EPI_ISL_952374, EPI_ISL_952375, EPI_ISL_952376                                                                 |                                                                                                                                                                                                                     |                                                                            |                                                                                                                                                                                                                                                                                                                                                                                                                                                                                                                                                                                                                                                                                          |
| see above                                                                                                                                                                                                                                                                                                                                                                                                                                                                                                                                                                                                                                                                                                                                                                                                                                                                                                                                                                                                                                                                                                                                                                                                                                                                                                                                                                                                                                                                                                                                                                                                                                                                                                                                                                                                                                                                                                                                                                                                                      | Originating lab: Wales Specialist Virology Centre Sequencing lab: Pathogen Genomics Unit                                                                                                                            | Public Health Wales Microbiology Cardiff Wales Specialist Virology Centre  | Catherine Moore, Johnathan Evans, Laura Gifford, Malorie Perry, Simon Cottrell, Angela Marchbank, Alec Birchley, Alexander Adams, Amy Gaskin, Bree Gatica-Wilcox, Jason Coombes, Joel Southgate, Lauren Gilbert, Lee Graham, Nicole Pacchiarini, Sara Kumziene-Summerhayes, Sarah Taylor, Sophie Jones, Sara Rey, Matthew Bull, Joanne Watkins, Sally Corden, Tom Connor                                                                                                                                                                                                                                                                                                                 |
| EPI_ISL_952486, EPI_ISL_952487, EPI_ISL_952488                                                                                                                                                                                                                                                                                                                                                                                                                                                                                                                                                                                                                                                                                                                                                                                                                                                                                                                                                                                                                                                                                                                                                                                                                                                                                                                                                                                                                                                                                                                                                                                                                                                                                                                                                                                                                                                                                                                                                                                 | Centre for Enzyme Innovation, University of Portsmouth / Translational Research Laboratory, Portsmouth Hospitals NHS Trust                                                                                          | COVID-19 Genomics UK (COG-UK) Consortium                                   | Angela Beckett,Salman Goudarzi,Christopher Fearn,Kate Cook,Katie Loveson,Sharon Glaysher,Scott Elliott,Samuel Robson                                                                                                                                                                                                                                                                                                                                                                                                                                                                                                                                                                     |
| EPI_ISL_952954, EPI_ISL_952955, EPI_ISL_952964, EPI_ISL_952970, EPI_ISL_952980, EPI_ISL_952994, EPI_ISL_952997, EPI_ISL_953002                                                                                                                                                                                                                                                                                                                                                                                                                                                                                                                                                                                                                                                                                                                                                                                                                                                                                                                                                                                                                                                                                                                                                                                                                                                                                                                                                                                                                                                                                                                                                                                                                                                                                                                                                                                                                                                                                                 | Virology Department, Sheffield Teaching Hospitals NHS Foundation Trust/Department of Infection, Immunity and Cardiovascular Disease, The Medical School, University of Sheffield                                    | COVID-19 Genomics UK (COG-UK) Consortium                                   | Thushan de Silva, Matthew Parker, Nikki Smith, Adri Angyal, Rebecca Brown, Luke Green, Rachel Tucker, Paul Parsons, Danielle Groves, Katie Johnson, Laura Carrilero, Alex Keeley, Dave Partridge, Matthew Wyles, Benjamin Lindsey, Mehmet Yavuz, Mohammad Raza, Cariad Evans                                                                                                                                                                                                                                                                                                                                                                                                             |
| EPI_ISL_953276, EPI_ISL_953279, EPI_ISL_953283                                                                                                                                                                                                                                                                                                                                                                                                                                                                                                                                                                                                                                                                                                                                                                                                                                                                                                                                                                                                                                                                                                                                                                                                                                                                                                                                                                                                                                                                                                                                                                                                                                                                                                                                                                                                                                                                                                                                                                                 | Bioinformatics and Biostatistics Lab, Advanced Sequencing Facility                                                                                                                                                  | COVID-19 Genomics UK (COG-UK) Consortium                                   | Aengus Stewart,Jerome Nicod,Chelsea Sawyer,Laura Cubitt,Harshil Patel,Margaret Crawford                                                                                                                                                                                                                                                                                                                                                                                                                                                                                                                                                                                                  |
| EPI_ISL_957054, EPI_ISL_957055, EPI_ISL_957057, EPI_ISL_957060, EPI_ISL_957061, EPI_ISL_957065, EPI_ISL_957067, EPI_ISL_957068, EPI_ISL_957071, EPI_ISL_957072, EPI_ISL_957075, EPI_ISL_957077, EPI_ISL_957079, EPI_ISL_957080, EPI_ISL_957081, EPI_ISL_957083, EPI_ISL_957084, EPI_ISL_957086, EPI_ISL_957091, EPI_ISL_957092, EPI_ISL_957093, EPI_ISL_957095, EPI_ISL_957097, EPI_ISL_957099, EPI_ISL_957102, EPI_ISL_957104, EPI_ISL_957105, EPI_ISL_957107, EPI_ISL_957110, EPI_ISL_957114, EPI_ISL_957117, EPI_ISL_957118, EPI_ISL_957121, EPI_ISL_957122, EPI_ISL_957124, EPI_ISL_957130, EPI_ISL_957140, EPI_ISL_957141, EPI_ISL_957149, EPI_ISL_957151, EPI_ISL_957154, EPI_ISL_957155, EPI_ISL_957157, EPI_ISL_957158, EPI_ISL_957160, EPI_ISL_957162, EPI_ISL_957165, EPI_ISL_957166, EPI_ISL_957168, EPI_ISL_957170, EPI_ISL_957171, EPI_ISL_957172, EPI_ISL_957176, EPI_ISL_957177, EPI_ISL_957180, EPI_ISL_957183, EPI_ISL_957187, EPI_ISL_957188, EPI_ISL_957191, EPI_ISL_957198, EPI_ISL_957200, EPI_ISL_957201, EPI_ISL_957205, EPI_ISL_957206, EPI_ISL_957208, EPI_ISL_957210, EPI_ISL_957211, EPI_ISL_957215, EPI_ISL_957216, EPI_ISL_957219, EPI_ISL_957223, EPI_ISL_957224, EPI_ISL_957227, EPI_ISL_957229, EPI_ISL_957231, EPI_ISL_957237, EPI_ISL_957239, EPI_ISL_957242, EPI_ISL_957243, EPI_ISL_957245, EPI_ISL_957246, EPI_ISL_957248, EPI_ISL_957250, EPI_ISL_957253, EPI_ISL_957254, EPI_ISL_957255, EPI_ISL_957256, EPI_ISL_957257, EPI_ISL_957259, EPI_ISL_957260, EPI_ISL_957262, EPI_ISL_957266, EPI_ISL_957268, EPI_ISL_957270, EPI_ISL_957271, EPI_ISL_957272, EPI_ISL_957274, EPI_ISL_957275, EPI_ISL_957276, EPI_ISL_957285, EPI_ISL_957286, EPI_ISL_957291, EPI_ISL_957292, EPI_ISL_957294, EPI_ISL_957299, EPI_ISL_957302, EPI_ISL_957304, EPI_ISL_957306, EPI_ISL_957308, EPI_ISL_957310, EPI_ISL_957311, EPI_ISL_957312, EPI_ISL_957315, EPI_ISL_957319, EPI_ISL_957322, EPI_ISL_957323, EPI_ISL_957327, EPI_ISL_957328, EPI_ISL_957330, EPI_ISL_957331, EPI_ISL_957336, EPI_ISL_957337 |                                                                                                                                                                                                                     |                                                                            |                                                                                                                                                                                                                                                                                                                                                                                                                                                                                                                                                                                                                                                                                          |
| see above                                                                                                                                                                                                                                                                                                                                                                                                                                                                                                                                                                                                                                                                                                                                                                                                                                                                                                                                                                                                                                                                                                                                                                                                                                                                                                                                                                                                                                                                                                                                                                                                                                                                                                                                                                                                                                                                                                                                                                                                                      | Lighthouse Lab in Glasgow                                                                                                                                                                                           | Wellcome Sanger Institute for the COVID-19 Genomics UK (COG-UK) Consortium | Harper VanSteenhouse, Yumi Kasai, David Gray, Carol Clugston, Anna Dominiczak and Alex Alderton, Roberto Amato, Sonia Goncalves, Ewan Harrison, David K. Jackson, Ian Johnston, Dominic Kwiatkowski, Cordelia Langford, John Sillitoe on behalf of the Wellcome Sanger Institute COVID-19 Surveillance Team                                                                                                                                                                                                                                                                                                                                                                              |
| EPI_ISL_957617, EPI_ISL_957625                                                                                                                                                                                                                                                                                                                                                                                                                                                                                                                                                                                                                                                                                                                                                                                                                                                                                                                                                                                                                                                                                                                                                                                                                                                                                                                                                                                                                                                                                                                                                                                                                                                                                                                                                                                                                                                                                                                                                                                                 | Lighthouse Lab in Cambridge                                                                                                                                                                                         | Wellcome Sanger Institute for the COVID-19 Genomics UK (COG-UK) Consortium | Rob Howes, The Lighthouse Lab in Cambridge and Alex Alderton, Roberto Amato, Sonia Goncalves, Ewan Harrison, David K. Jackson, Ian Johnston, Dominic Kwiatkowski, Cordelia Langford, John Sillitoe on behalf of the Wellcome Sanger Institute COVID-19 Surveillance Team                                                                                                                                                                                                                                                                                                                                                                                                                 |
| EPI_ISL_957633                                                                                                                                                                                                                                                                                                                                                                                                                                                                                                                                                                                                                                                                                                                                                                                                                                                                                                                                                                                                                                                                                                                                                                                                                                                                                                                                                                                                                                                                                                                                                                                                                                                                                                                                                                                                                                                                                                                                                                                                                 | Lighthouse Lab in Glasgow                                                                                                                                                                                           | Wellcome Sanger Institute for the COVID-19 Genomics UK (COG-UK) Consortium | Harper VanSteenhouse, Yumi Kasai, David Gray, Carol Clugston, Anna Dominiczak and Alex Alderton, Roberto Amato, Sonia Goncalves, Ewan Harrison, David K. Jackson, Ian Johnston, Dominic Kwiatkowski, Cordelia Langford, John Sillitoe on behalf of the Wellcome Sanger Institute COVID-19 Surveillance Team                                                                                                                                                                                                                                                                                                                                                                              |
| EPI_ISL_957634, EPI_ISL_957636                                                                                                                                                                                                                                                                                                                                                                                                                                                                                                                                                                                                                                                                                                                                                                                                                                                                                                                                                                                                                                                                                                                                                                                                                                                                                                                                                                                                                                                                                                                                                                                                                                                                                                                                                                                                                                                                                                                                                                                                 | Lighthouse Lab in Cambridge                                                                                                                                                                                         | Wellcome Sanger Institute for the COVID-19 Genomics UK                     | Rob Howes, The Lighthouse Lab in Cambridge and Alex Alderton, Roberto Amato, Sonia Goncalves, Ewan Harrison, David K. Jackson, Ian Johnston,                                                                                                                                                                                                                                                                                                                                                                                                                                                                                                                                             |

[illegible]



[illegible]





[illegible]

[illegible]

|                                                                                                                                                                                                                                                                                                                                                                                                                                                                                                                                                                                                                                                                                                                |                                                                                                                         |                                                                            |                                                                                                                                                                                                                                                                                                                                                                                                                                         |
|----------------------------------------------------------------------------------------------------------------------------------------------------------------------------------------------------------------------------------------------------------------------------------------------------------------------------------------------------------------------------------------------------------------------------------------------------------------------------------------------------------------------------------------------------------------------------------------------------------------------------------------------------------------------------------------------------------------|-------------------------------------------------------------------------------------------------------------------------|----------------------------------------------------------------------------|-----------------------------------------------------------------------------------------------------------------------------------------------------------------------------------------------------------------------------------------------------------------------------------------------------------------------------------------------------------------------------------------------------------------------------------------|
| EPI_ISL_989306                                                                                                                                                                                                                                                                                                                                                                                                                                                                                                                                                                                                                                                                                                 | Lighthouse Lab in Alderley Park                                                                                         | Wellcome Sanger Institute for the COVID-19 Genomics UK (COG-UK) Consortium | Jacquelyn Wynn, Mairead Hyland, The Lighthouse Lab in Alderley Park and Alex Alderton, Roberto Amato, Sonia Goncalves, Ewan Harrison, David K. Jackson, Ian Johnston, Dominic Kwiatkowski, Cordelia Langford, John Sillitoe on behalf of the Wellcome Sanger Institute COVID-19 Surveillance Team ( <a href="http://www.sanger.ac.uk/covid-team">http://www.sanger.ac.uk/covid-team</a> )                                               |
| EPI_ISL_989307, EPI_ISL_989308, EPI_ISL_989309                                                                                                                                                                                                                                                                                                                                                                                                                                                                                                                                                                                                                                                                 | Lighthouse Lab in Alderley Park                                                                                         | Wellcome Sanger Institute for the COVID-19 Genomics UK (COG-UK) Consortium | Jacquelyn Wynn, Mairead Hyland, The Lighthouse Lab in Alderley Park and Alex Alderton, Roberto Amato, Sonia Goncalves, Ewan Harrison, David K. Jackson, Ian Johnston, Dominic Kwiatkowski, Cordelia Langford, John Sillitoe on behalf of the Wellcome Sanger Institute COVID-19 Surveillance Team                                                                                                                                       |
| EPI_ISL_989310                                                                                                                                                                                                                                                                                                                                                                                                                                                                                                                                                                                                                                                                                                 | Lighthouse Lab in Alderley Park                                                                                         | Wellcome Sanger Institute for the COVID-19 Genomics UK (COG-UK) Consortium | Jacquelyn Wynn, Mairead Hyland, The Lighthouse Lab in Alderley Park and Alex Alderton, Roberto Amato, Sonia Goncalves, Ewan Harrison, David K. Jackson, Ian Johnston, Dominic Kwiatkowski, Cordelia Langford, John Sillitoe on behalf of the Wellcome Sanger Institute COVID-19 Surveillance Team ( <a href="http://www.sanger.ac.uk/covid-team">http://www.sanger.ac.uk/covid-team</a> )                                               |
| EPI_ISL_989311, EPI_ISL_989312, EPI_ISL_989313, EPI_ISL_989314, EPI_ISL_989315, EPI_ISL_989316, EPI_ISL_989317, EPI_ISL_989318, EPI_ISL_989319, EPI_ISL_989320                                                                                                                                                                                                                                                                                                                                                                                                                                                                                                                                                 | Lighthouse Lab in Alderley Park                                                                                         | Wellcome Sanger Institute for the COVID-19 Genomics UK (COG-UK) Consortium | Jacquelyn Wynn, Mairead Hyland, The Lighthouse Lab in Alderley Park and Alex Alderton, Roberto Amato, Sonia Goncalves, Ewan Harrison, David K. Jackson, Ian Johnston, Dominic Kwiatkowski, Cordelia Langford, John Sillitoe on behalf of the Wellcome Sanger Institute COVID-19 Surveillance Team                                                                                                                                       |
| EPI_ISL_989321                                                                                                                                                                                                                                                                                                                                                                                                                                                                                                                                                                                                                                                                                                 | Lighthouse Lab in Alderley Park                                                                                         | Wellcome Sanger Institute for the COVID-19 Genomics UK (COG-UK) Consortium | Jacquelyn Wynn, Mairead Hyland, The Lighthouse Lab in Alderley Park and Alex Alderton, Roberto Amato, Sonia Goncalves, Ewan Harrison, David K. Jackson, Ian Johnston, Dominic Kwiatkowski, Cordelia Langford, John Sillitoe on behalf of the Wellcome Sanger Institute COVID-19 Surveillance Team ( <a href="http://www.sanger.ac.uk/covid-team">http://www.sanger.ac.uk/covid-team</a> )                                               |
| EPI_ISL_989322, EPI_ISL_989323, EPI_ISL_989324                                                                                                                                                                                                                                                                                                                                                                                                                                                                                                                                                                                                                                                                 | Lighthouse Lab in Alderley Park                                                                                         | Wellcome Sanger Institute for the COVID-19 Genomics UK (COG-UK) Consortium | Jacquelyn Wynn, Mairead Hyland, The Lighthouse Lab in Alderley Park and Alex Alderton, Roberto Amato, Sonia Goncalves, Ewan Harrison, David K. Jackson, Ian Johnston, Dominic Kwiatkowski, Cordelia Langford, John Sillitoe on behalf of the Wellcome Sanger Institute COVID-19 Surveillance Team                                                                                                                                       |
| EPI_ISL_989325                                                                                                                                                                                                                                                                                                                                                                                                                                                                                                                                                                                                                                                                                                 | Lighthouse Lab in Alderley Park                                                                                         | Wellcome Sanger Institute for the COVID-19 Genomics UK (COG-UK) Consortium | Jacquelyn Wynn, Mairead Hyland, The Lighthouse Lab in Alderley Park and Alex Alderton, Roberto Amato, Sonia Goncalves, Ewan Harrison, David K. Jackson, Ian Johnston, Dominic Kwiatkowski, Cordelia Langford, John Sillitoe on behalf of the Wellcome Sanger Institute COVID-19 Surveillance Team ( <a href="http://www.sanger.ac.uk/covid-team">http://www.sanger.ac.uk/covid-team</a> )                                               |
| EPI_ISL_989326, EPI_ISL_989327, EPI_ISL_989328, EPI_ISL_989329, EPI_ISL_989330, EPI_ISL_989331, EPI_ISL_989332, EPI_ISL_989333, EPI_ISL_989334, EPI_ISL_989335, EPI_ISL_989336, EPI_ISL_989337, EPI_ISL_989338, EPI_ISL_989339, EPI_ISL_989340, EPI_ISL_989341, EPI_ISL_989342                                                                                                                                                                                                                                                                                                                                                                                                                                 | see above                                                                                                               | Lighthouse Lab in Alderley Park                                            | Jacquelyn Wynn, Mairead Hyland, The Lighthouse Lab in Alderley Park and Alex Alderton, Roberto Amato, Sonia Goncalves, Ewan Harrison, David K. Jackson, Ian Johnston, Dominic Kwiatkowski, Cordelia Langford, John Sillitoe on behalf of the Wellcome Sanger Institute COVID-19 Surveillance Team                                                                                                                                       |
| EPI_ISL_989343                                                                                                                                                                                                                                                                                                                                                                                                                                                                                                                                                                                                                                                                                                 | Lighthouse Lab in Alderley Park                                                                                         | Wellcome Sanger Institute for the COVID-19 Genomics UK (COG-UK) Consortium | Jacquelyn Wynn, Mairead Hyland, The Lighthouse Lab in Alderley Park and Alex Alderton, Roberto Amato, Sonia Goncalves, Ewan Harrison, David K. Jackson, Ian Johnston, Dominic Kwiatkowski, Cordelia Langford, John Sillitoe on behalf of the Wellcome Sanger Institute COVID-19 Surveillance Team ( <a href="http://www.sanger.ac.uk/covid-team">http://www.sanger.ac.uk/covid-team</a> )                                               |
| EPI_ISL_989344, EPI_ISL_989345, EPI_ISL_989346, EPI_ISL_989347, EPI_ISL_989348, EPI_ISL_989349, EPI_ISL_989350, EPI_ISL_989351, EPI_ISL_989352, EPI_ISL_989353, EPI_ISL_989354, EPI_ISL_989355, EPI_ISL_989356, EPI_ISL_989357                                                                                                                                                                                                                                                                                                                                                                                                                                                                                 | see above                                                                                                               | Lighthouse Lab in Alderley Park                                            | Jacquelyn Wynn, Mairead Hyland, The Lighthouse Lab in Alderley Park and Alex Alderton, Roberto Amato, Sonia Goncalves, Ewan Harrison, David K. Jackson, Ian Johnston, Dominic Kwiatkowski, Cordelia Langford, John Sillitoe on behalf of the Wellcome Sanger Institute COVID-19 Surveillance Team                                                                                                                                       |
| EPI_ISL_989358, EPI_ISL_989359                                                                                                                                                                                                                                                                                                                                                                                                                                                                                                                                                                                                                                                                                 | Lighthouse Lab in Alderley Park                                                                                         | Wellcome Sanger Institute for the COVID-19 Genomics UK (COG-UK) Consortium | Jacquelyn Wynn, Mairead Hyland, The Lighthouse Lab in Alderley Park and Alex Alderton, Roberto Amato, Sonia Goncalves, Ewan Harrison, David K. Jackson, Ian Johnston, Dominic Kwiatkowski, Cordelia Langford, John Sillitoe on behalf of the Wellcome Sanger Institute COVID-19 Surveillance Team ( <a href="http://www.sanger.ac.uk/covid-team">http://www.sanger.ac.uk/covid-team</a> )                                               |
| EPI_ISL_989360, EPI_ISL_989361                                                                                                                                                                                                                                                                                                                                                                                                                                                                                                                                                                                                                                                                                 | Lighthouse Lab in Alderley Park                                                                                         | Wellcome Sanger Institute for the COVID-19 Genomics UK (COG-UK) Consortium | Jacquelyn Wynn, Mairead Hyland, The Lighthouse Lab in Alderley Park and Alex Alderton, Roberto Amato, Sonia Goncalves, Ewan Harrison, David K. Jackson, Ian Johnston, Dominic Kwiatkowski, Cordelia Langford, John Sillitoe on behalf of the Wellcome Sanger Institute COVID-19 Surveillance Team                                                                                                                                       |
| EPI_ISL_989362                                                                                                                                                                                                                                                                                                                                                                                                                                                                                                                                                                                                                                                                                                 | Lighthouse Lab in Milton Keynes                                                                                         | Wellcome Sanger Institute for the COVID-19 Genomics UK (COG-UK) Consortium | The Lighthouse Lab in Milton Keynes and Alex Alderton, Roberto Amato, Sonia Goncalves, Ewan Harrison, David K. Jackson, Ian Johnston, Dominic Kwiatkowski, Cordelia Langford, John Sillitoe on behalf of the Wellcome Sanger Institute COVID-19 Surveillance Team                                                                                                                                                                       |
| EPI_ISL_989444, EPI_ISL_989445, EPI_ISL_989446, EPI_ISL_989447, EPI_ISL_989448, EPI_ISL_989512, EPI_ISL_989513, EPI_ISL_989526                                                                                                                                                                                                                                                                                                                                                                                                                                                                                                                                                                                 | Lighthouse Lab in Alderley Park                                                                                         | Wellcome Sanger Institute for the COVID-19 Genomics UK (COG-UK) Consortium | Jacquelyn Wynn, Mairead Hyland, The Lighthouse Lab in Alderley Park and Alex Alderton, Roberto Amato, Sonia Goncalves, Ewan Harrison, David K. Jackson, Ian Johnston, Dominic Kwiatkowski, Cordelia Langford, John Sillitoe on behalf of the Wellcome Sanger Institute COVID-19 Surveillance Team ( <a href="http://www.sanger.ac.uk/covid-team">http://www.sanger.ac.uk/covid-team</a> )                                               |
| EPI_ISL_989534, EPI_ISL_989550, EPI_ISL_989553, EPI_ISL_989557, EPI_ISL_989593, EPI_ISL_989599, EPI_ISL_989602, EPI_ISL_989631, EPI_ISL_989669, EPI_ISL_989688, EPI_ISL_989695                                                                                                                                                                                                                                                                                                                                                                                                                                                                                                                                 | see above                                                                                                               | Lighthouse Lab in Glasgow                                                  | Harper VanSteenhouse, Yumi Kasai, David Gray, Carol Clugston, Anna Dominiczak and Alex Alderton, Roberto Amato, Sonia Goncalves, Ewan Harrison, David K. Jackson, Ian Johnston, Dominic Kwiatkowski, Cordelia Langford, John Sillitoe on behalf of the Wellcome Sanger Institute COVID-19 Surveillance Team ( <a href="http://www.sanger.ac.uk/covid-team">http://www.sanger.ac.uk/covid-team</a> )                                     |
| EPI_ISL_989696, EPI_ISL_989697, EPI_ISL_989698, EPI_ISL_989700, EPI_ISL_989702, EPI_ISL_989704, EPI_ISL_989705, EPI_ISL_989706, EPI_ISL_989708, EPI_ISL_989709, EPI_ISL_989710, EPI_ISL_989714, EPI_ISL_989715, EPI_ISL_989716, EPI_ISL_989717, EPI_ISL_989720, EPI_ISL_989721, EPI_ISL_989722, EPI_ISL_989723, EPI_ISL_989724, EPI_ISL_989725, EPI_ISL_989726, EPI_ISL_989727, EPI_ISL_989728, EPI_ISL_989729, EPI_ISL_989730, EPI_ISL_989731, EPI_ISL_989732, EPI_ISL_989734, EPI_ISL_989738, EPI_ISL_989739, EPI_ISL_989740, EPI_ISL_989744, EPI_ISL_989745, EPI_ISL_989746, EPI_ISL_989749, EPI_ISL_989754, EPI_ISL_989756, EPI_ISL_989757                                                                 | see above                                                                                                               | Lighthouse Lab in Alderley Park                                            | Jacquelyn Wynn, Mairead Hyland, The Lighthouse Lab in Alderley Park and Alex Alderton, Roberto Amato, Sonia Goncalves, Ewan Harrison, David K. Jackson, Ian Johnston, Dominic Kwiatkowski, Cordelia Langford, John Sillitoe on behalf of the Wellcome Sanger Institute COVID-19 Surveillance Team ( <a href="http://www.sanger.ac.uk/covid-team">http://www.sanger.ac.uk/covid-team</a> )                                               |
| EPI_ISL_989796, EPI_ISL_989797, EPI_ISL_989800, EPI_ISL_989801, EPI_ISL_989802, EPI_ISL_989803, EPI_ISL_989808, EPI_ISL_989809, EPI_ISL_989810, EPI_ISL_989811, EPI_ISL_989812, EPI_ISL_989813, EPI_ISL_989814, EPI_ISL_989816, EPI_ISL_989823, EPI_ISL_989825, EPI_ISL_989827, EPI_ISL_989828, EPI_ISL_989829, EPI_ISL_989830, EPI_ISL_989832, EPI_ISL_989833, EPI_ISL_989834, EPI_ISL_989835, EPI_ISL_989836, EPI_ISL_989837, EPI_ISL_989838, EPI_ISL_989839, EPI_ISL_989840, EPI_ISL_989841, EPI_ISL_989842, EPI_ISL_989843, EPI_ISL_989845, EPI_ISL_989846, EPI_ISL_989847, EPI_ISL_989848, EPI_ISL_989849, EPI_ISL_989850, EPI_ISL_989851, EPI_ISL_989852, EPI_ISL_989853, EPI_ISL_989854, EPI_ISL_989855 | see above                                                                                                               | Lighthouse Lab in Glasgow                                                  | Harper VanSteenhouse, Yumi Kasai, David Gray, Carol Clugston, Anna Dominiczak and Alex Alderton, Roberto Amato, Sonia Goncalves, Ewan Harrison, David K. Jackson, Ian Johnston, Dominic Kwiatkowski, Cordelia Langford, John Sillitoe on behalf of the Wellcome Sanger Institute COVID-19 Surveillance Team ( <a href="http://www.sanger.ac.uk/covid-team">http://www.sanger.ac.uk/covid-team</a> )                                     |
| EPI_ISL_996444, EPI_ISL_996445, EPI_ISL_996446, EPI_ISL_996452, EPI_ISL_996457, EPI_ISL_996468, EPI_ISL_996470                                                                                                                                                                                                                                                                                                                                                                                                                                                                                                                                                                                                 | University of Birmingham                                                                                                | COVID-19 Genomics UK (COG-UK) Consortium                                   | Institute of Microbiology, University of Birmingham: Claire McMurray, Joanne Stockton, Samuel Nicholls, Radoslaw Poplawski, Will Rowe, Josh Quick, Nicholas Loman, University of Birmingham Testing Laboratory: Celina M Whalley, Andrew Bosworth, Charlotte Poxon, Kasun Wanigasooriya, Oliver Pickles, Mike Kidd, Alex Richter, Andrew D Beggs PHE Heartlands Lab: Husam Osman, Andrew Bosworth. Queen Elizabeth Hospital: Anna Casey |
| EPI_ISL_996480, EPI_ISL_996481, EPI_ISL_996538, EPI_ISL_996539, EPI_ISL_996540, EPI_ISL_996541, EPI_ISL_996542, EPI_ISL_996547, EPI_ISL_996550, EPI_ISL_996565, EPI_ISL_996568                                                                                                                                                                                                                                                                                                                                                                                                                                                                                                                                 | see above                                                                                                               | University of Exeter                                                       | Ben Tempestton, Aaron Jeffries, Michelle Michelsen, Joanna Warwick-Dugdale, Audrey Farbos, Robyn Manley, Stephen Michell, Jane Masoli                                                                                                                                                                                                                                                                                                   |
| EPI_ISL_996604, EPI_ISL_996605, EPI_ISL_996606, EPI_ISL_996607, EPI_ISL_996608, EPI_ISL_996609, EPI_ISL_996610, EPI_ISL_996611, EPI_ISL_996612, EPI_ISL_996613, EPI_ISL_996614, EPI_ISL_996615, EPI_ISL_996616, EPI_ISL_996617, EPI_ISL_996618, EPI_ISL_996619, EPI_ISL_996620, EPI_ISL_996621, EPI_ISL_996622, EPI_ISL_996623, EPI_ISL_996624, EPI_ISL_996625, EPI_ISL_996626, EPI_ISL_996628, EPI_ISL_996629, EPI_ISL_996631, EPI_ISL_996644, EPI_ISL_996645, EPI_ISL_996646, EPI_ISL_996652, EPI_ISL_996654, EPI_ISL_996657, EPI_ISL_996668, EPI_ISL_996669                                                                                                                                                 | see above                                                                                                               | Department of Pathology, University of Cambridge                           | Aminu S. Jahun, Yasmin Chaudhry, Iliana Georgana, Myra Hosmillo, Rhys Izuagbe, William L. Hamilton, Martin D. Curran, Surendra Parmar, Ian Goodfellow                                                                                                                                                                                                                                                                                   |
| EPI_ISL_997062, EPI_ISL_997063                                                                                                                                                                                                                                                                                                                                                                                                                                                                                                                                                                                                                                                                                 | West of Scotland Specialist Virology Centre, NHSGCC / MRC-University of Glasgow Centre for Virus Research               | COVID-19 Genomics UK (COG-UK) Consortium                                   | Ana da Silva Filipe, Natasha Johnson, Kathy Smollett, Daniel Mair, Stephen Carmichael, Alice Broos, Lily Tong, Jenna Nichols, Kyriaki Nomikou; Sarah McDonald; Richard Orton, Joseph Hughes, Sreenu Vattipally, David L Robertson; Alasdair MacLean, Rory Gunson; Sharif Shaaban, Matthew Holden; Rachel Blacow, Guy Mollett, Kathy Li, James Shepherd, Antonia Ho, Emma Thomson                                                        |
| EPI_ISL_997109, EPI_ISL_997110, EPI_ISL_997111, EPI_ISL_997127                                                                                                                                                                                                                                                                                                                                                                                                                                                                                                                                                                                                                                                 | Virology Department, Royal Infirmary of Edinburgh, NHS Lothian / School of Biological Sciences, University of Edinburgh | COVID-19 Genomics UK (COG-UK) Consortium                                   | McHugh M, Dewar R, Cotton S, Rooke S, O'Toole Á, Scher E, Hill V, McCrone JT, Colquhoun R, Yu X, Jackson B, Rambaut A, Templeton K                                                                                                                                                                                                                                                                                                      |

|                                                                                                                                                                                                                                                                                                                                                                                                                                                                                                                                                                                                                                                                                                                                                                                                                                                                                                                                                |                                                                                                                                                                                                                     |                                                                           |                                                                                                                                                                                                                                                                                                                                                                                                                                                                                                                                                                                                                                                                                          |
|------------------------------------------------------------------------------------------------------------------------------------------------------------------------------------------------------------------------------------------------------------------------------------------------------------------------------------------------------------------------------------------------------------------------------------------------------------------------------------------------------------------------------------------------------------------------------------------------------------------------------------------------------------------------------------------------------------------------------------------------------------------------------------------------------------------------------------------------------------------------------------------------------------------------------------------------|---------------------------------------------------------------------------------------------------------------------------------------------------------------------------------------------------------------------|---------------------------------------------------------------------------|------------------------------------------------------------------------------------------------------------------------------------------------------------------------------------------------------------------------------------------------------------------------------------------------------------------------------------------------------------------------------------------------------------------------------------------------------------------------------------------------------------------------------------------------------------------------------------------------------------------------------------------------------------------------------------------|
| EPI_ISL_997418, EPI_ISL_997422, EPI_ISL_997423, EPI_ISL_997424, EPI_ISL_997425, EPI_ISL_997433, EPI_ISL_997443, EPI_ISL_997444, EPI_ISL_997445, EPI_ISL_997446, EPI_ISL_997447, EPI_ISL_997463, EPI_ISL_997464, EPI_ISL_997465, EPI_ISL_997466, EPI_ISL_997483, EPI_ISL_997484, EPI_ISL_997485, EPI_ISL_997488, EPI_ISL_997490, EPI_ISL_997494, EPI_ISL_997495, EPI_ISL_997506, EPI_ISL_997508                                                                                                                                                                                                                                                                                                                                                                                                                                                                                                                                                 |                                                                                                                                                                                                                     |                                                                           |                                                                                                                                                                                                                                                                                                                                                                                                                                                                                                                                                                                                                                                                                          |
| see above                                                                                                                                                                                                                                                                                                                                                                                                                                                                                                                                                                                                                                                                                                                                                                                                                                                                                                                                      | Liverpool Clinical Laboratories                                                                                                                                                                                     | COVID-19 Genomics UK (COG-UK) Consortium                                  | Sam Haldenby, Anita Lucaci, Steve Paterson, Julian Hiscox, Alistair Darby, M Almsaud, A Alrezaihi, Muhannad Alruwaili, Stuart D Armstrong, Jones Benjamin, Eleanor G Bentley, Anu Chawla, Jordan J Clark, Angela Cowell, Richard Eccles, Isabel Garcia-Dorival, Matthew Gemmell, Alessandro Gerada, PKF Gilmore, Richard Gregory, Ximeng Han, Catherine Hartley, Margaret Hughes, Miren Iturriza-Gomara, James Johnson, L Luu, Jenifer Manson, Charlotte Nelson, Elaine O'Toole, Cassie Olateju, Rebekah Penrice-Randal , Lucille Rainbow, N.P Randle, Trevor Ian Robinson, Parul Sharma, Ghada T Shawli, James P Stewart, Neil Swainston, Ecaterina Vamos, Joanne Watts, Mark Whitehead |
| EPI_ISL_997661, EPI_ISL_997668                                                                                                                                                                                                                                                                                                                                                                                                                                                                                                                                                                                                                                                                                                                                                                                                                                                                                                                 | Barts Health NHS Trust                                                                                                                                                                                              | COVID-19 Genomics UK (COG-UK) Consortium                                  | CUTINO-MOQUEL, Maria-Teresa; HARRINGTON, David; OWOYEMI, Dola; KULASEGARAN-SHYLINI, Raghavendran; BROAD, Claire; KELE, Beatrix                                                                                                                                                                                                                                                                                                                                                                                                                                                                                                                                                           |
| EPI_ISL_997726, EPI_ISL_997834, EPI_ISL_997890, EPI_ISL_997892, EPI_ISL_997893, EPI_ISL_997894, EPI_ISL_997895, EPI_ISL_997896, EPI_ISL_997905, EPI_ISL_997906, EPI_ISL_997907, EPI_ISL_997918, EPI_ISL_997929, EPI_ISL_997931, EPI_ISL_997932, EPI_ISL_997934, EPI_ISL_997938, EPI_ISL_997939, EPI_ISL_997940, EPI_ISL_997951                                                                                                                                                                                                                                                                                                                                                                                                                                                                                                                                                                                                                 |                                                                                                                                                                                                                     |                                                                           |                                                                                                                                                                                                                                                                                                                                                                                                                                                                                                                                                                                                                                                                                          |
| see above                                                                                                                                                                                                                                                                                                                                                                                                                                                                                                                                                                                                                                                                                                                                                                                                                                                                                                                                      | University College London, Great Ormond Street Hospital for Children NHS Foundation Trust, Imperial College Healthcare NHS Trust                                                                                    | COVID-19 Genomics UK (COG-UK) Consortium                                  | Sergi Castellano, Rachel Williams, Mark Kristiansen, Paola Resende Silva, Sunando Roy, Tony Brooks, Helena Tutill, Paola Niola, Patricia Dyal, Charlotte Williams, Leysa Forrest, Yasmin Panchbhaya, Jacqueline Findlay, Samuel Weeks, Julianne Brown, Kathryn Harris, Paul Randell, James Price, Alison Holmes, Judith Breuer                                                                                                                                                                                                                                                                                                                                                           |
| EPI_ISL_998099, EPI_ISL_998100, EPI_ISL_998101, EPI_ISL_998102, EPI_ISL_998103, EPI_ISL_998104, EPI_ISL_998105, EPI_ISL_998106, EPI_ISL_998107, EPI_ISL_998108, EPI_ISL_998109, EPI_ISL_998110, EPI_ISL_998111, EPI_ISL_998112, EPI_ISL_998113, EPI_ISL_998114, EPI_ISL_998115, EPI_ISL_998116, EPI_ISL_998117, EPI_ISL_998118, EPI_ISL_998119, EPI_ISL_998120, EPI_ISL_998121, EPI_ISL_998123, EPI_ISL_998124, EPI_ISL_998125, EPI_ISL_998126, EPI_ISL_998127, EPI_ISL_998128, EPI_ISL_998129, EPI_ISL_998130, EPI_ISL_998131, EPI_ISL_998132, EPI_ISL_998133, EPI_ISL_998134, EPI_ISL_998135                                                                                                                                                                                                                                                                                                                                                 |                                                                                                                                                                                                                     |                                                                           |                                                                                                                                                                                                                                                                                                                                                                                                                                                                                                                                                                                                                                                                                          |
| see above                                                                                                                                                                                                                                                                                                                                                                                                                                                                                                                                                                                                                                                                                                                                                                                                                                                                                                                                      | Virology Department, Sheffield Teaching Hospitals NHS Foundation Trust/Department of Infection, Immunity and Cardiovascular Disease, The Medical School, University of Sheffield                                    | COVID-19 Genomics UK (COG-UK) Consortium                                  | Thushan de Silva, Matthew Parker, Nikki Smith, Adri Angyal, Rebecca Brown, Luke Green, Rachel Tucker, Paul Parsons, Danielle Groves, Katie Johnson, Laura Carrilero, Alex Keeley, Dave Partridge, Matthew Wyles, Benjamin Lindsey, Mehmet Yavuz, Mohammad Raza, Cariad Evans                                                                                                                                                                                                                                                                                                                                                                                                             |
| EPI_ISL_998234                                                                                                                                                                                                                                                                                                                                                                                                                                                                                                                                                                                                                                                                                                                                                                                                                                                                                                                                 | Regional Virus Laboratory, Belfast Health and Social Care Trust                                                                                                                                                     | COVID-19 Genomics UK (COG-UK) Consortium                                  | Conall McCaughey, James McKenna, Tanya Curran, Susan Feeney, Alison Watt, Ciara Cox, Mairead Connor, Zoltan Molnar, David Simpson, Derek Fairley                                                                                                                                                                                                                                                                                                                                                                                                                                                                                                                                         |
| EPI_ISL_998511, EPI_ISL_998512, EPI_ISL_998513, EPI_ISL_998572, EPI_ISL_998573, EPI_ISL_998574, EPI_ISL_998575                                                                                                                                                                                                                                                                                                                                                                                                                                                                                                                                                                                                                                                                                                                                                                                                                                 | Northumbria University / South Tees Hospitals NHS Foundation Trust / North Cumbria Integrated Care NHS Foundation Trust / North Tees and Hartlepool NHS Foundation Trust / Newcastle Hospitals NHS Foundation Trust | COVID-19 Genomics UK (COG-UK) Consortium                                  | Darren L Smith,Andrew Nelson,Matthew Bashton,Greg R Young,Joshua Loh,John Allan,Mohammad A Tariq,Giles S Holt,Gary Black,Wen C Yew,Lynn Dover,Paul Baker,Steve Liggett,Sarah Essex,Jane Greenaway,Debra Padgett,Clive Graham,Garren Scott,Edward Barton,Emma Swindells,Brendan Payne,Jennifer Collins,Yusri Taha,Gary Eltringham                                                                                                                                                                                                                                                                                                                                                         |
| EPI_ISL_998854                                                                                                                                                                                                                                                                                                                                                                                                                                                                                                                                                                                                                                                                                                                                                                                                                                                                                                                                 | Quadram Institute Bioscience                                                                                                                                                                                        | COVID-19 Genomics UK (COG-UK) Consortium                                  | Dave J. Baker, Gemma L. Kay, Alp Aydin, Thanh Le-Viet, Steven Rudder, Ana P. Tedim, Anastasia Kolyva, Maria Diaz, Leonardo de Oliveira Martins, Nabil-Fareed Alikhan, Lizzie Meadows, Rachael Stanley, Ngozi Elumogo, Muhammed Yasir, Nicholas M. Thomson, Alexander J Trotter, Rachel Gilroy, Samuel Bloomfield, Claire Stuart, Andrew Bell, Reenesh Prakash, Samir Devisevic, Alison E. Mather, John Wain, Mark Webber, Andrew J. Page, Justin O'Grady                                                                                                                                                                                                                                 |
| EPI_ISL_999518, EPI_ISL_999519, EPI_ISL_999520, EPI_ISL_999521, EPI_ISL_999530, EPI_ISL_999540, EPI_ISL_999546, EPI_ISL_999552, EPI_ISL_999561, EPI_ISL_999565, EPI_ISL_999566, EPI_ISL_999567, EPI_ISL_999569, EPI_ISL_999580, EPI_ISL_999582, EPI_ISL_999583, EPI_ISL_999588, EPI_ISL_999589, EPI_ISL_999590, EPI_ISL_999591, EPI_ISL_999592, EPI_ISL_999593, EPI_ISL_999609, EPI_ISL_999618, EPI_ISL_999623, EPI_ISL_999630, EPI_ISL_999634, EPI_ISL_999650, EPI_ISL_999655, EPI_ISL_999656, EPI_ISL_999735, EPI_ISL_999741, EPI_ISL_999742, EPI_ISL_999747, EPI_ISL_999750, EPI_ISL_999752, EPI_ISL_999753, EPI_ISL_999755, EPI_ISL_999756, EPI_ISL_999757, EPI_ISL_999758, EPI_ISL_999762, EPI_ISL_999767, EPI_ISL_999772, EPI_ISL_999774, EPI_ISL_999775, EPI_ISL_999776, EPI_ISL_999782, EPI_ISL_999807, EPI_ISL_999818, EPI_ISL_999819, EPI_ISL_999832, EPI_ISL_999847, EPI_ISL_999848, EPI_ISL_999852, EPI_ISL_999853, EPI_ISL_999859 |                                                                                                                                                                                                                     |                                                                           |                                                                                                                                                                                                                                                                                                                                                                                                                                                                                                                                                                                                                                                                                          |
| see above                                                                                                                                                                                                                                                                                                                                                                                                                                                                                                                                                                                                                                                                                                                                                                                                                                                                                                                                      | Originating lab: Wales Specialist Virology Centre Sequencing lab: Pathogen Genomics Unit                                                                                                                            | Public Health Wales Microbiology Cardiff Wales Specialist Virology Centre | Catherine Moore, Johnathan Evans, Laura Gifford, Malorie Perry, Simon Cottrell, Angela Marchbank, Alec Birchley, Alexander Adams, Amy Gaskin, Bree Gatica-Wilcox, Jason Coombes, Joel Southgate, Lauren Gilbert, Lee Graham, Nicole Pacchiarini, Sara Kumziene-Summerhayes, Sarah Taylor, Sophie Jones, Sara Rey, Matthew Bull, Joanne Watkins, Sally Corden, Tom Connor                                                                                                                                                                                                                                                                                                                 |
| EPI_ISL_999969                                                                                                                                                                                                                                                                                                                                                                                                                                                                                                                                                                                                                                                                                                                                                                                                                                                                                                                                 | Wales Specialist Virology Centre Sequencing lab: Pathogen Genomics Unit                                                                                                                                             | Public Health Wales Microbiology Cardiff Wales Specialist Virology Centre | Catherine Moore, Johnathan Evans, Laura Gifford, Malorie Perry, Simon Cottrell, Angela Marchbank, Alec Birchley, Alexander Adams, Amy Gaskin, Bree Gatica-Wilcox, Jason Coombes, Joel Southgate, Lauren Gilbert, Lee Graham, Nicole Pacchiarini, Sara Kumziene-Summerhayes, Sarah Taylor, Sophie Jones, Sara Rey, Matthew Bull, Joanne Watkins, Sally Corden, Tom Connor                                                                                                                                                                                                                                                                                                                 |
